# Supplementary material for: Effects of Cardiac Sympathetic Neurodegeneration and PPARγ Activation on Rhesus Macaque Whole Blood miRNA and mRNA Expression Profiles
Source: Biomed Res Int. 2020 May 2;2020:9426204. doi: 10.1155/2020/9426204 (PMC7212295; doi:10.1155/2020/9426204)
Supplement: Supplementary 2 — Supplementary Table 1: quality and concentration of all 30 extracted total RNA samples. [file 9426204.f10.xlsx]

## Sheet: Targets
Target Gene	Gene name
FUT9	fucosyltransferase 9 (alpha (1,3) fucosyltransferase)
AL353791.1
RORA	RAR-related orphan receptor A
MOB1B	MOB kinase activator 1B
RC3H2	ring finger and CCCH-type domains 2
RGS17	regulator of G-protein signaling 17
TSLP	thymic stromal lymphopoietin
QKI	QKI, KH domain containing, RNA binding
FAM133A	family with sequence similarity 133, member A
C14orf39	chromosome 14 open reading frame 39
RP11-944C7.1	Protein LOC100506792
RP11-67H2.1	Uncharacterized protein
ST8SIA1	ST8 alpha-N-acetyl-neuraminide alpha-2,8-sialyltransferase 1
CHI3L2	chitinase 3-like 2
AC024257.1	CDNA FLJ26186 fis, clone ADG04757; Uncharacterized protein
B2M	beta-2-microglobulin
CADM2	cell adhesion molecule 2
KLHL8	kelch-like family member 8
AC006967.1	Protein LOC100996426
CNR1	cannabinoid receptor 1 (brain)
LEAP2	liver expressed antimicrobial peptide 2
WDR49	WD repeat domain 49
AGO3	argonaute RISC catalytic component 3
AUH	AU RNA binding protein/enoyl-CoA hydratase
B3GALT6	UDP-Gal:betaGal beta 1,3-galactosyltransferase polypeptide 6
CTNNAL1	catenin (cadherin-associated protein), alpha-like 1
SYT16	synaptotagmin XVI
CTRC	chymotrypsin C (caldecrin)
MYL1	myosin, light chain 1, alkali; skeletal, fast
CD9	CD9 molecule
GMFB	glia maturation factor, beta
USP16	ubiquitin specific peptidase 16
BDH2	3-hydroxybutyrate dehydrogenase, type 2
TEX30	testis expressed 30
HOXC12	homeobox C12
CMTM7	CKLF-like MARVEL transmembrane domain containing 7
PEX5L	peroxisomal biogenesis factor 5-like
ZNF300	zinc finger protein 300
C2orf66	chromosome 2 open reading frame 66
AC117834.1
HORMAD1	HORMA domain containing 1
PIGP	phosphatidylinositol glycan anchor biosynthesis, class P
SLC9C2	solute carrier family 9, member C2 (putative)
C11orf1	chromosome 11 open reading frame 1
MRPS22	mitochondrial ribosomal protein S22
TUBB2B	tubulin, beta 2B class IIb
RPE	ribulose-5-phosphate-3-epimerase
CCDC122	coiled-coil domain containing 122
GABRA4	gamma-aminobutyric acid (GABA) A receptor, alpha 4
GALNT1	UDP-N-acetyl-alpha-D-galactosamine:polypeptide N-acetylgalactosaminyltransferase 1 (GalNAc-T1)
AL953854.2
LRRC8B	leucine rich repeat containing 8 family, member B
TXNDC12	thioredoxin domain containing 12 (endoplasmic reticulum)
CISD1	CDGSH iron sulfur domain 1
AC023632.1	HCG2009141; PRO2397; Uncharacterized protein
C5AR1	complement component 5a receptor 1
KIAA1456	KIAA1456
C10orf118	chromosome 10 open reading frame 118
RP11-826N14.2	Uncharacterized protein
SOX1	SRY (sex determining region Y)-box 1
CD200	CD200 molecule
PREX2	phosphatidylinositol-3,4,5-trisphosphate-dependent Rac exchange factor 2
FOXD4L5	forkhead box D4-like 5
FLRT2	fibronectin leucine rich transmembrane protein 2
GRIN2B	glutamate receptor, ionotropic, N-methyl D-aspartate 2B
CXCL10	chemokine (C-X-C motif) ligand 10
RAB23	RAB23, member RAS oncogene family
CSTF2	cleavage stimulation factor, 3' pre-RNA, subunit 2, 64kDa
CDH7	cadherin 7, type 2
DCUN1D5	DCN1, defective in cullin neddylation 1, domain containing 5
RAB1A	RAB1A, member RAS oncogene family
PLAGL1	pleiomorphic adenoma gene-like 1
ANKRD49	ankyrin repeat domain 49
RGS5	regulator of G-protein signaling 5
BET1	Bet1 golgi vesicular membrane trafficking protein
KLHDC1	kelch domain containing 1
LRRTM4	leucine rich repeat transmembrane neuronal 4
COL4A3	collagen, type IV, alpha 3 (Goodpasture antigen)
MEX3B	mex-3 RNA binding family member B
TM4SF18	transmembrane 4 L six family member 18
TBX20	T-box 20
FAM181A	family with sequence similarity 181, member A
RHOT1	ras homolog family member T1
EGFL6	EGF-like-domain, multiple 6
ERO1L	ERO1-like (S. cerevisiae)
KCNH5	potassium voltage-gated channel, subfamily H (eag-related), member 5
GPATCH2L	G patch domain containing 2-like
CREBZF	CREB/ATF bZIP transcription factor
ANKRD12	ankyrin repeat domain 12
CXCL5	chemokine (C-X-C motif) ligand 5
EPPIN	epididymal peptidase inhibitor
EPPIN-WFDC6	EPPIN-WFDC6 readthrough
ARPP19	cAMP-regulated phosphoprotein, 19kDa
C10orf129	chromosome 10 open reading frame 129
PNRC2	proline-rich nuclear receptor coactivator 2
KATNAL2	katanin p60 subunit A-like 2
TRPC1	transient receptor potential cation channel, subfamily C, member 1
TDG	thymine-DNA glycosylase
SUMO3	small ubiquitin-like modifier 3
SEPP1	selenoprotein P, plasma, 1
CXCL6	chemokine (C-X-C motif) ligand 6
RAB39A	RAB39A, member RAS oncogene family
KIAA1586	KIAA1586
CYP4F11	cytochrome P450, family 4, subfamily F, polypeptide 11
STEAP2	STEAP family member 2, metalloreductase
SLC22A9	solute carrier family 22 (organic anion transporter), member 9
CHM	choroideremia (Rab escort protein 1)
KHDRBS1	KH domain containing, RNA binding, signal transduction associated 1
OMA1	OMA1 zinc metallopeptidase
BACH1	BTB and CNC homology 1, basic leucine zipper transcription factor 1
KERA	keratocan
ZNF431	zinc finger protein 431
FAM228B	family with sequence similarity 228, member B
NEUROD6	neuronal differentiation 6
DNER	delta/notch-like EGF repeat containing
MAOA	monoamine oxidase A
OXCT1	3-oxoacid CoA transferase 1
AC135178.1	HCG1985372; Uncharacterized protein; cDNA FLJ37541 fis, clone BRCAN2026340
CCSAP	centriole, cilia and spindle-associated protein
RP11-181C3.1	Uncharacterized protein
BEX1	brain expressed, X-linked 1
RAB6A	RAB6A, member RAS oncogene family
SFXN1	sideroflexin 1
RPL7	ribosomal protein L7
CCNB2	cyclin B2
BHLHE22	basic helix-loop-helix family, member e22
KCNJ15	potassium inwardly-rectifying channel, subfamily J, member 15
CHL1	cell adhesion molecule L1-like
CYB5B	cytochrome b5 type B (outer mitochondrial membrane)
EXOC6	exocyst complex component 6
SAMD9L	sterile alpha motif domain containing 9-like
HDAC2	histone deacetylase 2
N4BP2	NEDD4 binding protein 2
HSDL1	hydroxysteroid dehydrogenase like 1
EMC7	ER membrane protein complex subunit 7
NUS1	nuclear undecaprenyl pyrophosphate synthase 1 homolog (S. cerevisiae)
CA13	carbonic anhydrase XIII
GALNT7	UDP-N-acetyl-alpha-D-galactosamine:polypeptide N-acetylgalactosaminyltransferase 7 (GalNAc-T7)
RFX7	regulatory factor X, 7
PAGE5	P antigen family, member 5 (prostate associated)
BTG1	B-cell translocation gene 1, anti-proliferative
SAMSN1	SAM domain, SH3 domain and nuclear localization signals 1
MFSD8	major facilitator superfamily domain containing 8
NUDT4	nudix (nucleoside diphosphate linked moiety X)-type motif 4
RP11-758M4.1	Uncharacterized protein
DSTN	destrin (actin depolymerizing factor)
AIMP1	aminoacyl tRNA synthetase complex-interacting multifunctional protein 1
MRPL34	mitochondrial ribosomal protein L34
LCA5	Leber congenital amaurosis 5
FOLH1	folate hydrolase (prostate-specific membrane antigen) 1
BIRC3	baculoviral IAP repeat containing 3
ALG10B	ALG10B, alpha-1,2-glucosyltransferase
CA8	carbonic anhydrase VIII
CSTF2T	cleavage stimulation factor, 3' pre-RNA, subunit 2, 64kDa, tau variant
SNX25	sorting nexin 25
PURA	purine-rich element binding protein A
ABCC9	ATP-binding cassette, sub-family C (CFTR/MRP), member 9
ANLN	anillin, actin binding protein
NAB1	NGFI-A binding protein 1 (EGR1 binding protein 1)
DNAJC13	DnaJ (Hsp40) homolog, subfamily C, member 13
TEX36	testis expressed 36
IFT80	intraflagellar transport 80 homolog (Chlamydomonas)
GOLT1B	golgi transport 1B
RTCA	RNA 3'-terminal phosphate cyclase
DAZL	deleted in azoospermia-like
HOMER2	homer homolog 2 (Drosophila)
PXT1	peroxisomal, testis specific 1
DOK6	docking protein 6
USP41	ubiquitin specific peptidase 41
ITGAV	integrin, alpha V
PBLD	phenazine biosynthesis-like protein domain containing
GPR1	G protein-coupled receptor 1
FAP	fibroblast activation protein, alpha
TRIM61	tripartite motif containing 61
TFEC	transcription factor EC
DAZ3	deleted in azoospermia 3
CYP26B1	cytochrome P450, family 26, subfamily B, polypeptide 1
KRTAP4-5	keratin associated protein 4-5
KIAA1279	KIAA1279
TMEM215	transmembrane protein 215
MFF	mitochondrial fission factor
DIAPH2	diaphanous-related formin 2
STON1	stonin 1
TRIM22	tripartite motif containing 22
ZCWPW2	zinc finger, CW type with PWWP domain 2
MAB21L1	mab-21-like 1 (C. elegans)
ZNF165	zinc finger protein 165
HDGFRP3	Hepatoma-derived growth factor-related protein 3
LYSMD1	LysM, putative peptidoglycan-binding, domain containing 1
SPOPL	speckle-type POZ protein-like
EVA1A	eva-1 homolog A (C. elegans)
DYNC2LI1	dynein, cytoplasmic 2, light intermediate chain 1
DNAJB14	DnaJ (Hsp40) homolog, subfamily B, member 14
NAT1	N-acetyltransferase 1 (arylamine N-acetyltransferase)
AC124890.1	HCG1774533, isoform CRA_a; PRO2268; Uncharacterized protein
MTHFD2	methylenetetrahydrofolate dehydrogenase (NADP+ dependent) 2, methenyltetrahydrofolate cyclohydrolase
ZNF804B	zinc finger protein 804B
PAK1IP1	PAK1 interacting protein 1
LIMA1	LIM domain and actin binding 1
CCL20	chemokine (C-C motif) ligand 20
FOXD4L4	forkhead box D4-like 4
C15orf65	chromosome 15 open reading frame 65
TRIM5	tripartite motif containing 5
PRKG1	protein kinase, cGMP-dependent, type I
CBWD2	COBW domain containing 2
ICK	intestinal cell (MAK-like) kinase
TARDBP	TAR DNA binding protein
SSH2	slingshot protein phosphatase 2
PAPD7	PAP associated domain containing 7
ZFX	zinc finger protein, X-linked
TMEM246	transmembrane protein 246
FPR3	formyl peptide receptor 3
RAB27B	RAB27B, member RAS oncogene family
CBWD7	COBW domain containing 7
ERC2	ELKS/RAB6-interacting/CAST family member 2
SLC2A13	solute carrier family 2 (facilitated glucose transporter), member 13
ASPN	asporin
GYPA	glycophorin A (MNS blood group)
KCTD14	potassium channel tetramerization domain containing 14
MIPOL1	mirror-image polydactyly 1
CAPN2	calpain 2, (m/II) large subunit
TEK	TEK tyrosine kinase, endothelial
LPAR1	lysophosphatidic acid receptor 1
ARL15	ADP-ribosylation factor-like 15
AL136115.1	HCG2032337; PRO1848; Uncharacterized protein
CIB4	calcium and integrin binding family member 4
BBS7	Bardet-Biedl syndrome 7
POU5F2	POU domain class 5, transcription factor 2
SV2A	synaptic vesicle glycoprotein 2A
ZFP37	ZFP37 zinc finger protein
ACVR1C	activin A receptor, type IC
SSX2IP	synovial sarcoma, X breakpoint 2 interacting protein
TMEM170B	transmembrane protein 170B
TP53BP2	tumor protein p53 binding protein, 2
BMPR1A	bone morphogenetic protein receptor, type IA
FABP2	fatty acid binding protein 2, intestinal
SCUBE1	signal peptide, CUB domain, EGF-like 1
CNTN4	contactin 4
ZDHHC15	zinc finger, DHHC-type containing 15
MTRNR2L7	MT-RNR2-like 7
SUCLG2	succinate-CoA ligase, GDP-forming, beta subunit
REEP3	receptor accessory protein 3
FBXO45	F-box protein 45
MEP1A	meprin A, alpha (PABA peptide hydrolase)
PCGF3	polycomb group ring finger 3
CXCR4	chemokine (C-X-C motif) receptor 4
HIPK1	homeodomain interacting protein kinase 1
C7orf57	chromosome 7 open reading frame 57
CCNB3	cyclin B3
SLC11A2	solute carrier family 11 (proton-coupled divalent metal ion transporter), member 2
SGIP1	SH3-domain GRB2-like (endophilin) interacting protein 1
IL33	interleukin 33
FOXB1	forkhead box B1
SCHIP1	schwannomin interacting protein 1
SUCNR1	succinate receptor 1
HOXA10	homeobox A10
OAZ1	ornithine decarboxylase antizyme 1
C2orf49	chromosome 2 open reading frame 49
MDH1B	malate dehydrogenase 1B, NAD (soluble)
C7orf61	chromosome 7 open reading frame 61
GPR63	G protein-coupled receptor 63
MTF2	metal response element binding transcription factor 2
SNX4	sorting nexin 4
IFNW1	interferon, omega 1
CBWD5	COBW domain containing 5
CBWD6	COBW domain containing 6
PGR	progesterone receptor
CBWD3	COBW domain containing 3
CBWD1	COBW domain containing 1
RGCC	regulator of cell cycle
NUP62CL	nucleoporin 62kDa C-terminal like
GABRA2	gamma-aminobutyric acid (GABA) A receptor, alpha 2
FAM173B	family with sequence similarity 173, member B
CEP44	centrosomal protein 44kDa
AEBP2	AE binding protein 2
MTX3	metaxin 3
C2orf69	chromosome 2 open reading frame 69
LHFPL3	lipoma HMGIC fusion partner-like 3
MTRNR2L6	MT-RNR2-like 6
RP11-160N1.10
FAM24A	family with sequence similarity 24, member A
TRPC3	transient receptor potential cation channel, subfamily C, member 3
MAP10	microtubule-associated protein 10
PTPN13	protein tyrosine phosphatase, non-receptor type 13 (APO-1/CD95 (Fas)-associated phosphatase)
MAP3K7CL	MAP3K7 C-terminal like
PTGS2	prostaglandin-endoperoxide synthase 2 (prostaglandin G/H synthase and cyclooxygenase)
RCN2	reticulocalbin 2, EF-hand calcium binding domain
BCMO1	beta-carotene 15,15'-monooxygenase 1
MYCT1	myc target 1
C1orf180	chromosome 1 open reading frame 180
NEK1	NIMA-related kinase 1
SCAMP1	secretory carrier membrane protein 1
IL23A	interleukin 23, alpha subunit p19
HMGN5	high mobility group nucleosome binding domain 5
OCIAD1	OCIA domain containing 1
C17orf112	chromosome 17 open reading frame 112
RAB11FIP2	RAB11 family interacting protein 2 (class I)
CCDC71L	coiled-coil domain containing 71-like
HELT	helt bHLH transcription factor
AKIRIN1	akirin 1
ANKRD36	ankyrin repeat domain 36
CLDN12	claudin 12
GPR65	G protein-coupled receptor 65
LLGL1	lethal giant larvae homolog 1 (Drosophila)
HRASLS	HRAS-like suppressor
RP11-169F17.1	Protein LOC400655
PRG4	proteoglycan 4
SEMA3E	sema domain, immunoglobulin domain (Ig), short basic domain, secreted, (semaphorin) 3E
IRF6	interferon regulatory factor 6
ZNF488	zinc finger protein 488
AL354993.1	Cell growth-inhibiting protein 7; HCG1784586; Uncharacterized protein
BIVM	basic, immunoglobulin-like variable motif containing
TNFSF4	tumor necrosis factor (ligand) superfamily, member 4
F3	coagulation factor III (thromboplastin, tissue factor)
FER	fer (fps/fes related) tyrosine kinase
HSD17B12	hydroxysteroid (17-beta) dehydrogenase 12
UBE2A	ubiquitin-conjugating enzyme E2A
LRRCC1	leucine rich repeat and coiled-coil centrosomal protein 1
SIRT5	sirtuin 5
USP13	ubiquitin specific peptidase 13 (isopeptidase T-3)
TRIP11	thyroid hormone receptor interactor 11
RNF128	ring finger protein 128, E3 ubiquitin protein ligase
CRHBP	corticotropin releasing hormone binding protein
ELOVL2	ELOVL fatty acid elongase 2
ICA1L	islet cell autoantigen 1,69kDa-like
MTX2	metaxin 2
ZNF140	zinc finger protein 140
MRPL2	mitochondrial ribosomal protein L2
ZNF655	zinc finger protein 655
TRNP1	TMF1-regulated nuclear protein 1
PLCXD3	phosphatidylinositol-specific phospholipase C, X domain containing 3
HMGN3	high mobility group nucleosomal binding domain 3
TFRC	transferrin receptor
EFCAB6	EF-hand calcium binding domain 6
ZNF292	zinc finger protein 292
MTRNR2L10	MT-RNR2-like 10
PPP4R2	protein phosphatase 4, regulatory subunit 2
CCDC38	coiled-coil domain containing 38
UBE2V2	ubiquitin-conjugating enzyme E2 variant 2
MITD1	MIT, microtubule interacting and transport, domain containing 1
CCNC	cyclin C
CDK6	cyclin-dependent kinase 6
PLAUR	plasminogen activator, urokinase receptor
SNRNP27	small nuclear ribonucleoprotein 27kDa (U4/U6.U5)
KIF3A	kinesin family member 3A
TRH	thyrotropin-releasing hormone
C8orf37	chromosome 8 open reading frame 37
KCTD6	potassium channel tetramerization domain containing 6
ITLN1	intelectin 1 (galactofuranose binding)
GJB2	gap junction protein, beta 2, 26kDa
MMGT1	membrane magnesium transporter 1
HIPK3	homeodomain interacting protein kinase 3
MSI2	musashi RNA-binding protein 2
RFK	riboflavin kinase
BIRC2	baculoviral IAP repeat containing 2
CRISP1	cysteine-rich secretory protein 1
BBS10	Bardet-Biedl syndrome 10
NSF	N-ethylmaleimide-sensitive factor
CISD2	CDGSH iron sulfur domain 2
CXADR	coxsackie virus and adenovirus receptor
ZNF830	zinc finger protein 830
MANEA	mannosidase, endo-alpha
SOCS4	suppressor of cytokine signaling 4
FAM181B	family with sequence similarity 181, member B
KDM1B	lysine (K)-specific demethylase 1B
EDDM3A	epididymal protein 3A
AP1AR	adaptor-related protein complex 1 associated regulatory protein
IQCJ-SCHIP1	IQCJ-SCHIP1 readthrough
POU3F3	POU class 3 homeobox 3
SLC26A7	solute carrier family 26 (anion exchanger), member 7
LUZP6	leucine zipper protein 6
SPRTN	SprT-like N-terminal domain
C20orf197	chromosome 20 open reading frame 197
LRRC4	leucine rich repeat containing 4
B4GALT6	UDP-Gal:betaGlcNAc beta 1,4- galactosyltransferase, polypeptide 6
AC093677.1	Uncharacterized protein
POLR2M	polymerase (RNA) II (DNA directed) polypeptide M
C11orf87	chromosome 11 open reading frame 87
BCKDHB	branched chain keto acid dehydrogenase E1, beta polypeptide
ZNF260	zinc finger protein 260
RGMB	RGM domain family, member B
FAM183B	family with sequence similarity 183, member B
GINS1	GINS complex subunit 1 (Psf1 homolog)
RAB30	RAB30, member RAS oncogene family
KLHL4	kelch-like family member 4
ERGIC2	ERGIC and golgi 2
ENTHD1	ENTH domain containing 1
RAB39B	RAB39B, member RAS oncogene family
AP4E1	adaptor-related protein complex 4, epsilon 1 subunit
MBIP	MAP3K12 binding inhibitory protein 1
RGS13	regulator of G-protein signaling 13
TMEM165	transmembrane protein 165
ZNF800	zinc finger protein 800
EIF2S3	eukaryotic translation initiation factor 2, subunit 3 gamma, 52kDa
ZNF397	zinc finger protein 397
TTC27	tetratricopeptide repeat domain 27
PUS7L	pseudouridylate synthase 7 homolog (S. cerevisiae)-like
PGAP1	post-GPI attachment to proteins 1
ZNF430	zinc finger protein 430
TTC39B	tetratricopeptide repeat domain 39B
TAF1D	TATA box binding protein (TBP)-associated factor, RNA polymerase I, D, 41kDa
INSL5	insulin-like 5
TMLHE	trimethyllysine hydroxylase, epsilon
IRF8	interferon regulatory factor 8
DUSP2	dual specificity phosphatase 2
RP1-170O19.20	Uncharacterized protein
CPEB2	cytoplasmic polyadenylation element binding protein 2
PLA2G4D	phospholipase A2, group IVD (cytosolic)
NAIP	NLR family, apoptosis inhibitory protein
JHDM1D	jumonji C domain containing histone demethylase 1 homolog D (S. cerevisiae)
TMEM33	transmembrane protein 33
CLUL1	clusterin-like 1 (retinal)
EFEMP1	EGF containing fibulin-like extracellular matrix protein 1
TMEM161B	transmembrane protein 161B
SFPQ	splicing factor proline/glutamine-rich
DNAJC19	DnaJ (Hsp40) homolog, subfamily C, member 19
NEGR1	neuronal growth regulator 1
ZNF429	zinc finger protein 429
LMAN1	lectin, mannose-binding, 1
C8orf34	chromosome 8 open reading frame 34
RTP4	receptor (chemosensory) transporter protein 4
TIA1	TIA1 cytotoxic granule-associated RNA binding protein
DCAF8L1	DDB1 and CUL4 associated factor 8-like 1
GLS	glutaminase
RP11-47I22.4
KLF10	Kruppel-like factor 10
TBC1D30	TBC1 domain family, member 30
AC007375.1	Uncharacterized protein; cDNA FLJ43210 fis, clone FEBRA2020582
MLF1	myeloid leukemia factor 1
CD226	CD226 molecule
PAQR3	progestin and adipoQ receptor family member III
ZNF117	zinc finger protein 117
EBAG9	estrogen receptor binding site associated, antigen, 9
TRMT61B	tRNA methyltransferase 61 homolog B (S. cerevisiae)
CCL13	chemokine (C-C motif) ligand 13
NEK7	NIMA-related kinase 7
AMER2	APC membrane recruitment protein 2
SEMA5A	sema domain, seven thrombospondin repeats (type 1 and type 1-like), transmembrane domain (TM) and short cytoplasmic domain, (semaphorin) 5A
IQCH	IQ motif containing H
TMEM30A	transmembrane protein 30A
EPM2AIP1	EPM2A (laforin) interacting protein 1
KBTBD3	kelch repeat and BTB (POZ) domain containing 3
USP45	ubiquitin specific peptidase 45
NHLRC2	NHL repeat containing 2
SMIM10	small integral membrane protein 10
PPP1R14B	protein phosphatase 1, regulatory (inhibitor) subunit 14B
TPO	thyroid peroxidase
TMEM41B	transmembrane protein 41B
SLC35D3	solute carrier family 35, member D3
CNTN1	contactin 1
DCLK1	doublecortin-like kinase 1
PSMD10	proteasome (prosome, macropain) 26S subunit, non-ATPase, 10
RP11-187E13.1	Uncharacterized protein
IL31	interleukin 31
OLFM3	olfactomedin 3
ZDHHC2	zinc finger, DHHC-type containing 2
CRY1	cryptochrome 1 (photolyase-like)
PRKRIR	protein-kinase, interferon-inducible double stranded RNA dependent inhibitor, repressor of (P58 repressor)
POLR1B	polymerase (RNA) I polypeptide B, 128kDa
SLC30A9	solute carrier family 30 (zinc transporter), member 9
TMEM50A	transmembrane protein 50A
SPATA6	spermatogenesis associated 6
RGS4	regulator of G-protein signaling 4
GAS2	growth arrest-specific 2
UPRT	uracil phosphoribosyltransferase (FUR1) homolog (S. cerevisiae)
LRCH1	leucine-rich repeats and calponin homology (CH) domain containing 1
KISS1R	KISS1 receptor
GCG	glucagon
HBG1	hemoglobin, gamma A
RFESD	Rieske (Fe-S) domain containing
TMC5	transmembrane channel-like 5
MTERFD1	MTERF domain containing 1
ST6GAL1	ST6 beta-galactosamide alpha-2,6-sialyltranferase 1
STAG2	stromal antigen 2
HOXA9	homeobox A9
POLR3G	polymerase (RNA) III (DNA directed) polypeptide G (32kD)
C1orf110	chromosome 1 open reading frame 110
PABPC4L	poly(A) binding protein, cytoplasmic 4-like
STARD3NL	STARD3 N-terminal like
CHIC1	cysteine-rich hydrophobic domain 1
SLC38A4	solute carrier family 38, member 4
FNDC1	fibronectin type III domain containing 1
TSHZ2	teashirt zinc finger homeobox 2
SRBD1	S1 RNA binding domain 1
NR5A2	nuclear receptor subfamily 5, group A, member 2
DARS	aspartyl-tRNA synthetase
CAPN7	calpain 7
FGFR1OP	FGFR1 oncogene partner
SP8	Sp8 transcription factor
HIST1H2BH	histone cluster 1, H2bh
C11orf44	chromosome 11 open reading frame 44
TMEM66	transmembrane protein 66
HSPA5	heat shock 70kDa protein 5 (glucose-regulated protein, 78kDa)
CLHC1	clathrin heavy chain linker domain containing 1
ATF3	activating transcription factor 3
ZNF280D	zinc finger protein 280D
SLC5A7	solute carrier family 5 (sodium/choline cotransporter), member 7
DPP10	dipeptidyl-peptidase 10 (non-functional)
OR5T1	olfactory receptor, family 5, subfamily T, member 1
MEIS1	Meis homeobox 1
TDGF1	teratocarcinoma-derived growth factor 1
MLX	MLX, MAX dimerization protein
GTF2A1	general transcription factor IIA, 1, 19/37kDa
BLOC1S2	biogenesis of lysosomal organelles complex-1, subunit 2
TMEM187	transmembrane protein 187
URM1	ubiquitin related modifier 1
NR2E1	nuclear receptor subfamily 2, group E, member 1
HPN	hepsin
C3orf33	chromosome 3 open reading frame 33
HLTF	helicase-like transcription factor
MPC1	mitochondrial pyruvate carrier 1
C10orf67	chromosome 10 open reading frame 67
ARSK	arylsulfatase family, member K
MADCAM1	mucosal vascular addressin cell adhesion molecule 1
SLC35A3	solute carrier family 35 (UDP-N-acetylglucosamine (UDP-GlcNAc) transporter), member A3
MEGF9	multiple EGF-like-domains 9
ATF7IP	activating transcription factor 7 interacting protein
EYA4	eyes absent homolog 4 (Drosophila)
BRI3BP	BRI3 binding protein
LARP1B	La ribonucleoprotein domain family, member 1B
MTMR9	myotubularin related protein 9
FOXD4L2	forkhead box D4-like 2
GPR27	G protein-coupled receptor 27
MAN2B2	mannosidase, alpha, class 2B, member 2
S100A7A	S100 calcium binding protein A7A
GFRAL	GDNF family receptor alpha like
ZNF518B	zinc finger protein 518B
ISOC1	isochorismatase domain containing 1
RBM47	RNA binding motif protein 47
UGP2	UDP-glucose pyrophosphorylase 2
CDK17	cyclin-dependent kinase 17
ZSCAN5A	zinc finger and SCAN domain containing 5A
COL23A1	collagen, type XXIII, alpha 1
LGSN	lengsin, lens protein with glutamine synthetase domain
CMTM6	CKLF-like MARVEL transmembrane domain containing 6
ANKAR	ankyrin and armadillo repeat containing
NPY1R	neuropeptide Y receptor Y1
GCOM1	GRINL1A complex locus 1
PTER	phosphotriesterase related
YY1	YY1 transcription factor
SCLT1	sodium channel and clathrin linker 1
THSD7A	thrombospondin, type I, domain containing 7A
AICDA	activation-induced cytidine deaminase
OXR1	oxidation resistance 1
TNPO1	transportin 1
TSC22D3	TSC22 domain family, member 3
FILIP1	filamin A interacting protein 1
YBX3	Y box binding protein 3
DUS4L	dihydrouridine synthase 4-like (S. cerevisiae)
UBD	ubiquitin D
TRAPPC3L	trafficking protein particle complex 3-like
ZUFSP	zinc finger with UFM1-specific peptidase domain
ZNF616	zinc finger protein 616
KLF11	Kruppel-like factor 11
ZBTB44	zinc finger and BTB domain containing 44
ALOX15	arachidonate 15-lipoxygenase
LRIG1	leucine-rich repeats and immunoglobulin-like domains 1
FAM110C	family with sequence similarity 110, member C
FMO5	flavin containing monooxygenase 5
CNTNAP3B	contactin associated protein-like 3B
EIF5AL1	eukaryotic translation initiation factor 5A-like 1
TAS2R13	taste receptor, type 2, member 13
AC008948.1
FBXO3	F-box protein 3
MYC	v-myc avian myelocytomatosis viral oncogene homolog
TMEM182	transmembrane protein 182
HOXD13	homeobox D13
TMPRSS12	transmembrane (C-terminal) protease, serine 12
UGT2B10	UDP glucuronosyltransferase 2 family, polypeptide B10
ABI3BP	ABI family, member 3 (NESH) binding protein
MRI1	methylthioribose-1-phosphate isomerase 1
CALCB	calcitonin-related polypeptide beta
DACT1	dishevelled-binding antagonist of beta-catenin 1
MSTO1	misato 1, mitochondrial distribution and morphology regulator
UFL1	UFM1-specific ligase 1
ABCB10	ATP-binding cassette, sub-family B (MDR/TAP), member 10
SNTG2	syntrophin, gamma 2
TAF1A	TATA box binding protein (TBP)-associated factor, RNA polymerase I, A, 48kDa
TMEM185B	transmembrane protein 185B
CYB561A3	cytochrome b561 family, member A3
RNPC3	RNA-binding region (RNP1, RRM) containing 3
ZNF599	zinc finger protein 599
ANGPTL7	angiopoietin-like 7
DGKB	diacylglycerol kinase, beta 90kDa
HIVEP1	human immunodeficiency virus type I enhancer binding protein 1
ITPRIPL2	inositol 1,4,5-trisphosphate receptor interacting protein-like 2
PTAR1	protein prenyltransferase alpha subunit repeat containing 1
GDF5	growth differentiation factor 5
RAB38	RAB38, member RAS oncogene family
SSU72	SSU72 RNA polymerase II CTD phosphatase homolog (S. cerevisiae)
ZNF254	zinc finger protein 254
COBLL1	cordon-bleu WH2 repeat protein-like 1
N4BP1	NEDD4 binding protein 1
LIN7C	lin-7 homolog C (C. elegans)
TTBK2	tau tubulin kinase 2
LYRM2	LYR motif containing 2
TTC32	tetratricopeptide repeat domain 32
C1orf21	chromosome 1 open reading frame 21
ZNF704	zinc finger protein 704
RCHY1	ring finger and CHY zinc finger domain containing 1, E3 ubiquitin protein ligase
CTSO	cathepsin O
CCDC90B	coiled-coil domain containing 90B
EDN1	endothelin 1
WISP3	WNT1 inducible signaling pathway protein 3
MAPK1IP1L	mitogen-activated protein kinase 1 interacting protein 1-like
DTWD2	DTW domain containing 2
POLK	polymerase (DNA directed) kappa
IRAK1BP1	interleukin-1 receptor-associated kinase 1 binding protein 1
FAM150A	family with sequence similarity 150, member A
PLSCR4	phospholipid scramblase 4
RAD54B	RAD54 homolog B (S. cerevisiae)
KIAA0825	KIAA0825
PRRG1	proline rich Gla (G-carboxyglutamic acid) 1
CDH8	cadherin 8, type 2
PRND	prion protein 2 (dublet)
TRIM17	tripartite motif containing 17
ZNF770	zinc finger protein 770
NUP43	nucleoporin 43kDa
C9orf47	chromosome 9 open reading frame 47
KCNG3	potassium voltage-gated channel, subfamily G, member 3
MSR1	macrophage scavenger receptor 1
TAF15	TAF15 RNA polymerase II, TATA box binding protein (TBP)-associated factor, 68kDa
RPL3L	ribosomal protein L3-like
FAM217B	family with sequence similarity 217, member B
PDZD8	PDZ domain containing 8
ETV1	ets variant 1
INHBA	inhibin, beta A
AGL	amylo-alpha-1, 6-glucosidase, 4-alpha-glucanotransferase
BHLHB9	basic helix-loop-helix domain containing, class B, 9
GABRA1	gamma-aminobutyric acid (GABA) A receptor, alpha 1
IFNG	interferon, gamma
TTC29	tetratricopeptide repeat domain 29
GPR151	G protein-coupled receptor 151
OSM	oncostatin M
LTBP1	latent transforming growth factor beta binding protein 1
ZNF423	zinc finger protein 423
C4orf45	chromosome 4 open reading frame 45
PLEKHH2	pleckstrin homology domain containing, family H (with MyTH4 domain) member 2
RND3	Rho family GTPase 3
CDS1	CDP-diacylglycerol synthase (phosphatidate cytidylyltransferase) 1
UGT2B4	UDP glucuronosyltransferase 2 family, polypeptide B4
CPB1	carboxypeptidase B1 (tissue)
PARD6G	par-6 family cell polarity regulator gamma
RP11-706O15.1	HCG1981372, isoform CRA_c; Uncharacterized protein
THEMIS	thymocyte selection associated
MCPH1	microcephalin 1
FAM49B	family with sequence similarity 49, member B
FGF2	fibroblast growth factor 2 (basic)
SRSF10	serine/arginine-rich splicing factor 10
CNOT6	CCR4-NOT transcription complex, subunit 6
MUSK	muscle, skeletal, receptor tyrosine kinase
CNTNAP3	contactin associated protein-like 3
MPPED2	metallophosphoesterase domain containing 2
CNEP1R1	CTD nuclear envelope phosphatase 1 regulatory subunit 1
PDLIM5	PDZ and LIM domain 5
MYEF2	myelin expression factor 2
KCNMB1	potassium large conductance calcium-activated channel, subfamily M, beta member 1
NMUR2	neuromedin U receptor 2
FKTN	fukutin
PTPRZ1	protein tyrosine phosphatase, receptor-type, Z polypeptide 1
SIM1	single-minded homolog 1 (Drosophila)
FAT3	FAT atypical cadherin 3
DLG2	discs, large homolog 2 (Drosophila)
INPP5E	inositol polyphosphate-5-phosphatase, 72 kDa
UBE2D1	ubiquitin-conjugating enzyme E2D 1
ACTN1	actinin, alpha 1
FECH	ferrochelatase
ARMCX5	armadillo repeat containing, X-linked 5
TMEM155	transmembrane protein 155
CTHRC1	collagen triple helix repeat containing 1
RGS7BP	regulator of G-protein signaling 7 binding protein
PHKB	phosphorylase kinase, beta
FAM135A	family with sequence similarity 135, member A
ZNF479	zinc finger protein 479
HIF1A	hypoxia inducible factor 1, alpha subunit (basic helix-loop-helix transcription factor)
SERPINB9	serpin peptidase inhibitor, clade B (ovalbumin), member 9
HMGCS2	3-hydroxy-3-methylglutaryl-CoA synthase 2 (mitochondrial)
EFTUD1	elongation factor Tu GTP binding domain containing 1
NANP	N-acetylneuraminic acid phosphatase
KCNN3	potassium intermediate/small conductance calcium-activated channel, subfamily N, member 3
C3orf58	chromosome 3 open reading frame 58
TUBAL3	tubulin, alpha-like 3
DCAF4	DDB1 and CUL4 associated factor 4
HOXA5	homeobox A5
UNC13C	unc-13 homolog C (C. elegans)
ZFP36	ZFP36 ring finger protein
FZD3	frizzled family receptor 3
ACKR3	atypical chemokine receptor 3
CAMK1D	calcium/calmodulin-dependent protein kinase ID
BDP1	B double prime 1, subunit of RNA polymerase III transcription initiation factor IIIB
BDNF	brain-derived neurotrophic factor
GSTCD	glutathione S-transferase, C-terminal domain containing
PPP3R1	protein phosphatase 3, regulatory subunit B, alpha
ANP32E	acidic (leucine-rich) nuclear phosphoprotein 32 family, member E
PTPN14	protein tyrosine phosphatase, non-receptor type 14
MAP3K5	mitogen-activated protein kinase kinase kinase 5
PPP1R3D	protein phosphatase 1, regulatory subunit 3D
PCDH18	protocadherin 18
CSN1S1	casein alpha s1
CLNK	cytokine-dependent hematopoietic cell linker
MAFF	v-maf avian musculoaponeurotic fibrosarcoma oncogene homolog F
CXorf30	chromosome X open reading frame 30
SEMA4C	sema domain, immunoglobulin domain (Ig), transmembrane domain (TM) and short cytoplasmic domain, (semaphorin) 4C
VSIG1	V-set and immunoglobulin domain containing 1
CDCP2	CUB domain containing protein 2
RP11-455G16.1	Uncharacterized protein
TMX3	thioredoxin-related transmembrane protein 3
KLF5	Kruppel-like factor 5 (intestinal)
SMAGP	small cell adhesion glycoprotein
NEDD1	neural precursor cell expressed, developmentally down-regulated 1
NALCN	sodium leak channel, non-selective
SNX18	sorting nexin 18
OPN5	opsin 5
AL162407.1	CDNA FLJ20147 fis, clone COL07954; HCG1781466; Uncharacterized protein
GDI2	GDP dissociation inhibitor 2
C15orf48	chromosome 15 open reading frame 48
ACTR3B	ARP3 actin-related protein 3 homolog B (yeast)
HADHB	hydroxyacyl-CoA dehydrogenase/3-ketoacyl-CoA thiolase/enoyl-CoA hydratase (trifunctional protein), beta subunit
HIST1H2BF	histone cluster 1, H2bf
DOPEY1	dopey family member 1
MAN1A2	mannosidase, alpha, class 1A, member 2
FRMD3	FERM domain containing 3
BRPF1	bromodomain and PHD finger containing, 1
KCNJ3	potassium inwardly-rectifying channel, subfamily J, member 3
SLC39A9	solute carrier family 39, member 9
THAP1	THAP domain containing, apoptosis associated protein 1
CCDC14	coiled-coil domain containing 14
NADK2	NAD kinase 2, mitochondrial
GABPA	GA binding protein transcription factor, alpha subunit 60kDa
C2orf80	chromosome 2 open reading frame 80
FABP7	fatty acid binding protein 7, brain
GAPVD1	GTPase activating protein and VPS9 domains 1
PCBD2	pterin-4 alpha-carbinolamine dehydratase/dimerization cofactor of hepatocyte nuclear factor 1 alpha (TCF1) 2
STRN	striatin, calmodulin binding protein
ZCCHC24	zinc finger, CCHC domain containing 24
ZBTB8B	zinc finger and BTB domain containing 8B
MORC1	MORC family CW-type zinc finger 1
FAM171B	family with sequence similarity 171, member B
CD40	CD40 molecule, TNF receptor superfamily member 5
ATP2C1	ATPase, Ca++ transporting, type 2C, member 1
LIPA	lipase A, lysosomal acid, cholesterol esterase
FANCF	Fanconi anemia, complementation group F
MOB1A	MOB kinase activator 1A
BAG2	BCL2-associated athanogene 2
KCNMB2	potassium large conductance calcium-activated channel, subfamily M, beta member 2
ANXA7	annexin A7
PDGFC	platelet derived growth factor C
ORMDL1	ORM1-like 1 (S. cerevisiae)
KLHL5	kelch-like family member 5
MCMBP	minichromosome maintenance complex binding protein
TFPI	tissue factor pathway inhibitor (lipoprotein-associated coagulation inhibitor)
ZFP30	ZFP30 zinc finger protein
NFIL3	nuclear factor, interleukin 3 regulated
SDIM1	stress responsive DNAJB4 interacting membrane protein 1
SPCS2	signal peptidase complex subunit 2 homolog (S. cerevisiae)
ZNF624	zinc finger protein 624
SSR3	signal sequence receptor, gamma (translocon-associated protein gamma)
GPATCH4	G patch domain containing 4
GNAI1	guanine nucleotide binding protein (G protein), alpha inhibiting activity polypeptide 1
GTPBP8	GTP-binding protein 8 (putative)
HECA	headcase homolog (Drosophila)
PFN2	profilin 2
C2orf88	chromosome 2 open reading frame 88
LRRC66	leucine rich repeat containing 66
IYD	iodotyrosine deiodinase
RAI2	retinoic acid induced 2
CD33	CD33 molecule
SERF1A	small EDRK-rich factor 1A (telomeric)
SERF1B	small EDRK-rich factor 1B (centromeric)
PCLO	piccolo presynaptic cytomatrix protein
TCP11L1	t-complex 11, testis-specific-like 1
KRTAP6-1	keratin associated protein 6-1
PGRMC2	progesterone receptor membrane component 2
LRRD1	leucine-rich repeats and death domain containing 1
RIT1	Ras-like without CAAX 1
CD109	CD109 molecule
ZNF207	zinc finger protein 207
CTGF	connective tissue growth factor
ASB11	ankyrin repeat and SOCS box containing 11
AC008132.1	Uncharacterized protein
NAPEPLD	N-acyl phosphatidylethanolamine phospholipase D
LRRC2	leucine rich repeat containing 2
BCDIN3D	BCDIN3 domain containing
TSPAN8	tetraspanin 8
FAM126B	family with sequence similarity 126, member B
SP9	Sp9 transcription factor
ADAM17	ADAM metallopeptidase domain 17
GNG2	guanine nucleotide binding protein (G protein), gamma 2
CD164	CD164 molecule, sialomucin
SLC9A4	solute carrier family 9, subfamily A (NHE4, cation proton antiporter 4), member 4
GCNT2	glucosaminyl (N-acetyl) transferase 2, I-branching enzyme (I blood group)
DUSP18	dual specificity phosphatase 18
NUDCD2	NudC domain containing 2
SLC9B2	solute carrier family 9, subfamily B (NHA2, cation proton antiporter 2), member 2
GNAS	GNAS complex locus
GJB6	gap junction protein, beta 6, 30kDa
TDRP	testis development related protein
NCAPG2	non-SMC condensin II complex, subunit G2
INO80D	INO80 complex subunit D
TM9SF3	transmembrane 9 superfamily member 3
YES1	v-yes-1 Yamaguchi sarcoma viral oncogene homolog 1
INPP1	inositol polyphosphate-1-phosphatase
OR11A1	olfactory receptor, family 11, subfamily A, member 1
ALDH1A2	aldehyde dehydrogenase 1 family, member A2
PHLPP1	PH domain and leucine rich repeat protein phosphatase 1
ELSPBP1	epididymal sperm binding protein 1
ZNF43	zinc finger protein 43
CBR4	carbonyl reductase 4
MAP3K2	mitogen-activated protein kinase kinase kinase 2
PALM2	paralemmin 2
LTF	lactotransferrin
HORMAD2	HORMA domain containing 2
L2HGDH	L-2-hydroxyglutarate dehydrogenase
GJD2	gap junction protein, delta 2, 36kDa
MLTK	Mitogen-activated protein kinase kinase kinase MLT
WDR41	WD repeat domain 41
ALS2CR11	amyotrophic lateral sclerosis 2 (juvenile) chromosome region, candidate 11
RPIA	ribose 5-phosphate isomerase A
DPYD	dihydropyrimidine dehydrogenase
SPRY1	sprouty homolog 1, antagonist of FGF signaling (Drosophila)
DBR1	debranching RNA lariats 1
NR4A1	nuclear receptor subfamily 4, group A, member 1
P2RY1	purinergic receptor P2Y, G-protein coupled, 1
CBX4	chromobox homolog 4
ZNF284	zinc finger protein 284
CRISPLD1	cysteine-rich secretory protein LCCL domain containing 1
LMBRD2	LMBR1 domain containing 2
IAPP	islet amyloid polypeptide
ZNF146	zinc finger protein 146
INPP5A	inositol polyphosphate-5-phosphatase, 40kDa
DGKE	diacylglycerol kinase, epsilon 64kDa
DSN1	DSN1, MIS12 kinetochore complex component
MRPL42	mitochondrial ribosomal protein L42
PDE10A	phosphodiesterase 10A
PCNX	pecanex homolog (Drosophila)
RASSF8	Ras association (RalGDS/AF-6) domain family (N-terminal) member 8
TARBP2	TAR (HIV-1) RNA binding protein 2
TMEM167B	transmembrane protein 167B
PRCP	prolylcarboxypeptidase (angiotensinase C)
SLFN5	schlafen family member 5
HIGD1A	HIG1 hypoxia inducible domain family, member 1A
FSBP	fibrinogen silencer binding protein
RAB33B	RAB33B, member RAS oncogene family
PRLR	prolactin receptor
ZNF534	zinc finger protein 534
TMPRSS11A	transmembrane protease, serine 11A
AKAP11	A kinase (PRKA) anchor protein 11
HES2	hairy and enhancer of split 2 (Drosophila)
AHCTF1	AT hook containing transcription factor 1
REL	v-rel avian reticuloendotheliosis viral oncogene homolog
CYBB	cytochrome b-245, beta polypeptide
TSHZ1	teashirt zinc finger homeobox 1
CORO1C	coronin, actin binding protein, 1C
SCAPER	S-phase cyclin A-associated protein in the ER
SLC4A7	solute carrier family 4, sodium bicarbonate cotransporter, member 7
CNOT7	CCR4-NOT transcription complex, subunit 7
PABPC5	poly(A) binding protein, cytoplasmic 5
COX18	COX18 cytochrome C oxidase assembly factor
IFIT2	interferon-induced protein with tetratricopeptide repeats 2
SETD2	SET domain containing 2
ZCCHC11	zinc finger, CCHC domain containing 11
CCDC50	coiled-coil domain containing 50
IL24	interleukin 24
PTGER4	prostaglandin E receptor 4 (subtype EP4)
UBA5	ubiquitin-like modifier activating enzyme 5
RAB22A	RAB22A, member RAS oncogene family
C4orf32	chromosome 4 open reading frame 32
PXK	PX domain containing serine/threonine kinase
AVPR1A	arginine vasopressin receptor 1A
CX3CR1	chemokine (C-X3-C motif) receptor 1
CDH11	cadherin 11, type 2, OB-cadherin (osteoblast)
FAM215A	family with sequence similarity 215, member A (non-protein coding)
CMPK2	cytidine monophosphate (UMP-CMP) kinase 2, mitochondrial
SARNP	SAP domain containing ribonucleoprotein
HPRT1	hypoxanthine phosphoribosyltransferase 1
ZNF420	zinc finger protein 420
ABCA10	ATP-binding cassette, sub-family A (ABC1), member 10
SACM1L	SAC1 suppressor of actin mutations 1-like (yeast)
ASH2L	ash2 (absent, small, or homeotic)-like (Drosophila)
PSPH	phosphoserine phosphatase
FBLIM1	filamin binding LIM protein 1
C5orf27	chromosome 5 open reading frame 27
MTHFD2L	methylenetetrahydrofolate dehydrogenase (NADP+ dependent) 2-like
NRAS	neuroblastoma RAS viral (v-ras) oncogene homolog
C2orf76	chromosome 2 open reading frame 76
TXNDC16	thioredoxin domain containing 16
PTPN2	protein tyrosine phosphatase, non-receptor type 2
SEC24A	SEC24 family, member A (S. cerevisiae)
RNF141	ring finger protein 141
AMIGO2	adhesion molecule with Ig-like domain 2
ACAP2	ArfGAP with coiled-coil, ankyrin repeat and PH domains 2
JUNB	jun B proto-oncogene
PKD2	polycystic kidney disease 2 (autosomal dominant)
RNF111	ring finger protein 111
MIA2	melanoma inhibitory activity 2
CD177	CD177 molecule
ZNF41	zinc finger protein 41
ATP13A3	ATPase type 13A3
PDK1	pyruvate dehydrogenase kinase, isozyme 1
SERP1	stress-associated endoplasmic reticulum protein 1
ACTR3	ARP3 actin-related protein 3 homolog (yeast)
RP11-366L20.2	Uncharacterized protein
PCDH7	protocadherin 7
CMKLR1	chemokine-like receptor 1
MRPL48	mitochondrial ribosomal protein L48
SLC38A2	solute carrier family 38, member 2
NIPA2	non imprinted in Prader-Willi/Angelman syndrome 2
NRIP1	nuclear receptor interacting protein 1
GEN1	GEN1 Holliday junction 5' flap endonuclease
MBD5	methyl-CpG binding domain protein 5
SNRPE	small nuclear ribonucleoprotein polypeptide E
QTRTD1	queuine tRNA-ribosyltransferase domain containing 1
EMB	embigin
PDIK1L	PDLIM1 interacting kinase 1 like
SLC12A1	solute carrier family 12 (sodium/potassium/chloride transporter), member 1
GPR15	G protein-coupled receptor 15
ZNF141	zinc finger protein 141
ETF1	eukaryotic translation termination factor 1
UBE2N	ubiquitin-conjugating enzyme E2N
STAM	signal transducing adaptor molecule (SH3 domain and ITAM motif) 1
RPS6KA6	ribosomal protein S6 kinase, 90kDa, polypeptide 6
DONSON	downstream neighbor of SON
PARM1	prostate androgen-regulated mucin-like protein 1
CCBE1	collagen and calcium binding EGF domains 1
CD58	CD58 molecule
AGR2	anterior gradient 2
RSPH3	radial spoke 3 homolog (Chlamydomonas)
MAGOHB	mago-nashi homolog B (Drosophila)
TGDS	TDP-glucose 4,6-dehydratase
OLFML2B	olfactomedin-like 2B
CCDC102B	coiled-coil domain containing 102B
CUL4A	cullin 4A
ANKRD10	ankyrin repeat domain 10
AMACR	alpha-methylacyl-CoA racemase
TRAM1	translocation associated membrane protein 1
PHLDB2	pleckstrin homology-like domain, family B, member 2
ZBTB24	zinc finger and BTB domain containing 24
PKHD1	polycystic kidney and hepatic disease 1 (autosomal recessive)
CYYR1	cysteine/tyrosine-rich 1
MS4A14	membrane-spanning 4-domains, subfamily A, member 14
YPEL2	yippee-like 2 (Drosophila)
ZNF736	zinc finger protein 736
MBTD1	mbt domain containing 1
C13orf35	chromosome 13 open reading frame 35
BNIP3	BCL2/adenovirus E1B 19kDa interacting protein 3
ANGPT1	angiopoietin 1
RABGEF1	RAB guanine nucleotide exchange factor (GEF) 1
ZNF597	zinc finger protein 597
PKHD1L1	polycystic kidney and hepatic disease 1 (autosomal recessive)-like 1
ESRRG	estrogen-related receptor gamma
PLXDC2	plexin domain containing 2
FMO2	flavin containing monooxygenase 2 (non-functional)
ZNF780B	zinc finger protein 780B
EIF3F	eukaryotic translation initiation factor 3, subunit F
KCTD15	potassium channel tetramerization domain containing 15
CERS3	ceramide synthase 3
COL10A1	collagen, type X, alpha 1
ATE1	arginyltransferase 1
COIL	coilin
PCDHB3	protocadherin beta 3
CCDC141	coiled-coil domain containing 141
SLC6A11	solute carrier family 6 (neurotransmitter transporter), member 11
BMP4	bone morphogenetic protein 4
EPB41L4A-AS2	EPB41L4A antisense RNA 2 (head to head)
BCL2L11	BCL2-like 11 (apoptosis facilitator)
RPP14	ribonuclease P/MRP 14kDa subunit
EIF1AX	eukaryotic translation initiation factor 1A, X-linked
RP11-156E8.1
STX7	syntaxin 7
PRRX1	paired related homeobox 1
DCUN1D1	DCN1, defective in cullin neddylation 1, domain containing 1
METTL15	methyltransferase like 15
NR1D2	nuclear receptor subfamily 1, group D, member 2
NSMCE2	non-SMC element 2, MMS21 homolog (S. cerevisiae)
CHN1	chimerin 1
CREB1	cAMP responsive element binding protein 1
ZNF721	zinc finger protein 721
SERPINB5	serpin peptidase inhibitor, clade B (ovalbumin), member 5
FAM206A	family with sequence similarity 206, member A
ALDH1A3	aldehyde dehydrogenase 1 family, member A3
CDO1	cysteine dioxygenase type 1
RABGAP1L	RAB GTPase activating protein 1-like
GRIA2	glutamate receptor, ionotropic, AMPA 2
ZNF85	zinc finger protein 85
TFAP2A	transcription factor AP-2 alpha (activating enhancer binding protein 2 alpha)
SLC25A46	solute carrier family 25, member 46
PCGF5	polycomb group ring finger 5
SLITRK6	SLIT and NTRK-like family, member 6
METTL6	methyltransferase like 6
SLC13A1	solute carrier family 13 (sodium/sulfate symporter), member 1
PAFAH1B1	platelet-activating factor acetylhydrolase 1b, regulatory subunit 1 (45kDa)
PABPC1	poly(A) binding protein, cytoplasmic 1
FRS2	fibroblast growth factor receptor substrate 2
TMX4	thioredoxin-related transmembrane protein 4
GAN	gigaxonin
ELTD1	EGF, latrophilin and seven transmembrane domain containing 1
C12orf66	chromosome 12 open reading frame 66
ZNF529	zinc finger protein 529
GSTK1	glutathione S-transferase kappa 1
AP3B1	adaptor-related protein complex 3, beta 1 subunit
LIN7A	lin-7 homolog A (C. elegans)
SLCO5A1	solute carrier organic anion transporter family, member 5A1
GAD1	glutamate decarboxylase 1 (brain, 67kDa)
THBS2	thrombospondin 2
DLX1	distal-less homeobox 1
PCBP3	poly(rC) binding protein 3
RNF219	ring finger protein 219
RP6-24A23.6	Uncharacterized protein
PEX2	peroxisomal biogenesis factor 2
COX20	COX20 cytochrome C oxidase assembly factor
POU2F1	POU class 2 homeobox 1
THRB	thyroid hormone receptor, beta
WNT16	wingless-type MMTV integration site family, member 16
P2RY14	purinergic receptor P2Y, G-protein coupled, 14
HDAC8	histone deacetylase 8
TBK1	TANK-binding kinase 1
ATG3	autophagy related 3
ACER3	alkaline ceramidase 3
AHSA2	AHA1, activator of heat shock 90kDa protein ATPase homolog 2 (yeast)
CAMK4	calcium/calmodulin-dependent protein kinase IV
ARHGAP12	Rho GTPase activating protein 12
LRBA	LPS-responsive vesicle trafficking, beach and anchor containing
MTSS1	metastasis suppressor 1
ONECUT2	one cut homeobox 2
RP11-664D7.4	HCG1787533; Uncharacterized protein
ARMCX3	armadillo repeat containing, X-linked 3
MUM1L1	melanoma associated antigen (mutated) 1-like 1
SPOP	speckle-type POZ protein
SLC2A12	solute carrier family 2 (facilitated glucose transporter), member 12
FBXL4	F-box and leucine-rich repeat protein 4
KRAS	Kirsten rat sarcoma viral oncogene homolog
TRIM59	tripartite motif containing 59
PEAK1	pseudopodium-enriched atypical kinase 1
AAK1	AP2 associated kinase 1
KAT2B	K(lysine) acetyltransferase 2B
PCDH11Y	protocadherin 11 Y-linked
MOAP1	modulator of apoptosis 1
PDS5A	PDS5, regulator of cohesion maintenance, homolog A (S. cerevisiae)
RIPK1	receptor (TNFRSF)-interacting serine-threonine kinase 1
PRKAA2	protein kinase, AMP-activated, alpha 2 catalytic subunit
ZNF512	zinc finger protein 512
SLC10A2	solute carrier family 10 (sodium/bile acid cotransporter), member 2
MTDH	metadherin
TPH1	tryptophan hydroxylase 1
BCL11B	B-cell CLL/lymphoma 11B (zinc finger protein)
PCDH19	protocadherin 19
CTNNA3	catenin (cadherin-associated protein), alpha 3
KCNB1	potassium voltage-gated channel, Shab-related subfamily, member 1
ZNF280C	zinc finger protein 280C
HS6ST2	heparan sulfate 6-O-sulfotransferase 2
GSE1	Gse1 coiled-coil protein
DUSP28	dual specificity phosphatase 28
PSTK	phosphoseryl-tRNA kinase
GMNC	geminin coiled-coil domain containing
PTGFR	prostaglandin F receptor (FP)
LOXL2	lysyl oxidase-like 2
TMEM154	transmembrane protein 154
GATC	glutamyl-tRNA(Gln) amidotransferase, subunit C
RPS6KA5	ribosomal protein S6 kinase, 90kDa, polypeptide 5
SAV1	salvador homolog 1 (Drosophila)
CREG2	cellular repressor of E1A-stimulated genes 2
QRSL1	glutaminyl-tRNA synthase (glutamine-hydrolyzing)-like 1
CALD1	caldesmon 1
PI4K2A	Phosphatidylinositol 4-kinase type 2-alpha; Uncharacterized protein
NPL	N-acetylneuraminate pyruvate lyase (dihydrodipicolinate synthase)
ALKBH4	alkB, alkylation repair homolog 4 (E. coli)
SLC16A14	solute carrier family 16, member 14
ZNF236	zinc finger protein 236
ZNF91	zinc finger protein 91
SERPINB10	serpin peptidase inhibitor, clade B (ovalbumin), member 10
MDFIC	MyoD family inhibitor domain containing
CTBS	chitobiase, di-N-acetyl-
TSHZ3	teashirt zinc finger homeobox 3
MT-ATP6	mitochondrially encoded ATP synthase 6
MGAT5	mannosyl (alpha-1,6-)-glycoprotein beta-1,6-N-acetyl-glucosaminyltransferase
TANC2	tetratricopeptide repeat, ankyrin repeat and coiled-coil containing 2
C9orf41	chromosome 9 open reading frame 41
HIST2H2BE	histone cluster 2, H2be
NUFIP1	nuclear fragile X mental retardation protein interacting protein 1
SPTSSA	serine palmitoyltransferase, small subunit A
TEX2	testis expressed 2
DIEXF	digestive organ expansion factor homolog (zebrafish)
AFF2	AF4/FMR2 family, member 2
ZNF253	zinc finger protein 253
NKAIN3	Na+/K+ transporting ATPase interacting 3
C3orf17	chromosome 3 open reading frame 17
ZDHHC21	zinc finger, DHHC-type containing 21
ZNF791	zinc finger protein 791
SETD7	SET domain containing (lysine methyltransferase) 7
NKRF	NFKB repressing factor
GRSF1	G-rich RNA sequence binding factor 1
HERC4	HECT and RLD domain containing E3 ubiquitin protein ligase 4
MPV17L2	MPV17 mitochondrial membrane protein-like 2
PBRM1	polybromo 1
SASS6	spindle assembly 6 homolog (C. elegans)
LIN52	lin-52 homolog (C. elegans)
PHF15	PHD finger protein 15
LARP4	La ribonucleoprotein domain family, member 4
UBA2	ubiquitin-like modifier activating enzyme 2
DTHD1	death domain containing 1
PHC2	polyhomeotic homolog 2 (Drosophila)
SLC16A7	solute carrier family 16 (monocarboxylate transporter), member 7
PHF20	PHD finger protein 20
PDK3	pyruvate dehydrogenase kinase, isozyme 3
LHFP	lipoma HMGIC fusion partner
TMEM35	transmembrane protein 35
RUFY2	RUN and FYVE domain containing 2
EDNRA	endothelin receptor type A
KLRC4	killer cell lectin-like receptor subfamily C, member 4
PA2G4	proliferation-associated 2G4, 38kDa
STON2	stonin 2
SMAP2	small ArfGAP2
NEDD9	neural precursor cell expressed, developmentally down-regulated 9
SFRP2	secreted frizzled-related protein 2
MCM4	minichromosome maintenance complex component 4
FREM2	FRAS1 related extracellular matrix protein 2
CD2AP	CD2-associated protein
USP44	ubiquitin specific peptidase 44
PHYHIPL	phytanoyl-CoA 2-hydroxylase interacting protein-like
CCR4	chemokine (C-C motif) receptor 4
DSG1	desmoglein 1
IMPG2	interphotoreceptor matrix proteoglycan 2
LEPROT	leptin receptor overlapping transcript
BNIP2	BCL2/adenovirus E1B 19kDa interacting protein 2
DNAJC10	DnaJ (Hsp40) homolog, subfamily C, member 10
PPP1R12A	protein phosphatase 1, regulatory subunit 12A
IRAK4	interleukin-1 receptor-associated kinase 4
PAIP2	poly(A) binding protein interacting protein 2
DGKI	diacylglycerol kinase, iota
NCBP2	nuclear cap binding protein subunit 2, 20kDa
FAM124A	family with sequence similarity 124A
PAK7	p21 protein (Cdc42/Rac)-activated kinase 7
LY6K	lymphocyte antigen 6 complex, locus K
IPCEF1	interaction protein for cytohesin exchange factors 1
WIPF2	WAS/WASL interacting protein family, member 2
PRDX3	peroxiredoxin 3
WDR89	WD repeat domain 89
ZNF546	zinc finger protein 546
USP8	ubiquitin specific peptidase 8
COL6A3	collagen, type VI, alpha 3
HS2ST1	heparan sulfate 2-O-sulfotransferase 1
SGMS2	sphingomyelin synthase 2
ROCK2	Rho-associated, coiled-coil containing protein kinase 2
INPP4B	inositol polyphosphate-4-phosphatase, type II, 105kDa
NOVA1	neuro-oncological ventral antigen 1
SPATA8	spermatogenesis associated 8
H3F3B	H3 histone, family 3B (H3.3B)
SPTY2D1	SPT2, Suppressor of Ty, domain containing 1 (S. cerevisiae)
CLCN4	chloride channel, voltage-sensitive 4
CDYL	chromodomain protein, Y-like
IGF2BP1	insulin-like growth factor 2 mRNA binding protein 1
NEXN	nexilin (F actin binding protein)
GXYLT1	glucoside xylosyltransferase 1
CMPK1	cytidine monophosphate (UMP-CMP) kinase 1, cytosolic
ZIC2	Zic family member 2
ESCO1	establishment of sister chromatid cohesion N-acetyltransferase 1
NECAB1	N-terminal EF-hand calcium binding protein 1
MSH3	mutS homolog 3
GNAQ	guanine nucleotide binding protein (G protein), q polypeptide
GJA1	gap junction protein, alpha 1, 43kDa
NFATC2IP	nuclear factor of activated T-cells, cytoplasmic, calcineurin-dependent 2 interacting protein
ANTXR1	anthrax toxin receptor 1
RP1	retinitis pigmentosa 1 (autosomal dominant)
EIF2AK2	eukaryotic translation initiation factor 2-alpha kinase 2
PDHX	pyruvate dehydrogenase complex, component X
SYVN1	synovial apoptosis inhibitor 1, synoviolin
TSNAX	translin-associated factor X
ZNF596	zinc finger protein 596
IL13RA1	interleukin 13 receptor, alpha 1
CPEB4	cytoplasmic polyadenylation element binding protein 4
FGF13	fibroblast growth factor 13
FOXL1	forkhead box L1
RLIM	ring finger protein, LIM domain interacting
SV2B	synaptic vesicle glycoprotein 2B
CYP8B1	cytochrome P450, family 8, subfamily B, polypeptide 1
PPP1R12B	protein phosphatase 1, regulatory subunit 12B
ARID5B	AT rich interactive domain 5B (MRF1-like)
GABRA3	gamma-aminobutyric acid (GABA) A receptor, alpha 3
EPN3	epsin 3
DST	dystonin
RASA4	RAS p21 protein activator 4
NOTCH2NL	notch 2 N-terminal like
IDH1	isocitrate dehydrogenase 1 (NADP+), soluble
CDC42BPB	CDC42 binding protein kinase beta (DMPK-like)
IFI44L	interferon-induced protein 44-like
KCNQ3	potassium voltage-gated channel, KQT-like subfamily, member 3
SLC1A1	solute carrier family 1 (neuronal/epithelial high affinity glutamate transporter, system Xag), member 1
ATP2B4	ATPase, Ca++ transporting, plasma membrane 4
MICALCL	MICAL C-terminal like
TEAD1	TEA domain family member 1 (SV40 transcriptional enhancer factor)
YIPF5	Yip1 domain family, member 5
AKTIP	AKT interacting protein
HNMT	histamine N-methyltransferase
CNTN5	contactin 5
DDIT4L	DNA-damage-inducible transcript 4-like
PPCS	phosphopantothenoylcysteine synthetase
GPR61	G protein-coupled receptor 61
ACPL2	acid phosphatase-like 2
C22orf23	chromosome 22 open reading frame 23
ANKRD44	ankyrin repeat domain 44
SOX11	SRY (sex determining region Y)-box 11
RTN4IP1	reticulon 4 interacting protein 1
TFAM	transcription factor A, mitochondrial
ZSWIM6	zinc finger, SWIM-type containing 6
RALGPS2	Ral GEF with PH domain and SH3 binding motif 2
MAFB	v-maf avian musculoaponeurotic fibrosarcoma oncogene homolog B
PNMA1	paraneoplastic Ma antigen 1
ACOX1	acyl-CoA oxidase 1, palmitoyl
DENND4A	DENN/MADD domain containing 4A
PROX1	prospero homeobox 1
C11orf54	chromosome 11 open reading frame 54
KLF8	Kruppel-like factor 8
ZNF585A	zinc finger protein 585A
DLL1	delta-like 1 (Drosophila)
ZNF286B	zinc finger protein 286B
AL021546.6	Glutamyl-tRNA(Gln) amidotransferase subunit C, mitochondrial
PDGFB	platelet-derived growth factor beta polypeptide
IKZF2	IKAROS family zinc finger 2 (Helios)
FAM126A	family with sequence similarity 126, member A
PIKFYVE	phosphoinositide kinase, FYVE finger containing
HP1BP3	heterochromatin protein 1, binding protein 3
TFDP1	transcription factor Dp-1
HMBOX1	homeobox containing 1
TRA2B	transformer 2 beta homolog (Drosophila)
PAX6	paired box 6
LONRF2	LON peptidase N-terminal domain and ring finger 2
FAM120C	family with sequence similarity 120C
PM20D2	peptidase M20 domain containing 2
PIK3C3	phosphatidylinositol 3-kinase, catalytic subunit type 3
CPNE3	copine III
PPP1R3C	protein phosphatase 1, regulatory subunit 3C
FBLN7	fibulin 7
PRKAA1	protein kinase, AMP-activated, alpha 1 catalytic subunit
CADM1	cell adhesion molecule 1
FBXO11	F-box protein 11
SLMAP	sarcolemma associated protein
PRSS35	protease, serine, 35
ZKSCAN4	zinc finger with KRAB and SCAN domains 4
ELAVL2	ELAV like neuron-specific RNA binding protein 2
COL24A1	collagen, type XXIV, alpha 1
PTPN22	protein tyrosine phosphatase, non-receptor type 22 (lymphoid)
SPATS2	spermatogenesis associated, serine-rich 2
TMEM184C	transmembrane protein 184C
CNIH1	cornichon family AMPA receptor auxiliary protein 1
UBL7	ubiquitin-like 7 (bone marrow stromal cell-derived)
CHMP2B	charged multivesicular body protein 2B
ZNF793	zinc finger protein 793
CSNK1G3	casein kinase 1, gamma 3
PRDM8	PR domain containing 8
MAP3K1	mitogen-activated protein kinase kinase kinase 1, E3 ubiquitin protein ligase
NHLH1	nescient helix loop helix 1
NRSN1	neurensin 1
CACYBP	calcyclin binding protein
TMX2	thioredoxin-related transmembrane protein 2
TPPP	tubulin polymerization promoting protein
ING5	inhibitor of growth family, member 5
MED6	mediator complex subunit 6
GPR75	G protein-coupled receptor 75
WDR7	WD repeat domain 7
SGCD	sarcoglycan, delta (35kDa dystrophin-associated glycoprotein)
DCAF12L2	DDB1 and CUL4 associated factor 12-like 2
SEMA3C	sema domain, immunoglobulin domain (Ig), short basic domain, secreted, (semaphorin) 3C
ZBTB41	zinc finger and BTB domain containing 41
ZNF528	zinc finger protein 528
HIAT1	hippocampus abundant transcript 1
TOP2A	topoisomerase (DNA) II alpha 170kDa
PHIP	pleckstrin homology domain interacting protein
USP6	ubiquitin specific peptidase 6 (Tre-2 oncogene)
THSD4	thrombospondin, type I, domain containing 4
NR4A2	nuclear receptor subfamily 4, group A, member 2
FAXC	failed axon connections homolog (Drosophila)
EPB41L5	erythrocyte membrane protein band 4.1 like 5
SAP30L	SAP30-like
PPP6R3	protein phosphatase 6, regulatory subunit 3
CMTR2	cap methyltransferase 2
OTUD1	OTU domain containing 1
OSTM1	osteopetrosis associated transmembrane protein 1
FLVCR1	feline leukemia virus subgroup C cellular receptor 1
MME	membrane metallo-endopeptidase
ARHGEF33	Rho guanine nucleotide exchange factor (GEF) 33
2019-03-01	membrane-associated ring finger (C3HC4) 1, E3 ubiquitin protein ligase
RBFOX1	RNA binding protein, fox-1 homolog (C. elegans) 1
FRZB	frizzled-related protein
CEP350	centrosomal protein 350kDa
FAM188A	family with sequence similarity 188, member A
PID1	phosphotyrosine interaction domain containing 1
CLIC5	chloride intracellular channel 5
ZC3H14	zinc finger CCCH-type containing 14
KIAA1958	KIAA1958
TSPAN12	tetraspanin 12
DNAJC3	DnaJ (Hsp40) homolog, subfamily C, member 3
ARNTL2	aryl hydrocarbon receptor nuclear translocator-like 2
IQSEC3	IQ motif and Sec7 domain 3
ZC3H12B	zinc finger CCCH-type containing 12B
PCDHA5	protocadherin alpha 5
MAGEA10	melanoma antigen family A, 10
GAB1	GRB2-associated binding protein 1
ZNF180	zinc finger protein 180
CYP1B1	cytochrome P450, family 1, subfamily B, polypeptide 1
GXYLT2	glucoside xylosyltransferase 2
GNAI3	guanine nucleotide binding protein (G protein), alpha inhibiting activity polypeptide 3
EXPH5	exophilin 5
INSIG2	insulin induced gene 2
PRKAR1A	protein kinase, cAMP-dependent, regulatory, type I, alpha
FUBP1	far upstream element (FUSE) binding protein 1
POC1B	POC1 centriolar protein B
AMOTL1	angiomotin like 1
ENTPD1	ectonucleoside triphosphate diphosphohydrolase 1
CD44	CD44 molecule (Indian blood group)
FAM167A	family with sequence similarity 167, member A
RUNX2	runt-related transcription factor 2
TP63	tumor protein p63
PPM1L	protein phosphatase, Mg2+/Mn2+ dependent, 1L
NEBL	nebulette
MTPN	myotrophin
BARD1	BRCA1 associated RING domain 1
RSBN1	round spermatid basic protein 1
INSR	insulin receptor
TMEM117	transmembrane protein 117
AHCY	adenosylhomocysteinase
TSN	translin
SEPSECS	Sep (O-phosphoserine) tRNA:Sec (selenocysteine) tRNA synthase
UBP1	upstream binding protein 1 (LBP-1a)
BRD1	bromodomain containing 1
C1orf116	chromosome 1 open reading frame 116
KANSL1L	KAT8 regulatory NSL complex subunit 1-like
HECTD4	HECT domain containing E3 ubiquitin protein ligase 4
KIF26B	kinesin family member 26B
PHTF2	putative homeodomain transcription factor 2
BDKRB2	bradykinin receptor B2
TLR3	toll-like receptor 3
PAG1	phosphoprotein associated with glycosphingolipid microdomains 1
ESRP1	epithelial splicing regulatory protein 1
ZNF549	zinc finger protein 549
ADAMTS3	ADAM metallopeptidase with thrombospondin type 1 motif, 3
TMEM255A	transmembrane protein 255A
MSL3	male-specific lethal 3 homolog (Drosophila)
TRPM3	transient receptor potential cation channel, subfamily M, member 3
SPHKAP	SPHK1 interactor, AKAP domain containing
ANAPC1	anaphase promoting complex subunit 1
OPHN1	oligophrenin 1
ZNF536	zinc finger protein 536
BAG4	BCL2-associated athanogene 4
KIAA2022	KIAA2022
KIAA0907	KIAA0907
FOXO3	forkhead box O3
TENM1	teneurin transmembrane protein 1
GRID2	glutamate receptor, ionotropic, delta 2
SLC24A2	solute carrier family 24 (sodium/potassium/calcium exchanger), member 2
KLHL15	kelch-like family member 15
SNRK	SNF related kinase
IL16	interleukin 16
TRIM2	tripartite motif containing 2
DUOX2	dual oxidase 2
MKL2	MKL/myocardin-like 2
MICAL2	microtubule associated monooxygenase, calponin and LIM domain containing 2
OGFRL1	opioid growth factor receptor-like 1
FERMT1	fermitin family member 1
IPMK	inositol polyphosphate multikinase
FRK	fyn-related kinase
ZNF615	zinc finger protein 615
PPIA	peptidylprolyl isomerase A (cyclophilin A)
PLCXD2	phosphatidylinositol-specific phospholipase C, X domain containing 2
DIP2B	DIP2 disco-interacting protein 2 homolog B (Drosophila)
RPL37A	ribosomal protein L37a
RBM27	RNA binding motif protein 27
PCDHAC2	protocadherin alpha subfamily C, 2
ZNF275	zinc finger protein 275
HSPA4L	heat shock 70kDa protein 4-like
PPM1E	protein phosphatase, Mg2+/Mn2+ dependent, 1E
SLC4A4	solute carrier family 4 (sodium bicarbonate cotransporter), member 4
DNM3	dynamin 3
FAM19A2	family with sequence similarity 19 (chemokine (C-C motif)-like), member A2
TMEM38B	transmembrane protein 38B
TNRC6B	trinucleotide repeat containing 6B
TLR8	toll-like receptor 8
SH3GL2	SH3-domain GRB2-like 2
INTS2	integrator complex subunit 2
VSTM5	V-set and transmembrane domain containing 5
TAX1BP1	Tax1 (human T-cell leukemia virus type I) binding protein 1
IMPACT	impact RWD domain protein
FAM84A	family with sequence similarity 84, member A
ACSL5	acyl-CoA synthetase long-chain family member 5
SLC8A1	solute carrier family 8 (sodium/calcium exchanger), member 1
EID1	EP300 interacting inhibitor of differentiation 1
TTF2	transcription termination factor, RNA polymerase II
GSPT1	G1 to S phase transition 1
RPAP3	RNA polymerase II associated protein 3
PCDHB16	protocadherin beta 16
CBX5	chromobox homolog 5
STXBP5	syntaxin binding protein 5 (tomosyn)
SHE	Src homology 2 domain containing E
RP11-1026M7.2	Uncharacterized protein
ASAH2	N-acylsphingosine amidohydrolase (non-lysosomal ceramidase) 2
TRIM10	tripartite motif containing 10
MICU3	mitochondrial calcium uptake family, member 3
ELP4	elongator acetyltransferase complex subunit 4
CBX6	chromobox homolog 6
QSER1	glutamine and serine rich 1
BRWD3	bromodomain and WD repeat domain containing 3
RNF19B	ring finger protein 19B
ZNF398	zinc finger protein 398
AC021218.2	Uncharacterized protein
NAALADL2	N-acetylated alpha-linked acidic dipeptidase-like 2
ATP8A1	ATPase, aminophospholipid transporter (APLT), class I, type 8A, member 1
UHRF1BP1	UHRF1 binding protein 1
CENPO	centromere protein O
FAM179B	family with sequence similarity 179, member B
GOLGA1	golgin A1
ARHGEF12	Rho guanine nucleotide exchange factor (GEF) 12
SDC2	syndecan 2
SPRY4	sprouty homolog 4 (Drosophila)
PRDM6	PR domain containing 6
THAP2	THAP domain containing, apoptosis associated protein 2
SMAD2	SMAD family member 2
METTL21A	methyltransferase like 21A
RBM18	RNA binding motif protein 18
WDR72	WD repeat domain 72
KLRB1	killer cell lectin-like receptor subfamily B, member 1
PLEKHH1	pleckstrin homology domain containing, family H (with MyTH4 domain) member 1
NOV	nephroblastoma overexpressed
IPO7	importin 7
SLC16A10	solute carrier family 16 (aromatic amino acid transporter), member 10
WSB1	WD repeat and SOCS box containing 1
PPP4R1L	protein phosphatase 4, regulatory subunit 1-like
IL17RD	interleukin 17 receptor D
C4orf46	chromosome 4 open reading frame 46
CHML	choroideremia-like (Rab escort protein 2)
ZBTB8A	zinc finger and BTB domain containing 8A
RRM2B	ribonucleotide reductase M2 B (TP53 inducible)
RNF150	ring finger protein 150
PAXIP1	PAX interacting (with transcription-activation domain) protein 1
KDELC2	KDEL (Lys-Asp-Glu-Leu) containing 2
UBQLN1	ubiquilin 1
GOLIM4	golgi integral membrane protein 4
ECM2	extracellular matrix protein 2, female organ and adipocyte specific
SLAIN2	SLAIN motif family, member 2
CLPX	caseinolytic mitochondrial matrix peptidase chaperone subunit
MDC1	mediator of DNA-damage checkpoint 1
MTMR8	myotubularin related protein 8
MEI4	meiosis-specific 4 homolog (S. cerevisiae)
EMP1	epithelial membrane protein 1
CLEC1B	C-type lectin domain family 1, member B
COL25A1	collagen, type XXV, alpha 1
BICD1	bicaudal D homolog 1 (Drosophila)
RNF152	ring finger protein 152
RBL1	retinoblastoma-like 1 (p107)
UBR1	ubiquitin protein ligase E3 component n-recognin 1
CLSTN1	calsyntenin 1
PRPF4B	pre-mRNA processing factor 4B
ROR2	receptor tyrosine kinase-like orphan receptor 2
LTB	lymphotoxin beta (TNF superfamily, member 3)
ARL10	ADP-ribosylation factor-like 10
EOMES	eomesodermin
PIK3CG	phosphatidylinositol-4,5-bisphosphate 3-kinase, catalytic subunit gamma
DUSP19	dual specificity phosphatase 19
VPS37B	vacuolar protein sorting 37 homolog B (S. cerevisiae)
SPATA17	spermatogenesis associated 17
PWWP2A	PWWP domain containing 2A
SCAI	suppressor of cancer cell invasion
SRD5A1	steroid-5-alpha-reductase, alpha polypeptide 1 (3-oxo-5 alpha-steroid delta 4-dehydrogenase alpha 1)
2019-03-05	membrane-associated ring finger (C3HC4) 5
WDYHV1	WDYHV motif containing 1
TMCC3	transmembrane and coiled-coil domain family 3
PEX3	peroxisomal biogenesis factor 3
PPP1CB	protein phosphatase 1, catalytic subunit, beta isozyme
ERVMER34-1	endogenous retrovirus group MER34, member 1
AGO1	argonaute RISC catalytic component 1
CCL4L1	chemokine (C-C motif) ligand 4-like 1
PROSC	proline synthetase co-transcribed homolog (bacterial)
GIGYF1	GRB10 interacting GYF protein 1
TMEM236	transmembrane protein 236
TMEM236
BAZ2B	bromodomain adjacent to zinc finger domain, 2B
ZNF286A	Zinc finger protein 286A
FPR2	formyl peptide receptor 2
YTHDC1	YTH domain containing 1
UNC79	unc-79 homolog (C. elegans)
FAM81A	family with sequence similarity 81, member A
KAT6A	K(lysine) acetyltransferase 6A
ATXN1	ataxin 1
ZDHHC20	zinc finger, DHHC-type containing 20
GABPB2	GA binding protein transcription factor, beta subunit 2
RBM33	RNA binding motif protein 33
PRSS21	protease, serine, 21 (testisin)
LRP6	low density lipoprotein receptor-related protein 6
FAM76B	family with sequence similarity 76, member B
CPEB3	cytoplasmic polyadenylation element binding protein 3
SRSF5	serine/arginine-rich splicing factor 5
HOXB2	homeobox B2
IFNE	interferon, epsilon
PROK1	prokineticin 1
PRMT2	protein arginine methyltransferase 2
CARKD	carbohydrate kinase domain containing
HMGA2	high mobility group AT-hook 2
KIAA1009	KIAA1009
PEX13	peroxisomal biogenesis factor 13
KLHL24	kelch-like family member 24
TGFB2	transforming growth factor, beta 2
USP46	ubiquitin specific peptidase 46
COBL	cordon-bleu WH2 repeat protein
CSNK1G1	casein kinase 1, gamma 1
PURB	purine-rich element binding protein B
SH3BGRL2	SH3 domain binding glutamic acid-rich protein like 2
FEM1C	fem-1 homolog c (C. elegans)
FAM63B	family with sequence similarity 63, member B
PRDM10	PR domain containing 10
AKNA	AT-hook transcription factor
NUPL1	nucleoporin like 1
PLD1	phospholipase D1, phosphatidylcholine-specific
PAX5	paired box 5
ZNF776	zinc finger protein 776
FBXO40	F-box protein 40
ZSWIM3	zinc finger, SWIM-type containing 3
SLC7A14	solute carrier family 7, member 14
POU6F2	POU class 6 homeobox 2
TRPM6	transient receptor potential cation channel, subfamily M, member 6
GAB3	GRB2-associated binding protein 3
TET1	tet methylcytosine dioxygenase 1
PER3	period circadian clock 3
SLFN13	schlafen family member 13
SEC14L5	SEC14-like 5 (S. cerevisiae)
GRIP1	glutamate receptor interacting protein 1
GLDN	gliomedin
RAD21	RAD21 homolog (S. pombe)
NFIA	nuclear factor I/A
SEC62	SEC62 homolog (S. cerevisiae)
PLA2G2D	phospholipase A2, group IID
CHERP	calcium homeostasis endoplasmic reticulum protein
SYT2	synaptotagmin II
TMEM257	transmembrane protein 257
GOLGA8A	golgin A8 family, member A
CNTF	ciliary neurotrophic factor
ZBTB11	zinc finger and BTB domain containing 11
ALKBH8	alkB, alkylation repair homolog 8 (E. coli)
GOLGA8N	golgin A8 family, member N
SPECC1L	sperm antigen with calponin homology and coiled-coil domains 1-like
NFATC2	nuclear factor of activated T-cells, cytoplasmic, calcineurin-dependent 2
NCOA2	nuclear receptor coactivator 2
FAM135B	family with sequence similarity 135, member B
SLC30A6	solute carrier family 30 (zinc transporter), member 6
JMJD1C	jumonji domain containing 1C
ALX4	ALX homeobox 4
ZNF831	zinc finger protein 831
RGL1	ral guanine nucleotide dissociation stimulator-like 1
KIAA2018	KIAA2018
SNX29	sorting nexin 29
PRKACB	protein kinase, cAMP-dependent, catalytic, beta
GOLGA6L9	Homo sapiens golgin subfamily A member 6-like protein 9-like (LOC101927658), mRNA.
CBL	Cbl proto-oncogene, E3 ubiquitin protein ligase
HRNR	hornerin
LARGE	like-glycosyltransferase
HAVCR2	hepatitis A virus cellular receptor 2
TRIM44	tripartite motif containing 44
NOX5	NADPH oxidase, EF-hand calcium binding domain 5
DISC1	disrupted in schizophrenia 1
CHD2	chromodomain helicase DNA binding protein 2
UBXN2B	UBX domain protein 2B
BSND	Bartter syndrome, infantile, with sensorineural deafness (Barttin)
VSX2	visual system homeobox 2
SLCO1A2	solute carrier organic anion transporter family, member 1A2
GOLGA6L9	golgin A6 family-like 9
FAM198B	family with sequence similarity 198, member B
SULT1C4	sulfotransferase family, cytosolic, 1C, member 4
PRICKLE2	prickle homolog 2 (Drosophila)
RP11-766F14.2	Protein LOC285556
INPP4A	inositol polyphosphate-4-phosphatase, type I, 107kDa
TTC9	tetratricopeptide repeat domain 9
ITGB8	integrin, beta 8
MTR	5-methyltetrahydrofolate-homocysteine methyltransferase
GHITM	growth hormone inducible transmembrane protein
2019-03-07	membrane-associated ring finger (C3HC4) 7, E3 ubiquitin protein ligase
SNTB2	syntrophin, beta 2 (dystrophin-associated protein A1, 59kDa, basic component 2)
GNB4	guanine nucleotide binding protein (G protein), beta polypeptide 4
TASP1	taspase, threonine aspartase, 1
CAMKK2	calcium/calmodulin-dependent protein kinase kinase 2, beta
SESTD1	SEC14 and spectrin domains 1
SLC35B4	solute carrier family 35 (UDP-xylose/UDP-N-acetylglucosamine transporter), member B4
UBE2G2	ubiquitin-conjugating enzyme E2G 2
ADH6	alcohol dehydrogenase 6 (class V)
EID2	EP300 interacting inhibitor of differentiation 2
NCR3LG1	natural killer cell cytotoxicity receptor 3 ligand 1
SP3	Sp3 transcription factor
CHD9	chromodomain helicase DNA binding protein 9
FAM26E	family with sequence similarity 26, member E
UBE2QL1	ubiquitin-conjugating enzyme E2Q family-like 1
SHANK2	SH3 and multiple ankyrin repeat domains 2
URB2	URB2 ribosome biogenesis 2 homolog (S. cerevisiae)
ZYG11B	zyg-11 family member B, cell cycle regulator
IDE	insulin-degrading enzyme
RNF44	ring finger protein 44
DOK5	docking protein 5
PLA2R1	phospholipase A2 receptor 1, 180kDa
TRMT2B	tRNA methyltransferase 2 homolog B (S. cerevisiae)
ARHGAP23	Rho GTPase activating protein 23
ZFP28	ZFP28 zinc finger protein
ST8SIA2	ST8 alpha-N-acetyl-neuraminide alpha-2,8-sialyltransferase 2
RASEF	RAS and EF-hand domain containing
AFF3	AF4/FMR2 family, member 3
DSEL	dermatan sulfate epimerase-like
ZBTB1	zinc finger and BTB domain containing 1
PPIP5K2	diphosphoinositol pentakisphosphate kinase 2
CAV2	caveolin 2
TNIK	TRAF2 and NCK interacting kinase
LINS	lines homolog (Drosophila)
AGTPBP1	ATP/GTP binding protein 1
LSM11	LSM11, U7 small nuclear RNA associated
PRDM5	PR domain containing 5
GLI3	GLI family zinc finger 3
CCNT2	cyclin T2
IDS	Iduronate 2-sulfatase (Hunter syndrome), isoform CRA_e; Iduronate 2-sulfatase 14 kDa chain; cDNA FLJ42669 fis, clone BRAMY2022168, highly similar to IDURONATE 2-SULFATASE
MAF	v-maf avian musculoaponeurotic fibrosarcoma oncogene homolog
BCL2	B-cell CLL/lymphoma 2
SAMD4A	sterile alpha motif domain containing 4A
PTPRG	protein tyrosine phosphatase, receptor type, G
RAB2A	RAB2A, member RAS oncogene family
PHF23	PHD finger protein 23
MCU	mitochondrial calcium uniporter
UBE3A	ubiquitin protein ligase E3A
THOC2	THO complex 2
ZNF112	zinc finger protein 112
LRIG2	leucine-rich repeats and immunoglobulin-like domains 2
ERMN	ermin, ERM-like protein
EXOC8	exocyst complex component 8
EPHA6	EPH receptor A6
ZRANB2	zinc finger, RAN-binding domain containing 2
ZNF160	zinc finger protein 160
NLGN2	neuroligin 2
TSC1	tuberous sclerosis 1
MDM4	Mdm4 p53 binding protein homolog (mouse)
FAM222B	family with sequence similarity 222, member B
RAB3GAP2	RAB3 GTPase activating protein subunit 2 (non-catalytic)
IDI1	isopentenyl-diphosphate delta isomerase 1
ZCCHC14	zinc finger, CCHC domain containing 14
ZNF106	zinc finger protein 106
ERLIN2	ER lipid raft associated 2
PPIC	peptidylprolyl isomerase C (cyclophilin C)
CNKSR2	connector enhancer of kinase suppressor of Ras 2
LINGO2	leucine rich repeat and Ig domain containing 2
ZFP42	ZFP42 zinc finger protein
2019-03-06	membrane-associated ring finger (C3HC4) 6, E3 ubiquitin protein ligase
COLGALT1	collagen beta(1-O)galactosyltransferase 1
LRRC8C	leucine rich repeat containing 8 family, member C
ROR1	receptor tyrosine kinase-like orphan receptor 1
SLC15A2	solute carrier family 15 (oligopeptide transporter), member 2
BRCA1	breast cancer 1, early onset
KATNAL1	katanin p60 subunit A-like 1
POGK	pogo transposable element with KRAB domain
WIPF1	WAS/WASL interacting protein family, member 1
ZNF264	zinc finger protein 264
PRPS2	phosphoribosyl pyrophosphate synthetase 2
UBE2K	ubiquitin-conjugating enzyme E2K
COX11	cytochrome c oxidase assembly homolog 11 (yeast)
OSBPL3	oxysterol binding protein-like 3
SLC25A16	solute carrier family 25 (mitochondrial carrier; Graves disease autoantigen), member 16
CTDSPL2	CTD (carboxy-terminal domain, RNA polymerase II, polypeptide A) small phosphatase like 2
CHRM3	cholinergic receptor, muscarinic 3
ITGBL1	integrin, beta-like 1 (with EGF-like repeat domains)
UBE2H	ubiquitin-conjugating enzyme E2H
IVNS1ABP	influenza virus NS1A binding protein
MSL2	male-specific lethal 2 homolog (Drosophila)
BMP5	bone morphogenetic protein 5
RWDD4	RWD domain containing 4
GPC4	glypican 4
DAGLA	diacylglycerol lipase, alpha
GPALPP1	GPALPP motifs containing 1
NDUFS1	NADH dehydrogenase (ubiquinone) Fe-S protein 1, 75kDa (NADH-coenzyme Q reductase)
MAN2A1	mannosidase, alpha, class 2A, member 1
MARK1	MAP/microtubule affinity-regulating kinase 1
AKAP13	A kinase (PRKA) anchor protein 13
ZNF780A	zinc finger protein 780A
KBTBD7	kelch repeat and BTB (POZ) domain containing 7
MAPK9	mitogen-activated protein kinase 9
AHRR	aryl-hydrocarbon receptor repressor
UNC5D	unc-5 homolog D (C. elegans)
AGGF1	angiogenic factor with G patch and FHA domains 1
PDE3B	phosphodiesterase 3B, cGMP-inhibited
CD36	CD36 molecule (thrombospondin receptor)
DYNLL2	dynein, light chain, LC8-type 2
MAP3K9	mitogen-activated protein kinase kinase kinase 9
TWISTNB	TWIST neighbor
TMEM245	transmembrane protein 245
IFRD1	interferon-related developmental regulator 1
HEY1	hairy/enhancer-of-split related with YRPW motif 1
TRPS1	trichorhinophalangeal syndrome I
SUSD1	sushi domain containing 1
TCEAL3	transcription elongation factor A (SII)-like 3
TLL2	tolloid-like 2
TMEM218	transmembrane protein 218
RFFL	ring finger and FYVE-like domain containing E3 ubiquitin protein ligase
SMYD1	SET and MYND domain containing 1
HOXB5	homeobox B5
HAUS2	HAUS augmin-like complex, subunit 2
RAD51L3-RFFL	Uncharacterized protein
GBE1	glucan (1,4-alpha-), branching enzyme 1
ZNF605	zinc finger protein 605
PPP1R3G	protein phosphatase 1, regulatory subunit 3G
ZNF195	zinc finger protein 195
EIF3H	eukaryotic translation initiation factor 3, subunit H
ZIK1	zinc finger protein interacting with K protein 1
H2AFV	H2A histone family, member V
U2SURP	U2 snRNP-associated SURP domain containing
C2ORF15	Uncharacterized protein C2orf15
TMEM144	transmembrane protein 144
VCAN	versican
PPP2R5E	protein phosphatase 2, regulatory subunit B', epsilon isoform
STX2	syntaxin 2
PCSK1	proprotein convertase subtilisin/kexin type 1
ZNF281	zinc finger protein 281
ZNF527	zinc finger protein 527
GTDC1	glycosyltransferase-like domain containing 1
P4HA1	prolyl 4-hydroxylase, alpha polypeptide I
RC3H1	ring finger and CCCH-type domains 1
HNRNPUL2	heterogeneous nuclear ribonucleoprotein U-like 2
FUT6	fucosyltransferase 6 (alpha (1,3) fucosyltransferase)
TBCK	TBC1 domain containing kinase
RBM20	RNA binding motif protein 20
BROX	BRO1 domain and CAAX motif containing
XIAP	X-linked inhibitor of apoptosis
PDE5A	phosphodiesterase 5A, cGMP-specific
HS3ST3A1	heparan sulfate (glucosamine) 3-O-sulfotransferase 3A1
ANKRD32	ankyrin repeat domain 32
POLR3A	polymerase (RNA) III (DNA directed) polypeptide A, 155kDa
SS18L1	synovial sarcoma translocation gene on chromosome 18-like 1
METTL8	methyltransferase like 8
FNBP1L	formin binding protein 1-like
CLASP2	cytoplasmic linker associated protein 2
RCAN3	RCAN family member 3
TARSL2	threonyl-tRNA synthetase-like 2
ORC2	origin recognition complex, subunit 2
FGF12	fibroblast growth factor 12
ARHGEF6	Rac/Cdc42 guanine nucleotide exchange factor (GEF) 6
SMIM14	small integral membrane protein 14
TMEM194A	transmembrane protein 194A
LACE1	lactation elevated 1
SYNPO2	synaptopodin 2
KRIT1	KRIT1, ankyrin repeat containing
LGALS8	lectin, galactoside-binding, soluble, 8
TIGD6	tigger transposable element derived 6
FCRL3	Fc receptor-like 3
TAB3	TGF-beta activated kinase 1/MAP3K7 binding protein 3
KANK2	KN motif and ankyrin repeat domains 2
FTSJ2	FtsJ RNA methyltransferase homolog 2 (E. coli)
ABTB2	ankyrin repeat and BTB (POZ) domain containing 2
CCDC80	coiled-coil domain containing 80
NPHP3	nephronophthisis 3 (adolescent)
TAOK3	TAO kinase 3
PHACTR2	phosphatase and actin regulator 2
PIAS2	protein inhibitor of activated STAT, 2
HECTD2	HECT domain containing E3 ubiquitin protein ligase 2
ABHD13	abhydrolase domain containing 13
RUNX1	runt-related transcription factor 1
GRK4	G protein-coupled receptor kinase 4
PTBP3	polypyrimidine tract binding protein 3
KCTD12	potassium channel tetramerization domain containing 12
RNF24	ring finger protein 24
BHLHE41	basic helix-loop-helix family, member e41
ZFP82	ZFP82 zinc finger protein
ZMYM2	zinc finger, MYM-type 2
ROBO1	roundabout, axon guidance receptor, homolog 1 (Drosophila)
SCO1	SCO1 cytochrome c oxidase assembly protein
HCN1	hyperpolarization activated cyclic nucleotide-gated potassium channel 1
NUP35	nucleoporin 35kDa
YWHAZ	tyrosine 3-monooxygenase/tryptophan 5-monooxygenase activation protein, zeta polypeptide
SGCB	sarcoglycan, beta (43kDa dystrophin-associated glycoprotein)
SET	SET nuclear oncogene
ZC3H15	zinc finger CCCH-type containing 15
MAML2	mastermind-like 2 (Drosophila)
RANBP6	RAN binding protein 6
SEPHS2	selenophosphate synthetase 2
ATRX	alpha thalassemia/mental retardation syndrome X-linked
ABCD2	ATP-binding cassette, sub-family D (ALD), member 2
ATP11B	ATPase, class VI, type 11B
ACVR2A	activin A receptor, type IIA
GLP2R	glucagon-like peptide 2 receptor
RNF11	ring finger protein 11
APBB2	amyloid beta (A4) precursor protein-binding, family B, member 2
SLC23A2	solute carrier family 23 (ascorbic acid transporter), member 2
TMEM139	transmembrane protein 139
RNF217	ring finger protein 217
ZNF486	zinc finger protein 486
RAE1	ribonucleic acid export 1
KIAA1549L	KIAA1549-like
TOR1AIP2	torsin A interacting protein 2
PEX19	peroxisomal biogenesis factor 19
MED13	mediator complex subunit 13
TLR6	toll-like receptor 6
TMEM169	transmembrane protein 169
MRPS25	mitochondrial ribosomal protein S25
NT5DC3	5'-nucleotidase domain containing 3
ACVR1	activin A receptor, type I
RP11-770J1.4
FAM219A	family with sequence similarity 219, member A
RAB37	RAB37, member RAS oncogene family
ASH1L	ash1 (absent, small, or homeotic)-like (Drosophila)
KCNQ5	potassium voltage-gated channel, KQT-like subfamily, member 5
PCDHA13	protocadherin alpha 13
FAIM2	Fas apoptotic inhibitory molecule 2
GAD2	glutamate decarboxylase 2 (pancreatic islets and brain, 65kDa)
ANKRD13A	ankyrin repeat domain 13A
CTNND2	catenin (cadherin-associated protein), delta 2
SLITRK1	SLIT and NTRK-like family, member 1
PDZRN3	PDZ domain containing ring finger 3
PDE1C	phosphodiesterase 1C, calmodulin-dependent 70kDa
KCTD7	potassium channel tetramerization domain containing 7
MRVI1	murine retrovirus integration site 1 homolog
C5AR2	complement component 5a receptor 2
SDK2	sidekick cell adhesion molecule 2
TMEM229B	transmembrane protein 229B
MFN2	mitofusin 2
ZNF558	zinc finger protein 558
RAB44	RAB44, member RAS oncogene family
C1QTNF5	C1q and tumor necrosis factor related protein 5
SPRY3	sprouty homolog 3 (Drosophila)
AQP2	aquaporin 2 (collecting duct)
MFRP	membrane frizzled-related protein
SLC36A2	solute carrier family 36 (proton/amino acid symporter), member 2
PCYT1B	phosphate cytidylyltransferase 1, choline, beta
SLC39A6	solute carrier family 39 (zinc transporter), member 6
C10orf128	chromosome 10 open reading frame 128
OR2C3	olfactory receptor, family 2, subfamily C, member 3
TET2	tet methylcytosine dioxygenase 2
RCC2	regulator of chromosome condensation 2
PIWIL2	piwi-like RNA-mediated gene silencing 2
ULK1	unc-51 like autophagy activating kinase 1
TNR	tenascin R
ARRDC4	arrestin domain containing 4
SPTLC3	serine palmitoyltransferase, long chain base subunit 3
SSR1	signal sequence receptor, alpha
ASCC3	activating signal cointegrator 1 complex subunit 3
FAM83F	family with sequence similarity 83, member F
BCAS1	breast carcinoma amplified sequence 1
MCTP2	multiple C2 domains, transmembrane 2
KIAA1644	KIAA1644
SLC30A8	solute carrier family 30 (zinc transporter), member 8
ZNF30	zinc finger protein 30
ITGB1	integrin, beta 1 (fibronectin receptor, beta polypeptide, antigen CD29 includes MDF2, MSK12)
ENOSF1	enolase superfamily member 1
SLC5A1	solute carrier family 5 (sodium/glucose cotransporter), member 1
ATRNL1	attractin-like 1
DCTN2	dynactin 2 (p50)
SRRM4	serine/arginine repetitive matrix 4
DPYSL3	dihydropyrimidinase-like 3
RORB	RAR-related orphan receptor B
HTR2C	5-hydroxytryptamine (serotonin) receptor 2C, G protein-coupled
TTC21B	tetratricopeptide repeat domain 21B
KCNK12	potassium channel, subfamily K, member 12
PGM2L1	phosphoglucomutase 2-like 1
ABCB5	ATP-binding cassette, sub-family B (MDR/TAP), member 5
WARS2	tryptophanyl tRNA synthetase 2, mitochondrial
PCDHA6	protocadherin alpha 6
PTPRN2	protein tyrosine phosphatase, receptor type, N polypeptide 2
ZNF304	zinc finger protein 304
FAM46D	family with sequence similarity 46, member D
LTBP2	latent transforming growth factor beta binding protein 2
KIAA1407	KIAA1407
AHR	aryl hydrocarbon receptor
CRCP	CGRP receptor component
EVC	Ellis van Creveld syndrome
PCDHA12	protocadherin alpha 12
B3GALT5	UDP-Gal:betaGlcNAc beta 1,3-galactosyltransferase, polypeptide 5
SCN7A	sodium channel, voltage-gated, type VII, alpha subunit
SIX4	SIX homeobox 4
PATE3	prostate and testis expressed 3
STXBP5L	syntaxin binding protein 5-like
PRR23C	proline rich 23C
ZNF674	zinc finger protein 674
ZNF609	zinc finger protein 609
IGF2BP2	insulin-like growth factor 2 mRNA binding protein 2
PCDHA10	protocadherin alpha 10
ANK3	ankyrin 3, node of Ranvier (ankyrin G)
AL033381.1	Uncharacterized protein; cDNA FLJ34594 fis, clone KIDNE2009109
EHD4	EH-domain containing 4
ASB4	ankyrin repeat and SOCS box containing 4
C21orf128	chromosome 21 open reading frame 128
WNK3	WNK lysine deficient protein kinase 3
SYNDIG1L	synapse differentiation inducing 1-like
UBQLNL	ubiquilin-like
TCEAL5	transcription elongation factor A (SII)-like 5
PCDHA7	protocadherin alpha 7
PIGX	phosphatidylinositol glycan anchor biosynthesis, class X
PTGS1	prostaglandin-endoperoxide synthase 1 (prostaglandin G/H synthase and cyclooxygenase)
PCDHA3	protocadherin alpha 3
SLC2A10	solute carrier family 2 (facilitated glucose transporter), member 10
ARHGAP32	Rho GTPase activating protein 32
CD160	CD160 molecule
MET	met proto-oncogene
GLYR1	glyoxylate reductase 1 homolog (Arabidopsis)
MMP19	matrix metallopeptidase 19
C5orf28	chromosome 5 open reading frame 28
RUNX1T1	runt-related transcription factor 1; translocated to, 1 (cyclin D-related)
HERPUD2	HERPUD family member 2
PCDHA9	protocadherin alpha 9
SLC6A1	solute carrier family 6 (neurotransmitter transporter), member 1
PCDHA2	protocadherin alpha 2
ARNT2	aryl-hydrocarbon receptor nuclear translocator 2
MTTP	microsomal triglyceride transfer protein
GPR155	G protein-coupled receptor 155
IRF4	interferon regulatory factor 4
PHLPP2	PH domain and leucine rich repeat protein phosphatase 2
ZNF154	zinc finger protein 154
SORD	sorbitol dehydrogenase
GART	phosphoribosylglycinamide formyltransferase, phosphoribosylglycinamide synthetase, phosphoribosylaminoimidazole synthetase
XAF1	XIAP associated factor 1
FRMD6	FERM domain containing 6
EGFR	epidermal growth factor receptor
DGKG	diacylglycerol kinase, gamma 90kDa
AGBL4	ATP/GTP binding protein-like 4
FLRT3	fibronectin leucine rich transmembrane protein 3
ADAMTS19	ADAM metallopeptidase with thrombospondin type 1 motif, 19
CTD-2368P22.1	HCG1811579; Uncharacterized protein
PCDHAC1	protocadherin alpha subfamily C, 1
SCN1A	sodium channel, voltage-gated, type I, alpha subunit
DCHS2	dachsous cadherin-related 2
ADAM12	ADAM metallopeptidase domain 12
C1orf198	chromosome 1 open reading frame 198
UNC13B	unc-13 homolog B (C. elegans)
TNFRSF14	tumor necrosis factor receptor superfamily, member 14
ZNF697	zinc finger protein 697
FCRL2	Fc receptor-like 2
SMARCA2	SWI/SNF related, matrix associated, actin dependent regulator of chromatin, subfamily a, member 2
DRGX	dorsal root ganglia homeobox
MLLT4	myeloid/lymphoid or mixed-lineage leukemia (trithorax homolog, Drosophila); translocated to, 4
ZSCAN23	zinc finger and SCAN domain containing 23
ZNF790	zinc finger protein 790
PHACTR4	phosphatase and actin regulator 4
GJA3	gap junction protein, alpha 3, 46kDa
TEAD2	TEA domain family member 2
ACBD5	acyl-CoA binding domain containing 5
KIAA1257	KIAA1257
SHPRH	SNF2 histone linker PHD RING helicase, E3 ubiquitin protein ligase
PHF20L1	PHD finger protein 20-like 1
DZIP3	DAZ interacting zinc finger protein 3
GOLGA8J	golgin A8 family, member J
ITPRIP	inositol 1,4,5-trisphosphate receptor interacting protein
NPAP1	nuclear pore associated protein 1
GPR158	G protein-coupled receptor 158
ATP1A2	ATPase, Na+/K+ transporting, alpha 2 polypeptide
WDR52	WD repeat domain 52
FNIP2	folliculin interacting protein 2
AWAT2	acyl-CoA wax alcohol acyltransferase 2
SCN3A	sodium channel, voltage-gated, type III, alpha subunit
PCDHA1	protocadherin alpha 1
AC137932.1
PCDHA8	protocadherin alpha 8
KAT6B	K(lysine) acetyltransferase 6B
ZSCAN22	zinc finger and SCAN domain containing 22
SYT9	synaptotagmin IX
VEZF1	vascular endothelial zinc finger 1
TEX26	testis expressed 26
MYOG	myogenin (myogenic factor 4)
MLLT6	myeloid/lymphoid or mixed-lineage leukemia (trithorax homolog, Drosophila); translocated to, 6
DDR1	discoidin domain receptor tyrosine kinase 1
ASPRV1	aspartic peptidase, retroviral-like 1
ENOX2	ecto-NOX disulfide-thiol exchanger 2
GOLGA6D	golgin A6 family, member D
GLIPR1L2	GLI pathogenesis-related 1 like 2
ADAM19	ADAM metallopeptidase domain 19
RP11-247C2.2	HCG2004779; Uncharacterized protein
HIVEP3	human immunodeficiency virus type I enhancer binding protein 3
PAPOLB	poly(A) polymerase beta (testis specific)
F2R	coagulation factor II (thrombin) receptor
PLCXD1	phosphatidylinositol-specific phospholipase C, X domain containing 1
ALPK3	alpha-kinase 3
UBL4A	ubiquitin-like 4A
SLC2A3	solute carrier family 2 (facilitated glucose transporter), member 3
SRSF2	serine/arginine-rich splicing factor 2
MYO3B	myosin IIIB
FREM1	FRAS1 related extracellular matrix 1
TMEM192	transmembrane protein 192
C1QTNF7	C1q and tumor necrosis factor related protein 7
NFAM1	NFAT activating protein with ITAM motif 1
ARRDC3	arrestin domain containing 3
SLC2A14	solute carrier family 2 (facilitated glucose transporter), member 14
PCDHA11	protocadherin alpha 11
PAQR7	progestin and adipoQ receptor family member VII
GPR83	G protein-coupled receptor 83
CEP170	centrosomal protein 170kDa
SAMD8	sterile alpha motif domain containing 8
ATP8B3	ATPase, aminophospholipid transporter, class I, type 8B, member 3
GRHL1	grainyhead-like 1 (Drosophila)
GRHL2	grainyhead-like 2 (Drosophila)
DCX	doublecortin
CYP2U1	cytochrome P450, family 2, subfamily U, polypeptide 1
AMMECR1L	AMMECR1-like
PCDHA4	protocadherin alpha 4
VPS13C	vacuolar protein sorting 13 homolog C (S. cerevisiae)
WDR6	WD repeat domain 6
TRIM37	tripartite motif containing 37
PUM2	pumilio RNA-binding family member 2
METTL7A	methyltransferase like 7A
CD46	CD46 molecule, complement regulatory protein
RP11-1055B8.7	BAH and coiled-coil domain-containing protein 1
RREB1	ras responsive element binding protein 1
MINPP1	multiple inositol-polyphosphate phosphatase 1
MLEC	malectin
TET3	tet methylcytosine dioxygenase 3
ANKRD26	ankyrin repeat domain 26
CRIM1	cysteine rich transmembrane BMP regulator 1 (chordin-like)
[truncated: 1,377 more rows]
