# Supplementary material for: Effects of Cardiac Sympathetic Neurodegeneration and PPARγ Activation on Rhesus Macaque Whole Blood miRNA and mRNA Expression Profiles
Source: Biomed Res Int. 2020 May 2;2020:9426204. doi: 10.1155/2020/9426204 (PMC7212295; doi:10.1155/2020/9426204)
Supplement: Supplementary 3 — Supplementary Table 2: list of genes on the RT2 475 rhesus inflammatory cytokine and receptor PCR array. [file 9426204.f11.xlsx]

## Sheet: Sheet1
Term	Overlap	P-value	Adjusted P-value	Z-score	Combined Score	Genes
Axon guidance_Homo sapiens_hsa04360	36/127	0.000835218	0.131438	-1.77662	12.5924	SEMA5A;ITGB1;SEMA3C;ROCK2;GNAI3;LRRC4;CXCR4;SEMA3E;GNAI1;ROBO1;NRAS;PPP3R1;CFL2;PAK7;MAPK1;SLIT3;SRGAP3;SRGAP2;LRRC4C;EPHB1;EPHB4;PLXNA3;EPHB3;SEMA4A;ARHGEF12;EPHA6;SEMA6A;DCC;LIMK2;SEMA4C;NFATC2;UNC5C;SEMA4F;UNC5D;KRAS;MET
TNF signaling pathway_Homo sapiens_hsa04668	31/110	0.00204271	0.131438	-1.8608	11.5248	TNFAIP3;PIK3CB;PTGS2;CXCL5;PIK3CG;MAPK9;BAG4;RPS6KA5;CASP10;AKT3;MAPK1;RIPK1;JUNB;MAP3K7;MAP3K5;MAP2K6;EDN1;VCAM1;CCL20;TRAF1;MAPK14;MAPK13;MAPK10;CXCL10;CREB1;TAB3;FAS;TAB1;BIRC2;CREB5;BIRC3
cGMP-PKG signaling pathway_Homo sapiens_hsa04022	43/167	0.00232317	0.131438	-1.86464	11.3087	ROCK2;PDE3B;GNAI3;IRS4;ATP2A2;ATP1A2;PIK3CB;GNAI1;PIK3CG;SLC8A1;MYLK4;MYLK;PPP1CB;PPP1CC;RGS2;EDNRA;PPP3R1;PLN;KCNMB1;AKT3;KCNMB2;BDKRB2;MAPK1;PRKG1;GUCY1A3;MEF2A;PPP1R12A;INSR;ATP2B4;NFATC2;ATP1B4;ATP2B2;ATP2B1;CREB1;PLCB4;GNAQ;VDAC2;PDE5A;MRVI1;CALM3;CALM1;SLC25A4;CREB5
FoxO signaling pathway_Homo sapiens_hsa04068	36/133	0.00204159	0.131438	-1.80084	11.1545	PRKAA1;PRKAA2;FOXG1;SETD7;IRS4;PIK3CB;FOXO3;FOXO1;GRM1;EGFR;PIK3CG;CCNB3;CCNB2;MAPK9;NRAS;BCL2L11;AKT3;S1PR1;MAPK1;SMAD2;TGFB2;HOMER2;BNIP3;INSR;FBXO32;MAPK14;SOD2;TGFBR2;MAPK13;MAPK10;C8ORF44-SGK3;SGK3;KRAS;IL7R;SOS1;SGK2
Choline metabolism in cancer_Homo sapiens_hsa05231	28/101	0.0042159	0.131438	-1.83118	10.0145	DGKG;DGKE;DGKB;PDGFB;PIK3CB;PLD1;HIF1A;EGFR;PIK3CG;MAPK9;NRAS;AKT3;PDGFC;MAPK1;WASF2;WASF3;PCYT1B;PCYT1A;PLA2G4D;TSC1;GPCPD1;MAPK10;SLC5A7;SP1;PPAP2B;KRAS;SOS1;DGKI
Retrograde endocannabinoid signaling_Homo sapiens_hsa04723	28/101	0.0042159	0.131438	-1.79744	9.83	GABRB3;GRIA2;GABRB2;GABRB1;DAGLA;GNAI3;PTGS2;GNAI1;GRM1;GABRR2;MAPK9;GNG2;CNR1;MAPK1;PRKACB;KCNJ3;GABRA2;GABRA1;GABRA4;GABRA3;MAPK14;MAPK13;MAPK10;PLCB4;GNAQ;GNB4;NAPEPLD;MGLL
Proteoglycans in cancer_Homo sapiens_hsa05205	49/203	0.00494381	0.131438	-1.80627	9.59061	ITGB1;WNT2B;ITGB3;PIK3CB;FGF2;ELK1;PIK3CG;PPP1CB;PPP1CC;MYC;AKT3;ITGAV;PRKACB;ARHGEF12;PPP1R12A;PLAUR;GAB1;RRAS2;FRS2;ANK3;WNT16;PPP1R12B;SOS1;MET;CD44;ROCK2;SDC2;TWIST1;CBL;HOXD10;HIF1A;EGFR;NRAS;ERBB3;MAPK1;DROSHA;FLNB;CAMK2G;SMAD2;TGFB2;FZD3;FZD5;CAV2;RDX;MAPK14;ESR1;MAPK13;FAS;KRAS
cAMP signaling pathway_Homo sapiens_hsa04024	48/199	0.00543931	0.131438	-1.68608	8.79139	HCN4;GRIA2;ADCYAP1R1;SUCNR1;ROCK2;HHIP;PDE3B;GNAI3;ATP2A2;ATP1A2;PIK3CB;PLD1;MLLT4;GNAI1;PIK3CG;GLI3;PPP1CB;PPP1CC;MAPK9;EDNRA;GRIN2A;PLN;AKT3;MAPK1;PRKACB;CAMK2G;GHSR;PPP1R12A;BDNF;F2R;ATP2B4;NPY1R;RRAS2;ATP1B4;ATP2B2;ATP2B1;SSTR2;GRIN2B;TSHR;MAPK10;CREB1;GRIN3A;ACOX1;CAMK4;GNAS;CALM3;CALM1;CREB5
Insulin signaling pathway_Homo sapiens_hsa04910	36/139	0.0045294	0.131438	-1.62492	8.76997	SHC4;PRKAA1;PRKAA2;SHC3;PDE3B;IRS4;PIK3CB;CBL;ELK1;FOXO1;PIK3CG;PPP1CB;PPP1CC;MAPK9;NRAS;AKT3;PHKG2;MAPK1;PRKACB;EIF4E;PPARGC1A;SOCS4;PRKCI;INSR;TSC1;PHKB;MAPK10;PPP1R3C;PPP1R3B;PRKAR1A;PPP1R3E;PPP1R3D;KRAS;CALM3;CALM1;SOS1
Regulation of actin cytoskeleton_Homo sapiens_hsa04810	51/214	0.00549568	0.131438	-1.64886	8.58031	ITGB1;CHRM3;ITGAM;ITGB3;PIK3CB;FGF2;PIK3CG;MYLK4;MYLK;PPP1CB;PPP1CC;FGF9;CFL2;BDKRB2;ITGB8;ITGAV;ARHGEF12;PPP1R12A;ACTN1;F2R;RRAS2;F2;ITGA6;PPP1R12B;SOS1;VCL;PFN2;ARHGEF6;ROCK2;PDGFB;IQGAP2;EGFR;NRAS;PDGFC;PAK7;MAPK1;WASF2;MYH10;LIMK2;RDX;SSH2;SSH1;PIKFYVE;DIAPH2;ABI2;ARPC2;APC;KRAS;FGF13;FGF12;FGF10
Gap junction_Homo sapiens_hsa04540	25/88	0.00469796	0.131438	-1.59368	8.54312	TUBAL3;GNAI3;LPAR1;PDGFB;HTR2C;GNAI1;GRM1;EGFR;NRAS;GJA1;PDGFC;MAPK1;PRKACB;PRKG1;GUCY1A3;MAP3K2;TUBB;GJD2;TJP1;TUBB2B;PLCB4;GNAQ;GNAS;KRAS;SOS1
Estrogen signaling pathway_Homo sapiens_hsa04915	27/99	0.00621271	0.13196	-1.58615	8.0595	SHC4;SHC3;GNAI3;PIK3CB;GNAI1;GRM1;EGFR;PIK3CG;HSP90B1;NRAS;AKT3;MAPK1;PRKACB;KCNJ3;HSPA2;ESR1;CREB1;PLCB4;SP1;GNAQ;GNAS;KRAS;CALM3;CALM1;SOS1;CREB5;FKBP5
Oxytocin signaling pathway_Homo sapiens_hsa04921	39/158	0.0076778	0.146902	-1.60509	7.81584	PRKAA1;PRKAA2;ROCK2;GNAI3;PIK3CB;PTGS2;ELK1;GNAI1;EGFR;PIK3CG;CAMKK2;MYLK4;MYLK;PPP1CB;PPP1CC;RGS2;NRAS;CACNG8;PPP3R1;MAPK1;PRKACB;CAMK2G;KCNJ2;KCNJ3;GUCY1A3;CAMK1D;PPP1R12A;PLA2G4D;NFATC2;CACNB2;RCAN1;PLCB4;CAMK4;GNAQ;GNAS;KRAS;CALM3;PPP1R12B;CALM1
Pertussis_Homo sapiens_hsa05133	22/75	0.00510065	0.131438	-1.44753	7.6406	ITGB1;CXCL6;ITGAM;TICAM2;C1S;GNAI3;IRAK4;MAPK14;GNAI1;CXCL5;TIRAP;MAPK13;MAPK10;MAPK9;IL23A;TRAF6;CFL2;IRF8;MAPK1;CALM3;CALM1;MYD88
Thyroid hormone signaling pathway_Homo sapiens_hsa04919	31/118	0.0064371	0.13196	-1.51277	7.63296	NOTCH2;HDAC2;THRB;ITGB3;ATP2A2;ATP1A2;PIK3CB;HIF1A;FOXO1;PIK3CG;NRAS;PLN;MED13;MYC;AKT3;MAPK1;ITGAV;PRKACB;NCOA1;NCOA2;MED1;ATP1B4;SLC16A10;MED4;ESR1;MED13L;BMP4;RCAN1;KAT2B;PLCB4;KRAS
Neurotrophin signaling pathway_Homo sapiens_hsa04722	31/120	0.00832186	0.149273	-1.48677	7.11997	SHC4;SHC3;PIK3CB;PSEN1;FOXO3;PIK3CG;RPS6KA3;MAPK9;NRAS;RPS6KA6;RPS6KA5;AKT3;MAPK1;CAMK2G;MAP3K5;MAP3K1;BDNF;GAB1;FRS2;IRAK3;IRAK4;MAPK14;MAPK13;MAPK10;TRAF6;CAMK4;BCL2;KRAS;CALM3;CALM1;SOS1
Rap1 signaling pathway_Homo sapiens_hsa04015	49/211	0.0105705	0.157184	-1.50907	6.86577	ITGB1;ITGAM;ITGB3;CTNND1;PIK3CB;FGF2;PIK3CG;SIPA1L1;FGF9;AKT3;MAGI1;PRKCI;MAGI3;F2R;PLCB4;RAPGEF2;PRKD1;MET;PFN2;GNAI3;LPAR1;PDGFB;PARD6G;MLLT4;GNAI1;EGFR;FYB;NRAS;GRIN2A;CNR1;PDGFC;P2RY1;KRIT1;MAPK1;MAP2K6;ANGPT1;INSR;MAPK14;GRIN2B;MAPK13;GNAQ;GNAS;KRAS;CALM3;TEK;FGF13;CALM1;FGF12;FGF10
Regulation of lipolysis in adipocytes_Homo sapiens_hsa04923	17/56	0.0089894	0.151762	-1.32139	6.22602	INSR;PDE3B;GNAI3;NPY1R;IRS4;PIK3CB;PTGS2;TSHR;GNAI1;PIK3CG;PTGS1;PLA2G16;AKT3;GNAS;PRKACB;MGLL;PRKG1
Adrenergic signaling in cardiomyocytes_Homo sapiens_hsa04261	36/148	0.0127545	0.167449	-1.35958	5.93031	GNAI3;ATP2A2;ATP1A2;PIK3CB;GNAI1;PIK3CG;SLC8A1;PPP1CB;PPP1CC;CACNG8;RPS6KA5;PLN;PPP2R5E;AKT3;SCN7A;MAPK1;PRKACB;CAMK2G;TPM3;ATP2B4;ATP1B4;ATP2B2;ATP2B1;MAPK14;MAPK13;CACNB2;CREB1;PLCB4;PPP2R2B;GNAQ;BCL2;GNAS;CALM3;AGTR2;CALM1;CREB5
Long-term potentiation_Homo sapiens_hsa04720	19/66	0.0109536	0.157184	-1.21949	5.50489	GRIA2;GRIN2B;GRM1;PPP1CB;PPP1CC;RPS6KA3;NRAS;RPS6KA6;PPP3R1;GRIN2A;PLCB4;CAMK4;GNAQ;MAPK1;KRAS;CALM3;CALM1;PRKACB;CAMK2G
Spliceosome_Homo sapiens_hsa03040	33/134	0.0138235	0.172493	-1.25433	5.37025	SF3B3;RBM8A;SRSF1;SNRPD1;TRA2B;SNRPB2;SNRPD3;HNRNPA1;TXNL4A;SF3B1;SRSF10;BCAS2;PPIL1;PRPF38A;NCBP2;CDC5L;PRPF40A;PLRG1;THOC2;HSPA2;MAGOHB;WBP11;U2SURP;CHERP;HNRNPK;RBMXL1;SRSF2;SNRNP27;SRSF3;SNRPE;SRSF5;SLU7;RBM22
Hippo signaling pathway_Homo sapiens_hsa04390	37/153	0.0128358	0.167449	-1.23133	5.36307	YAP1;CRB1;WNT2B;PARD6G;CTGF;SAV1;PPP1CB;PPP1CC;MYC;TP53BP2;CTNNA3;BTRC;TEAD1;YWHAG;TEAD2;SMAD2;TGFB2;PRKCI;FZD3;FZD5;WNT16;GDF5;INADL;YWHAZ;BMP5;TGFBR2;BMP4;MOB1B;MOB1A;DLG2;FRMD6;APC;PPP2R2B;BIRC5;BIRC2;LLGL1;BMPR1A
Sphingolipid signaling pathway_Homo sapiens_hsa04071	30/120	0.0148659	0.177771	-1.18479	4.98641	ASAH1;ASAH2;ROCK2;GNAI3;SGMS2;PIK3CB;PLD1;GNAI1;PIK3CG;MAPK9;NRAS;SPTLC3;PPP2R5E;AKT3;S1PR1;BDKRB2;MAPK1;S1PR2;MAP3K5;CERS3;CERS4;CERS6;MAPK14;MAPK13;MAPK10;PLCB4;PPP2R2B;GNAQ;BCL2;KRAS
Longevity regulating pathway - multiple species_Homo sapiens_hsa04213	18/64	0.0166463	0.191099	-1.10726	4.53485	HDAC2;PRKAA1;PRKAA2;CLPB;INSR;IRS4;PIK3CB;HSPA2;FOXO3;SOD2;FOXO1;PIK3CG;NRAS;AKT3;EIF4EBP2;KRAS;PRKACB;ATG5
Gastric acid secretion_Homo sapiens_hsa04971	20/74	0.0186627	0.194953	-1.12791	4.49048	CHRM3;KCNJ10;GNAI3;KCNJ15;ATP1B4;ATP1A2;SSTR2;GNAI1;MYLK4;MYLK;SLC9A4;PLCB4;GNAQ;GNAS;SLC26A7;CALM3;CALM1;PRKACB;CAMK2G;KCNJ2
GABAergic synapse_Homo sapiens_hsa04727	23/88	0.0182921	0.194953	-1.10129	4.40657	GABRA2;GABRB3;NSF;GABRB2;GABRA1;SLC38A1;GABRB1;PLCL1;GAD1;GABRA4;GABRA3;GNAI3;GAD2;SLC6A11;SLC6A1;GNAI1;GLS;GABRR2;GNG2;GNB4;HAP1;PRKACB;SLC38A2
Longevity regulating pathway - mammal_Homo sapiens_hsa04211	24/94	0.0213712	0.211501	-1.10901	4.26494	PRKAA1;PRKAA2;INSR;IRS4;TSC1;PIK3CB;FOXO3;SOD2;FOXO1;PIK3CG;CAMKK2;NRAS;CREB1;CAMK4;AKT3;ULK2;ULK1;KRAS;PRKACB;EIF4E;PPARGC1A;CREB5;ATG5;APPL1
Ubiquitin mediated proteolysis_Homo sapiens_hsa04120	33/137	0.0190198	0.194953	-1.00291	3.97381	UBA6;XIAP;UBE2D1;NEDD4L;UBE3A;UBE3B;BRCA1;RCHY1;CBL;HERC4;BTRC;UBE2H;MAP3K1;SYVN1;UBE2QL1;UBE2E2;UBE2A;UBE2G2;PIAS2;PIAS1;KLHL9;CUL4A;UBE2R2;TRAF6;UBE2N;UBA2;TRIM37;TRIP12;TRIM32;UBE2K;ANAPC1;BIRC2;BIRC3
Platelet activation_Homo sapiens_hsa04611	29/122	0.0313527	0.262449	-1.07182	3.71113	ITGB1;ROCK2;ITGB3;GNAI3;PIK3CB;GNAI1;PIK3CG;PTGS1;MYLK4;MYLK;PPP1CB;PPP1CC;AKT3;P2RY1;MAPK1;PRKACB;PRKG1;GUCY1A3;PRKCI;ARHGEF12;PPP1R12A;PLA2G4D;FGG;F2R;MAPK14;MAPK13;PLCB4;GNAQ;GNAS
Ras signaling pathway_Homo sapiens_hsa04014	49/227	0.0375141	0.265687	-0.999823	3.28246	PIK3CB;FGF2;ELK1;PIK3CG;TBK1;FGF9;AKT3;PRKACB;PLA2G12A;PLA2G4D;GAB1;RRAS2;KSR2;PLA2G16;RASA4;SOS1;MET;SHC4;SHC3;PDGFB;RASAL2;PLD1;MLLT4;EGFR;MAPK9;NRAS;GRIN2A;GNG2;PDGFC;PAK7;MAPK1;BRAP;PLA2G2D;ANGPT1;INSR;GRIN2B;MAPK10;GNB4;NF1;REL;KRAS;CALM3;TEK;RGL1;FGF13;CALM1;FGF12;RAB5A;FGF10
mRNA surveillance pathway_Homo sapiens_hsa03015	23/91	0.0267448	0.247606	-0.889768	3.22222	HBS1L;SMG1;CPSF7;CPSF6;RBM8A;NCBP2;RNMT;PABPC5;CSTF2;SSU72;CSTF2T;MSI2;MAGOHB;GSPT1;PPP1CB;PPP1CC;NUDT21;PPP2R5E;PPP2R2B;PABPC4L;ETF1;PAPOLB;PABPC1
Colorectal cancer_Homo sapiens_hsa05210	17/62	0.0250184	0.239343	-0.862503	3.18103	SMAD2;TGFB2;DCC;PIK3CB;PIK3CG;TGFBR2;MAPK10;MAPK9;APC;MSH3;MYC;AKT3;BCL2;BIRC5;MAPK1;KRAS;APPL1
Toxoplasmosis_Homo sapiens_hsa05145	28/118	0.034664	0.262449	-0.928372	3.12123	ITGB1;CD40;GNAI3;XIAP;PIK3CB;GNAI1;PIK3CG;MAPK9;AKT3;MAPK1;MAP3K7;MAP2K6;TGFB2;HSPA2;IRAK4;MAPK14;MAPK13;MAPK10;IFNG;TRAF6;BCL2;HLA-DPB1;ITGA6;TAB1;BIRC2;MYD88;BIRC3;HLA-DQB1
Phosphatidylinositol signaling system_Homo sapiens_hsa04070	24/98	0.034183	0.262449	-0.869063	2.93398	CDS1;DGKG;DGKE;INPP1;DGKB;IPMK;MTMR8;PIK3CB;SYNJ2;PIK3C2A;PIK3CG;MTMR7;INPP4A;INPP4B;PIKFYVE;INPP5A;PLCB4;PPIP5K2;INPP5E;CALM3;PIK3C3;CALM1;DGKI;PI4K2A
Focal adhesion_Homo sapiens_hsa04510	44/202	0.0408438	0.272608	-0.865896	2.76914	SHC4;ITGB1;SHC3;ROCK2;ITGB3;PDGFB;XIAP;PIK3CB;THBS2;ELK1;EGFR;PIK3CG;THBS4;MYLK4;MYLK;PPP1CB;PPP1CC;MAPK9;AKT3;PDGFC;CAPN2;PAK7;TNR;ITGB8;MAPK1;ITGAV;FLNB;PPP1R12A;CAV2;ACTN1;PARVA;MAPK10;COL4A1;COL4A3;COL9A1;BCL2;COL6A3;ITGA6;PPP1R12B;SOS1;MET;BIRC2;VCL;BIRC3
Dorso-ventral axis formation_Homo sapiens_hsa04320	10/27	0.00964646	0.153807	-0.58964	2.73661	NOTCH2;PIWIL2;MAPK1;SPIRE1;KRAS;SOS1;CPEB3;CPEB2;EGFR;CPEB4
Dopaminergic synapse_Homo sapiens_hsa04728	30/129	0.0379553	0.265687	-0.826418	2.7035	GRIA2;MAOA;GNAI3;GNAI1;PPP1CB;PPP1CC;MAPK9;GRIN2A;GNG2;KIF5C;PPP2R5E;KIF5B;AKT3;PRKACB;CAMK2G;KCNJ3;SCN1A;MAPK14;GRIN2B;MAPK13;MAPK10;CREB1;PLCB4;PPP2R2B;GNAQ;GNAS;GNB4;CALM3;CALM1;CREB5
Endocytosis_Homo sapiens_hsa04144	54/259	0.0535788	0.297472	-0.734556	2.14975	VPS29;TFRC;WIPF1;WIPF2;RAB22A;KIF5C;KIF5B;PSD3;SH3GL2;SH3GLB1;USP8;PRKCI;F2R;VPS37B;HLA-A;TGFBR2;DNM3;EPN3;ACAP2;TRAF6;STAMBP;MET;VPS4A;CXCR4;PARD6G;NEDD4L;ASAP2;PLD1;CBL;EGFR;SNX4;SNX2;ERBB3;ADRBK2;GRK4;RAB11FIP2;SNX6;ARFGEF1;SMAD2;TGFB2;RAB4A;IQSEC1;CAV2;VTA1;IQSEC3;STAM;AP2B1;HSPA2;RAB10;EHD4;ARPC2;CHMP2B;SMAP2;RAB5A
Renin secretion_Homo sapiens_hsa04924	17/64	0.0335226	0.262449	-0.628993	2.13577	GUCY1A3;PTGER4;ADCYAP1R1;PDE1C;PDE3B;GNAI3;GNAI1;EDNRA;PPP3R1;CREB1;PLCB4;GNAQ;GNAS;CALM3;CALM1;PRKACB;KCNJ2
Toll-like receptor signaling pathway_Homo sapiens_hsa04620	25/106	0.0469744	0.289923	-0.678897	2.07617	CD40;CCL4L1;PIK3CB;PIK3CG;MAPK9;TBK1;AKT3;MAPK1;RIPK1;MAP3K7;MAP2K6;TICAM2;IRAK4;MAPK14;TIRAP;MAPK13;MAPK10;CXCL10;TRAF6;TLR8;TLR6;TAB1;TLR3;MYD88;IFNAR1
GnRH signaling pathway_Homo sapiens_hsa04912	22/91	0.0469107	0.289923	-0.653598	1.99969	MAP3K2;MAP3K1;PLA2G4D;PLD1;MAPK14;ELK1;EGFR;MAPK13;MAPK10;MAPK9;NRAS;PLCB4;GNAQ;GNAS;MAPK1;KRAS;CALM3;CALM1;SOS1;PRKACB;CAMK2G;MAP2K6
Adherens junction_Homo sapiens_hsa04520	19/74	0.0356639	0.262449	-0.593046	1.97699	SMAD2;YES1;INSR;ACTN1;CTNND1;MLLT4;EGFR;TGFBR2;TJP1;FER;SNAI1;MAPK1;CTNNA3;SSX2IP;MAP3K7;WASF2;MET;WASF3;VCL
Pathways in cancer_Homo sapiens_hsa05200	79/397	0.0615808	0.311965	-0.641642	1.78852	ITGB1;WNT2B;HHIP;PIK3CB;FGF2;PIK3CG;GLI3;EDNRA;FGF9;MYC;AKT3;BDKRB2;ITGAV;PRKACB;APPL1;ARHGEF12;TPM3;DCC;F2R;TRAF1;WNT16;PIAS2;TGFBR2;RUNX1;AR;PLCB4;COL4A1;MSH3;TRAF6;COL4A3;BIRC5;ITGA6;SOS1;MET;BIRC2;BIRC3;PTGER4;HDAC2;ROCK2;GNAI3;LPAR1;PDGFB;CXCR4;XIAP;KLK3;PTGS2;PLD1;CBL;HIF1A;FOXO1;GNAI1;EGFR;HSP90B1;MAPK9;NRAS;GNG2;TPR;MAPK1;CTNNA3;RUNX1T1;SMAD2;ARNT2;TGFB2;FZD3;FZD5;MAPK10;BMP4;CDK6;APC;GNA…
Serotonergic synapse_Homo sapiens_hsa04726	26/112	0.0515282	0.297472	-0.561048	1.66386	GABRB3;GABRB2;APP;GABRB1;TPH1;MAOA;ALOX15;GNAI3;HTR2C;PTGS2;CYP2C19;GNAI1;PTGS1;NRAS;GNG2;MAPK1;PRKACB;KCNJ3;PLA2G4D;TRPC1;CYP2C8;PLCB4;GNAQ;GNAS;GNB4;KRAS
Transcriptional misregulation in cancer_Homo sapiens_hsa05202	39/180	0.0553027	0.299373	-0.524853	1.51941	CD40;HDAC2;CCNT2;ITGAM;CCNT1;KMT2A;JMJD1C;SIX1;MLLT3;FOXO1;AFF1;HOXA10;HOXA9;SIX4;MYC;CCR7;WHSC1;RUNX1T1;ARNT2;TAF15;H3F3B;EYA1;FUS;HMGA2;ETV1;TRAF1;PAX5;WNT16;MLF1;RUNX2;TGFBR2;RUNX1;MEIS1;MAF;SP1;BMP2K;REL;MET;BIRC3
Phospholipase D signaling pathway_Homo sapiens_hsa04072	32/144	0.0574279	0.299669	-0.520429	1.48698	SHC4;DGKG;PTGFR;DGKE;SHC3;DGKB;LPAR1;PDGFB;PIK3CB;PLD1;GRM1;EGFR;PIK3CG;AGPAT4;NRAS;AKT3;PDGFC;MAPK1;PLA2G4D;INSR;F2R;GAB1;RRAS2;TSC1;AVPR1A;DNM3;PLCB4;PPAP2B;GNAS;KRAS;SOS1;DGKI
Inositol phosphate metabolism_Homo sapiens_hsa00562	18/71	0.0449561	0.289923	-0.45122	1.39972	INPP1;IPMK;MTMR8;PIK3CB;SYNJ2;PIK3C2A;PIK3CG;MTMR7;INPP4A;INPP4B;MINPP1;ALDH6A1;PIKFYVE;INPP5A;PLCB4;INPP5E;PIK3C3;PI4K2A
Prolactin signaling pathway_Homo sapiens_hsa04917	18/72	0.0508268	0.297472	-0.384341	1.14508	SHC4;SHC3;PIK3CB;FOXO3;MAPK14;ESR1;PRLR;PIK3CG;MAPK13;MAPK10;MAPK9;NRAS;AKT3;MAPK1;KRAS;SOS1;SOCS7;SOCS4
Glutamatergic synapse_Homo sapiens_hsa04724	26/114	0.0619582	0.311965	-0.402426	1.11927	GRIA2;SLC1A1;GNAI3;PLD1;GNAI1;GRM1;GLS;PPP3R1;GRIN2A;GNG2;ADRBK2;MAPK1;PRKACB;SLC38A2;KCNJ3;SLC38A1;PLA2G4D;HOMER2;TRPC1;GRIN2B;PLCB4;GRIN3A;GNAQ;GNAS;GNB4;SHANK2
AGE-RAGE signaling pathway in diabetic complications_Homo sapiens_hsa04933	23/101	0.0766457	0.360612	-0.345657	0.887841	SMAD2;TGFB2;EDN1;VCAM1;CYBB;PIK3CB;MAPK14;F3;FOXO1;PIK3CG;TGFBR2;MAPK13;MAPK10;MAPK9;NRAS;PLCB4;COL4A1;COL4A3;AKT3;BCL2;MAPK1;KRAS;NOX1
Vascular smooth muscle contraction_Homo sapiens_hsa04270	27/120	0.066852	0.325195	-0.296956	0.803348	CALCRL;ROCK2;MYLK4;MYLK;PPP1CB;PPP1CC;EDNRA;CALD1;KCNMB1;KCNMB2;MAPK1;PRKACB;PRKG1;GUCY1A3;PLA2G12A;PLA2G2D;ARHGEF12;PPP1R12A;PLA2G4D;AVPR1A;PLCB4;GNAQ;GNAS;MRVI1;CALM3;PPP1R12B;CALM1
Chagas disease (American trypanosomiasis)_Homo sapiens_hsa05142	24/104	0.0631161	0.312316	-0.283103	0.782151	SMAD2;TGFB2;GNAI3;PIK3CB;IRAK4;MAPK14;GNAI1;PIK3CG;TGFBR2;MAPK13;MAPK10;MAPK9;PLCB4;IFNG;PPP2R2B;TRAF6;GNAQ;AKT3;GNAS;BDKRB2;MAPK1;FAS;TLR6;MYD88
Nicotine addiction_Homo sapiens_hsa05033	12/40	0.028369	0.254434	-0.188458	0.671374	GABRA2;GABRB3;GRIA2;GABRR2;GABRB2;GABRA1;GABRB1;GRIN2A;GRIN3A;GABRA4;GABRA3;GRIN2B
Circadian entrainment_Homo sapiens_hsa04713	22/95	0.0704955	0.337203	-0.212567	0.563771	GUCY1A3;GRIA2;ADCYAP1R1;GNAI3;GRIN2B;GNAI1;GRIN2A;RPS6KA5;CREB1;PLCB4;PER3;GNG2;GNAQ;GNAS;GNB4;MAPK1;CALM3;CALM1;PRKACB;CAMK2G;PRKG1;KCNJ3
Progesterone-mediated oocyte maturation_Homo sapiens_hsa04914	22/98	0.0927745	0.409121	-0.149663	0.355836	PDE3B;GNAI3;PIK3CB;MAPK14;GNAI1;PIK3CG;MAPK13;MAPK10;CCNB3;CCNB2;RPS6KA3;MAPK9;RPS6KA6;AKT3;MAPK1;KRAS;PGR;CPEB3;PRKACB;CPEB2;ANAPC1;CPEB4
Calcium signaling pathway_Homo sapiens_hsa04020	37/180	0.111761	0.426728	-0.11774	0.258015	PTGFR;CHRM3;PDE1C;ATP2A2;HTR2C;GRM1;EGFR;SLC8A1;MYLK4;MYLK;EDNRA;CYSLTR1;PPP3R1;GRIN2A;PLN;CYSLTR2;ERBB3;PHKG2;BDKRB2;PRKACB;CAMK2G;F2R;ATP2B4;ATP2B2;PHKB;ATP2B1;AVPR1A;P2RX7;PLCB4;STIM2;CAMK4;GNAQ;GNAS;VDAC2;CALM3;CALM1;SLC25A4
Signaling pathways regulating pluripotency of stem cells_Homo sapiens_hsa04550	30/142	0.10829	0.426728	-0.107665	0.239334	WNT2B;RIF1;ONECUT1;PIK3CB;FGF2;PIK3CG;NRAS;ACVR1C;MYC;AKT3;SMARCAD1;MAPK1;ACVR1;SMAD2;FZD3;FZD5;PCGF5;PCGF3;PAX6;INHBA;WNT16;MAPK14;ACVR2A;MAPK13;BMP4;MEIS1;APC;KAT6A;KRAS;BMPR1A
Epstein-Barr virus infection_Homo sapiens_hsa05169	41/202	0.114159	0.426728	-0.095485	0.207218	CD40;HDAC2;TNFAIP3;PIK3CB;PIK3CG;MAPK9;TBK1;MYC;AKT3;POLR2D;PSMD1;POLR2F;RIPK1;CD58;PRKACB;MAP3K7;YWHAG;MAP2K6;ENTPD1;EIF2AK2;TRAF1;HSPA2;HLA-A;MAPK14;YWHAZ;MAPK13;MAPK10;POLR3A;IFNG;PSMC4;POLR3D;TRAF6;POLR3E;BCL2;POLR3F;HLA-DPB1;POLR3G;TAB1;POLR3K;CD44;HLA-DQB1
Olfactory transduction_Homo sapiens_hsa04740	12/415	1	1	4.76686	-1.42828e-09	OR5T1;OR2C3;RGS2;PDE1C;ADRBK2;CALM3;OR11A1;CALM1;PRKACB;CAMK2G;SLC8A1;PRKG1
Oxidative phosphorylation_Homo sapiens_hsa00190	11/133	0.99868	1	5.55223	-0.00733555	COX15;NDUFB5;NDUFAB1;ATP5A1;COX11;NDUFS1;ATP5G1;NDUFC2-KCTD14;ATP6V1C1;COX6B1;ATP6V1C2
Parkinson's disease_Homo sapiens_hsa05012	14/142	0.993697	1	4.95231	-0.0313127	APAF1;NDUFB5;ATP5A1;GNAI3;UBE2G2;ATP5G1;NDUFC2-KCTD14;GNAI1;COX6B1;NDUFAB1;VDAC2;NDUFS1;PRKACB;SLC25A4
MicroRNAs in cancer_Homo sapiens_hsa05206	36/297	0.990924	1	4.85566	-0.0442736	SHC4;NOTCH2;ABCB1;ITGB3;PDGFB;BRCA1;PTGS2;HOXD10;EGFR;GLS;NRAS;RPS6KA5;BCL2L11;ERBB3;MYC;IGF2BP1;TNR;MAPK1;CYP1B1;TP63;TGFB2;FZD3;RDX;HMGA2;DICER1;SERPINB5;FOXP1;CDK6;HNRNPK;APC;BCL2;MDM4;KRAS;SOS1;MET;CD44
Galactose metabolism_Homo sapiens_hsa00052	1/30	0.996102	1	15.2364	-0.0595038	UGP2
NOD-like receptor signaling pathway_Homo sapiens_hsa04621	15/57	0.0474786	0.289923	0.0195823	-0.0596765	TNFAIP3;MAPK14;HSP90B1;MAPK13;MAPK10;MAPK9;TRAF6;TAB3;MAPK1;SUGT1;TAB1;MAP3K7;BIRC2;NAIP;BIRC3
Carbon metabolism_Homo sapiens_hsa01200	11/113	0.988958	1	5.50624	-0.0611397	RPIA;PRPS2;ALDH6A1;IDH1;RPE;PGK1;SUCLG2;ACO1;PDHB;ME2;PSPH
Arginine and proline metabolism_Homo sapiens_hsa00330	3/50	0.994054	1	11.0741	-0.0660418	P4HA1;MAOA;ALDH7A1
Glyoxylate and dicarboxylate metabolism_Homo sapiens_hsa00630	1/28	0.994356	1	17.6341	-0.0998003	ACO1
Non-alcoholic fatty liver disease (NAFLD)_Homo sapiens_hsa04932	17/151	0.979338	1	5.1927	-0.108416	PRKAA1;PRKAA2;NDUFB5;INSR;PIK3CB;NDUFC2-KCTD14;PIK3CG;COX6B1;MAPK10;MAPK9;BCL2L11;AKT3;NDUFAB1;MLX;FAS;NDUFS1;MAP3K5
Natural killer cell mediated cytotoxicity_Homo sapiens_hsa04650	15/135	0.976741	1	5.14476	-0.121077	SHC4;SHC3;NFATC2;PIK3CB;HLA-A;PIK3CG;NRAS;PPP3R1;IFNG;SH3BP2;MAPK1;FAS;KRAS;SOS1;IFNAR1
Ribosome biogenesis in eukaryotes_Homo sapiens_hsa03008	9/89	0.974189	1	6.58338	-0.172157	RCL1;NOP58;UTP6;WDR36;GNL3L;WDR75;DROSHA;EFTUD1;UTP14C
Ribosome_Homo sapiens_hsa03010	16/137	0.964439	1	4.79874	-0.173755	RPL36A-HNRNPH2;MRPS14;MRPL19;MRPS21;MRPL17;RPL35A;MRPL34;RPL9;MRPL13;RPL3L;RPL7;MRPL3;MRPL2;RPL37A;RPL28;RPS24
Proteasome_Homo sapiens_hsa03050	3/44	0.98567	1	12.6523	-0.182618	IFNG;PSMC4;PSMD1
Mineral absorption_Homo sapiens_hsa04978	14/51	0.0392757	0.268384	0.0576579	-0.186647	SLC31A1;SLC11A2;ATP1B4;ATP1A2;SLC5A1;ATP2B1;ATOX1;SLC8A1;MT1A;HEPH;TRPM7;SLC26A9;STEAP2;TRPM6
NF-kappa B signaling pathway_Homo sapiens_hsa04064	21/93	0.0940835	0.409121	0.0799484	-0.188964	CCL13;CD40;VCAM1;TICAM2;CCL4L1;XIAP;TNFAIP3;TRAF1;IRAK4;PTGS2;TIRAP;TRAF6;BCL2;TAB3;RIPK1;TAB1;LTB;MAP3K7;BIRC2;MYD88;BIRC3
Glycolysis / Gluconeogenesis_Homo sapiens_hsa00010	6/67	0.978588	1	8.75177	-0.189428	ALDH1A3;MINPP1;PGK1;PDHB;ALDH7A1;ADH6
Cholinergic synapse_Homo sapiens_hsa04725	24/111	0.114488	0.426728	0.108968	-0.236165	CHRM3;GNAI3;PIK3CB;GNAI1;PIK3CG;SLC5A7;NRAS;CREB1;PLCB4;GNG2;CAMK4;GNAQ;AKT3;BCL2;GNB4;KCNQ3;MAPK1;KCNQ5;KRAS;PRKACB;CAMK2G;KCNJ2;KCNJ3;CREB5
Cardiac muscle contraction_Homo sapiens_hsa04260	8/78	0.963985	1	6.84432	-0.251048	CACNB2;CACNG8;TPM3;ATP2A2;ATP1B4;ATP1A2;SLC8A1;COX6B1
Lysosome_Homo sapiens_hsa04142	15/123	0.939497	1	4.85755	-0.303165	SCARB2;CD164;ASAH1;SLC11A2;AP4E1;AP3B1;GNS;LIPA;CTSS;MFSD8;AP3M2;CTSO;GM2A;IDS;ARSB
Systemic lupus erythematosus_Homo sapiens_hsa05322	17/135	0.930564	1	4.74745	-0.341645	CD40;H3F3B;C1S;ACTN1;H2AFV;C8A;GRIN2B;HIST2H2BE;GRIN2A;IFNG;SNRPD1;HIST1H2BF;HLA-DPB1;HIST1H2BH;SNRPD3;HIST1H2BG;HLA-DQB1
Pyruvate metabolism_Homo sapiens_hsa00620	3/40	0.974657	1	14.5112	-0.372495	PDHB;ME2;ALDH7A1
TGF-beta signaling pathway_Homo sapiens_hsa04350	19/84	0.105838	0.426728	0.185991	-0.417707	ACVR1;SMAD2;TGFB2;INHBA;GDF5;LTBP1;ACVR2A;BMP5;TGFBR2;BMP4;ACVR1C;RBL1;TFDP1;IFNG;SP1;BAMBI;MYC;MAPK1;BMPR1A
Metabolism of xenobiotics by cytochrome P450_Homo sapiens_hsa00980	8/73	0.941147	1	7.09704	-0.430479	HSD11B1;UGT2B10;ALDH1A3;GSTK1;GSTO2;CYP1B1;UGT2B4;ADH6
MAPK signaling pathway_Homo sapiens_hsa04010	49/255	0.177343	0.565526	0.26813	-0.463776	FGF2;ELK1;RPS6KA3;RPS6KA6;RPS6KA5;FGF9;MYC;AKT3;PRKACB;MAP3K7;MAP3K5;DUSP2;DUSP3;PLA2G4D;RRAS2;TGFBR2;CACNB2;PPM1A;TRAF6;RAPGEF2;SOS1;PDGFB;EGFR;MAPK9;NRAS;CACNG8;PPP3R1;MAPK1;FLNB;MAP2K6;MAP3K2;TGFB2;MAP3K1;BDNF;HSPA2;MAPK14;MAPK13;MAPK10;NR4A1;TAOK3;TAOK1;NF1;FAS;KRAS;TAB1;FGF13;PTPN5;FGF12;FGF10
Glucagon signaling pathway_Homo sapiens_hsa04922	22/101	0.119182	0.433646	0.240427	-0.511414	PRKAA1;PRKAA2;PDE3B;SMEK2;GCG;PHKB;PDHB;FOXO1;PPP3R1;CREB1;PLCB4;GNAQ;AKT3;PHKG2;GNAS;SIK1;CALM3;CALM1;PRKACB;PPARGC1A;CAMK2G;CREB5
HTLV-I infection_Homo sapiens_hsa05166	37/258	0.881681	1	4.17709	-0.526	CD40;WNT2B;PDGFB;XIAP;PIK3CB;ELK1;PIK3CG;CCNB2;NRAS;ZFP36;PPP3R1;MYC;AKT3;CHEK1;PRKACB;SMAD2;TGFB2;FZD3;VCAM1;MAP3K1;RANBP3;FZD5;NFATC2;RRAS2;HLA-A;WNT16;TGFBR2;KAT2B;CREB1;APC;HLA-DPB1;VDAC2;KRAS;SLC25A4;ATF3;ANAPC1;HLA-DQB1
Steroid biosynthesis_Homo sapiens_hsa00100	1/20	0.975208	1	23.156	-0.581328	LIPA
PPAR signaling pathway_Homo sapiens_hsa03320	8/69	0.914502	1	6.93061	-0.619427	FABP2;ACOX1;FABP7;OLR1;ACSL5;HMGCS2;CD36;CYP8B1
Measles_Homo sapiens_hsa05162	19/136	0.846835	1	4.09498	-0.680788	TNFAIP3;EIF2AK2;PIK3CB;HSPA2;IRAK4;RCHY1;GNB2L1;PIK3CG;CDK6;TBK1;IFNG;TRAF6;AKT3;EIF3H;FAS;CD46;MAP3K7;MYD88;IFNAR1
Alzheimer's disease_Homo sapiens_hsa05010	24/168	0.841947	1	3.99033	-0.686491	APP;MME;APAF1;NDUFB5;ATP5A1;ATP2A2;PSEN1;IDE;GRIN2B;ATP5G1;NDUFC2-KCTD14;COX6B1;PPP3R1;ADAM17;GRIN2A;PLCB4;GNAQ;NDUFAB1;CAPN2;MAPK1;FAS;NDUFS1;CALM3;CALM1
Arginine biosynthesis_Homo sapiens_hsa00220	1/20	0.975208	1	27.4918	-0.690177	GLS
RNA transport_Homo sapiens_hsa03013	25/172	0.821392	1	3.73558	-0.734992	NUP205;RBM8A;SUMO3;TPR;PABPC4L;EIF4EBP2;NUP43;RPP14;RAE1;EIF4E;NCBP2;EIF1AX;PABPC5;THOC2;MAGOHB;NUP93;EEF1A1;EIF2S3;NUP35;EIF3H;EIF3F;PABPC1;NUPL1;KPNB1;NUP37
B cell receptor signaling pathway_Homo sapiens_hsa04662	9/73	0.887596	1	6.32016	-0.75361	NRAS;PPP3R1;AKT3;NFATC2;MAPK1;KRAS;PIK3CB;SOS1;PIK3CG
Amphetamine addiction_Homo sapiens_hsa05031	16/67	0.0890281	0.399236	0.312551	-0.755999	GRIA2;MAOA;GRIN2B;PPP1CB;PPP1CC;PPP3R1;GRIN2A;CREB1;GRIN3A;CAMK4;GNAS;CALM3;CALM1;PRKACB;CAMK2G;CREB5
Amino sugar and nucleotide sugar metabolism_Homo sapiens_hsa00520	5/48	0.92541	1	10.3544	-0.802661	GMPPB;NANP;CYB5R4;UGP2;NPL
Neuroactive ligand-receptor interaction_Homo sapiens_hsa04080	52/277	0.218347	0.614369	0.546634	-0.831796	GABRB3;GABRB2;CHRM3;GABRB1;THRB;HTR2C;NR3C1;GRM1;GABRR2;EDNRA;CYSLTR1;CYSLTR2;BDKRB2;GHSR;GRID2;GRID1;GLP2R;F2R;NPY1R;AVPR1A;F2;SSTR2;PRLR;APLNR;AGTR2;PTGER4;GRIA2;PTGFR;ADCYAP1R1;CALCRL;C5AR1;LPAR1;GPR83;PLG;FPR3;FPR2;GRIN2A;CNR1;P2RY1;S1PR1;KISS1R;S1PR2;GABRA2;GABRA1;P2RY14;GABRA4;GABRA3;GRIN2B;TSHR;P2RX7;GRIN3A;NMUR2
Phototransduction_Homo sapiens_hsa04744	2/27	0.955943	1	18.9756	-0.854977	CALM3;CALM1
Metabolic pathways_Homo sapiens_hsa01100	200/1239	0.771031	1	3.40198	-0.884606	DMGDH;PGAP1;XYLT1;GLS;NAMPT;SEPHS1;SEPHS2;PDHX;ST6GAL1;ALG6;ACSL5;INPP4A;INPP4B;MTAP;CYP2U1;MTHFD2;MTHFD2L;SUCLG2;UPRT;HPRT1;ALG10B;ALDH7A1;PI4K2A;CDS1;TPH1;MAOA;MTMR8;GNS;MTMR7;ADH6;HSD11B1;PTDSS1;INPP5A;PPCS;RDH10;INPP5E;ST3GAL6;ARSB;ATP6V1C1;ATP6V1C2;TGDS;ST8SIA1;PAICS;EXT2;ALDH6A1;CYP2C8;PAH;MOGAT3;PIGN;GBE1;PIGP;LPCAT1;ADO;PIGX;NANP;ATIC;AUH;SPTLC3;RFK;NMRK1;IDS;AASS;PCYT1B;PCYT1A;BHMT2;NME1…
Influenza A_Homo sapiens_hsa05164	26/175	0.790516	1	3.77797	-0.888084	PLG;PIK3CB;PIK3CG;MAPK9;TBK1;AKT3;MAPK1;RAE1;MAP2K6;IVNS1ABP;IL33;EIF2AK2;HSPA2;IRAK4;MAPK14;MAPK13;MAPK10;DNAJC3;CXCL10;IFNG;HLA-DPB1;FAS;TLR3;MYD88;IFNAR1;HLA-DQB1
Collecting duct acid secretion_Homo sapiens_hsa04966	2/27	0.955943	1	20.0771	-0.904606	ATP6V1C1;ATP6V1C2
Retinol metabolism_Homo sapiens_hsa00830	8/65	0.878132	1	7.11447	-0.924587	UGT2B10;CYP26B1;CYP2C8;AWAT2;RDH10;ALDH1A2;UGT2B4;ADH6
Viral carcinogenesis_Homo sapiens_hsa05203	31/205	0.775492	1	3.6395	-0.925367	GTF2A1;GTF2A2;HDAC2;HPN;UBE3A;PIK3CB;HDAC8;PIK3CG;NRAS;CHEK1;MAPK1;PRKACB;CCR4;YWHAG;ACTN1;EIF2AK2;TRAF1;HLA-A;YWHAZ;HIST2H2BE;KAT2B;CREB1;RBL1;CDK6;HNRNPK;REL;HIST1H2BF;KRAS;HIST1H2BH;HIST1H2BG;CREB5
Hematopoietic cell lineage_Homo sapiens_hsa04640	12/88	0.829606	1	4.99574	-0.933227	GYPA;ITGAM;MME;TFRC;ITGB3;IL5RA;CD9;ITGA6;CD36;IL7R;CD44;CD33
Nucleotide excision repair_Homo sapiens_hsa03420	5/47	0.916778	1	10.7865	-0.937237	CUL4A;RFC1;RPA1;ERCC6;GTF2H5
Cell adhesion molecules (CAMs)_Homo sapiens_hsa04514	28/142	0.210046	0.607358	0.609301	-0.95077	ITGB1;CD40;NLGN1;SELPLG;ITGAM;NLGN2;SDC2;NRXN1;LRRC4;VTCN1;PVR;CLDN1;ITGB8;ITGAV;MADCAM1;NRCAM;CD58;LRRC4C;VCAM1;NEGR1;CADM1;HLA-A;VCAN;CNTN1;HLA-DPB1;ITGA6;CD226;HLA-DQB1
Fanconi anemia pathway_Homo sapiens_hsa03460	6/53	0.902609	1	9.42367	-0.9656	WDR48;FANCM;RPA1;BRCA1;POLK;FANCF
Inflammatory bowel disease (IBD)_Homo sapiens_hsa05321	8/65	0.878132	1	7.43918	-0.966786	SMAD2;TGFB2;MAF;IFNG;IL23A;HLA-DPB1;RORA;HLA-DQB1
Viral myocarditis_Homo sapiens_hsa05416	7/59	0.889775	1	8.33417	-0.973323	CD40;SGCD;CXADR;SGCB;HLA-DPB1;HLA-A;HLA-DQB1
Morphine addiction_Homo sapiens_hsa05032	20/91	0.123899	0.433646	0.487161	-1.01733	GABRA2;GABRB3;GABRB2;GABRA1;GABRB1;PDE1C;GABRA4;PDE3B;GABRA3;GNAI3;GNAI1;GABRR2;GNG2;PDE10A;ADRBK2;GRK4;GNAS;GNB4;PRKACB;KCNJ3
Tryptophan metabolism_Homo sapiens_hsa00380	4/40	0.923807	1	12.9491	-1.02625	TPH1;MAOA;CYP1B1;ALDH7A1
Base excision repair_Homo sapiens_hsa03410	3/33	0.933939	1	15.0301	-1.02722	TDG;LIG3;HMGB1
Other glycan degradation_Homo sapiens_hsa00511	1/18	0.964111	1	28.4317	-1.03916	MAN2B2
Huntington's disease_Homo sapiens_hsa05016	30/193	0.718009	0.98996	3.15743	-1.04597	HDAC2;DCTN2;NDUFB5;DCTN4;ATP5A1;ATP5G1;NDUFC2-KCTD14;POLR2D;POLR2F;PPARGC1A;APAF1;BDNF;AP2B1;SOD2;GRIN2B;COX6B1;CREB1;PLCB4;SP1;GNAQ;NDUFAB1;TFAM;VDAC2;TAF4B;NDUFS1;HAP1;SLC25A4;RCOR1;DNAL1;CREB5
Insulin resistance_Homo sapiens_hsa04931	22/109	0.2094	0.607358	0.683207	-1.0682	PRKAA1;PRKAA2;INSR;PIK3CB;FOXO1;PIK3CG;PPP1CB;MAPK10;PPP1CC;RPS6KA3;MAPK9;RPS6KA6;CREB1;PPP1R3C;PPP1R3B;PPP1R3E;AKT3;PPP1R3D;MLX;CD36;PPARGC1A;CREB5
Protein digestion and absorption_Homo sapiens_hsa04974	20/90	0.113857	0.426728	0.492819	-1.07081	KCNK5;CPB1;MME;COL24A1;COL14A1;COL11A1;SLC1A1;ATP1B4;ATP1A2;PRCP;SLC16A10;SLC8A1;COL4A1;MEP1A;COL5A2;COL4A3;COL9A1;COL10A1;COL6A3;SLC38A2
PI3K-Akt signaling pathway_Homo sapiens_hsa04151	62/341	0.277671	0.69297	0.888604	-1.13859	ITGB1;ITGB3;PIK3CB;BRCA1;FGF2;PIK3CG;FGF9;PPP2R5E;MYC;AKT3;TNR;ITGB8;ITGAV;YWHAG;F2R;TSC1;YWHAZ;PRLR;CREB1;COL4A1;COL4A3;COL6A3;SGK3;ITGA6;SOS1;SGK2;MET;IFNAR1;CREB5;PHLPP2;PRKAA1;PHLPP1;PRKAA2;LPAR1;PDGFB;FOXO3;THBS2;EGFR;THBS4;HSP90B1;NRAS;BCL2L11;GNG2;PDGFC;MAPK1;EIF4E;ANGPT1;INSR;OSM;NR4A1;CDK6;PPP2R2B;C8ORF44-SGK3;COL9A1;BCL2;GNB4;KRAS;TEK;FGF13;IL7R;FGF12;FGF10
Vibrio cholerae infection_Homo sapiens_hsa05110	6/51	0.881451	1	9.0786	-1.14559	TJP1;GNAS;PRKACB;ATP6V1C1;ATP6V1C2;ERO1L
Synaptic vesicle cycle_Homo sapiens_hsa04721	8/63	0.855614	1	7.38054	-1.15089	DNM3;UNC13B;NSF;UNC13C;AP2B1;STX2;ATP6V1C1;ATP6V1C2
Fructose and mannose metabolism_Homo sapiens_hsa00051	3/32	0.924622	1	14.8082	-1.16052	GMPPB;ENOSF1;SORD
Rheumatoid arthritis_Homo sapiens_hsa05323	13/90	0.771384	1	4.49648	-1.16714	CXCL6;TGFB2;ANGPT1;CCL20;CXCL5;IFNG;IL23A;HLA-DPB1;TEK;LTB;ATP6V1C1;ATP6V1C2;HLA-DQB1
Apoptosis_Homo sapiens_hsa04210	27/140	0.252455	0.652744	0.866104	-1.19221	TUBAL3;XIAP;PIK3CB;CTSS;PIK3CG;LMNB1;MAPK9;CTSO;NRAS;BCL2L11;AIFM1;CASP10;AKT3;CAPN2;MAPK1;RIPK1;MAP3K5;APAF1;TRAF1;PTPN13;MAPK10;BCL2;BIRC5;FAS;KRAS;BIRC2;BIRC3
Inflammatory mediator regulation of TRP channels_Homo sapiens_hsa04750	20/98	0.208034	0.607358	0.765214	-1.20143	PTGER4;PLA2G4D;HTR2C;PIK3CB;MAPK14;PIK3CG;MAPK13;PPP1CB;MAPK10;PPP1CC;MAPK9;PLCB4;GNAQ;GNAS;BDKRB2;CALM3;CALM1;PRKACB;CAMK2G;MAP2K6
Cytokine-cytokine receptor interaction_Homo sapiens_hsa04060	43/265	0.636292	0.958032	2.67586	-1.20975	CX3CR1;CXCL6;CCL13;CD40;CNTF;CCL4L1;IL24;PDGFB;CXCR4;IL5RA;CXCL13;CXCL5;EGFR;PDGFC;TNFRSF14;CCR7;CCR4;IL13RA1;ACVR1;TGFB2;TSLP;CCL20;OSM;PPBP;INHBA;GDF5;PRLR;ACVR2A;IFNW1;TGFBR2;CXCL10;IFNG;IL23A;TNFSF4;IFNE;FAS;ACKR3;TNFSF8;LTB;IL7R;MET;IFNAR1;BMPR1A
Hepatitis B_Homo sapiens_hsa05161	28/146	0.257586	0.660064	0.892909	-1.21114	PIK3CB;ELK1;PIK3CG;MAPK9;NRAS;TBK1;CASP10;MYC;AKT3;MAPK1;TGFB2;MAP3K1;TICAM2;APAF1;NFATC2;YWHAZ;TIRAP;MAPK10;CREB1;CDK6;BCL2;BIRC5;FAS;KRAS;TLR3;MYD88;IFNAR1;CREB5
Alcoholism_Homo sapiens_hsa05034	33/179	0.316113	0.748903	1.05511	-1.21512	SHC4;HDAC2;SHC3;MAOA;GNAI3;HDAC8;GNAI1;CAMKK2;PPP1CB;PPP1CC;NRAS;GRIN2A;GNG2;MAPK1;H3F3B;BDNF;H2AFV;GRIN2B;HIST2H2BE;CREB1;GRIN3A;PKIA;CAMK4;GNAS;GNB4;HIST1H2BF;KRAS;CALM3;HIST1H2BH;HIST1H2BG;CALM1;SOS1;CREB5
Asthma_Homo sapiens_hsa05310	3/31	0.914113	1	13.6661	-1.22723	CD40;HLA-DPB1;HLA-DQB1
ErbB signaling pathway_Homo sapiens_hsa04012	19/87	0.137253	0.458041	0.624474	-1.24016	SHC4;SHC3;GAB1;PIK3CB;CBL;ELK1;EGFR;PIK3CG;MAPK10;MAPK9;NRAS;ERBB3;MYC;AKT3;PAK7;MAPK1;KRAS;SOS1;CAMK2G
Jak-STAT signaling pathway_Homo sapiens_hsa04630	25/158	0.670322	0.962428	3.10282	-1.24112	CNTF;IL24;IL5RA;PIK3CB;PIK3CG;MYC;AKT3;SOCS7;SOCS4;IL13RA1;TSLP;OSM;STAM;PRLR;PIAS2;IFNW1;PIAS1;IFNG;IL23A;IFNE;BCL2;IL7R;SOS1;PTPN2;IFNAR1
Tight junction_Homo sapiens_hsa04530	27/139	0.240028	0.632	0.874347	-1.24769	RAB3B;GNAI3;PARD6G;CLDN1;MLLT4;YBX3;GNAI1;NRAS;AKT3;CTNNA3;MPDZ;MYH10;MAGI1;PRKCI;YES1;MAGI3;ACTN1;RRAS2;ASH1L;INADL;SHROOM4;TJP1;PPP2R2B;EXOC3;KRAS;AMOTL1;LLGL1
Fc gamma R-mediated phagocytosis_Homo sapiens_hsa04666	14/93	0.721632	0.98996	3.95787	-1.29121	PLA2G4D;MYO10;LIMK2;PIK3CB;ASAP2;PLD1;PIK3CG;ARPC2;PPAP2B;CFL2;AKT3;MAPK1;WASF2;WASF3
Ovarian steroidogenesis_Homo sapiens_hsa04913	6/50	0.86949	1	9.3105	-1.30205	PLA2G4D;INSR;GNAS;CYP1B1;PTGS2;PRKACB
T cell receptor signaling pathway_Homo sapiens_hsa04660	16/104	0.696964	0.98996	3.67981	-1.32849	NFATC2;PIK3CB;CBL;MAPK14;PIK3CG;MAPK13;MAPK9;NRAS;PPP3R1;IFNG;AKT3;PAK7;MAPK1;KRAS;SOS1;MAP3K7
Protein processing in endoplasmic reticulum_Homo sapiens_hsa04141	31/169	0.334006	0.748903	1.21755	-1.33516	TRAM1;HSPA4L;UBE2D1;HSP90B1;ERO1L;MAPK9;LMAN1;BAG2;MAN1A2;CAPN2;UBQLN1;SSR1;SEC62;UGGT2;UGGT1;SEC23B;MAP3K5;SEC24A;HSPA5;SSR3;SYVN1;UBE2E2;EIF2AK2;UBE2G2;HSPA2;MARCH6;MAPK10;DNAJC3;UBQLNL;DNAJC10;BCL2
Starch and sucrose metabolism_Homo sapiens_hsa00500	7/56	0.855518	1	8.58379	-1.33948	UGT2B10;UGP2;GBE1;AGL;ENPP1;UGT2B4;PGM2L1
Phagosome_Homo sapiens_hsa04145	29/154	0.287483	0.705193	1.0781	-1.34396	ITGB1;ITGAM;TUBAL3;TFRC;ITGB3;THBS2;CTSS;THBS4;OLR1;ITGAV;CD36;ATP6V1C1;ATP6V1C2;MBL2;MSR1;TUBB;STX7;TAP2;CYBB;HLA-A;PIKFYVE;TUBB2B;HLA-DPB1;PIK3C3;TLR6;PLA2R1;RAB5A;NOX1;HLA-DQB1
RNA degradation_Homo sapiens_hsa03018	11/77	0.771751	1	5.21038	-1.34997	TTC37;CNOT6;CNOT7;BTG1;PAPD7;PAPD5;DHX36;PABPC5;PABPC4L;PABPC1;DCP2
Purine metabolism_Homo sapiens_hsa00230	29/176	0.587006	0.915601	2.55615	-1.36172	PRPS2;PDE1C;PDE3B;GMPS;AK4;NT5C2;ATIC;TWISTNB;POLR2D;ENPP1;POLR2F;GUCY1A3;ADSL;ENTPD1;ENTPD5;PAICS;NME1;POLR3A;PDE10A;RRM2B;POLR3D;POLR1B;POLR3E;POLR3F;POLR3G;PDE5A;HPRT1;POLR3K;GART
Small cell lung cancer_Homo sapiens_hsa05222	19/86	0.126239	0.436513	0.668754	-1.38404	ITGB1;APAF1;XIAP;TRAF1;PIK3CB;PTGS2;PIK3CG;PIAS2;CDK6;COL4A1;TRAF6;MYC;COL4A3;AKT3;BCL2;ITGAV;ITGA6;BIRC2;BIRC3
Fatty acid degradation_Homo sapiens_hsa00071	5/44	0.885399	1	11.3972	-1.38723	HADHB;ACOX1;ACSL5;ALDH7A1;ADH6
Primary immunodeficiency_Homo sapiens_hsa05340	4/37	0.891873	1	12.1776	-1.39351	CD40;TAP2;IL7R;AICDA
Herpes simplex infection_Homo sapiens_hsa05168	32/185	0.468656	0.862207	1.91759	-1.45332	SRSF1;IFIT1;PPP1CB;PPP1CC;MAPK9;TBK1;TNFRSF14;MAP3K7;TAP2;EIF2AK2;TRAF1;HLA-A;HCFC2;SRPK1;MAPK10;PER3;HNRNPK;UBE2R2;IFNG;TRAF6;HLA-DPB1;SRSF2;TAF4B;FAS;SRSF3;TAB1;SRSF5;TAF3;TLR3;MYD88;IFNAR1;HLA-DQB1
Adipocytokine signaling pathway_Homo sapiens_hsa04920	10/70	0.764769	1	5.42039	-1.45365	MAPK10;MAPK9;PRKAA1;PRKAA2;AKT3;IRS4;ACSL5;CD36;PPARGC1A;CAMKK2
RNA polymerase_Homo sapiens_hsa03020	10/32	0.0331979	0.262449	0.437592	-1.49012	POLR3A;POLR3D;POLR1B;POLR3E;TWISTNB;POLR2D;POLR3F;POLR3G;POLR2F;POLR3K
Wnt signaling pathway_Homo sapiens_hsa04310	26/142	0.356175	0.763576	1.44716	-1.49395	WNT2B;ROCK2;PRICKLE2;PSEN1;LRP6;MAPK9;PPP3R1;MYC;GPC4;BTRC;PRKACB;MAP3K7;CAMK2G;FZD3;FZD5;NFATC2;CACYBP;WNT16;VANGL1;MAPK10;PLCB4;SFRP2;DAAM1;APC;TBL1XR1;BAMBI
Chemokine signaling pathway_Homo sapiens_hsa04062	31/187	0.573291	0.904264	2.7148	-1.51041	CX3CR1;SHC4;CXCL6;CCL13;SHC3;ROCK2;CCL4L1;GNAI3;CXCR4;PIK3CB;CXCL13;FOXO3;GNAI1;CXCL5;PIK3CG;NRAS;GNG2;ADRBK2;GRK4;AKT3;MAPK1;CCR7;PRKACB;CCR4;CCL20;PPBP;CXCL10;PLCB4;GNB4;KRAS;SOS1
Melanogenesis_Homo sapiens_hsa04916	20/100	0.236119	0.632	1.0549	-1.52266	EDN1;FZD3;WNT2B;FZD5;TYRP1;GNAI3;WNT16;GNAI1;NRAS;CREB1;PLCB4;DCT;GNAQ;GNAS;MAPK1;KRAS;CALM3;CALM1;PRKACB;CAMK2G
Vitamin digestion and absorption_Homo sapiens_hsa04977	2/24	0.930475	1	21.1866	-1.5267	FOLH1;AWAT2
Tuberculosis_Homo sapiens_hsa05152	31/178	0.45367	0.840021	1.94728	-1.5391	ITGAM;CTSS;MAPK9;PPP3R1;CASP10;AKT3;MAPK1;CAMK2G;TGFB2;ARHGEF12;APAF1;NFYA;IRAK4;MAPK14;TIRAP;MAPK13;MAPK10;CREB1;IFNG;IL23A;TRAF6;BCL2;HLA-DPB1;CALM3;PIK3C3;TLR6;PLA2R1;CALM1;RAB5A;MYD88;HLA-DQB1
Pentose phosphate pathway_Homo sapiens_hsa00030	3/29	0.889005	1	13.1541	-1.54761	RPIA;PRPS2;RPE
Hepatitis C_Homo sapiens_hsa05160	22/133	0.576587	0.904264	2.83158	-1.55915	EIF2AK2;PIK3CB;MAPK14;IFIT1;CLDN1;EGFR;PIK3CG;PIAS1;MAPK13;MAPK10;MAPK9;NRAS;TBK1;PPP2R2B;TRAF6;AKT3;MAPK1;KRAS;RIPK1;SOS1;TLR3;IFNAR1
Cell cycle_Homo sapiens_hsa04110	21/124	0.529677	0.904264	2.48853	-1.58143	SMAD2;TGFB2;HDAC2;YWHAZ;CCNB3;CCNB2;WEE1;RBL1;CDK6;TFDP1;STAG2;ORC6;TFDP2;RAD21;MYC;CHEK1;ORC2;MCM4;MCM6;ANAPC1;YWHAG
HIF-1 signaling pathway_Homo sapiens_hsa04066	20/103	0.28101	0.695257	1.25051	-1.58735	EDN1;ANGPT1;TFRC;INSR;CYBB;PIK3CB;PDHB;HIF1A;EGFR;PIK3CG;IFNG;AKT3;BCL2;PGK1;MAPK1;TEK;EIF4E;CAMK2G;NOX1;PDK1
Biosynthesis of amino acids_Homo sapiens_hsa01230	11/74	0.724042	0.98996	4.92562	-1.59051	RPIA;PRPS2;IDH1;RPE;CTH;PAH;PGK1;ACO1;MTR;ALDH7A1;PSPH
Endometrial cancer_Homo sapiens_hsa05213	13/52	0.087879	0.399236	0.655302	-1.59356	PIK3CB;FOXO3;ELK1;EGFR;PIK3CG;NRAS;APC;MYC;AKT3;MAPK1;KRAS;CTNNA3;SOS1
Aminoacyl-tRNA biosynthesis_Homo sapiens_hsa00970	9/66	0.804726	1	7.39895	-1.60745	DARS;SEPSECS;TARSL2;GATC;DARS2;QRSL1;FARSB;WARS2;PSTK
Leukocyte transendothelial migration_Homo sapiens_hsa04670	20/118	0.529207	0.904264	2.52975	-1.60987	ITGB1;VCAM1;ITGAM;ROCK2;ACTN1;CTNND1;GNAI3;CXCR4;RHOH;CYBB;PIK3CB;MAPK14;CLDN1;MLLT4;GNAI1;PIK3CG;MAPK13;CTNNA3;NOX1;VCL
Intestinal immune network for IgA production_Homo sapiens_hsa04672	6/48	0.842547	1	9.45668	-1.62017	CD40;HLA-DPB1;CXCR4;MADCAM1;AICDA;HLA-DQB1
Osteoclast differentiation_Homo sapiens_hsa04380	24/132	0.378146	0.786435	1.68169	-1.6354	TGFB2;ITGB3;NFATC2;CYBB;PIK3CB;MAPK14;PIK3CG;TGFBR2;MAPK13;MAPK10;MAPK9;PPP3R1;CREB1;IFNG;TRAF6;CAMK4;AKT3;MAPK1;TAB1;JUNB;MAP3K7;NOX1;IFNAR1;MAP2K6
Salivary secretion_Homo sapiens_hsa04970	14/89	0.65666	0.962428	3.92061	-1.64896	GUCY1A3;CHRM3;ATP2B4;ATP1B4;ATP2B2;ATP1A2;ATP2B1;PLCB4;GNAQ;GNAS;CALM3;CALM1;PRKACB;PRKG1
Chronic myeloid leukemia_Homo sapiens_hsa05220	16/73	0.158865	0.512296	0.911384	-1.67667	SHC4;TGFB2;HDAC2;SHC3;PIK3CB;CBL;PIK3CG;TGFBR2;RUNX1;NRAS;CDK6;MYC;AKT3;MAPK1;KRAS;SOS1
Oocyte meiosis_Homo sapiens_hsa04114	22/123	0.418189	0.82171	1.93133	-1.68378	YWHAZ;PPP1CB;PPP1CC;CCNB2;AR;RPS6KA3;RPS6KA6;PPP3R1;SGOL1;PPP2R5E;MAPK1;CALM3;PGR;CALM1;CPEB3;BTRC;PRKACB;CPEB2;CAMK2G;ANAPC1;YWHAG;CPEB4
AMPK signaling pathway_Homo sapiens_hsa04152	22/124	0.43427	0.825401	2.04657	-1.70702	RAB2A;PRKAA1;PRKAA2;INSR;IRS4;TSC1;PIK3CB;FOXO3;FOXO1;PIK3CG;CAMKK2;RAB10;TBC1D1;CREB1;PPP2R5E;PPP2R2B;AKT3;ULK1;CD36;MAP3K7;PPARGC1A;CREB5
Melanoma_Homo sapiens_hsa05218	16/71	0.13297	0.44897	0.865909	-1.74708	PDGFB;PIK3CB;FGF2;EGFR;PIK3CG;NRAS;CDK6;FGF9;AKT3;PDGFC;MAPK1;KRAS;FGF13;MET;FGF12;FGF10
Autoimmune thyroid disease_Homo sapiens_hsa05320	7/53	0.813076	1	8.46142	-1.75093	CD40;TPO;HLA-DPB1;FAS;HLA-A;TSHR;HLA-DQB1
Porphyrin and chlorophyll metabolism_Homo sapiens_hsa00860	5/42	0.859231	1	11.5737	-1.75594	UGT2B10;FECH;HEPH;COX15;UGT2B4
Amoebiasis_Homo sapiens_hsa05146	17/100	0.527767	0.904264	2.7671	-1.76846	SERPINB10;TGFB2;ITGAM;ACTN1;SERPINB9;PIK3CB;C8A;PIK3CG;PLCB4;IFNG;COL4A1;GNAQ;COL4A3;GNAS;PRKACB;RAB5A;VCL
ECM-receptor interaction_Homo sapiens_hsa04512	18/82	0.140056	0.462022	0.900333	-1.7698	ITGB1;ITGB3;THBS2;THBS4;SV2C;SV2B;SV2A;COL4A1;COL4A3;COL9A1;TNR;ITGB8;COL6A3;ITGAV;ITGA6;CD47;CD36;CD44
Chemical carcinogenesis_Homo sapiens_hsa05204	13/82	0.642702	0.958528	4.04991	-1.79036	UGT2B10;GSTK1;GSTO2;AKR1C2;PTGS2;CYP2C19;ADH6;HSD11B1;ALDH1A3;CYP2C8;NAT1;CYP1B1;UGT2B4
Pancreatic secretion_Homo sapiens_hsa04972	16/96	0.56377	0.904264	3.15206	-1.80647	CHRM3;PLA2G12A;PLA2G2D;CPB1;TRPC1;ATP2B4;ATP2A2;ATP1B4;ATP2B2;ATP1A2;RAB27B;ATP2B1;SLC4A4;PLCB4;GNAQ;GNAS
Pyrimidine metabolism_Homo sapiens_hsa00240	19/105	0.407977	0.82171	2.05918	-1.84615	ENTPD1;ENTPD5;NT5C2;NME1;POLR3A;RRM2B;POLR3D;POLR1B;DPYD;POLR3E;TWISTNB;POLR2D;POLR3F;CMPK1;CMPK2;POLR3G;POLR2F;UPRT;POLR3K
Graft-versus-host disease_Homo sapiens_hsa05332	5/41	0.844368	1	11.1509	-1.88636	IFNG;HLA-DPB1;FAS;HLA-A;HLA-DQB1
Glioma_Homo sapiens_hsa05214	15/65	0.122452	0.433646	0.904241	-1.89894	SHC4;SHC3;PDGFB;PIK3CB;EGFR;PIK3CG;NRAS;CDK6;AKT3;MAPK1;KRAS;CALM3;CALM1;SOS1;CAMK2G
Glycerophospholipid metabolism_Homo sapiens_hsa00564	18/95	0.333778	0.748903	1.73452	-1.90325	CDS1;DGKG;PLA2G12A;PLA2G2D;PCYT1B;DGKE;PCYT1A;PLA2G4D;DGKB;LPCAT1;GPCPD1;PLD1;AGPAT4;PLA2G16;PTDSS1;PPAP2B;LPIN1;DGKI
Prostate cancer_Homo sapiens_hsa05215	17/89	0.32754	0.748903	1.70702	-1.90529	PDGFB;KLK3;PIK3CB;FOXO1;EGFR;PIK3CG;HSP90B1;AR;NRAS;CREB1;AKT3;PDGFC;BCL2;MAPK1;KRAS;SOS1;CREB5
Leishmaniasis_Homo sapiens_hsa05140	16/73	0.158865	0.512296	1.04301	-1.91882	ITGB1;TGFB2;ITGAM;IRAK4;PTGS2;MAPK14;ELK1;MAPK13;IFNG;TRAF6;HLA-DPB1;MAPK1;TAB1;MAP3K7;MYD88;HLA-DQB1
Taste transduction_Homo sapiens_hsa04742	14/83	0.545929	0.904264	3.21521	-1.94606	GABRA2;HCN4;KCNK5;GABRA1;CHRM3;PDE1C;GABRA4;GABRA3;TAS2R13;GRM1;P2RY1;SCN2A;SCN3A;PRKACB
Glycosaminoglycan biosynthesis - keratan sulfate_Homo sapiens_hsa00533	1/15	0.937497	1	30.3331	-1.95776	CHST6
Drug metabolism - other enzymes_Homo sapiens_hsa00983	6/46	0.811255	1	9.77652	-2.04498	UGT2B10;NAT1;DPYD;GMPS;UGT2B4;HPRT1
Carbohydrate digestion and absorption_Homo sapiens_hsa04973	6/45	0.793871	1	9.03863	-2.08643	AKT3;ATP1B4;ATP1A2;SLC5A1;PIK3CB;PIK3CG
Glycosphingolipid biosynthesis - ganglio series_Homo sapiens_hsa00604	1/15	0.937497	1	32.6395	-2.10662	ST8SIA1
Salmonella infection_Homo sapiens_hsa05132	15/86	0.488221	0.881254	2.97948	-2.13625	ROCK2;CCL4L1;MAPK14;MAPK13;MAPK10;TJP1;MAPK9;ARPC2;IFNG;MAPK1;FLNB;WASF2;MYH10;MYD88;PFN2
Thyroid hormone synthesis_Homo sapiens_hsa04918	16/71	0.13297	0.44897	1.06676	-2.15232	HSPA5;GSR;ATP1B4;ATP1A2;TTF2;TSHR;HSP90B1;TPO;CREB1;PLCB4;IYD;GNAQ;GNAS;PRKACB;DUOX2;CREB5
Dilated cardiomyopathy_Homo sapiens_hsa05414	16/90	0.452177	0.840021	2.73304	-2.16916	ITGB1;TGFB2;TPM3;ITGB3;ATP2A2;SLC8A1;CACNB2;CACNG8;PLN;SGCD;SGCB;GNAS;ITGB8;ITGAV;ITGA6;PRKACB
Pathogenic Escherichia coli infection_Homo sapiens_hsa05130	8/55	0.73126	0.98996	7.01718	-2.19628	ITGB1;TUBB2B;ARPC2;TUBAL3;ROCK2;TUBB;YWHAZ;CLDN1
Peroxisome_Homo sapiens_hsa04146	16/83	0.320753	0.748903	1.95268	-2.22036	GSTK1;ABCD2;PEX19;IDH1;EPHX2;MPV17L;MPV17L2;ACSL5;PEX2;SOD2;PEX13;PEX26;PEX5L;AMACR;PEX3;ACOX1
Vasopressin-regulated water reabsorption_Homo sapiens_hsa04962	12/44	0.0563279	0.299373	0.773084	-2.22383	NSF;DYNC2LI1;DCTN5;CREB1;DCTN2;DCTN4;GNAS;AQP2;PRKACB;DYNLL2;RAB5A;CREB5
RIG-I-like receptor signaling pathway_Homo sapiens_hsa04622	15/70	0.192073	0.599183	1.34812	-2.22424	MAP3K1;MAPK14;IFNW1;MAPK13;MAPK10;CXCL10;MAPK9;SIKE1;TBK1;CASP10;TRAF6;IFNE;RIPK1;MAP3K7;ATG5
mTOR signaling pathway_Homo sapiens_hsa04150	14/60	0.123692	0.433646	1.07542	-2.24758	PRKAA1;PRKAA2;TSC1;PIK3CB;HIF1A;PIK3CG;RPS6KA3;RPS6KA6;AKT3;RRAGD;ULK2;MAPK1;ULK1;EIF4E
Long-term depression_Homo sapiens_hsa04730	14/60	0.123692	0.433646	1.08122	-2.25971	GUCY1A3;GRIA2;GRID2;PLA2G4D;GNAI3;GNAI1;GRM1;NRAS;PLCB4;GNAQ;GNAS;MAPK1;KRAS;PRKG1
Antigen processing and presentation_Homo sapiens_hsa04612	13/77	0.546178	0.904264	3.73708	-2.26022	HSPA5;NFYA;KLRC4;TAP2;HSPA2;HLA-A;CTSS;TAPBP;CREB1;IFNG;HLA-DPB1;B2M;HLA-DQB1
Basal cell carcinoma_Homo sapiens_hsa05217	8/55	0.73126	0.98996	7.23352	-2.264	BMP4;FZD3;WNT2B;FZD5;APC;HHIP;WNT16;GLI3
Bacterial invasion of epithelial cells_Homo sapiens_hsa05100	15/78	0.332225	0.748903	2.06315	-2.27347	SHC4;ITGB1;SHC3;CAV2;GAB1;PIK3CB;CBL;PIK3CG;CD2AP;DNM3;ARPC2;CTNNA3;WASF2;MET;VCL
Insulin secretion_Homo sapiens_hsa04911	16/85	0.357644	0.763576	2.22667	-2.2895	CHRM3;ADCYAP1R1;ATP1B4;ATP1A2;GCG;CREB1;PLCB4;PCLO;KCNMB1;GNAQ;KCNMB2;GNAS;KCNN3;PRKACB;CAMK2G;CREB5
Aldosterone synthesis and secretion_Homo sapiens_hsa04925	15/81	0.390221	0.799953	2.54455	-2.39453	CAMK1D;DAGLA;NR4A2;NR4A1;CREB1;PLCB4;CAMK4;GNAQ;GNAS;CALM3;PRKD1;CALM1;PRKACB;CAMK2G;CREB5
Complement and coagulation cascades_Homo sapiens_hsa04610	16/79	0.250525	0.652744	1.7302	-2.39495	ITGAM;C1S;FGG;C5AR1;F2R;PLAUR;PLG;TFPI;F2;F3;C8A;CLU;F5;BDKRB2;CD46;MBL2
Endocrine and other factor-regulated calcium reabsorption_Homo sapiens_hsa04961	12/47	0.0865481	0.399236	0.987023	-2.4153	DNM3;PLCB4;GNAQ;GNAS;BDKRB2;ATP1B4;ATP1A2;ATP2B1;AP2B1;PRKACB;ESR1;SLC8A1
Epithelial cell signaling in Helicobacter pylori infection_Homo sapiens_hsa05120	11/68	0.611017	0.932776	4.98318	-2.45487	MAPK10;TJP1;MAPK9;ADAM17;PTPRZ1;MAPK14;MET;EGFR;ATP6V1C1;ATP6V1C2;MAPK13
Notch signaling pathway_Homo sapiens_hsa04330	7/48	0.721908	0.98996	7.59881	-2.47613	NOTCH2;KAT2B;HDAC2;ADAM17;MAML2;PSEN1;DLL1
Central carbon metabolism in cancer_Homo sapiens_hsa05230	14/67	0.231027	0.629581	1.6981	-2.48809	IDH1;PIK3CB;PDHB;HIF1A;EGFR;PIK3CG;GLS;NRAS;MYC;AKT3;MAPK1;KRAS;MET;PDK1
Steroid hormone biosynthesis_Homo sapiens_hsa00140	9/58	0.66233	0.962428	6.16261	-2.53894	HSD11B1;UGT2B10;STS;SRD5A1;CYP1B1;UGT2B4;AKR1C2;HSD17B12;AKR1C4
Pancreatic cancer_Homo sapiens_hsa05212	14/66	0.213739	0.607358	1.64703	-2.54137	SMAD2;TGFB2;PIK3CB;PLD1;EGFR;PIK3CG;TGFBR2;MAPK10;MAPK9;CDK6;AKT3;MAPK1;KRAS;ARHGEF6
Hypertrophic cardiomyopathy (HCM)_Homo sapiens_hsa05410	15/83	0.429465	0.82171	3.02786	-2.55919	ITGB1;TGFB2;PRKAA1;PRKAA2;TPM3;ITGB3;ATP2A2;SLC8A1;CACNB2;CACNG8;SGCD;SGCB;ITGB8;ITGAV;ITGA6
Renal cell carcinoma_Homo sapiens_hsa05211	14/66	0.213739	0.607358	1.66116	-2.56317	ARNT2;TGFB2;GAB1;PDGFB;PIK3CB;HIF1A;PIK3CG;NRAS;AKT3;PAK7;MAPK1;KRAS;SOS1;MET
Shigellosis_Homo sapiens_hsa05131	14/65	0.197042	0.607358	1.58224	-2.57009	ITGB1;ROCK2;MAPK14;MAPK13;MAPK10;MAPK9;ARPC2;MAPK1;BTRC;WASF2;CD44;VCL;PFN2;ATG5
Fatty acid metabolism_Homo sapiens_hsa01212	7/48	0.721908	0.98996	7.94847	-2.59007	HADHB;ACOX1;ELOVL2;ACSL5;ELOVL6;HSD17B12;PTPLAD2
p53 signaling pathway_Homo sapiens_hsa04115	12/69	0.503751	0.892448	3.8055	-2.60933	CCNB3;CCNB2;CDK6;APAF1;RRM2B;EI24;CHEK1;FAS;MDM4;RCHY1;PPM1D;SERPINB5
Drug metabolism - cytochrome P450_Homo sapiens_hsa00982	12/69	0.503751	0.892448	3.89622	-2.67153	UGT2B10;ALDH1A3;GSTK1;CYP2C8;GSTO2;MAOA;UGT2B4;FMO2;FMO3;CYP2C19;FMO5;ADH6
Bile secretion_Homo sapiens_hsa04976	13/71	0.420869	0.82171	3.11701	-2.69757	ABCB1;SLC10A2;ATP1B4;ATP1A2;SLC5A1;ABCB11;SLC4A4;SLCO1B3;SLCO1A2;GNAS;UGT2B4;PRKACB;ABCG2
Fc epsilon RI signaling pathway_Homo sapiens_hsa04664	13/68	0.357581	0.763576	2.63616	-2.71101	PLA2G4D;PIK3CB;MAPK14;PIK3CG;MAPK13;MAPK10;MAPK9;NRAS;AKT3;MAPK1;KRAS;SOS1;MAP2K6
Propanoate metabolism_Homo sapiens_hsa00640	4/32	0.812528	1	13.2457	-2.74986	ALDH6A1;DBT;BCKDHB;SUCLG2
Ascorbate and aldarate metabolism_Homo sapiens_hsa00053	3/27	0.857511	1	18.2618	-2.80723	UGT2B10;UGT2B4;ALDH7A1
Bladder cancer_Homo sapiens_hsa05219	6/41	0.712047	0.98996	8.51958	-2.89335	NRAS;RPS6KA5;MYC;MAPK1;KRAS;EGFR
Arrhythmogenic right ventricular cardiomyopathy (ARVC)_Homo sapiens_hsa05412	14/74	0.364495	0.763576	2.87728	-2.90387	ITGB1;ITGB3;ACTN1;ATP2A2;SLC8A1;CACNB2;CACNG8;GJA1;SGCD;SGCB;ITGB8;ITGAV;ITGA6;CTNNA3
Glutathione metabolism_Homo sapiens_hsa00480	8/52	0.669438	0.962428	7.24217	-2.9064	GSTK1;GCLC;RRM2B;GSTO2;IDH1;GSR;TXNDC12;GCLM
VEGF signaling pathway_Homo sapiens_hsa04370	12/61	0.328204	0.748903	2.67665	-2.98211	NRAS;PPP3R1;PLA2G4D;AKT3;NFATC2;MAPK1;KRAS;PIK3CB;PTGS2;MAPK14;PIK3CG;MAPK13
Legionellosis_Homo sapiens_hsa05134	9/55	0.595917	0.924477	5.82783	-3.0168	EEF1A1;HBS1L;RAB1A;ITGAM;APAF1;BNIP3;HSPA2;MYD88;NAIP
Glycerolipid metabolism_Homo sapiens_hsa00561	10/59	0.547581	0.904264	5.06116	-3.04806	DGKG;DGKE;MOGAT3;DGKB;PPAP2B;LPIN1;ALDH7A1;DGKI;MGLL;AGPAT4
Malaria_Homo sapiens_hsa05144	12/49	0.111378	0.426728	1.39049	-3.05189	CD40;GYPA;TGFB2;VCAM1;IFNG;KLRB1;SDC2;CD36;THBS2;MET;MYD88;THBS4
Cocaine addiction_Homo sapiens_hsa05030	12/49	0.111378	0.426728	1.40304	-3.07942	GRIA2;GRIN2A;CREB1;GRIN3A;BDNF;MAOA;GNAS;GNAI3;PRKACB;GRIN2B;GNAI1;CREB5
Acute myeloid leukemia_Homo sapiens_hsa05221	10/57	0.500616	0.892448	4.5133	-3.12283	NRAS;MYC;AKT3;MAPK1;KRAS;PIK3CB;SOS1;PIK3CG;RUNX1T1;RUNX1
Mucin type O-Glycan biosynthesis_Homo sapiens_hsa00512	4/31	0.791897	1	13.4768	-3.14446	GALNT7;GALNT1;C1GALT1;GCNT1
Butanoate metabolism_Homo sapiens_hsa00650	9/28	0.0355745	0.262449	0.947682	-3.16159	BDH2;ALDH5A1;OXCT1;GAD1;GAD2;ACSM2A;HMGCS2;L2HGDH;ACSM2B
Cytosolic DNA-sensing pathway_Homo sapiens_hsa04623	12/64	0.393723	0.801409	3.42194	-3.18961	CXCL10;IL33;TBK1;POLR3A;CCL4L1;POLR3D;POLR3E;POLR3F;POLR3G;POLR2F;RIPK1;POLR3K
Prion diseases_Homo sapiens_hsa05020	5/35	0.726505	0.98996	10.2415	-3.27227	HSPA5;MAPK1;PRKACB;C8A;ELK1
Basal transcription factors_Homo sapiens_hsa03022	7/45	0.654443	0.962428	7.75103	-3.28621	GTF2A1;GTF2A2;TAF15;TAF4B;TAF3;GTF2F2;GTF2H5
Fatty acid biosynthesis_Homo sapiens_hsa00061	1/13	0.909529	1	35.0138	-3.32028	ACSL5
Non-small cell lung cancer_Homo sapiens_hsa05223	10/56	0.476636	0.870921	4.59229	-3.40289	NRAS;CDK6;AKT3;MAPK1;KRAS;PIK3CB;FOXO3;SOS1;EGFR;PIK3CG
Staphylococcus aureus infection_Homo sapiens_hsa05150	12/56	0.226049	0.629581	2.29919	-3.41889	SELPLG;ITGAM;C1S;FGG;C5AR1;HLA-DPB1;DSG1;PLG;FPR3;FPR2;MBL2;HLA-DQB1
Arachidonic acid metabolism_Homo sapiens_hsa00590	11/62	0.479462	0.870921	4.65708	-3.42338	PLA2G16;PLA2G12A;PLA2G2D;CYP2C8;PLA2G4D;CYP2U1;EPHX2;ALOX15;PTGS2;CYP2C19;PTGS1
Citrate cycle (TCA cycle)_Homo sapiens_hsa00020	4/30	0.769478	1	13.1858	-3.45525	IDH1;SUCLG2;ACO1;PDHB
Lysine degradation_Homo sapiens_hsa00310	9/52	0.523802	0.904264	5.34846	-3.45854	SETD2;TMLHE;KMT2A;SETD7;ASH1L;WHSC1;ALDH7A1;COLGALT1;AASS
DNA replication_Homo sapiens_hsa03030	5/36	0.749803	1	12.0306	-3.46414	RFC1;RPA1;MCM4;MCM6;DNA2
Pentose and glucuronate interconversions_Homo sapiens_hsa00040	5/36	0.749803	1	12.4897	-3.59634	UGT2B10;UGP2;RPE;SORD;UGT2B4
Glycine, serine and threonine metabolism_Homo sapiens_hsa00260	6/40	0.688454	0.983016	9.9984	-3.73247	DMGDH;MAOA;CTH;SARDH;ALDH7A1;PSPH
Type II diabetes mellitus_Homo sapiens_hsa04930	8/48	0.574915	0.904264	6.74942	-3.73602	MAPK10;MAPK9;INSR;IRS4;MAPK1;PIK3CB;PIK3CG;SOCS4
Homologous recombination_Homo sapiens_hsa03440	4/29	0.745206	1	13.1264	-3.8604	RPA1;MRE11A;NBN;RAD54B
Valine, leucine and isoleucine degradation_Homo sapiens_hsa00280	8/48	0.574915	0.904264	6.9932	-3.87096	HADHB;ALDH6A1;AUH;OXCT1;DBT;BCKDHB;HMGCS2;ALDH7A1
ABC transporters_Homo sapiens_hsa02010	11/44	0.110615	0.426728	1.82023	-4.0076	ABCD2;ABCA10;ABCB10;ABCB1;ABCA5;ABCA6;ABCB5;TAP2;ABCC9;ABCB11;ABCG2
Amyotrophic lateral sclerosis (ALS)_Homo sapiens_hsa05014	11/51	0.232528	0.629581	2.84244	-4.14639	GRIA2;PPP3R1;GRIN2A;APAF1;BCL2;MAPK14;GRIN2B;RAB5A;MAP3K5;MAP2K6;MAPK13
Hedgehog signaling pathway_Homo sapiens_hsa04340	11/50	0.212554	0.607358	2.69136	-4.16774	BMP4;CSNK1G3;WNT2B;ZIC2;HHIP;RAB23;WNT16;BTRC;PRKACB;GLI3;CSNK1G1
Allograft rejection_Homo sapiens_hsa05330	6/38	0.637575	0.958032	9.27477	-4.17442	CD40;IFNG;HLA-DPB1;FAS;HLA-A;HLA-DQB1
SNARE interactions in vesicular transport_Homo sapiens_hsa04130	5/34	0.701681	0.98996	11.8789	-4.2084	STX7;GOSR1;STX2;BET1;VTI1B
N-Glycan biosynthesis_Homo sapiens_hsa00510	9/49	0.447786	0.839965	5.28875	-4.24919	MGAT4C;ST6GAL1;ALG6;MAN1A2;MAN2A1;MGAT5;MGAT4A;ALG13;ALG10B
2-Oxocarboxylic acid metabolism_Homo sapiens_hsa01210	2/17	0.80771	1	20.1256	-4.29787	IDH1;ACO1
Mismatch repair_Homo sapiens_hsa03430	3/23	0.770601	1	17.2141	-4.48574	RFC1;MSH3;RPA1
Fat digestion and absorption_Homo sapiens_hsa04975	7/41	0.55083	0.904264	7.58279	-4.52184	FABP2;PLA2G12A;PLA2G2D;MOGAT3;PPAP2B;MTTP;CD36
African trypanosomiasis_Homo sapiens_hsa05143	6/35	0.552737	0.904264	8.24964	-4.89099	PLCB4;VCAM1;IFNG;GNAQ;FAS;MYD88
Ether lipid metabolism_Homo sapiens_hsa00565	9/45	0.344662	0.755577	4.61292	-4.91364	PLA2G16;PLA2G12A;PLA2G2D;PLA2G4D;PPAP2B;LPCAT1;PLD1;PAFAH1B2;PAFAH1B1
Nitrogen metabolism_Homo sapiens_hsa00910	2/17	0.80771	1	23.1261	-4.93862	CA8;CA13
Aldosterone-regulated sodium reabsorption_Homo sapiens_hsa04960	8/39	0.332347	0.748903	4.63491	-5.10571	INSR;ATP1B4;MAPK1;NEDD4L;ATP1A2;KRAS;PIK3CB;PIK3CG
Sphingolipid metabolism_Homo sapiens_hsa00600	10/47	0.261324	0.663716	3.81347	-5.11766	CERS3;CERS4;ASAH1;ASAH2;CERS6;SPTLC3;PPAP2B;ACER3;SGMS2;B4GALT6
Cysteine and methionine metabolism_Homo sapiens_hsa00270	9/45	0.344662	0.755577	4.85699	-5.17362	MTAP;GCLC;AHCY;CTH;BHMT2;MRI1;MTR;GCLM;CDO1
Alanine, aspartate and glutamate metabolism_Homo sapiens_hsa00250	6/35	0.552737	0.904264	9.04331	-5.36154	ADSL;FOLH1;ALDH5A1;GAD1;GAD2;GLS
Type I diabetes mellitus_Homo sapiens_hsa04940	9/43	0.294331	0.715874	4.3879	-5.36662	PTPRN2;IFNG;GAD1;HLA-DPB1;GAD2;CPE;FAS;HLA-A;HLA-DQB1
Tyrosine metabolism_Homo sapiens_hsa00350	6/35	0.552737	0.904264	9.4158	-5.58237	ALDH1A3;TPO;DCT;MAOA;TYRP1;ADH6
Glycosylphosphatidylinositol(GPI)-anchor biosynthesis_Homo sapiens_hsa00563	4/25	0.628843	0.954909	12.3039	-5.70745	PGAP1;PIGN;PIGP;PIGX
Circadian rhythm_Homo sapiens_hsa04710	9/30	0.0538973	0.297472	2.03985	-5.95775	PRKAA1;CREB1;PRKAA2;PER3;BHLHE41;CRY1;RORA;RORB;BTRC
Maturity onset diabetes of the young_Homo sapiens_hsa04950	4/26	0.66084	0.962428	14.3957	-5.96334	NR5A2;ONECUT1;PAX6;IAPP
Thyroid cancer_Homo sapiens_hsa05216	7/29	0.206418	0.607358	3.92208	-6.18845	NRAS;TPM3;MYC;TPR;CCDC6;MAPK1;KRAS
Other types of O-glycan biosynthesis_Homo sapiens_hsa00514	6/31	0.427687	0.82171	7.40101	-6.28614	B3GALTL;ST6GAL1;FUT9;GXYLT1;GXYLT2;COLGALT1
Regulation of autophagy_Homo sapiens_hsa04140	8/39	0.332347	0.748903	5.73658	-6.31928	ATG3;PRKAA1;PRKAA2;IFNG;ULK2;ULK1;PIK3C3;ATG5
Linoleic acid metabolism_Homo sapiens_hsa00591	7/29	0.206418	0.607358	4.42956	-6.98918	PLA2G16;PLA2G12A;PLA2G2D;CYP2C8;PLA2G4D;ALOX15;CYP2C19
Proximal tubule bicarbonate reclamation_Homo sapiens_hsa04964	4/23	0.559318	0.904264	12.0885	-7.02384	ATP1B4;ATP1A2;SLC4A4;GLS
Protein export_Homo sapiens_hsa03060	4/23	0.559318	0.904264	12.1486	-7.05876	SRP19;SPCS2;HSPA5;SEC62
beta-Alanine metabolism_Homo sapiens_hsa00410	6/31	0.427687	0.82171	8.50872	-7.22698	ALDH1A3;ALDH6A1;GAD1;DPYD;GAD2;ALDH7A1
Fatty acid elongation_Homo sapiens_hsa00062	5/25	0.417142	0.82171	8.558	-7.48249	HADHB;ELOVL2;ELOVL6;HSD17B12;PTPLAD2
Nicotinate and nicotinamide metabolism_Homo sapiens_hsa00760	6/29	0.362772	0.763576	7.87739	-7.98752	NADK2;NNMT;NMRK1;NAMPT;ENPP1;NT5C2
alpha-Linolenic acid metabolism_Homo sapiens_hsa00592	5/25	0.417142	0.82171	9.1949	-8.03936	PLA2G16;PLA2G12A;PLA2G2D;PLA2G4D;ACOX1
Glycosaminoglycan biosynthesis - heparan sulfate / heparin_Homo sapiens_hsa00534	7/24	0.0958777	0.4107	3.52231	-8.25869	EXT2;EXTL2;HS3ST3A1;XYLT1;B3GALT6;HS6ST2;HS2ST1
Glycosphingolipid biosynthesis - lacto and neolacto series_Homo sapiens_hsa00601	6/26	0.267135	0.672524	6.68816	-8.82839	FUT6;FUT9;ST8SIA1;GCNT2;ST3GAL6;B3GALT5
Glycosaminoglycan biosynthesis - chondroitin sulfate / dermatan sulfate_Homo sapiens_hsa00532	4/20	0.443334	0.837084	10.8807	-8.85075	DSE;XYLT1;B3GALT6;CHSY3
Glycosaminoglycan degradation_Homo sapiens_hsa00531	3/19	0.644585	0.958528	20.9843	-9.21523	IDS;GNS;ARSB
Biosynthesis of unsaturated fatty acids_Homo sapiens_hsa01040	5/23	0.34488	0.755577	8.85046	-9.42184	ACOX1;ELOVL2;ELOVL6;HSD17B12;PTPLAD2
Phenylalanine metabolism_Homo sapiens_hsa00360	3/17	0.565486	0.904264	16.9757	-9.67735	ALDH1A3;MAOA;PAH
Terpenoid backbone biosynthesis_Homo sapiens_hsa00900	4/22	0.522024	0.904264	14.9232	-9.70067	NUS1;IDI1;HMGCS2;PCYOX1
Non-homologous end-joining_Homo sapiens_hsa03450	2/13	0.670682	0.962428	24.3809	-9.7392	LIG4;MRE11A
Histidine metabolism_Homo sapiens_hsa00340	5/24	0.381054	0.786781	10.5105	-10.1407	ALDH1A3;MAOA;HNMT;ALDH7A1;C9ORF41
Pantothenate and CoA biosynthesis_Homo sapiens_hsa00770	4/18	0.361117	0.763576	11.5843	-11.7993	PPCS;DPYD;ENPP1;AASDHPPT
Renin-angiotensin system_Homo sapiens_hsa04614	6/23	0.179532	0.566217	6.93162	-11.9044	NLN;MME;PREP;PRCP;LNPEP;AGTR2
Primary bile acid biosynthesis_Homo sapiens_hsa00120	4/17	0.319645	0.748903	10.7242	-12.2314	CYP39A1;AMACR;AKR1C4;CYP8B1
Selenocompound metabolism_Homo sapiens_hsa00450	6/17	0.0529713	0.297472	4.26871	-12.5415	SEPSECS;CTH;MTR;SEPHS1;SEPHS2;PSTK
One carbon pool by folate_Homo sapiens_hsa00670	5/20	0.239114	0.632	9.13721	-13.0737	ATIC;MTHFD2;MTHFD2L;MTR;GART
Glycosphingolipid biosynthesis - globo series_Homo sapiens_hsa00603	3/14	0.428834	0.82171	17.0042	-14.3972	FUT9;ST8SIA1;B3GALT5
Sulfur relay system_Homo sapiens_hsa04122	2/10	0.522595	0.904264	24.5691	-15.9441	NFS1;URM1
Phenylalanine, tyrosine and tryptophan biosynthesis_Homo sapiens_hsa00400	1/5	0.603042	0.925524	38.7756	-19.6115	PAH
Caffeine metabolism_Homo sapiens_hsa00232	1/5	0.603042	0.925524	39.9324	-20.1966	NAT1
Taurine and hypotaurine metabolism_Homo sapiens_hsa00430	4/11	0.0990133	0.417894	9.27142	-21.4402	GAD1;GAD2;ADO;CDO1
Synthesis and degradation of ketone bodies_Homo sapiens_hsa00072	3/10	0.230434	0.629581	15.5746	-22.8603	BDH2;OXCT1;HMGCS2
