# Supplementary material for: Effects of Cardiac Sympathetic Neurodegeneration and PPARγ Activation on Rhesus Macaque Whole Blood miRNA and mRNA Expression Profiles
Source: Biomed Res Int. 2020 May 2;2020:9426204. doi: 10.1155/2020/9426204 (PMC7212295; doi:10.1155/2020/9426204)
Supplement: Supplementary 4 — Supplementary Table 3: sequences of primers used for RT-qPCR. [file 9426204.f12.xlsx]

## Sheet: A. Biological Process
Term	P-value	Adjusted P-value	Gene Count	Genes
regulation of transcription, DNA-templated (GO:0006355)	4.29459e-11	1.98324e-07	367	JMJD1C	IKZF1	ELK1	BACH1	RRP8	ELK3	SPIC	RPS6KA3	ZNF609	RPS6KA5	SOX1	MYC	ZNF605	GPBP1	SOX6	BTRC	JUNB	RNF111	TRIM22	TP63	ACVR1	DDX17	SMARCC1	ZNF284	ZNF283	SFMBT1	ZNF281	ZNF160	SOX11	HCFC2	MED4	MED6	RUNX2	DKK3	THAP1	RUNX1	EID1	EID2	SFRP2	RFX7	PRKAR1A	TFAM	ZNF831	ATF3	ZNF398	ZNF275
regulation of gene expression (GO:0010468)	4.64063e-09	1.07152e-05	246	APP	CNTF	PID1	JMJD1C	BACH1	RPS6KA5	SOX1	MYC	ZNF605	GPBP1	SOX6	TRIM22	SRRM4	MBNL2	ZNF284	MUSK	ZNF283	ZNF281	ZNF160	RC3H1	SOX11	ANK3	THAP1	SFRP2	TFAM	ALPK3	ZNF831	ZNF398	ZNF275	ZNF154	HPN	SUPT4H1	PDGFB	TWIST1	BAZ2B	PRDM10	HIF1A	HLTF	HIVEP1	HIVEP3	HIVEP2	ZNF148	PPARGC1A	RREB1	ZNF146	MSR1
regulation of cellular macromolecule biosynthetic process (GO:2000112)	9.81626e-09	1.51105e-05	162	APP	NAB1	JMJD1C	NUCKS1	PRDM2	RORA	AHR	RORB	NR3C1	BACH1	RPS6KA5	SOX1	HMGN5	EFEMP1	ZFP30	ZNF84	ZNF605	GPBP1	ZNF207	SOX6	ZFP37	TRIM22	ZNF322	ZNF284	ESCO1	ZNF283	ZNF160	ATP1B4	TSC1	ESCO2	THAP1	KAT6B	ZNF317	TFAM	ZNF436	ZNF831	ZNF398	NOTCH2	ANKRD17	ZNF551	ZNF793	ZNF792	ZNF275	ZNF154	ZNF790	SUPT4H1
nervous system development (GO:0007399)	5.38846e-08	6.22098e-05	122	SEMA5A	CHRM3	ANKLE2	GMFB	FGF2	RPS6KA3	RPS6KA6	OPHN1	NRCAM	EPHB1	SH3GL2	PCDHAC2	PCDHAC1	SRRM4	SERF1A	RBFOX1	SEMA6A	LIG4	PCDHA13	PCDHA12	PCDHA11	POU3F3	PCDHA10	NAIP	NOTCH2	PCDH10	PCDH19	PCDH18	SNTG2	PCDHA1	FLRT3	KIF3A	NHLH1	PDGFC	PCDHA5	PCDHA4	PCDHA3	NDP	NPTX1	PCDHA2	PCDHA9	PCDHA8	GPM6B	PCDHA7	PCDHA6	FZD5
regulation of nucleic acid-templated transcription (GO:1903506)	8.99002e-08	8.30318e-05	153	NAB1	JMJD1C	PRDM2	RORA	AHR	RORB	NR3C1	BACH1	RPS6KA5	SOX1	HMGN5	EFEMP1	ZFP30	ZNF84	ZNF605	GPBP1	ZNF207	SOX6	ZFP37	TRIM22	ZNF322	ZNF284	ZNF283	ZNF160	ATP1B4	THAP1	KAT6B	ZNF317	TFAM	ZNF436	ZNF831	ZNF398	NOTCH2	ZNF551	ZNF793	ZNF792	ZNF275	ZNF154	ZNF790	SUPT4H1	BAZ2B	HIF1A	PHF21A	SBNO1	ZNF429	HLTF
regulation of transcription from RNA polymerase II promoter (GO:0006357)	1.14058e-07	8.77866e-05	324	ZNF177	APP	PID1	MAML2	CCNC	IKZF1	IKZF2	ELK1	BACH1	ELK3	SPIC	RPS6KA3	ZNF609	RPS6KA5	TBK1	ZNF608	MYC	NAMPT	TRIM27	JUNB	IER5	HOXA5	RNF111	TP63	ACVR1	MEF2A	DDX17	SMARCC1	ZNF281	SOX11	EBF4	DICER1	HCFC2	MED4	MED6	RUNX2	THAP1	RUNX1	EID1	SFRP2	RFX7	PRKAR1A	TFAM	HOXB2	PRKD1	ZNF831
positive regulation of transcription, DNA-templated (GO:0045893)	3.65562e-06	0.00241166	246	APP	PID1	MAML2	CCNC	IKZF1	IKZF2	ELK1	ELK3	RPS6KA3	ZNF609	RPS6KA5	TBK1	MYC	CHEK1	NAMPT	BTRC	JUNB	IER5	HOXA5	RNF111	TP63	ACVR1	MEF2A	DDX17	SMARCC1	ZNF281	WDR75	SOX11	EBF4	MED4	MED6	RUNX2	RUNX1	SFRP2	TFAM	HOXB2	PRKD1	ASF1A	ATF3	ZNF398	BEX1	SUPT4H1	PDGFB	TWIST1	RTF1	HIF1A
positive regulation of transcription from RNA polymerase II promoter (GO:0045944)	4.31369e-06	0.00249008	193	APP	PID1	MAML2	CCNC	IKZF1	IKZF2	ELK1	ELK3	RPS6KA3	ZNF609	RPS6KA5	TBK1	MYC	NAMPT	JUNB	IER5	HOXA5	RNF111	TP63	ACVR1	MEF2A	DDX17	SOX11	EBF4	MED6	RUNX2	RUNX1	SFRP2	TFAM	HOXB2	PRKD1	ATF3	PAXIP1	BEX1	SUPT4H1	PDGFB	TWIST1	RTF1	HIF1A	PPP3R1	NHLH1	DHX36	ALX1	PPARGC1A	RREB1	FZD5
transcription from RNA polymerase II promoter (GO:0006366)	5.79275e-06	0.00297232	120	CCNT2	MAML2	CCNT1	CCNC	RORA	TTF2	AHR	RORB	NR3C1	CTGF	LSM11	TRIM24	SNRPD3	PKNOX1	SOX5	SSU72	THOC2	MED4	GTF2F2	MED6	RUNX2	MAF	ZC3H11A	SARNP	SRSF2	SRSF3	SNRPE	PGR	ZNF831	SRSF5	NOTCH2	RBM8A	KMT2A	C5AR1	CSTF2	SUPT4H1	ZBTB1	RTF1	RPAP2	HIF1A	HIVEP1	HIVEP3	ALX1	HIVEP2	ZNF148	PPARGC1A
negative regulation of transcription, DNA-templated (GO:0045892)	6.91016e-06	0.00319111	185	ZNF177	NAB1	PRDM5	UBP1	UBE2D1	IKZF1	AHR	RORB	NR3C1	IKZF2	BACH1	ELK3	LOXL2	YY1	ZFP36	RPS6KA5	ZNF608	MYC	TRIM27	BTRC	JUNB	TP63	ZNF564	MEF2A	EOMES	SFMBT1	ZNF281	ARID5B	SOX11	ZBTB33	DICER1	HCFC2	POU3F3	RUNX2	FOXP1	DKK3	THAP1	EID1	EID2	ZNF91	SFRP2	TBL1XR1	KAT6B	KAT6A	ZNF831	ZNF675
protein phosphorylation (GO:0006468)	6.5365e-05	0.0274414	112	APP	GMFB	CCNT1	MYLK4	RPS6KA3	STK10	RPS6KA6	RPS6KA5	TBK1	EFEMP1	AKT3	CHEK1	NEK1	PDK3	MAP3K9	PRKACB	MAP3K7	EPHB1	ROS1	EPHB4	MAP3K5	EPHB3	ACVR1	CDKL2	CSNK1G3	PRKCI	MUSK	PRPF4B	UHMK1	ULK2	ULK1	SIK1	ALPK3	TNIK	PRKD1	CSNK1G1	PDGFB	TTBK2	STK38L	RIPK1	MARK1	MAP2K6	CDK17	SMAD2	TGFB2	INSR
protein modification by small protein conjugation (GO:0032446)	8.2215e-05	0.0316391	97	UBE2D1	UBE3A	UBE3B	BACH1	HERC4	KIAA1586	NFATC2IP	TRIM24	BTRC	RNF111	ARRDC4	ATG3	RNF44	NOSIP	FBXO11	PIAS2	PIAS1	NUP93	HECW1	UBE2V2	HIST1H2BH	NAIP	KLHL18	NUP205	DCUN1D5	UBA6	KLHL15	DCUN1D3	UBA5	DCUN1D1	UBR3	NEDD4L	FBXO45	RTF1	UBR1	HIF1A	RNF213	UBD	TPR	HLTF	BARD1	BRAP	UBE2H	UBE2A	KLHL24	FBXO32
sprouting angiogenesis (GO:0002040)	0.000195149	0.0650424	18	SEMA5A	CCBE1	ANGPT1	NRARP	SEMA3E	PARVA	FGF2	DLL1	LOXL2	ROBO1	BMP4	NR4A1	RNF213	BMPER	RSPO3	TEK	TDGF1	EPHB4
positive regulation of gene expression (GO:0010628)	0.000197184	0.0650424	168	APP	CNTF	PID1	RORA	AHR	RORB	FGF2	ELK1	CLU	GRIP1	HMGN5	MYC	SMARCAD1	BTRC	RNF111	TP63	MAP3K5	ACVR1	EOMES	DDX17	SMARCC1	ANKRD49	MUSK	ZNF281	F2R	WDR75	SOX11	ANK3	MED4	POU3F3	RUNX2	PIAS2	PIAS1	RUNX1	TBL1XR1	KAT6B	KAT6A	TFAM	PHIP	ZNF398	KMT2A	HPN	PDGFB	TWIST1	PSEN1	FOXO3
negative regulation of gene expression (GO:0010629)	0.000243256	0.0748904	138	APP	NAB1	PRDM5	UBP1	IKZF1	AHR	RORB	ELK3	LOXL2	YY1	ZFP36	RPS6KA5	TRIM27	BTRC	TP63	SFMBT1	ZNF281	ARID5B	TSC1	SOX11	ZBTB33	POU3F3	RUNX2	FOXP1	DKK3	EID1	EID2	ZNF91	SFRP2	KAT6B	KAT6A	PGR	ZNF674	NOTCH2	KHDRBS1	ZNF154	SET	TSHZ3	FOXG1	PDGFB	TWIST1	ZBTB4	HIF1A	FOXO1	ZFP36L2	HMBOX1
positive regulation of nucleic acid-templated transcription (GO:1903508)	0.000283719	0.0818885	115	RORA	AHR	RORB	FGF2	ELK1	GRIP1	HMGN5	MYC	SMARCAD1	BTRC	RNF111	TP63	MAP3K5	ACVR1	EOMES	DDX17	SMARCC1	ANKRD49	ZNF281	F2R	SOX11	MED4	POU3F3	RUNX2	PIAS2	PIAS1	RUNX1	TBL1XR1	KAT6B	KAT6A	TFAM	PHIP	ZNF398	KMT2A	PDGFB	PSEN1	FOXO3	HIF1A	FOXO1	ZKSCAN3	TASP1	HIVEP3	ALX1	NDP	ZNF423	PPARGC1A
regulation of signal transduction (GO:0009966)	0.000415897	0.112977	60	SEMA5A	SCARB2	DDR1	APP	HHIP	NUCKS1	RORA	CLU	RGS4	RGS5	RGS2	UBASH3B	TRIM5	ZIC1	RSPO3	CD36	EPHB1	ROS1	YWHAG	EPHB4	C3ORF58	CD177	DACT1	EPHB3	ACVR1	EPHA6	MUSK	GLRX2	FOXL1	RUNX1	PLSCR1	ELF1	MDFIC	DOK5	BIRC5	ROR1	PRKD1	ROR2	CD46	MET	MGLL	BIRC2	LLGL1	NAIP	BIRC3	ALOX15
astrocyte development (GO:0014002)	0.00067667	0.173604	7	APP	CNTF	CDK6	NF1	PSEN1	FPR2	DLL1
positive regulation of synapse assembly (GO:0051965)	0.000739645	0.179773	12	NLGN1	GRID2	BHLHB9	NLGN2	CLSTN2	BDNF	NRXN1	CLSTN1	IL1RAPL1	EPHB1	VSTM5	EPHB3
3'-UTR-mediated mRNA stabilization (GO:0070935)	0.0012306	0.221139	9	DAZL	ZFP36	DAZ3	TARDBP	MAPK14	YBX3	TIRAP	MYD88	HNRNPA0
negative regulation of small GTPase mediated signal transduction (GO:0051058)	0.00109715	0.221139	12	TGFB2	RASA4	MAPKAP1	SPRY4	NF1	SPRY3	MFN2	SPRY1	RASAL2	STAMBP	CD2AP	ARHGAP12
regulation of cell communication (GO:0010646)	0.00124349	0.221139	23	GRIA2	NLGN1	GRID2	PXK	NLGN2	CXADR	BDNF	GRID1	XIAP	GLRX2	SAMSN1	SLC8A1	TRDN	NCLN	EIF4EBP2	BIRC5	TDGF1	YWHAG	MGLL	BIRC2	C3ORF58	NAIP	BIRC3
positive regulation of endothelial cell migration (GO:0010595)	0.0010043	0.221139	23	SEMA5A	NUS1	CD40	EDN1	ANGPT1	ROCK2	ITGB3	ATP5A1	PDGFB	PROX1	HMGB1	FGF2	HIF1A	FOXP1	BMP4	ADAM17	SP1	AKT3	ATOH8	TEK	PRKD1	MET	TDGF1
regulation of cell death (GO:0010941)	0.00103508	0.221139	29	WISP3	TXNDC12	FGF2	CLU	CYR61	WISP1	CTGF	TBK1	AGR2	CD36	JUNB	EPHB1	ATG5	BNIP3L	DCC	BNIP3	RRAS2	GPR75	TSC1	SOX11	WNT16	SDIM1	BMP4	IMPACT	NOV	APC	PDE12	DLC1	PRKD1
negative regulation of nucleic acid-templated transcription (GO:1903507)	0.00124505	0.221139	100	NAB1	PRDM5	UBP1	IKZF1	AHR	RORB	ELK3	LOXL2	RPS6KA5	BTRC	TP63	SFMBT1	ZNF281	ARID5B	ZBTB33	POU3F3	RUNX2	FOXP1	DKK3	EID1	EID2	ZNF91	SFRP2	KAT6B	KAT6A	ZNF674	KHDRBS1	ZNF154	SET	TSHZ3	FOXG1	PDGFB	TWIST1	ZBTB4	FOXO1	HMBOX1	ATXN1	ZKSCAN3	ZNF148	ZNF423	SNX6	SMAD2	TFAP2A	POU2F1	CBX5	CBX4
positive regulation of cell differentiation (GO:0045597)	0.001198	0.221139	50	CCDC71L	SYAP1	CYR61	CTGF	LOXL2	RPS6KA3	ZFP36	GLIPR2	CD36	HIF1AN	SOX6	JUNB	HOXA5	TP63	CMKLR1	SOX5	CDON	MYOG	ACVR1	MEF2A	SOX11	RUNX2	TGFBR2	CREB1	SFRP2	RAPGEF2	PRKD1	WDFY2	LTF	DLX1	TWIST1	MAPK9	FRZB	GCNT2	BNIP2	ALX1	SMAD2	MSR1	TGFB2	PA2G4	MAPK14	GDF5	ACVR2A	BMP4	RGCC	BAMBI
morphogenesis of an epithelial sheet (GO:0002011)	0.0013874	0.236181	7	TBX20	SOX11	LIN7C	PHACTR4	LRP6	BMP5	ARHGAP12
regulation of neuron apoptotic process (GO:0043523)	0.00143202	0.236181	27	CNTF	SET	BHLHB9	KIF14	SIX1	FAIM2	FOXO3	ERBB3	SIX4	TRIM2	PPARGC1A	TP63	TFAP2A	FOXB1	TGFB2	PRKCI	GRID2	KCNB1	BDNF	F2R	LIG4	SOD2	TOX3	BCL2	NF1	NAIP	CPEB4
regulation of angiogenesis (GO:0045765)	0.00154722	0.246382	46	SEMA5A	ITGB1	CD40	BTG1	ROCK2	PDE3B	TNFAIP3	TWIST1	SEMA3E	KLK3	BRCA1	CXCL13	TSPAN12	THBS2	FGF2	HIF1A	THBS4	MTDH	MECP2	KRIT1	PGK1	ITGB8	CYP1B1	ZNF304	PROK1	HOXA5	TGFB2	SEMA6A	GAB1	HMGA2	HIPK1	RUNX1	TMEM2	SFRP2	RGCC	SP1	AGO1	COL4A3	ADAM12	APLNR	ANGPTL3	NF1	CNTN1	AGGF1	TEK	PRKD1
toll-like receptor signaling pathway (GO:0002224)	0.0018456	0.274935	26	ITGAM	UBE2D1	HMGB1	CTSS	HSP90B1	RPS6KA3	RIPK1	CD36	MAP3K7	MAP3K1	TICAM2	FGG	CD180	IRAK3	IRAK4	TIRAP	TRAF6	TAB3	TLR8	PIK3C3	TLR6	TAB1	TLR3	BIRC2	MYD88	BIRC3
negative regulation of programmed cell death (GO:0043069)	0.00184226	0.274935	92	DDR1	ANKLE2	TNFAIP8	KIF14	FAIM2	TM7SF3	YBX3	SH3RF1	RPS6KA3	DSTYK	HMGN5	SIX4	MYC	MYO18A	EPHB1	ROS1	EPHB4	TP63	EPHB3	BNIP3L	PRKCI	EPHA6	MUSK	PLAUR	SERPINB9	YWHAZ	PRLR	POU3F3	DNAJC3	TMBIM4	TRAF6	YME1L1	BIRC5	ROR1	PHIP	ROR2	ZNF830	MET	SLC25A4	CD44	BIRC2	NAIP	BIRC3	LTF	NOTCH2	KANK2
dosage compensation by inactivation of X chromosome (GO:0009048)	0.00211658	0.296193	5	PCGF5	PCGF3	RLIM	CDYL	BRCA1
glandular epithelial cell development (GO:0002068)	0.00211658	0.296193	5	BMP4	CDK6	PAX6	DLL1	BMP5
regulation of RNA export from nucleus (GO:0046831)	0.00231803	0.297352	8	RBM27	KHDRBS1	SETD2	CPSF6	NCBP2	TPR	IWS1	NUDT4
mRNA 3'-end processing (GO:0031124)	0.00227501	0.297352	23	APP	CPSF7	CPSF6	RBM8A	NCBP2	CSTF2	SRSF1	SSU72	CSTF2T	THOC2	MAGOHB	NUDT21	LSM11	ZC3H11A	SARNP	POLR2D	SRSF2	SRSF3	PAPOLB	PABPC1	SRSF5	GRSF1	SLU7
cell-cell adhesion via plasma-membrane adhesion molecules (GO:0098742)	0.00223296	0.297352	38	ITGB1	TENM1	NLGN1	ITGAM	AMIGO2	ATP2C1	PVR	CLDN1	CDH8	CDH7	ROBO1	FLRT3	PCDHA7	CD177	ACVR1	CD164	TGFB2	GRID2	VCAM1	CXADR	CADM1	SMAGP	CADM2	UNC5D	TGFBR2	CLDN12	CDH11	IL1RAPL1	PCDHB16	PCDHB5	DSG1	CD226	PCDHB4	PCDHB3	SDK2	CDH18	CD200	CDH19
phosphorylation (GO:0016310)	0.00244752	0.30308	87	DGKG	APP	DYRK3	DGKE	GMFB	CCNT1	DGKB	PIK3CB	PIK3CG	RPS6KA3	STK10	DSTYK	RPS6KA6	RPS6KA5	TBK1	AKT3	CHEK1	NEK1	MAP3K9	PRKACB	ROS1	MAP3K5	ACVR1	CDKL2	PRKCI	HUNK	IRAK3	PRPF4B	KSR2	TGFBR2	CREB1	PEAK1	BMP2K	BIRC5	ULK1	SIK1	SGK3	ALPK3	PIK3C3	TNIK	PRKD1	SGK2	DGKI	PRKAA1	PRKAA2	ROCK2
negative regulation of Ras protein signal transduction (GO:0046580)	0.00249394	0.30308	14	TGFB2	MAPKAP1	CCDC125	SPRY4	RASAL2	RASA4	DLC1	NF1	SPRY3	MFN2	SPRY1	STAMBP	MET	SCAI
regulation of endothelial cell proliferation (GO:0001936)	0.00256065	0.303207	24	SEMA5A	CAV2	ITGB3	ATP5A1	PDGFB	NRARP	PROX1	FGF2	HIF1A	THBS4	AIMP1	BMP4	NR4A1	NRAS	RGCC	AKT3	ATOH8	KRIT1	NF1	CNTN1	AGGF1	ANG	TEK	PRKD1
negative regulation of cellular macromolecule biosynthetic process (GO:2000113)	0.00270101	0.311831	111	NAB1	PRDM5	UBP1	IKZF1	AHR	RORB	ELK3	LOXL2	RPS6KA5	ENPP1	BTRC	TP63	SFMBT1	ZNF281	ARID5B	TSC1	ZBTB33	POU3F3	RUNX2	FOXP1	DKK3	EID1	EID2	ZNF91	SFRP2	KAT6B	KAT6A	ZNF674	KHDRBS1	ZNF154	SET	TSHZ3	FOXG1	PDGFB	TWIST1	PDS5A	ZBTB4	FOXO1	HMBOX1	ATXN1	ZKSCAN3	ZNF148	ZNF423	SNX6	SMAD2	TFAP2A
negative regulation of transcription from RNA polymerase II promoter (GO:0000122)	0.00277288	0.312321	121	ZNF177	PRDM5	UBE2D1	NR3C1	IKZF2	BACH1	LOXL2	YY1	ZFP36	ZNF608	MYC	TRIM27	JUNB	TP63	ZNF564	MEF2A	EOMES	ZNF281	ARID5B	SOX11	DICER1	HCFC2	THAP1	EID1	TBL1XR1	ZNF831	ZNF675	ATF3	ZNF431	PSMD10	DLX1	SUPT4H1	ZBTB1	PDGFB	TWIST1	NEDD4L	RTF1	PSEN1	FOXO3	ZBTB4	PHF21A	MTDH	HMBOX1	TPR	ORC2	SMYD2
sodium ion transport (GO:0006814)	0.00287581	0.316203	19	SLC13A1	HCN4	SLC12A1	NEDD4L	ATP1A2	ANO6	SLC5A1	PKD2	SLC4A4	NALCN	SLC8A1	SLC9B2	SCN7A	FGF13	SCN2A	SCN3A	SLC17A2	SCN1A	HCN1
regulation of blood vessel endothelial cell migration (GO:0043535)	0.00313052	0.330433	17	NUS1	CD40	ANGPT1	ATP5A1	PDGFB	PRCP	HMGB1	FGF2	HIF1A	MECP2	ADAM17	RGCC	SP1	AKT3	NF1	AGTR2	PRKD1
positive regulation of endothelial cell proliferation (GO:0001938)	0.00314834	0.330433	21	SEMA5A	ITGB3	PDGFB	NRARP	PROX1	HMGB1	FGF2	HIF1A	THBS4	BMP4	NR4A1	NRAS	ADAM17	SP1	AKT3	APLNR	CNTN1	AGGF1	ANG	TEK	PRKD1
regulation of G1/S transition of mitotic cell cycle (GO:2000045)	0.00322489	0.330945	16	ANKRD17	KANK2	PID1	PRMT2	DCUN1D3	RDX	KIF14	UBE2E2	PKD2	RBL1	LSM11	SLFN11	ZNF655	BRD7	TMEM14B	DACT1
synapse assembly (GO:0007416)	0.00335203	0.336514	20	NLGN1	GRID2	NLGN2	FZD5	BDNF	RYK	NRXN1	PCDHB15	DNM3	FLRT3	SLITRK1	DNER	PCDHB16	SLITRK6	PCDHB5	NRCAM	PCDHB4	PCDHB3	SHANK2	SDK2
regulation of energy homeostasis (GO:2000505)	0.0037357	0.346339	8	PRKAA1	PRKAA2	SGIP1	NR1D2	CD36	PPARGC1A	DLL1	FOXO1
regulation of RNA splicing (GO:0043484)	0.00374988	0.346339	18	SRRM4	TIA1	MBNL2	YTHDC1	CLK4	AFF2	SRPK1	PTBP3	ESRP2	ESRP1	TRA2B	AGGF1	RBM20	SRSF3	ZNF326	MBNL3	SRSF10	RBM22
negative regulation of cell death (GO:0060548)	0.00365546	0.346339	24	KANK2	BNIP3L	BNIP3	AMIGO2	WISP3	TXNDC12	SOX11	TM7SF3	WNT16	FGF2	SORL1	CLU	SDIM1	CYR61	WISP1	CTGF	BMP4	IMPACT	NOV	PDE12	AGR2	PRKD1	PPARGC1A	ATG5
negative regulation of apoptotic process (GO:0043066)	0.00362363	0.346339	105	ANKLE2	CNTF	FAIM2	RPS6KA3	HMGN5	MYC	EPHB1	ROS1	EPHB4	TP63	EPHB3	BNIP3L	PRKCI	EPHA6	MUSK	F2R	LIG4	PRLR	POU3F3	YME1L1	ROR1	PHIP	ROR2	ZNF830	NAIP	NOTCH2	PSMD10	SET	BHLHB9	HPN	VTCN1	PSEN1	HIGD1A	FOXO1	NUGGC	HSP90B1	MTDH	PKHD1	PRDX3	PRDX2	BAG4	FIGNL1	ZNF304	PPARGC1A	BARD1	TFAP2A
positive regulation of vasculature development (GO:1904018)	0.00385362	0.348942	29	SEMA5A	ITGB1	CD40	BTG1	PDGFB	TWIST1	BRCA1	FGF2	HIF1A	MTDH	ITGB8	CYP1B1	ZNF304	HIF1AN	GAB1	HMGA2	HIPK1	RUNX1	SFRP2	SP1	ADAM12	APLNR	ANGPTL3	CNTN1	RAPGEF2	AGGF1	ASB4	TEK	PRKD1
regulation of synapse assembly (GO:0051963)	0.0043017	0.374816	13	NLGN1	GRID2	BHLHB9	NLGN2	MUSK	CLSTN2	BDNF	NRXN1	CLSTN1	IL1RAPL1	PDLIM5	EPHB1	EPHB3
purine ribonucleoside monophosphate metabolic process (GO:0009167)	0.0042944	0.374816	14	ADSL	ENTPD5	GMPS	ATP1A2	AK4	NT5C2	PAICS	CLPX	ATIC	FIGNL1	ENPP1	NDUFS1	HPRT1	GART
positive regulation of cyclin-dependent protein serine/threonine kinase activity involved in G1/S transition of mitotic cell cycle (GO:0031659)	0.00485916	0.411028	5	ADAM17	RGCC	PKD2	EGFR	FGF10
positive regulation of secretion by cell (GO:1903532)	0.00489531	0.411028	17	UNC13B	TGFB2	EDN1	KCNB1	FGG	RAB27A	SOX11	RAB27B	RGCC	MYO18A	STXBP5	ANG	MYH10	PPIA	RAB5A	CLASP2	EXPH5
regulation of epithelial cell migration (GO:0010632)	0.00514138	0.42398	16	DOCK5	TGFB2	HIF1A	PPM1F	CORO1C	PBLD	PTPRG	BMPER	IFNG	GLIPR2	CAPN7	RREB1	ARSB	PFN2	CLASP2	FGF10
transcription, DNA-templated (GO:0006351)	0.0057129	0.454865	79	KDM5A	CREBZF	CCNT2	CRCP	THRB	CCNT1	ASH2L	TTF2	AHR	NR3C1	AFF4	TRPS1	TRIM24	PKNOX1	GABPA	SOX5	MEF2A	NCOA1	KLF11	NCBP2	PAX6	VEZF1	ASH1L	PAX5	MED4	GTF2F2	MLF1	PAX1	THAP1	MAF	MED20	TFAM	ZNF831	CREB5	GTF2A1	GTF2A2	KMT2A	RNMT	SUPT4H1	HOXD13	BAZ2B	RTF1	MLLT3	FOXO3	HIF1A	IWS1
positive regulation of MAPK cascade (GO:0043410)	0.00565003	0.454865	66	DDR1	APP	TENM1	CD40	CCL4L1	DUSP19	HTR2C	PTPN22	HMGB1	FGF2	PIK3CG	CTGF	ROBO1	DSTYK	BMPER	GLIPR2	TRIM5	CCR7	CD36	EPHB1	ROS1	EPHB4	EPHB3	EDN1	EPHA6	MUSK	FCRL3	FGG	F2R	KSR2	TIRAP	RAPGEF2	ROR1	IAPP	ROR2	MET	CD44	NOTCH2	CCL13	ALOX15	C5AR1	LPAR1	PDGFB	FPR2	EGFR	ERBB3
phospholipid translocation (GO:0045332)	0.00662467	0.509878	9	TMEM30A	ATP8B3	ATP8A2	ABCB1	ATP8A1	ATP10D	ATP11B	ATP10A	ATP9B
positive regulation of T cell mediated immunity (GO:0002711)	0.00662467	0.509878	9	FAM49B	FZD5	IL23A	TNFSF4	TRAF6	STX7	ZBTB1	B2M	MAP3K7
positive regulation of mitochondrial membrane permeability involved in apoptotic process (GO:1902110)	0.00941997	0.522327	5	STPG1	BNIP3L	RHOT1	BNIP3	BLOC1S2
negative regulation of cellular senescence (GO:2000773)	0.00840226	0.522327	6	RBL1	CDK6	AKT3	ZKSCAN3	HMGA2	TWIST1
MyD88-dependent toll-like receptor signaling pathway (GO:0002755)	0.00735948	0.522327	11	MAP3K1	TRAF6	TAB3	IRAK3	CD36	TLR6	TAB1	IRAK4	MAP3K7	TIRAP	MYD88
regulation of nuclear-transcribed mRNA poly(A) tail shortening (GO:0060211)	0.00840226	0.522327	6	TNRC6C	ZFP36	CNOT7	PABPC1	CPEB3	TNRC6B
regulation of nuclear-transcribed mRNA catabolic process, deadenylation-dependent decay (GO:1900151)	0.00705102	0.522327	7	TNRC6C	ZFP36	CNOT7	PABPC1	CPEB3	ZFP36L2	TNRC6B
positive regulation of cyclin-dependent protein serine/threonine kinase activity (GO:0045737)	0.00969963	0.522327	11	PSMD10	ADAM17	CCNT2	RGCC	CCNT1	PDGFB	CCNC	PROX1	PKD2	EGFR	FGF10
positive regulation of nuclear-transcribed mRNA poly(A) tail shortening (GO:0060213)	0.00840226	0.522327	6	TNRC6C	ZFP36	CNOT7	PABPC1	CPEB3	TNRC6B
lipid translocation (GO:0034204)	0.00927904	0.522327	9	TMEM30A	ATP8B3	ATP8A2	ABCB1	ATP8A1	ATP10D	ATP11B	ATP10A	ATP9B
heart trabecula morphogenesis (GO:0061384)	0.00846675	0.522327	8	TGFB2	BMP10	HEY1	POLR2D	S1PR1	TEK	BMP5	BMPR1A
sulfur amino acid metabolic process (GO:0000096)	0.00927904	0.522327	9	NFS1	GCLC	AHCY	CTH	BHMT2	MTR	ADO	CDO1	PCYOX1
negative regulation of cell cycle G1/S phase transition (GO:1902807)	0.00927904	0.522327	9	KANK2	RBL1	SLFN11	PRMT2	DCUN1D3	ZNF655	PKD2	BRD7	DACT1
regulation of exocytosis (GO:0017157)	0.00965351	0.522327	16	RAB3B	NSF	FGG	RAB27A	RAB27B	STXBP5L	RAB10	RAB40A	RAB37	IL1RAPL1	STXBP5	HAP1	RAB5A	LLGL1	CLASP2	EXPH5
mRNA stabilization (GO:0048255)	0.00737856	0.522327	12	DAZL	SYNCRIP	ZFP36	IGF2BP1	DAZ3	PABPC1	TARDBP	MAPK14	YBX3	TIRAP	MYD88	HNRNPA0
RNA splicing (GO:0008380)	0.009805	0.522327	28	DBR1	SF3B3	RNPC3	DCAF4	SYNCRIP	SNRPD1	TRA2B	SNRPD3	TXNL4A	SF3B1	PPARGC1A	SRSF10	BCAS2	IVNS1ABP	NCBP2	SCAF11	PRPF4B	ZCRB1	MAGOHB	SRPK1	SMU1	SFPQ	DDX19B	NOVA1	SRSF2	PPIG	TARDBP	SLU7
regulation of histone acetylation (GO:0035065)	0.00964646	0.522327	10	RPS6KA5	SET	PAXIP1	TADA2A	KMT2A	CHEK1	BRCA1	BRD7	PPARGC1A	IWS1
central nervous system development (GO:0007417)	0.00800271	0.522327	51	ANKLE2	UBE3A	HNMT	PKD2	AFF2	PHF8	RPS6KA3	RPS6KA6	NIPBL	ZIC2	DNER	ZIC1	NRCAM	SH3GL2	EOMES	LIG4	PAX6	SOX11	PROX1	POU3F3	SHROOM4	TGFBR2	VCAN	ALDH5A1	COL4A1	DCX	AGTR2	HAP1	TBC1D23	PAFAH1B2	AMIGO2	ADAM22	PCDH18	DLL1	SNTG2	GRIN2A	ATXN1	PTPRZ1	NHLH1	PDGFC	NPTX1	ARNT2	POU6F2	GRIN2B	GRHL2	DCLK1
regulation of JUN kinase activity (GO:0043506)	0.00953697	0.522327	12	EDN1	TAOK3	TRAF6	DUSP19	PTPN22	TLR6	AIDA	MAP3K7	ZNF675	HIPK3	ARHGEF5	MAP3K5
negative chemotaxis (GO:0050919)	0.00964646	0.522327	10	SEMA5A	SEMA4A	SEMA3C	ITGB3	SEMA4C	ITGAV	SEMA3E	SEMA4F	SLIT3	ROBO1
cell-cell junction organization (GO:0045216)	0.00779965	0.522327	21	TGFB2	PRKCI	NLGN2	CXADR	CADM1	CADM2	CTNND1	F2R	PVR	CLDN1	CDH8	CDH7	TJP1	GJC1	CDH11	DSG1	ANG	SDK2	CDH18	CDH19	CD177
mRNA processing (GO:0006397)	0.00794808	0.522327	64	DBR1	PPWD1	HNRNPR	ELAVL2	SYNCRIP	METTL14	SART3	SNRPD1	SNRPD3	TXNL4A	BCAS2	CMTR2	SRRM4	USP49	NCBP2	SCAF11	PRPF40A	PRPF4B	PLRG1	THOC2	ZCRB1	WBP11	GTF2F2	SFPQ	ZC3H11A	SARNP	SRSF2	SNRNP27	SRSF3	SNRPE	PABPC1	SRSF5	SLU7	RBM22	SF3B3	RBM8A	RNMT	CSTF2	SRSF1	SUPT4H1	CSTF2T	RNPC3	TRA2B	POLR2D	POLR2F	SNRPB2
DNA-templated transcription, termination (GO:0006353)	0.009805	0.522327	28	RBM8A	CSTF2	SRSF1	CSTF2T	TTF2	TAF1D	LSM11	TAF1B	TWISTNB	TAF1A	POLR2F	SNRPD3	CPSF7	NCBP2	SSU72	THOC2	MAGOHB	GTF2H5	NUDT21	ZC3H11A	POLR1B	SARNP	SRSF2	SRSF3	SNRPE	SRSF5	POLR3K	SLU7
DNA-templated transcription, initiation (GO:0006352)	0.00725023	0.522327	45	NOTCH2	YAP1	GTF2A1	GTF2A2	CRCP	THRB	MAML2	CCNC	RORA	NR2E1	RORB	ZNF45	NR3C1	NR2C2	PPM1D	CTGF	TAF1D	MED13	TAF1B	TWISTNB	POLR2D	TAF1A	POLR2F	PPARGC1A	TEAD1	TEAD2	TAF15	ESRRG	NR1D2	MED4	ESR1	GTF2F2	MED6	RUNX2	GTF2H5	NR4A2	NR4A1	KAT2B	NR5A2	POLR1B	MED20	TFAM	TAF4B	PGR	TAF3
generation of neurons (GO:0048699)	0.00984029	0.522327	33	YAP1	MTPN	WNT2B	SIX1	DLL1	OPHN1	SIX4	DNER	NRCAM	DISC1	MARK1	TGFB2	FZD3	MYEF2	FZD5	RYK	ATP2B2	SOX11	PROX1	THOC2	WNT16	PEX13	PHOX2B	RUNX2	RUNX1	NR4A2	TUBB2B	CDK6	IL1RAPL1	DCX	RAPGEF2	FGF13	PAFAH1B1
termination of RNA polymerase II transcription (GO:0006369)	0.00848859	0.522327	20	CPSF7	RBM8A	NCBP2	CSTF2	SRSF1	SSU72	CSTF2T	TTF2	THOC2	MAGOHB	NUDT21	LSM11	ZC3H11A	SARNP	SRSF2	SRSF3	SNRPE	SNRPD3	SRSF5	SLU7
negative regulation of neuron apoptotic process (GO:0043524)	0.00772409	0.522327	19	FOXB1	PRKCI	CNTF	SET	BHLHB9	BDNF	F2R	KIF14	LIG4	SIX1	SOD2	HIF1A	TOX3	ERBB3	SIX4	BCL2	PPARGC1A	NAIP	CPEB4
positive regulation of NF-kappaB transcription factor activity (GO:0051092)	0.00775046	0.522327	33	MTPN	APP	CD40	TRIM52	CLU	MTDH	PRDX3	RPS6KA5	DHX33	TRIM5	RIPK1	CD36	MAP3K7	TRIM22	PRKCI	EIF2AK2	IRAK3	TRAF1	IRAK4	TIRAP	FER	TRAF6	UBE2N	TAB3	TRIM37	ROR1	TLR6	PRKD1	TRIM38	TAB1	TRIM32	MYD88	LTF
protein dephosphorylation (GO:0006470)	0.00964423	0.522327	32	PHLPP2	PHLPP1	PTPN22	DUSP18	PPM1D	RPAP2	PPM1E	PPM1F	MTMR7	PPP1CB	PPP1CC	PTPRZ1	PPP4R2	UBASH3B	BTRC	DUSP2	PTPRN2	PPP1R12A	DUSP3	EYA1	EYA4	SSU72	DUSP28	PTPN13	SSH2	PTPN14	SSH1	PPM1A	PPP2R2B	CTDSP2	PTPN5	PTPN2
regulation of mitochondrial translation (GO:0070129)	0.0107322	0.535821	7	TRMT10C	UQCC2	ALKBH1	UQCC1	NSUN3	MPV17L2	MALSU1
negative regulation of cell aging (GO:0090344)	0.0107322	0.535821	6	RBL1	CDK6	AKT3	ZKSCAN3	HMGA2	TWIST1	2019-03-05
mesenchyme morphogenesis (GO:0072132)	0.0107322	0.535821	7	ACVR1	SMAD2	HEYL	TGFB2	HEY1	TBX20	BMPR1A
endocardial cushion morphogenesis (GO:0003203)	0.0107322	0.535821	7	ACVR1	HEYL	TGFB2	HEY1	TBX20	TGFBR2	BMPR1A
positive regulation of epithelial cell migration (GO:0010634)	0.0107907	0.535821	21	DOCK5	TGFB2	EDN1	ANGPT1	ROCK2	ITGB3	PROX1	HIF1A	PPM1F	FOXP1	BMP4	IFNG	GLIPR2	CAPN7	ATOH8	TEK	PRKD1	TDGF1	RREB1	CLASP2	FGF10
negative regulation of cellular process (GO:0048523)	0.0102122	0.535821	110	SEMA5A	APP	TES	ATP8A2	TXNDC12	FGF2	CLU	CTGF	GJA1	MYC	ENPP1	CYP1B1	BNIP3L	ACTN1	F2R	TSC1	SOX11	SDIM1	SFRP2	THAP5	PDE12	COL4A3	AGTR2	PRKD1	ROR2	DCUN1D3	NAIF1	NEDD4L	PKHD1	ORC6	SMYD2	TP53BP2	LPXN	PLXNA3	ATG5	ZBTB7C	TFAP2A	CD164	TGFB2	BTN2A2	EIF2AK2	INHBA	SMARCA2	2019-03-05	AICDA	CHERP
branching morphogenesis of an epithelial tube (GO:0048754)	0.0109841	0.539621	14	SIX1	NRARP	SEMA3E	HOXD11	PKD2	FGF2	LRP6	TGFBR2	BMP4	SFRP2	COL4A1	MYC	MET	FGF10
positive regulation of reactive oxygen species metabolic process (GO:2000379)	0.0116068	0.563353	13	CRP	PID1	ITGAM	PDGFB	RAB27A	FPR2	F2	MAPK14	TGFBR2	RIPK1	CD36	TLR6	CD177
positive regulation of ossification (GO:0045778)	0.0117111	0.563353	16	ACVR1	TFAP2A	TGFB2	SOX11	ANO6	ACVR2A	CYR61	SLC8A1	RUNX2	P2RX7	BMP4	PRKD1	GPM6B	TP63	LTF	BMPR1A
hexose transmembrane transport (GO:0035428)	0.0120571	0.56697	8	SLC2A9	EDNRA	SLC2A10	SLC2A13	SLC2A12	SLC2A3	SLC5A1	PPBP
production of small RNA involved in gene silencing by RNA (GO:0070918)	0.0120571	0.56697	8	TSNAX	AGO3	AGO1	DROSHA	DICER1	TSN	TARBP2	PUM2
lipid phosphorylation (GO:0046834)	0.0121546	0.56697	12	DGKG	PIKFYVE	SMG1	DGKE	DGKB	PIK3C3	PIK3CB	PIK3C2A	FAM126A	DGKI	PIK3CG	PI4K2A
positive regulation of release of sequestered calcium ion into cytosol (GO:0051281)	0.0125724	0.575434	11	CXCL10	TRPC1	F2R	APLNR	CALM3	AKAP6	HAP1	F2	PKD2	CALM1	TRDN
protein K48-linked ubiquitination (GO:0070936)	0.0126109	0.575434	14	UBE2H	SYVN1	TNFAIP3	UBE2D1	UBE2E2	NEDD4L	UBE3A	UBE2A	UBE2G2	2019-03-06	UBE2R2	TTC3	RFFL	RNF152	UBE2K
transition metal ion transport (GO:0000041)	0.0127804	0.575434	10	SLC30A9	SLC30A8	TRPC3	HEPH	TRPC4	SLC31A1	TRPC1	SLC30A5	SLC11A2	ATOX1
protein ubiquitination (GO:0016567)	0.0128345	0.575434	103	RNF19B	UBE2D1	UBE3A	UBE3B	BACH1	HERC4	TRIM24	PSMD1	BTRC	RNF111	ARRDC4	ATG3	RNF44	WSB1	NHLRC3	NOSIP	FBXO11	FBXW2	RC3H2	TRIM17	HECW1	UBE2V2	HIST1H2BH	NAIP	KLHL18	PSMD10	UBA6	KLHL15	UBR3	KLHL11	NEDD4L	FBXO45	RTF1	UBR1	HIF1A	FBXO40	RNF213	UBD	HLTF	RNF217	LONRF3	LONRF2	BARD1	BRAP	UBE2H	LNPEP
mitochondrial outer membrane permeabilization (GO:0097345)	0.0134018	0.575514	6	MOAP1	BNIP3L	BCL2L11	RHOT1	BNIP3	BLOC1S2
pre-mRNA cleavage required for polyadenylation (GO:0098789)	0.0134018	0.575514	6	NUDT21	CPSF7	CPSF6	NCBP2	CSTF2	CSTF2T
pulmonary valve morphogenesis (GO:0003184)	0.0134018	0.575514	6	NOTCH2	BMP4	HEYL	TGFB2	HEY1	TBX20
cell differentiation in hindbrain (GO:0021533)	0.0134018	0.575514	6	GRID2	AGTPBP1	OPHN1	FAIM2	PROX1	PHOX2B
positive regulation of viral life cycle (GO:1903902)	0.0135252	0.575514	14	TOP2A	VPS4A	VPS37B	IFIT1	TARBP2	SRPK1	NR5A2	CNOT7	PDE12	CHMP2B	TRIM38	PABPC1	PPIA	TRIM11
small GTPase mediated signal transduction (GO:0007264)	0.013584	0.575514	26	SHC3	RAP1GDS1	PLD1	FGF2	NRAS	KRIT1	G3BP2	ZNF304	RREB1	BRAP	USP8	ARHGEF37	KSR2	IPCEF1	MAPK14	CNKSR2	ARHGAP32	RIT1	CNKSR3	NF1	RAPGEF2	KRAS	RAB38	PRKD1	RGL1	SOS1
positive regulation of vascular endothelial cell proliferation (GO:1905564)	0.0162459	0.581593	5	ADAM17	SP1	AKT3	HMGB1	FGF2
regulation of chemokine-mediated signaling pathway (GO:0070099)	0.0183873	0.581593	4	EDN1	SLIT3	HIF1A	ROBO1
positive regulation of RNA export from nucleus (GO:0046833)	0.0183873	0.581593	4	RBM27	KHDRBS1	CPSF6	NCBP2
positive regulation of nucleobase-containing compound transport (GO:0032241)	0.0183873	0.581593	4	RBM27	KHDRBS1	CPSF6	NCBP2
blood vessel endothelial cell proliferation involved in sprouting angiogenesis (GO:0002043)	0.0183873	0.581593	4	SEMA5A	BMP4	BMPER	NRARP
type B pancreatic cell development (GO:0003323)	0.0183873	0.581593	4	BMP4	CDK6	DLL1	BMP5
myeloid leukocyte mediated immunity (GO:0002444)	0.0162459	0.581593	5	CXCL6	ADAM17	SERPINB9	IRAK4	CXCL5
negative regulation of phospholipase activity (GO:0010519)	0.0183873	0.581593	4	RGS2	ANGPTL3	PLA2R1	BICD1
negative regulation of necroptotic process (GO:0060546)	0.0183873	0.581593	4	SLC25A4	YBX3	BIRC2	BIRC3
detection of mechanical stimulus involved in sensory perception (GO:0050974)	0.0162459	0.581593	5	MKKS	COL11A1	HPN	PIEZO2	SCN1A
smooth muscle tissue development (GO:0048745)	0.0183873	0.581593	4	BMP4	NF1	PROX1	MYLK
regulation of skeletal muscle satellite cell proliferation (GO:0014842)	0.0183873	0.581593	4	MYOG	ANGPT1	FGF2	EPHB1
regulation of sarcomere organization (GO:0060297)	0.0183873	0.581593	4	AKAP13	BMP10	EDN1	PROX1
heterochromatin organization (GO:0070828)	0.0162459	0.581593	5	SETD7	HP1BP3	SNAI1	HMGA2	LOXL2
atrioventricular valve development (GO:0003171)	0.0162459	0.581593	5	ACVR1	HEYL	TGFB2	TBX20	TGFBR2
production of siRNA involved in RNA interference (GO:0030422)	0.0162459	0.581593	5	TSNAX	DROSHA	DICER1	TSN	TARBP2
positive regulation of autophagy (GO:0010508)	0.0151759	0.581593	19	SH3GLB1	BNIP3L	SCOC	PRKAA1	PRKAA2	BNIP3	GNAI3	PIK3CB	FOXO1	CAMKK2	MTDH	TBK1	IFNG	PRKD1	RNF152	MAP3K7	OPTN	PAFAH1B2	TRIM22
regulation of epithelial cell proliferation (GO:0050678)	0.0161045	0.581593	20	TGFB2	HPN	C5AR1	PEX2	GDF5	EGFR	MTSS1	BMP5	PBLD	NME1	BMP4	NR4A1	ZFP36	SFRP2	CDK6	SIX4	MYC	ZNF304	PRKD1	FGF10
regulation of protein homodimerization activity (GO:0043496)	0.0156298	0.581593	7	STPG1	GNL3L	HSPA5	SYAP1	BCL2	AIDA	TIRAP
astrocyte activation (GO:0048143)	0.0183873	0.581593	4	APP	CNTF	PSEN1	FPR2
heart trabecula formation (GO:0060347)	0.0183873	0.581593	4	BMP10	HEY1	POLR2D	TEK
regulation of cardiac muscle hypertrophy in response to stress (GO:1903242)	0.0183873	0.581593	4	BMP10	TRPC3	ATP2B4	FOXO1
positive regulation of nuclear-transcribed mRNA catabolic process, deadenylation-dependent decay (GO:1900153)	0.0156298	0.581593	7	TNRC6C	ZFP36	CNOT7	PABPC1	CPEB3	ZFP36L2	TNRC6B
regulation of toll-like receptor signaling pathway (GO:0034121)	0.0166502	0.581593	8	OTUD4	FCRL3	IRAK3	CD36	LGR4	TLR3	BIRC2	BIRC3
positive regulation of cytokine production (GO:0001819)	0.016096	0.581593	50	FAM49B	CRCP	PTPN22	RORA	HMGB1	BRCA1	TBK1	CYP1B1	CCR7	MAP3K7	HAVCR2	CCBE1	NFAM1	TIRAP	RUNX1	ADAM17	IFNG	IL23A	TRAF6	TLR6	CD46	TLR3	ANKRD17	PTGER4	PTGS2	HIF1A	DHX33	DHX36	POLR2F	RIPK1	LURAP1	IL33	FZD5	CADM1	TSLP	EIF2AK2	SULF2	PUM2	MAPK13	POLR3A	RGCC	POLR3D	TNFSF4	POLR3E	POLR3F	HLA-DPB1
negative regulation of G1/S transition of mitotic cell cycle (GO:2000134)	0.016885	0.581593	9	KANK2	RBL1	SLFN11	PRMT2	DCUN1D3	ZNF655	PKD2	BRD7	DACT1
transcription initiation from RNA polymerase II promoter (GO:0006367)	0.017338	0.581593	38	NOTCH2	YAP1	GTF2A1	GTF2A2	THRB	MAML2	CCNC	RORA	NR2E1	RORB	ZNF45	NR3C1	NR2C2	PPM1D	CTGF	MED13	POLR2D	POLR2F	PPARGC1A	TEAD1	TEAD2	TAF15	ESRRG	NR1D2	MED4	ESR1	GTF2F2	MED6	RUNX2	GTF2H5	NR4A2	NR4A1	KAT2B	NR5A2	MED20	TAF4B	PGR	TAF3
regulation of apoptotic process (GO:0042981)	0.0159123	0.581593	161	ANKLE2	FAIM2	CLU	IFIT2	RPS6KA3	STK10	HMGN5	MYC	TRIM24	NEK1	CYP1B1	EPHB1	ROS1	EPHB4	HOXA5	TP63	MAP3K5	EPHB3	UNC13B	BNIP3L	PRKCI	EPHA6	MUSK	ACTN1	PRLR	POU3F3	SFRP2	YME1L1	ROR1	IAPP	PHIP	TNIK	ROR2	ZNF830	NAIP	NOTCH2	PSMD10	PXT1	DCUN1D3	HPN	VTCN1	OMA1	PSEN1	HIGD1A	FOXO3	FOXO1
positive regulation of blood vessel endothelial cell migration (GO:0043536)	0.016497	0.581593	14	NUS1	CD40	ANGPT1	ATP5A1	PDGFB	HMGB1	PTGS2	PIK3C2A	FGF2	HIF1A	ADAM17	SP1	AKT3	PRKD1
sodium ion transmembrane transport (GO:0035725)	0.0152892	0.581593	12	SLC13A1	HCN4	SLC12A1	SCN7A	ANO6	PKD2	SCN2A	SCN3A	NALCN	SLC8A1	SCN1A	HCN1
hemopoiesis (GO:0030097)	0.0146372	0.581593	21	NOTCH2	CD164	TGFB2	KMT2A	ZNF160	RTKN2	TET2	ASH2L	INHBA	HIPK1	DLL1	TIRAP	RUNX2	ZFP36L2	TGFBR2	RUNX1	BMP4	PRDX3	SNRK	KAT6A	TEK
positive regulation of I-kappaB kinase/NF-kappaB signaling (GO:0043123)	0.0142826	0.581593	39	ANKRD17	APP	CD40	GOLT1B	LPAR1	IFIT5	ATP2C1	MTDH	AKAP13	GJA1	TBK1	CASP10	TRIM5	UBD	CCR7	RIPK1	MAP3K7	LURAP1	TRIM22	TICAM2	F2R	ZDHHC13	IRAK4	TIRAP	PPM1A	IL23A	TRAF6	UBE2N	REL	ROR1	TLR6	PRKD1	TRIM38	TRIM32	TLR3	BIRC2	MYD88	BIRC3	LTF
renal system development (GO:0072001)	0.0182482	0.581593	17	TFAP2A	TGFB2	MME	C1GALT1	SIX1	PROX1	TBX18	SULF2	PKHD1	NUP93	BMP4	CENPF	POLR2D	NPHP3	HAS2	ITGA6	KCTD11
brain development (GO:0007420)	0.0148659	0.581593	30	AMIGO2	UBE3A	HNMT	PCDH18	AFF2	PHF8	NIPBL	GRIN2A	ATXN1	ZIC2	ZIC1	EOMES	ARNT2	MKKS	PROX1	GRIN2B	GRHL2	SHROOM4	TGFBR2	CENPF	COL4A1	NF1	RAPGEF2	CNTN4	AGTR2	HAP1	TBC1D23	SHANK2	PAFAH1B2	PAFAH1B1
calcium ion transmembrane transport (GO:0070588)	0.0159968	0.581593	23	SLC24A2	TRPC3	TRPC4	TRPC1	ATP2B4	ATP2A2	ANO6	PKD2	ATP2C1	GRIN2B	NALCN	SLC8A1	TMCO1	CACNG8	GRIN2A	YME1L1	PMPCB	ITGAV	TRPM7	MICU3	TRPM6	TRPM3	MCU
negative regulation of protein phosphorylation (GO:0001933)	0.0142488	0.581593	42	PSMD10	PID1	DUSP19	LRRC4	TWIST1	LDLRAD4	PPM1E	SAMSN1	PPM1F	CORO1C	LRP6	PBLD	PREX2	DEPTOR	UBASH3B	FLRT2	FLRT3	LRRTM4	SNX25	ENPP1	TRIM27	LRRC4C	YWHAG	SOCS4	DUSP3	PAQR3	LRRC66	ASPN	TARBP2	P2RX7	DNAJC3	IMPACT	SFRP2	GNAQ	DNAJC10	CNKSR3	NF1	FGFR1OP	CALM3	SMCR8	TARDBP	CALM1
inorganic cation transmembrane transport (GO:0098662)	0.0172316	0.581593	34	SLC24A2	HCN4	COX15	SLC41A1	ATP2A2	PKD2	ATP2C1	NALCN	SLC8A1	CACNG8	SLC39A6	SCN7A	ITGAV	TRPM7	SCN3A	TRPM6	ATP6V1C1	TRPM3	SCN1A	SLC13A1	SLC30A6	SLC30A8	TRPC3	TRPC4	TRPC1	SLC30A5	SLC12A1	SLC11A2	ATP2B4	ANO6	SLC39A14	TMCO1	SCN2A	HCN1
modification-dependent protein catabolic process (GO:0019941)	0.0190829	0.599489	34	RNF11	UBA6	KLHL15	UBR3	UBE2D1	NEDD4L	FBXO45	RCHY1	CBL	RNF213	KCTD21	UBD	RNF217	RFFL	BTRC	RNF20	UBL4A	UBE2H	RANBP3	SYVN1	UBE2A	UBE2G2	FBXO11	KCTD6	UBE2R2	RNF128	KLHL8	TTC3	RLIM	TRIP12	TRIM32	FBXL4	UBE2K	PCYOX1
inorganic anion transmembrane transport (GO:0098661)	0.019488	0.60808	18	GABRA2	GABRB3	GABRB2	GABRA1	CLIC5	GABRB1	SLC20A2	GABRA4	SLC12A1	GABRA3	SLC1A1	ANO6	CLCN3	CLCN5	CLCN4	SLC26A7	SLC26A9	XPR1
response to iron ion (GO:0010039)	0.0201571	0.610113	6	TFAP2A	SLC11A2	BCL2	ACO1	B2M	HIF1A
mRNA cleavage involved in mRNA processing (GO:0098787)	0.0201571	0.610113	6	NUDT21	CPSF7	CPSF6	NCBP2	CSTF2	CSTF2T
pre-miRNA processing (GO:0031054)	0.0201571	0.610113	6	ZCCHC11	AGO3	AGO1	DROSHA	DICER1	TARBP2
negative regulation of signaling (GO:0023057)	0.0202138	0.610113	22	ACVR1	BRAP	DDR1	EPHA6	MUSK	RYK	HHIP	INSR	OSM	AP1AR	EGFR	UBASH3B	ERBB3	ROR1	TEK	ROR2	MET	EPHB1	ROS1	OPTN	EPHB4	EPHB3
positive regulation of epithelial cell proliferation (GO:0050679)	0.02007	0.610113	27	SEMA5A	ITGB3	HPN	C5AR1	PDGFB	NRARP	FGF2	HIF1A	EGFR	THBS4	NRAS	MYC	AKT3	ZNF304	RREB1	SOX11	PROX1	BMP5	NME1	BMP4	NR4A1	CNTN1	AGGF1	ANG	TEK	PRKD1	FGF10
Ras protein signal transduction (GO:0007265)	0.0204653	0.613694	50	RAB3B	RND2	RND3	FGF2	RAB22A	RAB44	PHACTR4	RAB2A	USP8	RHOH	KSR2	IPCEF1	RAB33B	CNKSR2	RAB30	RAP2B	RAB37	CNKSR3	RAPGEF2	RAB38	PRKD1	SOS1	KPNB1	RAB1A	SHC3	RHOBTB3	PLD1	NRAS	RAB40A	RHOT1	RAB23	G3BP2	ZNF304	RAB6A	CTNNAL1	RREB1	BRAP	RAB4A	RAB39A	ARHGAP29	RAB27A	RAB39B	RAB27B	MAPK14	RAB10	RIT1
regulation of B cell receptor signaling pathway (GO:0050855)	0.0219235	0.628486	7	ELF1	NFAM1	FCRL3	LPXN	PTPN22	PAX5	RUNX1
positive regulation of interleukin-12 production (GO:0032735)	0.0220473	0.628486	9	IFNG	IL23A	TNFSF4	CCR7	HMGB1	LTB	MAPK14	TLR3	TIRAP
embryo development ending in birth or egg hatching (GO:0009792)	0.0219235	0.628486	7	TGFB2	NR5A2	MFRP	UBR3	BRCA1	TDGF1	RAI2
positive regulation of nitric oxide biosynthetic process (GO:0045429)	0.0220473	0.628486	9	EDN1	IFNG	INSR	CD36	TLR6	AGTR2	PTGS2	PKD2	CLU
RNA splicing, via transesterification reactions (GO:0000375)	0.0220473	0.628486	9	DBR1	SF3B3	SCAF11	TRA2B	TXNL4A	SF3B1	SLU7	SRSF10	BCAS2
positive regulation of nitric oxide metabolic process (GO:1904407)	0.0220473	0.628486	9	EDN1	IFNG	INSR	CD36	TLR6	AGTR2	PTGS2	PKD2	CLU
positive regulation of histone modification (GO:0031058)	0.0212515	0.628486	10	NIPBL	RPS6KA5	PAXIP1	SART3	TADA2A	UBE2N	TET1	BRCA1	BRD7	PPARGC1A
regulation of MAPK cascade (GO:0043408)	0.0214376	0.628486	46	PSMD10	DDR1	CD40	BMP10	PHLPP1	DUSP19	LPAR1	PDGFB	HMGB1	CYR61	EGFR	PKHD1	ERBB3	DHX33	TRIM5	MAPK1	EPHB1	ROS1	EPHB4	EPHB3	GDF11	TGFB2	DUSP3	EPHA6	CAV2	RYK	INSR	FCRL3	F2R	OSM	KSR2	INHBA	GDF5	BMP5	P2RX7	BMP4	NF1	NEK10	FAS	ROR1	IAPP	KCTD11	TEK	ROR2	MET	FGF10
positive regulation of angiogenesis (GO:0045766)	0.0222008	0.628976	26	SEMA5A	ITGB1	CD40	BTG1	TWIST1	BRCA1	FGF2	HIF1A	DLL1	MTDH	ITGB8	CYP1B1	ZNF304	GAB1	HMGA2	HIPK1	RUNX1	SFRP2	SP1	ADAM12	APLNR	ANGPTL3	CNTN1	AGGF1	TEK	PRKD1
cellular protein modification process (GO:0006464)	0.0224415	0.63192	193	APP	PGAP1	GMFB	LRR1	DCAF4	RPS6KA3	RPS6KA6	RPS6KA5	TBK1	STS	PPP4R2	EVA1A	KIAA1586	AKT3	CHEK1	PSMD1	SEPHS1	BTRC	PRKACB	ACVR1	ATG3	PRKCI	WSB1	ULK1	SIK1	ALPK3	PRKD1	ALG10B	DCUN1D3	SDC2	DCUN1D1	PDGFB	HIF1A	MTMR7	ARSK	STK38L	ST3GAL6	ARSB	ATG5	CDK17	PTPRN2	YES1	ST8SIA2	INSR	EIF2AK2	WDYHV1
axon guidance (GO:0007411)	0.0230493	0.643184	37	SHC3	SEMA3C	NRXN1	CXCR4	PIK3CB	ROBO1	NRAS	RPS6KA5	OPHN1	KIF5C	KIF3A	KIF5B	CHN1	GRB10	TNR	MAPK1	SLIT3	EPHB1	PLXNA3	EPHB3	SPTBN2	SEMA6A	BDNF	RYK	DCC	GAB1	UNC5C	SEMA4F	FRS2	GFRA1	CREB1	DOK5	NFIB	DOK6	KRAS	CNTN4	SOS1
protein modification by small protein removal (GO:0070646)	0.0231201	0.643184	57	WDR48	USP31	KDM1B	USP32	OTUD7B	TNFAIP3	UBE2D1	BRCA1	MYSM1	SENP6	YY1	OTUD6B	MYC	PSMD1	MAP3K7	USP46	USP8	USP48	USP49	USP6	USP44	USP45	ACTR8	UCHL3	UCHL5	SENP1	KAT2B	RNF128	TRAF6	STAMBP	BIRC2	BIRC3	USP13	PSMD10	USP15	INO80D	USP16	HIF1A	RHOT1	TNKS2	RIPK1	BARD1	USP24	SMAD2	USP25	IL33
heterophilic cell-cell adhesion via plasma membrane cell adhesion molecules (GO:0007157)	0.0239022	0.657025	14	CD164	TENM1	NLGN1	GRID2	VCAM1	CXADR	CADM1	SMAGP	CADM2	AMIGO2	PVR	IL1RAPL1	CD226	CD200
Rab protein signal transduction (GO:0032482)	0.0237776	0.657025	19	RAB2A	RAB3B	RAB1A	RAB4A	RAB39A	RAB27A	RAB39B	RAB27B	RAB22A	RAB33B	RAB10	RAB44	RAB30	RAB40A	RAB37	RAB23	RAB38	RAB6A	RAB5A
pulmonary valve development (GO:0003177)	0.0257052	0.660657	5	NOTCH2	BMP4	HEYL	TGFB2	HEY1
muscle cell migration (GO:0014812)	0.0257052	0.660657	5	DDR1	NOV	ITGB3	SIX1	THBS4
regulation of protein insertion into mitochondrial membrane involved in apoptotic signaling pathway (GO:1900739)	0.0267524	0.660657	10	PPP3R1	BCL2L11	TFDP1	TFDP2	BCL2	TP53BP2	DYNLL2	YWHAZ	YWHAG	TP63
regulation of developmental growth (GO:0048638)	0.0267524	0.660657	10	APP	MBD5	NIPBL	MUSK	SIX4	INSR	AGR2	SIX1	NRCAM	DLL1
positive regulation of reactive oxygen species biosynthetic process (GO:1903428)	0.0267524	0.660657	10	EDN1	IFNG	INSR	RAB27A	CD36	TLR6	AGTR2	PTGS2	PKD2	CLU
negative regulation of stress-activated MAPK cascade (GO:0032873)	0.0267524	0.660657	10	DUSP3	TAOK3	MYC	DUSP19	PTPN22	AIDA	ZNF675	FOXO1	FKTN	DACT1
positive regulation of cell migration (GO:0030335)	0.0261139	0.660657	49	DOCK5	CYR61	MYLK	NIPBL	ZNF609	GLIPR2	CAPN7	FAM110C	CPNE3	MADCAM1	ACVR1	EDN1	SEMA6A	F2R	GAB1	ADAM17	IFNG	ANGPTL3	RAPGEF2	ITGA6	ROR2	SEMA3C	PDGFB	SEMA3E	HIF1A	EGFR	PPM1F	PDGFC	GCNT2	HAS2	ZNF304	RREB1	CLASP2	SEMA4A	TGFB2	HSPA5	INSR	SEMA4C	RDX	SEMA4F	SOD2	FER	APC	SNAI1	CNTN1	FGFR1OP
negative regulation of cell proliferation (GO:0008285)	0.0255299	0.660657	76	APP	TENM1	TES	BTG1	ATP8A2	TNFAIP3	PKD2	ING5	MYC	WDR6	CYP1B1	CD33	MYOG	KLF10	KLF11	PBRM1	F2R	TSC1	SOX11	PEX2	PROX1	SSTR2	MTSS1	NME1	KAT2B	SFRP2	TFDP1	IFNG	NOV	ALDH1A2	COL4A3	RAPGEF2	ANG	IRF6	ROR2	KANK2	HPN	PLG	PPM1D	DLL1	PBLD	ACVR1C	RBBP4	FRZB	POLR2D	SMYD2
heart development (GO:0007507)	0.0255083	0.660657	35	BMP10	PDGFB	PKD2	AKAP13	GJA1	NIPBL	SGCD	SCUBE1	ERBB3	FLRT2	FLRT3	POLR2D	EPHB4	MEF2A	TGFB2	MKKS	CXADR	INSR	MICAL2	CACYBP	FOXL1	BMP5	TGFBR2	BMP4	KAT2B	DLC1	APLNR	NF1	RBM20	ALPK3	TEK	TDGF1	FGF12	DAND5	FBN1
protein deubiquitination (GO:0016579)	0.0252094	0.660657	56	OTUD4	WDR48	USP31	KDM1B	USP32	OTUD7B	TNFAIP3	UBE2D1	BRCA1	MYSM1	YY1	OTUD6B	MYC	PSMD1	MAP3K7	USP46	USP8	USP48	USP49	USP6	USP44	USP45	ACTR8	UCHL3	UCHL5	KAT2B	RNF128	TRAF6	STAMBP	BIRC2	BIRC3	USP13	PSMD10	USP15	INO80D	USP16	HIF1A	RHOT1	TNKS2	RIPK1	BARD1	USP24	SMAD2	USP25	IL33	MBD5
RNA transport (GO:0050658)	0.0255112	0.660657	21	RBFOX1	RANBP3	RBM8A	NCBP2	SRSF1	THOC2	MAGOHB	TGFBR2	NPAP1	ZFP36	KIF5C	ZC3H11A	SARNP	TPR	SRSF2	SRSF3	SRSF5	HNRNPA1	RAE1	EIF4E	SLU7
actin cytoskeleton reorganization (GO:0031532)	0.0250184	0.660657	17	CXADR	GPR65	GAB1	RHOH	NEDD9	PARVA	CDC42BPB	CDC42BPA	ATP2C1	ANTXR1	MKLN1	FER	SIPA1L1	S1PR1	TNIK	S1PR2	FGF10
positive regulation of protein insertion into mitochondrial membrane involved in apoptotic signaling pathway (GO:1900740)	0.0267524	0.660657	10	PPP3R1	BCL2L11	TFDP1	TFDP2	BCL2	TP53BP2	DYNLL2	YWHAZ	YWHAG	TP63
positive regulation of cell development (GO:0010720)	0.025077	0.660657	11	MYOG	BMP4	BMP10	EDN1	BHLHB9	SEMA3C	LIG4	AKAP6	SOX11	PROX1	TRIM32
protein targeting to membrane (GO:0006612)	0.0250184	0.660657	17	RTP4	ATG3	SRP19	TRAM1	PRKCI	PEX19	ZDHHC20	RAB3IP	CHM	ZDHHC21	ZDHHC2	ZDHHC14	ZDHHC15	RABGEF1	PEX3	SSR1	SEC62
positive regulation of nervous system development (GO:0051962)	0.0258842	0.660657	15	NLGN1	GRID2	BHLHB9	NLGN2	CLSTN2	BDNF	NRXN1	CLSTN1	LIG4	SOX11	DICER1	IL1RAPL1	TRIM32	EPHB1	EPHB3
negative regulation of MAP kinase activity (GO:0043407)	0.0250184	0.660657	17	DUSP2	DUSP3	PAQR3	SPRY4	DUSP19	PTPN22	IRAK3	SORL1	HIPK3	RGS4	BMP4	RGS2	NF1	SPRY3	SPRY1	AIDA	ZNF675
RNA splicing, via transesterification reactions with bulged adenosine as nucleophile (GO:0000377)	0.0249901	0.660657	52	DBR1	PPWD1	HNRNPR	ELAVL2	SYNCRIP	METTL14	SART3	SNRPD1	SNRPD3	TXNL4A	BCAS2	USP49	NCBP2	PRPF40A	PRPF4B	PLRG1	ZCRB1	WBP11	GTF2F2	SFPQ	SRSF2	SNRNP27	SRSF3	SNRPE	PABPC1	SRSF5	SLU7	RBM22	SF3B3	RBM8A	CSTF2	SRSF1	CSTF2T	RNPC3	TRA2B	POLR2D	POLR2F	SNRPB2	HNRNPA1	SF3B1	SRSF10	HNRNPA0	PPIL1	CPSF7	PRPF38A	FUS
regulation of ERK1 and ERK2 cascade (GO:0070372)	0.0260399	0.660657	54	DDR1	APP	CCL4L1	HTR2C	PTPN22	HMGB1	FGF2	CYR61	CTGF	DSTYK	RPS6KA6	BMPER	GLIPR2	CCR7	CD36	EPHB1	ROS1	EPHB4	EPHB3	DUSP3	EPHA6	MUSK	FGG	F2R	TIRAP	CNKSR3	RAPGEF2	ROR1	ROR2	MET	CD44	NOTCH2	CCL13	ALOX15	C5AR1	PDGFB	FPR2	EGFR	PKHD1	ERBB3	PDGFC	P2RY1	GCNT2	C3ORF33	ANGPT1	CCL20
vascular smooth muscle contraction (GO:0014829)	0.0319154	0.663391	4	EDNRA	EDN1	PIK3C2A	SLC8A1
pericardium morphogenesis (GO:0003344)	0.0319154	0.663391	4	FLRT3	TBX20	LRP6	BMP5
bleb assembly (GO:0032060)	0.0319154	0.663391	4	P2RX7	EMP1	ANO6	MYLK
regulation of response to biotic stimulus (GO:0002831)	0.0319154	0.663391	4	SCARB2	TRIM5	ELMOD2	FOXP1
sequestering of extracellular ligand from receptor (GO:0035581)	0.0319154	0.663391	4	CD46	LTBP1	DAND5	FBN1
protein localization to basolateral plasma membrane (GO:1903361)	0.0319154	0.663391	4	RAB10	PDZD11	LIN7A	LIN7C
protein deglutamylation (GO:0035608)	0.0319154	0.663391	4	AGBL5	AGBL4	FOLH1	AGTPBP1
positive regulation of carbohydrate metabolic process (GO:0045913)	0.0297732	0.663391	7	P2RX7	PRKAA1	PRKAA2	ENTPD5	INSR	PDGFB	HIF1A
miRNA loading onto RISC involved in gene silencing by miRNA (GO:0035280)	0.0319154	0.663391	4	AGO3	AGO1	DICER1	TARBP2
smooth muscle cell migration (GO:0014909)	0.0319154	0.663391	4	DDR1	NOV	ITGB3	PARVA
cell surface receptor signaling pathway involved in heart development (GO:0061311)	0.0288946	0.663391	6	ACVR1	NOTCH2	BMP4	HEY1	SNAI1	BMPR1A
regulation of Wnt signaling pathway, planar cell polarity pathway (GO:2000095)	0.0319154	0.663391	4	NPHP3	RSPO3	MLLT3	DACT1
inhibition of cysteine-type endopeptidase activity involved in apoptotic process (GO:1990001)	0.0380644	0.663391	5	XIAP	BIRC5	BIRC2	NAIP	BIRC3
negative regulation of necrotic cell death (GO:0060547)	0.0319154	0.663391	4	SLC25A4	YBX3	BIRC2	BIRC3
pore complex assembly (GO:0046931)	0.0288946	0.663391	6	P2RX7	NUP93	AHCTF1	NUP205	TMEM33	ANO6
smooth muscle contraction (GO:0006939)	0.0288946	0.663391	6	EDNRA	ROCK2	BDKRB2	PIK3C2A	SLC8A1	MYLK
intrinsic apoptotic signaling pathway in response to oxidative stress (GO:0008631)	0.0380644	0.663391	5	STK24	CYP1B1	GSKIP	MAP3K5	PDK1
synaptic transmission, GABAergic (GO:0051932)	0.0380644	0.663391	5	GABRA2	GABRB2	GABRA1	GABRA4	GABRA3
cellular response to prostaglandin stimulus (GO:0071379)	0.0380644	0.663391	5	PTGER4	PTGFR	GNG2	TNFSF4	AKR1C2
ribonucleoside monophosphate biosynthetic process (GO:0009156)	0.0288946	0.663391	6	ADSL	ATIC	RFK	GMPS	PAICS	GART
relaxation of muscle (GO:0090075)	0.0380644	0.663391	5	RGS2	PLN	ATP1A2	KCNJ2	SLC8A1
negative regulation of adherens junction organization (GO:1903392)	0.0397919	0.663391	6	RCC2	DLC1	RDX	PHLDB2	CORO1C	CLASP2
DNA double-strand break processing (GO:0000729)	0.0393126	0.663391	7	BARD1	UBE2N	UBE2V2	RBBP8	SMARCAD1	DNA2	BRCA1
regulation of actin filament depolymerization (GO:0030834)	0.0380644	0.663391	5	SEMA5A	MTPN	LIMA1	PLEKHH2	CFL2
relaxation of cardiac muscle (GO:0055119)	0.0380644	0.663391	5	RGS2	PLN	ATP1A2	KCNJ2	SLC8A1
positive regulation of receptor biosynthetic process (GO:0010870)	0.0380644	0.663391	5	HDAC2	EDN1	HNRNPK	HIF1A	HOXA5
miRNA mediated inhibition of translation (GO:0035278)	0.0380644	0.663391	5	TNRC6C	ZFP36	AGO3	AGO1	TNRC6A
purine nucleobase metabolic process (GO:0006144)	0.0380644	0.663391	5	TTR	DPYD	GMPS	HPRT1	PAICS
anion transmembrane transport (GO:0098656)	0.0297732	0.663391	7	SLC25A16	SLC13A1	SLC35A3	SLC35B4	LRRC8C	LRRC8D	LRRC8B
positive regulation of coenzyme metabolic process (GO:0051197)	0.0397919	0.663391	6	P2RX7	PRKAA1	PRKAA2	ENTPD5	INSR	HIF1A
glucose transport (GO:0015758)	0.0293657	0.663391	8	SLC2A9	EDNRA	SLC2A10	SLC2A13	SLC2A12	SLC2A3	SLC5A1	PPBP
negative regulation of lymphocyte activation (GO:0051250)	0.0393126	0.663391	7	DUSP3	TNFAIP3	PTPN22	SOX11	VTCN1	SAMSN1	PAG1
positive regulation of bone mineralization (GO:0030501)	0.0331979	0.663391	10	P2RX7	ACVR1	BMP4	TFAP2A	ANO6	ACVR2A	GPM6B	SLC8A1	LTF	BMPR1A
regulation of mRNA polyadenylation (GO:1900363)	0.0380644	0.663391	5	RNF20	NUDT21	CCNT1	CPEB3	ZC3H14
protein heterotetramerization (GO:0051290)	0.0393126	0.663391	7	NUDT21	CPSF7	CPSF6	INSR	GRIN2B	CBR4	FARSB
regulation of cyclin-dependent protein serine/threonine kinase activity involved in G1/S transition of mitotic cell cycle (GO:0031657)	0.0288946	0.663391	6	ADAM17	CDK6	RGCC	PKD2	EGFR	FGF10
cellular response to amino acid starvation (GO:0034198)	0.028369	0.663391	12	SH3GLB1	DAP	IMPACT	WDR59	RRAGD	MAPK1	EIF2AK2	FAS	PRKD1	RNF152	C12ORF66	MAP3K5
atrioventricular valve morphogenesis (GO:0003181)	0.0397919	0.663391	6	ACVR1	HEYL	TGFB2	HEY1	TGFBR2	BMPR1A
activin receptor signaling pathway (GO:0032924)	0.0393126	0.663391	7	ACVR1	SMAD2	BMP10	ACVR1C	INHBA	TDGF1	ACVR2A
endocardial cushion development (GO:0003197)	0.0393126	0.663391	7	ACVR1	BMP4	HEYL	TGFB2	HEY1	TBX20	BMPR1A
positive regulation of glycolytic process (GO:0045821)	0.0397919	0.663391	6	P2RX7	PRKAA1	PRKAA2	ENTPD5	INSR	HIF1A
posttranscriptional gene silencing by RNA (GO:0035194)	0.0297732	0.663391	7	TNRC6C	CNOT6	CNOT7	AGO3	AGO1	TNRC6A	TNRC6B
positive regulation of epithelial to mesenchymal transition (GO:0010718)	0.0341368	0.663391	12	ACVR1	SMAD2	TGFB2	RGCC	GLIPR2	BAMBI	SNAI1	GCNT2	TWIST1	ALX1	TGFBR2	LOXL2
gamma-aminobutyric acid signaling pathway (GO:0007214)	0.0393126	0.663391	7	GABRA2	GABRB3	GABRB2	GABRA1	GABRB1	GABRA4	GABRA3
positive regulation of mRNA catabolic process (GO:0061014)	0.0377168	0.663391	8	TNRC6C	ZFP36	CNOT7	RC3H1	PABPC1	CPEB3	ZFP36L2	TNRC6B
regulation of myotube differentiation (GO:0010830)	0.0393126	0.663391	7	MYOG	NOV	BDNF	BHLHE41	SMYD1	SIK1	MAPK14
nuclear pore organization (GO:0006999)	0.0397919	0.663391	6	NUP93	AHCTF1	NUP205	TMEM33	TPR	NUP35
positive regulation of ATP metabolic process (GO:1903580)	0.0377168	0.663391	8	P2RX7	PRKAA1	PID1	PRKAA2	ENTPD5	INSR	PPARGC1A	HIF1A
positive regulation of peptidyl-lysine acetylation (GO:2000758)	0.0397919	0.663391	6	RPS6KA5	PAXIP1	TADA2A	BRCA1	BRD7	PPARGC1A
gene silencing by miRNA (GO:0035195)	0.0331979	0.663391	10	TNRC6C	ZFP36	CNOT6	CNOT7	AGO3	AGO1	DICER1	TNRC6A	TARBP2	PUM2
negative regulation of axon extension involved in axon guidance (GO:0048843)	0.0397919	0.663391	6	SEMA5A	SEMA4A	SEMA3C	SEMA4C	SEMA3E	SEMA4F
cellular metal ion homeostasis (GO:0006875)	0.0305435	0.663391	24	SLC24A2	CCL13	CD40	CALCB	EPHX2	ATP2B4	SLC41A1	ATP2A2	HTR2C	ATP1B4	NEDD4L	ATP2B2	ATP1A2	ATP2B1	ATP2C1	ATOX1	SLC8A1	TMEM165	CHERP	TRDN	PKHD1	STIM2	ATP13A3	KCNJ2
chloride transmembrane transport (GO:1902476)	0.0275873	0.663391	16	GABRA2	GABRB3	GABRB2	GABRA1	CLIC5	GABRB1	GABRA4	SLC12A1	GABRA3	SLC1A1	ANO6	CLCN3	CLCN5	CLCN4	SLC26A7	SLC26A9
glutamate receptor signaling pathway (GO:0007215)	0.0373094	0.663391	11	GRIA2	APP	GRID2	GRIN2A	DAGLA	KCNB1	HOMER2	GNAQ	GRIN2B	GRM1	CPEB4
negative regulation of JUN kinase activity (GO:0043508)	0.0380644	0.663391	5	DUSP19	PTPN22	AIDA	ZNF675	HIPK3
positive regulation of phosphorylation (GO:0042327)	0.0317092	0.663391	46	DDR1	APP	CD40	PRKAA1	PRKAA2	ROCK2	ITGB3	ITLN1	PSEN1	FPR2	HIF1A	CYR61	EGFR	CAMKK2	DSTYK	ERBB3	P2RY1	RIPK1	EPHB1	ROS1	EPHB4	EPHB3	EPHA6	MUSK	RYK	ENTPD5	INSR	AKTIP	PIFO	PLAUR	F2	ACVR2A	P2RX7	BMP4	ADAM17	IFNG	FAS	ITGA6	ROR1	KRAS	ANG	TNIK	TEK	ROR2	WDFY2	MET
protein heterooligomerization (GO:0051291)	0.0335309	0.663391	14	CPSF7	CPSF6	KCNC2	INSR	IKZF1	GRIN2B	CLDN1	NUDT21	SCUBE3	TRPS1	RIPK1	TMCC1	CBR4	FARSB
positive regulation of JUN kinase activity (GO:0043507)	0.0392757	0.663391	14	MAP3K2	EDN1	DUSP19	TAOK3	MDFIC	TRAF6	TAOK1	RIPK1	TNIK	TLR6	MAP3K9	MAP3K7	ARHGEF5	MAP3K5
blood circulation (GO:0008015)	0.0392757	0.663391	14	HCN4	NPY1R	AVPR1A	TRDN	CXCL10	RCAN1	GCLC	PLN	SGCD	COL4A3	BDKRB2	OLR1	HOXB2	GCLM
positive regulation of macroautophagy (GO:0016239)	0.0311694	0.663391	13	SH3GLB1	BNIP3L	SCOC	PRKAA2	BNIP3	GNAI3	FYCO1	TBK1	RAB3GAP2	SMCR8	MAP3K7	OPTN	PAFAH1B2
regulation of cell morphogenesis involved in differentiation (GO:0010769)	0.0373094	0.663391	11	SIPA1L1	SDC2	CHN1	HECW1	NEDD4L	TNIK	LRRC4C	SSH2	CORO1C	SSH1	EPHB3
positive regulation of ERK1 and ERK2 cascade (GO:0070374)	0.0275789	0.663391	45	NOTCH2	DDR1	APP	CCL13	CCL4L1	ALOX15	C5AR1	PDGFB	HTR2C	PTPN22	HMGB1	FPR2	FGF2	EGFR	CTGF	DSTYK	BMPER	ERBB3	GLIPR2	PDGFC	P2RY1	GCNT2	CCR7	CD36	EPHB1	ROS1	EPHB4	EPHB3	EPHA6	MUSK	ANGPT1	CCL20	RYK	INSR	FGG	F2R	TIRAP	RAPGEF2	ACKR3	ROR1	TEK	ROR2	MET	CD44	FGF10
neuron migration (GO:0001764)	0.0341368	0.663391	12	NR4A2	TUBB2B	DNER	DCX	RAPGEF2	NRCAM	DISC1	FGF13	PEX13	PHOX2B	MARK1	PAFAH1B1
mRNA splicing, via spliceosome (GO:0000398)	0.0331017	0.663391	56	DBR1	PPWD1	HNRNPR	ELAVL2	SYNCRIP	METTL14	SART3	SNRPD1	SNRPD3	TXNL4A	BCAS2	DDX17	USP49	NCBP2	SCAF11	PRPF40A	PRPF4B	PLRG1	ZCRB1	WBP11	GTF2F2	WDR77	SFPQ	SRSF2	SNRNP27	SRSF3	SNRPE	PABPC1	SRSF5	SLU7	RBM22	SF3B3	RBM8A	CSTF2	SRSF1	CSTF2T	RNPC3	TRA2B	POLR2D	POLR2F	SNRPB2	HNRNPA1	SF3B1	SRSF10	HNRNPA0	PPIL1
positive regulation of viral genome replication (GO:0045070)	0.0331979	0.663391	10	TOP2A	NR5A2	CNOT7	PDE12	NUCKS1	PABPC1	IFIT1	PPIA	TARBP2	SRPK1
regulation of cAMP-mediated signaling (GO:0043949)	0.0297732	0.663391	7	CXCL10	PEX5L	PDE3B	APLNR	RAPGEF2	GPR61	GNAI1
pattern recognition receptor signaling pathway (GO:0002221)	0.0284187	0.663391	14	FGG	CD180	IRAK3	HMGB1	IRAK4	CTSS	HSP90B1	RPS6KA3	TRAF6	TLR8	CD36	TLR6	TLR3	MYD88
mRNA metabolic process (GO:0016071)	0.034183	0.663391	24	SRRM4	SF3B3	CPSF6	NCBP2	SCAF11	SRSF1	SUPT4H1	HNRNPR	HIPK3	ZFP36L2	NUDT21	SFPQ	ZFP36	LSM11	PCBP3	AGO3	SRSF2	AGGF1	SNRPE	SNRPD3	SRSF5	PPARGC1A	DCP2	HNRNPA0
protein sumoylation (GO:0016925)	0.0346985	0.663391	18	TOP2A	NUP205	EYA1	PIAS2	PIAS1	SENP1	NUP93	KIAA1586	SUMO3	TPR	SP3	NFATC2IP	NUP35	UBA2	BIRC5	NUP43	RAE1	NUP37
negative regulation of translation, ncRNA-mediated (GO:0040033)	0.0380644	0.663391	5	TNRC6C	ZFP36	AGO3	AGO1	TNRC6A
protein localization to Golgi apparatus (GO:0034067)	0.0377168	0.663391	8	VPS13C	PAQR3	ARL1	RAB6A	SORL1	OPTN	BICD2	RAB33B
regulation of bone mineralization (GO:0030500)	0.0392757	0.663391	14	ACVR1	TFAP2A	TWIST1	ANO6	ACVR2A	SLC8A1	P2RX7	BMP4	ANKH	S1PR1	BMP2K	ENPP1	GPM6B	BMPR1A
DNA-templated transcription, elongation (GO:0006354)	0.0383509	0.663391	26	GTF2A1	GTF2A2	SETD2	CCNT2	CCNT1	SUPT4H1	RTF1	MLLT3	AFF4	IWS1	TAF1D	TAF1B	TWISTNB	POLR2D	TAF1A	POLR2F	PBRM1	TAF15	NCBP2	ELP2	ELP4	GTF2F2	GTF2H5	POLR1B	TAF4B	TAF3
Wnt signaling pathway, calcium modulating pathway (GO:0007223)	0.0373094	0.663391	11	TNRC6C	PPP3R1	FZD3	GNG2	FZD5	AGO3	AGO1	CALM1	MAP3K7	TNRC6A	TNRC6B
I-kappaB kinase/NF-kappaB signaling (GO:0007249)	0.0275873	0.663391	16	TICAM2	ROCK2	IRAK1BP1	TBK1	TRAF6	TIAF1	REL	TAB3	TLR8	RIPK1	TAB1	MAP3K7	ZNF675	TLR3	BIRC2	BIRC3
positive regulation of intracellular signal transduction (GO:1902533)	0.0297934	0.663391	97	SEMA5A	APP	GOLT1B	IFIT5	GPR61	FGF2	GJA1	TBK1	FGF9	FAM110C	MAP3K7	EPHB1	ROS1	EPHB4	TRIM22	EPHB3	EPHA6	TICAM2	F2R	FRS2	SOX11	RRAGD	ROR1	IAPP	PRKD1	ROR2	ANKRD17	LPAR1	PDGFB	MTDH	BCL2L11	DHX33	UBD	PDGFC	SLC38A9	RIPK1	OSBPL8	TGFB2	WDR59	TSLP	CAV2	INSR	EIF2AK2	ESR1	PUM2	CXCL10
regulation of anatomical structure morphogenesis (GO:0022603)	0.0328512	0.663391	20	PID1	RC3H1	TNFAIP3	CXCL13	TSPAN12	LARP4	FGF2	DLL1	2019-03-05	AKAP13	STRIP1	ZMYM2	HEY1	ZMYM4	NF1	PHIP	KIAA1958	PHLDB2	PDZD8	PROK1	CLASP2
negative regulation of kinase activity (GO:0033673)	0.0301401	0.663391	23	DUSP19	LRRC4	LRRC66	PPM1E	ASPN	TARBP2	PPM1F	LRP6	PREX2	PRDX3	DEPTOR	UBASH3B	FLRT2	FLRT3	LRRTM4	GNAQ	NF1	FGFR1OP	SMCR8	TRIM27	LRRC4C	YWHAG	SOCS4
vesicle-mediated transport in synapse (GO:0099003)	0.0373094	0.663391	11	UNC13B	UNC13C	NLGN1	SYT2	NLGN2	OPHN1	KIF5C	KIF5B	C2CD4A	RAB27A	STON2
neurogenesis (GO:0022008)	0.0392757	0.663391	14	TGFB2	DAGLA	BCL11B	RYK	SIX1	THOC2	ABTB2	METTL14	CDK6	SIX4	KIF3A	COPS2	HAP1	EPHB1
phosphatidylinositol metabolic process (GO:0046488)	0.0346511	0.663391	27	CDS1	SMG1	PGAP1	C2ORF66	MTMR8	MTMR9	PIK3CB	PIK3C2A	FGF2	PIK3CG	MTMR7	INPP5E	PLA2G12A	PLA2G2D	RAB4A	PLA2G4D	SACM1L	SYNJ2	PTPN13	FAM126A	INPP4A	PLA2G16	INPP4B	PIKFYVE	PIK3C3	RAB5A	PI4K2A
protein polyubiquitination (GO:0000209)	0.0349241	0.663391	57	RNF19B	TNFAIP3	UBE2D1	UBE3A	UBE3B	BRCA1	TRIM5	PSMD1	TRIM27	BTRC	RNF152	RNF111	SHPRH	WSB1	NHLRC3	UBE2E2	FBXO11	FBXW2	RC3H2	RNF144A	UBE2R2	TRAF6	HECW1	UBE2V2	ANAPC1	BIRC2	PSMD10	NEDD4L	FBXO40	C18ORF25	RNF213	TNKS2	HECTD2	RNF217	LONRF3	RFFL	LONRF2	BARD1	RNF20	UBE2H	RNF24	SYVN1	LNPEP	UBE2A	UBE2G2	2019-03-06
positive regulation of protein ubiquitination (GO:0031398)	0.0370637	0.663391	21	ARRDC4	PSMD10	PAXIP1	DCUN1D5	ANGPT1	DCUN1D3	PHF23	ARRDC3	DCUN1D1	XIAP	UBE2D1	UBE3A	BRCA1	RCHY1	CLU	TRAF6	UBE2N	UBQLN1	SPRTN	BIRC2	BIRC3
regulation of epithelial to mesenchymal transition (GO:0010717)	0.0346985	0.663391	18	SMAD2	TGFB2	HPN	TWIST1	LDLRAD4	BMP5	TGFBR2	PBLD	LOXL2	SFRP2	RGCC	GLIPR2	BAMBI	SNAI1	GCNT2	ALX1	PHLDB2	CLASP2
negative regulation of cell communication (GO:0010648)	0.0364446	0.663391	20	ACVR1	BRAP	DDR1	EPHA6	MUSK	RYK	HHIP	INSR	OSM	EGFR	UBASH3B	ERBB3	ROR1	TEK	ROR2	MET	EPHB1	ROS1	EPHB4	EPHB3
negative regulation of response to stimulus (GO:0048585)	0.0345226	0.663391	30	DDR1	MCTP1	HHIP	TWIST1	CLU	EGFR	UBASH3B	ERBB3	AKT3	ZKSCAN3	EPHB1	ROS1	EPHB4	EPHB3	ACVR1	BRAP	TGFB2	EPHA6	MUSK	RYK	INSR	VPS13C	HMGA2	ESR1	RBL1	CDK6	ROR1	TEK	ROR2	MET
RNA processing (GO:0006396)	0.0331106	0.663391	43	PIWIL2	ZCCHC11	SF3B3	NUFIP1	SRSF1	SUPT4H1	HNRNPR	RNPC3	BICD1	DCAF4	SYNCRIP	ATXN1	DHX33	SNRPD1	DHX36	DROSHA	SNRPD3	PPARGC1A	BCAS2	HNRNPA0	IVNS1ABP	DDX17	SRRM4	CPSF6	NCBP2	SCAF11	PRPF4B	DICER1	ZCRB1	MAGOHB	SRPK1	SMU1	NUDT21	SFPQ	DDX19B	HNRNPK	NOVA1	SRSF2	AGGF1	PPIG	SRSF5	TARDBP	SLU7
positive regulation of transferase activity (GO:0051347)	0.0341994	0.663391	32	DDR1	PARM1	DCUN1D5	DCUN1D3	DCUN1D1	EGFR	EPM2AIP1	DSTYK	HMBOX1	ERBB3	MYC	MAPK1	EPHB1	ROS1	EPHB4	EPHB3	ARRDC4	EPHA6	MUSK	RYK	INSR	NEK7	ARRDC3	PIFO	SORL1	GRHL2	UBE2N	ROR1	SERINC1	TEK	ROR2	MET
regulation of cytosolic calcium ion concentration (GO:0051480)	0.0341994	0.663391	32	PTGER4	PTGFR	C5AR2	C5AR1	LPAR1	CXCR4	FPR3	HMGB1	FPR2	CXCL13	SLC8A1	EDNRA	CYSLTR1	PLN	P2RY1	BDKRB2	CCR7	CD36	CCR4	EDN1	TRPC3	TRPC4	TRPC1	F2R	ATP2B4	ATP2B2	ATP2B1	F2	ESR1	OR5T1	NMUR2	IAPP
regulation of vesicle-mediated transport (GO:0060627)	0.0374675	0.663391	32	RAB3B	GOSR1	STON1	STON2	RAB40A	OPHN1	TBC1D30	MAPK1	STXBP5	CD177	TBC1D8B	NSF	RABGAP1L	RAB4A	SLC30A8	USP6	TBC1D9	DNAJC13	TBC1D2B	RAB33B	STXBP5L	RAB10	TBCK	TBC1D1	RAB37	TBC1D5	RUFY2	BMP2K	AAK1	HAP1	RAB5A	LLGL1
substrate adhesion-dependent cell spreading (GO:0034446)	0.0406548	0.664007	10	FER	PEAK1	ITGB3	KIF14	ITGAV	PARVA	TEK	SRGAP2	ANTXR1	EPHB3
regulation of stress-activated MAPK cascade (GO:0032872)	0.0406916	0.664007	12	TGFB2	PHLPP1	TAOK3	TAOK1	MYC	SEMA4C	MAPK1	EIF2AK2	FAS	EPHB1	FOXO1	EGFR
negative regulation of receptor activity (GO:2000272)	0.0406548	0.664007	10	HEYL	CRHBP	CLEC12B	CALM3	PKD2	CBL	CALM1	SOCS4	TRDN	SNX6
calcium-dependent cell-cell adhesion via plasma membrane cell adhesion molecules (GO:0016339)	0.0406916	0.664007	12	NLGN1	CDH11	PCDHB16	PCDHB5	DSG1	PCDHB4	PCDHB3	ATP2C1	CDH8	CDH18	CDH7	CDH19
spliceosomal complex assembly (GO:0000245)	0.0406916	0.664007	12	SART3	YTHDC1	SNRPD1	SCAF11	SRSF1	SNRPE	SNRPD3	SRSF5	TXNL4A	SF3B1	SRSF10	SRPK1
regulation of nitric oxide biosynthetic process (GO:0045428)	0.0406548	0.664007	10	EDN1	IFNG	INSR	ATP2B4	CD36	TLR6	AGTR2	PTGS2	PKD2	CLU
negative regulation of transforming growth factor beta receptor signaling pathway (GO:0030512)	0.0411839	0.669673	15	SMAD2	LDLRAD4	LTBP1	ASPN	TGFBR2	PBLD	PPM1A	EID2	ADAM17	BAMBI	SNX25	CD109	DAND5	FBN1	SNX6
regulation of stress fiber assembly (GO:0051492)	0.0427336	0.692435	16	PTGER4	ROCK2	GPR65	LPAR1	TSC1	PPM1E	PPM1F	CTGF	RGCC	DLC1	WASF2	MET	PHLDB2	ARHGEF5	PFN2	CLASP2
regulation of DNA metabolic process (GO:0051052)	0.0434523	0.699173	13	ANKRD17	SMG1	ESCO1	KDM1B	NUCKS1	ESCO2	HDAC8	GRHL2	MYC	UBE2N	UBE2V2	SMARCAD1	IL7R
intraciliary transport (GO:0042073)	0.0434523	0.699173	13	IFT80	DYNLL2	WDR35	ICK	DYNC2LI1	IFT74	KIF3A	TTC21B	TTC30A	TRIP11	ALPK3	TNPO1	SSX2IP
protein K63-linked deubiquitination (GO:0070536)	0.0441036	0.701734	9	USP13	OTUD4	USP8	USP25	USP16	OTUD7B	TNFAIP3	STAMBP	OTUD1
negative regulation of JNK cascade (GO:0046329)	0.0441036	0.701734	9	DUSP3	TAOK3	DUSP19	PTPN22	AIDA	ZNF675	HIPK3	FKTN	DACT1
positive regulation of multicellular organismal process (GO:0051240)	0.0438971	0.701734	44	DOCK5	NLGN1	BMP10	PAXIP1	TFRC	HPN	PDGFB	TWIST1	HIF1A	PPM1F	LRP6	LOXL2	SNX4	GLIPR2	CAPN7	GCNT2	ALX1	SOX6	PPARGC1A	RREB1	LURAP1	SOX5	CLASP2	ACVR1	SMAD2	GHSR	IL33	TGFB2	SGIP1	NFAM1	EIF2AK2	SOX11	INHBA	TGFBR2	BMP4	RGCC	IFNG	IL23A	BAMBI	TNFSF4	SNAI1	HAP1	FGF10	BMPR1A
peptidyl-serine phosphorylation (GO:0018105)	0.0442193	0.701734	33	SMG1	PRKAA2	ROCK2	PDGFB	TTBK2	CAMKK2	MYLK4	RPS6KA3	MAPK9	TBK1	AKT3	PHKG2	STK38L	PDK3	MAPK1	RIPK1	CAMK2G	CSNK1G3	PRKCI	CAMK1D	MAPK14	HIPK3	DCLK1	UHMK1	TGFBR2	MAPK13	CAMK4	ULK1	SGK3	PRKD1	SGK2	TDGF1	CSNK1G1
positive regulation of toll-like receptor 4 signaling pathway (GO:0034145)	0.0499118	0.712589	4	TICAM2	PTPN22	TIRAP	LTF
phospholipid scrambling (GO:0017121)	0.0499118	0.712589	4	P2RX7	PLSCR1	PLSCR4	ANO6
late endosome to vacuole transport (GO:0045324)	0.0499118	0.712589	4	LEPROT	TMEM50A	LEPROTL1	TMEM50B
cellular biogenic amine catabolic process (GO:0042402)	0.0499118	0.712589	4	DMGDH	SARDH	HNMT	ALDH7A1
basement membrane organization (GO:0071711)	0.0499118	0.712589	4	FLRT2	COL4A1	HPN	CTSS
positive regulation of catenin import into nucleus (GO:0035413)	0.0499118	0.712589	4	SEMA5A	BAMBI	EGFR	DACT1
late endosome to vacuole transport via multivesicular body sorting pathway (GO:0032511)	0.0499118	0.712589	4	LEPROT	TMEM50A	LEPROTL1	TMEM50B
positive regulation of immunoglobulin mediated immune response (GO:0002891)	0.0499118	0.712589	4	PAXIP1	TFRC	TNFSF4	CD226
regulation of DNA methylation (GO:0044030)	0.0499118	0.712589	4	MECP2	KMT2A	KDM1B	GRHL2
histone H2A-K119 monoubiquitination (GO:0036353)	0.0499118	0.712589	4	PCGF5	PCGF3	TRIM37	RNF2
polyol transport (GO:0015791)	0.0499118	0.712589	4	PGAP1	SLC2A13	AQP2	SLC5A3
positive regulation of ryanodine-sensitive calcium-release channel activity (GO:0060316)	0.0499118	0.712589	4	CALM3	AKAP6	CALM1	TRDN
regulation of fibroblast apoptotic process (GO:2000269)	0.0499118	0.712589	4	BCL2L11	BTG1	IER3IP1	TP63
positive regulation of alpha-beta T cell differentiation (GO:0046638)	0.0499118	0.712589	4	TNFSF4	NKAP	GLI3	TGFBR2
phosphatidylinositol-3-phosphate biosynthetic process (GO:0036092)	0.0499118	0.712589	4	PIK3C3	PIK3CB	PIK3C2A	PIK3CG
positive regulation of vascular endothelial growth factor production (GO:0010575)	0.0475199	0.712589	8	CCBE1	CYP1B1	RORA	BRCA1	PTGS2	HIF1A	NOX1	SULF2
regulation of interleukin-12 production (GO:0032655)	0.0491805	0.712589	10	IFNG	IL23A	TNFSF4	IRAK3	CCR7	HMGB1	TLR3	TIRAP	CMKLR1	FOXP1
positive regulation of organelle organization (GO:0010638)	0.0491805	0.712589	10	P2RX7	FYCO1	LMAN1	C2CD5	ATL3	SURF4	RAB3GAP2	LIG4	SMCR8	PPARGC1A
regulation of amyloid fibril formation (GO:1905906)	0.0499118	0.712589	4	APP	IAPP	PSEN1	CLU
activation of MAPKK activity (GO:0000186)	0.0491805	0.712589	10	BMP4	TAOK3	TAOK1	F2R	MAP3K7CL	EIF2AK2	FRS2	TNIK	MAP3K7	MAP3K5
positive regulation of Notch signaling pathway (GO:0045747)	0.0491805	0.712589	10	KAT2B	TGFB2	PRKCI	TSPAN14	MAML2	NOV	BMP2K	AAK1	DLL1	TP63
platelet aggregation (GO:0070527)	0.0491805	0.712589	10	RAP2B	UBASH3B	STXBP3	ITGB3	FGG	GNAS	PIK3CB	METAP1	PIK3CG	VCL
positive regulation of protein homodimerization activity (GO:0090073)	0.0499118	0.712589	4	STPG1	GNL3L	SYAP1	TIRAP
ceramide metabolic process (GO:0006672)	0.0480764	0.712589	12	FUT6	CERS3	CERS4	ASAH1	ASAH2B	SAMD8	ASAH2	CERS6	ORMDL2	ORMDL1	SGMS2	SPTSSA
cellular response to glucose starvation (GO:0042149)	0.0491805	0.712589	10	SH3GLB1	PRKAA1	IMPACT	PRKAA2	HSPA5	PIK3C3	HNRNPA1	RRP8	C12ORF66	CPEB4
positive regulation of protein phosphorylation (GO:0001934)	0.0465844	0.712589	83	DDR1	APP	TENM1	CD40	BMP10	CCNT2	CCNT1	ITGB3	DUSP19	CCNC	HMGB1	CYR61	RPS6KA5	TBK1	TRIM5	CCR7	EPHB1	ROS1	EPHB4	EPHB3	ACVR1	EPHA6	MUSK	AKTIP	FCRL3	F2R	PLAUR	KSR2	F2	ADAM17	SFRP2	IFNG	APLNR	RAPGEF2	ROR1	IAPP	TNIK	PRKD1	ROR2	WDFY2	MET	CD44	PFN2	ROCK2	ITLN1	LPAR1
transmembrane receptor protein tyrosine kinase signaling pathway (GO:0007169)	0.0473287	0.712589	80	DDR1	ITGB3	IRS4	SLA	PIK3CB	IDE	PIK3C2A	FGF2	PTPRG	SIPA1L1	UBASH3B	FGF9	BDKRB2	ITGAV	EPHB1	EPHB4	APPL1	EPHB3	ACTR3	EPHA6	MUSK	NCBP2	GAB1	CYBB	FRS2	GTF2F2	PRLR	MTSS1	ESRP2	ESRP1	RAPGEF2	PHIP	HAP1	PRKD1	SOS1	SHC4	SHC3	ROCK2	SDC2	HPN	PDGFB	NEDD9	PSEN1	CBL	FOXO1	ERBB3
extracellular matrix organization (GO:0030198)	0.0459928	0.712589	49	ITGB1	DDR1	APP	ITGAM	COL14A1	ITGB3	FGF2	CTSS	LOXL2	ADAMTS5	ADAMTS3	TIMP2	CAPN2	TNR	COL10A1	ITGB8	CYP1B1	ITGAV	MADCAM1	EXOC8	FGG	ADAM19	VCAN	COL4A1	COL4A3	ADAM12	COL8A2	MMP19	COL6A3	ITGA6	CD47	CD44	COL11A1	PDGFB	PLG	COL19A1	SCUBE3	SCUBE1	TTR	FLRT2	HAS2	GPM6B	TGFB2	VCAM1	COL5A2	COL9A1
negative regulation of epithelial cell proliferation (GO:0050680)	0.0499954	0.712589	17	TGFB2	CAV2	HPN	ATP5A1	PEX2	GDF5	MTSS1	PBLD	ROBO1	AIMP1	SFRP2	CDK6	RGCC	NFIB	ATOH8	KRIT1	NF1
positive regulation of MAP kinase activity (GO:0043406)	0.0477144	0.712589	39	TENM1	CD40	PRKAA1	C5AR1	DUSP19	PDGFB	MAP3K7CL	CXCR4	PIK3CB	FGF2	EGFR	PIK3CG	ROBO1	PDGFC	MAPK1	S1PR2	MAP3K7	PROK1	MAP3K5	MAP2K6	MAP3K2	EDN1	INSR	F2R	EIF2AK2	FRS2	MAPK14	BMP4	TAOK3	TRAF6	TAOK1	UBE2N	NEK10	TAB3	TLR6	TAB1	TDGF1	ARHGEF5	FGF10
peptidyl-lysine modification (GO:0018205)	0.0465905	0.712589	27	TOP2A	NUP205	METTL21A	NUGGC	LOXL2	SENP6	KIAA1586	SUMO3	TPR	NFATC2IP	NUP43	RAE1	EYA1	ESCO1	SIRT5	PIAS2	PIAS1	SENP1	NUP93	KAT2B	CTH	SP3	NDUFAB1	NUP35	UBA2	BIRC5	NUP37
RNA 3'-end processing (GO:0031123)	0.0488955	0.712589	16	ZCCHC11	CPSF7	RBM8A	NCBP2	CSTF2	SRSF1	CSTF2T	THOC2	MAGOHB	NUDT21	ZC3H11A	SARNP	SRSF2	SRSF3	SRSF5	SLU7
positive regulation of protein localization to membrane (GO:1905477)	0.0470346	0.712589	23	DPP10	ITGB1	PRKCI	C2CD5	ITGAM	KCNB1	ANK3	MFF	DYNLL2	YWHAZ	EGFR	PPP3R1	BCL2L11	TFDP1	TFDP2	IFNG	KIF5B	WNK3	BCL2	AGR2	TP53BP2	YWHAG	TP63
glial cell development (GO:0021782)	0.0506439	0.713029	7	PRDM8	APP	CDK6	NF1	SOX11	DLL1	ZNF488
mesoderm formation (GO:0001707)	0.0506439	0.713029	7	ITGB1	EOMES	SMAD2	ITGB3	TBX20	SNAI1	HMGA2
eye morphogenesis (GO:0048592)	0.0506439	0.713029	7	ALDH1A3	NIPBL	EFEMP1	AGTPBP1	COL5A2	NF1	FBN1
neuromuscular junction development (GO:0007528)	0.0506439	0.713029	7	UNC13B	CACNB2	UNC13C	MUSK	F2R	ANK3	PDZRN3
cellular response to arsenic-containing substance (GO:0071243)	0.0534785	0.715836	5	GSTO2	HNRNPA1	CPEB2	ATF3	MAPK13
regulation of IRE1-mediated unfolded protein response (GO:1903894)	0.0534785	0.715836	5	BCL2L11	HSPA5	TMEM33	AGR2	DNAJB9
cellular glucan metabolic process (GO:0006073)	0.0534785	0.715836	5	UGP2	PPP1R3C	GBE1	PHKG2	PHKB
neuron apoptotic process (GO:0051402)	0.0529713	0.715836	6	APP	ERBB3	BNIP3	BCL2	LIG4	SDIM1
miRNA metabolic process (GO:0010586)	0.0529713	0.715836	6	DDX17	ZCCHC11	BCDIN3D	DROSHA	DICER1	TARBP2
neural tube development (GO:0021915)	0.0529713	0.715836	6	ALDH1A2	SOX11	PROX1	PKD2	GRHL2	DACT1
regulation of cell communication by electrical coupling (GO:0010649)	0.0534785	0.715836	5	CALM3	ANK3	CALM1	SLC8A1	TRDN
purine nucleoside monophosphate biosynthetic process (GO:0009127)	0.0534785	0.715836	5	ADSL	ATIC	GMPS	PAICS	GART
positive regulation of cardiac muscle tissue growth (GO:0055023)	0.0529713	0.715836	6	BMP10	EDN1	TBX20	AKAP6	FGF2	BMPR1A
positive regulation of T cell cytokine production (GO:0002726)	0.0534785	0.715836	5	FZD5	TNFSF4	TRAF6	B2M	MAP3K7
glucose transmembrane transport (GO:1904659)	0.0529713	0.715836	6	SLC2A9	EDNRA	SLC2A10	SLC2A3	SLC5A1	PPBP
positive regulation of cardiac muscle hypertrophy (GO:0010613)	0.0529713	0.715836	6	MEF2A	MTPN	BMP10	EDN1	TRPC3	AKAP6
regulation of vascular endothelial cell proliferation (GO:1905562)	0.0534785	0.715836	5	ADAM17	SP1	AKT3	HMGB1	FGF2
regulation of antigen receptor-mediated signaling pathway (GO:0050854)	0.0534785	0.715836	5	ELF1	RC3H1	PTPN22	PAX5	RUNX1
cellular divalent inorganic cation homeostasis (GO:0072503)	0.0520348	0.715836	24	SLC24A2	CCL13	CD40	SLC30A9	CALCB	SLC30A8	SLC30A5	EPHX2	ATP2B4	SLC41A1	ATP2A2	HTR2C	ATP2B2	ATP2B1	ATP2C1	SLC39A14	TMEM165	CHERP	TRDN	PKHD1	MT1A	STIM2	SLC39A6	ATP13A3
positive regulation of sequence-specific DNA binding transcription factor activity (GO:0051091)	0.0520566	0.715836	46	MTPN	APP	CD40	GTF2A2	BEX1	TRIM52	CLU	LRP6	MTDH	PRDX3	RPS6KA5	DHX33	ZIC2	TRIM5	RIPK1	CD36	TRIM27	MAP3K7	PPARGC1A	TRIM22	PRKCI	EDN1	CAMK1D	NFAM1	ARID5B	EIF2AK2	IRAK3	TRAF1	IRAK4	ESR1	TIRAP	FER	RGCC	TRAF6	UBE2N	TAB3	TRIM37	ROR1	TLR6	PRKD1	TRIM38	TAB1	TRIM32	ARHGEF5	MYD88	LTF
positive regulation of cellular catabolic process (GO:0031331)	0.0518199	0.715836	25	PRKAA1	ABCD2	PRKAA2	TWIST1	PIK3CB	HIF1A	FOXO1	MTDH	PHKG2	RNF152	TRIM22	DACT1	SH3GLB1	UQCC2	ENTPD5	BNIP3	INSR	RDX	RC3H1	P2RX7	CNOT7	AADAC	IFNG	PRKD1	OPTN
regulation of myoblast differentiation (GO:0045661)	0.0538973	0.719358	9	MYOG	BMP4	BTG1	SMYD1	SOSTDC1	HIF1AN	MAPK14	DLL1	EID2B
insulin receptor signaling pathway (GO:0008286)	0.0565711	0.752868	17	C2CD5	CAV2	INSR	GAB1	IRS4	IDE	PIK3C2A	FOXO1	FER	APC	PHIP	ZNF106	SOS1	ATP6V1C1	PTPN2	ATP6V1C2	APPL1
positive regulation of exocytosis (GO:0045921)	0.058822	0.774154	10	IFNG	FGG	VPS4A	RAB27A	STXBP5	RAB27B	STAM	RAB5A	CLASP2	EXPH5
heterotypic cell-cell adhesion (GO:0034113)	0.0588411	0.774154	8	ITGB1	CXADR	ITGB3	ITGAV	PARVA	CTNNA3	MADCAM1	CD58
response to alcohol (GO:0097305)	0.0588411	0.774154	8	SMAD2	GRIN2A	GRIN3A	CCR7	CSN1S1	GRIN2B	TGFBR2	ADH6
positive regulation of chemotaxis (GO:0050921)	0.0587647	0.774154	13	SEMA5A	CXCL6	PDGFB	PPBP	CXCL13	CXCL5	PPM1F	CXCL10	ADAM17	TUBB2B	CNTN1	PRKD1	MET
negative regulation of cellular response to transforming growth factor beta stimulus (GO:1903845)	0.0606286	0.790912	14	SMAD2	DLX1	LDLRAD4	ASPN	TGFBR2	PBLD	PPM1A	EID2	ADAM17	BAMBI	SNX25	CD109	DAND5	SNX6
positive regulation of protein import into nucleus (GO:0042307)	0.0606286	0.790912	14	SEMA5A	F2R	PSEN1	F2	EGFR	NUP93	BMP4	IFNG	BAMBI	TPR	ZIC1	DACT1	BMPR1A	RBM22
cellular response to cytokine stimulus (GO:0071345)	0.0606007	0.790912	90	ITGB1	CNTF	PID1	ITGAM	CCL4L1	DOCK8	IL24	LRRC4	IL5RA	RORA	PIK3CB	BRCA1	IFIT1	FGF2	YBX3	SYNCRIP	CRHBP	ZFP36	TBK1	LRRTM4	MYC	DPYSL3	CCR7	CD36	JUNB	IL13RA1	MME	RC3H1	IL16	IRAK3	IRAK4	YWHAZ	ASPN	IL23A	IRF4	PDE12	IFNE	IL1RAPL1	IRF8	BIRC5	SOS1	ZNF675	IFNAR1	CCL13	SELPLG	MAOA
positive regulation of protein serine/threonine kinase activity (GO:0071902)	0.0612926	0.797322	27	PSMD10	TENM1	CD40	CCNT2	CCNT1	SYAP1	PDGFB	CCNC	FGF2	EGFR	PIK3CG	ROBO1	PDGFC	MAP3K7	EDN1	ATP2B4	PROX1	TIRAP	IFNG	TRAF6	NEK10	RAPGEF2	CALM3	TLR6	CALM1	TLR3	LTF
axonogenesis (GO:0007409)	0.0619631	0.803779	47	APP	SHC3	ECM2	SEMA3C	NRXN1	CXCR4	PIK3CB	ROBO1	NRAS	RPS6KA5	OPHN1	KIF5C	KIF3A	SLITRK1	KIF5B	SLITRK3	GRB10	SLITRK6	TNR	MAPK1	SLIT3	NRCAM	EPHB1	EPHB3	SPTBN2	LINGO2	SEMA6A	BDNF	RYK	DCC	GAB1	UNC5C	SEMA4F	FRS2	KERA	GFRA1	ANK3	RAB10	CREB1	DOK5	DOK6	ULK2	ULK1	KRAS	CNTN4	SOS1
regulation of cell proliferation (GO:0042127)	0.0623298	0.806272	141	APP	CNTF	TES	ATP8A2	RTKN2	SLA	CXCL13	FGF2	ZNF609	HMGN5	FGF9	MYC	NAMPT	CYP1B1	JUNB	IER5	PROK1	F2R	TSC1	SOX11	POU3F3	PIAS1	EID2	ADAM17	SFRP2	COL4A3	PHIP	STAMBP	ROR2	PTGFR	PDGFB	PKHD1	PRDX3	PDGFC	SMYD2	SSR1	TNFRSF14	ZBTB7C	TFAP2A	CD164	TGFB2	YES1	TSLP	INSR	TNK1	EIF2AK2
regulation of plasma membrane bounded cell projection assembly (GO:0120032)	0.0626018	0.807528	11	DYNC2LI1	ATG3	FER	MYO10	RDX	CCR7	PLD1	SSH2	RAB5A	SSH1	ATG5
kidney development (GO:0001822)	0.0630322	0.810816	16	TFAP2A	TGFB2	MME	C1GALT1	SIX1	PROX1	SULF2	PKHD1	BMP4	CENPF	NIPBL	NF1	NPHP3	HAS2	KCTD11	FGF10
negative regulation of viral process (GO:0048525)	0.0638342	0.812083	7	CRP	ZFP36	TRIM27	TRIM32	TRIM11	LTF	MBL2
hepaticobiliary system development (GO:0061008)	0.0638342	0.812083	7	NIPBL	NF1	ARID5B	COBL	PROX1	PKD2	MET
energy reserve metabolic process (GO:0006112)	0.0638342	0.812083	7	PID1	UGP2	PPP1R3C	GBE1	MYC	PHKG2	PHKB
ventricular septum morphogenesis (GO:0060412)	0.0638342	0.812083	7	ACVR1	HEYL	TGFB2	HEY1	SOX11	PROX1	TGFBR2
omega-hydroxylase P450 pathway (GO:0097267)	0.0723558	0.814973	4	CYP2C8	CYP2U1	CYP1B1	CYP2C19
long-chain fatty acid biosynthetic process (GO:0042759)	0.0723558	0.814973	4	ASAH2B	ASAH2	ALOX15	ELOVL6
sphingoid biosynthetic process (GO:0046520)	0.0723558	0.814973	4	ASAH2B	ASAH2	SPTLC3	ACER3
postsynaptic density organization (GO:0097106)	0.0723558	0.814973	4	NLGN1	NLGN2	NRXN1	SHANK2
positive regulation of mitochondrial translation (GO:0070131)	0.0723558	0.814973	4	TRMT10C	UQCC2	UQCC1	MPV17L2
oogenesis (GO:0048477)	0.0723558	0.814973	4	PIWIL2	MEI4	C14ORF39	HORMAD1
regulation of striated muscle tissue development (GO:0016202)	0.0723558	0.814973	4	BMP4	MKL2	MTPN	CENPF
regulation of integrin activation (GO:0033623)	0.0723558	0.814973	4	PTGER4	FBLIM1	KIF14	CXCL13
type B pancreatic cell differentiation (GO:0003309)	0.0723558	0.814973	4	BMP4	CDK6	DLL1	BMP5
mesodermal cell differentiation (GO:0048333)	0.0723558	0.814973	4	ITGB1	BMP4	ITGB3	HMGA2
atrial septum development (GO:0003283)	0.0719903	0.814973	5	NOTCH2	TGFB2	TBX20	NPHP3	DAND5
protein modification by small protein conjugation or removal (GO:0070647)	0.0723558	0.814973	4	SENP6	KIAA1586	UBD	KRBOX4
negative regulation of mRNA 3'-end processing (GO:0031441)	0.0723558	0.814973	4	BARD1	RNF20	CCNT1	ZC3H14
small RNA loading onto RISC (GO:0070922)	0.0723558	0.814973	4	AGO3	AGO1	DICER1	TARBP2
manganese ion transport (GO:0006828)	0.0723558	0.814973	4	TRPC3	TRPC4	TRPC1	SLC11A2
regulation of T cell cytokine production (GO:0002724)	0.0719903	0.814973	5	FZD5	TNFSF4	TRAF6	B2M	MAP3K7
RNA interference (GO:0016246)	0.0719903	0.814973	5	TSNAX	DROSHA	DICER1	TSN	TARBP2
regulation of biomineral tissue development (GO:0070167)	0.0719903	0.814973	5	ANKH	S1PR1	BMP2K	ENPP1	TWIST1
positive regulation of calcium ion transmembrane transporter activity (GO:1901021)	0.0684952	0.814973	6	CALM3	AKAP6	HAP1	PKD2	CALM1	TRDN
pathway-restricted SMAD protein phosphorylation (GO:0060389)	0.0719903	0.814973	5	ACVR1	TGFB2	BMP10	USP15	TGFBR2
positive regulation of striated muscle cell differentiation (GO:0051155)	0.0684952	0.814973	6	MYOG	BMP10	EDN1	SMYD1	PROX1	MAPK14
regulation of acetyl-CoA biosynthetic process from pyruvate (GO:0010510)	0.0719903	0.814973	5	PDHX	PDP2	PDK3	PDHB	PDK1
toll-like receptor 9 signaling pathway (GO:0034162)	0.0719903	0.814973	5	TRAF6	TLR8	PIK3C3	IRAK4	MYD88
regulation of acyl-CoA biosynthetic process (GO:0050812)	0.0719903	0.814973	5	PDHX	PDP2	PDK3	PDHB	PDK1
ATP-dependent chromatin remodeling (GO:0043044)	0.0650021	0.814973	9	SMARCE1	CECR2	SMARCC1	HDAC2	PBRM1	RBBP4	ANP32E	SMARCAD1	SPTY2D1
negative regulation of axon guidance (GO:1902668)	0.0684952	0.814973	6	SEMA5A	SEMA4A	SEMA3C	SEMA4C	SEMA3E	SEMA4F
DNA packaging (GO:0006323)	0.0684952	0.814973	6	NIPBL	CHAF1B	RBBP4	AIFM1	KAT6A	ASH1L
positive regulation of osteoblast differentiation (GO:0045669)	0.0696139	0.814973	10	ACVR1	BMP4	SOX11	PRKD1	ACVR2A	CYR61	RUNX2	TP63	LTF	BMPR1A
regulation of microtubule-based process (GO:0032886)	0.0717225	0.814973	8	MAP10	APC	TAOK1	MEMO1	BICD1	PHLDB2	BICD2	CLASP2
regulation of endothelial cell apoptotic process (GO:2000351)	0.0696139	0.814973	10	SEMA5A	CD40	PRKCI	RGCC	ANGPT1	FGG	KRIT1	TNFAIP3	ANO6	TEK
positive regulation of phospholipase C activity (GO:0010863)	0.0650021	0.814973	9	EDNRA	GNAQ	C5AR1	LPAR1	ANG	AVPR1A	FGF2	ESR1	EGFR
response to ketone (GO:1901654)	0.0717225	0.814973	8	YAP1	TGFB2	CATSPER2	ABHD2	UBE3A	SLIT3	CCR7	CSN1S1
negative regulation of lipid localization (GO:1905953)	0.0723558	0.814973	4	CRP	ITGB3	ITGAV	PTPN2
regulation of intracellular estrogen receptor signaling pathway (GO:0033146)	0.0650021	0.814973	9	YAP1	KANK2	UFL1	UBA5	BRCA1	ESR1	KCTD6	ZNF366	RUNX1
cellular response to fibroblast growth factor stimulus (GO:0044344)	0.0704955	0.814973	22	TIA1	NCBP2	FRS2	CBL	FGF2	GTF2F2	ZFP36L2	NR4A1	DSTYK	ZFP36	FLRT2	FGF9	ESRP2	FLRT3	ESRP1	POLR2D	POLR2F	MAPK1	HNRNPA1	TDGF1	CD44	FGF10
negative regulation of chromatin silencing (GO:0031936)	0.0723558	0.814973	4	TET1	ASF1A	AICDA	PHF8
cell morphogenesis involved in differentiation (GO:0000904)	0.0692069	0.814973	14	ITGB3	ACTN1	KIF14	PARVA	PROX1	ANTXR1	GRHL2	FER	OPHN1	PEAK1	ITGAV	TEK	SRGAP2	EPHB3
negative regulation of macromolecule metabolic process (GO:0010605)	0.0659703	0.814973	28	NOTCH2	APP	PDGFB	PTPN22	HIF1A	MECP2	YY1	ITGB8	ANXA7	ZNF148	HAVCR2	MSR1	TGFB2	ZNF281	AP1AR	SOX11	ESR1	RBL1	SFRP2	CNOT7	IFNG	PTRH2	REL	PGR	SMCR8	CD46	TARDBP	OPTN
positive regulation of immune response (GO:0050778)	0.0692069	0.814973	14	TGFB2	ITGAM	PLSCR1	IFNG	IL23A	POLR3D	TNFSF4	POLR3F	TLR8	POLR3G	CCR7	CD226	CD46	CD177
circulatory system development (GO:0072359)	0.0684934	0.814973	25	PDGFB	PKD2	AKAP13	GJA1	NIPBL	ERBB3	FLRT3	POLR2D	MEF2A	TGFB2	MKKS	CXADR	MICAL2	CACYBP	FOXL1	TGFBR2	KAT2B	APLNR	NF1	RBM20	ALPK3	TEK	TDGF1	FGF12	FBN1
serine family amino acid metabolic process (GO:0009069)	0.0684952	0.814973	6	SEPSECS	GCLC	CTH	CDO1	SEPHS2	PSPH
homophilic cell adhesion via plasma membrane adhesion molecules (GO:0007156)	0.071045	0.814973	16	ITGB1	CADM1	SMAGP	CADM2	AMIGO2	PVR	CDH8	CDH7	ROBO1	CDH11	CD226	SDK2	CDH18	CD200	PCDHA7	CDH19
cellular response to decreased oxygen levels (GO:0036294)	0.071045	0.814973	16	BNIP3L	BNIP3	HP1BP3	TWIST1	TSC1	RORA	PTGS2	HIF1A	SDIM1	RGCC	MYC	PGK1	UBQLN1	MDM4	CPEB2	CPEB4
negative regulation of protein kinase activity (GO:0006469)	0.0684934	0.814973	25	DUSP19	LRRC4	PPM1E	PPM1F	CORO1C	LRP6	PREX2	DEPTOR	UBASH3B	FLRT2	FLRT3	LRRTM4	SH3BP5	TRIM27	LRRC4C	YWHAG	SOCS4	LRRC66	SORL1	ASPN	TARBP2	GNAQ	NF1	FGFR1OP	SMCR8
RNA export from nucleus (GO:0006405)	0.066852	0.814973	27	NUP205	SMG1	RBM8A	SRSF1	NPAP1	TPR	NUP43	HNRNPA1	RAE1	EIF4E	SRSF10	RANBP3	NCBP2	TSC1	THOC2	MAGOHB	NUP93	DDX19B	ZC3H11A	SARNP	SRSF2	NUP35	SRSF3	SRSF5	NUP62CL	SLU7	NUP37
mRNA transport (GO:0051028)	0.0692342	0.814973	24	NUP205	SMG1	RBM8A	NCBP2	SRSF1	THOC2	MAGOHB	NUP93	ZFP36	DDX19B	KIF5C	ZC3H11A	SARNP	TPR	SRSF2	NUP35	SRSF3	NUP43	SRSF5	RAE1	EIF4E	SLU7	SRSF10	NUP37
regulation of I-kappaB kinase/NF-kappaB signaling (GO:0043122)	0.0717583	0.814973	43	ANKRD17	CD40	GOLT1B	LPAR1	IFIT5	OTUD7B	TNFAIP3	RORA	ATP2C1	MTDH	AKAP13	GJA1	TBK1	CASP10	TRIM5	UBD	CCR7	RIPK1	MAP3K7	LURAP1	TRIM22	TICAM2	F2R	RHOH	ZDHHC13	IRAK4	ESR1	TIRAP	PPM1A	TRAF6	UBE2N	REL	TRIM59	ROR1	TLR6	PRKD1	TRIM38	TRIM32	OPTN	BIRC2	MYD88	BIRC3	LTF
regulation of viral transcription (GO:0046782)	0.073039	0.820667	11	ZFP36	MDFIC	CCNT1	POLR2D	SUPT4H1	POLR2F	TRIM27	TRIM32	GTF2F2	TRIM11	TARBP2
protein complex subunit organization (GO:0071822)	0.0755449	0.846763	12	TGFB2	NUP205	ADAMTS3	COL14A1	COL11A1	COL5A2	NUF2	TPR	NF1	NUP35	CYP1B1	LOXL2
organelle transport along microtubule (GO:0072384)	0.0774472	0.865983	9	RAB1A	RHOT1	KIF5B	HAP1	RAB6A	BICD1	BICD2	LRPPRC	PAFAH1B1
cytoskeleton organization (GO:0007010)	0.0777362	0.867115	28	CCL13	RTKN2	RHOBTB3	NEDD9	CECR2	ZMYM2	PCLO	ZMYM4	FLNB	PDZD8	WASF3	MARK1	PRKCI	SEMA6A	DST	MICAL2	PRPF40A	ANK3	CDC42BPB	LARP4	FMNL3	ANLN	ABI2	PHIP	TNIK	BRWD1	KIAA1958	BRWD3
regulation of calcium ion import (GO:0090279)	0.0789141	0.867182	7	PLN	FCRL3	WNK3	PDGFB	TRIM27	EPPIN	PKD2
outflow tract septum morphogenesis (GO:0003148)	0.0789141	0.867182	7	BMP4	TGFB2	SEMA3C	TBX20	PARVA	TGFBR2	BMPR1A
activation of phospholipase C activity (GO:0007202)	0.0789141	0.867182	7	EDNRA	GNAQ	C5AR1	LPAR1	ANG	AVPR1A	EGFR
calcium-mediated signaling (GO:0019722)	0.0798078	0.867182	17	PTGFR	EDN1	PRKAA1	VCAM1	MCTP1	CCL20	CXCR4	ATP2A2	KSR2	FPR2	EGFR	SLC8A1	CAMKK2	NUDT4	NMUR2	MCTP2	MCU
protein tetramerization (GO:0051262)	0.0782067	0.867182	21	ADSL	CPSF7	CPSF6	USP16	INSR	PKD2	SOD2	GRIN2B	GLS	CRYZ	ALDH1A3	NUDT21	ALDH5A1	CTH	HPRT1	AASS	CBR4	KCNJ2	TP63	FARSB	HCN1
negative regulation of GTPase activity (GO:0034260)	0.0789141	0.867182	7	ARFGEF1	LRCH1	RASA4	RCC2	RDX	TMED2	CPEB2
DNA recombination (GO:0006310)	0.0785479	0.867182	14	BARD1	GEN1	ATRX	RPA1	LIG4	NUCKS1	HMGB1	BRCA1	TSN	RAD54B	RAD21	THAP9	RBBP8	DNA2
cellular response to reactive oxygen species (GO:0034614)	0.0797069	0.867182	16	KCNC2	MPV17L	TNFAIP3	MTR	PKD2	FOXO1	EGFR	CAMKK2	MAPK13	PRDX3	MAPK9	IMPACT	FER	MAPK1	CYP1B1	MAP3K5
snRNA transcription (GO:0009301)	0.0798078	0.867182	17	GTF2A1	GTF2A2	POU2F1	CCNT2	CCNT1	NCBP2	INTS2	RPRD2	POU2F2	RPAP2	GTF2F2	SP1	POLR2D	POLR2F	NABP1	INTS7	INTS6
negative regulation of blood vessel morphogenesis (GO:2000181)	0.0797069	0.867182	16	TGFB2	SEMA6A	ROCK2	PDE3B	SEMA3E	KLK3	THBS2	THBS4	MECP2	RGCC	AGO1	COL4A3	KRIT1	PGK1	TEK	HOXA5
snRNA transcription from RNA polymerase II promoter (GO:0042795)	0.0798078	0.867182	17	GTF2A1	GTF2A2	POU2F1	CCNT2	CCNT1	NCBP2	INTS2	RPRD2	POU2F2	RPAP2	GTF2F2	SP1	POLR2D	POLR2F	NABP1	INTS7	INTS6
telencephalon cell migration (GO:0022029)	0.0986211	0.873054	3	FOXB1	FGF13	PEX13
negative regulation of cytoplasmic translation (GO:2000766)	0.0986211	0.873054	3	CPEB3	CPEB2	CPEB4
cellular response to bacterial lipopeptide (GO:0071221)	0.0986211	0.873054	3	CD36	TLR6	TIRAP
positive regulation of protein localization to endosome (GO:1905668)	0.0986211	0.873054	3	ROCK2	RDX	SORL1
regulation of wound healing, spreading of epidermal cells (GO:1903689)	0.0986211	0.873054	3	RREB1	PHLDB2	CLASP2
aortic valve development (GO:0003176)	0.0986211	0.873054	3	BMP4	TBX20	TWIST1
regulation of respiratory system process (GO:0044065)	0.0986211	0.873054	3	NLGN2	TSHZ3	PHOX2B
SREBP signaling pathway (GO:0032933)	0.0986211	0.873054	3	INSIG2	ERLIN1	ERLIN2
gap junction assembly (GO:0016264)	0.0986211	0.873054	3	GJC1	GJA1	GJB2
ventricular cardiac muscle cell development (GO:0055015)	0.0986211	0.873054	3	MEF2A	BMP10	PROX1
negative regulation of erythrocyte differentiation (GO:0045647)	0.0986211	0.873054	3	ZFP36	MAFB	HOXA5
positive regulation of memory T cell differentiation (GO:0043382)	0.0986211	0.873054	3	IL23A	TNFSF4	CD46
aortic valve morphogenesis (GO:0003180)	0.0986211	0.873054	3	BMP4	TBX20	TWIST1
tRNA wobble base modification (GO:0002097)	0.0990133	0.873054	4	URM1	ALKBH1	KIAA1456	ALKBH8
DNA dealkylation involved in DNA repair (GO:0006307)	0.0990133	0.873054	4	FTO	ASCC1	ALKBH1	ASCC3
positive regulation of protein localization to early endosome (GO:1902966)	0.0986211	0.873054	3	ROCK2	RDX	SORL1
purine ribonucleoside monophosphate catabolic process (GO:0009169)	0.0986211	0.873054	3	HPRT1	NUDT3	NUDT4
regulation of protein localization to early endosome (GO:1902965)	0.0986211	0.873054	3	ROCK2	RDX	SORL1
regulation of epithelial to mesenchymal transition involved in endocardial cushion formation (GO:1905005)	0.0986211	0.873054	3	ACVR1	TGFB2	TGFBR2
histone-serine phosphorylation (GO:0035404)	0.0986211	0.873054	3	RPS6KA5	PRKAA2	HMGA2
regulation of mesenchymal stem cell differentiation (GO:2000739)	0.0986211	0.873054	3	LTBP2	SOX6	SOX5
DNA dealkylation (GO:0035510)	0.0990133	0.873054	4	FTO	ASCC1	ALKBH1	ASCC3
maintenance of apical/basal cell polarity (GO:0035090)	0.0990133	0.873054	4	PDZD11	LIN7A	LIN7C	LRRD1
neuron projection maintenance (GO:1990535)	0.0986211	0.873054	3	APP	INSR	PSEN1
choline catabolic process (GO:0042426)	0.0986211	0.873054	3	DMGDH	SARDH	ALDH7A1
complement receptor mediated signaling pathway (GO:0002430)	0.0990133	0.873054	4	C5AR2	C5AR1	FPR3	FPR2
negative regulation of focal adhesion assembly (GO:0051895)	0.0935382	0.873054	5	RCC2	DLC1	PHLDB2	CORO1C	CLASP2
intraciliary retrograde transport (GO:0035721)	0.0990133	0.873054	4	ICK	DYNC2LI1	TTC21B	WDR35
nuclear pore complex assembly (GO:0051292)	0.0990133	0.873054	4	NUP93	AHCTF1	NUP205	TMEM33
ectoderm development (GO:0007398)	0.0990133	0.873054	4	AMER2	ITGAM	ITGA6	STX2
negative regulation of bone resorption (GO:0045779)	0.0986211	0.873054	3	P2RX7	UBASH3B	TNFAIP3
regulation of interleukin-12 secretion (GO:2001182)	0.0986211	0.873054	3	TLR8	MAPK14	FOXP1
protein localization to synapse (GO:0035418)	0.0990133	0.873054	4	NLGN1	NLGN2	KIF5C	NRXN1
definitive hemopoiesis (GO:0060216)	0.0986211	0.873054	3	TEK	HIPK1	ZFP36L2
regulation of cytoplasmic translation (GO:2000765)	0.0990133	0.873054	4	CPEB3	CPEB2	YBX3	CPEB4
positive regulation of sodium ion transmembrane transport (GO:1902307)	0.0986211	0.873054	3	WNK3	GLRX	ANK3
regulation of mitochondrial membrane permeability (GO:0046902)	0.0863669	0.873054	6	HEBP2	BNIP3	BCL2	NAIF1	ALKBH7	SLC25A4
neuron projection fasciculation (GO:0106030)	0.0990133	0.873054	4	SEMA5A	NRCAM	CNTN4	EPHB3
positive regulation of circadian rhythm (GO:0042753)	0.0990133	0.873054	4	NLGN1	RORA	BTRC	ARNTL2
cytochrome complex assembly (GO:0017004)	0.0990133	0.873054	4	SCO1	COX15	COX18	COX11
cell migration involved in sprouting angiogenesis (GO:0002042)	0.0935382	0.873054	5	NR4A1	FGF2	TDGF1	EPHB4	ROBO1
regulation of osteoclast development (GO:2001204)	0.0986211	0.873054	3	NOTCH2	FBN1	LTF
regulation of NLRP3 inflammasome complex assembly (GO:1900225)	0.0990133	0.873054	4	DHX33	EIF2AK2	CD36	TLR6
positive regulation of fibroblast apoptotic process (GO:2000271)	0.0986211	0.873054	3	BCL2L11	BTG1	TP63
3'-UTR-mediated mRNA destabilization (GO:0061158)	0.0990133	0.873054	4	ZFP36	RC3H1	CPEB3	ZFP36L2
positive regulation of vascular smooth muscle cell proliferation (GO:1904707)	0.0935382	0.873054	5	FGF9	PDGFB	MFN2	FGF2	BMPR1A
positive regulation of myoblast differentiation (GO:0045663)	0.0935382	0.873054	5	MYOG	BTG1	SMYD1	HIF1AN	MAPK14
peripheral nervous system neuron development (GO:0048935)	0.0986211	0.873054	3	ISL2	ETV1	RUNX1
branching involved in blood vessel morphogenesis (GO:0001569)	0.0935382	0.873054	5	SFRP2	COL4A1	NRARP	SEMA3E	TGFBR2
regulation of transforming growth factor beta production (GO:0071634)	0.0990133	0.873054	4	TGFB2	CD46	PTGS2	HIF1A
L-amino acid import (GO:0043092)	0.0986211	0.873054	3	SLC6A5	SLC1A1	SLC36A4
venous blood vessel morphogenesis (GO:0048845)	0.0986211	0.873054	3	CCBE1	TBX20	PROX1
complement activation, lectin pathway (GO:0001867)	0.0990133	0.873054	4	FCN2	COLEC10	C1S	MBL2
membrane lipid metabolic process (GO:0006643)	0.0863669	0.873054	6	KDELC2	AGMO	CYP1B1	SERINC1	ST3GAL6	TEX2
gliogenesis (GO:0042063)	0.0935382	0.873054	5	TGFB2	METTL14	CDK6	NFIB	PHOX2B
plasma membrane organization (GO:0007009)	0.0815786	0.873054	10	P2RX7	TRIM72	PLSCR1	SERP1	PLSCR4	CXCR4	ANO6	ANK3	FNBP1L	STX2
regulation of response to stress (GO:0080134)	0.0990133	0.873054	4	CRHBP	DYRK3	BMP10	ABCB1
regulation of nucleocytoplasmic transport (GO:0046822)	0.0935382	0.873054	5	BMP4	KHDRBS1	PTPN14	UHMK1	NUDT4
metanephros development (GO:0001656)	0.0958777	0.873054	7	BMP4	NIPBL	SIX4	NF1	SIX1	PKD2	FGF10
maintenance of epithelial cell apical/basal polarity (GO:0045199)	0.0990133	0.873054	4	PDZD11	LIN7A	LIN7C	LRRD1
inositol phosphate metabolic process (GO:0043647)	0.0984929	0.873054	12	INPP4A	INPP4B	MINPP1	INPP5A	PLCB4	PPIP5K2	INPP1	IPMK	CALM1	FGF2	NUDT3	NUDT4
regulation of axon extension involved in axon guidance (GO:0048841)	0.0958777	0.873054	7	SEMA5A	SEMA4A	SEMA3C	SEMA4C	SEMA3E	SEMA4F	PLXNA3
positive regulation of synaptic transmission, glutamatergic (GO:0051968)	0.0863669	0.873054	6	NLGN1	CACNG8	NLGN2	TSHZ3	NRXN1	SHANK2
positive regulation of oxidative stress-induced cell death (GO:1903209)	0.0986211	0.873054	3	SFPQ	RIPK1	TLR6
neuronal action potential (GO:0019228)	0.0958777	0.873054	7	CATSPER2	KCNMB2	SCN7A	ANK3	SCN2A	SCN3A	SCN1A
regulation of vascular endothelial growth factor production (GO:0010574)	0.0861816	0.873054	8	CCBE1	CYP1B1	RORA	BRCA1	PTGS2	HIF1A	NOX1	SULF2
positive regulation of mitochondrial outer membrane permeabilization involved in apoptotic signaling pathway (GO:1901030)	0.0947248	0.873054	10	PPP3R1	BCL2L11	TFDP1	TFDP2	BCL2	TP53BP2	DYNLL2	YWHAZ	YWHAG	TP63
actin polymerization or depolymerization (GO:0008154)	0.0815786	0.873054	10	GHSR	ABI2	COBLL1	CFL2	MSRB2	DSTN	MICAL2	COBL	ANG	WASF3
maintenance of protein location in extracellular region (GO:0071694)	0.0986211	0.873054	3	LTBP1	DAND5	FBN1
positive regulation of dendrite development (GO:1900006)	0.0912443	0.873054	9	NLGN1	SS18L1	IL1RAPL1	COBL	LLPH	PSEN1	CPEB3	SHANK2	BMP5
peptidyl-lysine dimethylation (GO:0018027)	0.0990133	0.873054	4	SETD2	SETD7	SMYD2	ASH1L
protein acylation (GO:0043543)	0.0815786	0.873054	10	ING5	KAT2B	ZDHHC20	KAT6A	ZDHHC5	ZDHHC21	ZDHHC2	FOXO1	ZDHHC14	ZDHHC15
negative regulation of myeloid leukocyte differentiation (GO:0002762)	0.0861816	0.873054	8	MAFB	CDK6	MYC	INHBA	ZNF675	TLR3	PTPN2	FBN1
cellular amino acid catabolic process (GO:0009063)	0.0958777	0.873054	7	ALDH6A1	ALDH5A1	AUH	CTH	DBT	BCKDHB	ADO
purine ribonucleoside triphosphate metabolic process (GO:0009205)	0.0912443	0.873054	9	ENTPD5	RAB23	FIGNL1	GNAI3	ENPP1	NDUFS1	ATP1A2	AK4	CLPX
central nervous system neuron differentiation (GO:0021953)	0.0912443	0.873054	9	NR4A2	GRID2	AGTPBP1	OPHN1	RYK	FAIM2	PROX1	PHOX2B	LRP6
positive regulation of type I interferon production (GO:0032481)	0.0994427	0.873054	15	SETD2	CRCP	PTPN22	TBK1	POLR3A	DHX33	POLR3D	DHX36	POLR3E	POLR3F	POLR3G	POLR2F	POLR3K	TLR3	MYD88
phosphatidylinositol phosphorylation (GO:0046854)	0.0861816	0.873054	8	PIKFYVE	SMG1	PIK3C3	PIK3CB	PIK3C2A	FAM126A	PIK3CG	PI4K2A
regulation of dendrite development (GO:0050773)	0.0947248	0.873054	10	CAMK1D	DCC	SDC2	HECW1	COBL	NEDD4L	TNIK	RTN4IP1	CPEB3	BMP5
regulation of osteoclast differentiation (GO:0045670)	0.0947248	0.873054	10	NOTCH2	MAFB	UBASH3B	IFNG	IL23A	TRAF6	CAMK4	ZNF675	TLR3	FBN1
phosphatidylserine metabolic process (GO:0006658)	0.0861816	0.873054	8	PLA2G16	OSBPL8	PLA2G12A	PLA2G2D	PLSCR1	PTDSS1	PLA2G4D	SERINC1
positive regulation of ion transport (GO:0043270)	0.0865481	0.873054	12	P2RX7	RAB3B	CACNB2	SNX4	STIM2	KIF5B	CNKSR3	F2R	WNK3	ANO6	ANK3	MYLK
cartilage development (GO:0051216)	0.0865481	0.873054	12	BMP4	WNT2B	NOV	NFIB	HMGA2	ITGB8	GDF5	FGF2	CD44	RUNX2	SULF2	RUNX1
ion transmembrane transport (GO:0034220)	0.0928031	0.873054	45	SLC24A2	GABRB3	GABRB2	GABRB1	ATP8A1	ATP10D	ATP2A2	NEDD4L	ATP1A2	ATP10A	ATP2C1	AQP2	NALCN	GABRR2	GJA1	PDZD11	BSND	LRRC8C	LRRC8D	LRRC8B	ATP6V1C1	ATP6V1C2	GABRA2	SLC13A1	GABRA1	MMGT1	GABRA4	TSC22D3	SLC12A1	GABRA3	ATP2B4	ATP2B2	ATP11B	ANO6	ATP2B1	ANO3	TRDN	SLC9B2	P2RX7	CLCN5	CLCN4	OSTM1	SGK3	SGK2	UNC79
polyol metabolic process (GO:0019751)	0.0984929	0.873054	12	INPP4A	INPP4B	MINPP1	INPP5A	PLCB4	PPIP5K2	INPP1	IPMK	CALM1	SLC5A3	NUDT3	NUDT4
positive regulation of catabolic process (GO:0009896)	0.0994427	0.873054	15	BARD1	NSF	TNFAIP3	NEDD4L	ASB11	IDE	SORL1	OAZ1	FOXO1	APC	HECW1	ANGPTL3	ASB5	TRIM32	DACT1
negative regulation of transmembrane receptor protein serine/threonine kinase signaling pathway (GO:0090101)	0.0974768	0.873054	18	ACVR1	SMAD2	DLX1	LDLRAD4	ASPN	TGFBR2	PBLD	PPM1A	EID2	ADAM17	BMPER	NOV	BAMBI	SNX25	CD109	SOSTDC1	DAND5	SNX6
regulation of erythrocyte differentiation (GO:0045646)	0.0912443	0.873054	9	ZFP36	MAFB	CDK6	INHBA	FOXO3	MAPK14	HIF1A	ACVR2A	HOXA5
regulation of neuron death (GO:1901214)	0.0983426	0.873054	17	GRID2	ITGAM	DCC	KIF14	RRAS2	GPR75	FAIM2	TSC1	GRIN2B	SORL1	CLU	TBK1	TRIM2	PPARGC1A	EPHB1	TP63	MAP3K5
regulation of tumor necrosis factor production (GO:0032680)	0.089017	0.873054	15	C5AR2	TNFAIP3	TWIST1	PTPN22	IRAK3	CLU	TIRAP	FOXP1	ZFP36	IL23A	RIPK1	TRIM27	TLR3	LTF	HAVCR2
response to steroid hormone (GO:0048545)	0.0947248	0.873054	10	YAP1	TGFB2	CATSPER2	PAQR7	ABHD2	ATP1A2	UBE3A	CSN1S1	NR3C1	TFPI
positive regulation of protein metabolic process (GO:0051247)	0.0848946	0.873054	22	BARD1	NSF	MTPN	APP	RAB1A	ROCK2	TNFAIP3	NEDD4L	ASB11	PSEN1	INHBA	IDE	SORL1	OAZ1	CLU	FOXO1	HNRNPK	APC	HECW1	ASB5	TRIM32	DACT1
positive regulation of cellular component biogenesis (GO:0044089)	0.0953183	0.873054	20	NLGN1	GRID2	BHLHB9	NLGN2	CLSTN2	BDNF	SYNPO2	NRXN1	CLSTN1	VPS4A	STAM	RGCC	IFNG	TPR	IL1RAPL1	TPPP	FNIP2	EPHB1	PFN2	EPHB3
positive regulation of apoptotic process (GO:0043065)	0.0969413	0.873054	61	ITGB1	TOP2A	TNFAIP8	BTG1	HMGB1	IFIT2	ING5	AKAP13	AIFM1	MYC	CYP1B1	HOXA5	TP63	MAP3K5	UNC13B	STPG1	KLF11	BNIP3L	ARHGEF12	PRMT2	APAF1	F2R	PAWR	ANO6	SFRP2	TRAF6	PTRH2	SIK1	ITGA6	IAPP	SOS1	ARHGEF5	ARHGEF6	PXT1	DCUN1D3	PSEN1	FOXO3	FOXO1	PPM1F	MAPK9	BCLAF1	ACVR1C	BCL2L11	PNMA1	FRZB	UBD
calcium ion transport (GO:0006816)	0.0943051	0.873054	26	SLC24A2	CALCRL	CATSPER2	ATP2A2	PSEN1	PKD2	ATP2C1	NALCN	SLC8A1	TMEM165	CACNG8	ITGAV	TRPM7	TRPM6	TRPM3	TRPC3	TRPC4	TRPC1	ATP2B4	ATP2B2	ANO6	TMCO1	CACNB2	GRIN3A	STIM2	NMUR2
stress-activated MAPK cascade (GO:0051403)	0.0994427	0.873054	15	PTGER4	MAPK14	MAPK13	MAPK10	MAPK9	ZFP36	TRAF6	UBE2N	TAB3	MAPK1	TAB1	BTRC	MAP3K7	MAP3K5	ARHGEF6
positive regulation of developmental process (GO:0051094)	0.096028	0.873054	24	DLX1	BMP10	PAXIP1	TFRC	HPN	PDGFB	MFF	CTGF	CORO1C	LRP6	RPS6KA3	AGR2	SOX6	JUNB	RREB1	SOX5	ACVR1	BNIP3	INSR	SOX11	PA2G4	DDHD1	2019-03-05	BMP4	BMPR1A
JNK cascade (GO:0007254)	0.0890281	0.873054	16	PTGER4	MAP3K2	MAPK10	MAPK9	MDFIC	TRAF6	TAOK1	UBE2N	TAB3	RIPK1	TNIK	MAP3K9	TAB1	MAP3K7	MAP3K5	ARHGEF6
cellular calcium ion homeostasis (GO:0006874)	0.0925807	0.873054	27	SLC24A2	CCL13	CD40	CALCB	ATP2A2	HTR2C	PSEN1	ATP2C1	TMEM165	PKHD1	PLN	PDZD8	TRPC3	TRPC4	TRPC1	EPHX2	ATP2B4	ATP2B2	ATP2B1	F2	TMCO1	CHERP	TRDN	STIM2	BCL2	ATP13A3	MCU
positive regulation of cytosolic calcium ion concentration (GO:0007204)	0.0891488	0.873054	29	PTGER4	PTGFR	GPR65	C5AR2	C5AR1	LPAR1	CXCR4	HTR2C	FPR3	HMGB1	FPR2	CXCL13	GRM1	SLC8A1	EDNRA	CYSLTR1	P2RY1	BDKRB2	CCR7	CD36	CCR4	EDN1	TRPC3	F2R	ESR1	P2RX7	OR5T1	NMUR2	IAPP
positive regulation of cellular component organization (GO:0051130)	0.0826686	0.873054	24	SH3GLB1	TGFB2	NLGN1	GRID2	BHLHB9	NLGN2	CLSTN2	BDNF	FRMPD4	BNIP3	INSR	NRXN1	SURF4	CLSTN1	NEDD4L	DLL1	LMAN1	IFNG	IL1RAPL1	TPPP	FNIP2	EPHB1	NOX1	EPHB3
RNA polyadenylation (GO:0043631)	0.102211	0.877346	8	NUDT21	APP	CPSF6	SSU72	PAPD4	PAPOLB	PABPC1	GRSF1
neural crest cell migration (GO:0001755)	0.102211	0.877346	8	SEMA4A	SEMA3C	SEMA4C	SEMA3E	SEMA4F	PHOX2B	PHACTR4	CORO1C
production of miRNAs involved in gene silencing by miRNA (GO:0035196)	0.102211	0.877346	8	SMAD2	ZCCHC11	AGO3	AGO1	DROSHA	DICER1	TARBP2	PUM2
negative regulation of response to DNA damage stimulus (GO:2001021)	0.102211	0.877346	8	PSMD10	SFRP2	SNAI1	TWIST1	ACKR3	TRIM32	CLU	CD44
chondrocyte differentiation (GO:0002062)	0.102211	0.877346	8	BMP4	WNT2B	NOV	NFIB	HMGA2	RUNX2	SULF2	RUNX1
ventricular septum development (GO:0003281)	0.102211	0.877346	8	ACVR1	HEYL	TGFB2	HEY1	SOX11	PROX1	DAND5	TGFBR2
regulation of cell morphogenesis (GO:0022604)	0.102211	0.877346	8	STRIP1	ZMYM2	ZMYM4	PHIP	LARP4	KIAA1958	PDZD8	CD44
acute inflammatory response (GO:0002526)	0.102211	0.877346	8	CRP	PLSCR1	TNFSF4	DLC1	CNTN1	ANO6	KLK3	MBL2
negative regulation of homeostatic process (GO:0032845)	0.102211	0.877346	8	P2RX7	ZFP36	MAFB	UBASH3B	TSC22D3	BCL2	TNFAIP3	HOXA5
phosphatidylinositol biosynthetic process (GO:0006661)	0.101114	0.877346	22	CDS1	RAB4A	PIGN	SACM1L	PIGP	MTMR8	MTMR9	PIK3CB	SYNJ2	PTPN13	PIK3C2A	FGF2	PIK3CG	MTMR7	INPP4A	INPP4B	PIKFYVE	INPP5E	PIK3C3	MPPE1	RAB5A	PI4K2A
response to molecule of bacterial origin (GO:0002237)	0.101114	0.877346	22	CXCL6	CD40	FZD5	F2R	TNFAIP3	PTPN22	IRAK3	PPBP	CXCL13	CXCL5	TIRAP	FOXP1	PRDX3	CXCL10	RPS6KA3	ADAM17	FER	FAS	TNFRSF14	JUNB	IFNAR1	HNRNPA0
regulation of cellular component organization (GO:0051128)	0.101018	0.877346	30	KIF14	STON1	STON2	STRIP1	ZMYM2	NCLN	OPHN1	ZMYM4	STK38L	ROS1	PDZD8	CD177	RAB4A	PIFO	IRAK3	LARP4	ERMN	BBS10	RUFY2	BMP2K	AAK1	RAPGEF2	SGK3	PHIP	NOX5	KIAA1958	SGK2	EBAG9	RAB5A	PAPPA2
cellular response to organic cyclic compound (GO:0071407)	0.10318	0.884015	29	GABRB3	HCN4	GABRB2	GABRB1	ROCK2	PDGFB	ATP1A2	RORA	AKAP6	BRCA1	AHR	NR3C1	TFPI	PKD2	GNAI1	EGFR	HSP90B1	CRHBP	GNG2	NRIP1	CYP1B1	MYOG	SSTR2	ESR1	SSH1	IMPACT	PDE12	RAPGEF2	HCN1
divalent metal ion transport (GO:0070838)	0.10433	0.890561	20	SLC30A9	CALCRL	CATSPER2	SLC30A8	TRPC3	TRPC4	MMGT1	TRPC1	SLC30A5	SLC11A2	SLC41A1	ATP2B2	NIPA2	PSEN1	PKD2	ATP2C1	NALCN	CACNG8	GRIN3A	NMUR2
negative regulation of translation (GO:0017148)	0.10433	0.890561	20	SAMD4A	EIF2AK2	TSC1	MALSU1	TNRC6C	SYNCRIP	METTL14	PAIP2B	MEX3B	CNOT6	CNOT7	TPR	IGF2BP1	EIF4EBP2	IGF2BP2	PAIP2	CPEB3	CPEB2	TNRC6A	CPEB4
positive regulation of toll-like receptor signaling pathway (GO:0034123)	0.106533	0.896119	6	TICAM2	PTPN22	HMGB1	TLR3	TIRAP	LTF
negative regulation of cell junction assembly (GO:1901889)	0.106533	0.896119	6	ROCK2	RCC2	DLC1	PHLDB2	CORO1C	CLASP2
vesicle transport along microtubule (GO:0047496)	0.106533	0.896119	6	FYCO1	RAB1A	KIF3A	KIF5B	HAP1	PAFAH1B1
extrinsic apoptotic signaling pathway in absence of ligand (GO:0097192)	0.106533	0.896119	6	MOAP1	ERBB3	DCC	BCL2	ITGAV	APPL1
regulation of cell-substrate adhesion (GO:0010810)	0.106387	0.896119	9	ALOX15	NF1	AGR2	GCNT2	TSC1	PLG	PIK3CB	PPM1F	CORO1C
embryonic organ morphogenesis (GO:0048562)	0.106387	0.896119	9	ACVR1	ALDH1A3	NIPBL	EFEMP1	TBX20	POLR2D	SIX1	SOX11	FBN1
positive regulation of biomineral tissue development (GO:0070169)	0.106387	0.896119	9	P2RX7	ACVR1	BMP4	TFAP2A	ANO6	ACVR2A	GPM6B	SLC8A1	BMPR1A
negative regulation of neuron death (GO:1901215)	0.105838	0.896119	19	FOXB1	PRKCI	CNTF	SET	BHLHB9	BDNF	F2R	KIF14	LIG4	SIX1	SOD2	SORL1	TOX3	ERBB3	SIX4	BCL2	PPARGC1A	NAIP	CPEB4
homotypic cell-cell adhesion (GO:0034109)	0.109048	0.912288	10	RAP2B	UBASH3B	STXBP3	ITGB3	FGG	GNAS	PIK3CB	METAP1	PIK3CG	VCL
membrane depolarization during action potential (GO:0086010)	0.109048	0.912288	10	HCN4	CATSPER2	SCN7A	ATP1A2	SCN2A	SCN3A	NALCN	KCNJ2	SLC8A1	SCN1A
regulation of ossification (GO:0030278)	0.109048	0.912288	10	ACVR1	BMP4	TGFB2	ANKH	S1PR1	BMP2K	ENPP1	TWIST1	SOX11	LRP6
macromolecular complex assembly (GO:0065003)	0.109875	0.917544	26	YAP1	CD40	SF3B3	KMT2A	WIPF1	LIN7A	NFS1	LPXN	KNTC1	PPARGC1A	TEAD1	WASF3	TEAD2	DARS	FGG	DNAJB14	TRAF1	CD2AP	TAPBP	SLC7A6	APC	CNKSR3	FAS	MDM4	TUBGCP4	LLGL1
positive regulation of interleukin-6 production (GO:0032755)	0.110615	0.918745	11	TSLP	TNFSF4	F2R	TLR8	TWIST1	TLR6	HMGB1	TLR3	TIRAP	MYD88	MAPK13
cardiac ventricle morphogenesis (GO:0003208)	0.110615	0.918745	11	HEYL	TGFB2	BMP10	SFRP2	HEY1	TBX20	CPE	SOX11	PROX1	TGFBR2	BMPR1A
activation of protein kinase activity (GO:0032147)	0.110304	0.918745	47	PRKAA1	MAPKAP1	ITGB3	C5AR1	KIF14	PDGFB	MAP3K7CL	CXCR4	PIK3CB	FGF2	STK10	NEK1	MAPK1	S1PR2	PRKACB	MAP3K7	PROK1	MAP3K5	MAP2K6	MAP3K2	OSBPL8	TGFB2	MAP3K1	ANGPT1	INSR	F2R	EIF2AK2	FRS2	MAPK14	PRLR	TIRAP	TGFBR2	BMP4	TAOK3	STK24	PRKAR1A	TRAF6	TAOK1	UBE2N	TAB3	ANG	TNIK	TLR6	TAB1	TDGF1	TLR3
positive regulation of signal transduction (GO:0009967)	0.11147	0.924177	42	NLGN1	NLGN2	MAML2	ITGB3	NRXN1	HIF1A	DLL1	ROBO1	DSTYK	ADAMTS3	GRB10	RSPO3	DISC1	TRIM44	TP63	ATP6V1C2	DACT1	UNC13B	CCBE1	TGFB2	MBD5	PRKCI	TSLP	BDNF	CD180	SULF2	PPM1A	KAT2B	TSPAN14	EVC	NOV	ASXL2	BMP2K	LANCL2	AAK1	CNTN1	FAS	PHIP	CD226	TEK	SHANK2	TLR3
regulation of toll-like receptor 3 signaling pathway (GO:0034139)	0.138645	0.929177	3	TNFAIP3	PTPN22	TIRAP
cellular divalent inorganic anion homeostasis (GO:0072501)	0.138645	0.929177	3	ENPP1	GPCPD1	XPR1
positive regulation of chondrocyte differentiation (GO:0032332)	0.129488	0.929177	4	SOX6	GDF5	SOX5	LOXL2
regulation of memory T cell differentiation (GO:0043380)	0.138645	0.929177	3	IL23A	TNFSF4	CD46
pharyngeal arch artery morphogenesis (GO:0061626)	0.138645	0.929177	3	BMP4	TGFB2	BMPR1A
regulation of collateral sprouting (GO:0048670)	0.138645	0.929177	3	BDNF	DCC	FGF13
negative regulation of cardiac muscle hypertrophy (GO:0010614)	0.129488	0.929177	4	RGS2	BMP10	ATP2B4	FOXO1
cellular trivalent inorganic anion homeostasis (GO:0072502)	0.138645	0.929177	3	ENPP1	GPCPD1	XPR1
negative regulation of calcium ion import (GO:0090281)	0.138645	0.929177	3	PLN	TRIM27	EPPIN
cellular response to histamine (GO:0071420)	0.138645	0.929177	3	GABRB3	GABRB2	GABRB1
nucleoside diphosphate metabolic process (GO:0009132)	0.138645	0.929177	3	CMPK1	CMPK2	AK4
regulation of mitochondrial fusion (GO:0010635)	0.138645	0.929177	3	PID1	BNIP3	OMA1
regulation of transcription from RNA polymerase II promoter involved in heart development (GO:1901213)	0.138645	0.929177	3	ACVR1	BMP4	BMPR1A
cellular response to sterol depletion (GO:0071501)	0.138645	0.929177	3	INSIG2	ERLIN1	ERLIN2
negative regulation of signal transduction by p53 class mediator (GO:1901797)	0.117968	0.929177	5	PSMD10	SNAI1	TWIST1	RFFL	CD44
regulation of low-density lipoprotein particle receptor biosynthetic process (GO:0045714)	0.138645	0.929177	3	HNRNPK	ITGB3	ITGAV
negative regulation of protein localization to cell surface (GO:2000009)	0.129488	0.929177	4	LEPROT	LEPROTL1	NEDD4L	GPM6B
regulation of histone H3-K9 acetylation (GO:2000615)	0.138645	0.929177	3	KMT2A	CHEK1	BRCA1
regulation of cardiac muscle cell membrane potential (GO:0086036)	0.138645	0.929177	3	PLN	ATP2A2	TRDN
atrial septum morphogenesis (GO:0060413)	0.129488	0.929177	4	ACVR1	NOTCH2	TGFB2	TBX20
response to nitric oxide (GO:0071731)	0.129488	0.929177	4	KCNC2	CCR7	MTR	FOXO1
negative regulation of cardiocyte differentiation (GO:1905208)	0.138645	0.929177	3	FRS2	SOX6	EGFR
cellular phosphate ion homeostasis (GO:0030643)	0.138645	0.929177	3	ENPP1	GPCPD1	XPR1
regulation of RNA polymerase II transcriptional preinitiation complex assembly (GO:0045898)	0.129488	0.929177	4	ATF7IP	PSMC4	HMGB1	ESR1
cellular response to interferon-alpha (GO:0035457)	0.138645	0.929177	3	PDE12	TPR	IFNAR1
embryonic eye morphogenesis (GO:0048048)	0.129488	0.929177	4	ALDH1A3	EFEMP1	FBN1	LRP6
regulation of cyclic nucleotide metabolic process (GO:0030799)	0.138645	0.929177	3	CALM3	PKD2	CALM1
regulation of synaptic transmission, GABAergic (GO:0032228)	0.129488	0.929177	4	USP46	NLGN1	NLGN2	HAP1
histone H3-K4 demethylation (GO:0034720)	0.138645	0.929177	3	KDM5A	KDM5B	KDM1B
negative regulation of DNA-dependent DNA replication (GO:2000104)	0.117968	0.929177	5	PID1	STAG2	DONSON	LIG3	ZNF830
sulfur amino acid biosynthetic process (GO:0000097)	0.138645	0.929177	3	CTH	MTR	CDO1
positive regulation of collagen metabolic process (GO:0010714)	0.117968	0.929177	5	BMP4	HDAC2	RGCC	F2R	F2
microglial cell activation (GO:0001774)	0.138645	0.929177	3	ITGAM	FPR2	CLU
negative regulation of leukocyte cell-cell adhesion (GO:1903038)	0.129488	0.929177	4	DUSP3	PTPN22	VTCN1	PAG1
cardiac muscle cell differentiation (GO:0055007)	0.117968	0.929177	5	ACVR1	AKAP13	SIK1	PROX1	SLC8A1
histone mRNA metabolic process (GO:0008334)	0.114684	0.929177	7	LSM11	NCBP2	PAPD5	PAPD4	SNRPE	SNRPD3	DCP2
regulation of vascular endothelial growth factor signaling pathway (GO:1900746)	0.129488	0.929177	4	CCBE1	ADAMTS3	DLL1	ROBO1
ribosomal protein import into nucleus (GO:0006610)	0.138645	0.929177	3	TNPO1	RANBP6	KPNB1
retrograde axonal transport (GO:0008090)	0.138645	0.929177	3	DST	HAP1	PAFAH1B1
replicative senescence (GO:0090399)	0.129488	0.929177	4	MME	CHEK1	PLA2R1	WNT16
digestive tract morphogenesis (GO:0048546)	0.117968	0.929177	5	NIPBL	AGR2	SOX11	BBS7	EPHB3
negative regulation of cellular component movement (GO:0051271)	0.117968	0.929177	5	PKHD1	ACTN1	CCDC125	SPOCK3	CD9
branching involved in ureteric bud morphogenesis (GO:0001658)	0.128889	0.929177	6	BMP4	MYC	SIX1	HOXD11	PKD2	FGF2
T cell differentiation in thymus (GO:0033077)	0.129488	0.929177	4	ADAM17	LIG4	GLI3	ZFP36L2
positive regulation of superoxide anion generation (GO:0032930)	0.129488	0.929177	4	CRP	ITGAM	FPR2	CD177
regulation of non-canonical Wnt signaling pathway (GO:2000050)	0.129488	0.929177	4	RNF213	NPHP3	RSPO3	DACT1
positive regulation of phosphoprotein phosphatase activity (GO:0032516)	0.117968	0.929177	5	PPP1R12A	CALM3	AKAP6	AGTR2	CALM1
positive regulation of stress-activated protein kinase signaling cascade (GO:0070304)	0.117968	0.929177	5	TGFB2	TAOK3	TAOK1	SEMA4C	EIF2AK2
positive regulation of neutrophil chemotaxis (GO:0090023)	0.114684	0.929177	7	CXCL6	CAMK1D	CCR7	PPBP	CXCL5	TIRAP	THBS4
spinal cord development (GO:0021510)	0.129488	0.929177	4	NF1	SOX11	PKD2	DLL1
positive regulation of cytokine production involved in immune response (GO:0002720)	0.117968	0.929177	5	FZD5	TNFSF4	TRAF6	B2M	MAP3K7
L-methionine salvage (GO:0071267)	0.138645	0.929177	3	MTAP	BHMT2	MRI1
T-helper cell differentiation (GO:0042093)	0.129488	0.929177	4	PTGER4	RORA	HMGB1	FOXP1
positive regulation of transmembrane transport (GO:0034764)	0.138645	0.929177	3	P2RX7	ANO6	AZIN1
negative regulation of ryanodine-sensitive calcium-release channel activity (GO:0060315)	0.129488	0.929177	4	CALM3	PKD2	CALM1	TRDN
negative regulation of protein depolymerization (GO:1901880)	0.128889	0.929177	6	LIMA1	PLEKHH2	APC	FGF13	TTBK2	CLASP2
positive regulation of T cell migration (GO:2000406)	0.128889	0.929177	6	CXCL10	APP	ADAM17	CCL20	DOCK8	CXCL13
regulation of cell projection organization (GO:0031344)	0.138645	0.929177	3	FAM110C	PIFO	ERMN
ureteric bud morphogenesis (GO:0060675)	0.128889	0.929177	6	BMP4	MYC	SIX1	HOXD11	PKD2	FGF2
sensory organ morphogenesis (GO:0090596)	0.138645	0.929177	3	NIPBL	COL5A2	GLI3
regulation of viral release from host cell (GO:1902186)	0.135257	0.929177	7	TRIM5	VPS4A	CHMP2B	TRIM35	VPS37B	TRIM32	TRIM11
positive regulation of endothelial cell apoptotic process (GO:2000353)	0.129488	0.929177	4	CD40	PRKCI	RGCC	ANO6
positive regulation of immune effector process (GO:0002699)	0.114684	0.929177	7	ANKRD17	IFNG	IL23A	TNFSF4	MYO18A	CD46	PUM2
cellular response to corticosteroid stimulus (GO:0071384)	0.117968	0.929177	5	ZFP36	BCL2L11	NR3C1	SSTR2	ZFP36L2
positive regulation of dendritic spine development (GO:0060999)	0.128889	0.929177	6	NLGN1	BHLHB9	LLPH	PSEN1	CPEB3	SHANK2
inhibition of cysteine-type endopeptidase activity (GO:0097340)	0.117968	0.929177	5	XIAP	BIRC5	BIRC2	NAIP	BIRC3
TRIF-dependent toll-like receptor signaling pathway (GO:0035666)	0.11978	0.929177	8	TBK1	TICAM2	UBE2D1	RIPK1	TLR6	TLR3	BIRC2	BIRC3
embryonic cranial skeleton morphogenesis (GO:0048701)	0.117968	0.929177	5	TFAP2A	NIPBL	TWIST1	SIX1	TGFBR2
postsynaptic density assembly (GO:0097107)	0.138645	0.929177	3	NLGN2	NRXN1	SHANK2
positive regulation of neutrophil migration (GO:1902624)	0.135257	0.929177	7	CXCL6	CAMK1D	CCR7	PPBP	CXCL5	TIRAP	THBS4
regulation of receptor biosynthetic process (GO:0010869)	0.129488	0.929177	4	HDAC2	EDN1	HIF1A	HOXA5
regulation of embryonic development (GO:0045995)	0.11978	0.929177	8	RPS6KA6	NIPBL	INSR	TRIP12	PHLDB2	DLL1	CCSAP	CLASP2
regulation of neutrophil chemotaxis (GO:0090022)	0.11978	0.929177	8	CXCL6	CAMK1D	C5AR2	CCR7	PPBP	CXCL5	TIRAP	THBS4
response to progesterone (GO:0032570)	0.128889	0.929177	6	YAP1	TGFB2	CATSPER2	ABHD2	UBE3A	CSN1S1
negative regulation of cellular metabolic process (GO:0031324)	0.122852	0.929177	9	TFAP2A	EDN1	BTN2A2	ITGB3	SIRT5	ITGAV	AP1AR	BRCA1	OPTN
apoptotic mitochondrial changes (GO:0008637)	0.122852	0.929177	9	ATG3	BNIP3	BCL2	NAIF1	NDUFS1	MFF	SOD2	CLU	IFIT2
cytoplasmic pattern recognition receptor signaling pathway (GO:0002753)	0.114684	0.929177	7	TRAF6	UBE2N	TAB3	TNFAIP3	TAB1	MAP3K7	MAP2K6
regulation of protein import into nucleus (GO:0042306)	0.135257	0.929177	7	BMP4	MDFIC	GNAQ	TPR	ZIC1	DACT1	RBM22
prostaglandin metabolic process (GO:0006693)	0.135257	0.929177	7	EDN1	ACOX1	AKR1C2	AKR1C4	PTGS2	PTGR2	PTGS1
MyD88-independent toll-like receptor signaling pathway (GO:0002756)	0.138833	0.929177	8	TBK1	TICAM2	UBE2D1	RIPK1	TLR6	TLR3	BIRC2	BIRC3
regulation of interferon-beta production (GO:0032648)	0.122852	0.929177	9	YY1	TBK1	POLR3A	POLR3D	POLR3F	REL	POLR3G	TLR3	TIRAP
peptidyl-tyrosine dephosphorylation (GO:0035335)	0.135257	0.929177	7	DUSP3	PTPRZ1	UBASH3B	DUSP28	DUSP18	PTPN13	PTPN2
endoplasmic reticulum organization (GO:0007029)	0.122852	0.929177	9	RAB10	LMAN1	LMAN2L	ATL3	TMEM33	CAV2	TOR1AIP2	TMCC1	TRDN
positive regulation of collagen biosynthetic process (GO:0032967)	0.117968	0.929177	5	BMP4	HDAC2	RGCC	F2R	F2
female gamete generation (GO:0007292)	0.135257	0.929177	7	PIWIL2	DIAPH2	MCM8	MCM9	MEI4	C14ORF39	HORMAD1
positive regulation of calcium ion transmembrane transport (GO:1904427)	0.135257	0.929177	7	CACNB2	CXCL10	TRPC1	F2R	APLNR	AKAP6	F2
embryonic limb morphogenesis (GO:0030326)	0.122852	0.929177	9	TFAP2A	TGFB2	CYP26B1	HDAC2	NIPBL	TWIST1	AFF3	GLI3	LRP6
hippo signaling (GO:0035329)	0.138833	0.929177	8	TJP1	YAP1	MOB1B	MOB1A	AMOTL1	TEAD1	TEAD2	SAV1
nucleotide-binding domain, leucine rich repeat containing receptor signaling pathway (GO:0035872)	0.135257	0.929177	7	TRAF6	UBE2N	TAB3	TNFAIP3	TAB1	MAP3K7	MAP2K6
negative regulation of release of sequestered calcium ion into cytosol (GO:0051280)	0.129488	0.929177	4	CALM3	PKD2	CALM1	TRDN
mitotic nuclear envelope disassembly (GO:0007077)	0.125219	0.929177	11	NUP93	CCNB2	NEK9	NUP205	CNEP1R1	TPR	NUP35	NUP43	LPIN1	RAE1	NUP37
bile acid and bile salt transport (GO:0015721)	0.138833	0.929177	8	NCOA1	NCOA2	SLC10A6	SLC10A2	SLCO1B3	SLCO1A2	AKR1C4	ABCB11
positive regulation of cation channel activity (GO:2001259)	0.138833	0.929177	8	CALM3	AKAP6	ANK3	HAP1	PKD2	CALM1	CTSS	TRDN
positive regulation of peptidyl-threonine phosphorylation (GO:0010800)	0.135257	0.929177	7	APP	WNK3	MAPK1	CALM3	S1PR2	CALM1	UBE2K
positive regulation of fat cell differentiation (GO:0045600)	0.12453	0.929177	10	CCDC71L	ZFP36	CREB1	SFRP2	FRZB	SYAP1	ASXL2	WDFY2	PTGS2	CMKLR1
adherens junction organization (GO:0034332)	0.125219	0.929177	11	CADM1	CADM2	CTNND1	CDH11	ANG	PVR	CDH8	VCL	CDH18	CDH7	CDH19
glycerophospholipid biosynthetic process (GO:0046474)	0.119986	0.929177	34	CDS1	ALOX15	LPCAT1	MTMR8	MTMR9	PIK3CB	PLD1	PIK3C2A	FGF2	PIK3CG	MTMR7	AGPAT4	PTDSS1	ACP6	INPP5E	CPNE3	PLA2G12A	PLA2G2D	RAB4A	PCYT1B	PCYT1A	PLA2G4D	SACM1L	DDHD1	SYNJ2	PTPN13	INPP4A	INPP4B	PIKFYVE	PLSCR1	PIK3C3	LPIN1	RAB5A	PI4K2A
collagen fibril organization (GO:0030199)	0.11978	0.929177	8	TGFB2	ADAMTS3	COL14A1	COL11A1	COL5A2	NF1	CYP1B1	LOXL2
regulation of Ras protein signal transduction (GO:0046578)	0.123899	0.929177	20	NOTCH2	TGFB2	MAPKAP1	RDX	SPRY4	KIF14	RASAL2	ASAP2	ACAP2	OPHN1	RASA4	NF1	SPRY3	MFN2	SPRY1	STAMBP	SMAP2	RALGPS1	FGF10	APPL1
action potential (GO:0001508)	0.124639	0.929177	13	SCARB2	CATSPER2	KCNB1	AKAP6	ANK3	NALCN	GNAQ	KCNMB2	SCN7A	SCN2A	SCN3A	KCNJ2	SCN1A
negative regulation of angiogenesis (GO:0016525)	0.12099	0.929177	16	TGFB2	SEMA6A	ROCK2	PDE3B	SEMA3E	KLK3	THBS2	THBS4	MECP2	RGCC	AGO1	COL4A3	KRIT1	PGK1	TEK	HOXA5
mRNA-containing ribonucleoprotein complex export from nucleus (GO:0071427)	0.119182	0.929177	22	NUP205	SMG1	RBM8A	NCBP2	SRSF1	THOC2	MAGOHB	NUP93	DDX19B	ZC3H11A	SARNP	TPR	SRSF2	NUP35	SRSF3	NUP43	SRSF5	RAE1	EIF4E	SLU7	SRSF10	NUP37
protein modification process (GO:0036211)	0.115766	0.929177	19	UBL4A	CHRM3	USP25	ATG3	CSNK1G3	YES1	USP6	ST8SIA2	WDYHV1	FBXO11	FBXW2	LOXL2	SERP1	PPP4R2	QPCT	UBE2N	CPE	ST3GAL6	SEPHS1
regulation of mRNA splicing, via spliceosome (GO:0048024)	0.136913	0.929177	14	DDX17	TIA1	RBFOX1	MBNL2	RBM8A	YTHDC1	SRPK1	SMU1	TRA2B	SRSF3	MBNL3	HNRNPA1	SRSF10	SRSF12
negative regulation of MAPK cascade (GO:0043409)	0.128546	0.929177	18	PSMD10	DUSP3	PAQR3	SPRY4	IRAK3	SORL1	FOXO1	P2RX7	BMP4	RGS2	RPS6KA6	MYC	CNKSR3	NF1	SPRY3	SPRY1	C3ORF33	PTPN2
regulation of JNK cascade (GO:0046328)	0.123899	0.929177	20	APP	PHLPP1	DUSP3	DUSP19	HMGB1	WNT16	TIRAP	EGFR	CTGF	TAOK3	TAOK1	CCR7	RIPK1	AIDA	EPHB1	ZNF675	MAP3K5	ANKRD6	FKTN	DACT1
negative regulation of locomotion (GO:0040013)	0.135257	0.929177	7	TRIM5	CCDC125	SPOCK3	TRIM35	TRIM32	TRIM11	PTPN2
regulation of RNA metabolic process (GO:0051252)	0.12453	0.929177	10	SRRM4	MBNL2	ESRP2	ESRP1	TRA2B	AGGF1	ZNF326	MBNL3	CLK4	AFF2
cellular response to estradiol stimulus (GO:0071392)	0.128889	0.929177	6	MYOG	CRHBP	NRIP1	SSTR2	ESR1	EGFR
cell junction assembly (GO:0034329)	0.123692	0.929177	14	FBLIM1	MYO9A	GRHL2	CDH8	CDH7	TJP1	GJC1	OPHN1	CDH11	DSG1	ITGA6	VCL	CDH18	CDH19
metal ion transport (GO:0030001)	0.128909	0.929177	22	KCNK5	KCNJ10	SLC11A2	KCNJ15	SLC41A1	NEDD4L	ATP1A2	ABCC9	SLC5A1	SLC4A4	ATOX1	SLC9B2	KCNMB1	KCNMB2	SCN7A	FGF13	SCN2A	SCN3A	SLC17A2	KCNJ2	KCNJ3	SCN1A
regulation of gene expression, epigenetic (GO:0040029)	0.119362	0.929177	17	CREBZF	KDM1B	PPM1D	KAT2B	TAF1D	RBBP4	AEBP2	TAF1B	POLR1B	TDG	MTF2	TWISTNB	TAF1A	POLR2F	TRIM27	ERCC6	SF3B1
regulation of protein catabolic process (GO:0042176)	0.134453	0.929177	20	BARD1	NSF	SF3B3	TNFAIP3	NEDD4L	ASB11	IRAK3	IDE	SORL1	OAZ1	FOXO1	EGFR	AZIN1	EEF1A1	APC	HECW1	MDM4	ASB5	TRIM32	DACT1
positive regulation of supramolecular fiber organization (GO:1902905)	0.115766	0.929177	19	SEMA5A	APP	TENM1	BMP10	EDN1	SYNPO2	ALOX15	RHOH	SLAIN2	PROX1	PSEN1	CLU	LMOD2	FER	CFL2	CCR7	MET	COLGALT1	PFN2
positive regulation of protein modification by small protein conjugation or removal (GO:1903322)	0.135024	0.929177	15	PSMD10	PAXIP1	WDR48	ANGPT1	PHF23	XIAP	UBE2D1	UBE3A	BRCA1	RCHY1	PIAS1	TRAF6	UBQLN1	SPRTN	BIRC3
regulation of pathway-restricted SMAD protein phosphorylation (GO:0060393)	0.123692	0.929177	14	ACVR1	GDF11	TGFB2	BMP10	INHBA	LDLRAD4	GDF5	ACVR2A	BMP5	PBLD	BMP4	BMPER	SNX25	BMPR1A
neutrophil mediated immunity (GO:0002446)	0.131385	0.929177	92	CXCL6	ITGAM	ATP8A1	GDI2	LPCAT1	SLC2A3	HMGB1	CTSS	CXCL5	HEBP2	STK10	RAB44	GLIPR1	GM2A	TIMP2	PSMD1	OLR1	ITGAV	CPNE3	CD36	B2M	CD33	CD177	KCMF1	TICAM2	MME	CD93	NHLRC3	APAF1	TUBB	NFAM1	PLAUR	CYBB	ATP11B	ANO6	IRAK4	SCAMP1	EEF1A1	DNAJC3	CLEC4C	ADAM17	RAP2B	RAB37	DSG1	CD47	PPIA
protein targeting (GO:0006605)	0.129801	0.929177	28	RTP4	NLGN1	ZDHHC20	AP4E1	CHM	ZDHHC21	AKAP6	LTBP2	MFF	ZDHHC2	RABGEF1	TIMM17A	MFN2	VTI1B	DNAJC19	ATG3	PRKCI	PEX19	TMEM50A	VPS13C	TMEM50B	RAB3IP	SORL1	ZDHHC14	ZDHHC15	SPCS2	HAP1	OPTN
response to endoplasmic reticulum stress (GO:0034976)	0.126181	0.929177	22	HSPA5	UBA5	ALOX15	SYVN1	ATP2A2	2019-03-06	THBS4	TMCO1	HSP90B1	ERP44	UFL1	TMX4	BCL2L11	TMX3	AIFM1	TMEM33	TMEM117	DNAJC10	BCL2	UBQLN1	DNAJB9	ATF3	MAP3K5
regulation of endothelial cell migration (GO:0010594)	0.12099	0.929177	16	BMP10	EDN1	ANGPT1	ROCK2	ITGB3	PRCP	PROX1	FOXP1	BMP4	BMPER	ATOH8	KRIT1	NF1	TEK	PRKD1	TDGF1
transcription elongation from RNA polymerase II promoter (GO:0006368)	0.121542	0.929177	21	GTF2A1	GTF2A2	SETD2	PBRM1	CCNT2	TAF15	CCNT1	NCBP2	SUPT4H1	ELP2	RTF1	ELP4	MLLT3	AFF4	GTF2F2	GTF2H5	IWS1	POLR2D	POLR2F	TAF4B	TAF3
regulation of Notch signaling pathway (GO:0008593)	0.13297	0.929177	16	TGFB2	PRKCI	MAML2	NRARP	DLL1	EGFR	KAT2B	TSPAN14	HEY1	NOV	BMP2K	AAK1	HIF1AN	CD46	LLGL1	TP63
mRNA export from nucleus (GO:0006406)	0.116828	0.929177	23	NUP205	SMG1	RBM8A	NCBP2	SRSF1	THOC2	MAGOHB	NUP93	DDX19B	ZC3H11A	SARNP	TPR	POLR2D	SRSF2	NUP35	SRSF3	NUP43	SRSF5	RAE1	EIF4E	SLU7	SRSF10	NUP37
regulation of protein ubiquitination (GO:0031396)	0.128909	0.929177	22	PSMD10	ZYG11B	PAXIP1	ANGPT1	PHF23	XIAP	TNFAIP3	UBE2D1	UBE3A	BRCA1	RCHY1	HDAC8	UFL1	GNL3L	TRAF6	CRY1	UBE2N	UBQLN1	SPRTN	SPOPL	N4BP1	BIRC3
regulation of myeloid cell differentiation (GO:0045637)	0.135024	0.929177	15	PRMT6	KMT2A	ASH2L	RUNX1	TNRC6C	PURB	KAT2B	HOXA9	MEIS1	CDK6	AGO3	AGO1	HOXA5	TNRC6A	TNRC6B
protein ubiquitination involved in ubiquitin-dependent protein catabolic process (GO:0042787)	0.13297	0.929177	16	KLHL18	RNF19B	KLHL11	NEDD4L	UBE3A	FBXO45	UBE3B	KLHL24	ABTB2	CUL4A	RNF144A	RNF217	HECW1	SPOP	SPOPL	TRIP12
cellular response to insulin stimulus (GO:0032869)	0.114488	0.929177	24	PRKCI	C2CD5	CAV2	INSR	PDE3B	SYAP1	GAB1	IRS4	IDE	PIK3C2A	FOXO1	RAB10	KAT2B	FER	APC	ENPP1	PHIP	ZNF106	SOS1	CPEB2	ATP6V1C1	PTPN2	ATP6V1C2	APPL1
Golgi organization (GO:0007030)	0.118235	0.929177	26	RAB1A	LMAN2L	UBXN2B	ATL3	ARL1	LMAN1	TMED3	MYO18A	TMED2	TMED5	CLASP2	ARFGEF1	RAB2A	ATP8B3	TICAM2	SURF4	TMED7-TICAM2	GOLGA8J	YWHAZ	GOLGA8N	RAB30	GOLGA6D	PRKD1	OPTN	PI4K2A	GOLGA8A
cell-cell junction assembly (GO:0007043)	0.11761	0.929177	18	PRKCI	PARD6G	GRHL2	CLDN1	CDH8	CDH7	TJP1	GJC1	GJA1	GJB2	APC	CDH11	CD9	DSG1	STRN	VCL	CDH18	CDH19
negative regulation of signal transduction (GO:0009968)	0.114251	0.929177	56	OTUD4	DDR1	PID1	HHIP	TNFAIP3	NRARP	GLI3	CRHBP	RGS2	CYP26B1	HEY1	UBASH3B	GRB10	ENPP1	SOSTDC1	HIF1AN	BTRC	EPHB1	ROS1	EPHB4	PHACTR4	DACT1	EPHB3	ACVR1	EPHA6	MUSK	TSC1	IRAK3	KCTD6	DKK3	SFRP2	CRY1	ROR1	AGTR2	ROR2	MET	LTF	KANK2	LEPROT	EGFR	ERBB3	FRZB	KCTD21	BRAP	RYK	INSR
cellular response to starvation (GO:0009267)	0.135971	0.929177	23	SH3GLB1	KLF10	PRKAA1	PRKAA2	WDR59	HSPA5	EIF2AK2	FOXO1	RRP8	C12ORF66	DAP	IMPACT	STK24	RRAGD	MAPK1	FAS	PIK3C3	PRKD1	HNRNPA1	RNF152	MAP3K5	ATG5	CPEB4
positive regulation of macromolecule metabolic process (GO:0010604)	0.137612	0.929177	54	APP	CNTF	PID1	PTPN22	PIK3CB	BRCA1	CLU	HMGN5	MYC	ITGB8	CD36	GABPA	NSF	MUSK	SERPINB9	PAX6	SOX11	ANK3	WNT16	POU3F3	PLSCR1	IFNG	TBC1D5	TLR6	CD46	TLR3	CRP	MTPN	PRKAA1	ROCK2	HPN	PDGFB	TWIST1	HIF1A	PPM1F	MAPK9	AGR2	MAPK1	TFAP2A	ANGPT1	EPHX2	RDX	RAB27A	HMGA2	INHBA	MAPK14
ubiquitin-dependent protein catabolic process (GO:0006511)	0.128642	0.929177	66	RNF11	UBXN2B	KIF14	OTUD7B	RNF19B	TNFAIP3	UBE2D1	UBE3A	UBE3B	PSMD1	BTRC	RNF111	RNF44	NHLRC3	USP44	FBXO11	KCTD6	RNF144A	UBE2R2	RNF128	TBL1XR1	HECW1	SPOPL	ANAPC1	BIRC2	KLHL18	PSMD10	UBA6	KLHL15	RNF38	VPS4A	UBR3	KLHL11	NEDD4L	FBXO45	RCHY1	CBL	C18ORF25	RNF213	KCTD21	UBD	HECTD4	RNF217	SPOP	RFFL	RNF20
mRNA transcription from RNA polymerase II promoter (GO:0042789)	0.14505	0.930337	5	MYOG	TFCP2	C5AR1	ZBTB1	HIF1A
regulation of stem cell proliferation (GO:0072091)	0.14505	0.930337	5	YAP1	AGO3	HMGA2	EIF2AK2	SOX11
hexose transport (GO:0008645)	0.14505	0.930337	5	SLC2A9	SLC2A10	SLC2A13	SLC2A12	SLC5A1
peptidyl-threonine dephosphorylation (GO:0035970)	0.14505	0.930337	5	PPM1A	DUSP18	PPM1D	PPM1E	PPM1F
regulation of SMAD protein import into nucleus (GO:0060390)	0.14505	0.930337	5	NUP93	BMP4	NOV	PBLD	BMPR1A
cardiac epithelial to mesenchymal transition (GO:0060317)	0.14505	0.930337	5	HEYL	TGFB2	HEY1	HAS2	SPRY1
leukocyte adhesion to vascular endothelial cell (GO:0061756)	0.14505	0.930337	5	ITGB1	SELPLG	VCAM1	GCNT1	MADCAM1
programmed necrotic cell death (GO:0097300)	0.14505	0.930337	5	TICAM2	TRPM7	RIPK1	ALKBH7	TLR3
regulation of intrinsic apoptotic signaling pathway in response to DNA damage (GO:1902229)	0.14505	0.930337	5	SFRP2	SNAI1	ACKR3	TRIM32	CLU
leukocyte tethering or rolling (GO:0050901)	0.14505	0.930337	5	ITGB1	SELPLG	VCAM1	GCNT1	MADCAM1
negative regulation of striated muscle cell differentiation (GO:0051154)	0.14505	0.930337	5	NOV	BDNF	BHLHE41	FRS2	SOX6
activation of NF-kappaB-inducing kinase activity (GO:0007250)	0.14505	0.930337	5	TRAF6	TLR6	MAP3K7	TLR3	TIRAP
negative regulation of steroid biosynthetic process (GO:0010894)	0.14505	0.930337	5	SNAI1	ERLIN1	PROX1	ERLIN2	BMP5
regulation of toll-like receptor 4 signaling pathway (GO:0034143)	0.14505	0.930337	5	TICAM2	TNFAIP3	PTPN22	TIRAP	LTF
negative regulation of lipid storage (GO:0010888)	0.14505	0.930337	5	CRP	OSBPL8	ITGB3	ITGAV	PTPN2
positive regulation of NIK/NF-kappaB signaling (GO:1901224)	0.140598	0.930337	9	APP	TRAF6	EIF2AK2	TLR6	MAP3K7	TRIM44	TLR3	TIRAP	EGFR
double-strand break repair via homologous recombination (GO:0000724)	0.142845	0.930337	17	GEN1	MCM9	GINS4	NSMCE2	RPA1	NUCKS1	LIG3	BRCA1	RAD54B	YY1	MMS22L	SFPQ	NIPBL	UBE2N	RBBP8	NABP1	POLK
intraciliary transport involved in cilium assembly (GO:0035735)	0.14114	0.930337	10	DYNC2LI1	IFT74	KIF3A	TTC21B	TRIP11	IFT80	TNPO1	SSX2IP	DYNLL2	WDR35
regulation of cardiac muscle contraction (GO:0055117)	0.140598	0.930337	9	HCN4	RGS2	BMP10	PLN	ATP2A2	CALM3	CALM1	PIK3CG	SLC8A1
regulation of necroptotic process (GO:0060544)	0.14505	0.930337	5	RIPK1	SLC25A4	YBX3	BIRC2	BIRC3
androgen receptor signaling pathway (GO:0030521)	0.14114	0.930337	10	NCOA1	DDX17	GRIP1	MED13	NRIP1	BRCA1	MED4	PPARGC1A	PIAS2	PIAS1
regulation of protein dephosphorylation (GO:0035304)	0.14114	0.930337	10	ANKLE2	PPP1R14B	DLC1	CNEP1R1	PPP6R3	TSC1	CALM3	CALM1	ARPP19	HSP90B1
regulation of sodium ion transport (GO:0002028)	0.140598	0.930337	9	P2RX7	NKAIN3	SLMAP	CNKSR3	WNK3	ATP2B4	SIK1	ANK3	FGF12
ameboidal-type cell migration (GO:0001667)	0.14114	0.930337	10	SEMA4A	SEMA3C	NOV	SEMA4C	SEMA3E	SEMA4F	AMOTL1	SRGAP2	PHACTR4	CORO1C
protein localization to organelle (GO:0033365)	0.142276	0.930337	20	TIA1	TMEM30A	PAQR3	RPA1	ARL1	SIX1	BICD1	SORL1	WDR35	2019-03-05	TOR1AIP1	BICD2	RAB33B	BMP4	PIKFYVE	ACAP2	SIX4	TTC21B	CNEP1R1	RAB6A	OPTN
positive regulation of JNK cascade (GO:0046330)	0.142845	0.930337	17	APP	EDN1	DUSP19	HMGB1	WNT16	TIRAP	CTGF	TAOK3	TRAF6	TAOK1	CCR7	RIPK1	TLR6	MAP3K7	ARHGEF5	MAP3K5	ANKRD6
cellular response to organonitrogen compound (GO:0071417)	0.142276	0.930337	21	GABRB3	HCN4	GABRB2	GABRB1	AKAP6	BRCA1	AHR	PKD2	TSHR	SSH1	HSP90B1	MAPK13	CRHBP	IMPACT	RRAGD	CAPN2	RAPGEF2	SLC38A9	CPEB3	CPEB4	HCN1
regulation of intracellular signal transduction (GO:1902531)	0.143065	0.930337	80	BMP10	FAM13B	PHF20	PAK1IP1	GDI2	PTPN22	BRCA1	ING5	AKAP13	AKAP11	OPHN1	CHEK1	TOPBP1	ROS1	C3ORF58	TP63	CMKLR1	ARHGEF12	ENTPD5	RHOH	TMBIM4	KAT6A	KCTD11	DNA2	SOS1	OPTN	ARHGEF5	BIRC2	BIRC3	ARHGEF6	NLGN1	HDAC2	PRKAA1	PHLPP1	PRKAA2	XIAP	AKAP6	GNAI1	EGFR	ARHGAP12	PKHD1	ARHGAP20	RHOT1	RBBP4	CHN1	SMYD2
negative regulation of extrinsic apoptotic signaling pathway (GO:2001237)	0.142845	0.930337	17	ACVR1	EYA1	FGG	EYA4	TNFAIP3	FAIM2	BRCA1	SH3RF1	BMP5	BMP4	BCL2	FAS	ITGAV	ITGA6	PHIP	RIPK1	RFFL
regulation of cell migration (GO:0030334)	0.14455	0.930337	61	BMP10	MCTP1	KIF14	LDLRAD4	RND2	RND3	CYR61	MYLK	ROBO1	FAM110C	DPYSL3	CYP1B1	CPNE3	ACVR1	EDN1	F2R	ADAM17	SFRP2	ANGPTL3	SGK3	ITGA6	ROR2	VCL	SEMA3C	PDGFB	NEXN	SEMA3E	EGFR	TTBK2	CORO1C	PDGFC	GCNT2	HAS2	ZNF304	SRGAP3	SRGAP2	RFFL	SCAI	ARSB	PLXNA3	RNF20	SEMA4A	HSPA5	RCC2	INSR	SEMA4C
nuclear export (GO:0051168)	0.145513	0.93201	20	CRB1	RANBP3	RBM8A	NCBP2	SRSF1	THOC2	MAGOHB	NPAP1	ATXN1	XPO4	ZC3H11A	SARNP	TPR	SRSF2	SRSF3	SRSF5	HNRNPA1	RAE1	EIF4E	SLU7
nucleotide phosphorylation (GO:0046939)	0.183011	0.951739	3	CMPK1	CMPK2	AK4
doxorubicin metabolic process (GO:0044598)	0.183011	0.951739	3	AKR1C2	AKR1C4	CBR4
nodal signaling pathway (GO:0038092)	0.183011	0.951739	3	SMAD2	ACVR1C	TDGF1
protein import into peroxisome matrix (GO:0016558)	0.16327	0.951739	4	PEX5L	PEX2	PEX13	PEX26
positive regulation of IRE1-mediated unfolded protein response (GO:1903896)	0.183011	0.951739	3	BCL2L11	TMEM33	AGR2
actin filament network formation (GO:0051639)	0.183011	0.951739	3	COBLL1	ACTN1	COBL
regulation of skeletal muscle tissue development (GO:0048641)	0.16327	0.951739	4	DDX17	UQCC2	NR1D2	DLL1
negative regulation of calcium ion transmembrane transport (GO:1903170)	0.183011	0.951739	3	PLN	SESTD1	ATP1A2
diol biosynthetic process (GO:0034312)	0.183011	0.951739	3	ASAH2B	ASAH2	ACER3
insulin metabolic process (GO:1901142)	0.183011	0.951739	3	CPD	CPE	IDE
response to interleukin-6 (GO:0070741)	0.16327	0.951739	4	SELPLG	PID1	ST3GAL6	TDGF1
vasoconstriction (GO:0042310)	0.16327	0.951739	4	EDNRA	EDN1	PIK3C2A	SLC8A1
positive regulation of mRNA 3'-end processing (GO:0031442)	0.183011	0.951739	3	NUDT21	NCBP2	CPEB3
sphingosine biosynthetic process (GO:0046512)	0.183011	0.951739	3	ASAH2B	ASAH2	ACER3
aminoglycoside antibiotic metabolic process (GO:0030647)	0.183011	0.951739	3	AKR1C2	AKR1C4	CBR4
negative regulation of glucose import (GO:0046325)	0.183011	0.951739	3	PID1	GRB10	ENPP1
negative regulation of bone remodeling (GO:0046851)	0.183011	0.951739	3	P2RX7	UBASH3B	TNFAIP3
sulfur amino acid catabolic process (GO:0000098)	0.183011	0.951739	3	CTH	ADO	PCYOX1
nucleoside diphosphate phosphorylation (GO:0006165)	0.183011	0.951739	3	CMPK1	CMPK2	AK4
positive regulation of extracellular matrix assembly (GO:1901203)	0.183011	0.951739	3	RGCC	PHLDB2	CLASP2
negative regulation of centriole replication (GO:0046600)	0.183011	0.951739	3	KAT2B	TRIM37	BRCA1
daunorubicin metabolic process (GO:0044597)	0.183011	0.951739	3	AKR1C2	AKR1C4	CBR4
pyrimidine nucleobase metabolic process (GO:0006206)	0.183011	0.951739	3	ALDH6A1	DPYD	UPRT
inositol phosphate catabolic process (GO:0071545)	0.183011	0.951739	3	INPP5A	INPP1	NUDT3
histone H4 deacetylation (GO:0070933)	0.183011	0.951739	3	HDAC2	SMARCAD1	RCOR1
cell junction maintenance (GO:0034331)	0.183011	0.951739	3	NLGN2	F2R	CD177
alternative mRNA splicing, via spliceosome (GO:0000380)	0.16327	0.951739	4	DDX17	SFPQ	SRSF1	SLU7
mRNA transcription (GO:0009299)	0.153284	0.951739	6	MYOG	TFCP2	C5AR1	ZBTB1	HIF1A	HIPK3
positive regulation of cAMP-mediated signaling (GO:0043950)	0.183011	0.951739	3	CXCL10	RAPGEF2	GPR61
regulation of toll-like receptor 2 signaling pathway (GO:0034135)	0.183011	0.951739	3	TNFAIP3	TLR6	TIRAP
negative regulation of mRNA polyadenylation (GO:1900364)	0.183011	0.951739	3	RNF20	CCNT1	ZC3H14
positive regulation of vasculogenesis (GO:2001214)	0.183011	0.951739	3	RAPGEF2	ASB4	HIF1AN
positive regulation of stem cell proliferation (GO:2000648)	0.174495	0.951739	5	FZD3	HMGA2	SOX11	LTBP2	DISC1
zinc II ion transport (GO:0006829)	0.153284	0.951739	6	SLC30A6	SLC30A9	SLC30A8	SLC30A5	SLC39A6	SLC39A14
cellular response to prostaglandin E stimulus (GO:0071380)	0.183011	0.951739	3	PTGER4	GNG2	TNFSF4
serine family amino acid biosynthetic process (GO:0009070)	0.16327	0.951739	4	CTH	SEPHS1	SEPHS2	PSPH
cardiac atrium morphogenesis (GO:0003209)	0.174495	0.951739	5	NOTCH2	TGFB2	BMP10	TBX20	PROX1
dimeric G-protein coupled receptor signaling pathway (GO:0038042)	0.183011	0.951739	3	CALCRL	IAPP	GRM1
regulation of protein localization to cell periphery (GO:1904375)	0.16327	0.951739	4	VPS4A	STX7	VTI1B	APPL1
positive regulation of BMP signaling pathway (GO:0030513)	0.153284	0.951739	6	BMP4	SMAD2	SOX11	ZNF423	GDF5	CYR61
protein insertion into mitochondrial membrane (GO:0051204)	0.183011	0.951739	3	MOAP1	BCL2L11	COX18
peptidyl-cysteine modification (GO:0018198)	0.183011	0.951739	3	PRDX3	TMX3	RAB6A
negative regulation of fibroblast growth factor receptor signaling pathway (GO:0040037)	0.16327	0.951739	4	SPRY4	SPRY3	SPRY1	SULF2
response to prostaglandin E (GO:0034695)	0.16327	0.951739	4	PTGER4	GNG2	TNFSF4	CCR7
negative regulation of stress fiber assembly (GO:0051497)	0.174495	0.951739	5	DLC1	WASF2	MET	PHLDB2	CLASP2
stress-induced premature senescence (GO:0090400)	0.183011	0.951739	3	PLA2R1	WNT16	MAPK14
cellular response to nitric oxide (GO:0071732)	0.183011	0.951739	3	KCNC2	MTR	FOXO1
positive regulation of neuron migration (GO:2001224)	0.16327	0.951739	4	NIPBL	ZNF609	SEMA6A	RAPGEF2
axonal fasciculation (GO:0007413)	0.16327	0.951739	4	SEMA5A	NRCAM	CNTN4	EPHB3
excitatory synapse assembly (GO:1904861)	0.183011	0.951739	3	NLGN1	GRID2	SHANK2
cellular monovalent inorganic anion homeostasis (GO:0030320)	0.183011	0.951739	3	ENPP1	GPCPD1	XPR1
regulation of vasculogenesis (GO:2001212)	0.16327	0.951739	4	HEY1	RAPGEF2	ASB4	HIF1AN
endosome transport via multivesicular body sorting pathway (GO:0032509)	0.16327	0.951739	4	LEPROT	TMEM50A	LEPROTL1	TMEM50B
regulation of actomyosin structure organization (GO:0110020)	0.16327	0.951739	4	PTGER4	AKAP13	ROCK2	TSC1
amyloid fibril formation (GO:1990000)	0.183011	0.951739	3	APP	RIPK1	CD36
macrophage activation (GO:0042116)	0.174495	0.951739	5	ITGAM	CD93	FPR2	CLU	FOXP1
lagging strand elongation (GO:0006273)	0.183011	0.951739	3	LIG4	LIG3	DNA2
regulation of PERK-mediated unfolded protein response (GO:1903897)	0.183011	0.951739	3	HSPA5	TMEM33	AGR2
pharyngeal system development (GO:0060037)	0.174495	0.951739	5	BMP4	TGFB2	SIX4	BMP5	BMPR1A
cellular response to reactive nitrogen species (GO:1902170)	0.183011	0.951739	3	KCNC2	MTR	FOXO1
regulation of protein glycosylation (GO:0060049)	0.16327	0.951739	4	KAT2B	IFNG	ALG10B	FKTN
negative regulation of activated T cell proliferation (GO:0046007)	0.183011	0.951739	3	BTN2A2	PRKAR1A	RC3H1
prostanoid metabolic process (GO:0006692)	0.16327	0.951739	4	ACOX1	AKR1C2	AKR1C4	PTGR2
positive regulation of interferon-beta production (GO:0032728)	0.157494	0.951739	7	TBK1	POLR3A	POLR3D	POLR3F	TLR8	POLR3G	TLR3
regulation of vascular associated smooth muscle cell migration (GO:1904752)	0.183011	0.951739	3	DOCK5	PDGFB	PRKG1
nose development (GO:0043584)	0.183011	0.951739	3	SIX4	PROX1	GLI3
positive regulation of histone acetylation (GO:0035066)	0.153284	0.951739	6	RPS6KA5	PAXIP1	TADA2A	BRCA1	BRD7	PPARGC1A
negative regulation of myoblast differentiation (GO:0045662)	0.16327	0.951739	4	BMP4	SOSTDC1	DLL1	EID2B
positive regulation of interleukin-10 production (GO:0032733)	0.179532	0.951739	6	TSLP	IL23A	IRF4	TNFSF4	HMGB1	CD46
limb morphogenesis (GO:0035108)	0.153284	0.951739	6	TGFB2	CYP26B1	NIPBL	ZNF141	GLI3	LRP6
positive regulation of behavior (GO:0048520)	0.183011	0.951739	3	NLGN1	SGIP1	INSL5
gastrulation (GO:0007369)	0.174495	0.951739	5	EOMES	SMAD2	MKKS	NPHP3	LRP6
positive regulation of granulocyte chemotaxis (GO:0071624)	0.157494	0.951739	7	CXCL6	CAMK1D	CCR7	PPBP	CXCL5	TIRAP	THBS4
vesicle budding from membrane (GO:0006900)	0.16327	0.951739	4	ATP8A1	VPS4A	MYO18A	FNBP1L
positive regulation of stem cell differentiation (GO:2000738)	0.16327	0.951739	4	TGFB2	LTBP2	SOX6	SOX5
regulation of collagen biosynthetic process (GO:0032965)	0.174495	0.951739	5	BMP4	HDAC2	RGCC	F2R	F2
apoptotic cell clearance (GO:0043277)	0.157494	0.951739	7	FCN2	TMX3	ITGB3	ALOX15	RHOH	ITGAV	HMGB1
polyol biosynthetic process (GO:0046173)	0.183011	0.951739	3	PPIP5K2	ACER3	FGF2
negative regulation of myeloid cell differentiation (GO:0045638)	0.179532	0.951739	6	HOXA9	ZFP36	MEIS1	MAFB	CDK6	HOXA5
kidney mesenchyme development (GO:0072074)	0.183011	0.951739	3	SIX4	SIX1	PKD2
ERK1 and ERK2 cascade (GO:0070371)	0.153284	0.951739	6	PTGER4	MYC	MAPK1	ITGAV	ZFP36L2	FGF10
regulation of cardiac muscle cell action potential involved in regulation of contraction (GO:0098909)	0.183011	0.951739	3	HCN4	ATP2A2	FGF13
phenol-containing compound biosynthetic process (GO:0046189)	0.183011	0.951739	3	DCT	TRPC1	TYRP1
vesicle-mediated transport to the plasma membrane (GO:0098876)	0.159295	0.951739	8	RAB10	VPS29	CHIC2	SNX27	EXOC6	ANKRD50	STEAP2	LLGL1
DNA damage induced protein phosphorylation (GO:0006975)	0.183011	0.951739	3	CHEK1	CRY1	MAP2K6
cytoskeleton-dependent intracellular transport (GO:0030705)	0.157494	0.951739	7	MYO10	KIF5C	TUBB	KIF5B	KIF14	KIF1C	DYNLL2
endosome organization (GO:0007032)	0.159569	0.951739	9	USP8	EXOC8	AKTIP	CHMP2B	RAB27A	DNAJC13	CLCN3	RAB22A	PI4K2A
mRNA cis splicing, via spliceosome (GO:0045292)	0.174495	0.951739	5	NCBP2	SRSF1	WBP11	RBM22	SRSF12
regulation of protein autophosphorylation (GO:0031952)	0.159295	0.951739	8	MOB1B	IMPACT	PDGFC	NEK10	PDGFB	ENPP1	CALM3	CALM1
regulation of muscle organ development (GO:0048634)	0.183011	0.951739	3	MTPN	CENPF	SFMBT1
negative regulation of DNA damage response, signal transduction by p53 class mediator (GO:0043518)	0.16327	0.951739	4	PSMD10	SNAI1	TWIST1	CD44
regulation of establishment or maintenance of cell polarity (GO:0032878)	0.174495	0.951739	5	ARFGEF1	ROCK2	KRIT1	TEK	LLGL1
positive regulation of cartilage development (GO:0061036)	0.174495	0.951739	5	BMP4	SOX6	GDF5	SOX5	LOXL2
negative regulation of lipid biosynthetic process (GO:0051055)	0.174495	0.951739	5	ERLIN1	SIK1	ERLIN2	BRCA1	BMP5
regulation of protein export from nucleus (GO:0046825)	0.159295	0.951739	8	BARD1	SETD2	XPO4	TPR	PTPN14	IWS1	UHMK1	RBM22
negative regulation of extrinsic apoptotic signaling pathway via death domain receptors (GO:1902042)	0.159295	0.951739	8	FGG	TNFAIP3	FAS	FAIM2	RIPK1	BRCA1	RFFL	BMP5
histone deacetylation (GO:0016575)	0.159569	0.951739	9	SFPQ	HDAC2	SIN3B	TBL1XR1	BRMS1L	PRDM5	SMARCAD1	MSL3	RCOR1
cellular response to glucocorticoid stimulus (GO:0071385)	0.174495	0.951739	5	ZFP36	BCL2L11	NR3C1	SSTR2	ZFP36L2
peptidyl-lysine monomethylation (GO:0018026)	0.183011	0.951739	3	SETD2	SETD7	SMYD2
nuclear envelope disassembly (GO:0051081)	0.157418	0.951739	11	NUP93	CCNB2	NEK9	NUP205	CNEP1R1	TPR	NUP35	NUP43	LPIN1	RAE1	NUP37
calcium ion transmembrane import into cytosol (GO:0097553)	0.159569	0.951739	9	GRIN2A	F2R	ATP2B4	HTR2C	CCR7	PKD2	FGF2	GRIN2B	CHERP
synaptic transmission, glutamatergic (GO:0035249)	0.153284	0.951739	6	UNC13B	GRIA2	UNC13C	GRID2	GRID1	CDH8
regulation of receptor-mediated endocytosis (GO:0048259)	0.159569	0.951739	9	HNRNPK	SGIP1	BMP2K	AAK1	PIK3CB	CBL	B2M	BICD1	CLU
membrane depolarization during cardiac muscle cell action potential (GO:0086012)	0.174495	0.951739	5	HCN4	CACNB2	ATP1A2	KCNJ2	SLC8A1
regulation of bone resorption (GO:0045124)	0.179532	0.951739	6	P2RX7	UBASH3B	ITGB3	S1PR1	NF1	TNFAIP3
positive regulation of smooth muscle cell proliferation (GO:0048661)	0.179693	0.951739	9	BMP4	EDN1	FGF9	PDGFB	MFN2	FGF2	NOX1	FOXP1	BMPR1A
regulation of cytokine secretion (GO:0050707)	0.159295	0.951739	8	CRP	PTGER4	RGCC	CADM1	BTN2A2	C5AR2	LGR4	FOXP1
G2 DNA damage checkpoint (GO:0031572)	0.181072	0.951739	8	TAOK3	TAOK1	CHEK1	DONSON	RBBP8	HMGA2	TOPBP1	BRCA1
cellular monovalent inorganic cation homeostasis (GO:0030004)	0.174495	0.951739	5	ATP1B4	NEDD4L	ATP1A2	KCNJ2	SLC8A1
mitotic G2 DNA damage checkpoint (GO:0007095)	0.174495	0.951739	5	TAOK3	TAOK1	DONSON	HMGA2	TOPBP1
positive chemotaxis (GO:0050918)	0.174495	0.951739	5	SEMA5A	ANGPT1	FPR2	MET	FGF10
epidermal growth factor receptor signaling pathway (GO:0007173)	0.16885	0.951739	13	SHC3	GAB1	PIK3C2A	CBL	EGFR	NRAS	ADAM17	RPS6KA5	EFEMP1	KRAS	SOS1	PAG1	FAM83B
organic hydroxy compound transport (GO:0015850)	0.159569	0.951739	9	NCOA1	NCOA2	SLC10A6	SLC10A2	POLR2D	SLCO1B3	SLCO1A2	AKR1C4	ABCB11
positive regulation of gene expression, epigenetic (GO:0045815)	0.174936	0.951739	11	KAT2B	TAF1D	TAF1B	POLR1B	CHEK1	TWISTNB	TAF1A	POLR2F	ERCC6	SF3B1	ASF1A
mitochondrial tRNA modification (GO:0070900)	0.183011	0.951739	3	TRMT10C	TRMT5	TRMT61B
mRNA polyadenylation (GO:0006378)	0.181265	0.951739	7	NUDT21	APP	CPSF6	SSU72	PAPOLB	PABPC1	GRSF1
negative regulation of antigen receptor-mediated signaling pathway (GO:0050858)	0.174495	0.951739	5	DUSP3	FCRL3	LPXN	PTPN22	PTPN2
cellular response to glucose stimulus (GO:0071333)	0.181265	0.951739	7	UNC13B	PTPRN2	KCNB1	TRA2B	PDK3	RAB11FIP2	ZNF236
positive regulation of protein transport (GO:0051222)	0.153319	0.951739	13	UNC13B	TENM1	TGFB2	FGG	OAZ1	CNST	TPR	MYO18A	ANG	MYH10	PPIA	ARHGEF5	EXPH5
modulation by host of viral transcription (GO:0043921)	0.181265	0.951739	7	CCNT1	SP1	HPN	HMGA2	NUCKS1	TARDBP	CHD1
positive regulation of DNA metabolic process (GO:0051054)	0.152129	0.951739	18	OTUD4	EYA1	INSR	ATRX	EYA4	PDGFB	HMGB1	BRCA1	EGFR	MECP2	RGCC	MYC	PDGFC	DHX36	UBE2N	ZNF304	DNA2	FGF10
positive regulation of viral transcription (GO:0050434)	0.158834	0.951739	10	MDFIC	CCNT1	SP1	HPN	POLR2D	SUPT4H1	POLR2F	NUCKS1	GTF2F2	CHD1
aminoglycan catabolic process (GO:0006026)	0.181072	0.951739	8	SDC2	CHI3L2	IDS	GPC5	GPC4	CTBS	GNS	GPC6
negative regulation of G0 to G1 transition (GO:0070317)	0.179693	0.951739	9	TFDP1	CBX5	RBBP4	TFDP2	APAF1	CHEK1	RBBP8	BRCA1	RNF2
regulation of calcium ion transport (GO:0051924)	0.171995	0.951739	12	CACNB2	PLN	STIM2	HOMER2	FCRL3	F2R	WNK3	BCL2	IL16	PKD2	CAMK2G	MYLK
epithelial to mesenchymal transition (GO:0001837)	0.179693	0.951739	9	EOMES	DDX17	HEYL	TGFB2	HEY1	SNAI1	HMGA2	HIF1A	LOXL2
regulation of MAP kinase activity (GO:0043405)	0.1488	0.951739	19	TENM1	CD40	EDN1	PAQR3	SPRY4	PDGFB	IRAK3	FGF2	SORL1	EGFR	PIK3CG	ROBO1	BMP4	RGS2	PDGFC	NF1	NEK10	SPRY3	SPRY1
NLS-bearing protein import into nucleus (GO:0006607)	0.179532	0.951739	6	TRPS1	NUP35	KPNA4	TNPO1	RANBP6	KPNB1
negative regulation of calcium ion transmembrane transporter activity (GO:1901020)	0.181072	0.951739	8	OR5T1	PLN	UBQLN1	ATP1A2	CALM3	PKD2	CALM1	TRDN
phospholipid biosynthetic process (GO:0008654)	0.179693	0.951739	9	NUS1	IDI1	DGKE	SAMD8	NDUFAB1	LPCAT1	CPNE3	SGMS2	AGPAT4
regulation of glycolytic process (GO:0006110)	0.16885	0.951739	13	NUP205	PRKAA1	PRKAA2	ENTPD5	INSR	HIF1A	P2RX7	NUP93	TPR	NUP35	NUP43	RAE1	NUP37
positive regulation of receptor activity (GO:2000273)	0.179693	0.951739	9	ITGB1	ADAM17	CALM3	AKAP6	HAP1	PKD2	CALM1	ALG10B	TRDN
positive regulation of phosphatase activity (GO:0010922)	0.179532	0.951739	6	IFNG	MTMR9	CALM3	AKAP6	AGTR2	CALM1
regulation of translational initiation (GO:0006446)	0.165579	0.951739	14	KHDRBS1	NCBP2	DAZ3	UHMK1	DNAJC3	DAZL	PAIP2B	IMPACT	ALKBH1	TPR	POLR2D	EIF4EBP2	EIF3H	PAIP2
base-excision repair (GO:0006284)	0.179693	0.951739	9	PRMT6	TDG	RPA1	HMGA2	LIG3	DNA2	POLK	ERCC6	CCNO
positive regulation of cell cycle (GO:0045787)	0.152129	0.951739	18	ANKRD17	PSMD10	APP	TGFB2	CCNT2	DUSP3	CCNT1	PDGFB	CCNC	PROX1	PHOX2B	LRP6	HMGN5	CCPG1	CHEK1	EIF4E	TRIM32	FGF10
regulation of T cell migration (GO:2000404)	0.174495	0.951739	5	CXCL10	APP	LRCH1	CCL20	DOCK8
glycosaminoglycan metabolic process (GO:0030203)	0.150882	0.951739	14	HS3ST3A1	SDC2	XYLT1	B3GALT6	GNS	HS6ST2	HS2ST1	EXT2	VCAN	GCNT2	IDS	GPC5	GPC4	GPC6
negative regulation of I-kappaB kinase/NF-kappaB signaling (GO:0043124)	0.174936	0.951739	11	PSMD10	PPM1A	NOV	G3BP2	OTUD7B	RHOH	TNFAIP3	TRIM59	RORA	RIPK1	ESR1
protein targeting to vacuole (GO:0006623)	0.181265	0.951739	7	SCARB2	TMEM50A	VPS13C	TMEM50B	VPS4A	SORL1	VTI1B
positive regulation of calcium ion transport into cytosol (GO:0010524)	0.181072	0.951739	8	P2RX7	CXCL10	TRPC3	TRPC1	F2R	APLNR	AKAP6	F2
negative regulation of autophagy (GO:0010507)	0.157418	0.951739	11	DAP	BCL2	ZKSCAN3	WDR6	TAB3	MTMR9	TSC1	PTPN22	SMCR8	ZKSCAN4	MET
positive regulation by host of viral transcription (GO:0043923)	0.174495	0.951739	5	CCNT1	SP1	HPN	NUCKS1	CHD1
ceramide biosynthetic process (GO:0046513)	0.181072	0.951739	8	CERS3	CERS4	SAMD8	CERS6	ST8SIA2	SGMS2	SPTSSA	B4GALT6
regulation of TOR signaling (GO:0032006)	0.162238	0.951739	15	DYRK3	PRKAA1	PRKAA2	WDR59	TSC1	UBR1	PREX2	PKHD1	TBCK	DEPTOR	RRAGD	SMCR8	SLC38A9	RFFL	ROS1
positive regulation of protein secretion (GO:0050714)	0.152129	0.951739	18	UNC13B	PTGER4	TGFB2	NLGN2	SLC30A8	CADM1	FGG	TRH	TM7SF3	RGCC	TNFSF4	POLR2D	MYO18A	ANG	MYH10	PPIA	MCU	EXPH5
response to metal ion (GO:0010038)	0.158865	0.951739	16	SLC30A6	SLC30A8	TRPC3	TRPC1	SLC30A5	FGG	SLC11A2	ANXA11	NEDD4L	HIF1A	LOXL2	MT1A	BCL2	CALM3	SLC25A12	CALM1
activation of GTPase activity (GO:0090630)	0.177914	0.951739	18	TBC1D8B	RABGAP1L	USP6	RALGAPA2	GPR65	CCDC125	TBC1D9	TSC1	TBC1D2B	CXCL13	CORO1C	TBCK	TBC1D1	SIPA1L1	RALGAPB	TBC1D5	TBC1D30	CCR7
protein homooligomerization (GO:0051260)	0.152809	0.951739	38	TRIM72	NLGN1	USP16	ATL3	KCNC2	RASEF	ITLN1	ZBTB1	IDE	MFF	PKD2	CLDN1	GLS	CRYZ	SCUBE3	SCUBE1	RNF213	DPYSL3	SMARCAD1	RIPK1	POLK	VSTM5	CBR4	KCNJ2	TP63	TYSND1	SOD2	ALDH1A3	EHD4	ALDH5A1	APC	CTH	ALOX5AP	IAPP	TMCC1	HPRT1	TRMT61B	HCN1
aminoglycan biosynthetic process (GO:0006023)	0.157418	0.951739	11	EXT2	HS3ST3A1	SDC2	GCNT2	XYLT1	B3GALT6	GPC5	GPC4	GPC6	HS6ST2	HS2ST1
chromatin remodeling (GO:0006338)	0.174685	0.951739	24	SMARCE1	SMARCC1	HDAC2	PBRM1	ATRX	SUPT4H1	ZBTB1	MSL3	HMGA2	HMGB1	MYSM1	ESR1	SMARCA2	CECR2	TOX3	KAT2B	TADA2A	RBBP4	MYC	CHEK1	ANP32E	TFAM	SMARCAD1	SP140L
glycosaminoglycan biosynthetic process (GO:0006024)	0.164906	0.951739	21	CHST6	HS3ST3A1	ANGPT1	SDC2	XYLT1	B3GALT6	KERA	HS6ST2	HS2ST1	EXT2	VCAN	DSEL	DSE	GCNT2	HAS2	GPC5	ST3GAL6	CHSY3	GPC4	B4GALT6	GPC6
protein oligomerization (GO:0051259)	0.149199	0.951739	43	TRIM72	KHDRBS1	NLGN1	NUFIP1	ATL3	KCNC2	RASEF	ZBTB1	TNFAIP3	IKZF1	IDE	MFF	CLDN1	SCUBE3	SCUBE1	SNX2	RNF213	TRPS1	TRA2B	DPYSL3	SMARCAD1	RIPK1	POLK	TRIM27	EPPIN	STX2	CAMK2G	VSTM5	AASS	TRIM22	SH3GLB1	ADSL	CPSF7	CPSF6	TYSND1	NUDT21	EHD4	APC	YME1L1	IAPP	TEK	TMCC1	TRMT61B
regulation of viral genome replication (GO:0045069)	0.180977	0.951739	14	TOP2A	IFIT5	EIF2AK2	PROX1	IFIT1	TARBP2	SRPK1	PLSCR1	NR5A2	CNOT7	PDE12	PABPC1	PPIA	LTF
protein homotetramerization (GO:0051289)	0.16885	0.951739	13	USP16	PKD2	SOD2	GLS	CRYZ	ALDH1A3	ALDH5A1	CTH	HPRT1	CBR4	KCNJ2	TP63	HCN1
chloride transport (GO:0006821)	0.172748	0.951739	16	GABRA2	GABRB3	GABRB2	GABRA1	CLIC5	GABRB1	GABRA4	SLC12A1	GABRA3	SLC1A1	ANO6	CLCN3	CLCN5	CLCN4	SLC26A7	SLC26A9
regulation of metal ion transport (GO:0010959)	0.179693	0.951739	9	P2RX7	OR5T1	NKAIN3	PLN	BCL2	SIK1	IL16	ANK3	CAMK2G
regulation of cell differentiation (GO:0045595)	0.170135	0.951739	25	DLX1	DLL1	CTGF	PURB	RPS6KA3	HEY1	TRPS1	JUNB	CLASP2	DDX17	TFAP2A	UQCC2	EIF2AK2	NR1D2	PA2G4	RUNX2	RUNX1	BMP4	CDK6	APC	BCL6B	OCIAD1	SIK1	PHLDB2	BIRC2
regulation of signal transduction by p53 class mediator (GO:1901796)	0.177477	0.951739	28	HDAC2	PRKAA1	PRKAA2	PHF20	PAK1IP1	BRCA1	ING5	RBBP4	CHEK1	SMYD2	RBBP8	TP53BP2	TOPBP1	BRD7	RFFL	TP63	BARD1	BRPF1	TAF15	RPA1	HIPK1	MAPK14	KAT6A	TAF4B	MDM4	DNA2	RAD9B	TAF3
response to calcium ion (GO:0051592)	0.182505	0.951739	17	MEF2A	NLGN1	TRPC3	TRPC1	ALOX15	FGG	ANXA11	PKD2	CRHBP	RASA4	KCNMB1	KCNMB2	ALOX5AP	CPNE3	CALM3	SLC25A12	CALM1
peptidyl-threonine phosphorylation (GO:0018107)	0.176841	0.951739	15	ACVR1	CAMK1D	ROCK2	HIPK3	DCLK1	CAMKK2	TGFBR2	MYLK4	TBK1	PHKG2	CHEK1	MAPK1	ULK1	PRKD1	CAMK2G
apoptotic process (GO:0006915)	0.171593	0.951739	45	NOTCH2	APP	EI24	CXCR4	BRCA1	AHR	MRPS30	IFIT2	BCLAF1	BCL2L11	AIFM1	ERBB3	CASP10	PLAGL1	MYC	RFK	CHEK1	BNIP2	RIPK1	RNF152	MAP3K7	TP63	SEMA6A	APAF1	DCC	MAGI3	BNIP3	LIG4	PAWR	GLRX2	SDIM1	TGFBR2	DAP	PLSCR1	FAP	IFNG	DLC1	BCL2	FAS	NDUFS1	TNFSF8	IAPP	NOX5	MYD88	ARHGEF6
regulation of fat cell differentiation (GO:0045598)	0.158865	0.951739	16	FTO	CCDC71L	ANKRD26	SYAP1	RORA	FOXO1	ZFP36L2	ZFP36	CREB1	SFRP2	FRZB	ASXL2	ENPP1	WDFY2	CMKLR1	RUNX1T1
protein localization to membrane (GO:0072657)	0.17851	0.951739	32	DPP10	NLGN1	NLGN2	ROCK2	NRXN1	LIN7A	LIN7C	LRP6	RAB40A	PDZD11	P2RY1	MAP7	TMED2	MADCAM1	CLASP2	SH3GLB1	KCNB1	RDX	ANK3	FAM126A	RAB10	CACNB2	TSPAN14	DLG2	RAB37	SLMAP	WNK3	RAPGEF2	CPE	RAB38	TNIK	FGF13
intracellular protein transport (GO:0006886)	0.163107	0.951739	66	RAB3B	VPS29	IPO11	C2CD5	AP4E1	IPO7	RAB22A	NPAP1	RAB44	XPO4	TBC1D30	TMED3	TMED2	TNPO1	TMED5	TNPO3	RAB2A	NSF	TICAM2	USP6	STX7	TBC1D9	TBC1D2B	AP3B1	RAB33B	NUP93	TBC1D1	RAB30	IFNG	CTAGE5	RAB37	TBC1D5	RAB38	HAP1	NUP62CL	SLU7	KPNB1	RBM22	CRB1	RAB1A	NLGN1	AKAP6	LTBP2	RAB40A	SNX27	RAB23
positive regulation of protein modification process (GO:0031401)	0.155712	0.951739	33	APP	CD40	ANKLE2	ROCK2	ITGB3	ITLN1	FPR2	CYR61	EGFR	CAMKK2	P2RY1	RIPK1	MUSK	INSR	AKTIP	PLAUR	F2	ACVR2A	BMP4	ADAM17	IFNG	DLC1	CNEP1R1	UBE2N	RAB3GAP2	FAS	KRAS	CALM3	TNIK	TEK	WDFY2	CALM1	ALG10B
response to cytokine (GO:0034097)	0.177477	0.951739	28	SETD2	PID1	CXCR4	AKAP6	AFF3	TBK1	UBD	DPYSL3	TIMP2	CCR7	RIPK1	JUNB	MME	EIF2AK2	IRAK3	PTPN13	PTPN14	PLSCR1	TRAF6	ALDH1A2	IL1RAPL1	BCL2	REL	XAF1	TRIM32	PTPN5	MYD88	PTPN2
protein localization to cell periphery (GO:1990778)	0.186117	0.964632	24	DPP10	KCNB1	ROCK2	RDX	LIN7A	ANK3	LIN7C	FAM126A	LRP6	RAB10	CACNB2	TSPAN14	RAB40A	PDZD11	RAB37	SLMAP	P2RY1	WNK3	MAP7	RAPGEF2	TMED2	TNIK	FGF13	CLASP2
activation of MAPK activity (GO:0000187)	0.186117	0.964632	24	MAP3K2	PRKAA1	INSR	C5AR1	CXCR4	PIK3CB	MAPK14	FGF2	MDFIC	TRAF6	TAOK1	UBE2N	TAB3	MAPK1	RIPK1	S1PR2	MAP3K9	TAB1	MAP3K7	TDGF1	PROK1	MAP3K5	MAP2K6	FGF10
positive regulation of cell proliferation (GO:0008284)	0.185756	0.964632	79	BMP10	CNTF	PID1	RTKN2	KIF14	ASH2L	FGF2	CYR61	CXCL5	HOXC10	MECP2	UFL1	HMGN5	FGF9	MYC	NAMPT	ITGAV	PROK1	PRKCI	EDN1	GLP2R	F2R	LIG4	TET1	SOX11	PROX1	POU3F3	FOXP1	TGFBR2	NME1	ADAM17	SFRP2	IFNG	BIRC5	PHIP	CD47	STAMBP	LTF	PTGFR	HDAC2	C5AR1	PDGFB	DLL1	EGFR	PKHD1	PRDX3
glucose homeostasis (GO:0042593)	0.187225	0.96929	16	MBD5	PRKAA1	PRKAA2	KCNB1	INSR	ACSM2A	NUCKS1	PAX6	FOXO1	CYB5R4	HECTD4	POLR2D	CRY1	PPARGC1A	PTPN2	MCU
negative regulation of intracellular signal transduction (GO:1902532)	0.188307	0.971621	32	PHLPP2	PSMD10	PRKAA1	PHLPP1	PRKAA2	PDE3B	OTUD7B	TNFAIP3	TWIST1	RORA	UBR1	ARHGAP12	PREX2	PKHD1	DEPTOR	RIPK1	RFFL	DUSP3	ATP2B4	PLAUR	RHOH	TSC1	ESR1	CD2AP	P2RX7	PPM1A	APLNR	BCL2	NF1	TRIM59	STAMBP	OTUD3
neuron differentiation (GO:0030182)	0.188018	0.971621	28	MTPN	TENM1	WNT2B	ATP8A2	RORB	LRP6	MAPK9	OPHN1	TGFB2	FZD3	MYEF2	FZD5	RYK	ATP2B2	PAX6	SOX11	PROX1	THOC2	INHBA	WNT16	CCSAP	PHOX2B	RUNX2	RUNX1	NR4A2	MAPK10	ISL2	IL1RAPL1
ion transport (GO:0006811)	0.188101	0.971621	55	GABRB3	GABRB2	GABRB1	ATP8A1	ATP2A2	AQP2	SLC8A1	GABRR2	GJA1	PIEZO2	SLC36A2	SLC15A2	TSC22D3	ATP11B	ANO6	ANO3	TRDN	SLC9B2	SLC9A4	VDAC2	SGK3	SGK2	SLC24A2	HCN4	SLC20A2	ATP10D	SLC1A1	SLC5A12	NEDD4L	ATP1A2	ATP10A	ATP2C1	NALCN	SLC25A26	PDZD11	BSND	SLC17A2	ATP6V1C1	TRPM3	ATP6V1C2	GABRA2	GABRA1	GABRA4	SLC12A1	GABRA3	ATP2B4
regulation of endothelial cell chemotaxis (GO:2001026)	0.199781	0.987477	4	SEMA5A	PRKD1	FGF2	MET
regulation of execution phase of apoptosis (GO:1900117)	0.199781	0.987477	4	FZD3	FAP	DLC1	TP53BP2
regulation of necrotic cell death (GO:0010939)	0.199781	0.987477	4	HEBP2	RIPK1	BIRC2	BIRC3
negative regulation of viral release from host cell (GO:1902187)	0.199781	0.987477	4	TRIM5	TRIM35	TRIM32	TRIM11
regulation of cAMP-dependent protein kinase activity (GO:2000479)	0.199781	0.987477	4	PRKAR1A	PKIA	ATP2B4	RAPGEF2
synaptic vesicle localization (GO:0097479)	0.199781	0.987477	4	NLGN1	KIF5C	KIF5B	RAB27A
positive regulation of endothelial cell chemotaxis (GO:2001028)	0.199781	0.987477	4	SEMA5A	PRKD1	FGF2	MET
cardiocyte differentiation (GO:0035051)	0.199781	0.987477	4	AKAP13	TGFB2	SIK1	PROX1
mitochondrial genome maintenance (GO:0000002)	0.199781	0.987477	4	MEF2A	AKT3	MRPL17	SLC25A4
regulation of chemokine production (GO:0032642)	0.205969	0.987477	5	ADAM17	TSLP	EIF2AK2	HIF1A	TLR3
insulin secretion (GO:0030073)	0.205969	0.987477	5	CYB5R4	PTPRN2	SLC30A8	RAB11FIP2	CAMK2G
positive regulation of protein complex disassembly (GO:0043243)	0.199781	0.987477	4	FYCO1	BNIP3	INSR	SMCR8
negative regulation of macrophage derived foam cell differentiation (GO:0010745)	0.199781	0.987477	4	CRP	ABCA5	ITGB3	ITGAV
multivesicular body sorting pathway (GO:0071985)	0.199781	0.987477	4	VTA1	RAB27A	RAB27B	EXPH5
positive regulation of T cell mediated cytotoxicity (GO:0001916)	0.199781	0.987477	4	FAM49B	IL23A	STX7	PVR
copper ion homeostasis (GO:0055070)	0.199781	0.987477	4	APP	XIAP	PRND	ATOX1
glycerolipid catabolic process (GO:0046503)	0.199781	0.987477	4	PLA2G4D	ABHD2	GPCPD1	MGLL
cellular response to interleukin-6 (GO:0071354)	0.207417	0.987477	6	FER	SELPLG	PID1	ST3GAL6	CBL	TDGF1
regulation of cellular response to transforming growth factor beta stimulus (GO:1903844)	0.205969	0.987477	5	SMAD2	DLX1	EID2	SOX11	DKK3
regulation of cardiac muscle cell proliferation (GO:0060043)	0.205969	0.987477	5	BMP10	TBX20	POLR2D	FGF2	BMPR1A
positive regulation of cardiac muscle cell proliferation (GO:0060045)	0.199781	0.987477	4	BMP10	TBX20	FGF2	BMPR1A
atrial cardiac muscle cell action potential (GO:0086014)	0.199781	0.987477	4	GJC1	CACNB2	GJA1	KCNJ3
regulation of superoxide anion generation (GO:0032928)	0.199781	0.987477	4	CRP	ITGAM	FPR2	CD177
regulation of interleukin-1 beta production (GO:0032651)	0.199781	0.987477	4	GHSR	F2R	CCR7	FOXP1
apoptotic nuclear changes (GO:0030262)	0.207417	0.987477	6	TOP2A	CECR2	ACVR1C	HMGB1	DICER1	KPNB1
regulation of interleukin-8 secretion (GO:2000482)	0.207417	0.987477	6	CRP	C5AR2	F2R	PTPN22	TLR6	CD58
regulation of transmembrane receptor protein serine/threonine kinase signaling pathway (GO:0090092)	0.206418	0.987477	7	BMP4	SMAD2	EID2	BMPER	XIAP	SOX11	DKK3
peroxisome organization (GO:0007031)	0.207417	0.987477	6	PLA2G16	TMEM135	PEX19	PEX3	PEX2	MFF
actin filament polymerization (GO:0030041)	0.205969	0.987477	5	COBLL1	MSRB2	COBL	ANG	WASF3
endoplasmic reticulum calcium ion homeostasis (GO:0032469)	0.205969	0.987477	5	RAP1GDS1	BCL2	ATP2A2	PSEN1	TMCO1
membrane assembly (GO:0071709)	0.207417	0.987477	6	NLGN1	NLGN2	NRXN1	IL1RAPL1	ANK3	STX2
cellular response to ammonium ion (GO:0071242)	0.207417	0.987477	6	GABRB3	GABRB2	CRHBP	GABRB1	MAPK1	GABPA
glucan catabolic process (GO:0009251)	0.205969	0.987477	5	AGL	PHKG2	PHKB	CALM1	PGM2L1
protein K48-linked deubiquitination (GO:0071108)	0.207417	0.987477	6	OTUD4	USP8	USP25	OTUD7B	TNFAIP3	OTUD3
regulation of mRNA processing (GO:0050684)	0.206418	0.987477	7	RBM27	TIA1	YTHDC1	SRSF3	SRSF10	IWS1	SRPK1
DNA-templated transcriptional preinitiation complex assembly (GO:0070897)	0.199781	0.987477	4	GTF2A2	TAF1B	BDP1	MED6
positive regulation of innate immune response (GO:0045089)	0.200886	0.987477	9	ANKRD17	PLSCR1	POLR3D	POLR3F	TLR8	POLR3G	UBE2K	TLR3	PUM2
regulation of amyloid-beta formation (GO:1902003)	0.205969	0.987477	5	APP	ROCK2	HAP1	SORL1	CLU
negative regulation of calcium-mediated signaling (GO:0050849)	0.205969	0.987477	5	ATP2B4	CALM3	PKD2	CALM1	TRDN
detection of calcium ion (GO:0005513)	0.199781	0.987477	4	KCNMB1	KCNMB2	CALM3	CALM1
cellular response to ketone (GO:1901655)	0.206418	0.987477	7	PTGER4	GNG2	ROCK2	TNFSF4	AHR	NR3C1	GNAI1
negative regulation of osteoclast differentiation (GO:0045671)	0.205969	0.987477	5	MAFB	ZNF675	TLR3	FBN1	LTF
negative regulation of viral transcription (GO:0032897)	0.207417	0.987477	6	ZFP36	HMGA2	TRIM27	TARDBP	TRIM32	TRIM11
positive regulation of neuron death (GO:1901216)	0.200886	0.987477	9	TFAP2A	TGFB2	ITGAM	NF1	TLR6	FOXO3	GRIN2B	CLU	MAP3K5
positive regulation of nucleocytoplasmic transport (GO:0046824)	0.204052	0.987477	8	RBM27	KHDRBS1	CPSF6	XPO4	NCBP2	TPR	ZIC1	RBM22
receptor localization to synapse (GO:0097120)	0.205969	0.987477	5	NLGN1	CACNG8	DLG2	KIF5C	KIF5B
mRNA destabilization (GO:0061157)	0.205969	0.987477	5	METTL14	ZFP36	RC3H1	CPEB3	ZFP36L2
establishment or maintenance of epithelial cell apical/basal polarity (GO:0045197)	0.204052	0.987477	8	PRKCI	DLG2	OPHN1	PDZD11	LIN7A	LIN7C	LRRD1	MYO9A
regulation of ion homeostasis (GO:2000021)	0.207417	0.987477	6	HCN4	SLC30A6	SLC30A8	SLC30A5	WNK3	NEDD4L
regulation of chondrocyte differentiation (GO:0032330)	0.207417	0.987477	6	EFEMP1	TRPS1	SOX6	GDF5	SOX5	LOXL2
cellular response to mechanical stimulus (GO:0071260)	0.193334	0.987477	11	PTGER4	MAP3K2	CD40	MAP3K1	BNIP3	CHEK1	PIEZO2	TLR8	FAS	TLR3	MYD88
mitotic G2/M transition checkpoint (GO:0044818)	0.207417	0.987477	6	TAOK3	TAOK1	DONSON	HMGA2	TOPBP1	ZNF830
negative regulation of intracellular steroid hormone receptor signaling pathway (GO:0033144)	0.206418	0.987477	7	KANK2	HEYL	CRY1	BRCA1	PIAS2	ZNF366	FOXP1
entry into host cell (GO:0030260)	0.204052	0.987477	8	GPR15	ITGB3	CTNND1	CXCR4	ITGAV	CBL	MET	PPIA
glycogen metabolic process (GO:0005977)	0.204052	0.987477	8	UGP2	PPP1R3C	GBE1	AGL	PHKG2	PHKB	CALM1	PGM2L1
cell-cell adhesion mediated by cadherin (GO:0044331)	0.207417	0.987477	6	FER	CDH11	CDH8	CDH18	CDH7	CDH19
transcription elongation from RNA polymerase I promoter (GO:0006362)	0.206418	0.987477	7	TAF1D	TAF1B	POLR1B	TWISTNB	TAF1A	POLR2F	GTF2H5
regulation of protein metabolic process (GO:0051246)	0.202125	0.987477	13	MTPN	APP	ROCK2	PLAUR	KLHL11	NEDD4L	SSH1	ABTB2	PM20D2	SPOP	IGF2BP1	SPOPL	IGF2BP2
primary neural tube formation (GO:0014020)	0.206418	0.987477	7	TGFB2	DLC1	SEMA4C	COBL	GRHL2	PHACTR4	LRP6
calcium ion import (GO:0070509)	0.206418	0.987477	7	CACNB2	CATSPER2	TRPC4	ATP2A2	NALCN	SLC8A1	MCU
blood vessel endothelial cell migration (GO:0043534)	0.205969	0.987477	5	NR4A1	FGF2	TDGF1	EPHB4	ROBO1
glycogen catabolic process (GO:0005980)	0.205969	0.987477	5	AGL	PHKG2	PHKB	CALM1	PGM2L1
positive regulation of calcium ion transport (GO:0051928)	0.204052	0.987477	8	P2RX7	CACNB2	TRPC3	STIM2	F2R	WNK3	PDGFB	MYLK
negative regulation of protein metabolic process (GO:0051248)	0.197248	0.987477	10	EDN1	SF3B3	ITGB3	MDM4	ITGAV	IAPP	IRAK3	CLU	EGFR	AZIN1
regulation of multicellular organismal development (GO:2000026)	0.197248	0.987477	10	PLA2G16	CXCL10	NIPBL	INSR	TRIP12	HMGB1	PHLDB2	CCSAP	FOXP1	CLASP2
negative regulation of axon extension (GO:0030517)	0.207417	0.987477	6	SEMA5A	SEMA4A	SEMA3C	SEMA4C	SEMA3E	SEMA4F
substantia nigra development (GO:0021762)	0.197248	0.987477	10	ZNF430	HSPA5	FGF9	MAPKAP1	CCDC14	GNB4	CALM3	CALM1	ZNF148	COX6B1
positive regulation of locomotion (GO:0040017)	0.204052	0.987477	8	VPS4A	CHMP2B	PDGFB	TWIST1	CCR7	VPS37B	TRIM32	PPM1F
nucleotide-binding oligomerization domain containing signaling pathway (GO:0070423)	0.206418	0.987477	7	TRAF6	UBE2N	TAB3	TNFAIP3	TAB1	MAP3K7	MAP2K6
regulation of release of sequestered calcium ion into cytosol by sarcoplasmic reticulum (GO:0010880)	0.207417	0.987477	6	ATP1A2	CALM3	AKAP6	CALM1	SLC8A1	TRDN
cellular glucose homeostasis (GO:0001678)	0.204052	0.987477	8	UNC13B	KCNB1	TRA2B	PDK3	NUCKS1	ZNF236	PPARGC1A	FOXO1
positive regulation of kinase activity (GO:0033674)	0.203546	0.987477	23	DDR1	EPHA6	MUSK	RYK	INSR	PIFO	DUSP19	F2	CYR61	EGFR	CAMKK2	DSTYK	ERBB3	RAPGEF2	ROR1	CCR7	TEK	ROR2	MET	EPHB1	ROS1	EPHB4	EPHB3
histone H3 acetylation (GO:0043966)	0.197248	0.987477	10	ING5	KAT2B	BRD1	BRPF1	TADA2A	KAT6B	KAT6A	MBIP	ELP4	MAP3K7
regulation of response to external stimulus (GO:0032101)	0.196643	0.987477	22	SCARB2	ELMOD2	F2R	CXCR4	OTUD7B	XIAP	TNFAIP3	NR1D2	PTGS2	F2	FOXP1	STK24	GRK4	TRIM5	TNFSF4	BCL6B	CALM1	METAP1	MGLL	BIRC2	MYD88	BIRC3
positive regulation of cell motility (GO:2000147)	0.202249	0.987477	35	SEMA3C	PDGFB	TWIST1	SEMA3E	CYR61	EGFR	MYLK	FAM110C	PDGFC	GCNT2	HAS2	CPNE3	CCR7	ZNF304	ACVR1	SEMA4A	EDN1	HSPA5	INSR	SEMA4C	RDX	F2R	SEMA4F	SOD2	ADAM17	FER	APC	SNAI1	ANGPTL3	CNTN1	FGFR1OP	ITGA6	ROR2	TRIM32	TDGF1
stress-activated protein kinase signaling cascade (GO:0031098)	0.207904	0.987756	15	MAP3K2	MAP3K1	MAPKAP1	MAPK13	STK10	TAOK3	STK24	TAOK1	NEK1	MAPK1	TNIK	BTRC	MAP3K7	MAP3K5	MAP2K6
negative regulation of developmental process (GO:0051093)	0.207904	0.987756	14	SFMBT1	BNIP3	RC3H1	OMA1	DLL1	2019-03-05	TBX18	LOXL2	ROBO1	BMP4	RPS6KA6	ACVR1C	CDK6	NFIB	SOSTDC1
neuron projection morphogenesis (GO:0048812)	0.208724	0.990636	32	APP	NLGN1	ECM2	CTNND2	SDC2	FLRT3	SLITRK1	SLITRK3	SLITRK6	SLIT3	NRCAM	SRGAP2	EPHB1	EPHB3	LINGO2	MEF2A	BDNF	RYK	DCC	RHOH	KERA	ANK3	DICER1	DCLK1	RAB10	IMPACT	STK24	TMEM106B	TNIK	CNTN4	SHANK2	LLGL1
neutrophil degranulation (GO:0043312)	0.209114	0.991468	88	ITGAM	ATP8A1	GDI2	LPCAT1	SLC2A3	HMGB1	CTSS	HEBP2	STK10	RAB44	GLIPR1	GM2A	TIMP2	PSMD1	OLR1	ITGAV	CPNE3	CD36	B2M	CD33	CD177	KCMF1	TICAM2	MME	CD93	NHLRC3	APAF1	TUBB	NFAM1	PLAUR	CYBB	ATP11B	ANO6	SCAMP1	EEF1A1	DNAJC3	CLEC4C	RAP2B	RAB37	DSG1	CD47	PPIA	CD44	PAFAH1B2	KPNB1	VCL
nucleoside phosphate biosynthetic process (GO:1901293)	0.230434	0.997865	3	CMPK1	CMPK2	AK4
Notch signaling involved in heart development (GO:0061314)	0.230434	0.997865	3	NOTCH2	HEY1	SNAI1
nucleoside triphosphate biosynthetic process (GO:0009142)	0.230434	0.997865	3	CMPK1	CMPK2	AK4
endothelial cell chemotaxis (GO:0035767)	0.230434	0.997865	3	NR4A1	NOV	CXCL13
regulation of skeletal muscle cell differentiation (GO:2001014)	0.230434	0.997865	3	DDX17	UQCC2	NR1D2
positive regulation of toll-like receptor 3 signaling pathway (GO:0034141)	0.335925	0.997865	2	PTPN22	TIRAP
regulation of transforming growth factor beta2 production (GO:0032909)	0.335925	0.997865	2	TGFB2	HIF1A
positive regulation of phosphorylation of RNA polymerase II C-terminal domain (GO:1901409)	0.230434	0.997865	3	CCNT2	CCNT1	CCNC
regulation of methylation-dependent chromatin silencing (GO:0090308)	0.230434	0.997865	3	TET1	ZNF304	AICDA
protein localization to vacuole (GO:0072665)	0.230434	0.997865	3	SH3GLB1	RNF128	C12ORF66
oxygen homeostasis (GO:0032364)	0.335925	0.997865	2	SOD2	HIF1A
positive regulation of microglial cell activation (GO:1903980)	0.335925	0.997865	2	APP	ITGAM
glucose import (GO:0046323)	0.230434	0.997865	3	SLC2A10	SLC2A13	SLC2A12
positive regulation of axon guidance (GO:1902669)	0.335925	0.997865	2	SEMA5A	TUBB2B
aromatic compound catabolic process (GO:0019439)	0.335925	0.997865	2	PON2	EPHX2
response to UV-C (GO:0010225)	0.230434	0.997865	3	YY1	IMPACT	DCUN1D3
negative regulation of systemic arterial blood pressure (GO:0003085)	0.335925	0.997865	2	PRCP	SOD2
negative regulation of centrosome duplication (GO:0010826)	0.279717	0.997865	3	KAT2B	TRIM37	BRCA1
regulation of sensory perception of pain (GO:0051930)	0.230434	0.997865	3	NOV	F2R	MGLL
necroptotic process (GO:0070266)	0.238415	0.997865	4	TICAM2	TRPM7	RIPK1	TLR3
negative regulation of embryonic development (GO:0045992)	0.279717	0.997865	3	RPS6KA6	FZD3	SFRP2
positive regulation of viral release from host cell (GO:1902188)	0.278564	0.997865	4	CAV2	VPS4A	CHMP2B	VPS37B
central nervous system projection neuron axonogenesis (GO:0021952)	0.279717	0.997865	3	NFIB	EPHB1	PAFAH1B1
copper ion transport (GO:0006825)	0.238415	0.997865	4	SLC31A1	SLC11A2	STEAP2	ATOX1
negative regulation of muscle cell differentiation (GO:0051148)	0.278564	0.997865	4	BMP4	SOSTDC1	DLL1	EID2B
regulation of protein K63-linked ubiquitination (GO:1900044)	0.335925	0.997865	2	PTPN22	BIRC2
positive regulation of mitochondrial fission (GO:0090141)	0.238415	0.997865	3	BNIP3	DDHD1	MFF	2019-03-05
protein insertion into mitochondrial membrane involved in apoptotic signaling pathway (GO:0001844)	0.335925	0.997865	2	MOAP1	BCL2L11
negative regulation of T cell differentiation in thymus (GO:0033085)	0.335925	0.997865	2	BMP4	PTPN2
growth hormone secretion (GO:0030252)	0.335925	0.997865	2	GHSR	RAB1A
positive regulation of fatty acid oxidation (GO:0046321)	0.329794	0.997865	3	ABCD2	TWIST1	PPARGC1A
pyrimidine-containing compound catabolic process (GO:0072529)	0.238415	0.997865	4	DPYD	TET3	TET2	TET1
regulation of fatty acid beta-oxidation (GO:0031998)	0.279717	0.997865	3	ABCD2	TYSND1	TWIST1
negative regulation of intracellular estrogen receptor signaling pathway (GO:0033147)	0.279717	0.997865	3	KANK2	BRCA1	ZNF366
polyphosphate metabolic process (GO:0006797)	0.335925	0.997865	2	MINPP1	BNIP2
response to ethanol (GO:0045471)	0.238415	0.997865	4	GRIN2A	GRIN3A	GRIN2B	ADH6
plus-end-directed organelle transport along microtubule (GO:0072386)	0.335925	0.997865	2	FYCO1	KIF3A
purine ribonucleoside monophosphate biosynthetic process (GO:0009168)	0.223054	0.997865	9	MT-ATP6	ADSL	ATIC	ATP5A1	GMPS	PAICS	ATP5G1	GART	MT-ATP8
regulation of tooth mineralization (GO:0070170)	0.335925	0.997865	2	TFAP2A	ASPN
cerebral cortex cell migration (GO:0021795)	0.335925	0.997865	2	FGF13	PEX13
sodium ion import across plasma membrane (GO:0098719)	0.278564	0.997865	4	HCN4	SLC9A4	SLC8A1	SLC9C2
regulation of single stranded viral RNA replication via double stranded DNA intermediate (GO:0045091)	0.279717	0.997865	3	TOP2A	HMGA2	AICDA
peroxisomal membrane transport (GO:0015919)	0.335925	0.997865	2	PEX19	PEX3
regulation of histone deacetylase activity (GO:1901725)	0.335925	0.997865	2	KDM5A	PRKD1
regulation of phosphatidylinositol biosynthetic process (GO:0010511)	0.335925	0.997865	2	PDGFB	HTR2C
establishment of endothelial intestinal barrier (GO:0090557)	0.335925	0.997865	2	TJP1	RAPGEF2
mRNA 5'-splice site recognition (GO:0000395)	0.335925	0.997865	2	SRSF1	SRSF12
aggrephagy (GO:0035973)	0.335925	0.997865	2	UBQLN1	ATG5
positive regulation of mitophagy in response to mitochondrial depolarization (GO:0098779)	0.335925	0.997865	2	MFN2	OPTN
regulation of calcineurin-NFAT signaling cascade (GO:0070884)	0.238415	0.997865	4	RCAN1	RCAN3	ATP2B4	AKAP6
response to UV-A (GO:0070141)	0.335925	0.997865	2	MME	EGFR
regulation of neuron migration (GO:2001222)	0.239114	0.997865	5	NIPBL	ZNF609	SEMA6A	RAPGEF2	SRGAP2
negative regulation of sodium ion transmembrane transporter activity (GO:2000650)	0.279717	0.997865	3	HECW1	NEDD4L	ATP1A2
regulation of sequestering of zinc ion (GO:0061088)	0.279717	0.997865	3	SLC30A6	SLC30A8	SLC30A5
vesicle cytoskeletal trafficking (GO:0099518)	0.27356	0.997865	5	RAB1A	KIF5B	HAP1	FNBP1L	PAFAH1B1
regulation of interleukin-1 secretion (GO:0050704)	0.230434	0.997865	3	CCR7	HMGB1	FOXP1
regulation of endothelial cell differentiation (GO:0045601)	0.230434	0.997865	3	BTG1	ATOH8	VEZF1
regulation of ribonucleoprotein complex localization (GO:2000197)	0.335925	0.997865	2	SETD2	IWS1
polarized epithelial cell differentiation (GO:0030859)	0.279717	0.997865	3	RAB10	OPHN1	MYO9A
cell communication by electrical coupling involved in cardiac conduction (GO:0086064)	0.238415	0.997865	4	GJC1	GJA1	ATP1A2	SLC8A1
regulation of interleukin-6 biosynthetic process (GO:0045408)	0.230434	0.997865	3	GHSR	TLR6	TIRAP
negative regulation of T cell differentiation (GO:0045581)	0.329794	0.997865	3	BMP4	TNFSF4	GLI3
regulation of gene expression by genetic imprinting (GO:0006349)	0.279717	0.997865	3	KDM1B	PCGF5	PCGF3
amino sugar metabolic process (GO:0006040)	0.279717	0.997865	3	EXTL2	ST6GAL1	SLC35A3
regulation of dopamine metabolic process (GO:0042053)	0.335925	0.997865	2	ITGAM	HPRT1
pericardium development (GO:0060039)	0.230434	0.997865	3	TBX20	LRP6	BMP5
regulation of aldosterone biosynthetic process (GO:0032347)	0.335925	0.997865	2	DKK3	BMP5
mitochondrion localization (GO:0051646)	0.278564	0.997865	4	MEF2A	MSTO1	MFN2	HAP1
coronary vasculature development (GO:0060976)	0.335925	0.997865	2	BMP4	APLNR
positive regulation of interferon-alpha production (GO:0032727)	0.239114	0.997865	5	SETD2	TBK1	DHX36	TLR8	TLR3
negative regulation of type I interferon-mediated signaling pathway (GO:0060339)	0.335925	0.997865	2	CNOT7	PTPN2
tRNA wobble uridine modification (GO:0002098)	0.230434	0.997865	3	URM1	KIAA1456	ALKBH8
negative regulation of cAMP-mediated signaling (GO:0043951)	0.335925	0.997865	2	PDE3B	APLNR
regulation of cortisol biosynthetic process (GO:2000064)	0.335925	0.997865	2	DKK3	BMP5
actin filament depolymerization (GO:0030042)	0.279717	0.997865	3	CFL2	DSTN	MICAL2
carbohydrate transport (GO:0008643)	0.335925	0.997865	2	SLC35D3	AQP2
ESCRT complex disassembly (GO:1904896)	0.279717	0.997865	3	VTA1	VPS4A	CHMP2B
positive regulation of fatty acid beta-oxidation (GO:0032000)	0.401685	0.997865	2	ABCD2	TWIST1
negative regulation of epidermal cell differentiation (GO:0045605)	0.401685	0.997865	2	GRHL2	DLL1
thymus development (GO:0048538)	0.238415	0.997865	4	ZBTB1	SIX1	FGF10	EPHB3
positive regulation of G1/S transition of mitotic cell cycle (GO:1900087)	0.319645	0.997865	4	ANKRD17	LSM11	RDX	UBE2E2
positive regulation of protein import into nucleus, translocation (GO:0033160)	0.335925	0.997865	2	IFNG	PSEN1
negative regulation of nucleocytoplasmic transport (GO:0046823)	0.329794	0.997865	3	BARD1	MDFIC	TPR
heparan sulfate proteoglycan biosynthetic process, enzymatic modification (GO:0015015)	0.335925	0.997865	2	HS6ST2	HS2ST1
metanephric mesenchyme development (GO:0072075)	0.329794	0.997865	3	SIX4	SIX1	PKD2
negative regulation of interleukin-2 production (GO:0032703)	0.278564	0.997865	4	ZFP36	TNFAIP3	TRIM27	HAVCR2
negative regulation of mitotic nuclear division (GO:0045839)	0.230434	0.997865	3	BMP4	RGCC	CHEK1
iron ion import (GO:0097286)	0.335925	0.997865	2	TFRC	SLC11A2
positive regulation of protein deubiquitination (GO:1903003)	0.401685	0.997865	2	SART3	WDR48
negative regulation of cell size (GO:0045792)	0.335925	0.997865	2	DEPTOR	RDX
regulation of transmembrane transport (GO:0034762)	0.236701	0.997865	6	KCNJ10	BCL2	KCNJ15	NEDD4L	KCNJ2	KCNJ3
phosphate ion homeostasis (GO:0055062)	0.329794	0.997865	3	ENPP1	GPCPD1	XPR1
transcription initiation from RNA polymerase III promoter (GO:0006384)	0.335925	0.997865	2	CRCP	BDP1
gas homeostasis (GO:0033483)	0.401685	0.997865	2	SOD2	HIF1A
mesoderm morphogenesis (GO:0048332)	0.279717	0.997865	3	EOMES	SMAD2	SNAI1
embryonic camera-type eye development (GO:0031076)	0.335925	0.997865	2	ALDH1A3	LRP6
positive regulation of blood coagulation (GO:0030194)	0.239114	0.997865	5	F2R	CNTN1	ANO6	PLG	F2
negative regulation of platelet activation (GO:0010544)	0.278564	0.997865	4	PDGFB	CD9	F2	PRKG1
dorsal/ventral axis specification (GO:0009950)	0.279717	0.997865	3	SMAD2	FZD5	LRP6
ionotropic glutamate receptor signaling pathway (GO:0035235)	0.230434	0.997865	3	GRIA2	APP	CPEB4
negative regulation of receptor biosynthetic process (GO:0010871)	0.335925	0.997865	2	ITGB3	ITGAV
progesterone metabolic process (GO:0042448)	0.329794	0.997865	3	SRD5A1	AKR1C2	AKR1C4
platelet dense granule organization (GO:0060155)	0.335925	0.997865	2	BLOC1S2	F2R
sphingosine metabolic process (GO:0006670)	0.230434	0.997865	3	ASAH2B	ASAH2	ACER3
histone mRNA catabolic process (GO:0071044)	0.329794	0.997865	3	PAPD5	PAPD4	DCP2
sodium ion import (GO:0097369)	0.278564	0.997865	4	HCN4	SLC9A4	SLC8A1	SLC9C2
protein geranylgeranylation (GO:0018344)	0.335925	0.997865	2	CHM	CHML
glutamine metabolic process (GO:0006541)	0.279717	0.997865	3	ALDH5A1	LGSN	GLS
positive regulation of cell migration by vascular endothelial growth factor signaling pathway (GO:0038089)	0.401685	0.997865	2	GAB1	PRKD1
neuron projection organization (GO:0106027)	0.230434	0.997865	3	APP	INSR	PSEN1
negative regulation of amyloid-beta formation (GO:1902430)	0.230434	0.997865	3	HAP1	SORL1	CLU
lipoxygenase pathway (GO:0019372)	0.278564	0.997865	4	PON2	ALOX15	ALOX5AP	PTGS2
purine nucleobase biosynthetic process (GO:0009113)	0.335925	0.997865	2	GMPS	PAICS
peptide hormone secretion (GO:0030072)	0.267135	0.997865	6	GHSR	RAB1A	CYB5R4	EDN1	SLC30A8	CAMK2G
positive regulation of cell migration involved in sprouting angiogenesis (GO:0090050)	0.319645	0.997865	4	AKT3	PTGS2	PIK3C2A	FGF2
establishment of synaptic vesicle localization (GO:0097480)	0.329794	0.997865	3	KIF5C	KIF5B	RAB27A
positive regulation of activin receptor signaling pathway (GO:0032927)	0.335925	0.997865	2	SMAD2	ACVR2A
protein deubiquitination involved in ubiquitin-dependent protein catabolic process (GO:0071947)	0.335925	0.997865	2	OTUD7B	TNFAIP3
negative regulation of smoothened signaling pathway (GO:0045879)	0.239114	0.997865	5	KCTD21	HHIP	BTRC	GLI3	KCTD6
myeloid dendritic cell differentiation (GO:0043011)	0.279717	0.997865	3	UBD	CAMK4	TGFBR2
dendrite extension (GO:0097484)	0.335925	0.997865	2	LLPH	SH3GL2
nucleus localization (GO:0051647)	0.335925	0.997865	2	DCTN4	PAFAH1B1
filopodium assembly (GO:0046847)	0.278564	0.997865	4	DNM3	S1PR2	SRGAP2	VSTM5
response to lipoteichoic acid (GO:0070391)	0.335925	0.997865	2	MAPK14	TIRAP
negative regulation of Rho protein signal transduction (GO:0035024)	0.238415	0.997865	4	DLC1	CCDC125	MET	SCAI
negative regulation of endothelial cell apoptotic process (GO:2000352)	0.236701	0.997865	6	SEMA5A	ANGPT1	FGG	KRIT1	TNFAIP3	TEK
brain morphogenesis (GO:0048854)	0.329794	0.997865	3	MKKS	SHANK2	PAFAH1B1
positive regulation of sodium ion transmembrane transporter activity (GO:2000651)	0.329794	0.997865	3	WNK3	GLRX	ANK3
regulation of phosphorylation of RNA polymerase II C-terminal domain (GO:1901407)	0.329794	0.997865	3	CCNT2	CCNT1	CCNC
zinc II ion transmembrane import (GO:0071578)	0.401685	0.997865	2	SLC39A6	SLC39A14
dendritic spine morphogenesis (GO:0060997)	0.319645	0.997865	4	CTNND2	EPHB1	SHANK2	EPHB3
postsynaptic membrane assembly (GO:0097104)	0.230434	0.997865	3	NLGN1	NLGN2	NRXN1
modulation by host of viral process (GO:0044788)	0.329794	0.997865	3	CRP	CAV2	LTF
mitochondrial fragmentation involved in apoptotic process (GO:0043653)	0.230434	0.997865	3	ATG3	BNIP3	MFF
cellular biogenic amine metabolic process (GO:0006576)	0.279717	0.997865	3	MAOA	TRH	OAZ1
positive regulation of amyloid-beta formation (GO:1902004)	0.279717	0.997865	3	APP	ROCK2	CLU
negative regulation of amyloid precursor protein catabolic process (GO:1902992)	0.329794	0.997865	3	HAP1	SORL1	CLU
regulation of water loss via skin (GO:0033561)	0.319645	0.997865	4	MET	CLDN1	TP63	HRNR
DNA replication-dependent nucleosome assembly (GO:0006335)	0.279717	0.997865	3	CHAF1B	RBBP4	ASF1A
response to axon injury (GO:0048678)	0.329794	0.997865	3	FLRT3	DPYSL3	MTR
regulation of mast cell activation (GO:0033003)	0.230434	0.997865	3	PLSCR1	TSLP	CD226
mannose metabolic process (GO:0006013)	0.401685	0.997865	2	MAN2B2	MAN2A1
muscle tissue development (GO:0060537)	0.335925	0.997865	2	BMP4	NF1
exit from host cell (GO:0035891)	0.335925	0.997865	2	VPS4A	PPIA
lymphoid progenitor cell differentiation (GO:0002320)	0.335925	0.997865	2	BMP4	LIG4
potassium ion import across plasma membrane (GO:1990573)	0.230434	0.997865	3	HCN4	ATP1A2	KCNJ3
protein alkylation (GO:0008213)	0.232787	0.997865	7	EEF1A1	PRMT2	ETF1	SNRPD3	CALM1	METTL21A	GSPT1
regulation of phagocytosis, engulfment (GO:0060099)	0.335925	0.997865	2	ALOX15	ANO6
regulation of ceramide biosynthetic process (GO:2000303)	0.329794	0.997865	3	SAMD8	ORMDL2	ORMDL1
purine ribonucleotide catabolic process (GO:0009154)	0.239114	0.997865	5	PDE3B	PDE5A	HPRT1	NUDT3	NUDT4
regulation of toll-like receptor 9 signaling pathway (GO:0034163)	0.401685	0.997865	2	FCRL3	HMGB1
regulation of glial cell apoptotic process (GO:0034350)	0.335925	0.997865	2	PRKCI	DLL1
V(D)J recombination (GO:0033151)	0.401685	0.997865	2	LIG4	HMGB1
steroid hormone mediated signaling pathway (GO:0043401)	0.27356	0.997865	5	BMP4	MED13	ABHD2	MED4	ESR1
positive regulation of ion transmembrane transport (GO:0034767)	0.230434	0.997865	3	P2RX7	WNK3	ANO6
regulation of anoikis (GO:2000209)	0.27356	0.997865	5	ITGB1	PTRH2	BCL2	SIK1	ZNF304
cellular copper ion homeostasis (GO:0006878)	0.279717	0.997865	3	APP	PRND	ATOX1
regulation of myeloid leukocyte differentiation (GO:0002761)	0.279717	0.997865	3	UBASH3B	CAMK4	FOXP1
positive regulation of ATP biosynthetic process (GO:2001171)	0.335925	0.997865	2	PID1	PPARGC1A
positive regulation of cellular protein catabolic process (GO:1903364)	0.361117	0.997865	4	RNF128	UQCC2	RDX	DACT1
negative regulation of cell division (GO:0051782)	0.329794	0.997865	3	ORC6	MYC	VPS4A
dorsal aorta morphogenesis (GO:0035912)	0.401685	0.997865	2	HEY1	BMPR1A
glycerolipid metabolic process (GO:0046486)	0.279717	0.997865	3	DGKG	ALDH5A1	DGKB
histone H3-K4 trimethylation (GO:0080182)	0.230434	0.997865	3	KMT2A	TET3	TET2
retinal metabolic process (GO:0042574)	0.329794	0.997865	3	ALDH1A3	RDH10	CYP1B1
N-acetylneuraminate metabolic process (GO:0006054)	0.279717	0.997865	3	NANP	ST6GAL1	NPL
positive regulation of neuroblast proliferation (GO:0002052)	0.401685	0.997865	2	FZD3	DISC1
mitochondrion distribution (GO:0048311)	0.329794	0.997865	3	MEF2A	MSTO1	HAP1
positive regulation of osteoblast proliferation (GO:0033690)	0.335925	0.997865	2	CYR61	LTF
autonomic nervous system development (GO:0048483)	0.278564	0.997865	4	NF1	SOX11	PHOX2B	PHACTR4
regulation of phospholipase C activity (GO:1900274)	0.279717	0.997865	3	FGF2	BICD1	ESR1
inositol phosphate-mediated signaling (GO:0048016)	0.27356	0.997865	5	PPP3R1	EDN1	INPP5A	NFATC2	NMUR2
purine ribonucleotide transport (GO:0015868)	0.401685	0.997865	2	SLC25A16	SLC25A4
negative regulation of vasculature development (GO:1901343)	0.335925	0.997865	2	BMP4	PDGFB
magnesium ion transport (GO:0015693)	0.329794	0.997865	3	MMGT1	SLC41A1	NIPA2
positive regulation of endoplasmic reticulum unfolded protein response (GO:1900103)	0.379751	0.997865	3	BCL2L11	TMEM33	AGR2
mitochondrial ATP synthesis coupled proton transport (GO:0042776)	0.522024	0.997865	4	MT-ATP6	ATP5A1	ATP5G1	MT-ATP8
regulation of DNA damage response, signal transduction by p53 class mediator (GO:0043516)	0.267135	0.997865	6	PSMD10	SMYD2	SNAI1	TWIST1	PLA2R1	CD44
regulation of alpha-beta T cell differentiation (GO:0046637)	0.401685	0.997865	2	NKAP	GLI3
regulation of interleukin-10 production (GO:0032653)	0.267135	0.997865	6	TSLP	IL23A	TNFSF4	HMGB1	CD46	DLL1
negative regulation of stress-activated protein kinase signaling cascade (GO:0070303)	0.335925	0.997865	2	MYC	FOXO1
apoptotic DNA fragmentation (GO:0006309)	0.278564	0.997865	4	CECR2	HMGB1	DICER1	KPNB1
response to sterol (GO:0036314)	0.329794	0.997865	3	SMAD2	RORA	TGFBR2
cellular response to epidermal growth factor stimulus (GO:0071364)	0.267135	0.997865	6	EEF1A1	ZFP36	SYAP1	TDGF1	EGFR	ZFP36L2
negative regulation of sequestering of calcium ion (GO:0051283)	0.236701	0.997865	6	F2R	HTR2C	CCR7	PKD2	FGF2	CHERP
aminoglycan metabolic process (GO:0006022)	0.26019	0.997865	7	VCAN	SDC2	XYLT1	B3GALT6	GPC5	GPC4	GPC6
nuclear-transcribed mRNA poly(A) tail shortening (GO:0000289)	0.232787	0.997865	7	ZCCHC11	ZFP36	CNOT6	CNOT7	SAMD4A	PABPC1	EIF4E
regulation of hemopoiesis (GO:1903706)	0.329794	0.997865	3	PURB	EIF2AK2	RUNX1
regulation of leukocyte chemotaxis (GO:0002688)	0.26019	0.997865	7	CXCL10	CXCL6	ADAM17	CAMK1D	PPBP	CXCL13	CXCL5
attachment of GPI anchor to protein (GO:0016255)	0.401685	0.997865	2	PGAP1	PLAUR
cortical cytoskeleton organization (GO:0030865)	0.232787	0.997865	7	ANLN	STRIP1	NLGN1	ROCK2	RTKN2	RHOBTB3	LLGL1
negative regulation of membrane potential (GO:0045837)	0.335925	0.997865	2	HEBP2	BNIP3
T cell migration (GO:0072678)	0.319645	0.997865	4	CXCL10	CCL20	S1PR1	PIK3CG
negative regulation of protein kinase activity by regulation of protein phosphorylation (GO:0044387)	0.401685	0.997865	2	PPM1F	CORO1C
antigen processing and presentation of exogenous peptide antigen via MHC class I, TAP-independent (GO:0002480)	0.230434	0.997865	3	LNPEP	HLA-A	B2M
negative regulation of transcription by competitive promoter binding (GO:0010944)	0.230434	0.997865	3	TFAP2A	CREB1	BHLHE41
negative regulation of heart contraction (GO:0045822)	0.329794	0.997865	3	PLN	AGTR2	PIK3CG
organic cyclic compound catabolic process (GO:1901361)	0.329794	0.997865	3	HSD11B1	STS	EPHX2
granulocyte migration (GO:0097530)	0.401685	0.997865	2	IRAK4	CD177
cellular response to chemokine (GO:1990869)	0.335925	0.997865	2	LRCH1	DOCK8
superoxide anion generation (GO:0042554)	0.279717	0.997865	3	CYBB	NOX5	NOX1
positive regulation of hormone metabolic process (GO:0032352)	0.335925	0.997865	2	HPN	HIF1A
cellular polysaccharide catabolic process (GO:0044247)	0.239114	0.997865	5	AGL	PHKG2	PHKB	CALM1	PGM2L1
regulation of establishment of protein localization (GO:0070201)	0.401685	0.997865	2	KIAA0586	GAPVD1
negative regulation of translational initiation (GO:0045947)	0.319645	0.997865	4	PAIP2B	TPR	EIF4EBP2	PAIP2
neuron cell-cell adhesion (GO:0007158)	0.238415	0.997865	4	NLGN1	NLGN2	NRXN1	CNTN4
regulation of mitotic centrosome separation (GO:0046602)	0.329794	0.997865	3	RANBP3	CHEK1	KIF11
regulation of isotype switching (GO:0045191)	0.401685	0.997865	2	PAXIP1	TFRC
glial cell differentiation (GO:0010001)	0.267135	0.997865	6	PTPRZ1	ERBB3	NFIB	SOX11	PHOX2B	FGF10
smooth muscle cell differentiation (GO:0051145)	0.279717	0.997865	3	BMP4	MKL2	HEY1
positive regulation of leukocyte mediated cytotoxicity (GO:0001912)	0.267135	0.997865	6	FAM49B	CADM1	IL23A	STX7	CD226	PVR
female genitalia development (GO:0030540)	0.401685	0.997865	2	SRD5A1	POLR2D
protein-DNA complex disassembly (GO:0032986)	0.308935	0.997865	5	SMARCE1	SMARCC1	PBRM1	SET	MYC
response to chemokine (GO:1990868)	0.335925	0.997865	2	LRCH1	DOCK8
phosphorylated carbohydrate dephosphorylation (GO:0046838)	0.401685	0.997865	2	INPP5A	INPP1
response to acidic pH (GO:0010447)	0.279717	0.997865	3	IMPACT	GPR65	CTSS
positive regulation of DNA-dependent DNA replication (GO:2000105)	0.379751	0.997865	3	BMP4	ATRX	BMP5
myeloid dendritic cell activation (GO:0001773)	0.238415	0.997865	4	UBD	CAMK4	HMGB1	TGFBR2
fusion of virus membrane with host plasma membrane (GO:0019064)	0.401685	0.997865	2	CXCR4	PPIA
negative regulation of cellular protein localization (GO:1903828)	0.267135	0.997865	6	LEPROT	LEPROTL1	OTUD7B	NEDD4L	GPM6B	TTBK2
negative regulation of substrate adhesion-dependent cell spreading (GO:1900025)	0.379751	0.997865	3	RCC2	AP1AR	CORO1C
epithelial tube morphogenesis (GO:0060562)	0.228111	0.997865	8	ACVR1	BMP4	COL4A1	TBX20	PKD2	MET	MTSS1	FGF10
inositol phosphate dephosphorylation (GO:0046855)	0.401685	0.997865	2	INPP5A	INPP1
positive regulation of heterotypic cell-cell adhesion (GO:0034116)	0.329794	0.997865	3	FGG	GCNT2	CD44
regulation of alternative mRNA splicing, via spliceosome (GO:0000381)	0.223054	0.997865	9	SMU1	DDX17	RBFOX1	MBNL2	RBM8A	TRA2B	MBNL3	HNRNPA1	SRSF12
regulation of regulatory T cell differentiation (GO:0045589)	0.27356	0.997865	5	IFNG	TNFSF4	NFATC2	CD46	RUNX1
regulation of vitamin D biosynthetic process (GO:0060556)	0.401685	0.997865	2	IFNG	SNAI1
regulation of epidermal cell differentiation (GO:0045604)	0.27356	0.997865	5	BMP4	ZFP36	ROCK2	DLL1	RUNX1
tube closure (GO:0060606)	0.232787	0.997865	7	TGFB2	DLC1	SEMA4C	COBL	GRHL2	PHACTR4	LRP6
positive regulation of cyclic nucleotide metabolic process (GO:0030801)	0.319645	0.997865	4	CXCL10	IAPP	CALM3	CALM1
negative regulation of protein complex assembly (GO:0031333)	0.253114	0.997865	8	PTGER4	PPM1A	IMPACT	KIF14	ULK1	LDLRAD4	SORL1	DACT1
L-cysteine metabolic process (GO:0046439)	0.401685	0.997865	2	AHCY	CDO1
regulation of interleukin-23 production (GO:0032667)	0.401685	0.997865	2	IFNG	MYD88
positive regulation of muscle cell differentiation (GO:0051149)	0.228111	0.997865	8	MYOG	MEF2A	BTG1	SMYD1	BNIP2	HIF1AN	MAPK14	CDON
establishment of skin barrier (GO:0061436)	0.319645	0.997865	4	MET	CLDN1	TP63	HRNR
negative regulation of transcription regulatory region DNA binding (GO:2000678)	0.319645	0.997865	4	HEY1	SOX11	PSEN1	ZNF675
response to type I interferon (GO:0034340)	0.401685	0.997865	2	SETD2	IFIT1
negative regulation of wound healing (GO:0061045)	0.267135	0.997865	6	EDN1	CD109	TFPI	FGF2	PHLDB2	CLASP2
nucleoside triphosphate metabolic process (GO:0009141)	0.238415	0.997865	4	CMPK1	ENPP1	CMPK2	AK4
formation of translation preinitiation complex (GO:0001731)	0.401685	0.997865	2	EIF2S3	DENR
positive regulation of macrophage activation (GO:0043032)	0.361117	0.997865	4	APP	IL33	ITGAM	TLR6
response to ATP (GO:0033198)	0.238415	0.997865	4	P2RX7	TRPC3	SSH1	HSP90B1
sympathetic nervous system development (GO:0048485)	0.319645	0.997865	4	FZD3	NF1	SOX11	PHOX2B
negative regulation of myotube differentiation (GO:0010832)	0.329794	0.997865	3	NOV	BDNF	BHLHE41
regulation of actin filament bundle assembly (GO:0032231)	0.236701	0.997865	6	PTGER4	ROCK2	SYNPO2	RDX	TSC1	PFN2
adenine nucleotide transport (GO:0051503)	0.401685	0.997865	2	SLC25A16	SLC25A4
positive regulation of dephosphorylation (GO:0035306)	0.236701	0.997865	6	ANKLE2	DLC1	CNEP1R1	MTMR9	CALM3	CALM1
positive regulation of RIG-I signaling pathway (GO:1900246)	0.401685	0.997865	2	ANKRD17	PUM2
regulation of fat cell proliferation (GO:0070344)	0.335925	0.997865	2	PID1	TFDP1
negative regulation of actin filament bundle assembly (GO:0032232)	0.27356	0.997865	5	DLC1	WASF2	MET	PHLDB2	CLASP2
regulation of macrophage derived foam cell differentiation (GO:0010743)	0.232787	0.997865	7	CRP	MSR1	MAPK9	ABCA5	ITGB3	ITGAV	CD36
histone lysine demethylation (GO:0070076)	0.308935	0.997865	5	KDM5A	KDM5B	KDM1B	JMJD1C	PHF8
positive regulation of translational initiation (GO:0045948)	0.308935	0.997865	5	DAZL	KHDRBS1	POLR2D	DAZ3	UHMK1
positive regulation of alpha-beta T cell activation (GO:0046635)	0.278564	0.997865	4	IL23A	TNFSF4	NKAP	GLI3
regulation of G0 to G1 transition (GO:0070316)	0.223054	0.997865	9	TFDP1	CBX5	RBBP4	TFDP2	APAF1	CHEK1	RBBP8	BRCA1	RNF2
respiratory chain complex IV assembly (GO:0008535)	0.267135	0.997865	6	COA4	SCO1	COX15	COX18	COX11	COX20
positive regulation of respiratory burst (GO:0060267)	0.464163	0.997865	2	CAMK1D	INSR
myeloid cell differentiation (GO:0030099)	0.217828	0.997865	10	PRDX3	DYRK3	SNRK	KAT6A	TET2	FLVCR1	IKZF1	INHBA	TIRAP	PTPN2
central nervous system neuron axonogenesis (GO:0021955)	0.401685	0.997865	2	EPHB1	PHOX2B
regulation of ion transmembrane transport (GO:0034765)	0.253114	0.997865	8	P2RX7	KCNJ10	KCNJ15	NEDD4L	AKAP6	ANO6	KCNJ2	KCNJ3
cytoplasmic translational initiation (GO:0002183)	0.379751	0.997865	3	EIF3M	EIF2S3	DENR
peptidyl-lysine methylation (GO:0018022)	0.319645	0.997865	4	SETD2	SETD7	SMYD2	METTL21A
regulation of reactive oxygen species metabolic process (GO:2000377)	0.212554	0.997865	11	TFAP2A	PID1	PDGFB	PDK3	SIRT5	CYP1B1	RIPK1	BRCA1	F2	MAPK14	TGFBR2
cellular response to fluid shear stress (GO:0071498)	0.379751	0.997865	3	HAS2	PKD2	MTSS1
chitin metabolic process (GO:0006030)	0.401685	0.997865	2	CHI3L2	CTBS
embryonic axis specification (GO:0000578)	0.278564	0.997865	4	SMAD2	FZD5	COBL	TDGF1
regulation of cell communication by electrical coupling involved in cardiac conduction (GO:1901844)	0.230434	0.997865	3	CALM3	CALM1	TRDN
vacuolar transport (GO:0007034)	0.232787	0.997865	7	TMEM50A	VPS13C	VPS53	TMEM50B	TMEM106B	ARSB	VTI1B
vascular endothelial growth factor signaling pathway (GO:0038084)	0.401685	0.997865	2	NUS1	GAB1
N-glycan processing (GO:0006491)	0.361117	0.997865	4	MAN1A2	MAN2A1	MGAT4A	ST8SIA2
negative regulation of blood vessel diameter (GO:0097756)	0.329794	0.997865	3	CRP	EDNRA	EDN1
recombinational repair (GO:0000725)	0.224299	0.997865	15	GEN1	MCM9	NSMCE2	RPA1	NUCKS1	LIG3	BRCA1	RAD54B	YY1	MMS22L	SFPQ	UBE2N	RBBP8	NABP1	POLK
mRNA methylation (GO:0080009)	0.230434	0.997865	3	METTL14	TRMT10C	TRMT61B
negative regulation of fatty acid biosynthetic process (GO:0045717)	0.329794	0.997865	3	ERLIN1	ERLIN2	BRCA1
presynaptic membrane assembly (GO:0097105)	0.279717	0.997865	3	NLGN1	NLGN2	IL1RAPL1
negative regulation of gene expression, epigenetic (GO:0045814)	0.267135	0.997865	6	CREBZF	RBBP4	AEBP2	MTF2	TRIM27	PPM1D
'de novo' posttranslational protein folding (GO:0051084)	0.26019	0.997865	7	HSPA5	ENTPD5	HSPA4L	DNAJB14	HSPA2	UGGT2	UGGT1
pigment granule transport (GO:0051904)	0.361117	0.997865	4	MKKS	RAB27A	RAB27B	BBS7
internal peptidyl-lysine acetylation (GO:0018393)	0.298461	0.997865	6	NAA50	KAT2B	TEX30	KAT6B	KAT6A	MSL3
embryonic camera-type eye morphogenesis (GO:0048596)	0.335925	0.997865	2	TFAP2A	LRP6
heart morphogenesis (GO:0003007)	0.232528	0.997865	11	ACVR1	HEYL	TGFB2	NIPBL	HEY1	FLRT2	INSR	DLC1	TBX20	EPHB4	BMPR1A
regulation of integrin-mediated signaling pathway (GO:2001044)	0.329794	0.997865	3	PRKD1	PHACTR4	CD177
negative regulation of cell adhesion mediated by integrin (GO:0033629)	0.401685	0.997865	2	PDE3B	CYP1B1
lipoxin biosynthetic process (GO:2001301)	0.335925	0.997865	2	ALOX15	ALOX5AP
protein K11-linked deubiquitination (GO:0035871)	0.279717	0.997865	3	OTUD7B	TNFAIP3	OTUD3
regulation of focal adhesion assembly (GO:0051893)	0.217828	0.997865	10	ROCK2	RCC2	DLC1	TSC1	TEK	PHLDB2	GPM6B	PPM1F	CORO1C	CLASP2
cellular response to iron ion (GO:0071281)	0.335925	0.997865	2	TFAP2A	B2M
tRNA methylation (GO:0030488)	0.298461	0.997865	6	TRMT10C	TRMT5	THUMPD3	TRDMT1	TRMT61B	ALKBH8
protein autoubiquitination (GO:0051865)	0.212554	0.997865	10	RNF11	RNF213	TRIM17	TRAF6	TRIM37	UBE3A	UBE2A	BRCA1	KLHL24	RNF141	2019-03-05
regulation of bicellular tight junction assembly (GO:2000810)	0.319645	0.997865	4	TJP1	ROCK2	SNAI1	RUNX1
regulation of interleukin-2 production (GO:0032663)	0.308935	0.997865	5	TRAF6	TNFAIP3	MAP3K7	HAVCR2	RUNX1
membrane fusion involved in viral entry into host cell (GO:0039663)	0.401685	0.997865	2	CXCR4	PPIA
heart looping (GO:0001947)	0.27892	0.997865	8	MKKS	TBX20	MICAL2	NPHP3	BBS7	PKD2	DLL1	TGFBR2
fatty acid elongation, polyunsaturated fatty acid (GO:0034626)	0.401685	0.997865	2	ELOVL2	ELOVL6
molybdopterin cofactor metabolic process (GO:0043545)	0.401685	0.997865	2	NFS1	MBIP
regulation of immunoglobulin mediated immune response (GO:0002889)	0.335925	0.997865	2	TNFSF4	CD226
response to glucocorticoid (GO:0051384)	0.236701	0.997865	6	ZFP36	BCL2L11	SLIT3	NR3C1	SSTR2	ZFP36L2
regulation of T cell chemotaxis (GO:0010819)	0.279717	0.997865	3	CXCL10	ADAM17	CXCL13
histone H4-K16 acetylation (GO:0043984)	0.238415	0.997865	4	KMT2A	PHF20	MSL2	MSL3
negative regulation of endothelial cell proliferation (GO:0001937)	0.26019	0.997865	7	AIMP1	RGCC	CAV2	ATOH8	ATP5A1	KRIT1	NF1
negative regulation of double-strand break repair (GO:2000780)	0.239114	0.997865	5	KLHL15	HMGA2	TWIST1	TRIP12	POLK
negative regulation of STAT cascade (GO:1904893)	0.269891	0.997865	9	LEPROT	FLRT2	FLRT3	LRRTM4	LRRC4	LRRC4C	LRRC66	ASPN	SOCS4
C21-steroid hormone metabolic process (GO:0008207)	0.34488	0.997865	5	STARD3NL	SRD5A1	FDX1	AKR1C2	AKR1C4
cell-cell junction maintenance (GO:0045217)	0.279717	0.997865	3	NLGN2	F2R	CD177
regulation of catenin import into nucleus (GO:0035412)	0.239114	0.997865	5	SEMA5A	BAMBI	GNAQ	EGFR	DACT1
establishment of mitochondrion localization, microtubule-mediated (GO:0034643)	0.335925	0.997865	2	RHOT1	LRPPRC
positive regulation of metanephros development (GO:0072216)	0.464163	0.997865	2	MYC	PDGFB
cellular response to hexose stimulus (GO:0071331)	0.308935	0.997865	5	UNC13B	KCNB1	TRA2B	PDK3	ZNF236
positive regulation of cardiac muscle cell differentiation (GO:2000727)	0.279717	0.997865	3	BMP4	EDN1	AKAP6
positive regulation of insulin secretion (GO:0032024)	0.28844	0.997865	7	NLGN2	SLC30A8	POLR2D	GCG	TRH	TM7SF3	MCU
positive regulation of amyloid precursor protein catabolic process (GO:1902993)	0.379751	0.997865	3	APP	ROCK2	CLU
microtubule polymerization (GO:0046785)	0.330423	0.997865	6	ZNF207	SLAIN2	TPPP	TUBGCP4	FGF13	CLASP2
regulation of cardiac muscle contraction by calcium ion signaling (GO:0010882)	0.308935	0.997865	5	ATP2A2	ATP1A2	CALM3	CALM1	SLC8A1
histone H3 deacetylation (GO:0070932)	0.379751	0.997865	3	SFPQ	HDAC2	SMARCAD1
DNA replication checkpoint (GO:0000076)	0.361117	0.997865	4	TOPBP1	DNA2	RAD9B	ZNF830
quinone metabolic process (GO:1901661)	0.279717	0.997865	3	AKR1C2	AKR1C4	CBR4
regulation of cellular senescence (GO:2000772)	0.236701	0.997865	6	RBL1	CDK6	AKT3	ZKSCAN3	HMGA2	TWIST1
cGMP-mediated signaling (GO:0019934)	0.464163	0.997865	2	KCNC2	CD36
epoxygenase P450 pathway (GO:0019373)	0.308935	0.997865	5	CYP2C8	EPHX2	CYP1B1	CYP2C19	CYP4F12
positive regulation of biosynthetic process (GO:0009891)	0.34488	0.997865	5	MTPN	CREB1	RAB27A	CD36	TLR6
reproductive system development (GO:0061458)	0.401685	0.997865	2	SRD5A1	LRRC6
endoderm formation (GO:0001706)	0.27892	0.997865	8	EOMES	DUSP2	SETD2	COL11A1	TBX20	HMGA2	ITGAV	INHBA
response to granulocyte macrophage colony-stimulating factor (GO:0097012)	0.335925	0.997865	2	ZFP36	ZFP36L2
DNA ligation involved in DNA repair (GO:0051103)	0.379751	0.997865	3	LIG4	LIG3	HMGB1
cytoplasmic sequestering of NF-kappaB (GO:0007253)	0.401685	0.997865	2	PSMD10	G3BP2
phosphatidylglycerol metabolic process (GO:0046471)	0.34488	0.997865	5	CDS1	PLA2G12A	PLA2G2D	PLA2G4D	LPCAT1
regulation of posttranscriptional gene silencing (GO:0060147)	0.226049	0.997865	12	NUP93	NUP205	AGO1	TPR	POLR2D	NUP35	POLR2F	NUP43	RAE1	TNRC6A	NUP37	PUM2
negative regulation of histone modification (GO:0031057)	0.379751	0.997865	3	SET	TWIST1	BRCA1
regulation of cardiac muscle hypertrophy (GO:0010611)	0.308935	0.997865	5	MEF2A	MTPN	RGS2	BMP10	EDN1
fatty acid elongation, saturated fatty acid (GO:0019367)	0.401685	0.997865	2	ELOVL2	ELOVL6
regulation of gene silencing by RNA (GO:0060966)	0.226049	0.997865	12	NUP93	NUP205	AGO1	TPR	POLR2D	NUP35	POLR2F	NUP43	RAE1	TNRC6A	NUP37	PUM2
regulation of glomerular filtration (GO:0003093)	0.335925	0.997865	2	F2R	PDGFB
cortical actin cytoskeleton organization (GO:0030866)	0.308935	0.997865	5	STRIP1	WIPF1	ROCK2	WIPF2	LLGL1
negative regulation of cytokine secretion (GO:0050710)	0.246093	0.997865	9	PTGER4	RGCC	BTN2A2	C5AR2	TLR8	PTPN22	TLR6	TRIM27	LGR4
microtubule anchoring at microtubule organizing center (GO:0072393)	0.329794	0.997865	3	KIF3A	BICD1	BICD2
negative regulation of cAMP-dependent protein kinase activity (GO:2000480)	0.464163	0.997865	2	PRKAR1A	PKIA
regulation of fibroblast growth factor receptor signaling pathway (GO:0040036)	0.27356	0.997865	5	DSTYK	SPRY4	SPRY3	SPRY1	SULF2
bile acid biosynthetic process (GO:0006699)	0.298461	0.997865	6	CYP39A1	AMACR	OSBPL3	AKR1C4	ABCB11	CYP8B1
spliceosomal tri-snRNP complex assembly (GO:0000244)	0.379751	0.997865	3	SART3	SRSF10	SRSF12
AMP metabolic process (GO:0046033)	0.401685	0.997865	2	ADSL	AK4
positive regulation of receptor binding (GO:1900122)	0.335925	0.997865	2	BDNF	B2M
determination of liver left/right asymmetry (GO:0071910)	0.335925	0.997865	2	NPHP3	PKD2
intracellular pH elevation (GO:0051454)	0.335925	0.997865	2	BCL2	NOX1
response to cAMP (GO:0051591)	0.246093	0.997865	9	HCN4	CRHBP	RAPGEF2	AKAP6	AHR	PKD2	JUNB	DUOX2	HCN1
response to gamma radiation (GO:0010332)	0.298461	0.997865	6	YAP1	PRKAA1	DCUN1D3	MYC	LIG4	TP63
ESCRT III complex disassembly (GO:1904903)	0.279717	0.997865	3	VTA1	VPS4A	CHMP2B
response to hydroperoxide (GO:0033194)	0.464163	0.997865	2	PRKD1	STX2
protein polymerization (GO:0051258)	0.239216	0.997865	10	COBLL1	FGG	MSRB2	ZNF207	COBL	ANG	TPPP	FGF13	UBE2K	WASF3
regulation of transcription regulatory region DNA binding (GO:2000677)	0.298461	0.997865	6	HEY1	TRAF6	HMGA2	TWIST1	SOX11	ZNF675
cellular response to unfolded protein (GO:0034620)	0.34488	0.997865	5	HSPA5	HSPA4L	HSPA2	TM7SF3	OPTN
response to X-ray (GO:0010165)	0.278564	0.997865	4	NIPBL	LIG4	NUCKS1	TP63
protein complex localization (GO:0031503)	0.34488	0.997865	5	ICK	IFT74	TTC30A	BIRC5	ALPK3
regulation of aspartic-type endopeptidase activity involved in amyloid precursor protein catabolic process (GO:1902959)	0.464163	0.997865	2	ROCK2	SORL1
nuclear import (GO:0051170)	0.224299	0.997865	15	IPO11	RANBP3	IPO7	NUP93	NPAP1	MCM3AP	SNRPD1	TPR	SNRPE	SNRPD3	NUP62CL	HNRNPA1	RAE1	TNPO3	KPNB1
DNA strand elongation involved in DNA replication (GO:0006271)	0.319645	0.997865	4	GINS1	GINS4	LIG4	LIG3
viral release from host cell (GO:0019076)	0.335925	0.997865	2	VPS4A	PPIA
nucleobase metabolic process (GO:0009112)	0.335925	0.997865	2	TTR	UPRT
regulation of adaptive immune response (GO:0002819)	0.238415	0.997865	4	TNFSF4	ALOX15	TRIM27	SAMSN1
positive regulation of protein import (GO:1904591)	0.278564	0.997865	4	TPR	ZIC1	ARHGEF5	RBM22
cellular response to lipoteichoic acid (GO:0071223)	0.335925	0.997865	2	MAPK14	TIRAP
embryonic heart tube morphogenesis (GO:0003143)	0.246093	0.997865	9	ACVR1	MKKS	TBX20	MICAL2	NPHP3	BBS7	PKD2	DLL1	TGFBR2
positive regulation of phosphatidylinositol 3-kinase activity (GO:0043552)	0.267135	0.997865	6	PDGFB	CCR7	TEK	PRKD1	FPR2	FGF2
axonal transport (GO:0098930)	0.27892	0.997865	8	AP3M2	DST	KIF3A	BLOC1S2	AP3B1	HAP1	HIF1A	PAFAH1B1
phosphatidylinositol acyl-chain remodeling (GO:0036149)	0.319645	0.997865	4	PLA2G16	PLA2G12A	PLA2G2D	PLA2G4D
mitochondrial membrane organization (GO:0007006)	0.239114	0.997865	5	COX18	BNIP3	BCL2	MFN2	SLC25A4
regulation of RIG-I signaling pathway (GO:0039535)	0.319645	0.997865	4	ANKRD17	BIRC2	BIRC3	PUM2
negative regulation of epithelial to mesenchymal transition (GO:0010719)	0.267135	0.997865	6	TGFB2	SFRP2	HPN	LDLRAD4	BMP5	PBLD
amino acid transmembrane transport (GO:0003333)	0.232787	0.997865	7	SLC7A6	SLC38A1	SLC36A2	SLC38A9	SLC36A4	SLC38A2	SLC38A4
protein neddylation (GO:0045116)	0.428834	0.997865	3	DCUN1D5	DCUN1D3	DCUN1D1
mitotic spindle assembly (GO:0090307)	0.261324	0.997865	10	MAP10	ZNF207	XIAP	BIRC5	TUBGCP4	KIF11	BIRC2	KPNB1	NAIP	BIRC3
positive regulation of glucose metabolic process (GO:0010907)	0.329794	0.997865	3	PPARGC1A	ARPP19	PTPN2
negative regulation of intrinsic apoptotic signaling pathway in response to DNA damage (GO:1902230)	0.236701	0.997865	6	SFRP2	SNAI1	ACKR3	TRIM32	CLU	CD44
positive regulation of interleukin-13 production (GO:0032736)	0.279717	0.997865	3	TSLP	IRF4	TNFSF4
regulation of synaptic transmission, glutamatergic (GO:0051966)	0.239216	0.997865	10	OR5T1	NLGN1	CACNG8	NLGN2	TSHZ3	OPHN1	NRXN1	ATP1A2	SHANK2	GRM1
regulation of cell junction assembly (GO:1901888)	0.278564	0.997865	4	TJP1	SNAI1	RAPGEF2	RUNX1
postsynapse assembly (GO:0099068)	0.329794	0.997865	3	NLGN1	NLGN2	NRXN1
ketone body metabolic process (GO:1902224)	0.279717	0.997865	3	BDH2	OXCT1	HMGCS2
positive regulation of cyclin-dependent protein kinase activity (GO:1904031)	0.298461	0.997865	6	PSMD10	CCNT2	CCNT1	PDGFB	CCNC	PROX1
long-term synaptic potentiation (GO:0060291)	0.308935	0.997865	5	SLC24A2	GRIN2A	TSHZ3	GRIN2B	SHANK2
negative regulation of glial cell proliferation (GO:0060253)	0.335925	0.997865	2	SOX11	DICER1
regulation of cardiac muscle cell action potential (GO:0098901)	0.236701	0.997865	6	HCN4	CXADR	SLMAP	ATP2A2	CTNNA3	FGF13
positive regulation of execution phase of apoptosis (GO:1900119)	0.279717	0.997865	3	FAP	DLC1	TP53BP2
positive regulation of muscle hypertrophy (GO:0014742)	0.238415	0.997865	4	MEF2A	MTPN	BMP10	EDN1
positive regulation of growth (GO:0045927)	0.224299	0.997865	15	PSMD10	MTPN	TGFB2	INSR	HPN	AKAP6	EGFR	PPM1F	RPS6KA3	ADAM17	SFRP2	BCL2	AGR2	FGFR1OP	TRIM32
negative regulation of platelet-derived growth factor receptor-beta signaling pathway (GO:2000587)	0.401685	0.997865	2	PDGFB	PTPN2
mitochondrial ribosome assembly (GO:0061668)	0.335925	0.997865	2	FASTKD2	MPV17L2
regulation of hormone biosynthetic process (GO:0046885)	0.401685	0.997865	2	HIF1A	TRERF1
regulation of mitochondrial membrane permeability involved in apoptotic process (GO:1902108)	0.401685	0.997865	2	STPG1	NAIF1
positive regulation of transporter activity (GO:0032411)	0.238415	0.997865	4	KMT2A	WNK3	SGK3	SGK2
import across plasma membrane (GO:0098739)	0.329794	0.997865	3	HCN4	ATP1A2	KCNJ3
negative regulation of homotypic cell-cell adhesion (GO:0034111)	0.279717	0.997865	3	RDX	CD9	PRKG1
negative regulation of cell development (GO:0010721)	0.361117	0.997865	4	PAX6	SORL1	FBN1	LTF
synaptic vesicle endocytosis (GO:0048488)	0.232787	0.997865	7	DNM3	NLGN1	SYT2	NLGN2	OPHN1	C2CD4A	STON2
positive regulation of protein glycosylation (GO:0060050)	0.335925	0.997865	2	ARFGEF1	ALG10B
urogenital system development (GO:0001655)	0.34488	0.997865	5	NUP93	BMP4	ITGA6	TBX18	EPHB3
regulation of bone remodeling (GO:0046850)	0.379751	0.997865	3	ITGB3	S1PR1	NF1
negative regulation of dendrite morphogenesis (GO:0050774)	0.401685	0.997865	2	NLGN1	RAPGEF2
fucose catabolic process (GO:0019317)	0.522595	0.997865	2	FUT6	FUT9
response to reactive oxygen species (GO:0000302)	0.219787	0.997865	13	MPV17L	GLRX2	PKD2	SOD2	EGFR	CAMKK2	PRDX3	MAPK9	FER	STK24	DLC1	MAPK1	CCR7
response to purine-containing compound (GO:0014074)	0.361117	0.997865	4	P2RX7	TRPC3	JUNB	DUOX2
calcium ion homeostasis (GO:0055074)	0.220417	0.997865	18	SLC24A2	CCL13	CD40	CALCB	EPHX2	ATP2B4	ATP2A2	HTR2C	ATP2B2	ATP2B1	ATP2C1	SLC8A1	TMEM165	CHERP	TRDN	PKHD1	STIM2	ATP13A3
negative regulation of protein import into nucleus (GO:0042308)	0.34488	0.997865	5	MDFIC	NOV	RAB23	NF1	PBLD
positive regulation of protein catabolic process (GO:0045732)	0.211689	0.997865	17	BARD1	NSF	UQCC2	RDX	TNFAIP3	NEDD4L	ASB11	IDE	SORL1	OAZ1	FOXO1	IFNG	APC	HECW1	ASB5	TRIM32	DACT1
positive regulation of hormone secretion (GO:0046887)	0.361117	0.997865	4	SNX4	EDN1	FGG	SOX11
negative regulation of cell-matrix adhesion (GO:0001953)	0.330423	0.997865	6	RCC2	DLC1	SEMA3E	PHLDB2	CORO1C	CLASP2
embryonic skeletal system morphogenesis (GO:0048704)	0.308935	0.997865	5	TFAP2A	TWIST1	SIX1	SOX11	TGFBR2
regulation of mRNA 3'-end processing (GO:0031440)	0.279717	0.997865	3	BARD1	NUDT21	NCBP2
positive regulation of protein binding (GO:0032092)	0.219787	0.997865	13	STPG1	APP	BDNF	AKTIP	SYAP1	PSEN1	TIRAP	BMP4	GNL3L	BAMBI	RAPGEF2	B2M	DACT1
fibroblast growth factor receptor signaling pathway (GO:0008543)	0.250525	0.997865	16	TIA1	NCBP2	FRS2	CBL	FGF2	GTF2F2	FLRT2	FGF9	ESRP2	FLRT3	ESRP1	POLR2D	POLR2F	MAPK1	HNRNPA1	FGF10
semaphorin-plexin signaling pathway (GO:0071526)	0.232787	0.997865	7	SEMA4A	SEMA3C	SEMA4C	SEMA3E	SEMA4F	MET	PLXNA3
positive regulation of tumor necrosis factor superfamily cytokine production (GO:1903557)	0.317347	0.997865	7	IFNG	IL23A	TWIST1	RIPK1	CLU	TLR3	TIRAP
positive regulation of spindle checkpoint (GO:0090232)	0.464163	0.997865	2	GEN1	TPR
positive regulation of chemokine production (GO:0032722)	0.228111	0.997865	8	IL33	ADAM17	TSLP	TWIST1	EIF2AK2	HIF1A	TLR3	TIRAP
ventricular trabecula myocardium morphogenesis (GO:0003222)	0.464163	0.997865	2	TGFB2	BMPR1A
mRNA splice site selection (GO:0006376)	0.236701	0.997865	6	YTHDC1	SRSF1	SRSF5	SLU7	SRSF10	SRSF12
negative regulation of morphogenesis of an epithelium (GO:1905331)	0.329794	0.997865	3	BMP4	PHLDB2	CLASP2
regulation of dendritic spine development (GO:0060998)	0.28844	0.997865	7	NLGN1	SIPA1L1	LLPH	PSEN1	PDLIM5	CPEB3	SHANK2
heterochromatin assembly (GO:0031507)	0.464163	0.997865	2	HELLS	HMGA2
protein prenylation (GO:0018342)	0.279717	0.997865	3	PTAR1	CHM	CHML
regulation of protein ADP-ribosylation (GO:0010835)	0.464163	0.997865	2	KAT2B	IFNG
dendritic cell chemotaxis (GO:0002407)	0.319645	0.997865	4	CXCR4	CCR7	HMGB1	PIK3CG
positive regulation of cellular component movement (GO:0051272)	0.308935	0.997865	5	ADAM17	TUBB2B	TWIST1	CCR7	TRIM32
regulation of cyclic-nucleotide phosphodiesterase activity (GO:0051342)	0.401685	0.997865	2	CALM3	CALM1
regulation of cellular component movement (GO:0051270)	0.261324	0.997865	10	PKHD1	ADAM17	CDK6	ERBB3	ROCK2	ACTN1	CD9	ZSWIM6	MEMO1	EGFR
negative regulation of cardiac muscle cell differentiation (GO:2000726)	0.401685	0.997865	2	FRS2	SOX6
positive regulation of extracellular matrix organization (GO:1903055)	0.329794	0.997865	3	RGCC	COLGALT1	CLASP2
negative regulation of anoikis (GO:2000811)	0.278564	0.997865	4	ITGB1	PTRH2	BCL2	ZNF304
Golgi ribbon formation (GO:0090161)	0.329794	0.997865	3	MYO18A	OPTN	TMED5
positive regulation of DNA replication (GO:0045740)	0.253114	0.997865	8	BMP4	INSR	PDGFC	PDGFB	DNA2	EGFR	BMP5	FGF10
cardiac atrium development (GO:0003230)	0.401685	0.997865	2	NPHP3	DAND5
clathrin-dependent endocytosis (GO:0072583)	0.223054	0.997865	9	NLGN1	SYT2	NLGN2	OPHN1	C2CD4A	AP2B1	STON2	FNBP1L	DLL1
regulation of protein localization to membrane (GO:1905475)	0.361117	0.997865	4	VPS4A	STX7	VTI1B	APPL1
cellular response to magnesium ion (GO:0071286)	0.335925	0.997865	2	SLC41A1	ANK3
phosphate ion transmembrane transport (GO:0035435)	0.401685	0.997865	2	SLC20A2	XPR1
fibrinolysis (GO:0042730)	0.319645	0.997865	4	FGG	PLAUR	PLG	F2
mitochondrion transport along microtubule (GO:0047497)	0.379751	0.997865	3	RHOT1	HIF1A	LRPPRC
lung epithelium development (GO:0060428)	0.464163	0.997865	2	GRHL2	FGF10
negative regulation of JAK-STAT cascade (GO:0046426)	0.284057	0.997865	10	LEPROT	FLRT2	FLRT3	LRRTM4	LRRC4	LRRC4C	LRRC66	ASPN	SOCS4	PTPN2
histone H2A monoubiquitination (GO:0035518)	0.361117	0.997865	4	PCGF5	PCGF3	TRIM37	RNF2
release of sequestered calcium ion into cytosol (GO:0051209)	0.330423	0.997865	6	F2R	HTR2C	CCR7	PKD2	FGF2	CHERP
positive regulation of erythrocyte differentiation (GO:0045648)	0.34488	0.997865	5	INHBA	FOXO3	MAPK14	HIF1A	ACVR2A
regulation of smooth muscle cell apoptotic process (GO:0034391)	0.464163	0.997865	2	IFNG	LRP6
postsynaptic membrane organization (GO:0001941)	0.319645	0.997865	4	NLGN1	NLGN2	MUSK	NRXN1
regulation of lipid transport (GO:0032368)	0.464163	0.997865	2	ITGB3	ITGAV
negative regulation of NF-kappaB import into nucleus (GO:0042347)	0.319645	0.997865	4	PSMD10	PPM1A	NOV	G3BP2
spindle assembly checkpoint (GO:0071173)	0.361117	0.997865	4	CENPF	APC	TPR	ZNF207
protein localization to endosome (GO:0036010)	0.464163	0.997865	2	ACAP2	TMEM30A
cellular response to cAMP (GO:0071320)	0.26019	0.997865	7	HCN4	CRHBP	RAPGEF2	AKAP6	AHR	PKD2	HCN1
positive regulation of epithelial cell apoptotic process (GO:1904037)	0.319645	0.997865	4	CD40	PRKCI	RGCC	ANO6
cellular sodium ion homeostasis (GO:0006883)	0.278564	0.997865	4	ATP1B4	NEDD4L	ATP1A2	SLC8A1
L-alanine transport (GO:0015808)	0.401685	0.997865	2	SLC36A2	SLC36A4
chondroitin sulfate catabolic process (GO:0030207)	0.428834	0.997865	3	VCAN	IDS	ARSB
regulation of sensory perception (GO:0051931)	0.464163	0.997865	2	F2R	MGLL
positive regulation of peptide secretion (GO:0002793)	0.253114	0.997865	8	UNC13B	TGFB2	FGG	MYO18A	ANG	MYH10	PPIA	EXPH5
peptidyl-lysine trimethylation (GO:0018023)	0.361117	0.997865	4	SETD2	KMT2A	TET3	TET2
modulation by symbiont of host cellular process (GO:0044068)	0.401685	0.997865	2	KPNA4	KPNB1
cellular response to low-density lipoprotein particle stimulus (GO:0071404)	0.428834	0.997865	3	ITGB1	CD9	CD36
angiogenesis involved in wound healing (GO:0060055)	0.464163	0.997865	2	ITGB3	PRCP
positive regulation of autophagosome maturation (GO:1901098)	0.335925	0.997865	2	FYCO1	SMCR8
ketone body biosynthetic process (GO:0046951)	0.464163	0.997865	2	BDH2	HMGCS2
mitral valve development (GO:0003174)	0.401685	0.997865	2	ACVR1	BMPR1A
negative regulation of tumor necrosis factor superfamily cytokine production (GO:1903556)	0.28844	0.997865	7	C5AR2	TNFAIP3	PTPN22	IRAK3	TRIM27	LTF	HAVCR2
negative regulation of exocytosis (GO:0045920)	0.464163	0.997865	2	IL1RAPL1	RAB33B
regulation of lamellipodium morphogenesis (GO:2000392)	0.329794	0.997865	3	RREB1	CD44	CORO1C
positive regulation of protein localization to centrosome (GO:1904781)	0.335925	0.997865	2	APC	BICD1
replication fork protection (GO:0048478)	0.401685	0.997865	2	DONSON	ZNF830
entrainment of circadian clock by photoperiod (GO:0043153)	0.27356	0.997865	5	PPP1CB	PPP1CC	PER3	CRY1	SIK1
cellular amide metabolic process (GO:0043603)	0.256914	0.997865	13	CPM	ASAH1	ASAH2	MME	ORMDL1	FUT6	NLN	PDZD11	ORMDL2	CPD	NAPEPLD	CPE	AASDHPPT
negative regulation of interleukin-6 secretion (GO:1900165)	0.335925	0.997865	2	C5AR2	PTPN22
enteric nervous system development (GO:0048484)	0.335925	0.997865	2	PHOX2B	PHACTR4
determination of heart left/right asymmetry (GO:0061371)	0.246093	0.997865	9	MKKS	TBX20	MICAL2	NPHP3	BBS7	PKD2	DLL1	DAND5	TGFBR2
7-methylguanosine RNA capping (GO:0009452)	0.317347	0.997865	7	NCBP2	RNMT	POLR2D	POLR2F	GTF2F2	GTF2H5	CMTR2
response to hydrogen peroxide (GO:0042542)	0.319295	0.997865	9	PRDX3	IMPACT	STK24	DLC1	TNFAIP3	CYP1B1	GLRX2	MAP3K5	MAPK13
negative regulation of MyD88-independent toll-like receptor signaling pathway (GO:0034128)	0.401685	0.997865	2	TICAM2	TLR3
long term synaptic depression (GO:0060292)	0.335925	0.997865	2	SLC24A2	SHANK2
regulation of nitric-oxide synthase activity (GO:0050999)	0.27892	0.997865	8	NUS1	ATP2B4	NOSIP	ZDHHC21	AGTR2	CALM1	HIF1A	EGFR
skeletal system morphogenesis (GO:0048705)	0.28844	0.997865	7	TFAP2A	CYP26B1	HHIP	SIX1	SOX11	RAB33B	LTF
negative regulation of muscle hypertrophy (GO:0014741)	0.401685	0.997865	2	RGS2	BMP10
negative regulation of pathway-restricted SMAD protein phosphorylation (GO:0060394)	0.279717	0.997865	3	SNX25	LDLRAD4	PBLD
positive regulation of myeloid leukocyte mediated immunity (GO:0002888)	0.522595	0.997865	2	ITGAM	CD177
regulation of ERAD pathway (GO:1904292)	0.464163	0.997865	2	USP13	USP25
synaptic vesicle recycling (GO:0036465)	0.232787	0.997865	7	NLGN1	SYT2	NLGN2	OPHN1	C2CD4A	STON2	RAB5A
regulation of organelle assembly (GO:1902115)	0.284057	0.997865	10	SENP6	DYNC2LI1	AKAP13	ATG3	PIKFYVE	RDX	STAM	RAB5A	RAB33B	ATG5
regulation of fibrinolysis (GO:0051917)	0.428834	0.997865	3	FAP	PLG	F2
regulation of ubiquitin-protein transferase activity (GO:0051438)	0.28844	0.997865	7	ARRDC4	ZYG11B	DCUN1D5	DCUN1D3	ARRDC3	DCUN1D1	UBE2N
regulation of DNA repair (GO:0006282)	0.305381	0.997865	8	EYA1	EYA4	UBE2N	UBE2V2	TRIP12	BRCA1	EGFR	FGF10
positive regulation of monocyte chemotaxis (GO:0090026)	0.361117	0.997865	4	CXCL10	ANO6	HMGB1	FPR2
positive regulation of production of miRNAs involved in gene silencing by miRNA (GO:1903800)	0.464163	0.997865	2	BMP4	EGFR
regulation of nitrogen compound metabolic process (GO:0051171)	0.464163	0.997865	2	ROCK2	CACYBP
negative regulation of microtubule depolymerization (GO:0007026)	0.40249	0.997865	4	APC	FGF13	TTBK2	CLASP2
chordate embryonic development (GO:0043009)	0.245444	0.997865	12	ARNT2	SIX4	ALDH1A2	POLR2D	LIG4	PROX1	BRCA1	PKD2	GRHL2	SULF2	BMP5	DACT1
activation of transmembrane receptor protein tyrosine kinase activity (GO:0007171)	0.335925	0.997865	2	ANGPT1	PRLR
extrinsic apoptotic signaling pathway (GO:0097191)	0.248862	0.997865	14	MOAP1	TGFB2	DCC	INHBA	HIPK1	IFNG	ERBB3	BLOC1S2	BCL2	FAS	ITGAV	RIPK1	TLR3	APPL1
regulation of cartilage development (GO:0061035)	0.278564	0.997865	4	BMP4	TRPS1	SOX6	SOX5
regulation of double-strand break repair via homologous recombination (GO:0010569)	0.330423	0.997865	6	SETD2	PPP4R2	KLHL15	FIGNL1	CHEK1	POLK
regulation of tumor necrosis factor-mediated signaling pathway (GO:0010803)	0.245444	0.997865	12	ADAM17	SPPL2A	TAX1BP1	TNFAIP3	RIPK1	TRAF1	HIPK1	RFFL	ZNF675	BIRC2	PTPN2	BIRC3
positive regulation of lamellipodium morphogenesis (GO:2000394)	0.401685	0.997865	2	RREB1	CORO1C
cardiac muscle cell-cardiac muscle cell adhesion (GO:0086042)	0.401685	0.997865	2	CXADR	CTNNA3
zinc II ion transmembrane transport (GO:0071577)	0.381054	0.997865	5	SLC30A6	SLC30A8	SLC30A5	SLC39A6	SLC39A14
epithelial cell-cell adhesion (GO:0090136)	0.329794	0.997865	3	NOV	THBS4	VCL
Notch signaling pathway (GO:0007219)	0.226049	0.997865	12	NOTCH2	HEYL	KAT2B	HEY1	MAML2	MYC	SNAI1	NRARP	PSEN1	ZNF423	DLL1	MIB1
regulation of neuroblast proliferation (GO:1902692)	0.279717	0.997865	3	FZD3	NF1	DISC1
DNA-dependent DNA replication (GO:0006261)	0.245444	0.997865	12	GINS1	WDHD1	PURA	ORC6	RFC1	GINS4	ORC2	RPA1	MCMBP	TOPBP1	DNA2	POLK
peptide transport (GO:0015833)	0.269891	0.997865	9	ARRDC4	SNX4	CENPF	CALCRL	LMAN2L	RAB38	SCAMP1	LRP1B	HSP90B1
prostanoid biosynthetic process (GO:0046457)	0.428834	0.997865	3	EDN1	PTGS2	PTGS1
protein localization to nucleus (GO:0034504)	0.274227	0.997865	19	IPO11	RANBP3	TOR1AIP2	SIX1	GPN2	IPO7	TOR1AIP1	NUP93	BMP4	NPAP1	PIKFYVE	MCM3AP	SIX4	CNEP1R1	NUP62CL	TAF3	RAE1	TNPO3	KPNB1
nonribosomal peptide biosynthetic process (GO:0019184)	0.379751	0.997865	3	GCLC	BDH2	GCLM
positive regulation of protein localization to plasma membrane (GO:1903078)	0.319295	0.997865	9	DPP10	ITGB1	PRKCI	CNST	IFNG	KIF5B	WNK3	AGR2	EGFR
posttranscriptional regulation of gene expression (GO:0010608)	0.217828	0.997865	10	MTPN	APP	YTHDC1	GCNT2	RC3H1	TSC1	FOXO3	EIF4E	METAP1	PUM2
arachidonate transport (GO:1903963)	0.464163	0.997865	2	BDKRB2	NMUR2
protein targeting to peroxisome (GO:0006625)	0.278564	0.997865	4	PEX19	PEX3	PEX2	PEX26
regulation of response to DNA damage stimulus (GO:2001020)	0.27892	0.997865	8	SMG1	BCLAF1	MYC	SMYD2	CRY1	UBE2N	UBE2V2	HMGA2
regulation of lipopolysaccharide-mediated signaling pathway (GO:0031664)	0.40249	0.997865	4	SCARB2	TRIM5	CD180	LTF
poly(A)+ mRNA export from nucleus (GO:0016973)	0.428834	0.997865	3	NUP93	ZC3H11A	THOC2
negative regulation of response to endoplasmic reticulum stress (GO:1903573)	0.34488	0.997865	5	DNAJC3	USP25	SYVN1	TXNDC12	CLU
glycoside metabolic process (GO:0016137)	0.476439	0.997865	3	AKR1C2	AKR1C4	CBR4
regulation of neurogenesis (GO:0050767)	0.265425	0.997865	12	YAP1	NLGN1	BHLHB9	BDNF	LIG4	SIX1	PAX6	SOX11	TRIM32	SORL1	DLL1	YWHAG
protein transport along microtubule (GO:0098840)	0.319645	0.997865	4	ICK	IFT74	TTC30A	ALPK3
regulation of smoothened signaling pathway (GO:0008589)	0.27892	0.997865	8	EVC	KCTD21	HHIP	ZIC1	RORA	BTRC	GLI3	KCTD6
neural tube closure (GO:0001843)	0.34672	0.997865	7	TGFB2	DLC1	SEMA4C	COBL	GRHL2	PHACTR4	LRP6
cardiac muscle cell action potential involved in contraction (GO:0086002)	0.362772	0.997865	6	GJC1	GJA1	NEDD4L	FGF12	KCNJ2	SCN1A
nuclear envelope reassembly (GO:0031468)	0.40249	0.997865	4	ANKLE2	UBXN2B	REEP3	VPS4A
nucleic acid-templated transcription (GO:0097659)	0.21786	0.997865	16	MEF2A	CREBZF	NCOA1	THRB	ASH2L	BAZ2B	NR3C1	ESR1	MLF1	THAP1	NR4A2	POLR3A	TAF1B	MED20	POLR2D	POLR2F
positive regulation of transmembrane receptor protein serine/threonine kinase signaling pathway (GO:0090100)	0.22703	0.997865	17	ACVR1	SMAD2	GDF11	TGFB2	BMP10	SOX11	INHBA	GDF5	ACVR2A	CYR61	BMP5	NUP93	BMP4	ADAM17	ZNF423	RNF111	BMPR1A
positive regulation of stress fiber assembly (GO:0051496)	0.305381	0.997865	8	RGCC	GPR65	LPAR1	PPM1E	ARHGEF5	PPM1F	CTGF	PFN2
response to thyroid hormone (GO:0097066)	0.329794	0.997865	3	HPN	RDX	CTSS
response to histamine (GO:0034776)	0.279717	0.997865	3	GABRB3	GABRB2	GABRB1
early endosome to Golgi transport (GO:0034498)	0.464163	0.997865	2	SNX2	RAB6A
transepithelial transport (GO:0070633)	0.464163	0.997865	2	CXADR	RHCG
positive regulation of alpha-beta T cell proliferation (GO:0046641)	0.428834	0.997865	3	IL23A	TNFSF4	TGFBR2
positive regulation of immunoglobulin production (GO:0002639)	0.443334	0.997865	4	PAXIP1	TFRC	TNFSF4	POLR2D
negative regulation of B cell activation (GO:0050869)	0.361117	0.997865	4	RC3H1	TNFAIP3	INHBA	SAMSN1
sphingolipid metabolic process (GO:0006665)	0.242513	0.997865	23	CERS3	CERS4	ASAH1	SAMD8	ASAH2	CERS6	PPM1L	ELOVL2	ORMDL1	ELOVL6	SGMS2	TEX2	FUT6	STS	GM2A	SPTLC3	ORMDL2	ARSK	ACER3	SERINC1	PRKD1	SPTSSA	ARSB
positive regulation of protein autophosphorylation (GO:0031954)	0.34488	0.997865	5	PDGFC	NEK10	PDGFB	CALM3	CALM1
negative regulation of epidermal growth factor-activated receptor activity (GO:0007175)	0.428834	0.997865	3	CBL	SOCS4	SNX6
transcription initiation from RNA polymerase I promoter (GO:0006361)	0.34672	0.997865	7	TAF1D	TAF1B	POLR1B	TWISTNB	TAF1A	POLR2F	GTF2H5
positive regulation of synaptic transmission (GO:0050806)	0.248862	0.997865	14	UNC13B	SLC24A2	APP	NLGN1	NLGN2	TSHZ3	CLSTN2	NRXN1	CLSTN1	GRIN2B	CACNG8	GRIN2A	HAP1	SHANK2
dendrite morphogenesis (GO:0048813)	0.317347	0.997865	7	MEF2A	CTNND2	SDC2	TMEM106B	EPHB1	SHANK2	EPHB3
mRNA modification (GO:0016556)	0.428834	0.997865	3	METTL14	TRMT10C	TRMT61B
regulation of cellular amide metabolic process (GO:0034248)	0.332347	0.997865	8	EEF1A1	MTPN	APP	SAMD8	TSC1	FOXO3	EIF4E	METAP1
regulation of type I interferon production (GO:0032479)	0.275684	0.997865	17	CRCP	TNFAIP3	PTPN22	TIRAP	TBK1	POLR3A	DHX33	POLR3D	DHX36	POLR3E	POLR3F	TAX1BP1	POLR3G	POLR2F	POLR3K	TRIM32	MYD88
cellular response to superoxide (GO:0071451)	0.522595	0.997865	2	PRDX2	SOD2
positive regulation of ubiquitin-protein transferase activity (GO:0051443)	0.28844	0.997865	7	ARRDC4	RAB1A	DCUN1D5	DCUN1D3	ARRDC3	DCUN1D1	UBE2N
response to nutrient levels (GO:0031667)	0.40249	0.997865	4	PRKAA1	PRKAA2	KCNB1	ULK1
regulation of DNA recombination (GO:0000018)	0.34672	0.997865	7	SETD2	PPP4R2	MSH3	FIGNL1	CHEK1	SMARCAD1	IL7R
transcription from RNA polymerase I promoter (GO:0006360)	0.34672	0.997865	7	TAF1D	TAF1B	POLR1B	TWISTNB	TAF1A	POLR2F	GTF2H5
bone development (GO:0060348)	0.376372	0.997865	7	PTGER4	TFAP2A	AKAP13	CYP26B1	GNAS	SULF2	LTF
GTP metabolic process (GO:0046039)	0.308935	0.997865	5	NFS1	RAB23	GNAI3	MBIP	AK4
inactivation of MAPK activity (GO:0000188)	0.483281	0.997865	4	RGS4	DUSP2	DUSP3	MBIP
sphingosine-1-phosphate signaling pathway (GO:0003376)	0.335925	0.997865	2	S1PR1	S1PR2
positive regulation of ATPase activity (GO:0032781)	0.253114	0.997865	8	PLSCR1	DNAJC10	TOR1AIP2	DNAJC9	DYNLL2	TOR1AIP1	PFN2	FGF10
regulation of mRNA export from nucleus (GO:0010793)	0.335925	0.997865	2	SETD2	IWS1
atrial cardiac muscle cell to AV node cell signaling (GO:0086026)	0.464163	0.997865	2	GJC1	GJA1
cellular potassium ion homeostasis (GO:0030007)	0.428834	0.997865	3	ATP1B4	ATP1A2	KCNJ2
aorta morphogenesis (GO:0035909)	0.319645	0.997865	4	HEY1	PROX1	BMPR1A	MYLK
negative regulation of toll-like receptor signaling pathway (GO:0034122)	0.28844	0.997865	7	OTUD4	TICAM2	TNFAIP3	IRAK3	TLR6	LGR4	TLR3
DNA replication initiation (GO:0006270)	0.417142	0.997865	5	PURA	ORC6	GINS4	ORC2	TOPBP1
positive regulation of isotype switching (GO:0045830)	0.464163	0.997865	2	PAXIP1	TFRC
negative regulation of DNA repair (GO:0045738)	0.335925	0.997865	2	TWIST1	TRIP12
positive regulation of pri-miRNA transcription from RNA polymerase II promoter (GO:1902895)	0.443334	0.997865	4	TGFB2	PDGFB	TEAD1	HIF1A
glomerulus vasculature development (GO:0072012)	0.335925	0.997865	2	ANGPT1	TEK
negative regulation of protein serine/threonine kinase activity (GO:0071901)	0.248862	0.997865	14	PAQR3	SPRY4	IRAK3	IPO7	SORL1	LRP6	BMP4	RGS2	APC	PRKAR1A	PKIA	NF1	SPRY3	SPRY1
fat-soluble vitamin catabolic process (GO:0042363)	0.401685	0.997865	2	CYP26B1	CYP4F11
positive regulation of response to biotic stimulus (GO:0002833)	0.361117	0.997865	4	ANKRD17	CD180	OPTN	PUM2
regulation of myosin-light-chain-phosphatase activity (GO:0035507)	0.401685	0.997865	2	PPP1R12A	ROCK2
positive regulation of calcium-mediated signaling (GO:0050850)	0.362772	0.997865	6	CALM3	AKAP6	HAP1	PKD2	CALM1	TRDN
midbrain dopaminergic neuron differentiation (GO:1904948)	0.329794	0.997865	3	NR4A2	RYK	LRP6
intestinal lipid absorption (GO:0098856)	0.522595	0.997865	2	FABP2	CD36
negative regulation of epithelial cell apoptotic process (GO:1904036)	0.395269	0.997865	6	SEMA5A	ANGPT1	FGG	KRIT1	TNFAIP3	TEK
establishment of melanosome localization (GO:0032401)	0.40249	0.997865	4	MKKS	RAB27A	RAB27B	BBS7
establishment of protein localization to vacuole (GO:0072666)	0.308935	0.997865	5	CACNG8	TMEM50A	VPS13C	TMEM50B	VTI1B
positive regulation of protein targeting to membrane (GO:0090314)	0.34488	0.997865	5	C2CD5	ITGAM	KCNB1	ANK3	MFF
cardiac right ventricle morphogenesis (GO:0003215)	0.379751	0.997865	3	TGFB2	TBX20	BMPR1A
toll-like receptor 3 signaling pathway (GO:0034138)	0.522595	0.997865	2	RIPK1	TLR3
melanosome localization (GO:0032400)	0.483281	0.997865	4	MKKS	RAB27A	RAB27B	BBS7
establishment of protein localization to membrane (GO:0090150)	0.242832	0.997865	17	NSF	RTP4	ATG3	PRKCI	ZDHHC20	RAB3IP	CHM	ZDHHC21	ANK3	ZDHHC2	EGFR	ZDHHC14	ZDHHC15	RAB10	RABGEF1	RAB3GAP2	OPTN
glycosaminoglycan catabolic process (GO:0006027)	0.245444	0.997865	12	VCAN	TMEM2	SDC2	IDS	KERA	GPC5	GPC4	FGF2	GNS	GPC6	CD44	ARSB
regulation of kinase activity (GO:0043549)	0.265712	0.997865	20	DDR1	EPHA6	MUSK	RYK	INSR	PIFO	EGFR	CAMKK2	PRDX3	DSTYK	RBL1	ERBB3	ROR1	TEK	ROR2	MET	EPHB1	ROS1	EPHB4	EPHB3
termination of RNA polymerase I transcription (GO:0006363)	0.28844	0.997865	7	TAF1D	TAF1B	POLR1B	TWISTNB	TAF1A	POLR2F	GTF2H5
negative regulation of endothelial cell migration (GO:0010596)	0.376372	0.997865	7	MECP2	BMP10	RGCC	KRIT1	HMGB1	AGTR2	FGF2
peroxisome fission (GO:0016559)	0.522595	0.997865	2	PEX19	MFF
regulation of striated muscle cell differentiation (GO:0051153)	0.464163	0.997865	2	AKAP13	SIK1
regulation of protein complex disassembly (GO:0043244)	0.278564	0.997865	4	BNIP3	INSR	IRAK3	ETF1
microvillus assembly (GO:0030033)	0.464163	0.997865	2	RAPGEF2	TNIK
negative regulation of interleukin-8 secretion (GO:2000483)	0.401685	0.997865	2	PTPN22	TLR6
regulation of lipid catabolic process (GO:0050994)	0.361117	0.997865	4	PRKAA1	PDE3B	ANGPTL3	TYSND1
regulation of cell-cell adhesion mediated by cadherin (GO:2000047)	0.522595	0.997865	2	RGCC	PLG
response to leucine (GO:0043201)	0.522595	0.997865	2	RRAGD	UBR1
amyloid-beta metabolic process (GO:0050435)	0.476439	0.997865	3	MME	PSEN1	IDE
positive regulation of transcription initiation from RNA polymerase II promoter (GO:0060261)	0.361117	0.997865	4	PAXIP1	PSMC4	ESR1	GTF2F2
neural crest cell development (GO:0014032)	0.253114	0.997865	8	SEMA4A	SEMA3C	SEMA4C	SEMA3E	SEMA4F	SOX11	PHACTR4	CORO1C
monosaccharide transport (GO:0015749)	0.476439	0.997865	3	SLC2A9	SLC2A10	SLC2A12
regulation of T cell mediated immunity (GO:0002709)	0.464163	0.997865	2	ZBTB1	HMGB1
glutamate catabolic process (GO:0006538)	0.335925	0.997865	2	ALDH5A1	GAD1
regulation of lymphocyte proliferation (GO:0050670)	0.278564	0.997865	4	PTPN22	SOX11	AHR	FGF10
regulation of ATP biosynthetic process (GO:2001169)	0.464163	0.997865	2	PID1	PPARGC1A
retrograde transport, endosome to plasma membrane (GO:1990126)	0.476439	0.997865	3	VPS29	SNX27	ANKRD50
tyrosine metabolic process (GO:0006570)	0.401685	0.997865	2	DCT	IYD
regulation of smooth muscle cell proliferation (GO:0048660)	0.344662	0.997865	9	BMP4	EDN1	IFNG	PDGFB	MFN2	TNFAIP3	ANG	NOX1	FOXP1
carboxylic acid transmembrane transport (GO:1905039)	0.253114	0.997865	8	SLC7A6	SLC38A1	SLC36A2	SLC16A7	SLC38A9	SLC36A4	SLC38A2	SLC38A4
viral life cycle (GO:0019058)	0.272326	0.997865	21	RAB1A	NUP205	GPR15	VTA1	ITGB3	VPS4A	UBP1	NEDD4L	VPS37B	NUP93	NFIA	TPR	CHMP2B	NUP35	ITGAV	KPNA4	NUP43	RAE1	PPIA	KPNB1	NUP37
DNA replication-dependent nucleosome organization (GO:0034723)	0.279717	0.997865	3	CHAF1B	RBBP4	ASF1A
regulation of leukocyte activation (GO:0002694)	0.522595	0.997865	2	PLSCR1	MYO18A
protein deacetylation (GO:0006476)	0.317347	0.997865	7	HDAC2	SIN3B	TBL1XR1	BRMS1L	PRDM5	MSL3	SIRT5
mitochondrial protein processing (GO:0034982)	0.522595	0.997865	2	YME1L1	OMA1
lipid modification (GO:0030258)	0.298461	0.997865	6	DGKG	DGKE	CYP2C8	DGKB	EPHX2	DGKI
protein K6-linked ubiquitination (GO:0085020)	0.464163	0.997865	2	BARD1	BRCA1
positive regulation of sprouting angiogenesis (GO:1903672)	0.362772	0.997865	6	AKT3	APLNR	PTGS2	PIK3C2A	FGF2	DLL1
positive regulation of smooth muscle cell migration (GO:0014911)	0.576568	0.997865	2	DOCK5	PDGFB
sodium ion homeostasis (GO:0055078)	0.298461	0.997865	6	SLC12A1	ATP1B4	NEDD4L	ATP1A2	CYP4F12	SLC8A1
positive regulation of leukocyte cell-cell adhesion (GO:1903039)	0.308935	0.997865	5	FAM49B	HLA-DPB1	HAS2	CD47	CD44
response to interferon-alpha (GO:0035455)	0.361117	0.997865	4	PDE12	TPR	EIF2AK2	IFNAR1
tRNA-containing ribonucleoprotein complex export from nucleus (GO:0071431)	0.34672	0.997865	7	NUP93	NUP205	TPR	NUP35	NUP43	RAE1	NUP37
peptidyl-L-cysteine S-palmitoylation (GO:0018230)	0.34488	0.997865	5	ZDHHC20	ZDHHC21	ZDHHC2	ZDHHC14	ZDHHC15
regulation of natural killer cell activation (GO:0032814)	0.522595	0.997865	2	IL23A	PTPN22
positive regulation of lipid kinase activity (GO:0090218)	0.330423	0.997865	6	PDGFB	CCR7	TEK	PRKD1	F2	FGF2
superoxide metabolic process (GO:0006801)	0.395269	0.997865	6	PRDX2	CYB5R4	CYBB	NOX5	SOD2	NOX1
negative regulation of fibroblast proliferation (GO:0048147)	0.40249	0.997865	4	MYC	NF1	PEX2	TRIM32
peptidyl-S-diacylglycerol-L-cysteine biosynthetic process from peptidyl-cysteine (GO:0018231)	0.34488	0.997865	5	ZDHHC20	ZDHHC21	ZDHHC2	ZDHHC14	ZDHHC15
chromatin disassembly (GO:0031498)	0.443334	0.997865	4	SMARCE1	SMARCC1	PBRM1	SET
negative regulation of interferon-beta production (GO:0032688)	0.522595	0.997865	2	YY1	REL
negative regulation of alcohol biosynthetic process (GO:1902931)	0.522595	0.997865	2	ERLIN1	ERLIN2
heparan sulfate proteoglycan biosynthetic process, polysaccharide chain biosynthetic process (GO:0015014)	0.335925	0.997865	2	EXT2	HS2ST1
eye development (GO:0001654)	0.319295	0.997865	9	TGFB2	NIPBL	EFEMP1	COL5A2	POLR2D	PAX6	HIPK1	CHRDL1	FBN1
protein O-linked mannosylation (GO:0035269)	0.329794	0.997865	3	FKRP	ISPD	FKTN
embryonic organ development (GO:0048568)	0.296241	0.997865	11	ALDH1A3	TGFB2	HEY1	KMT2A	POLR2D	COBL	TBC1D23	TEAD1	TEAD2	GLI3	TGFBR2
cellular response to granulocyte macrophage colony-stimulating factor stimulus (GO:0097011)	0.335925	0.997865	2	ZFP36	ZFP36L2
positive regulation of autophagosome assembly (GO:2000786)	0.522595	0.997865	2	SH3GLB1	RAB3GAP2
glutamate metabolic process (GO:0006536)	0.308935	0.997865	5	GCLC	ALDH5A1	GAD1	GCLM	GLS
phosphatidylserine acyl-chain remodeling (GO:0036150)	0.308935	0.997865	5	PLA2G16	OSBPL8	PLA2G12A	PLA2G2D	PLA2G4D
negative regulation of activin receptor signaling pathway (GO:0032926)	0.522595	0.997865	2	ACVR1	DAND5
retinol metabolic process (GO:0042572)	0.379751	0.997865	3	RDH10	POLR2D	CYP1B1
positive regulation of cytokine secretion (GO:0050715)	0.25863	0.997865	15	PTGER4	IL33	FZD5	CADM1	TSLP	F2R	TWIST1	PTPN22	HMGB1	MAPK14	RGCC	DHX36	TLR8	CD58	HAVCR2
venous blood vessel development (GO:0060841)	0.401685	0.997865	2	CCBE1	PROX1
regulation of cholesterol biosynthetic process (GO:0045540)	0.387204	0.997865	8	IDI1	PRKAA1	NFYA	SP1	ERLIN1	ELOVL6	ERLIN2	KPNB1
monocarboxylic acid transport (GO:0015718)	0.296241	0.997865	11	NCOA1	NCOA2	SLC10A6	SLC10A2	SLCO1B3	SLCO1A2	SLC16A7	AKR1C4	ABCB11	SLC6A1	SLC16A14
interleukin-1 secretion (GO:0050701)	0.522595	0.997865	2	CD36	TLR6
negative regulation of mitochondrion organization (GO:0010823)	0.34672	0.997865	7	PSMD10	BAG4	BNIP3	MPV17L	IAPP	OMA1	CLU
DNA damage response, signal transduction resulting in transcription (GO:0042772)	0.476439	0.997865	3	RPS6KA6	BRCA1	TP63
positive regulation of mitotic cell cycle spindle assembly checkpoint (GO:0090267)	0.401685	0.997865	2	GEN1	TPR
nucleosome disassembly (GO:0006337)	0.443334	0.997865	4	SMARCE1	SMARCC1	PBRM1	SET
carbohydrate homeostasis (GO:0033500)	0.276271	0.997865	13	MBD5	PRKAA1	PRKAA2	KCNB1	INSR	ACSM2A	PAX6	CYB5R4	HECTD4	POLR2D	CRY1	PTPN2	MCU
positive regulation of centrosome cycle (GO:0046607)	0.335925	0.997865	2	RANBP3	CEP120
regulation of cytoplasmic transport (GO:1903649)	0.464163	0.997865	2	MAPK1	DNAJC13
regulation of ATPase activity (GO:0043462)	0.246093	0.997865	9	PXK	PLN	DNAJC10	TOR1AIP2	DNAJC9	TOR1AIP1	PFN2	LTF	FGF10
flavin-containing compound metabolic process (GO:0042726)	0.401685	0.997865	2	RFK	ENPP1
negative regulation of production of miRNAs involved in gene silencing by miRNA (GO:1903799)	0.401685	0.997865	2	BCDIN3D	ESR1
regulation of autophagosome assembly (GO:2000785)	0.34672	0.997865	7	SH3GLB1	PIKFYVE	PHF23	RAB3GAP2	SMCR8	RAB5A	RAB33B
Golgi vesicle budding (GO:0048194)	0.522595	0.997865	2	ATP8A1	MYO18A
regulation of lamellipodium assembly (GO:0010591)	0.452859	0.997865	5	FER	ARPC2	SSH2	WASF2	SSH1
positive regulation of T cell chemotaxis (GO:0010820)	0.522595	0.997865	2	ADAM17	CXCL13
cellular response to osmotic stress (GO:0071470)	0.476439	0.997865	3	PKD2	YBX3	MYLK
tRNA export from nucleus (GO:0006409)	0.34672	0.997865	7	NUP93	NUP205	TPR	NUP35	NUP43	RAE1	NUP37
positive regulation of mitotic cell cycle phase transition (GO:1901992)	0.387204	0.997865	8	ANKRD17	MECP2	LSM11	RCC2	RDX	NSMCE2	UBE2E2	PHOX2B
fatty acid elongation, unsaturated fatty acid (GO:0019368)	0.401685	0.997865	2	ELOVL2	ELOVL6
calcium ion transport into cytosol (GO:0060402)	0.443334	0.997865	4	GRIN2A	ATP2B4	GRIN2B	SLC8A1
iron ion transport (GO:0006826)	0.379751	0.997865	3	HEPH	TFRC	SLC11A2
regulation of interleukin-13 production (GO:0032656)	0.401685	0.997865	2	TSLP	TNFSF4
columnar/cuboidal epithelial cell differentiation (GO:0002065)	0.522595	0.997865	2	SOX11	ROS1
ubiquitin-dependent ERAD pathway (GO:0030433)	0.285926	0.997865	11	HSPA5	PSMC4	DNAJC10	UBQLN1	SYVN1	ERLIN1	DNAJB9	ERLIN2	UBE2G2	2019-03-06	DZIP3	HSP90B1
cellular protein complex disassembly (GO:0043624)	0.476439	0.997865	3	NSF	ETF1	GSPT1
positive regulation of DNA binding (GO:0043388)	0.376372	0.997865	7	NIPBL	TRAF6	PLAUR	HMGA2	TWIST1	HMGB1	NME1
response to forskolin (GO:1904321)	0.464163	0.997865	2	AHR	GNAI1
positive regulation of peptide hormone secretion (GO:0090277)	0.35967	0.997865	8	AIMP1	NLGN2	SLC30A8	FGG	POLR2D	TRH	TM7SF3	MCU
sensory perception of sound (GO:0007605)	0.302686	0.997865	16	TFAP2A	CLIC5	MKKS	EYA1	HOMER2	COL11A1	HPN	ATP2B2	NIPBL	MYO3B	COL4A3	BIRC5	ROR1	NDP	ALDH7A1	CCDC50
mitotic DNA replication checkpoint (GO:0033314)	0.522595	0.997865	2	TOPBP1	ZNF830
interferon-gamma-mediated signaling pathway (GO:0060333)	0.30515	0.997865	14	VCAM1	HLA-A	IFNG	IRF4	TRIM5	HLA-DPB1	IRF8	IRF6	TRIM38	B2M	CAMK2G	CD44	TRIM22	HLA-DQB1
regulation of natural killer cell proliferation (GO:0032817)	0.335925	0.997865	2	IL23A	PTPN22
regulation of postsynaptic membrane potential (GO:0060078)	0.34672	0.997865	7	GABRA2	GABRA1	GRID2	GRIN2A	GABRA4	GABRA3	GRIN2B
potassium ion import (GO:0010107)	0.332347	0.997865	8	KCNJ10	SLC12A1	KCNJ15	ATP1B4	ATP1A2	ABCC9	KCNJ2	KCNJ3
epiboly involved in wound healing (GO:0090505)	0.476439	0.997865	3	DDR1	CD44	CYR61
regulation of sequestering of calcium ion (GO:0051282)	0.522595	0.997865	2	UBASH3B	TRDN
positive regulation of excitatory postsynaptic potential (GO:2000463)	0.443334	0.997865	4	NLGN1	NLGN2	NRXN1	SHANK2
negative regulation of protein oligomerization (GO:0032460)	0.379751	0.997865	3	IAPP	SORL1	CLU
glycine transport (GO:0015816)	0.522595	0.997865	2	SLC6A5	SLC36A2
monocarboxylic acid biosynthetic process (GO:0072330)	0.267194	0.997865	14	OSBPL3	ACSM2A	AKR1C4	ABCB11	CYP8B1	ACSM2B	CYP39A1	ALDH1A3	VCAN	AMACR	DSEL	NDUFAB1	DSE	CBR4
negative regulation of protein complex disassembly (GO:0043242)	0.464163	0.997865	2	PHF23	IRAK3
7-methylguanosine mRNA capping (GO:0006370)	0.317347	0.997865	7	NCBP2	RNMT	POLR2D	POLR2F	GTF2F2	GTF2H5	CMTR2
regulation of wound healing (GO:0061041)	0.376372	0.997865	7	ARFGEF1	CD109	F2R	TNFAIP3	F2	FGF2	MYLK
ceramide catabolic process (GO:0046514)	0.576568	0.997865	2	ASAH2B	ASAH2
astrocyte differentiation (GO:0048708)	0.335925	0.997865	2	CDK6	DLL1
positive regulation of hemostasis (GO:1900048)	0.522595	0.997865	2	F2R	F2
negative regulation of cytokine-mediated signaling pathway (GO:0001960)	0.387204	0.997865	8	OTUD4	CNOT7	IRAK3	SLIT3	RFFL	ZNF675	PTPN2	ROBO1
respiratory chain complex III assembly (GO:0017062)	0.522595	0.997865	2	UQCC2	UQCC1
striated muscle cell differentiation (GO:0051146)	0.443334	0.997865	4	AKAP13	MYEF2	SIK1	PROX1
regulation of phosphoprotein phosphatase activity (GO:0043666)	0.253114	0.997865	8	PPP1R12A	PPP6R3	TSC1	CALM3	AKAP6	AGTR2	CALM1	HSP90B1
regulation of glutamate receptor signaling pathway (GO:1900449)	0.317347	0.997865	7	CRHBP	APP	NLGN1	CACNG8	NLGN2	SHISA9	SHANK2
regulation of megakaryocyte differentiation (GO:0045652)	0.331011	0.997865	10	PRMT6	TNRC6C	KAT2B	KMT2A	AGO3	AGO1	ASH2L	TNRC6A	TNRC6B	RUNX1
negative regulation of phosphatidylinositol 3-kinase signaling (GO:0014067)	0.522595	0.997865	2	TWIST1	STAMBP
regulation of cell cycle arrest (GO:0071156)	0.30732	0.997865	10	MYOG	HMGN5	RGCC	FAP	HMGA2	BRCA1	PKD2	PHOX2B	RRP8	FGF10
negative regulation by host of viral process (GO:0044793)	0.576568	0.997865	2	CRP	LTF
ERBB signaling pathway (GO:0038127)	0.28493	0.997865	16	SHC3	GAB1	PIK3C2A	CBL	EGFR	NRAS	ADAM17	RPS6KA5	EFEMP1	ERBB3	MAPK1	CPNE3	KRAS	SOS1	PAG1	FAM83B
regulation of production of miRNAs involved in gene silencing by miRNA (GO:1903798)	0.428834	0.997865	3	BMP4	ESR1	EGFR
protein import into nucleus (GO:0006606)	0.296606	0.997865	20	IPO11	RANBP3	GPN2	RANBP6	GDF5	IPO7	NUP93	NPAP1	MCM3AP	IFNG	TRPS1	TPR	NUP35	KPNA4	NUP62CL	TNPO1	RAE1	TNPO3	KPNB1	RBM22
monovalent inorganic cation transport (GO:0015672)	0.312472	0.997865	20	KCNK5	KCNJ10	SLC36A2	KCNJ15	NEDD4L	ATP1A2	ABCC9	SLC5A1	SLC4A4	SLC9B2	KCNMB1	KCNMB2	SCN7A	FGF13	SCN2A	SCN3A	SLC17A2	KCNJ2	KCNJ3	SCN1A
spliceosomal snRNP assembly (GO:0000387)	0.305381	0.997865	8	SART3	SNRPD1	SNRPE	SNRPD3	SRSF10	WDR77	RBM22	SRSF12
protein autophosphorylation (GO:0046777)	0.217969	0.997865	34	DDR1	SMG1	SLA	EGFR	CAMKK2	STK10	RIPK1	MAP3K9	EPHB1	EPHB4	EPHB3	YES1	MUSK	INSR	TNK1	EIF2AK2	UHMK1	MEX3B	FER	TAOK3	STK24	PEAK1	TAOK1	CAMK4	WNK3	AAK1	ULK2	ULK1	SIK1	ALPK3	TNIK	TEK	PRKD1	FRK
negative regulation of cellular amide metabolic process (GO:0034249)	0.29473	0.997865	15	SAMD4A	ORMDL1	EIF2AK2	TSC1	MALSU1	SORL1	CLU	SYNCRIP	MEX3B	CNOT7	ORMDL2	IGF2BP1	HAP1	IGF2BP2	CPEB3
positive regulation of natural killer cell mediated immune response to tumor cell (GO:0002857)	0.522595	0.997865	2	CD226	PVR
peptidyl-arginine methylation (GO:0018216)	0.522595	0.997865	2	PRMT6	PRMT2
dephosphorylation (GO:0016311)	0.275842	0.997865	24	PHLPP2	DUSP2	PTPRN2	PHLPP1	PPP1R12A	DUSP3	EPHX2	DUSP28	PTPN22	DUSP18	PTPN13	SSH2	PPM1D	PTPN14	SSH1	MTMR7	PPP1CB	PPP1CC	PPM1A	PTPRZ1	PPP4R2	CTDSP2	BTRC	PTPN5
oligodendrocyte differentiation (GO:0048709)	0.476439	0.997865	3	PRDM8	PTPRZ1	ZNF488
regulation of organelle organization (GO:0033043)	0.278526	0.997865	22	SCARB2	TBC1D8B	RABGAP1L	USP6	SURF4	RDX	NEXN	TBC1D9	TBC1D2B	MFF	RAB33B	TBCK	TBC1D1	LMAN1	RHOT1	TMEM33	TBC1D5	TAOK1	TBC1D30	CAPN2	MAPK1	ARHGEF5
sympathetic ganglion development (GO:0061549)	0.522595	0.997865	2	FZD3	PHOX2B
positive regulation of mitochondrial calcium ion concentration (GO:0051561)	0.464163	0.997865	2	RAP1GDS1	MCU
oxygen transport (GO:0015671)	0.401685	0.997865	2	MYC	IPCEF1
epithelial cell differentiation involved in kidney development (GO:0035850)	0.401685	0.997865	2	BMP4	MTSS1
arachidonic acid metabolic process (GO:0019369)	0.253186	0.997865	11	CYP2C8	DAGLA	CYP2U1	EPHX2	ALOX15	CYP1B1	PTGS2	CYP2C19	CYP4F12	MGLL	PTGS1
negative regulation of ATPase activity (GO:0032780)	0.379751	0.997865	3	PXK	PLN	LTF
positive regulation of DNA-templated transcription, initiation (GO:2000144)	0.319645	0.997865	4	BCLAF1	PAXIP1	TWIST1	GTF2F2
negative regulation of fibrinolysis (GO:0051918)	0.522595	0.997865	2	PLG	F2
regulation of defense response (GO:0031347)	0.29473	0.997865	15	ELMOD2	OTUD7B	XIAP	TNFAIP3	PTPN22	NR1D2	PTGS2	TIRAP	FOXP1	TNFSF4	BCL6B	MGLL	BIRC2	MYD88	BIRC3
adenylate cyclase-activating dopamine receptor signaling pathway (GO:0007191)	0.401685	0.997865	2	GNG2	GNAS
cellular response to organic substance (GO:0071310)	0.247073	0.997865	26	PID1	PDGFB	CXCR4	AKAP6	MAPK9	TBK1	DPYSL3	MAPK1	CYP1B1	CPNE3	SLIT3	CCR7	JUNB	NCOA1	NCOA2	MME	AVPR1A	PTPN13	MAPK14	PTPN14	MAPK13	MAPK10	IL1RAPL1	SIK1	PTPN5	PTPN2
regulation of glucose import (GO:0046324)	0.28844	0.997865	7	PRKCI	INSR	ITLN1	GRB10	ENPP1	ARPP19	APPL1
negative regulation of telomere maintenance via telomerase (GO:0032211)	0.483281	0.997865	4	GNL3L	PAPD5	HNRNPA1	DCP2
regulation of cAMP metabolic process (GO:0030814)	0.428834	0.997865	3	CXCL10	IAPP	PKD2
inner ear morphogenesis (GO:0042472)	0.34488	0.997865	5	TFAP2A	MYO3B	HPN	ZIC1	SIX1
presynaptic membrane organization (GO:0097090)	0.329794	0.997865	3	NLGN1	NLGN2	IL1RAPL1
regulation of cell cycle (GO:0051726)	0.226403	0.997865	41	ANKRD17	TTC28	LRP6	CCNB2	STK10	RBBP4	FIGNL1	CHEK1	TP53BP2	NEK1	JUNB	PHACTR4	MAP2K6	LIN52	MAP3K2	TGFB2	MAP3K1	NEK7	HMGA2	TSC1	PROX1	INHBA	THAP1	BMP4	NR4A1	CENPF	WEE1	RBL1	CDK6	THAP5	TAOK3	STK24	CCPG1	TAOK1	BIRC5	SIK1	TNIK	TARDBP	TRIM32	PRR11	BIRC2
negative regulation of glial cell apoptotic process (GO:0034351)	0.401685	0.997865	2	PRKCI	DLL1
positive regulation of NF-kappaB import into nucleus (GO:0042346)	0.522102	0.997865	3	APP	IL23A	TLR3
regulation of transforming growth factor beta receptor signaling pathway (GO:0017015)	0.267529	0.997865	16	SMAD2	SOX11	LDLRAD4	ASPN	DKK3	TGFBR2	PBLD	PPM1A	EID2	ADAM17	BAMBI	SNX25	CD109	DAND5	RNF111	SNX6
negative regulation of insulin receptor signaling pathway (GO:0046627)	0.452859	0.997865	5	PID1	GRB10	ENPP1	TSC1	PTPN2
positive regulation of cytosolic calcium ion concentration involved in phospholipase C-activating G-protein coupled signaling pathway (GO:0051482)	0.362772	0.997865	6	OR5T1	GPR65	F2R	LPAR1	HTR2C	GRM1
regulation of endothelial cell chemotaxis to fibroblast growth factor (GO:2000544)	0.401685	0.997865	2	CXCL13	FGF2
phosphatidic acid biosynthetic process (GO:0006654)	0.387204	0.997865	8	PLA2G12A	PLA2G2D	PLA2G4D	ACP6	LPCAT1	DDHD1	PLD1	AGPAT4
regulation of innate immune response (GO:0045088)	0.285975	0.997865	14	XIAP	TNFAIP3	PTPN22	IRAK3	TIRAP	PLSCR1	POLR3D	POLR3F	TLR8	POLR3G	CD36	BIRC2	IFNAR1	BIRC3
regulation of chemotaxis (GO:0050920)	0.417142	0.997865	5	PDGFB	CXCR4	ZSWIM6	PPM1F	PTPN2
positive regulation of glycogen metabolic process (GO:0070875)	0.476439	0.997865	3	EPM2AIP1	INSR	PHKG2
neutrophil extravasation (GO:0072672)	0.335925	0.997865	2	PIK3CG	CD177
pentose metabolic process (GO:0019321)	0.401685	0.997865	2	RPIA	RPE
signal transduction involved in DNA damage checkpoint (GO:0072422)	0.428834	0.997865	3	CHEK1	CDC5L	BRCA1
positive regulation of protein dephosphorylation (GO:0035307)	0.28844	0.997865	7	ANKLE2	DLC1	CNEP1R1	CALM3	AKAP6	AGTR2	CALM1
positive regulation of G2/M transition of mitotic cell cycle (GO:0010971)	0.565486	0.997865	3	MECP2	RCC2	PHOX2B
regulation of vascular smooth muscle cell proliferation (GO:1904705)	0.267135	0.997865	6	FGF9	PDGFB	MFN2	FGF2	PRKG1	BMPR1A
protein-cofactor linkage (GO:0018065)	0.576568	0.997865	2	GAD1	NDUFAB1
cell chemotaxis (GO:0060326)	0.328204	0.997865	12	SEMA5A	NR4A1	NOV	CCL20	C5AR1	LPAR1	PDGFB	PARVA	FPR3	PIK3CB	FPR2	EPHB1
morphogenesis of an epithelium (GO:0002009)	0.443334	0.997865	4	LIN7C	VCL	LRP6	ARHGAP12
positive regulation of histone H3-K4 methylation (GO:0051571)	0.428834	0.997865	3	PAXIP1	KMT2A	BRCA1
regulation of autophagy (GO:0010506)	0.218839	0.997865	39	USP13	PRKAA1	PRKAA2	WDR41	CISD2	MTMR9	PTPN22	HMGB1	PIK3CB	FOXO1	MTDH	ZKSCAN3	WDR6	SLC38A9	ZKSCAN4	RNF152	ATP6V1C1	TRIM22	ATP6V1C2	SNX6	SH3GLB1	FZD5	EXOC8	BNIP3	WDR75	RAB39B	WBP11	EEF1A1	DAP	IFNG	RRAGD	BCL2	TAB3	ULK2	ULK1	SMCR8	PRKD1	MET	OPTN
receptor internalization (GO:0031623)	0.355031	0.997865	10	DNM3	ITGB1	CACNG8	CALCRL	TFRC	GRK4	CD9	ACKR3	CD36	RAB5A
negative regulation of histone methylation (GO:0031061)	0.522595	0.997865	2	MTF2	BRCA1
embryonic digestive tract morphogenesis (GO:0048557)	0.522595	0.997865	2	NIPBL	SOX11
myelin assembly (GO:0032288)	0.522595	0.997865	2	CD9	DICER1
regulation of AMPA receptor activity (GO:2000311)	0.417142	0.997865	5	NLGN1	CACNG8	NLGN2	SHISA9	SHANK2
regulation of cell development (GO:0060284)	0.483281	0.997865	4	NOTCH2	YAP1	AKAP13	DLL1
regulation of macrophage differentiation (GO:0045649)	0.428834	0.997865	3	RIPK1	INHBA	PTPN2
regulation of extracellular matrix organization (GO:1903053)	0.401685	0.997865	2	DDR1	FAP
positive regulation of glucose transport (GO:0010828)	0.452859	0.997865	5	PRKCI	C2CD5	INSR	ITLN1	ARPP19
skeletal system development (GO:0001501)	0.270123	0.997865	28	PTGER4	HHIP	COL19A1	AKAP13	RPS6KA3	ANKH	FRZB	TRPS1	POLR2D	ALX4	COL10A1	ITGB8	PITX1	CMKLR1	KLF10	GDF11	TGFB2	SOX11	PAX1	SULF2	RAB33B	BMP5	VCAN	EVC	CDH11	GNAS	CD44	FBN1
long-chain fatty-acyl-CoA biosynthetic process (GO:0035338)	0.40249	0.997865	4	ELOVL2	ACSL5	ELOVL6	HSD17B12
Wnt signaling pathway (GO:0016055)	0.302633	0.997865	21	VPS29	CSNK1G3	FZD3	WNT2B	FZD5	RYK	PSEN1	WNT16	LRP6	NR4A2	PPM1A	SFRP2	APC	TNKS2	FRZB	MYC	CPE	STRN	NDP	BTRC	CSNK1G1
respiratory tube development (GO:0030323)	0.452859	0.997865	5	BMP4	POLR2D	NPHP3	HECA	PROX1
cellular response to vascular endothelial growth factor stimulus (GO:0035924)	0.452859	0.997865	5	NR4A1	NUS1	GAB1	PRKD1	MAPK14
forebrain neuron differentiation (GO:0021879)	0.401685	0.997865	2	RAPGEF2	INHBA
positive regulation of protein kinase B signaling (GO:0051897)	0.241416	0.997865	25	SEMA5A	ITGB1	PDGFB	PIK3CB	FGF2	EGFR	PIK3CG	MTDH	ERBB3	FGF9	FAM110C	GCNT2	CCR7	OSBPL8	ANGPT1	INSR	GAB1	AKR1C2	FRS2	ESR1	CNTN1	IAPP	TEK	MET	FGF10
purine nucleotide biosynthetic process (GO:0006164)	0.401685	0.997865	2	ADSL	HPRT1
intrinsic apoptotic signaling pathway in response to endoplasmic reticulum stress (GO:0070059)	0.417142	0.997865	5	AIFM1	TMEM117	DNAJC10	BCL2	MAP3K5
regulation of vasoconstriction (GO:0019229)	0.395269	0.997865	6	CHRM3	KCNMB2	FGG	F2R	BDKRB2	AVPR1A
negative regulation of transcription from RNA polymerase II promoter in response to stress (GO:0097201)	0.576568	0.997865	2	IMPACT	HIF1AN
positive regulation of establishment of protein localization to mitochondrion (GO:1903749)	0.318171	0.997865	21	SH3GLB1	CDKL2	LEPROT	MYBPC1	FZD5	NKAP	WDR75	HNMT	WBP11	DYNLL2	YWHAZ	DTWD2	PPP3R1	BCL2L11	TFDP1	TFDP2	BCL2	TP53BP2	KCNN3	YWHAG	TP63
positive regulation of leukocyte activation (GO:0002696)	0.319645	0.997865	4	IL33	TSLP	CD226	TLR6
global genome nucleotide-excision repair (GO:0070911)	0.317347	0.997865	7	CUL4A	SUMO3	USP45	UBE2N	UBE2V2	RNF111	GTF2H5
cellular response to cold (GO:0070417)	0.335925	0.997865	2	DNAJC3	FOXO1
protein import (GO:0017038)	0.363935	0.997865	11	NUP93	NPAP1	MCM3AP	IPO11	RANBP3	NUP62CL	RAE1	IPO7	CLU	TNPO3	KPNB1
cellular response to steroid hormone stimulus (GO:0071383)	0.27356	0.997865	5	BMP4	ABHD2	ATP1A2	NR3C1	TFPI
tRNA aminoacylation (GO:0043039)	0.387204	0.997865	8	AIMP1	DARS	TARSL2	GATC	DARS2	QRSL1	FARSB	WARS2
dorsal aorta development (GO:0035907)	0.401685	0.997865	2	HEY1	BMPR1A
L-fucose metabolic process (GO:0042354)	0.522595	0.997865	2	FUT6	FUT9
regulation of transcription initiation from RNA polymerase II promoter (GO:0060260)	0.428834	0.997865	3	ATF7IP	PAXIP1	GTF2F2
regulation of mitochondrial fission (GO:0090140)	0.443334	0.997865	3	BNIP3	DDHD1	MFF	2019-03-05
negative regulation of mononuclear cell migration (GO:0071676)	0.335925	0.997865	2	NOV	BMP5
regulation of axonogenesis (GO:0050770)	0.341068	0.997865	11	SIPA1L1	SLITRK1	CHN1	NRCAM	ZSWIM6	LRRC4C	SSH2	SSH1	PLXNA3	ROBO1	EPHB3
negative regulation of mitotic cell cycle (GO:0045930)	0.30732	0.997865	10	BMP4	FZD3	BTG1	RGCC	FAP	CHEK1	TRIM35	HECA	ZFP36L2	MCPH1
insulin secretion involved in cellular response to glucose stimulus (GO:0035773)	0.335925	0.997865	2	PTPRN2	RAB11FIP2
molybdopterin cofactor biosynthetic process (GO:0032324)	0.401685	0.997865	2	NFS1	MBIP
nucleobase-containing small molecule interconversion (GO:0015949)	0.459821	0.997865	6	RRM2B	GSR	CMPK1	GLRX	AK4	NME1
modulation of excitatory postsynaptic potential (GO:0098815)	0.452859	0.997865	5	APP	NLGN1	NLGN2	NRXN1	SHANK2
dermatan sulfate metabolic process (GO:0030205)	0.428834	0.997865	3	VCAN	DSEL	DSE
activation of JUN kinase activity (GO:0007257)	0.427687	0.997865	6	MAP3K2	MDFIC	TAOK1	RIPK1	MAP3K9	MAP3K5
chromosome condensation (GO:0030261)	0.381054	0.997865	5	TOP2A	NIPBL	AIFM1	PAPD7	PHF23
establishment of viral latency (GO:0019043)	0.522595	0.997865	2	LIG4	PPIA
regulation of apoptotic signaling pathway (GO:2001233)	0.452859	0.997865	5	NR4A2	DEPTOR	BCL2	FAS	TRAF1
progesterone receptor signaling pathway (GO:0050847)	0.401685	0.997865	2	YAP1	UBE3A
neutrophil activation involved in immune response (GO:0002283)	0.234241	0.997865	88	ITGAM	ATP8A1	GDI2	LPCAT1	SLC2A3	HMGB1	CTSS	HEBP2	STK10	RAB44	GLIPR1	GM2A	TIMP2	PSMD1	OLR1	ITGAV	CPNE3	CD36	B2M	CD33	CD177	KCMF1	TICAM2	MME	CD93	NHLRC3	APAF1	TUBB	NFAM1	PLAUR	CYBB	ATP11B	ANO6	SCAMP1	EEF1A1	DNAJC3	CLEC4C	RAP2B	RAB37	DSG1	CD47	PPIA	CD44	PAFAH1B2	KPNB1	VCL
regulation of sprouting angiogenesis (GO:1903670)	0.443334	0.997865	4	TMEM2	SEMA6A	FGF2	DLL1
receptor clustering (GO:0043113)	0.417142	0.997865	5	NLGN1	DLG2	MUSK	NRXN1	MADCAM1
positive regulation of steroid biosynthetic process (GO:0010893)	0.464163	0.997865	2	PRKAA1	IFNG
tRNA transport (GO:0051031)	0.406124	0.997865	7	NUP93	NUP205	TPR	NUP35	NUP43	RAE1	NUP37
regulation of phospholipase activity (GO:0010517)	0.576568	0.997865	2	RGS2	ANGPTL3
protein localization to lysosome (GO:0061462)	0.427687	0.997865	6	SCARB2	CACNG8	RNF128	VPS4A	SORL1	C12ORF66
peptidyl-serine modification (GO:0018209)	0.223968	0.997865	33	SMG1	ROCK2	PDGFB	TTBK2	CAMKK2	MYLK4	RPS6KA3	MAPK9	TBK1	AKT3	PHKG2	STK38L	PDK3	MAPK1	CAMK2G	GALNT7	CSNK1G3	PRKCI	CAMK1D	GALNT1	MAPK14	HIPK3	DCLK1	UHMK1	TGFBR2	MAPK13	CAMK4	ULK1	SGK3	PRKD1	SGK2	TDGF1	CSNK1G1
cardiac left ventricle morphogenesis (GO:0003214)	0.476439	0.997865	3	SFRP2	CPE	TGFBR2
positive regulation of isomerase activity (GO:0010912)	0.401685	0.997865	2	PLSCR1	ITGAM
positive regulation of vascular endothelial growth factor receptor signaling pathway (GO:0030949)	0.379751	0.997865	3	ITGB3	GRB10	HIF1A
regulation of epidermal growth factor-activated receptor activity (GO:0007176)	0.417142	0.997865	5	APP	ADAM17	CBL	SOCS4	SNX6
negative regulation of hemopoiesis (GO:1903707)	0.476439	0.997865	3	HOXA9	MEIS1	CDK6
endosomal vesicle fusion (GO:0034058)	0.576568	0.997865	2	SAMD9L	VPS4A
regulation of adherens junction organization (GO:1903391)	0.40249	0.997865	4	ROCK2	RDX	GPM6B	CORO1C
I-kappaB phosphorylation (GO:0007252)	0.576568	0.997865	2	MAP3K7	TLR3
negative regulation of calcium ion transport (GO:0051926)	0.443334	0.997865	4	PLN	ATP1A2	TRIM27	EPPIN
photoperiodism (GO:0009648)	0.308935	0.997865	5	PPP1CB	PPP1CC	PER3	CRY1	SIK1
nucleotide-excision repair, DNA gap filling (GO:0006297)	0.381054	0.997865	5	RFC1	PAPD7	RPA1	LIG4	LIG3
positive regulation of cytokine-mediated signaling pathway (GO:0001961)	0.34672	0.997865	7	ADAM17	EDN1	TICAM2	TSLP	UBE2K	HIF1A	TRIM44
fatty acid elongation, monounsaturated fatty acid (GO:0034625)	0.401685	0.997865	2	ELOVL2	ELOVL6
negative regulation of chemotaxis (GO:0050922)	0.625923	0.997865	2	PTPN2	ROBO1
IRES-dependent viral translational initiation (GO:0075522)	0.576568	0.997865	2	DENR	EIF3F
positive regulation of purine nucleotide biosynthetic process (GO:1900373)	0.417142	0.997865	5	PID1	CALM3	CALM1	PPARGC1A	TSHR
substrate-dependent cell migration, cell extension (GO:0006930)	0.401685	0.997865	2	OPHN1	CD2AP
neuron projection extension (GO:1990138)	0.362772	0.997865	6	IMPACT	FLRT3	ULK2	ULK1	LLPH	SH3GL2
cellular modified amino acid catabolic process (GO:0042219)	0.379751	0.997865	3	SARDH	GGACT	PCYOX1
positive regulation of myeloid cell differentiation (GO:0045639)	0.395269	0.997865	6	INHBA	FOXO3	MAPK14	HIF1A	ACVR2A	HOXA5
protein acetylation (GO:0006473)	0.34672	0.997865	7	NAA50	ING5	KAT2B	ESCO1	KAT6A	ESCO2	FOXO1
negative regulation of protein homooligomerization (GO:0032463)	0.464163	0.997865	2	IAPP	CLU
negative regulation of cell migration (GO:0030336)	0.235461	0.997865	24	RNF20	BMP10	MCTP1	LDLRAD4	FGF2	CORO1C	PBLD	PTPRG	ROBO1	ACVR1C	SFRP2	STK24	DLC1	DPYSL3	NF1	CYP1B1	SRGAP3	SRGAP2	PHLDB2	SCAI	VCL	PFN2	CLASP2	BMPR1A
phosphatidylglycerol acyl-chain remodeling (GO:0036148)	0.40249	0.997865	4	PLA2G12A	PLA2G2D	PLA2G4D	LPCAT1
regulation of exit from mitosis (GO:0007096)	0.522102	0.997865	3	ANLN	RGCC	KNTC1
regulation of brown fat cell differentiation (GO:0090335)	0.464163	0.997865	2	FTO	PTGS2
cellular zinc ion homeostasis (GO:0006882)	0.459821	0.997865	6	SLC30A9	SLC30A8	MT1A	SLC30A5	SLC39A6	SLC39A14
liver development (GO:0001889)	0.28844	0.997865	7	NF1	NPHP3	ARID5B	COBL	PROX1	PKD2	MET
response to estradiol (GO:0032355)	0.26019	0.997865	7	MYOG	CRHBP	NRIP1	CSN1S1	SSTR2	ESR1	EGFR
spindle assembly (GO:0051225)	0.28493	0.997865	16	NEK7	HAUS3	XIAP	GOLGA8J	KIF11	GOLGA8N	HAUS2	GOLGA6D	ZNF207	BIRC5	TUBGCP4	BIRC2	KPNB1	NAIP	GOLGA8A	BIRC3
eye photoreceptor cell differentiation (GO:0001754)	0.379751	0.997865	3	AGTPBP1	RORB	SDK2
heparan sulfate proteoglycan metabolic process (GO:0030201)	0.483281	0.997865	4	EXT2	HS6ST2	SULF2	HS2ST1
positive regulation of Rho protein signal transduction (GO:0035025)	0.452859	0.997865	5	AKAP13	GPR65	F2R	LPAR1	ROBO1
cellular response to forskolin (GO:1904322)	0.464163	0.997865	2	AHR	GNAI1
regulation of extracellular matrix disassembly (GO:0010715)	0.476439	0.997865	3	DDR1	FAP	CLASP2
noradrenergic neuron differentiation (GO:0003357)	0.401685	0.997865	2	SOX11	PHOX2B
epithelial cilium movement involved in determination of left/right asymmetry (GO:0060287)	0.522595	0.997865	2	NPHP3	LRRC6
macromolecule modification (GO:0043412)	0.417142	0.997865	5	ST6GAL1	ST3GAL6	PRDM10	CHD1	LRPPRC
L-ascorbic acid metabolic process (GO:0019852)	0.522595	0.997865	2	GSTO2	SLC2A3
mitochondrial respiratory chain complex III assembly (GO:0034551)	0.522595	0.997865	2	UQCC2	UQCC1
negative regulation of natural killer cell mediated cytotoxicity (GO:0045953)	0.522595	0.997865	2	CLEC12B	SERPINB9
negative regulation of G-protein coupled receptor protein signaling pathway (GO:0045744)	0.522024	0.997865	4	RGS2	CRY1	MET	BICD1
error-free translesion synthesis (GO:0070987)	0.443334	0.997865	4	RFC1	RPA1	SPRTN	RCHY1
positive regulation of programmed cell death (GO:0043068)	0.249778	0.997865	48	ITGB1	TOP2A	PXT1	TNFAIP8	DCUN1D3	HMGB1	PSEN1	FOXO3	FOXO1	IFIT2	ING5	AKAP13	MAPK9	BCLAF1	BCL2L11	AIFM1	PNMA1	FRZB	UBD	CYP1B1	RIPK1	HOXA5	MAP3K5	BARD1	UNC13B	STPG1	KLF11	MOAP1	BNIP3L	ARHGEF12	PRMT2	APAF1	BNIP3	HMGA2	PAWR	ANO6	BMP4	SFRP2	APC	TRAF6	NF1	TRIM35	FAS	ITGA6	IAPP	SOS1
mesenchyme development (GO:0060485)	0.319645	0.997865	4	BMP4	SFRP2	HMGA2	PKD2
negative regulation of epidermal growth factor receptor signaling pathway (GO:0042059)	0.387204	0.997865	8	SPRY1	STAM	CBL	SH3GL2	EGFR	SOCS4	PTPN2	SNX6
positive regulation of gene silencing by miRNA (GO:2000637)	0.483281	0.997865	4	BMP4	ZFP36	EGFR	PUM2
protein palmitoylation (GO:0018345)	0.427687	0.997865	6	ZDHHC20	ZDHHC5	ZDHHC21	ZDHHC2	ZDHHC14	ZDHHC15
long-chain fatty acid metabolic process (GO:0001676)	0.341068	0.997865	11	ASAH2B	DAGLA	ASAH2	ACOX1	ELOVL2	ALOX15	CYP1B1	ELOVL6	AIG1	CYP4F12	MGLL
second-messenger-mediated signaling (GO:0019932)	0.256914	0.997865	13	EDN1	MCTP1	CXCR4	KSR2	FPR2	CAMKK2	NUDT4	INPP5A	NMUR2	CD36	AGTR2	MCTP2	MCU
regulation of cardiac muscle cell contraction (GO:0086004)	0.487949	0.997865	5	HCN4	PLN	ATP2A2	CTNNA3	FGF13
regulation of natural killer cell mediated cytotoxicity directed against tumor cell target (GO:0002858)	0.576568	0.997865	2	CD226	PVR
nuclear migration (GO:0007097)	0.522595	0.997865	2	DCTN4	PAFAH1B1
positive regulation of CREB transcription factor activity (GO:0032793)	0.522102	0.997865	3	RPS6KA5	CAMK1D	PRKD1
motor neuron axon guidance (GO:0008045)	0.576568	0.997865	2	CHN1	PLXNA3
positive regulation of mononuclear cell migration (GO:0071677)	0.443334	0.997865	4	CXCL10	ANO6	HMGB1	FPR2
intrinsic apoptotic signaling pathway (GO:0097193)	0.265712	0.997865	20	MOAP1	APAF1	BNIP3	GSKIP	BRCA1	RRP8	PPM1F	CUL4A	BCL2L11	AIFM1	STK24	TMEM117	DNAJC10	BCL2	TP53BP2	CYP1B1	ZNF385D	FNIP2	MAP3K5	PDK1
negative regulation of supramolecular fiber organization (GO:1902904)	0.318475	0.997865	11	ARFGEF1	KANK2	LIMA1	PLEKHH2	APC	IAPP	FGF13	CLU	TTBK2	PFN2	CLASP2
regulation of dendrite morphogenesis (GO:0048814)	0.344662	0.997865	9	SIPA1L1	SS18L1	SDC2	IL1RAPL1	HECW1	RAPGEF2	NEDD4L	TNIK	PDLIM5
regulation of clathrin-dependent endocytosis (GO:2000369)	0.522102	0.997865	3	BMP2K	AAK1	PIK3CB
positive regulation of interleukin-4 production (GO:0032753)	0.522102	0.997865	3	IRF4	TNFSF4	HAVCR2
regulation of cell-substrate junction assembly (GO:0090109)	0.522102	0.997865	3	ROCK2	GPM6B	CORO1C
establishment or maintenance of actin cytoskeleton polarity (GO:0030950)	0.476439	0.997865	3	MAPKAP1	RND2	RND3
histone H3-K4 methylation (GO:0051568)	0.381054	0.997865	5	PAXIP1	KMT2A	TET3	TET2	ASH2L
response to dopamine (GO:1903350)	0.522595	0.997865	2	MAPK1	GABPA
regulation of intracellular steroid hormone receptor signaling pathway (GO:0033143)	0.330423	0.997865	6	UFL1	PRMT2	UBA5	ESR1	KCTD6	RUNX1
positive regulation of membrane potential (GO:0045838)	0.464163	0.997865	2	GLRX	ANK3
mitotic cell cycle arrest (GO:0071850)	0.476439	0.997865	3	RGCC	FAP	MCPH1
negative regulation of organelle assembly (GO:1902116)	0.330423	0.997865	6	KAT2B	PHF23	TBC1D30	TRIM37	SMCR8	BRCA1
myelin maintenance (GO:0043217)	0.464163	0.997865	2	CXCR4	CLU
protein localization to mitochondrion (GO:0070585)	0.576568	0.997865	1	COX18	2019-03-05
lysosome organization (GO:0007040)	0.459821	0.997865	6	AKTIP	ZKSCAN3	TMEM106B	ZKSCAN4	ARSB	TMEM165
Rap protein signal transduction (GO:0032486)	0.576568	0.997865	2	RAP2B	RAPGEF2
cytoskeleton-dependent cytokinesis (GO:0061640)	0.30515	0.997865	14	USP8	VPS4A	RTKN2	ANK3	CECR2	ANLN	SNX18	ALKBH4	APC	SPIRE1	MITD1	NOX5	STAMBP	MYH10
microtubule anchoring (GO:0034453)	0.379751	0.997865	3	BICD1	BICD2	CLASP2
artery development (GO:0060840)	0.565486	0.997865	3	ANGPTL3	NF1	PKD2
intestinal absorption (GO:0050892)	0.428834	0.997865	3	FABP2	CD36	SLC5A1
positive regulation of leukocyte migration (GO:0002687)	0.376372	0.997865	7	CXCL10	CXCL6	ADAM17	MADCAM1	PPBP	CXCL13	CXCL5
cellular response to ATP (GO:0071318)	0.576568	0.997865	2	SSH1	HSP90B1
axon development (GO:0061564)	0.333778	0.997865	18	SEMA5A	LINGO2	APP	ECM2	RYK	DCC	KERA	MTR	ANK3	RAB10	SLITRK1	SLITRK3	SLITRK6	SLIT3	NRCAM	CNTN4	LLGL1	EPHB3
response to cholesterol (GO:0070723)	0.522102	0.997865	3	SMAD2	LRP6	TGFBR2
nuclear-transcribed mRNA catabolic process, deadenylation-dependent decay (GO:0000288)	0.276271	0.997865	13	HBS1L	TTC37	ZCCHC11	SAMD4A	RC3H1	ZFP36	CNOT6	CNOT7	PDE12	POLR2D	PABPC1	EIF4E	DCP2
regulation of programmed cell death (GO:0043067)	0.300048	0.997865	49	CD40	BMP10	CHM	BRCA1	TM7SF3	CLU	STK10	CASP10	TRIM24	NEK1	TP63	BNIP3L	APAF1	ACTN1	NME1	TOX3	BIRC5	SGK3	TNIK	SGK2	BIRC2	BIRC3	KANK2	PHLPP1	AMIGO2	OMA1	PRDX2	BCL2L11	TP53BP2	TNFRSF14	RIPK1	MAP2K6	ZNF420	MAP3K2	GDF11	MOAP1	TGFB2	MAP3K1	BNIP3	INHBA	GDF5	BMP5	BMP4	TAOK3	STK24	TAOK1
regulation of monocyte differentiation (GO:0045655)	0.476439	0.997865	3	CDK6	MYC	FOXP1
positive regulation of filopodium assembly (GO:0051491)	0.452859	0.997865	5	TENM1	NLGN1	DPYSL3	CCR7	FNBP1L
nitric oxide mediated signal transduction (GO:0007263)	0.522102	0.997865	3	KCNC2	CD36	AGTR2
vesicle docking (GO:0048278)	0.522024	0.997865	4	NSF	CAV2	STX7	STX2
positive regulation of interleukin-6 secretion (GO:2000778)	0.361117	0.997865	4	F2R	TLR8	TWIST1	HMGB1
negative regulation of protein tyrosine kinase activity (GO:0061099)	0.522024	0.997865	4	SH3BP5	CBL	SOCS4	SNX6
dendritic spine organization (GO:0097061)	0.417142	0.997865	5	INSR	CTNND2	EPHB1	SHANK2	EPHB3
regulation of synaptic vesicle cycle (GO:0098693)	0.625923	0.997865	2	PREPL	RAB5A
fatty acid metabolic process (GO:0006631)	0.344892	0.997865	20	SCARB2	ACBD5	ABCD2	PON2	ALOX15	ACSM2A	PEX2	PTGS2	ALKBH7	CYP4F11	CYP4F12	ACSM2B	ALDH5A1	ACOX1	ALOX5AP	NDUFAB1	ANGPTL3	LPIN1	PPARGC1A	CBR4
entry of bacterium into host cell (GO:0035635)	0.379751	0.997865	3	CTNND1	CBL	MET
mitochondrial respiratory chain complex III biogenesis (GO:0097033)	0.576568	0.997865	2	UQCC2	UQCC1
hyperosmotic response (GO:0006972)	0.401685	0.997865	2	YBX3	TLR3
epithelial structure maintenance (GO:0010669)	0.379751	0.997865	3	CXADR	POLR2D	PBLD
chemical synaptic transmission, postsynaptic (GO:0099565)	0.34672	0.997865	7	GABRA2	GABRA1	GRID2	GRIN2A	GABRA4	GABRA3	GRIN2B
establishment of integrated proviral latency (GO:0075713)	0.464163	0.997865	2	LIG4	PPIA
regulation of centriole replication (GO:0046599)	0.522102	0.997865	3	KAT2B	TRIM37	BRCA1
camera-type eye morphogenesis (GO:0048593)	0.625923	0.997865	2	NF1	LRP6
negative regulation of glial cell differentiation (GO:0045686)	0.464163	0.997865	2	NF1	F2
regulation of cardiac muscle contraction by regulation of the release of sequestered calcium ion (GO:0010881)	0.361117	0.997865	4	ATP1A2	CALM3	CALM1	SLC8A1
multivesicular body organization (GO:0036257)	0.459821	0.997865	6	VTA1	VPS4A	CHMP2B	RAB27A	STAM	VPS37B
regulation of striated muscle contraction (GO:0006942)	0.395269	0.997865	6	HCN4	BMP10	TNNI1	ATP1A2	CALM3	CALM1
negative regulation of cellular response to insulin stimulus (GO:1900077)	0.487949	0.997865	5	PID1	GRB10	ENPP1	TSC1	PTPN2
ERAD pathway (GO:0036503)	0.332225	0.997865	14	USP13	HSPA5	SYVN1	ERLIN1	ERLIN2	UBE2G2	2019-03-06	HSP90B1	PSMC4	DNAJC10	UBQLN1	DNAJB9	UGGT2	UGGT1	DZIP3
G-protein coupled glutamate receptor signaling pathway (GO:0007216)	0.522102	0.997865	3	DAGLA	HOMER2	GRM1
cell part morphogenesis (GO:0032990)	0.625923	0.997865	2	PID1	MFF
regulation of autophagosome maturation (GO:1901096)	0.329794	0.997865	3	FYCO1	PHF23	SMCR8
G1/S transition of mitotic cell cycle (GO:0000082)	0.328578	0.997865	20	ACVR1	KLF11	RANBP3	MCM8	RPA1	INHBA	BACH1	GSPT1	PHF8	CUL4A	WEE1	CDK6	TFDP1	ORC6	TFDP2	MYC	ORC2	MCM4	MCM6	EIF4E
negative regulation of cell activation (GO:0050866)	0.576568	0.997865	2	PDGFB	F2
positive regulation of mitotic nuclear division (GO:0045840)	0.387204	0.997865	8	EDN1	NIPBL	RANBP3	RGCC	INSR	NSMCE2	PDGFB	PHIP
angiotensin maturation (GO:0002003)	0.625923	0.997865	2	MME	KCTD11
positive regulation of histone methylation (GO:0031062)	0.417142	0.997865	5	PAXIP1	KMT2A	MTF2	TET1	BRCA1
T-helper 17 cell differentiation (GO:0072539)	0.464163	0.997865	2	IRF4	RORA
cellular response to growth factor stimulus (GO:0071363)	0.327727	0.997865	26	DLX1	SYAP1	PDGFB	NR3C1	EGFR	ZFP36L2	DSTYK	ZFP36	HAS2	CPNE3	SOX6	SOX5	ACVR1	MAPK14	ACVR2A	PHOX2B	RUNX2	EEF1A1	BMP4	NR4A1	ACAP2	RAPGEF2	PRKD1	TDGF1	CD44	BMPR1A
negative regulation of cell cycle phase transition (GO:1901988)	0.335925	0.997865	2	RGCC	ZFP36L2
Golgi to endosome transport (GO:0006895)	0.483281	0.997865	4	DOPEY1	MON2	VPS13C	AP1AR
embryonic appendage morphogenesis (GO:0035113)	0.428834	0.997865	3	TGFB2	CYP26B1	LRP6
methionine metabolic process (GO:0006555)	0.625923	0.997865	2	AHCY	MTR
negative regulation of lipase activity (GO:0060192)	0.464163	0.997865	2	RGS2	ANGPTL3
sphingomyelin metabolic process (GO:0006684)	0.522595	0.997865	2	SAMD8	SGMS2
GPI anchor biosynthetic process (GO:0006506)	0.491482	0.997865	6	PGAP1	PIGN	PIGP	PLAUR	MPPE1	PIGX
peptidyl-arginine omega-N-methylation (GO:0035247)	0.522595	0.997865	2	PRMT6	PRMT2
cardiac muscle tissue development (GO:0048738)	0.27892	0.997865	8	AKAP13	SGCD	TBX20	POLR2D	SIK1	PROX1	BMP5	BMPR1A
positive regulation of response to external stimulus (GO:0032103)	0.363373	0.997865	17	ANKRD17	PTGER4	IL33	CNTF	TSLP	CCL4L1	CD180	PDGFB	PLG	F2	PPM1F	PUM2	MAPK13	IL23A	TNFSF4	OPTN	TLR3
acylglycerol acyl-chain remodeling (GO:0036155)	0.464163	0.997865	2	AWAT2	MGLL
regulation of establishment of cell polarity (GO:2000114)	0.522102	0.997865	3	ARFGEF1	ROCK2	KRIT1
positive regulation of myotube differentiation (GO:0010831)	0.565486	0.997865	3	MYOG	SMYD1	MAPK14
negative regulation of DNA recombination (GO:0045910)	0.565486	0.997865	3	KLHL15	MSH3	POLK
mitotic sister chromatid cohesion (GO:0007064)	0.522102	0.997865	3	NAA50	NIPBL	PDS5A
regulation of BMP signaling pathway (GO:0030510)	0.363935	0.997865	11	BMP4	SMAD2	DLX1	BMPER	XIAP	SOSTDC1	SOX11	ZNF423	GDF5	CYR61	DAND5
post-Golgi vesicle-mediated transport (GO:0006892)	0.410151	0.997865	11	DOPEY1	RAB10	CHIC2	MON2	VPS13C	EXOC6	SCAMP1	STEAP2	SORL1	LLGL1	VTI1B
positive regulation of chromosome organization (GO:2001252)	0.443334	0.997865	4	RAD21	DHX36	ATRX	LIG4
marginal zone B cell differentiation (GO:0002315)	0.401685	0.997865	2	NOTCH2	DLL1
regulation of respiratory burst (GO:0060263)	0.576568	0.997865	2	CAMK1D	INSR
branched-chain amino acid catabolic process (GO:0009083)	0.522024	0.997865	4	ALDH6A1	AUH	DBT	BCKDHB
cell morphogenesis involved in neuron differentiation (GO:0048667)	0.290147	0.997865	19	LINGO2	MEF2A	APP	ECM2	RYK	DCC	SDC2	KERA	ANK3	RAB10	OPHN1	SLITRK1	SLITRK3	SLITRK6	TMEM106B	SLIT3	NRCAM	CNTN4	LLGL1
positive regulation of SMAD protein import into nucleus (GO:0060391)	0.379751	0.997865	3	NUP93	BMP4	BMPR1A
positive regulation of mitotic cell cycle (GO:0045931)	0.403659	0.997865	10	GEN1	APP	EDN1	DUSP3	RGCC	INSR	TPR	PDGFB	PHIP	EIF4E
nucleotide-sugar metabolic process (GO:0009225)	0.428834	0.997865	3	EXTL2	SLC35A3	UGP2
positive regulation of protein exit from endoplasmic reticulum (GO:0070863)	0.576568	0.997865	2	TMEM30A	SORL1
sphingolipid biosynthetic process (GO:0030148)	0.336797	0.997865	13	CERS3	CERS4	SAMD8	CERS6	PPM1L	ST8SIA1	ELOVL2	ELOVL6	SGMS2	SPTLC3	ACER3	PRKD1	SPTSSA
cofactor biosynthetic process (GO:0051188)	0.459821	0.997865	6	SLC25A16	ISCA2	NFS1	BDH2	PPCS	MBIP
vasodilation (GO:0042311)	0.522595	0.997865	2	AGTR2	SOD2
regulation of receptor recycling (GO:0001919)	0.606359	0.997865	3	NSF	AP1AR	OPTN
negative regulation of cytoskeleton organization (GO:0051494)	0.417142	0.997865	5	ARFGEF1	KANK2	LIMA1	PLEKHH2	PFN2
postreplication repair (GO:0006301)	0.421986	0.997865	9	RFC1	PAPD7	RPA1	UBE2N	ZBTB1	UBE2V2	SPRTN	UBE2A	BRCA1
NADH metabolic process (GO:0006734)	0.725709	0.997865	1	MDH1B
negative regulation of autophagosome assembly (GO:1902902)	0.576568	0.997865	2	PHF23	SMCR8
protein targeting to lysosome (GO:0006622)	0.443334	0.997865	4	SCARB2	VPS4A	SORL1	CLU
mitotic chromosome condensation (GO:0007076)	0.522102	0.997865	3	NIPBL	PAPD7	PHF23
regulation of catabolic process (GO:0009894)	0.379751	0.997865	3	ITGB1	FAP	NEDD4L
positive regulation of cAMP metabolic process (GO:0030816)	0.487949	0.997865	5	CXCL10	IAPP	CALM3	CALM1	TSHR
modulation of chemical synaptic transmission (GO:0050804)	0.320753	0.997865	16	USP46	GRIA2	APP	NLGN1	GRID2	PXK	NLGN2	MCTP1	CLSTN2	BDNF	GRID1	CLSTN1	ATP1A2	GRM1	OPHN1	EIF4EBP2
positive regulation of pathway-restricted SMAD protein phosphorylation (GO:0010862)	0.284057	0.997865	10	ACVR1	BMP4	GDF11	TGFB2	BMP10	INHBA	GDF5	ACVR2A	BMP5	BMPR1A
regulation of endocytosis (GO:0030100)	0.285975	0.997865	14	RAB4A	MCTP1	STON1	NEDD4L	STON2	DLL1	OPHN1	RUFY2	BMP2K	AAK1	ITGAV	PRKD1	RAB5A	CD177
metanephric nephron tubule development (GO:0072234)	0.401685	0.997865	2	PKD2	POU3F3
endoplasmic reticulum mannose trimming (GO:1904380)	0.443334	0.997865	3	SYVN1	2019-03-06	UGGT2	UGGT1
nerve growth factor signaling pathway (GO:0038180)	0.576568	0.997865	2	BDNF	RAPGEF2
regulation of peptidyl-threonine phosphorylation (GO:0010799)	0.465256	0.997865	7	APP	WNK3	MAPK1	CALM3	S1PR2	CALM1	UBE2K
autophagosome assembly (GO:0000045)	0.410151	0.997865	11	ATG3	RAB1A	UBXN2B	RAB23	UBQLN1	MFN2	ULK2	ULK1	PIK3C3	WIPI2	ATG5
positive regulation of immunoglobulin secretion (GO:0051024)	0.522595	0.997865	2	TNFSF4	POLR2D
mitochondrial respiratory chain complex IV biogenesis (GO:0097034)	0.522024	0.997865	4	COA4	SCO1	COX18	COX20
positive regulation of nitric-oxide synthase activity (GO:0051000)	0.565486	0.997865	3	NUS1	AGTR2	HIF1A
protein insertion into membrane (GO:0051205)	0.379751	0.997865	3	RTP4	COX18	EGFR
ncRNA metabolic process (GO:0034660)	0.376372	0.997865	7	PIWIL2	DDX17	ZCCHC11	BCDIN3D	DROSHA	DICER1	TARBP2
collagen metabolic process (GO:0032963)	0.670682	0.997865	2	ADAMTS3	HIF1A
positive regulation of defense response (GO:0031349)	0.384694	0.997865	14	PTGER4	IL33	TSLP	CCL4L1	MAPK13	PLSCR1	IL23A	POLR3D	TNFSF4	POLR3F	TLR8	POLR3G	OPTN	TLR3
actomyosin structure organization (GO:0031032)	0.324666	0.997865	14	BMP10	MYBPC1	CDC42BPB	CDC42BPA	LMOD2	FRMD3	EPB41L5	ALKBH4	FRMD6	SIX4	MYO18A	MYOZ3	MYOZ2	MYH10
bone morphogenesis (GO:0060349)	0.565486	0.997865	3	TFAP2A	CYP26B1	LTF
endodermal cell differentiation (GO:0035987)	0.491482	0.997865	6	SETD2	COL11A1	HMGA2	ITGAV	RTF1	INHBA
regulation of platelet-derived growth factor receptor-beta signaling pathway (GO:2000586)	0.522595	0.997865	2	PDGFB	PTPN2
guanosine-containing compound metabolic process (GO:1901068)	0.565486	0.997865	3	RAB23	GNAI3	AK4
heart process (GO:0003015)	0.625923	0.997865	2	SGCD	TRDN
positive regulation of protein localization to cell periphery (GO:1904377)	0.396124	0.997865	9	DPP10	ITGB1	PRKCI	IFNG	KIF5B	WNK3	AGR2	GNAI1	EGFR
negative regulation of platelet aggregation (GO:0090331)	0.464163	0.997865	2	CD9	PRKG1
striated muscle cell development (GO:0055002)	0.483281	0.997865	4	MYOZ3	MYOZ2	SLC8A1	LMOD2
positive regulation of natural killer cell mediated cytotoxicity (GO:0045954)	0.606359	0.997865	3	CADM1	CD226	PVR
glycogen biosynthetic process (GO:0005978)	0.40249	0.997865	4	UGP2	PPP1R3C	GBE1	PGM2L1
primary alcohol metabolic process (GO:0034308)	0.443334	0.997865	4	RDH10	POLR2D	NAPEPLD	CYP1B1
negative regulation of dendrite development (GO:2000171)	0.401685	0.997865	2	DCC	RAPGEF2
positive regulation of sodium ion transport (GO:0010765)	0.428834	0.997865	3	CNKSR3	WNK3	ANK3
negative regulation of interleukin-12 production (GO:0032695)	0.379751	0.997865	3	TLR8	IRAK3	CMKLR1
protein depolymerization (GO:0051261)	0.452859	0.997865	5	CFL2	NCKAP5L	VPS4A	DSTN	MICAL2
embryonic forelimb morphogenesis (GO:0035115)	0.522595	0.997865	2	TFAP2A	NIPBL
positive regulation of mRNA metabolic process (GO:1903313)	0.379751	0.997865	3	NUDT21	CNOT7	RC3H1
regulation of synaptic vesicle exocytosis (GO:2000300)	0.606359	0.997865	3	NLGN1	PREPL	RAB5A
negative regulation of epithelial cell differentiation (GO:0030857)	0.670682	0.997865	2	IFNG	DLL1
regulation of transcription involved in cell fate commitment (GO:0060850)	0.401685	0.997865	2	RORA	PROX1
response to amyloid-beta (GO:1904645)	0.452859	0.997865	5	APP	CD36	TLR6	PSEN1	FPR2
cellular response to inorganic substance (GO:0071241)	0.361117	0.997865	4	KCNC2	ATRX	MTR	FOXO1
positive regulation of macrophage derived foam cell differentiation (GO:0010744)	0.565486	0.997865	3	MSR1	MAPK9	CD36
negative regulation of TOR signaling (GO:0032007)	0.387204	0.997865	8	PREX2	PRKAA1	PRKAA2	DEPTOR	TSC1	UBR1	RNF152	C12ORF66
zinc ion homeostasis (GO:0055069)	0.459821	0.997865	6	SLC30A9	SLC30A8	MT1A	SLC30A5	SLC39A6	SLC39A14
positive regulation of cell adhesion mediated by integrin (GO:0033630)	0.476439	0.997865	3	TGFB2	SFRP2	CXCL13
positive regulation of nuclear division (GO:0051785)	0.452859	0.997865	5	EDN1	RGCC	INSR	PDGFB	PHIP
response to magnesium ion (GO:0032026)	0.464163	0.997865	2	SLC41A1	ANK3
negative regulation of fat cell differentiation (GO:0045599)	0.491482	0.997865	6	ANKRD26	ENPP1	RORA	FOXO1	ZFP36L2	RUNX1T1
positive regulation of cholesterol storage (GO:0010886)	0.725709	0.997865	1	MSR1
integrin-mediated signaling pathway (GO:0007229)	0.410151	0.997865	11	ITGB1	DST	RCC2	ITGB3	ANGPTL3	NEDD9	ITGAV	MADCAM1	ZNF304	CD47	PRKD1
negative regulation of interleukin-6 production (GO:0032715)	0.417142	0.997865	5	GHSR	C5AR2	TNFAIP3	PTPN22	IRAK3
protein import into nucleus, translocation (GO:0000060)	0.452859	0.997865	5	IFNG	TNPO1	RANBP6	KPNB1	RBM22
regulation of microtubule depolymerization (GO:0031114)	0.559318	0.997865	4	APC	FGF13	TTBK2	CLASP2
negative regulation of peptide hormone secretion (GO:0090278)	0.565486	0.997865	3	CRHBP	NOV	KCNB1
riboflavin metabolic process (GO:0006771)	0.401685	0.997865	2	RFK	ENPP1
positive regulation of T cell differentiation (GO:0045582)	0.491482	0.997865	6	IL23A	TNFSF4	NKAP	ZBTB1	CD46	GLI3
chitin catabolic process (GO:0006032)	0.401685	0.997865	2	CHI3L2	CTBS
regulation of DNA-templated transcription, elongation (GO:0032784)	0.483281	0.997865	4	SUPT4H1	ZNF326	ERCC6	IWS1
positive regulation of lymphocyte migration (GO:2000403)	0.361117	0.997865	4	CXCL10	APP	CCL20	DOCK8
dermatan sulfate biosynthetic process (GO:0030208)	0.379751	0.997865	3	VCAN	DSEL	DSE
regulation of ATP metabolic process (GO:1903578)	0.469688	0.997865	8	NUP93	NUP205	UQCC2	TPR	NUP35	NUP43	RAE1	NUP37
cell differentiation involved in metanephros development (GO:0072202)	0.576568	0.997865	2	BMP4	POU3F3
regulation of glial cell differentiation (GO:0045685)	0.725709	0.997865	1	NF1
regulation of protein heterodimerization activity (GO:0043497)	0.401685	0.997865	2	BCL2	CD36
transport of virus (GO:0046794)	0.452428	0.997865	10	NUP93	NUP205	TPR	NUP35	KPNA4	NUP43	VPS37B	RAE1	KPNB1	NUP37
B cell differentiation (GO:0030183)	0.403659	0.997865	10	TPD52	ITGB1	ADAM17	VCAM1	IFNE	NFAM1	DNAJB9	AICDA	PTPN2	IFNW1
negative regulation of fatty acid metabolic process (GO:0045922)	0.379751	0.997865	3	ERLIN1	ERLIN2	BRCA1
dermatan sulfate proteoglycan biosynthetic process (GO:0050651)	0.522102	0.997865	3	VCAN	DSEL	DSE
peptidyl-asparagine modification (GO:0018196)	0.370312	0.997865	9	LMAN1	ST6GAL1	MCFD2	SYVN1	ST3GAL6	UBE2G2	HIF1AN	UGGT2	UGGT1
regulation of calcium ion transmembrane transport via high voltage-gated calcium channel (GO:1902514)	0.464163	0.997865	2	CACNB2	SESTD1
regulation of histone phosphorylation (GO:0033127)	0.576568	0.997865	2	RPS6KA5	TWIST1
long-chain fatty acid catabolic process (GO:0042758)	0.401685	0.997865	2	AIG1	CYP4F12
regulation of osteoblast proliferation (GO:0033688)	0.565486	0.997865	3	EIF2AK2	CYR61	LTF
regulation of vasculature development (GO:1901342)	0.362772	0.997865	6	HEY1	NF1	CXCL13	TSPAN12	FGF2	PROK1
positive regulation of leukocyte apoptotic process (GO:2000108)	0.522595	0.997865	2	RAPGEF2	PIK3CB
positive regulation of nitrogen compound metabolic process (GO:0051173)	0.361117	0.997865	4	MTPN	APP	HPN	PDGFB
negative regulation of reactive oxygen species metabolic process (GO:2000378)	0.606359	0.997865	3	TFAP2A	SIRT5	BRCA1
cellular protein catabolic process (GO:0044257)	0.371701	0.997865	12	BNIP3L	CTSO	FAP	BNIP3	CAPN2	YME1L1	RIPK1	UBE2G2	AP2B1	IDE	CTSS	CLPX
cellular response to interferon-beta (GO:0035458)	0.625923	0.997865	2	UBE2G2	UBE2K
positive regulation of wound healing (GO:0090303)	0.487949	0.997865	5	ARFGEF1	F2R	F2	RREB1	MYLK
membrane protein intracellular domain proteolysis (GO:0031293)	0.417142	0.997865	5	ADAM17	TRAF6	SPPL2A	PSEN1	DLL1
[truncated: 2,619 more rows]
[truncated: 321 more columns]

## Sheet: B. Cellular Component
Term	P-value	Adjusted P-value	Gene Count	Genes
H3 histone acetyltransferase complex (GO:0070775)	0.00485916	0.465111	5	ING5	BRD1	BRPF1	KAT6B	KAT6A
MOZ/MORF histone acetyltransferase complex (GO:0070776)	0.00485916	0.465111	5	ING5	BRD1	BRPF1	KAT6B	KAT6A
DNA-directed RNA polymerase III complex (GO:0005666)	0.00846675	0.465111	8	CRCP	POLR3A	POLR3D	POLR3E	POLR3F	POLR3G	POLR2F	POLR3K
fibrillar center (GO:0001650)	0.00337892	0.465111	35	IPO11	AKNA	NUFIP1	FBLIM1	RNMT	MRI1	TFCP2L1	AFF4	CHD1	LIPA	MTDH	COIL	HERC4	DSN1	RPS6KA6	ORC6	UBD	POLR2F	SNRPB2	TRIM27	RAE1	RREB1	NOP58	SAMD4A	PLRG1	PAX5	THAP1	ICK	ARHGAP32	NFIB	CAMK4	UBE2N	TAF4B	PAFAH1B2	HOXB5
lamellipodium membrane (GO:0031258)	0.00941997	0.465111	5	ITGB3	SLC39A6	ITGAV	ANTXR1	CD44
nuclear speck (GO:0016607)	0.00434006	0.465111	68	TENM1	HP1BP3	NCAPG2	GPATCH2	PHF7	NR3C1	AFF2	NAMPT	OIP5	BCAS2	DDX17	BNIP3L	BRD1	PRPF40A	IL16	PRPF4B	CDYL	PLRG1	UHMK1	FNDC1	SARNP	KAT6A	BMP2K	SRSF2	SRSF3	FAM76B	HOXB2	PPIG	SREK1	SRSF5	SLU7	GLYR1	FTO	PRKAA1	PRKAA2	RBM8A	YTHDC1	SRSF1	HIF1A	CCNB3	BCLAF1	POLR2D	LPXN	SNRPB2	ZC3H13	SF3B1
nuclear body (GO:0016604)	0.0091913	0.465111	127	MDC1	PRDM5	GPATCH2	NR3C1	ALKBH8	LSM11	NAMPT	OIP5	SNRPD3	TRIM22	SCN1A	DDX17	BNIP3L	SCAF11	NSMCE2	PRPF4B	CDYL	PIAS2	UHMK1	PIAS1	FNDC1	SARNP	KAT6A	SRSF2	YME1L1	SRSF3	FAM76B	HOXB2	PPIG	SREK1	SRSF5	GLYR1	FTO	RBM8A	YTHDC1	CSTF2	ZBTB1	ZBTB4	HIF1A	MTDH	CCNB3	DSN1	HMBOX1	HIVEP1	LPXN	ALX1
nucleolar part (GO:0044452)	0.00846302	0.465111	38	IPO11	AKNA	NUFIP1	FBLIM1	RNMT	MRI1	TFCP2L1	AFF4	CHD1	LIPA	MTDH	COIL	HERC4	DSN1	RPS6KA6	ORC6	UBD	TWISTNB	SURF6	POLR2F	SNRPB2	TRIM27	RAE1	RREB1	NOP58	SAMD4A	PLRG1	PAX5	THAP1	ICK	ARHGAP32	NFIB	POLR1B	CAMK4	UBE2N	TAF4B	PAFAH1B2	HOXB5
RISC-loading complex (GO:0070578)	0.0162459	0.467204	5	ZFP36	AGO3	AGO1	DICER1	TARBP2
RNAi effector complex (GO:0031332)	0.0162459	0.467204	5	AGO3	AGO1	DICER1	EIF4E	DCP2
RISC complex (GO:0016442)	0.0162459	0.467204	5	AGO3	AGO1	DICER1	EIF4E	DCP2
GABA-A receptor complex (GO:1902711)	0.0120571	0.467204	8	GABRA2	GABRB3	GABRR2	GABRB2	GABRA1	GABRB1	GABRA4	GABRA3
specific granule membrane (GO:0035579)	0.0165591	0.467204	24	TMEM30A	ITGAM	CD93	ATP8A1	CMTM6	PLAUR	CYBB	SLC2A3	ANO6	FPR2	PLD1	SCAMP1	STK10	RAB44	TSPAN14	RAP2B	RAB37	MLEC	OLR1	ITGAV	CD47	CD36	CD33	CD177
membrane raft (GO:0045121)	0.0148659	0.467204	30	ITGB1	APP	ITLN1	FAIM2	PSEN1	CBL	DLL1	EGFR	GJA1	CAPN2	PGK1	CD36	PAG1	GPM6B	GHSR	CXADR	ANGPT1	CAV2	ERLIN2	TGFBR2	PIKFYVE	PLSCR1	ADAM17	RAP2B	FAS	CD226	TEK	TLR6	TDGF1	PI4K2A
integral component of plasma membrane (GO:0005887)	0.0203466	0.535795	276	APP	TFRC	HHIP	AQP2	SLC4A4	CLDN1	EDNRA	GJA1	TRIM27	EPHB1	EPHB4	CMKLR1	EPHB3	ACVR1	ENTPD1	EPHA6	CXADR	MUSK	KCNK12	SLC11A2	SLC6A11	FRS2	SLC5A7	KCNQ3	KCNQ5	CD226	AGTR2	PRKD1	PI4K2A	PTGFR	ADCYAP1R1	PCDH10	HPN	ABCB5	LPAR1	SLCO5A1	FPR3	SLC5A1	FPR2	PCDH19	PCDH18	SLC5A3	GRIN2A	TSPAN8	FLRT2	PCDHA1
platelet alpha granule membrane (GO:0031092)	0.0219235	0.541235	7	TMX3	PCDH7	CD109	ITGB3	CD9	PHACTR2	CD36
micro-ribonucleoprotein complex (GO:0035068)	0.0319154	0.550486	4	AGO1	DICER1	TNRC6A	TARBP2
dystrophin-associated glycoprotein complex (GO:0016010)	0.0288946	0.550486	6	SNTG2	SGCD	SNTG1	SGCB	SNTB1	SNTB2
ruffle membrane (GO:0032587)	0.0304174	0.550486	15	ITGB1	C2CD5	ITGB3	IFIT5	TIRAP	NME1	EEF1A1	ADAM17	FAP	APC	SNTG1	DLC1	PSD3	ITGAV	CLASP2
nuclear DNA-directed RNA polymerase complex (GO:0055029)	0.0258842	0.550486	15	POLR2M	CRCP	RPRD2	RPAP2	POLR3A	POLR3D	POLR1B	POLR3E	TWISTNB	POLR2D	POLR3F	POLR3G	POLR2F	POLR3K	PPARGC1A
microbody (GO:0042579)	0.0338513	0.550486	23	PXT1	GSTK1	IDI1	ACBD5	HSDL2	ABCD2	PEX19	IDH1	EPHX2	TYSND1	IDE	MFF	PEX13	PEX26	PLA2G16	TMEM135	AKAP11	AMACR	PEX3	ACOX1	ISOC1	TRIM37	PIK3C3
peroxisome (GO:0005777)	0.0338513	0.550486	23	PXT1	GSTK1	IDI1	ACBD5	HSDL2	ABCD2	PEX19	IDH1	EPHX2	TYSND1	IDE	MFF	PEX13	PEX26	PLA2G16	TMEM135	AKAP11	AMACR	PEX3	ACOX1	ISOC1	TRIM37	PIK3C3
specific granule (GO:0042581)	0.0276088	0.550486	37	ITGAM	ATP8A1	STXBP3	SLC2A3	FPR2	PLD1	CLCN3	STK10	RAB44	TIMP2	MLEC	OLR1	ITGAV	CD36	B2M	CD33	CD177	TMEM30A	CD93	CMTM6	PLAUR	ANXA11	RAB27A	CYBB	ANO6	SCAMP1	ERP44	TSPAN14	RAP2B	RAB37	DLC1	QPCT	CD47	FRK	KPNB1	VCL	LTF
nucleoplasm part (GO:0044451)	0.0362345	0.550486	83	MDC1	CRCP	THRB	PHF20	PRDM5	PPWD1	ASH2L	AFF3	HOXC10	ALKBH8	COIL	LSM11	ZIC2	UBXN7	TOPBP1	SNRPD3	TRIM22	SCN1A	NCOA2	KLF11	SCAF11	ATRX	NSMCE2	MSL3	MED4	GTF2F2	MED6	PAPD7	ESRP1	YME1L1	GTF2A1	GTF2A2	PLEKHH2	C11ORF54	PAXIP1	NUFIP2	KMT2A	SATB1	CSTF2	ZBTB1	RPAP2	PRDM10	ZBTB4	HIF1A	RNF2	MTDH
actomyosin (GO:0042641)	0.0284187	0.550486	14	NEBL	TPM3	FBLIM1	SYNPO2	ACTN1	CDC42BPB	CDC42BPA	SHROOM4	MYLK	LIMA1	DAAM1	MYO18A	TEK	MYH10
actin cytoskeleton (GO:0015629)	0.0357364	0.550486	62	CLIC5	ONECUT2	WIPF1	WIPF2	IFIT5	LMOD2	MYLK	AKAP13	OPHN1	CAPN2	MYO18A	KNTC1	MYOZ3	TOPBP1	MYOZ2	ACTR3	MYBPC1	PPP1R12A	TPM3	ACTN1	PAWR	COBL	TSC1	SHROOM4	MTSS1	CD2AP	EEF1A1	ADAM17	PEAK1	SPECC1L	LANCL2	GAS2	HAP1	LLGL1	GCOM1	PLEKHH2	DCTN2	SYNPO2	DCTN4	IQGAP2	CORO1C	LIMA1	CALD1	STK38L	FLNB	PDLIM5
small nuclear ribonucleoprotein complex (GO:0030532)	0.0393126	0.575129	7	ARFGEF1	SF3B3	LSM11	SNRPD1	SNRPE	SNRPD3	SLU7
pericentric heterochromatin (GO:0005721)	0.0534785	0.645135	5	HELLS	CBX5	ATRX	SNAI1	IKZF1
dendrite membrane (GO:0032590)	0.0506439	0.645135	7	GABRA2	GABRA1	KCNB1	KCNC2	GABRA4	INSR	GABRA3
U2-type catalytic step 2 spliceosome (GO:0071007)	0.0538973	0.645135	9	PPIL1	SNRPD1	CDC5L	SNRPE	SNRPB2	PLRG1	SNRPD3	BCAS2	RBM22
platelet alpha granule (GO:0031091)	0.0469107	0.645135	22	FAM49B	APP	TGFB2	APOOL	STXBP3	PCDH7	ITGB3	ACTN1	FGG	PDGFB	PLG	PPBP	THBS2	CLU	F5	TMX3	CD109	CD9	PHACTR2	CD36	NHLRC2	VTI1B
cortical actin cytoskeleton (GO:0030864)	0.0527961	0.645135	14	POLR2M	PLEKHH2	WIPF1	WIPF2	RDX	SHROOM4	EEF1A1	AKAP13	DLC1	CAPN2	LANCL2	LLGL1	GCOM1	SPTBN2
Golgi subcompartment (GO:0098791)	0.0497403	0.645135	95	SCARB2	SLC35B3	SCOC	SLC35B4	ATP8A1	GOLIM4	XYLT1	MANEA	BICD1	HS6ST2	HS2ST1	GJA1	CNST	MAN1A2	GLIPR2	GOLGA1	DSE	TMED3	MYO18A	TMED2	B2M	SH3GL2	C3ORF58	RAB2A	NSF	SLC30A6	ST6GAL1	CHST6	RBFOX1	SACM1L	PAQR3	PIFO	NOSIP	ZDHHC13	HLA-A	SCAMP1	IL17RD	RAB33B	TAPBP	DOPEY1	RAB30	TMBIM4	TLR8	RAB38	PRKD1	TBC1D23
endoribonuclease complex (GO:1902555)	0.0719903	0.655691	5	ZFP36	AGO3	AGO1	DICER1	TARBP2
serine/threonine protein kinase complex (GO:1902554)	0.0588411	0.655691	8	ACVR1	PRDX3	ACVR1C	PHKG2	IFIT5	PHKB	MAP3K7	TGFBR2
melanosome (GO:0042470)	0.0638342	0.655691	7	DCT	TMEM33	ITGB3	TYRP1	RAB27A	RAB38	RAB27B
pigment granule (GO:0048770)	0.0638342	0.655691	7	DCT	TMEM33	ITGB3	TYRP1	RAB27A	RAB38	RAB27B
mRNA cleavage and polyadenylation specificity factor complex (GO:0005847)	0.0684952	0.655691	6	NUDT21	CPSF7	CPSF6	CSTF2	SSU72	CSTF2T
chromosome, centromeric region (GO:0000775)	0.0676307	0.655691	13	HELLS	CBX5	RCC2	ATRX	PDS5A	CENPF	STAG2	FAM172A	RAD21	NUF2	SNAI1	BIRC5	OIP5
chromosome (GO:0005694)	0.0576733	0.655691	23	SMARCE1	TOP2A	MDC1	SETD2	PBRM1	HP1BP3	LIG4	HMGA2	CDYL	HMGB1	BRCA1	PDS5A	HDAC8	NIPBL	STAG2	FIGNL1	RAD21	BIRC5	INTS7	HORMAD2	HORMAD1	TOPBP1	LLPH
contractile actin filament bundle (GO:0097517)	0.073039	0.655691	11	LIMA1	DAAM1	NEBL	TPM3	FBLIM1	SYNPO2	ACTN1	TEK	MYH10	SHROOM4	MYLK
stress fiber (GO:0001725)	0.073039	0.655691	11	LIMA1	DAAM1	NEBL	TPM3	FBLIM1	SYNPO2	ACTN1	TEK	MYH10	SHROOM4	MYLK
Golgi membrane (GO:0000139)	0.0676146	0.655691	86	SCARB2	SLC35B3	APP	SLC35B4	AP4E1	GOLIM4	XYLT1	MANEA	HS6ST2	HS2ST1	GJA1	MAN1A2	GLIPR2	DSE	TMED3	TMED2	B2M	SH3GL2	C3ORF58	RAB2A	SLC30A6	ST6GAL1	CHST6	SACM1L	PAQR3	NOSIP	ZDHHC13	GOLGA8J	HLA-A	IL17RD	GOLGA8N	RAB33B	TAPBP	RAB30	TLR8	B4GALT6	OPTN	TLR3	LLGL1	GOLGA8A	HLA-DQB1	NOTCH2	RAB1A	HS3ST3A1	LMAN2L	GOSR1
nuclear periphery (GO:0034399)	0.0643489	0.655691	19	TENM1	AHCTF1	NUP205	NUFIP1	PRPF40A	RANBP6	NUP93	CENPF	SFPQ	SCAF8	STAG2	ATXN1	RAD21	TPR	SMARCAD1	ZNF326	TNPO1	KPNB1	RUNX1T1
heterochromatin (GO:0000792)	0.0845171	0.741872	11	RNF20	MECP2	HELLS	CBX5	ATRX	ORC2	SNAI1	SMARCAD1	HMGA2	UBE2A	RRP8
protein kinase complex (GO:1902911)	0.0986211	0.846855	3	INSR	NEK10	MAP3K5
endoplasmic reticulum lumen (GO:0005788)	0.103556	0.870309	54	APP	COL14A1	TXNDC12	CHRDL1	CYR61	TXNDC16	ADAMTS5	STS	EVA1A	COL10A1	B2M	COLGALT1	COL25A1	FGG	COL23A1	PLAUR	F2	F5	TRDN	DNAJC3	MINPP1	VCAN	COL4A1	IL23A	COL4A3	COL8A2	COL6A3	COL11A1	SDC2	PDGFB	PTGS2	LTBP1	COL19A1	HSP90B1	KDELC2	ARSK	PDGFC	UGGT2	UGGT1	ARSB	CRTAP	HSPA5	COL24A1	GCG	BMP4	ERP44
azurophil granule membrane (GO:0035577)	0.111238	0.915395	14	TMEM30A	ATP8A1	NFAM1	SURF4	CMTM6	LPCAT1	ATP11B	PRCP	DNAJC13	PSEN1	RAB44	GLIPR1	RAB37	CPNE3
endoplasmic reticulum-Golgi intermediate compartment (GO:0005793)	0.121542	0.979779	21	MCFD2	TICAM2	LMAN2L	HSPA5	SURF4	TMED7-TICAM2	RGMB	F5	TAPBP	ERP44	LMAN1	GJB2	CNIH1	RAB37	TMED3	TMED2	MPPE1	UGGT1	TMED5	PTPN2	BET1
nuclear replication fork (GO:0043596)	0.129488	0.993569	4	WDHD1	MMS22L	SMARCAD1	NUGGC
COPII-coated ER to Golgi transport vesicle (GO:0030134)	0.130799	0.993569	17	MCFD2	SEC24A	TICAM2	LMAN2L	TMED7-TICAM2	HLA-A	IER3IP1	F5	LMAN1	CNIH1	TMED3	HLA-DPB1	TMED2	B2M	TMED5	VTI1B	HLA-DQB1
azurophil granule (GO:0042582)	0.12586	0.993569	32	ATP8A1	GDI2	LPCAT1	PRCP	PSEN1	GNS	PLAC8	HEBP2	RAB44	DSN1	GLIPR1	TTR	GM2A	PSMD1	MAPK1	CPNE3	ARSB	TMEM30A	NHLRC3	TUBB	NFAM1	SURF4	CMTM6	STX7	ANXA11	ATP11B	DNAJC13	PA2G4	HRNR	DNAJC3	RAB37	FRK
commitment complex (GO:0000243)	0.183011	0.999833	3	SNRPD1	SNRPD3	UHMK1
death-inducing signaling complex (GO:0031264)	0.183011	0.999833	3	CASP10	FAS	RIPK1
messenger ribonucleoprotein complex (GO:1990124)	0.138645	0.999833	3	CPEB3	CPEB2	CPEB4
HFE-transferrin receptor complex (GO:1990712)	0.183011	0.999833	3	TFRC	B2M	BMPR1A
U7 snRNP (GO:0005683)	0.138645	0.999833	3	LSM11	SNRPE	SNRPD3
Golgi medial cisterna (GO:0005797)	0.183011	0.999833	3	MAN2A1	GOSR1	B3GALT6
methylosome (GO:0034709)	0.16327	0.999833	4	SNRPD1	SNRPE	SNRPD3	WDR77
axon initial segment (GO:0043194)	0.230434	0.999833	3	KCNQ3	NRCAM	ANK3
AP-2 adaptor complex (GO:0030122)	0.199781	0.999833	4	SGIP1	TBC1D5	AP2B1	EGFR
neurotransmitter receptor complex (GO:0098878)	0.16327	0.999833	4	GRID2	DLG2	SHISA9	SHANK2
clathrin coat of endocytic vesicle (GO:0030128)	0.199781	0.999833	4	SGIP1	TBC1D5	AP2B1	EGFR
ESC/E(Z) complex (GO:0035098)	0.205969	0.999833	5	HDAC2	RBBP4	AEBP2	MTF2	TRIM37
cytoplasmic stress granule (GO:0010494)	0.158834	0.999833	10	DYRK3	TIA1	ZFP36	NUFIP2	IGF2BP1	RC3H1	PABPC1	LARP4	EIF4E	PUM2
U12-type spliceosomal complex (GO:0005689)	0.181265	0.999833	7	SF3B3	SNRPD1	SNRPE	SNRPD3	ZCRB1	RNPC3	SF3B1
mitochondrial proton-transporting ATP synthase complex (GO:0005753)	0.559318	0.999833	4	MT-ATP6	ATP5A1	ATP5G1	MT-ATP8
NMDA selective glutamate receptor complex (GO:0017146)	0.230434	0.999833	3	GRIN2A	GRIN3A	GRIN2B
precatalytic spliceosome (GO:0071011)	0.204052	0.999833	8	SMU1	PRPF38A	SNRPD1	SNRPE	PLRG1	SNRPD3	DCAF4	BCAS2
endosome lumen (GO:0031904)	0.236701	0.999833	6	APP	AP4E1	LNPEP	B2M	PRLR	CTSS
FACIT collagen trimer (GO:0005593)	0.335925	0.999833	2	COL14A1	COL9A1
caveola (GO:0005901)	0.153319	0.999833	13	CAV2	INSR	F2R	ATP2B4	AKAP6	TFPI	CBL	CORO1C	LRP6	TGFBR2	DLC1	MAPK1	BMPR1A
cortical cytoskeleton (GO:0030863)	0.171995	0.999833	12	EEF1A1	POLR2M	AKAP13	PLEKHH2	TRPC4	DLC1	RDX	CAPN2	LANCL2	SHROOM4	LLGL1	GCOM1
integral component of mitochondrial membrane (GO:0032592)	0.153319	0.999833	13	COX18	BNIP3	MFF	FUNDC2	ABCB10	RHOT1	SCO1	MPC1	TIMM17A	COX11	L2HGDH	SLC25A4	MCU
early endosome membrane (GO:0031901)	0.172748	0.999833	15	RAB4A	FZD5	DNAJC13	HLA-A	EGFR	LRP6	RABGEF1	2019-03-01	SNX4	PIKFYVE	B2M	EPHB1	RAB5A	LLGL1	SNX6	VTI1B
calcium channel complex (GO:0034704)	0.236701	0.999833	6	SESTD1	TRPC4	CALM3	AKAP6	CALM1	MCU
CD40 receptor complex (GO:0035631)	0.329794	0.999833	3	CD40	TRAF6	BIRC2
integral component of cytoplasmic side of endoplasmic reticulum membrane (GO:0071458)	0.335925	0.999833	2	SPPL2A	PKD2
clathrin-coated endocytic vesicle membrane (GO:0030669)	0.204052	0.999833	8	FZD5	TYRP1	HLA-DPB1	CD9	AP2B1	ROR2	SH3GL2	HLA-DQB1
tertiary granule (GO:0070820)	0.164644	0.999833	33	SERPINB10	ASAH1	ITGAM	STXBP3	SLC2A3	PRCP	FPR2	PLD1	CTSS	NRAS	TIMP2	OLR1	METTL7A	CD58	B2M	CD33	CD177	PTPRN2	SIGLEC14	CD93	IDH1	STX7	CYBB	ANO6	PPBP	CLEC4C	TSPAN14	RAP2B	DLC1	QPCT	DSG1	CD47	LTF
catenin complex (GO:0016342)	0.206418	0.999833	7	APC	ANKAR	CDH11	CDH8	CDH18	CDH7	CDH19
intrinsic component of mitochondrial inner membrane (GO:0031304)	0.232787	0.999833	7	SCO1	MPC1	COX18	TIMM17A	COX11	L2HGDH	MCU
integral component of mitochondrial inner membrane (GO:0031305)	0.204052	0.999833	8	APOOL	SCO1	MPC1	COX18	TIMM17A	COX11	L2HGDH	MCU
filopodium tip (GO:0032433)	0.279717	0.999833	3	NLGN1	ABI2	MYO10
multivesicular body membrane (GO:0032585)	0.401685	0.999833	2	RAB27A	RAB27B
actin cortical patch (GO:0030479)	0.401685	0.999833	2	WIPF1	WIPF2
U2 snRNP (GO:0005686)	0.308935	0.999833	5	SNRPD1	SNRPE	SNRPB2	SNRPD3	SF3B1
cyclin-dependent protein kinase activating kinase holoenzyme complex (GO:0019907)	0.401685	0.999833	2	KDM5A	HOXC10
Cdc73/Paf1 complex (GO:0016593)	0.464163	0.999833	2	PEX2	RTF1
tertiary granule membrane (GO:0070821)	0.172748	0.999833	16	ITGAM	SIGLEC14	CD93	CYBB	SLC2A3	ANO6	FPR2	PLD1	CLEC4C	NRAS	TSPAN14	RAP2B	OLR1	CD47	CD33	CD177
Golgi cisterna (GO:0031985)	0.232528	0.999833	11	RAB30	MAN2A1	GOLGA6D	GOSR1	GCNT1	GOLGA8J	B3GALT6	SORL1	GOLGA8N	LLGL1	GOLGA8A
kinetochore microtubule (GO:0005828)	0.401685	0.999833	2	KNTC1	CLASP2
insulin-responsive compartment (GO:0032593)	0.401685	0.999833	2	RAB10	RAB4A
node of Ranvier (GO:0033268)	0.379751	0.999833	3	KCNQ3	ANK3	SCN2A
invadopodium (GO:0071437)	0.379751	0.999833	3	ITGB1	FAP	NOX1
sex chromosome (GO:0000803)	0.335925	0.999833	2	PCGF5	PCGF3
U1 snRNP (GO:0005685)	0.308935	0.999833	5	SNRPD1	SNRPE	PRPF40A	SNRPB2	SNRPD3
U4 snRNP (GO:0005687)	0.379751	0.999833	3	SNRPD1	SNRPE	SNRPD3
nuclear cyclin-dependent protein kinase holoenzyme complex (GO:0019908)	0.319645	0.999833	4	KDM5A	CCNT2	CCNT1	HOXC10
clathrin-coated vesicle membrane (GO:0030665)	0.211689	0.999833	17	SCARB2	SYT2	FZD5	TFRC	GAD1	TYRP1	GAD2	AP2B1	SYT9	EGFR	HLA-DPB1	CD9	ROR2	IL7R	RAB5A	SH3GL2	HLA-DQB1
npBAF complex (GO:0071564)	0.329794	0.999833	3	SMARCE1	SMARCC1	SMARCA2
intercalated disc (GO:0014704)	0.28844	0.999833	7	GJC1	GJA1	CTNNA3	AKAP6	ANK3	FGF13	SLC8A1
focal adhesion (GO:0005925)	0.149961	0.999833	68	SCARB2	ITGB1	MDC1	TES	ITGB3	GDI2	RND3	RPL9	PVR	RPL7	PPP1CB	PPP1CC	GJA1	CAPN2	ITGAV	CPNE3	TNS4	B2M	YWHAG	ACTR3	KLF11	PPP1R12A	MME	DST	ACTN1	PLAUR	RRAS2	YWHAZ	SENP1	ADAM17	PEAK1	RPL37A	MTF2	ITGA6	PABPC1	CD46	PPIA	PHLDB2	CD44	VCL	FBLN7	FBLIM1	SYNPO2	NEXN	EGFR	CORO1C
clathrin-sculpted gamma-aminobutyric acid transport vesicle membrane (GO:0061202)	0.464163	0.999833	2	GAD1	GAD2
BAF-type complex (GO:0090544)	0.361117	0.999833	4	SMARCE1	SMARCC1	PBRM1	SMARCA2
U5 snRNP (GO:0005682)	0.381054	0.999833	5	SNRPD1	SNRPE	SNRPD3	TXNL4A	DCAF4
mitochondrial inner membrane presequence translocase complex (GO:0005744)	0.428834	0.999833	3	DNAJC19	TIMM17A	DNAJC15
cytoplasmic dynein complex (GO:0005868)	0.308935	0.999833	5	DYNC2LI1	SNX4	DCTN4	TPR	DYNLL2
cis-Golgi network (GO:0005801)	0.284057	0.999833	10	RAB30	GOLGA6D	GOSR1	GOLIM4	GOLGA8J	MPPE1	GOLGA8N	TMED5	GOLGA8A	FKTN
telomerase holoenzyme complex (GO:0005697)	0.34488	0.999833	5	HMBOX1	GNL3L	LSM11	SNRPE	SNRPD3
pre-snoRNP complex (GO:0070761)	0.335925	0.999833	2	NOP58	NUFIP1
flotillin complex (GO:0016600)	0.401685	0.999833	2	CBL	CORO1C
ionotropic glutamate receptor complex (GO:0008328)	0.223054	0.999833	9	GRIA2	GRID2	CACNG8	GRIN2A	GRIN3A	DLG2	SHISA9	GRIN2B	SHANK2
gamma-tubulin large complex (GO:0000931)	0.464163	0.999833	2	TUBGCP4	BRCA1
cyclin/CDK positive transcription elongation factor complex (GO:0008024)	0.464163	0.999833	2	CCNT2	CCNT1
PRC1 complex (GO:0035102)	0.379751	0.999833	3	PHC2	CBX4	RNF2
prespliceosome (GO:0071010)	0.381054	0.999833	5	SNRPD1	PRPF40A	SNRPD3	SF3B1	UHMK1
filopodium (GO:0030175)	0.219787	0.999833	13	ITGB1	NLGN1	VCAM1	CXADR	MYO10	ITGB3	RDX	IQGAP2	ANTXR1	ABI2	ITGAV	CD302	FGF13
axon (GO:0030424)	0.210046	0.999833	28	APP	CNTF	KCNC2	SYAP1	ADAM22	PSEN1	KIF1C	VSTM5	TGFB2	SEMA6A	MME	KCNB1	BDNF	INSR	COBL	CCSAP	UHMK1	DNM3	SLC5A7	NFIB	NF1	ROR1	CNTN4	ROR2	FGF13	SCN2A	RAB5A	LLGL1
core mediator complex (GO:0070847)	0.464163	0.999833	2	MED4	MED6
IkappaB kinase complex (GO:0008385)	0.329794	0.999833	3	PRDX3	IFIT5	MAP3K7
smooth endoplasmic reticulum (GO:0005790)	0.428834	0.999833	3	SLMAP	SYVN1	PSEN1
clathrin adaptor complex (GO:0030131)	0.361117	0.999833	4	SGIP1	TBC1D5	AP2B1	EGFR
main axon (GO:0044304)	0.34672	0.999833	7	CRHBP	DLG2	KCNQ3	NRCAM	ANK3	SCN2A	ERMN
nuclear origin of replication recognition complex (GO:0005664)	0.464163	0.999833	2	ORC6	ORC2
lysosomal membrane (GO:0005765)	0.203173	0.999833	54	SCARB2	ATP8A1	SPPL2A	LPCAT1	WDR41	MFSD8	RAB44	GLIPR1	ENPP1	CPNE3	RNF152	RAB2A	NSF	STARD3NL	NFAM1	STX7	SLC11A2	ATP11B	AP3B1	CYB561A3	EEF1A1	RAB37	TMEM106B	TLR8	PHIP	TLR3	SLC29A3	PI4K2A	HLA-DQB1	GNAI3	PRCP	PSEN1	PLD1	GNAI1	TMEM165	SLC38A9	ATP6V1C1	ATP6V1C2	VTI1B	TMEM30A	WDR59	ABCA5	SURF4	CMTM6	TMEM192	DNAJC13
microvillus membrane (GO:0031528)	0.464163	0.999833	2	ITGB3	ITGAV
ribonucleoprotein granule (GO:0035770)	0.28493	0.999833	16	BARD1	TIA1	FASTKD2	ROCK2	TUBB	LIG4	HOXD10	UHMK1	EID1	AGO3	SARNP	PABPC1	GRSF1	EIF4E	RPL28	DCP2
exocytic vesicle (GO:0070382)	0.319645	0.999833	4	RAB10	DPYSL3	RAB27A	RAB6A
junctional sarcoplasmic reticulum membrane (GO:0014701)	0.522595	0.999833	2	AKAP6	TRDN
Sin3-type complex (GO:0070822)	0.319645	0.999833	4	HDAC2	RBBP4	SIN3B	BRMS1L
DNA-directed RNA polymerase I complex (GO:0005736)	0.428834	0.999833	3	POLR1B	TWISTNB	POLR2F
apical dendrite (GO:0097440)	0.464163	0.999833	2	CPEB3	CLU
Golgi-associated vesicle (GO:0005798)	0.285926	0.999833	12	LMAN1	CHIC2	TICAM2	LMAN2L	TMED7-TICAM2	TMED3	TMED2	RAB27B	IER3IP1	STEAP2	TMED5	F5
histone methyltransferase complex (GO:0035097)	0.331011	0.999833	10	HDAC2	PAXIP1	CBX5	RBBP4	AEBP2	KMT2A	MTF2	TRIM37	ASH2L	PRDM10
Golgi stack (GO:0005795)	0.362772	0.999833	6	NSF	RAB30	TMBIM4	GCNT1	RAB27B	SORL1
endolysosome membrane (GO:0036020)	0.476439	0.999833	3	TLR8	AP2B1	TLR3
pseudopodium (GO:0031143)	0.522595	0.999833	2	ACTN1	CAPN2
filopodium membrane (GO:0031527)	0.379751	0.999833	3	ITGB3	ITGAV	ANTXR1
cation channel complex (GO:0034703)	0.316274	0.999833	13	GRIA2	TRPC4	AKAP6	SHISA9	GRIN2B	CACNG8	GRIN2A	GRIN3A	SESTD1	CALM3	CALM1	SCN2A	MCU
trans-Golgi network (GO:0005802)	0.265239	0.999833	34	APP	SCOC	ATP8A1	GCNT1	AP4E1	ARL1	RHOBTB3	ATP2C1	BICD1	TMEM165	CNST	VPS53	GOLGA1	MYO18A	RAB6A	ATP9B	CLASP2	ARFGEF1	RBFOX1	PIFO	SCAMP1	SORL1	DOPEY1	RAB10	2019-03-01	RAB30	HLA-DPB1	RAB38	PRKD1	TBC1D23	LGR5	OPTN	LLGL1	PI4K2A	HLA-DQB1
HAUS complex (GO:0070652)	0.464163	0.999833	2	HAUS3	HAUS2
coated vesicle (GO:0030135)	0.324666	0.999833	14	TICAM2	LMAN2L	SGIP1	TMED7-TICAM2	SCAMP1	IER3IP1	F5	EPN3	LMAN1	SNX18	AAK1	TMED3	TMED2	TMED5
endolysosome (GO:0036019)	0.483281	0.999833	4	TLR8	AP2B1	CTSS	TLR3
early endosome (GO:0005769)	0.239584	0.999833	41	SAMD9L	PARM1	VPS4A	CXCR4	CLCN3	RAB22A	EGFR	LRP6	PRDX3	RABGEF1	SNX4	NEURL1B	SNX27	DNER	MAPK1	B2M	EPHB1	SH3GL2	SNX6	VTI1B	APPL1	USP8	RABGAP1L	RAB4A	VCAM1	FZD5	MMGT1	STX7	F2R	SLC11A2	DNAJC13	LNPEP	HLA-A	SORL1	2019-03-01	PIKFYVE	RAB38	WDFY2	STEAP2	RAB5A	NOX1	LLGL1
chromatin (GO:0000785)	0.243496	0.999833	55	AHCTF1	JMJD1C	NUCKS1	AFF4	LOXL2	MECP2	YY1	NIPBL	CHAF1B	SIN3B	TRPS1	MYC	CHEK1	SMARCAD1	OIP5	JUNB	GABPA	TP63	MEF2A	NCOA1	TTC37	SMARCC1	ESCO1	H2AFV	PAX6	ESCO2	RUNX2	SFPQ	RBL1	MAF	ZFP42	SMCR8	ASF1A	ANKRD17	HDAC2	PDS5A	RBBP4	NRIP1	ORC2	MCMBP	SMARCE1	SMAD2	UBE2A	ESR1	SMARCA2	PHOX2B
endocytic patch (GO:0061645)	0.401685	0.999833	2	WIPF1	WIPF2
aggresome (GO:0016235)	0.414807	0.999833	8	KLF8	TBK1	SLFN11	UBD	UBQLN1	TRIM37	URB2	PSEN1
nuclear matrix (GO:0016363)	0.306876	0.999833	12	TENM1	CENPF	SFPQ	SCAF8	STAG2	ATXN1	NUFIP1	RAD21	SMARCAD1	PRPF40A	ZNF326	RUNX1T1
Sin3 complex (GO:0016580)	0.428834	0.999833	3	HDAC2	RBBP4	SIN3B
phagocytic vesicle (GO:0045335)	0.339087	0.999833	16	RAB39A	ANXA11	CYBB	HLA-A	CLCN3	RAB22A	TAPBP	RAB23	ITGAV	RAB38	PIK3C3	CD36	SRGAP2	B2M	LTF	ATG5
cytoplasmic vesicle (GO:0031410)	0.283461	0.999833	40	RAB3B	RGS17	CHIC2	NRSN1	TFRC	GOLIM4	LPAR1	RHOBTB3	CXCR4	PLD1	FNBP1L	CLCN3	RND2	RND3	BICD1	BICD2	LRP6	TMEM123	RAB6A	CD164	SLC30A9	SLC30A8	DST	BDNF	CAV2	STX7	SLC11A2	TIRAP	MTSS1	DNM3	SNX18	ANP32E	RAPGEF2	SGK3	AMOTL1	HAP1	RHCG	RAB5A	OPTN	PI4K2A
endoplasmic reticulum quality control compartment (GO:0044322)	0.522595	0.999833	2	SYVN1	DZIP3
intrinsic component of the cytoplasmic side of the plasma membrane (GO:0031235)	0.522102	0.999833	3	RASA4	NF1	RASAL2
integral component of Golgi membrane (GO:0030173)	0.387204	0.999833	8	SLC35B3	SLC35B4	SAMD8	ACER3	SGMS2	CASD1	IER3IP1	STEAP2
platelet alpha granule lumen (GO:0031093)	0.357581	0.999833	13	FAM49B	APP	TGFB2	APOOL	ACTN1	FGG	PDGFB	PLG	PPBP	CLU	F5	NHLRC2	VTI1B
U2-type spliceosomal complex (GO:0005684)	0.328204	0.999833	12	PPIL1	SNRPD1	CDC5L	SNRPE	PRPF40A	SNRPB2	PLRG1	SNRPD3	SF3B1	BCAS2	UHMK1	RBM22
histone acetyltransferase complex (GO:0000123)	0.559318	0.999833	4	PHF20	MSL3	ELP2	ELP4
mitochondrial large ribosomal subunit (GO:0005762)	0.403659	0.999833	10	MRPL3	MRPL42	MRPL2	NSUN3	MRPL19	MRPL17	MPV17L2	MRPL48	MRPL34	MRPL13
SWI/SNF complex (GO:0016514)	0.522102	0.999833	3	SMARCE1	SMARCC1	SMARCA2
endoplasmic reticulum subcompartment (GO:0098827)	0.476439	0.999833	3	RAB10	ATL3	KPNB1
mitotic spindle (GO:0072686)	0.357644	0.999833	16	MAP10	CKAP2L	RCC2	HAUS3	KIF11	PKD2	CCSAP	PKHD1	AGBL5	TBCK	STAG2	TPR	MAPK1	ALPK3	RAE1	CLASP2
myosin filament (GO:0032982)	0.522595	0.999833	2	TRIM32	MYH10
signal recognition particle, endoplasmic reticulum targeting (GO:0005786)	0.670025	0.999833	1	SRP19
endosomal part (GO:0044440)	0.459821	0.999833	6	USP8	APP	AP4E1	PRLR	EGFR	SNX6
axonal growth cone (GO:0044295)	0.625923	0.999833	2	FLRT3	COBL
integral component of lumenal side of endoplasmic reticulum membrane (GO:0071556)	0.395269	0.999833	6	SPPL2A	HLA-DPB1	HLA-A	PKD2	TAPBP	HLA-DQB1
spliceosomal complex (GO:0005681)	0.382235	0.999833	21	IVNS1ABP	PRPF38A	SF3B3	HNRNPR	PLRG1	ZCRB1	RNPC3	WBP11	DCAF4	SMU1	SNRPD1	TRA2B	SNRPE	SNRPB2	ZNF326	SNRPD3	HNRNPA1	TXNL4A	SF3B1	SLU7	BCAS2
cytoplasmic vesicle membrane (GO:0030659)	0.452428	0.999833	10	RAB10	TRIM72	RAB4A	C2CD5	IYD	SPIRE1	LNPEP	RAB11FIP2	YWHAZ	YWHAG
mitochondrial matrix (GO:0005759)	0.353007	0.999833	55	DMGDH	ISCA2	GFM1	ACSM2A	NR3C1	ALKBH7	ACSM2B	GLS	NADK2	AUH	ACP6	DBT	PDK3	HMGCS2	AASS	PDK1	PDHX	GSTK1	NSUN3	BCKDHB	DARS2	SIRT5	CLPX	ALDH5A1	MTHFD2	PDE12	MTHFD2L	FDX1	TFAM	SUCLG2	NDUFS1	DNA2	ALDH7A1	FECH	ATP5A1	AK4	PDHB	FOXO3	PRDX3	NFS1	OXCT1	CBR4	TRMT10C	UQCC2	GSR	SOD2
clathrin-sculpted gamma-aminobutyric acid transport vesicle (GO:0061200)	0.464163	0.999833	2	GAD1	GAD2
cell cortex region (GO:0099738)	0.625923	0.999833	2	ANLN	GNAI1
condensed chromosome kinetochore (GO:0000777)	0.443334	0.999833	4	DSN1	AHCTF1	NUF2	BIRC5
condensed nuclear chromosome kinetochore (GO:0000778)	0.625923	0.999833	2	DSN1	NUF2
THO complex part of transcription export complex (GO:0000445)	0.725709	0.999833	1	THOC2
gamma-tubulin ring complex (GO:0008274)	0.464163	0.999833	2	TUBGCP4	BRCA1
primary lysosome (GO:0005766)	0.576568	0.999833	2	STX7	ANXA11
autophagosome membrane (GO:0000421)	0.644585	0.999833	3	SH3GLB1	ULK1	PRKD1
CHD-type complex (GO:0090545)	0.565486	0.999833	3	HDAC2	RBBP4	APPL1
pre-autophagosomal structure (GO:0000407)	0.594971	0.999833	4	ULK2	ULK1	PIK3C3	WIPI2
CatSper complex (GO:0036128)	0.576568	0.999833	2	CATSPER2	HSPA2
endoplasmic reticulum tubular network (GO:0071782)	0.606359	0.999833	3	RAB10	ATL3	KPNB1
Cul3-RING ubiquitin ligase complex (GO:0031463)	0.420869	0.999833	13	KLHL18	KLHL15	KLHL4	KLHL24	BACH1	KLHL9	KBTBD3	KLHL5	GAN	KLHL8	SPOP	SPOPL	KBTBD7
cytosolic proteasome complex (GO:0031597)	0.522595	0.999833	2	PSMC4	PSMD1
integral component of peroxisomal membrane (GO:0005779)	0.476439	0.999833	3	PEX3	PEX2	PEX13
endocytic vesicle (GO:0030139)	0.378024	0.999833	20	STX7	GOLIM4	LPAR1	RAB39A	ANXA11	AP2B1	PLD1	CLCN3	RAB22A	TIRAP	MTSS1	HSP90B1	RAB23	DLC1	RAPGEF2	ITGAV	RAB38	CD36	SRGAP2	RAB5A
mitochondrial outer membrane (GO:0005741)	0.398584	0.999833	20	CYB5B	MOAP1	BNIP3L	MAOA	BNIP3	VPS13C	CISD2	MFF	FOXO3	2019-03-05	HADHB	BCL2L11	RHOT1	MSTO1	PPP2R2B	BCL2	MFN2	ULK1	RTN4IP1	LPIN1	SLC25A46
actin filament (GO:0005884)	0.476636	0.999833	10	WIPF1	TPM3	WIPF2	ACTN1	GAS2	PAWR	COBL	TSC1	TEK	LMOD2
secretory vesicle (GO:0099503)	0.565486	0.999833	3	RAB10	DPYSL3	RAB27A
nuclear inclusion body (GO:0042405)	0.625923	0.999833	2	ATXN1	TPR
secondary lysosome (GO:0005767)	0.710989	0.999833	2	CRHBP	PIK3C3
MICOS complex (GO:0061617)	0.725709	0.999833	1	APOOL
lateral element (GO:0000800)	0.576568	0.999833	2	MEI4	BRCA1
AMPA glutamate receptor complex (GO:0032281)	0.644585	0.999833	3	GRIA2	CACNG8	SHISA9
azurophil granule lumen (GO:0035578)	0.471122	0.999833	16	NHLRC3	TUBB	GDI2	PA2G4	GNS	HRNR	PLAC8	DNAJC3	HEBP2	DSN1	TTR	GM2A	PSMD1	MAPK1	FRK	ARSB
spectrin-associated cytoskeleton (GO:0014731)	0.810477	0.999833	1	ANK3
clathrin coat (GO:0030118)	0.725709	0.999833	1	KCNQ5
DNA-directed RNA polymerase complex (GO:0000428)	0.565486	0.999833	3	TWISTNB	POLR2F	POLR3K
L-type voltage-gated calcium channel complex (GO:1990454)	0.771998	0.999833	1	CACNB2
nuclear chromosome part (GO:0044454)	0.377338	0.999833	69	MEI4	NUCKS1	BRCA1	PPP1CB	YY1	PPP1CC	NIPBL	CHAF1B	TRPS1	MYC	NUF2	SMARCAD1	JUNB	GABPA	TP63	MEF2A	NCOA1	WDHD1	SMARCC1	ATRX	LIG4	H2AFV	PAX6	THOC2	ACTR8	UCHL5	RUNX2	MMS22L	ZFP42	C14ORF39	MCM4	MCM6	DNA2	LRIF1	ASF1A	HDAC2	NUFIP1	NUGGC	PURA	DSN1	HMBOX1	ORC6	RBBP4	TNKS2	RAD21	NRIP1
Swr1 complex (GO:0000812)	0.842464	0.999833	1	ANP32E
extrinsic component of external side of plasma membrane (GO:0031232)	0.771998	0.999833	1	PLG
membrane attack complex (GO:0005579)	0.725709	0.999833	1	C8A
Golgi cisterna membrane (GO:0032580)	0.745206	0.999833	4	GOLGA6D	GOLGA8J	GOLGA8N	GOLGA8A
PML body (GO:0016605)	0.502257	0.999833	11	ZMYM2	CBX5	SATB1	KAT6A	ATRX	NSMCE2	RPA1	TOPBP1	N4BP1	PIAS2	PIAS1
G-protein coupled receptor dimeric complex (GO:0038037)	0.464163	0.999833	2	CALCRL	GRM1
bicellular tight junction (GO:0005923)	0.463212	0.999833	13	CXADR	ANK3	CLDN1	YBX3	MTDH	TJP1	RAP2B	APC	CLDN12	WNK3	RAPGEF2	STRN	AMOTL1
chromatin silencing complex (GO:0005677)	0.810477	0.999833	1	RRP8
nuclear proteasome complex (GO:0031595)	0.810477	0.999833	1	PSMC4
ISWI-type complex (GO:0031010)	0.625923	0.999833	2	CECR2	RBBP4
nuclear chromosome (GO:0000228)	0.403659	0.999833	10	SMARCE1	TOP2A	PBRM1	NIPBL	FIGNL1	CHEK1	HMGA2	BIRC5	HDAC8	LRPPRC
integral component of mitochondrial outer membrane (GO:0031307)	0.743042	0.999833	3	FUNDC2	RHOT1	BNIP3
nuclear heterochromatin (GO:0005720)	0.712903	0.999833	3	CBX5	ATRX	IKZF1
U2-type prespliceosome (GO:0071004)	0.644585	0.999833	3	PRPF40A	SF3B1	UHMK1
outer dynein arm (GO:0036157)	0.842464	0.999833	1	DNAL1
sodium channel complex (GO:0034706)	0.869054	0.999833	1	SCN2A
phagocytic vesicle membrane (GO:0030670)	0.66362	0.999833	6	CYBB	PIK3C3	HLA-A	B2M	ATG5	TAPBP
COPI-coated vesicle (GO:0030137)	0.810477	0.999833	1	TMED2
Ino80 complex (GO:0031011)	0.522102	0.999833	3	YY1	ACTR8	UCHL5
BLOC-1 complex (GO:0031083)	0.80771	0.999833	2	BLOC1S2	PI4K2A
MLL3/4 complex (GO:0044666)	0.625923	0.999833	2	PAXIP1	ASH2L
perinuclear endoplasmic reticulum (GO:0097038)	0.464163	0.999833	2	OSBPL3	CAPN2
integral component of nuclear inner membrane (GO:0005639)	0.909529	0.999833	1	P2RX7
intermediate filament (GO:0005882)	0.999833	0.999833	1	SHANK2
cytosolic small ribosomal subunit (GO:0022627)	0.998927	0.999833	2	LARP4	RPS24
small ribosomal subunit (GO:0015935)	0.996737	0.999833	3	MRPS14	LARP4	RPS24
site of double-strand break (GO:0035861)	0.998455	0.999833	1	SMARCAD1
cytosolic ribosome (GO:0022626)	0.996821	0.999833	11	NUFIP1	RPL36A-HNRNPH2	RPL37A	SURF6	RPL35A	LARP4	RPL9	RPL28	RPS24	RPL3L	RPL7
site of DNA damage (GO:0090734)	0.992262	0.999833	2	PAPD7	SMARCAD1
mitochondrial respiratory chain complex IV (GO:0005751)	0.964111	0.999833	1	C15ORF48
mitochondrial small ribosomal subunit (GO:0005763)	0.719027	0.999833	4	MRPL42	MRPS14	MRPS22	MRPS21
nuclear replisome (GO:0043601)	0.95682	0.999833	1	NUGGC
anaphase-promoting complex (GO:0005680)	0.982874	0.999833	1	ANAPC1
polysomal ribosome (GO:0042788)	0.967661	0.999833	2	NUFIP2	ZC3H15
anchored component of external side of plasma membrane (GO:0031362)	0.855031	0.999833	2	PKHD1	PRND
mitochondrial respiratory chain complex I (GO:0005747)	0.99559	0.999833	3	NDUFB5	NDUFAB1	NDUFS1
mitochondrial respiratory chain complex III (GO:0005750)	0.937497	0.999833	1	PMPCB
platelet dense granule membrane (GO:0031088)	0.725709	0.999833	1	RAB27B
microvillus (GO:0005902)	0.604419	0.999833	7	VCAM1	ANGPT1	ITGB3	RDX	ITGAV	TEK	CD44
intermediate filament cytoskeleton (GO:0045111)	0.988127	0.999833	6	PSMD10	SESTD1	MRPS23	DISC1	PHLDB2	SMARCA2
ficolin-1-rich granule membrane (GO:0101003)	0.614567	0.999833	10	SERPINB10	CLEC4C	PTPRN2	SIGLEC14	CD93	DSG1	SLC2A3	PRCP	FPR2	CD58
sarcoplasmic reticulum (GO:0016529)	0.587434	0.999833	5	ATP2A2	AKAP6	ANK3	THBS4	TRDN
preribosome (GO:0030684)	0.980617	0.999833	7	NOP58	UTP6	WDR36	WDR37	MAK16	DIEXF	UTP14C
cytosolic part (GO:0044445)	0.990303	0.999833	17	NUFIP1	RPL36A-HNRNPH2	IFIT5	RPL35A	AHR	LARP4	RPL9	RPL3L	RPL7	PRDX3	FYCO1	PSMC4	RPL37A	SURF6	MAP3K7	RPL28	RPS24
multivesicular body (GO:0005771)	0.902286	0.999833	3	CRHBP	RAB27A	RAB27B
autolysosome (GO:0044754)	0.810477	0.999833	1	PIK3C3
microbody lumen (GO:0031907)	0.94699	0.999833	4	AMACR	ACOX1	IDH1	IDE
multimeric ribonuclease P complex (GO:0030681)	0.869054	0.999833	1	RPP14
vacuolar proton-transporting V-type ATPase complex (GO:0016471)	0.80771	0.999833	2	ATP6V1C1	ATP6V1C2
chromatoid body (GO:0033391)	0.810477	0.999833	1	PIWIL2
U4/U6 x U5 tri-snRNP complex (GO:0046540)	0.838999	0.999833	3	SART3	SNRPE	TXNL4A
axonemal dynein complex (GO:0005858)	0.95682	0.999833	1	DNAL1
gamma-secretase complex (GO:0070765)	0.725709	0.999833	1	PSEN1
platelet dense granule (GO:0042827)	0.982874	0.999833	1	RAB27B
microtubule cytoskeleton (GO:0015630)	0.98836	0.999833	50	C2CD5	KIF14	KIF11	CRHBP	KIF5C	KIF5B	TCP11L1	KIF1C	PRKCI	DST	TUBB	ANXA11	HAUS3	GTF2F2	CCSAP	DNM3	THAP6	TUBB2B	KATNAL1	KATNAL2	SPECC1L	PHIP	LRIF1	ZNF397	PXK	TUBAL3	NEDD9	SLAIN2	CCNB2	TAF1D	KIF3A	TAF1A	KRIT1	MAP7	TPPP	MARK1	CLASP2	KLHL4	WDR13	LRPPRC	AGBL5	NUDT21	CENPF	FER	APC	KIF26B
microtubule plus-end (GO:0035371)	0.476439	0.999833	3	DST	NCKAP5L	SLAIN2
anchored component of plasma membrane (GO:0046658)	0.932395	0.999833	4	PKHD1	CD160	RGMB	PRND
polysome (GO:0005844)	0.969836	0.999833	6	IMPACT	NUFIP2	AGO1	LARP4	MYH10	ZC3H15
Golgi lumen (GO:0005796)	0.958611	0.999833	11	APP	VCAN	SDC2	GOLIM4	PDGFB	KERA	GPC5	GPC4	F2	GPC6	RAB33B
small nucleolar ribonucleoprotein complex (GO:0005732)	0.909529	0.999833	1	NOP58
condensed nuclear chromosome, centromeric region (GO:0000780)	0.909529	0.999833	1	NUF2
cell cortex part (GO:0044448)	0.958642	0.999833	4	ANLN	TRPC4	GNAI1	SPTBN2
spindle midzone (GO:0051233)	0.914113	0.999833	3	MAP10	RCC2	KIF14
MHC protein complex (GO:0042611)	0.644585	0.999833	3	HLA-DPB1	HLA-A	HLA-DQB1
extrinsic component of endosome membrane (GO:0031313)	0.771998	0.999833	1	USP8
very-low-density lipoprotein particle (GO:0034361)	0.948049	0.999833	1	PCYOX1
recycling endosome membrane (GO:0055038)	0.721908	0.999833	7	EHD4	RAP2B	HLA-A	SCAMP1	B2M	OPTN	VTI1B
cytoplasmic vesicle lumen (GO:0060205)	0.964902	0.999833	15	PCSK1	APAF1	IDH1	AGL	GDI2	GCG	HMGB1	MAPK14	HSP90B1	EEF1A1	CAND1	DLC1	PPIA	PAFAH1B2	VCL
condensed nuclear chromosome (GO:0000794)	0.949462	0.999833	3	RAD21	CHEK1	LRPPRC
microtubule (GO:0005874)	0.957609	0.999833	27	MAP10	TUBAL3	KIF14	KIF11	BICD1	DYNC2LI1	CRHBP	SERP1	KIF5C	KIF3A	KIF5B	TCP11L1	KRIT1	KIF1C	TPPP	CLASP2	TUBB	LRPPRC	TUBB2B	KATNAL1	APC	TBL1XR1	KATNAL2	KIF26B	CALM3	FGF13	CALM1
chromosomal region (GO:0098687)	0.546178	0.999833	13	HELLS	MBD5	RCC2	NSMCE2	PDS5A	CENPF	STAG2	FAM172A	RAD21	NUF2	CHEK1	BIRC5	OIP5
clathrin-coated endocytic vesicle (GO:0045334)	0.647033	0.999833	8	FZD5	TYRP1	HLA-DPB1	CD9	AP2B1	ROR2	SH3GL2	HLA-DQB1
NLRP3 inflammasome complex (GO:0072559)	0.869054	0.999833	1	DHX33
lytic vacuole membrane (GO:0098852)	0.490725	0.999833	39	SCARB2	SPPL2A	GNAI3	WDR41	PSEN1	PLD1	GNAI1	TMEM165	MFSD8	ENPP1	SLC38A9	RNF152	ATP6V1C1	ATP6V1C2	VTI1B	RAB2A	NSF	WDR59	ABCA5	STARD3NL	STX7	SLC11A2	TMEM192	DNAJC13	AP3B1	LNPEP	CYB561A3	GDAP2	2019-03-01	CLCN5	OSTM1	GNAQ	GNB4	HLA-DPB1	TMEM106B	PHIP	TLR3	SLC29A3	PI4K2A	HLA-DQB1
sarcoplasm (GO:0016528)	0.647476	0.999833	5	ATP2A2	AKAP6	ANK3	THBS4	TRDN
potassium channel complex (GO:0034705)	0.937497	0.999833	1	ABCC9
nuclear ubiquitin ligase complex (GO:0000152)	0.734382	0.999833	6	BARD1	PHC2	CBX4	BRCA1	RNF2	ANAPC1
endoplasmic reticulum exit site (GO:0070971)	0.818443	0.999833	3	CTAGE5	MPPE1	TMED5
mitochondrial inner membrane (GO:0005743)	0.975554	0.999833	45	COX15	MRPS14	NDUFB5	MRPL19	ATP5A1	MRPL17	MPV17L2	OMA1	PSEN1	MRPS30	MRPL34	HIGD1A	ATP5G1	MRPL13	MT-ATP6	SLC25A26	MRPL3	MRPL42	MRPL2	AIFM1	TIMM17A	PMPCB	DNAJC19	MRPS25	UQCC2	MRPS22	UQCC1	MRPS23	MRPS21	MRPL48	SOD2	CLPX	MT-ATP8	COX6B1	SLC9B2	SLC25A16	HADHB	NDUFAB1	YME1L1	MICU3	L2HGDH	SLC25A12	SLC25A4	MCU	COX20
P granule (GO:0043186)	0.95682	0.999833	1	PIWIL2
preribosome, large subunit precursor (GO:0030687)	0.955943	0.999833	2	WDR37	MAK16
synaptonemal complex (GO:0000795)	0.889005	0.999833	3	MEI4	C14ORF39	BRCA1
RNA polymerase III transcription factor complex (GO:0090576)	0.810477	0.999833	1	BDP1
acetylcholine-gated channel complex (GO:0005892)	0.964111	0.999833	1	STXBP5
lipid droplet (GO:0005811)	0.938079	0.999833	7	SET	RDH10	TRAF6	ALOX15	LPCAT1	TSC1	METTL7A
NURF complex (GO:0016589)	0.771998	0.999833	1	RBBP4
nuclear inner membrane (GO:0005637)	0.948652	0.999833	2	ATP1B4	ATP11B
autophagosome (GO:0005776)	0.676188	0.999833	10	SH3GLB1	FYCO1	TBC1D5	RAB23	UBQLN1	ULK1	PIK3C3	WIPI2	PRKD1	ATG5
centriolar satellite (GO:0034451)	0.948652	0.999833	2	CCDC14	SSX2IP
lysosomal lumen (GO:0043202)	0.507591	0.999833	15	SCARB2	ASAH1	SDC2	KERA	GNS	LIPA	CTSS	VCAN	GM2A	MAN2B2	IDS	GPC5	GPC4	GPC6	ARSB
COPI-coated vesicle membrane (GO:0030663)	0.80771	0.999833	2	TMED3	C3ORF58
COPII vesicle coat (GO:0030127)	0.924802	0.999833	1	SEC24A
MLL1/2 complex (GO:0044665)	0.874129	0.999833	3	KMT2A	PHF20	RNF2
ER to Golgi transport vesicle membrane (GO:0012507)	0.452428	0.999833	10	LMAN1	MCFD2	SEC24A	CNIH1	HLA-DPB1	TMED2	HLA-A	B2M	VTI1B	HLA-DQB1
INO80-type complex (GO:0097346)	0.559318	0.999833	4	YY1	ANP32E	ACTR8	UCHL5
vesicle coat (GO:0030120)	0.924622	0.999833	3	SEC24A	TMED3	C3ORF58
trans-Golgi network transport vesicle (GO:0030140)	0.779213	0.999833	2	RAB27B	STEAP2
rough endoplasmic reticulum (GO:0005791)	0.555407	0.999833	5	TRAM1	FKRP	TMCC1	PSEN1	SEC62
microtubule end (GO:1990752)	0.770601	0.999833	3	DST	NCKAP5L	SLAIN2
germ plasm (GO:0060293)	0.924802	0.999833	1	PIWIL2
spindle (GO:0005819)	0.720324	0.999833	29	VPS4A	KIF14	NEDD9	KIF11	PKD2	PKHD1	DSN1	KIF3A	TPR	POC1B	MAPK1	KNTC1	CLASP2	CKAP2L	ANXA11	HAUS3	HSPA2	CCSAP	AGBL5	TBCK	NEDD1	CENPF	KATNAL1	TBL1XR1	KATNAL2	ALPK3	CALM3	CALM1	CEP44
P-body (GO:0000932)	0.63136	0.999833	11	ZFP36	CNOT7	TRIM5	POLR2D	SAMD4A	RC3H1	EIF4E	AICDA	TNRC6A	DCP2	PNRC2
large ribosomal subunit (GO:0015934)	0.887596	0.999833	9	RPL36A-HNRNPH2	RPL37A	SURF6	MRPL17	RPL35A	RPL9	RPL28	RPL3L	RPL7
SCF ubiquitin ligase complex (GO:0019005)	0.84233	0.999833	7	ABTB2	SPOP	SPOPL	KLHL11	FBXO45	FBXO32	BTRC
spanning component of membrane (GO:0089717)	0.625923	0.999833	2	NLGN1	NLGN2
peroxisomal matrix (GO:0005782)	0.94699	0.999833	4	AMACR	ACOX1	IDH1	IDE
chromosome, telomeric region (GO:0000781)	0.803144	0.999833	18	CBX5	ATRX	NSMCE2	RPA1	LIG4	THOC2	PPP1CB	PPP1CC	PURA	HMBOX1	TNKS2	CHEK1	ORC2	MCM4	NABP1	MCM6	DNA2	LRIF1
polymeric cytoskeletal fiber (GO:0099513)	0.927396	0.999833	30	TUBAL3	WIPF1	WIPF2	KIF14	KIF11	LMOD2	CRHBP	KIF5C	KIF3A	KIF5B	TCP11L1	KRIT1	KIF1C	TPPP	CLASP2	TPM3	TUBB	ACTN1	PAWR	COBL	TSC1	LRPPRC	TUBB2B	KATNAL1	APC	KATNAL2	KIF26B	GAS2	TEK	FGF13
intrinsic component of mitochondrial outer membrane (GO:0031306)	0.559318	0.999833	4	FUNDC2	RHOT1	BNIP3	MFN2
NuRD complex (GO:0016581)	0.565486	0.999833	3	HDAC2	RBBP4	APPL1
endocytic vesicle lumen (GO:0071682)	0.644585	0.999833	3	DLC1	LTF	HSP90B1
ficolin-1-rich granule (GO:0101002)	0.624712	0.999833	30	SERPINB10	ASAH1	FGL2	SLC2A3	PRCP	HMGB1	FPR2	GNS	CTSS	CAND1	TIMP2	MAPK1	CD58	ARSB	KCMF1	PTPRN2	SIGLEC14	CD93	APAF1	IDH1	AGL	MAPK14	EEF1A1	CLEC4C	QPCT	DSG1	PPIA	PAFAH1B2	KPNB1	VCL
Set1C/COMPASS complex (GO:0048188)	0.924802	0.999833	1	ASH2L
N-terminal protein acetyltransferase complex (GO:0031414)	0.869054	0.999833	1	NAA50
condensed chromosome (GO:0000793)	0.932395	0.999833	4	CHEK1	LIG4	HMGB1	LRPPRC
Cul4A-RING E3 ubiquitin ligase complex (GO:0031464)	0.924802	0.999833	1	CUL4A
late endosome membrane (GO:0031902)	0.447786	0.999833	8	SCARB2	2019-03-01	PIKFYVE	STARD3NL	SLC11A2	RAB27A	RAB27B	CYB561A3	VTI1B
unconventional myosin complex (GO:0016461)	0.464163	0.999833	2	MYO9A	DYNLL2
striated muscle thin filament (GO:0005865)	0.874468	0.999833	2	MYBPC1	LMOD2
vacuole (GO:0005773)	0.855614	0.999833	8	FYCO1	TBC1D5	RAB23	SLC11A2	UBQLN1	ULK1	WIPI2	ATG5
euchromatin (GO:0000791)	0.906318	0.999833	2	CREB1	ALKBH1
microtubule organizing center part (GO:0044450)	0.823861	0.999833	18	TOP2A	CEP350	CCDC14	CETN3	CEP120	SCLT1	CCSAP	TTBK2	AGBL4	NEDD1	TNKS2	KIF3A	KIAA0586	SASS6	NEK1	POC1B	CEP170	SSX2IP
chaperonin-containing T-complex (GO:0005832)	0.924802	0.999833	1	FYCO1
Golgi cis cisterna (GO:0000137)	0.555407	0.999833	5	GOLGA6D	GOLGA8J	GOLGA8N	LLGL1	GOLGA8A
mitochondrial envelope (GO:0005740)	0.921989	0.999833	8	HADHB	COA4	NLN	AIFM1	UQCC2	SIRT5	NDUFS1	FBXL4
nuclear chromosome, telomeric region (GO:0000784)	0.753635	0.999833	16	CBX5	ATRX	RPA1	LIG4	THOC2	PPP1CB	PPP1CC	PURA	HMBOX1	TNKS2	ORC2	MCM4	NABP1	MCM6	DNA2	LRIF1
transcription factor TFIID complex (GO:0005669)	0.749803	0.999833	5	GTF2A1	GTF2A2	TAF4B	TAF3	GTF2H5
secretory granule lumen (GO:0034774)	0.779485	0.999833	49	PCSK1	FAM49B	APP	GDI2	HMGB1	CLU	HEBP2	GM2A	TIMP2	PSMD1	B2M	NHLRC3	APAF1	TUBB	ACTN1	FGG	F5	EEF1A1	DNAJC3	NHLRC2	PPIA	PAFAH1B2	KPNB1	VCL	LTF	PDGFB	PLG	GNS	PLAC8	DSN1	CAND1	TTR	MAPK1	ARSB	VTI1B	TGFB2	APOOL	IDH1	AGL	RAB27A	GCG	PPBP	PA2G4	MAPK14	HRNR	ERP44
recycling endosome (GO:0055037)	0.744032	0.999833	18	MCTP1	USP6	TFRC	STX7	SLC11A2	ATP11B	HLA-A	SCAMP1	SORL1	RAB10	EHD4	RAP2B	VPS53	ULK1	TUBGCP4	B2M	OPTN	VTI1B
lysosome (GO:0005764)	0.53947	0.999833	70	SCARB2	SPPL2A	WDR41	RNF19B	LIPA	CTSS	MFSD8	FYCO1	CRHBP	CTSO	STS	GM2A	IDS	ENPP1	RNF152	RAB2A	NSF	USP6	STARD3NL	STX7	SLC11A2	PRSS16	KERA	AP3B1	CYB561A3	VCAN	RRAGD	TMEM106B	RAB38	PHIP	TLR3	SLC29A3	PI4K2A	PCYOX1	HLA-DQB1	ASAH1	CALCRL	SDC2	VPS4A	GNAI3	CXCR4	PSEN1	PLD1	GNS	GNAI1	TMEM165
signal recognition particle (GO:0048500)	0.842464	0.999833	1	SRP19
Cajal body (GO:0015030)	0.864529	0.999833	4	COIL	NOP58	SART3	OIP5
pericentriolar material (GO:0000242)	0.565486	0.999833	3	NEDD1	TNKS2	NEK1
MLL1 complex (GO:0071339)	0.874129	0.999833	3	KMT2A	PHF20	RNF2
centriole (GO:0005814)	0.764939	0.999833	14	TOP2A	CEP350	CETN3	CEP120	SCLT1	CCSAP	TTBK2	AGBL4	NEDD1	KIF3A	KIAA0586	SASS6	POC1B	CEP170
spherical high-density lipoprotein particle (GO:0034366)	0.810477	0.999833	1	CLU
late endosome (GO:0005770)	0.426667	0.999833	24	SCARB2	PARM1	VPS4A	SPPL2A	CXCR4	CLCN3	FYCO1	CRHBP	MAPK1	SLC38A9	VTI1B	EXOC8	ABCA5	STARD3NL	STX7	F2R	SLC11A2	TMEM192	RAB27A	CYB561A3	2019-03-01	PIKFYVE	CHMP2B	RAPGEF2	PIK3C3
condensed chromosome, centromeric region (GO:0000779)	0.857511	0.999833	3	DSN1	AHCTF1	BIRC5
juxtaparanode region of axon (GO:0044224)	0.842464	0.999833	1	DLG2
contractile fiber (GO:0043292)	0.487949	0.999833	5	MYBPC1	PPP1R12A	SCO1	MYL1	LMOD2
spindle pole body (GO:0005816)	0.725709	0.999833	1	TUBGCP4
COPI vesicle coat (GO:0030126)	0.779213	0.999833	2	TMED3	C3ORF58
cytosolic large ribosomal subunit (GO:0022625)	0.921989	0.999833	8	RPL36A-HNRNPH2	RPL37A	SURF6	RPL35A	RPL9	RPL28	RPL3L	RPL7
centrosome (GO:0005813)	0.417284	0.999833	80	MAP10	CETN3	CEP120	BICD1	BICD2	MECP2	PPP4R2	CHEK1	NEK1	CEP170	BBS7	PRKACB	BCAS2	ZNF322	LRRCC1	CDKL2	CCDC38	GEN1	MKKS	PPP1R12A	CKAP2L	HAUS3	IFT80	ACTR8	DYNLL2	WDR35	CCSAP	HAUS2	TTI2	KAT2B	RRAGD	TRIM59	ALPK3	SSX2IP	PAFAH1B1	DCTN5	AKNA	DCTN2	ROCK2	DCTN4	VPS4A	CEP85L	GNAI3	SLAIN2	PSEN1	GNAI1
MHC class II protein complex (GO:0042613)	0.747074	0.999833	2	HLA-DPB1	HLA-DQB1
ribosome (GO:0005840)	0.920198	0.999833	9	SERP1	NUFIP1	NUFIP2	EIF2AK2	DENR	RPL9	MRPL13	ZC3H15	RPL3L
Cul4-RING E3 ubiquitin ligase complex (GO:0080008)	0.77159	0.999833	5	CUL4A	DCAF12L2	PLRG1	DCAF10	DCAF4
nuclear euchromatin (GO:0005719)	0.855031	0.999833	2	CREB1	ALKBH1
lytic vacuole (GO:0000323)	0.904991	0.999833	24	CALCRL	VPS4A	CXCR4	LIPA	CTSS	FYCO1	CTSO	SNX2	STS	SLC38A9	RNF152	ARSB	CD164	USP6	ABCA5	STX7	TMEM192	RAB27A	PRSS16	2019-03-01	RRAGD	CHMP2B	TMEM106B	RAB38	PCYOX1
myofibril (GO:0030016)	0.719027	0.999833	4	MYBPC1	SCO1	MYL1	LMOD2
DNA-directed RNA polymerase II, core complex (GO:0005665)	0.606359	0.999833	3	POLR2D	POLR2F	PPARGC1A
small-subunit processome (GO:0032040)	0.749803	0.999833	5	NOP58	UTP6	WDR36	DIEXF	UTP14C
spliceosomal tri-snRNP complex (GO:0097526)	0.647476	0.999833	5	SART3	SNRPD1	SNRPE	SNRPD3	TXNL4A
intrinsic component of external side of plasma membrane (GO:0031233)	0.770601	0.999833	3	PKHD1	CNTN1	PRND
cullin-RING ubiquitin ligase complex (GO:0031461)	0.733647	0.999833	28	KLHL18	KLHL15	DCAF12L2	KLHL11	FBXO45	DCAF4	BACH1	CAND1	SPOP	ZSWIM6	DCAF10	BTRC	ZYG11B	PLRG1	KLHL4	KLHL24	FBXO32	ABTB2	KLHL9	CUL4A	KBTBD3	KLHL5	GAN	KLHL8	SPOPL	ASB4	KBTBD7	ANAPC1
spliceosomal snRNP complex (GO:0097525)	0.702848	0.999833	9	SART3	SNRPD1	SNRPE	PRPF40A	SNRPB2	SNRPD3	TXNL4A	SF3B1	DCAF4
spindle pole (GO:0000922)	0.830682	0.999833	15	MAP10	VPS4A	KIF11	NEDD1	DSN1	CENPF	STAG2	KATNAL1	KATNAL2	POC1B	KNTC1	CALM3	CALM1	RAE1	CEP44
cytoplasmic ribonucleoprotein granule (GO:0036464)	0.600822	0.999833	28	PIWIL2	DYRK3	NUFIP2	ROCK2	HOXD10	ZFP36	TRIM5	POLR2D	IGF2BP1	EIF4E	BARD1	TIA1	TUBB	SAMD4A	RC3H1	LIG4	LARP4	AICDA	PNRC2	PUM2	EID1	CNOT7	AGO3	SARNP	PABPC1	RPL28	TNRC6A	DCP2
tertiary granule lumen (GO:1904724)	0.476636	0.999833	10	ASAH1	IDH1	DLC1	QPCT	TIMP2	METTL7A	PPBP	B2M	CTSS	LTF
mitochondrial intermembrane space (GO:0005758)	0.879201	0.999833	7	COA4	NLN	AIFM1	UQCC2	SIRT5	NDUFS1	FBXL4
pi-body (GO:0071546)	0.771998	0.999833	1	PIWIL2
ribonuclease P complex (GO:0030677)	0.625923	0.999833	2	TRMT10C	RPP14
trans-Golgi network membrane (GO:0032588)	0.805264	0.999833	11	2019-03-01	APP	VPS53	AP4E1	ARL1	RHOBTB3	HLA-DPB1	RAB6A	LGR5	LLGL1	TMEM165	HLA-DQB1
replication fork (GO:0005657)	0.690908	0.999833	4	WDHD1	MMS22L	DONSON	SMARCAD1
peroxisomal membrane (GO:0005778)	0.55083	0.999833	7	ACBD5	PEX5L	ABCD2	PEX19	PEX3	PEX2	PEX13
Cul5-RING ubiquitin ligase complex (GO:0031466)	0.725709	0.999833	1	ASB4
paranode region of axon (GO:0033270)	0.725709	0.999833	1	ERMN
spindle microtubule (GO:0005876)	0.761562	0.999833	7	TBL1XR1	KIF3A	KNTC1	CALM3	KIF11	CALM1	CLASP2
box C/D snoRNP complex (GO:0031428)	0.725709	0.999833	1	NOP58
clathrin-coated vesicle (GO:0030136)	0.745357	0.999833	15	SCARB2	SYT2	TFRC	SGIP1	RAB27B	AP2B1	SYT9	SCAMP1	EGFR	EPN3	SNX18	AAK1	IL7R	STEAP2	RAB5A
nucleolus (GO:0005730)	0.442262	0.999833	116	SRP19	PRDM5	THUMPD3	NUCKS1	RRP8	RPL7	RABGEF1	PPP1CC	RPS6KA6	MYC	ZNF207	PDK3	CPNE3	TRIM27	PITX1	PDK1	DDX17	TSPYL1	AGTPBP1	SCAF11	SLC30A5	IPMK	WDR75	DNTTIP2	ACSL5	ZBTB33	FBXO11	THAP2	EEF1A1	KAT6A	CMPK1	SRSF5	ATF3	ZNF397	RPAP2	DSN1	ATXN1	RNF213	DHX33	S100A16	MBIP	SURF6	LLPH	ZC3H14	ZC3H15	N4BP1
Cul2-RING ubiquitin ligase complex (GO:0031462)	0.522102	0.999833	3	ZYG11B	ASB4	ZSWIM6
mitotic spindle pole (GO:0097431)	0.838999	0.999833	3	MAP10	STAG2	RAE1
kinesin complex (GO:0005871)	0.779783	0.999833	7	KIF5C	KIF3A	KIF26B	KIF5B	KIF14	KIF1C	KIF11
integral component of endoplasmic reticulum membrane (GO:0030176)	0.776032	0.999833	18	SLC35B3	ANKLE2	SLC35B4	SAMD8	HSPA5	ELOVL2	SPPL2A	SYVN1	ELOVL6	SGMS2	HLA-A	2019-03-06	PKD2	TMCO1	TAPBP	TMEM33	ACER3	HLA-DPB1	HLA-DQB1
RNA polymerase II transcription factor complex (GO:0090575)	0.44396	0.999833	26	YAP1	GTF2A1	GTF2A2	THRB	RORA	RORB	HIF1A	JUNB	TEAD1	TEAD2	SMAD2	POU2F1	PRMT2	NFYA	NR1D2	MED4	GTF2F2	MED6	GTF2H5	SFPQ	CREB1	NR5A2	TFDP1	TFDP2	TAF4B	TAF3
DNA-directed RNA polymerase II, holoenzyme (GO:0016591)	0.471122	0.999833	16	POLR2M	GTF2A1	GTF2A2	PEX2	RTF1	RPRD2	MED4	RPAP2	GTF2F2	MED6	GTF2H5	POLR2D	POLR2F	TAF4B	TAF3	PPARGC1A
dendrite (GO:0030425)	0.415773	0.999833	38	GRIA2	NLGN1	KCNC2	SYAP1	HTR2C	CLU	CRHBP	DNER	P2RY1	CAPN2	KIF1C	VSTM5	TP63	GABRA2	GABRA1	MME	KCNB1	BDNF	HOMER2	GABRA4	BNIP3	INSR	GABRA3	RAB27A	COBL	ANK3	SLC5A7	IL1RAPL1	NF1	STRN	HAP1	FGF13	CPEB3	RPL28	RAB5A	SHANK2	PI4K2A	CPEB4
microtubule organizing center (GO:0005815)	0.456796	0.999833	87	MAP10	C2CD5	CETN3	CEP120	BICD1	BICD2	MECP2	PPP4R2	KIF5B	CHEK1	NEK1	CEP170	BBS7	PRKACB	BCAS2	ZNF322	LRRCC1	CDKL2	CCDC38	GEN1	MKKS	PPP1R12A	CKAP2L	HAUS3	IFT80	ACTR8	DYNLL2	WDR35	CCSAP	HAUS2	TTI2	KAT2B	RRAGD	SPECC1L	TRIM59	ALPK3	LRIF1	PAFAH1B1	DCTN5	PXK	AKNA	DCTN2	ROCK2	DCTN4	VPS4A	CEP85L
peroxisomal part (GO:0044439)	0.756529	0.999833	11	ACBD5	PEX5L	ABCD2	PEX19	AMACR	PEX3	ACOX1	IDH1	PEX2	IDE	PEX13
transcriptionally active chromatin (GO:0035327)	0.770601	0.999833	3	TTC37	ESR1	AFF4
mitochondrial proton-transporting ATP synthase complex, coupling factor F(o) (GO:0000276)	0.771998	0.999833	1	ATP5G1
actin-based cell projection (GO:0098858)	0.780253	0.999833	10	ITGB1	VCAM1	CXADR	ANGPT1	RDX	CD302	TEK	IQGAP2	FGF13	CD44
brush border membrane (GO:0031526)	0.555407	0.999833	5	PEX19	SLC11A2	ITLN1	CD36	SHANK2
mitotic spindle midzone (GO:1990023)	0.576568	0.999833	2	MAP10	RCC2
nuclear chromatin (GO:0000790)	0.44925	0.999833	44	HDAC2	NUFIP1	NUCKS1	YY1	NIPBL	CHAF1B	RBBP4	ALKBH1	TRPS1	MYC	NRIP1	MCMBP	JUNB	GABPA	TP63	MEF2A	SMARCE1	NCOA1	SMAD2	SMARCC1	CPSF6	CBX5	ATRX	H2AFV	PAX6	UBE2A	ACTR8	ESR1	SMARCA2	UCHL5	PHOX2B	RUNX2	FER	CREB1	HNRNPK	SP1	POLR3D	BRMS1L	ZFP42	ASXL2	ANP32E	POLR3G	MXD1	ASF1A
mitochondrion (GO:0005739)	0.744943	0.999833	165	DMGDH	ISCA2	MPV17L	CISD1	MPV17L2	GHITM	CLU	NDUFC2-KCTD14	ELK3	GLS	PPP1CC	RPS6KA6	GJA1	MPC1	ALKBH1	PMPCB	PDK3	CYP1B1	CPNE3	PDK1	SLC25A46	GSTK1	BNIP3L	AGTPBP1	CMC1	SLC11A2	ACSL5	LIG3	GTPBP8	CLPX	SLC9B2	SCO1	MTHFD2	MTHFD2L	FDX1	YME1L1	TFAM	SUCLG2	CMPK2	VDAC2	RAB38	DNA2	ALDH7A1	PI4K2A	FECH	COX15
vacuolar lumen (GO:0005775)	0.476527	0.999833	28	SCARB2	ASAH1	SDC2	GDI2	GNS	LIPA	CTSS	PLAC8	HEBP2	DSN1	TTR	GM2A	PSMD1	IDS	MAPK1	GPC5	GPC4	GPC6	ARSB	NHLRC3	TUBB	KERA	PA2G4	HRNR	DNAJC3	VCAN	MAN2B2	FRK
specific granule lumen (GO:0035580)	0.635758	0.999833	10	ERP44	DLC1	QPCT	TIMP2	RAB27A	B2M	FRK	KPNB1	VCL	LTF
cytoskeleton (GO:0005856)	0.607238	0.999833	86	CLIC5	TENM1	ONECUT2	WIPF1	IFIT5	BICD1	CLU	LMOD2	MYLK	PCLO	OPHN1	KNTC1	MYOZ3	TOPBP1	MYOZ2	ACTR3	PRKCI	SLC30A9	PPP1R12A	DST	TRPC4	TPM3	TUBB	MRPS23	HAUS3	RHOH	ANK3	GTF2F2	SHROOM4	MTSS1	CD2AP	DNM3	FRMD3	THAP6	ADAM17	TUBB2B	PREPL	FRMD6	PEAK1	SPECC1L	DCX	PHIP	TNIK	HAP1	PHLDB2	LLGL1
cytoplasmic microtubule (GO:0005881)	0.66362	0.999833	6	DYNC2LI1	MAP10	SERP1	APC	BICD1	CLASP2
endoplasmic reticulum-Golgi intermediate compartment membrane (GO:0033116)	0.574915	0.999833	8	LMAN1	MCFD2	CNIH1	TMED3	TMED2	F5	BET1	TAPBP
ficolin-1-rich granule lumen (GO:1904813)	0.624583	0.999833	20	KCMF1	ASAH1	APAF1	IDH1	AGL	FGL2	HMGB1	MAPK14	GNS	CTSS	EEF1A1	CAND1	QPCT	TIMP2	MAPK1	PPIA	PAFAH1B2	KPNB1	ARSB	VCL
nuclear transcription factor complex (GO:0044798)	0.56741	0.999833	12	SFPQ	NR5A2	POU2F1	TFDP1	THRB	TFDP2	NFYA	NFATC2	RORA	NR1D2	RORB	HIF1A
perinuclear region of cytoplasm (GO:0048471)	0.627157	0.999833	62	RAB3B	ITGB1	APP	TENM1	TFRC	RASEF	SYAP1	PTPN22	BICD1	CLU	YBX3	KIF5B	CAPN2	HIF1AN	TPD52	STX7	SLC11A2	COBL	TSC1	DNM3	EPN3	MT1A	TRAF6	RAPGEF2	ZNF675	PAFAH1B1	HCN4	SET	DCUN1D3	VPS4A	AKAP6	PSEN1	HSP90B1	MTDH	PKHD1	CYB5R4	PLN	TNKS2	VPS53	FIGNL1	UBQLN1	TP53BP2	TPPP	EIF4E	ATP9B	VTI1B
[truncated: 230 more columns]

## Sheet: C. Molecular Function
Term	P-value	Adjusted P-value	Gene Count	Genes
ubiquitin-like protein ligase activity (GO:0061659)	1.36484e-05	0.0126127	55	RNF11	RNF19B	UBE3A	UBE3B	HERC4	KIAA1586	TRIM27	BTRC	RNF152	RNF111	SHPRH	RNF44	NHLRC3	AKTIP	MSL2	RC3H1	NOSIP	PEX2	PIAS2	PIAS1	RNF144A	UBE2R2	RNF128	HECW1	UBE2V2	PDZRN3	ANAPC1	RNF38	UBR3	XIAP	NEDD4L	UBR1	CBL	C18ORF25	HECTD2	HECTD4	HLTF	RNF217	LONRF3	RFFL	LONRF2	BRAP	UBE2H	RNF24	SYVN1	UBE2A
ubiquitin protein ligase activity (GO:0061630)	3.64881e-05	0.0126127	54	RNF11	RNF19B	UBE3A	UBE3B	HERC4	TRIM27	BTRC	RNF152	RNF111	SHPRH	RNF44	NHLRC3	AKTIP	MSL2	RC3H1	NOSIP	PEX2	RNF144A	UBE2R2	RNF128	HECW1	UBE2V2	PDZRN3	ANAPC1	RNF38	UBR3	XIAP	NEDD4L	UBR1	CBL	C18ORF25	HECTD2	HECTD4	HLTF	RNF217	LONRF3	RFFL	LONRF2	BRAP	UBE2H	RNF24	SYVN1	UBE2A	UBE2G2	2019-03-06	CUL4A
ubiquitin-protein transferase activity (GO:0004842)	2.82122e-05	0.0126127	100	RNF19B	UBE2D1	UBE3A	UBE3B	BACH1	HERC4	TRIM24	FBXO3	TRIM27	BTRC	RNF111	RNF44	WSB1	NHLRC3	RC3H1	NOSIP	UBE2E2	FBXO11	FBXW2	RC3H2	RNF128	TRIM17	HECW1	UBE2V2	ANAPC1	NAIP	KLHL18	KLHL15	UBR3	NEDD4L	FBXO45	UBR1	FBXO40	RNF213	HLTF	RNF217	LONRF3	LONRF2	BARD1	BRAP	UBE2H	UBE2A	KLHL24	2019-03-06	FBXO32	2019-03-05
integrin binding (GO:0005178)	0.000126352	0.0327566	31	ECM2	ITGB3	ADAM22	WISP3	HMGB1	FGF2	CYR61	THBS4	WISP1	CTGF	ADAMTS5	ANXA7	ITGAV	MADCAM1	S1PR2	LGALS8	CD177	VCAM1	EGFL6	CXADR	DST	ACTN1	ADAM17	SFRP2	FAP	NOV	COL4A3	ANGPTL3	CD226	PTPN2	FBN1
mRNA binding (GO:0003729)	0.000314012	0.0651262	49	RBM27	YBX3	ELAVL2	RPL7	METTL14	ZFP36	AUH	DENR	SRRM4	RBFOX1	NCBP2	RC3H1	THOC2	ESRP2	ESRP1	ETF1	PABPC1	RBM8A	CSTF2	SRSF1	CSTF2T	DAZ3	MRPL13	ZFP36L2	CRYZ	PURB	DHX33	TRA2B	TPR	G3BP2	IGF2BP1	IGF2BP2	SF3B1	MYH10	ZC3H15	RNF20	MYEF2	CPSF6	SAMD4A	PUM2	DAZL	NUDT21	SERBP1	ACO1	TARDBP	GRSF1
transcription factor activity, RNA polymerase II core promoter proximal region sequence-specific binding (GO:0000982)	0.000607562	0.105007	69	ONECUT2	PRDM5	ONECUT1	BHLHE41	SIX1	NR3C1	ELK1	BACH1	GLI3	ELK3	HOXA10	YY1	NKRF	MYC	TEAD1	HOXA5	GABPA	MEF2A	KLF10	ZNF281	ETV1	SOX11	PROX1	EBF4	THAP1	PLSCR1	ELF1	CREB1	RBL1	IRF4	ZFP42	TFEC	TFAM	IRF8	PGR	ATF3	AKNA	TSHZ3	TSHZ1	TSHZ2	NR2C2	ARNTL2	NFIL3	ZKSCAN3	ZNF148	SMAD2
DNA binding (GO:0003677)	0.000734044	0.108743	187	ZNF177	APP	ZBTB25	CCNT1	PRDM5	IFIT5	UBP1	NUCKS1	RORA	IKZF1	AHR	RPL7	YY1	SOX1	MYC	ZNF84	SMARCAD1	SOX6	ZNF566	JUNB	ZFP37	HOXA5	TP63	MEF2A	EOMES	ZNF284	ZNF281	LIG4	ARID5B	ZBTB33	WBP11	POU3F3	RC3H2	THAP1	ISL2	MSH3	KAT6A	ZFP42	THAP9	ZNF559	TFAM	ZNF558	PGR	HOXB2	HIST1H2BH	DNA2
protein serine/threonine kinase activity (GO:0004674)	0.000845183	0.109557	86	DYRK3	SMG1	CCNT2	CCNT1	CCNC	MYLK4	MYLK	RPS6KA3	STK10	DSTYK	RPS6KA6	RPS6KA5	TBK1	AKT3	CHEK1	NEK1	PDK3	CPNE3	MAP3K9	PRKACB	MAP3K7	PRKG1	MAP3K5	ACVR1	CDKL2	CSNK1G3	PRKCI	CAMK1D	HUNK	IRAK3	PRPF4B	IRAK4	UHMK1	TGFBR2	BMP2K	ULK2	ULK1	SIK1	SGK3	ALPK3	TNIK	PRKD1	SGK2	CSNK1G1	PRKAA1	PRKAA2
protein kinase activity (GO:0004672)	0.000980661	0.112994	114	CCNT2	CCNT1	IL5RA	CCNC	FGF2	RPS6KA3	STK10	RPS6KA6	RPS6KA5	TBK1	FGF9	AKT3	CHEK1	TRIM24	NEK1	PDK3	CPNE3	MAP3K9	PRKACB	MAP3K7	EPHB1	ROS1	EPHB4	MAP3K5	PDK1	EPHB3	ACVR1	CDKL2	CSNK1G3	PRKCI	EPHA6	MUSK	PRPF4B	UHMK1	ULK2	ULK1	SIK1	ROR1	ALPK3	TNIK	PRKD1	ROR2	CSNK1G1	TTBK2	GRK4	STK38L
coreceptor activity involved in Wnt signaling pathway (GO:0071936)	0.00121051	0.12553	6	RYK	ROR1	GPC4	ROR2	GPC6	LRP6
coreceptor activity involved in Wnt signaling pathway, planar cell polarity pathway (GO:1904929)	0.00211658	0.199536	5	RYK	ROR1	GPC4	ROR2	GPC6
transmembrane receptor protein kinase activity (GO:0019199)	0.00273005	0.217774	20	ACVR1	DDR1	EPHA6	MUSK	RYK	INSR	ACVR2A	EGFR	TGFBR2	ERBB3	ROR1	TEK	ROR2	TRIM27	MET	EPHB1	ROS1	EPHB4	BMPR1A	EPHB3
PDZ domain binding (GO:0030165)	0.00273005	0.217774	20	NSF	NLGN1	GRID2	FZD3	CXADR	CADM1	SDC2	KIF14	ATP2B4	CRIM1	ARHGAP29	ATP2B2	ATP2B1	PSEN1	CLCN3	SSTR2	ADAM17	SNTG2	ACOX1	RAPGEF2
transcriptional activator activity, RNA polymerase II transcription regulatory region sequence-specific binding (GO:0001228)	0.00370541	0.274465	66	ONECUT2	ONECUT1	SIX1	PRDM2	RORA	NR3C1	ELK1	GLI3	HOXC10	ELK3	HOXA10	NKRF	TRPS1	MYC	HOXA5	GABPA	MYOG	MEF2A	KLF10	VEZF1	ETV1	SOX11	EBF4	RUNX1	PLSCR1	ELF1	CREB1	TFDP1	TFDP2	IRF4	TFEC	TFAM	PGR	HOXB2	IRF6	ATF3	AKNA	HOXD13	NR2C2	HIF1A	NHLH1	PLAGL1	ALX1	RREB1	ZNF300	SMAD2
oxidoreductase activity, acting on paired donors, with incorporation or reduction of molecular oxygen, 2-oxoglutarate as one donor, and incorporation of one atom each of oxygen into both donors (GO:0016706)	0.00421532	0.283276	12	FTO	TMLHE	ALKBH4	TYW5	ALKBH1	TET3	KIAA1456	TET2	TET1	HIF1AN	ALKBH8	PHF8
transcription coactivator activity (GO:0003713)	0.0043707	0.283276	67	KDM5A	THRB	MAML2	RORA	BRCA1	RORB	FGF2	MYSM1	YY1	GRIP1	MED13	TRIM24	JUNB	GABPA	MEF2A	NCOA1	DDX17	MKL2	NCOA2	SMARCC1	PRMT2	ACTN1	ARID5B	SOX11	HCFC2	MED4	ZFX	MED6	PIAS2	WDR77	PIAS1	KAT2B	TFDP1	MED21	KAT6A	MED20	TFEC	ALPK3	NCOA7	VGLL2	BIRC2	YAP1	GTF2A1	GTF2A2	MYCBP	USP16
RNA binding (GO:0003723)	0.0048364	0.29502	270	DMGDH	TES	TFRC	RTCA	IFIT5	CISD2	GPATCH4	HNRNPR	ADARB2	IFIT1	RPL9	DCAF4	RRP8	RPL7	ALKBH8	NUDT4	IFIT2	SNRPD1	ALKBH1	CPNE3	DENR	SNRPD3	DDX17	SRRM4	RBFOX1	MBNL2	TYW5	SCAF11	ACTN1	FNDC3B	WDR75	RC3H1	DNTTIP2	SOX11	DICER1	HLA-A	RC3H2	UHMK1	ZC3H11A	SARNP	KIAA1456	TFAM	KCTD12	RPL28	CSTF2	SUPT4H1
chemokine binding (GO:0019956)	0.00573977	0.330675	8	CX3CR1	ITGB1	ZFP36	ITGB3	CXCR4	ACKR3	ITGAV	HMGB1
ubiquitin conjugating enzyme binding (GO:0031624)	0.00735948	0.331693	10	RNF144A	ZMYM2	DCUN1D5	TRAF6	DCUN1D3	RNF217	DCUN1D1	RNF19B	LONRF3	2019-03-06	LONRF2
ATPase activity, coupled to transmembrane movement of ions, phosphorylative mechanism (GO:0015662)	0.00927904	0.331693	9	ATP2B4	ATP2A2	ATP2B2	ATP2B1	ATP13A3	ABCB11	ATP2C1	ATP6V1C1	ATP6V1C2
MAP kinase kinase kinase activity (GO:0004709)	0.00984986	0.331693	22	DDR1	MAP3K1	EPHA6	MUSK	RYK	INSR	MAP3K7CL	EGFR	TAOK3	ERBB3	TAOK1	ROR1	TEK	MAP3K9	ROR2	MAP3K7	MET	EPHB1	ROS1	EPHB4	MAP3K5	EPHB3
mRNA 3'-UTR binding (GO:0003730)	0.00772409	0.331693	19	RNF20	RC3H1	DAZ3	YBX3	ELAVL2	ZFP36L2	CRYZ	PUM2	DAZL	ZFP36	AUH	SERBP1	IGF2BP1	PABPC1	IGF2BP2	TARDBP	CPEB3	CPEB2	CPEB4
GABA-A receptor activity (GO:0004890)	0.0120571	0.331693	8	GABRA2	GABRB3	GABRR2	GABRB2	GABRA1	GABRB1	GABRA4	GABRA3
kinase activity (GO:0016301)	0.0062373	0.331693	64	DGKG	DYRK3	SMG1	DGKE	DGKB	PIK3CB	PIK3C2A	PIK3CG	RPS6KA3	NADK2	RPS6KA6	RPS6KA5	TBK1	PPIP5K2	RFK	NMRK1	AKT3	CHEK1	NEK1	PDK3	SEPHS1	SEPHS2	PRKACB	MAP3K7	PRKG1	MAP3K5	PDK1	ACVR1	CDKL2	CSNK1G3	PRKCI	PRPF4B	KSR2	IRAK4	PGM2L1	PEAK1	ULK1	SGK3	ALPK3	PIK3C3	TNIK	PRKD1	DGKI	PRKAA1	PRKAA2	TTBK2
transcriptional activator activity, RNA polymerase II core promoter proximal region sequence-specific binding (GO:0001077)	0.0106872	0.331693	42	AKNA	ONECUT2	ONECUT1	SIX1	NR3C1	NR2C2	ELK1	GLI3	ELK3	HOXA10	NKRF	MYC	HOXA5	GABPA	MEF2A	KLF10	SMAD2	TFAP2A	BCL11B	HMGA2	ETV1	SOX11	EBF4	GRHL1	ESR1	PHOX2B	NR4A2	NR4A1	KLF7	PLSCR1	ELF1	CREB1	HNRNPK	KLF5	NFIA	NFIB	IRF4	SP1	TFEC	TFAM	PGR	SSBP2
thiol-dependent ubiquitin-specific protease activity (GO:0004843)	0.0071587	0.331693	22	USP13	USP46	OTUD4	USP8	USP25	USP15	USP16	USP49	USP6	USP31	USP32	USP44	USP45	OTUD7B	TNFAIP3	UCHL3	MYSM1	UCHL5	STAMBP	EIF3F	OTUD1	OTUD3
transcriptional repressor activity, RNA polymerase II transcription regulatory region sequence-specific binding (GO:0001227)	0.00951449	0.331693	39	TSHZ3	SATB1	TSHZ1	TSHZ2	PRDM5	BHLHE41	FOXO3	ZBTB4	BACH1	PURB	YY1	PURA	HMBOX1	NFIL3	TRPS1	MLX	HIVEP1	ZKSCAN3	ZNF148	TFAP2A	MYEF2	ZNF140	ZNF281	ARID5B	HMGA2	NR1D2	PROX1	THAP1	KLF8	RBL1	ZFP42	SNAI1	IRF8	ZNF217	ZNF536	ZNF831	MXD1	HOXD9	RCOR1
RNA polymerase II regulatory region sequence-specific DNA binding (GO:0000977)	0.0106455	0.331693	97	PRDM5	PRDM2	RORA	RORB	NR3C1	ELK1	BACH1	ELK3	HOXA10	YY1	MYC	JUNB	HOXA5	MEF2A	SMARCC1	ZNF281	ARID5B	SOX11	THAP1	RUNX1	RFX7	ZFP42	TFAM	PGR	ATF3	ZNF277	AKNA	PRDM10	ZBTB4	PHF21A	NHLH1	ZKSCAN3	ALX1	ZNF148	RREB1	ZBED4	SMAD2	TFAP2A	POU2F1	NFATC2	NR1D2	ESR1	PHOX2B	NR4A2	NR4A1	HNRNPK
iron ion binding (GO:0005506)	0.00739883	0.331693	17	FTO	ISCA2	FECH	TYW5	ALOX15	TET2	TET1	ALKBH8	PHF8	HEPH	ALKBH1	AGMO	TET3	FDX1	KIAA1456	HIF1AN	LTF
kinase inhibitor activity (GO:0019210)	0.00834372	0.331693	18	GMFB	DUSP19	LRRC4	RHOH	GSKIP	LRRC66	ASPN	LRP6	DNAJC3	TAOK3	FLRT2	FLRT3	LRRTM4	SH3BP5	MBIP	SMCR8	LRRC4C	SOCS4
transmembrane receptor protein tyrosine kinase activity (GO:0004714)	0.0119338	0.331693	18	DDR1	EPHA6	MUSK	RYK	INSR	CRIM1	EGFR	EFEMP1	ERBB3	ROR1	TEK	ROR2	TRIM27	MET	EPHB1	ROS1	EPHB4	EPHB3
ubiquitin-like protein conjugating enzyme binding (GO:0044390)	0.0121546	0.331693	11	RNF144A	ZMYM2	DCUN1D5	TRAF6	DCUN1D3	RNF217	DCUN1D1	RNF19B	UBA2	LONRF3	2019-03-06	LONRF2
core promoter proximal region sequence-specific DNA binding (GO:0000987)	0.0119834	0.331693	62	ONECUT2	PRDM5	BHLHE41	SIX1	NR3C1	ELK1	GLI3	ELK3	HOXA10	YY1	NKRF	MYC	JUNB	TEAD1	HOXA5	GABPA	MYOG	MEF2A	KLF10	SMARCC1	ZNF281	ETV1	THAP1	ELF1	CREB1	RFX7	IRF4	ZFP42	TFEC	TFAM	IRF8	PGR	ATF3	HDAC2	AKNA	NR2C2	RBBP4	ZKSCAN3	ZNF148	SMARCE1	SMAD2	TFAP2A	MYEF2	NFATC2	GRHL1	ESR1
thiol-dependent ubiquitinyl hydrolase activity (GO:0036459)	0.00998685	0.331693	25	USP13	OTUD4	USP15	WDR48	USP16	USP31	USP32	OTUD7B	TNFAIP3	MYSM1	OTUD6B	USP24	USP46	USP8	USP25	USP49	USP6	USP44	USP45	UCHL3	UCHL5	STAMBP	EIF3F	OTUD1	OTUD3
core promoter sequence-specific DNA binding (GO:0001046)	0.00919747	0.331693	21	KDM5A	KLF10	TFAP2A	POU2F1	NFYA	KMT2A	PAX6	RORA	SOX11	NR1D2	PROX1	CHD2	PRDM10	ESR1	SOX1	TAF1B	SP1	NRIP1	RREB1	ZNF277	ZNF431
protein kinase regulator activity (GO:0019887)	0.0111572	0.331693	28	CCNT2	GMFB	CCNT1	DUSP19	LRRC4	GSKIP	CCNC	FLRT2	FLRT3	LRRTM4	SH3BP5	MBIP	LRRC4C	SOCS4	ELP4	IPCEF1	LRRC66	ASPN	CNKSR2	DNAJC3	CXCL10	RGCC	TAOK3	APC	PRKAR1A	CNKSR3	SMCR8	FGF13
transcriptional repressor activity, RNA polymerase II core promoter proximal region sequence-specific binding (GO:0001078)	0.0104189	0.331693	26	TSHZ3	TSHZ1	TSHZ2	PRDM5	BHLHE41	BACH1	YY1	NFIL3	ZKSCAN3	ZNF148	TFAP2A	MYEF2	ZNF281	HMGA2	NR1D2	PROX1	THAP1	KLF8	RBL1	ZFP42	SNAI1	IRF8	ZNF217	ZNF536	MXD1	RCOR1
RNA polymerase II core promoter proximal region sequence-specific DNA binding (GO:0000978)	0.0115015	0.331693	59	ONECUT2	PRDM5	BHLHE41	SIX1	NR3C1	ELK1	GLI3	ELK3	HOXA10	YY1	NKRF	MYC	JUNB	HOXA5	GABPA	MYOG	MEF2A	KLF10	SMARCC1	ZNF281	ETV1	THAP1	ELF1	CREB1	RFX7	IRF4	ZFP42	TFEC	TFAM	IRF8	PGR	ATF3	HDAC2	AKNA	NR2C2	RBBP4	ZKSCAN3	ZNF148	SMARCE1	SMAD2	TFAP2A	MYEF2	NFATC2	GRHL1	ESR1	PHOX2B
oxidoreductase activity, acting on NAD(P)H, oxygen as acceptor (GO:0050664)	0.0134018	0.347443	6	CYB5R4	AIFM1	CYBB	NOX5	DUOX2	NOX1
GABA-gated chloride ion channel activity (GO:0022851)	0.0134018	0.347443	6	GABRA2	GABRB3	GABRA1	GABRB1	GABRA4	GABRA3
RNA polymerase III activity (GO:0001056)	0.0156298	0.385907	7	CRCP	POLR3A	POLR3D	POLR3E	POLR3F	POLR2F	POLR3K
DNA-directed 5'-3' RNA polymerase activity (GO:0003899)	0.0152892	0.385907	12	CRCP	POLR3A	POLR3D	POLR1B	MED21	POLR3E	TWISTNB	MED20	POLR2D	POLR3F	POLR2F	POLR3K
acetyltransferase activity (GO:0016407)	0.016885	0.39795	9	SMARCE1	NAA50	KAT2B	ESCO1	KAT6B	KAT6A	DBT	ESCO2	PAFAH1B2
phospholipid-translocating ATPase activity (GO:0004012)	0.0166502	0.39795	8	ATP8B3	ATP8A2	ABCB1	ATP8A1	ATP10D	ATP11B	ATP10A	ATP9B
sequence-specific DNA binding (GO:0043565)	0.0175969	0.40551	83	ZNF177	KDM5B	SMG1	PRDM5	UBP1	SIX1	RORA	TFCP2L1	MECP2	YY1	ZNF529	ZNF566	ZFP37	TEAD1	TEAD2	TP63	MYOG	MEF2A	EOMES	ZNF281	FOXL1	ZBTB33	POU3F3	TSN	WDR77	THAP1	NR5A2	IRF4	MTF2	ZFP42	THAP9	ZNF559	TFAM	ZNF558	HOXB2	IRF6	ZNF831	ZNF556	ZNF599	ZNF674	ZNF596	HDAC2	KMT2A	SATB1	NR2C2	FOXO3
ceramidase activity (GO:0017040)	0.0183873	0.414514	4	ASAH1	ASAH2B	ASAH2	ACER3
phosphotransferase activity, alcohol group as acceptor (GO:0016773)	0.020337	0.448711	56	DGKG	DYRK3	SMG1	DGKE	DGKB	PIK3CB	PIK3C2A	PIK3CG	RPS6KA3	NADK2	RPS6KA6	RPS6KA5	TBK1	RFK	NMRK1	AKT3	CHEK1	NEK1	PDK3	MAP3K7	PRKG1	MAP3K5	PDK1	ACVR1	CDKL2	CSNK1G3	PRKCI	PRPF4B	KSR2	IRAK4	PGM2L1	PEAK1	SGK3	ALPK3	PIK3C3	TNIK	DGKI	PRKAA1	PRKAA2	NT5C2	TTBK2	RIPK1	CDK17	MAP3K2	MAP3K1	EIF2AK2
cation-transporting ATPase activity (GO:0019829)	0.0212515	0.459122	10	ATP8A1	ATP5A1	ATP2B4	ATP2A2	ATP2B2	ATP2B1	ATP13A3	ABCB11	ATP2C1	ATP5G1
DNA binding, bending (GO:0008301)	0.0219235	0.463972	7	TOP2A	SAP30L	TFAM	HMGA2	HMGB1	FOXL1	TRERF1
GABA receptor activity (GO:0016917)	0.022379	0.464141	8	GABRA2	GABRB3	GABRR2	GABRB2	GABRA1	GABRB1	GABRA4	GABRA3
tRNA binding (GO:0000049)	0.0233403	0.474587	12	AIMP1	EEF1A1	SEPSECS	SLFN13	SLFN11	TRMT10C	TYW5	ALKBH1	KIAA1456	IFIT5	DARS2	ALKBH8
protein serine/threonine phosphatase activity (GO:0004722)	0.0250184	0.498925	17	PHLPP2	PHLPP1	PPM1L	SSU72	PPM1D	RPAP2	PPM1E	PPM1F	PPP1CB	PPP1CC	PPM1A	PPP3R1	PPP1R3C	PPP2R2B	CTDSP2	PPP1R3D	CAMK2G
phosphatidylinositol phosphate 4-phosphatase activity (GO:0034596)	0.0319154	0.501459	4	INPP4A	INPP4B	SACM1L	SYNJ2
transcription coactivator binding (GO:0001223)	0.0288946	0.501459	6	CCNT2	RORA	AHR	TEAD1	ESR1	TEAD2
inositol trisphosphate phosphatase activity (GO:0046030)	0.0257052	0.501459	5	INPP4A	INPP4B	INPP5A	INPP1	INPP5E
cation:sugar symporter activity (GO:0005402)	0.0319154	0.501459	4	SLC2A9	SLC2A10	SLC2A13	SLC2A12
calcium-transporting ATPase activity (GO:0005388)	0.0288946	0.501459	6	ATP2B4	ATP2A2	ATP2B2	ATP2B1	ATP13A3	ATP2C1
transmembrane receptor protein serine/threonine kinase activity (GO:0004675)	0.0288946	0.501459	6	ACVR1	SOSTDC1	LTBP1	ACVR2A	TGFBR2	BMPR1A
5'-3' RNA polymerase activity (GO:0034062)	0.0267524	0.501459	10	CRCP	POLR3A	POLR1B	MED21	TWISTNB	MED20	POLR2D	POLR3F	POLR2F	POLR3K
calcium-dependent protein serine/threonine phosphatase activity (GO:0004723)	0.0319154	0.501459	4	PPM1A	PPP3R1	CAMK2G	PPM1F
ubiquitin-like protein ligase binding (GO:0044389)	0.0309653	0.501459	63	CD40	PTPN22	BRCA1	CLU	CASP10	DBT	UBXN7	PRKACB	CCDC50	SHPRH	TUBB	AKTIP	TRAF1	YWHAZ	UBE2R2	PRKAR1A	TRAF6	UBE2V2	SPOPL	HIST1H2BH	ZNF675	VCL	USP13	CXCR4	KLHL11	HIF1A	FOXO1	ASB15	EGFR	BAG4	ERBB3	UBD	HLTF	SPOP	MFN2	TNFRSF14	RIPK1	RFFL	PPARGC1A	RNF20	SMAD2	UBL4A	MOAP1	USP25	UBE2H	FZD5
ubiquitin protein ligase binding (GO:0031625)	0.0265008	0.501459	61	CD40	PTPN22	BRCA1	CLU	CASP10	DBT	UBXN7	PRKACB	CCDC50	SHPRH	TUBB	AKTIP	TRAF1	YWHAZ	UBE2R2	PRKAR1A	TRAF6	UBE2V2	SPOPL	ZNF675	VCL	USP13	CXCR4	KLHL11	HIF1A	FOXO1	ASB15	EGFR	BAG4	ERBB3	UBD	HLTF	SPOP	MFN2	TNFRSF14	RIPK1	RFFL	PPARGC1A	RNF20	SMAD2	UBL4A	MOAP1	USP25	UBE2H	FZD5	HSPA5
ubiquitin binding (GO:0043130)	0.0290398	0.501459	17	USP13	TOP2A	USP25	WDR48	USP16	UBXN2B	CXCR4	TNFAIP3	UBE2A	UCHL3	DDI2	UBE2N	SPRTN	UBXN7	RAE1	TRIM32	BIRC2
phosphoprotein phosphatase activity (GO:0004721)	0.0311529	0.501459	32	PHLPP2	PHLPP1	PPM1L	DUSP19	PTPN22	CTDSPL2	DUSP18	PPM1D	RPAP2	PPM1E	PPM1F	PTPRG	PPP1CC	PTPRZ1	UBASH3B	DUSP2	DUSP3	EYA1	EYA4	DUSP28	PTPN13	SSH2	PTPN14	SSH1	PPM1A	MINPP1	PPP1R3C	PPP2R2B	CTDSP2	PPP1R3D	PTPN5	PTPN2
metal ion binding (GO:0046872)	0.0312479	0.501459	90	TOP2A	DYRK3	C2CD5	MCTP1	CIB4	ATP2A2	EFCAB6	PKD2	CDH8	SLC8A1	NUDT3	CDH7	PCLO	ENOSF1	DNER	ENPP1	TRIM27	PRKACB	PSPH	MAP3K5	MBL2	TPD52	IRAK3	ASPN	NME1	PLSCR1	TMEM2	MT1A	STIM2	MTHFD2	CDH11	PLSCR4	RAPGEF2	DSG1	SIK1	FKBP9	HPRT1	SLC25A12	ASTN2	MCTP2	CDH18	PI4K2A	CDH19	CRP	SLC24A2	RPE
transcription regulatory region sequence-specific DNA binding (GO:0000976)	0.0315621	0.501459	62	KDM5A	THRB	JMJD1C	PRDM2	RORA	RORB	CHD2	GLI3	HOXC10	YY1	SOX1	TRPS1	MLX	TEAD1	MYOG	MEF2A	KLF10	ARID5B	VEZF1	SOX11	PROX1	RUNX1	SFPQ	CREB1	NR5A2	TFDP1	TFDP2	ATF3	ZNF431	KMT2A	SATB1	NR2C2	ZBTB4	PHF21A	PURB	PURA	NFIL3	NHLH1	PLAGL1	ZNF704	TBX20	NRIP1	ALX1	RREB1	ZBED4	IVNS1ABP
magnesium ion binding (GO:0000287)	0.0345226	0.51884	30	TOP2A	DYRK3	CIB4	ATP10D	GNAI1	NUDT3	TDG	FIGNL1	ENOSF1	STK38L	PRKACB	PSPH	AASDHPPT	MAP3K5	MARK1	IDH1	EPHX2	IRAK3	CDC42BPB	CDC42BPA	NME1	SRPK1	ICK	SNRK	GCLC	MTHFD2	UBA2	SIK1	HPRT1	PI4K2A
amyloid-beta binding (GO:0001540)	0.0335309	0.51884	14	GRIA2	MSR1	TGFB2	NLGN1	FZD5	COL25A1	INSR	CLSTN1	SORL1	CLU	APBB2	IAPP	CD36	ITM2B
core promoter binding (GO:0001047)	0.034183	0.51884	24	MYOG	KDM5A	KLF10	NFYA	KMT2A	ZNF281	HMGA2	RORA	NR1D2	PROX1	NR3C1	CHD2	FOXO3	ESR1	RUNX1	SFPQ	SOX1	SP1	AGO1	DHX36	NRIP1	CRY1	KANSL1L	ZNF431
purine ribonucleoside triphosphate binding (GO:0035639)	0.0358829	0.53158	81	DYRK3	RASEF	KIF14	IDE	RND2	RND3	RAB22A	RPS6KA5	PPIP5K2	AKT3	MYO18A	PDK3	ENPP1	SEPHS1	PRKACB	MAP3K5	ACVR1	RAB2A	PRKCI	TUBB	DARS2	RHOH	IRAK3	CLPX	UHMK1	NME1	EEF1A1	TUBB2B	RAP2B	RRAGD	LANCL2	SIK1	RAB38	MCM6	ARHGEF5	PI4K2A	NAIP	PRPS2	TUBAL3	HSPA4L	ATP10D	VPS4A	ATP5A1	GNAI3	ARL1	RHOBTB3
voltage-gated ion channel activity involved in regulation of postsynaptic membrane potential (GO:1905030)	0.0377168	0.543226	8	HCN4	CATSPER2	SCN7A	PKD2	SCN2A	SCN3A	SCN1A	HCN1
voltage-gated sodium channel activity (GO:0005248)	0.0377168	0.543226	8	HCN4	CATSPER2	SCN7A	PKD2	SCN2A	SCN3A	SCN1A	HCN1
transforming growth factor beta binding (GO:0050431)	0.0393126	0.550908	7	ACVR1	CD109	ITGAV	LTBP2	CD36	LTBP1	TGFBR2
R-SMAD binding (GO:0070412)	0.0393126	0.550908	7	SMAD2	PPM1A	RANBP3	RGCC	DROSHA	PAX6	LDLRAD4
zinc ion binding (GO:0008270)	0.041917	0.579572	63	KDM5A	KDM5B	VPS29	ZNF253	RNF11	TES	KDM1B	HHIP	PRDM2	IDE	ALKBH8	PHF8	YY1	ZMYM2	ADAMTS3	TRIM2	ZNF84	TIMP2	TRIM24	ZNF207	PMPCB	ENPP1	HIF1AN	ZFP37	SLC30A8	MME	ESCO1	SLC30A5	BHMT2	SORD	TET2	SIRT5	THAP1	ZNF91	MT1A	KAT6A	ZNF117	SLU7	ZNF675	BIRC2	KPNB1	PAPPA2	C11ORF54	USP16	ZNF195	KMT2A
voltage-gated chloride channel activity (GO:0005247)	0.0534785	0.637439	5	CLCN5	CLCN4	BSND	ANO6	CLCN3
sodium:amino acid symporter activity (GO:0005283)	0.0534785	0.637439	5	SLC6A5	SLC38A1	SLC1A1	SLC6A11	SLC6A1
pyrimidine nucleotide-sugar transmembrane transporter activity (GO:0015165)	0.0499118	0.637439	4	SLC35A3	SLC35B4	SLC35D1	SLC35D3
sulfuric ester hydrolase activity (GO:0008484)	0.0529713	0.637439	6	STS	ARSK	IDS	GNS	ARSB	SULF2
cysteine-type endopeptidase inhibitor activity involved in apoptotic process (GO:0043027)	0.0475199	0.637439	8	PRDX3	RPS6KA3	TNFAIP8	XIAP	SERPINB9	BIRC2	NAIP	BIRC3
glucose transmembrane transporter activity (GO:0005355)	0.0506439	0.637439	7	SLC2A14	SLC2A10	SLC2A13	SLC2A12	SLC2A3	SLC5A1	PPBP
SUMO binding (GO:0032183)	0.0534785	0.637439	5	CBX4	TDG	UBA2	NR3C1	RNF111
ferrous iron binding (GO:0008198)	0.0506439	0.637439	7	FTO	FECH	HEPH	ALKBH1	KIAA1456	TET2	ALKBH8
bile acid transmembrane transporter activity (GO:0015125)	0.0529713	0.637439	6	SLC10A6	SLC10A2	SLCO1B3	SLCO1A2	AKR1C4	ABCB11
ATPase regulator activity (GO:0060590)	0.0531878	0.637439	11	DNAJC19	BAG4	PLN	BAG2	DNAJB4	DNAJC10	TOR1AIP2	ATP1B4	DNAJC15	FNIP2	TOR1AIP1
ATPase activity, coupled to movement of substances (GO:0043492)	0.0474786	0.637439	15	ATP8B3	ATP8A2	ABCB1	ATP8A1	ABCA5	ABCA6	ATP10D	ABCB5	ATP11B	ABCC9	ATP10A	ABCB11	ABCA10	ATP9B	ABCG2
methylation-dependent protein binding (GO:0140034)	0.0527961	0.637439	14	KDM5A	CBX5	ATRX	NCAPG2	MSL3	CDYL	ING1	CHD1	RRP8	PHF8	MBTD1	ING5	MTF2	GLYR1
transition metal ion binding (GO:0046914)	0.0547903	0.645654	80	KDM5A	KDM5B	VPS29	ISCA2	ZNF253	RNF11	TES	KDM1B	HHIP	PRDM2	IDE	ALKBH8	PHF8	YY1	ZMYM2	ADAMTS3	HEPH	TRIM2	ZNF84	TIMP2	TRIM24	ZNF207	PMPCB	ENPP1	HIF1AN	PRND	ZFP37	SLC30A8	MME	ESCO1	TYW5	SLC30A5	BHMT2	SLC11A2	SORD	TET2	TET1	SIRT5	THAP1	ZNF91	MT1A	DCT	KAT6A	TET3	FDX1	ANG
protein kinase inhibitor activity (GO:0004860)	0.0565711	0.659148	17	GMFB	DUSP19	LRRC4	GSKIP	LRRC66	ASPN	DNAJC3	TAOK3	FLRT2	FLRT3	LRRTM4	SH3BP5	MBIP	FGFR1OP	SMCR8	LRRC4C	SOCS4
protein phosphatase binding (GO:0019903)	0.0578612	0.659363	22	ANKLE2	CLEC12B	ATP2B4	MTMR9	AP3B1	MAPK14	ARPP19	FOXO1	EGFR	HSP90B1	SH3RF2	GRIN3A	AKAP11	PPP1R3C	ANKAR	PPP6R3	STRN	MYOZ2	MET	ROS1	MAP3K5	PHACTR4
phosphatase binding (GO:0019902)	0.0573862	0.659363	24	SMAD2	PPP1R12A	FCRL3	CLEC12B	NFATC2	MTMR9	AP3B1	MAPK14	EGFR	HSP90B1	SH3RF2	PPP3R1	CNST	PPP1R3C	ANKAR	RCAN3	PPP6R3	CRY1	MAPK1	PPP1R12B	MET	ROS1	DZIP3	MAP3K5
solute:proton symporter activity (GO:0015295)	0.0638342	0.682433	7	SLC2A9	SLC36A2	SLC15A2	SLC2A10	SLC2A13	SLC2A12	SLC11A2
voltage-gated ion channel activity (GO:0005244)	0.0638342	0.682433	7	GRIN2A	GRIN3A	VDAC2	ANO6	PKD2	GRIN2B	HCN1
neurotransmitter receptor activity involved in regulation of postsynaptic membrane potential (GO:0099529)	0.0638342	0.682433	7	GABRA2	GRIA2	GABRA1	GRID2	GRID1	GABRA4	GABRA3
chemokine receptor activity (GO:0004950)	0.0638342	0.682433	7	CX3CR1	CXCR4	GPR75	ACKR3	CCR7	CCR4	CMKLR1
ATPase binding (GO:0051117)	0.0630322	0.682433	16	USP25	NOP58	PEX19	NUFIP1	RDX	SYVN1	TOR1AIP2	PKD2	METTL21A	ESR1	TOR1AIP1	PEX26	PLN	DNAJC10	PGR	SLC26A9
ATP binding (GO:0005524)	0.0616369	0.682433	53	DYRK3	KIF14	IDE	RPS6KA5	PPIP5K2	AKT3	MYO18A	PDK3	ENPP1	PRKACB	MAP3K5	ACVR1	PRKCI	DARS2	IRAK3	CLPX	UHMK1	NME1	LANCL2	SIK1	MCM6	PI4K2A	NAIP	PRPS2	HSPA4L	ATP10D	VPS4A	ATP5A1	RHOBTB3	ATP1A2	TDG	PGK1	STK38L	N4BP2	MYH10	MARK1	HSPA5	INSR	TNK1	CDC42BPB	HSPA2	CDC42BPA	SRPK1	P2RX7	ICK	TBCK
hydrogen-exporting ATPase activity, phosphorylative mechanism (GO:0008553)	0.0723558	0.684512	4	ATP2A2	ATP2C1	ATP6V1C1	ATP6V1C2
CD4 receptor binding (GO:0042609)	0.0986211	0.684512	3	PLSCR1	PLSCR4	IL16
phosphatase activator activity (GO:0019211)	0.0723558	0.684512	4	CALM3	FRS2	CALM1	PHACTR4
leukotriene receptor activity (GO:0004974)	0.0986211	0.684512	3	CYSLTR1	CYSLTR2	KISS1R
cysteinyl leukotriene receptor activity (GO:0001631)	0.0986211	0.684512	3	CYSLTR1	CYSLTR2	KISS1R
histone methyltransferase activity (H3-K36 specific) (GO:0046975)	0.0986211	0.684512	3	SETD2	SMYD2	ASH1L
NAD(P)H oxidase activity (GO:0016174)	0.0986211	0.684512	3	CYB5R4	AIFM1	DUOX2
BMP receptor activity (GO:0098821)	0.0986211	0.684512	3	SOSTDC1	ACVR2A	BMPR1A
inorganic cation transmembrane transporter activity (GO:0022890)	0.0986211	0.684512	3	MMGT1	SLC41A1	ATP1B4
hexose transmembrane transporter activity (GO:0015149)	0.0719903	0.684512	5	SLC2A10	SLC2A13	SLC2A12	SLC2A3	PPBP
diacylglycerol kinase activity (GO:0004143)	0.0990133	0.684512	4	DGKG	DGKE	DGKB	DGKI
glucocorticoid receptor binding (GO:0035259)	0.0723558	0.684512	4	NR4A2	NR4A1	GRIP1	NRIP1
D-glucose transmembrane transporter activity (GO:0055056)	0.0723558	0.684512	4	SLC2A14	SLC2A10	SLC2A12	SLC2A3
arginine N-methyltransferase activity (GO:0016273)	0.0990133	0.684512	4	PRMT6	PRMT2	FBXO11	WDR77
alpha-mannosidase activity (GO:0004559)	0.0986211	0.684512	3	MAN2B2	MAN2A1	MANEA
voltage-gated anion channel activity (GO:0008308)	0.0863669	0.684512	6	CLCN5	CLCN4	BSND	VDAC2	ANO6	CLCN3
phosphatidylinositol monophosphate phosphatase activity (GO:0052744)	0.0935382	0.684512	5	SACM1L	MTMR8	MTMR9	SYNJ2	MTMR7
semaphorin receptor binding (GO:0030215)	0.0863669	0.684512	6	SEMA5A	SEMA4A	SEMA3C	SEMA4C	SEMA3E	SEMA4F
G-protein activated inward rectifier potassium channel activity (GO:0015467)	0.0990133	0.684512	4	KCNJ10	KCNJ15	KCNJ2	KCNJ3
filamin binding (GO:0031005)	0.0990133	0.684512	4	NEBL	FBLIM1	SYNPO2	DPYSL3
phosphatidylinositol-3-phosphatase activity (GO:0004438)	0.0935382	0.684512	5	SACM1L	MTMR8	MTMR9	SYNJ2	MTMR7
ligand-gated anion channel activity (GO:0099095)	0.0863669	0.684512	6	GABRA2	GABRB3	GABRA1	GABRB1	GABRA4	GABRA3
exoribonuclease activity (GO:0004532)	0.0986211	0.684512	3	CNOT6	CNOT7	DCP2
calcium-activated potassium channel activity (GO:0015269)	0.0863669	0.684512	6	KCNMB1	HPN	KCNMB2	KCNN3	TMEM38A	TMEM38B
benzodiazepine receptor activity (GO:0008503)	0.0990133	0.684512	4	GABRA2	GABRA1	GABRA4	GABRA3
Wnt-activated receptor activity (GO:0042813)	0.0789141	0.684512	7	FZD3	SFRP2	FZD5	FRZB	RYK	ROR1	LRP6
cytidylyltransferase activity (GO:0070567)	0.0723558	0.684512	4	CDS1	PCYT1B	PCYT1A	ISPD
MAP kinase activity (GO:0004707)	0.0935382	0.684512	5	MAPK10	MAPK9	MAPK1	MAPK14	MAPK13
volume-sensitive anion channel activity (GO:0005225)	0.0990133	0.684512	4	LRRC8C	LRRC8D	LRRC8B	CLCN3
store-operated calcium channel activity (GO:0015279)	0.0990133	0.684512	4	TRPC3	TRPC4	STIM2	TRPC1
sphingosine N-acyltransferase activity (GO:0050291)	0.0986211	0.684512	3	CERS3	CERS4	CERS6
ATPase activator activity (GO:0001671)	0.0958777	0.684512	7	DNAJC19	DNAJB4	DNAJC10	TOR1AIP2	ATP1B4	DNAJC15	TOR1AIP1
double-stranded RNA binding (GO:0003725)	0.0703159	0.684512	15	TFRC	STAU2	ACTN1	EIF2AK2	DICER1	ADARB2	TARBP2	MTDH	DHX33	AGO3	AGO1	DHX36	TLR8	DROSHA	TLR3
monocarboxylic acid transmembrane transporter activity (GO:0008028)	0.0912443	0.684512	9	MPC1	SLCO1B3	SLCO1A2	SLC5A12	SLC16A7	SLC16A10	EMB	AKR1C4	SLC16A14
methylated histone binding (GO:0035064)	0.0785479	0.684512	14	KDM5A	CBX5	ATRX	NCAPG2	MSL3	CDYL	ING1	CHD1	RRP8	PHF8	MBTD1	ING5	MTF2	GLYR1
GDP binding (GO:0019003)	0.087879	0.684512	13	RAB2A	RAB3B	RAB4A	RASEF	GNAI3	RAB27A	RAB27B	RAB22A	GNAI1	RAB10	RAP2B	RRAGD	RAB5A
poly(A) binding (GO:0008143)	0.0935382	0.684512	5	KHDRBS1	TIA1	PABPC1	LARP4	ZC3H14
sugar:proton symporter activity (GO:0005351)	0.0990133	0.684512	4	SLC2A9	SLC2A10	SLC2A13	SLC2A12
protein phosphatase regulator activity (GO:0019888)	0.0984929	0.684512	12	RCAN1	ANKLE2	SET	UBXN2B	PPP4R2	PPP2R2B	RCAN3	EIF2AK2	CALM3	CALM1	ARPP19	PHACTR4
phosphotransferase activity, for other substituted phosphate groups (GO:0016780)	0.0990133	0.684512	4	SAMD8	PIGN	SGMS2	AASDHPPT
chloride channel activity (GO:0005254)	0.089017	0.684512	15	GABRA2	GABRB3	GABRB2	GABRA1	CLIC5	GABRB1	GABRA4	GABRA3	ANO6	CLCN3	CLCN5	CLCN4	BSND	SLC26A7	SLC26A9
anion channel activity (GO:0005253)	0.0890281	0.684512	16	GABRA2	GABRB2	GABRA1	CLIC5	GABRA4	GABRA3	CLCN3	CLCN5	CLCN4	BSND	LRRC8C	SLC26A7	LRRC8D	VDAC2	SLC26A9	LRRC8B
SH3 domain binding (GO:0017124)	0.0785479	0.684512	14	WIPF1	SGIP1	PTPN22	CBL	CD2AP	PLSCR1	ABI2	ADAM12	RUFY2	DPYSL3	SH3BP5	ZNF106	WASF2	SOCS4
transferase activity, transferring acyl groups other than amino-acyl groups (GO:0016747)	0.0886634	0.684512	14	CERS3	CERS4	CERS6	ZDHHC20	ZDHHC5	ZDHHC13	ZDHHC21	ZDHHC2	ZDHHC14	ZDHHC15	KAT2B	KAT6B	KAT6A	DBT
double-stranded DNA binding (GO:0003690)	0.0699064	0.684512	23	SMAD2	KDM5B	SATB1	IFIT5	NUCKS1	HMGB1	AFF3	AFF4	YBX3	AFF1	EGFR	AFF2	MECP2	PURB	PURA	HMBOX1	MSH3	SP1	TDG	POLR3F	CRY1	TARDBP	TP63
calcium ion transmembrane transporter activity (GO:0015085)	0.0974768	0.684512	18	SLC24A2	TRPC3	TRPC4	TRPC1	ATP2B4	ATP2A2	ATP2B2	ATP2B1	PSEN1	PKD2	ATP2C1	TMCO1	CACNB2	TRPM7	ATP13A3	TRPM6	TRPM3	MCU
hydrolase activity, acting on carbon-nitrogen (but not peptide) bonds, in linear amides (GO:0016811)	0.0796681	0.684512	18	DARS	ASAH1	HDAC2	ASAH2	SIRT5	WDYHV1	KLK3	HDAC8	PHF21A	GLS	PM20D2	ASAH2B	RBBP4	SIN3B	SAP30L	BRMS1L	MTA3	RCOR1
DNA-dependent ATPase activity (GO:0008094)	0.0983426	0.684512	17	TOP2A	ERCC6L	PBRM1	ATRX	TTF2	CHD2	CHD1	SMARCA2	RAD54B	RBBP4	MSH3	DHX36	MCM4	MCM6	DNA2	POLK	ERCC6
adenyl ribonucleotide binding (GO:0032559)	0.0707577	0.684512	57	DYRK3	KIF14	IDE	RPS6KA5	PPIP5K2	AKT3	MYO18A	PDK3	ENPP1	PRKACB	MAP3K5	ACVR1	PRKCI	DARS2	IRAK3	CLPX	UHMK1	NME1	LANCL2	RAPGEF2	SIK1	MCM6	PI4K2A	NAIP	PRPS2	HSPA4L	ATP10D	VPS4A	ATP5A1	RHOBTB3	ATP1A2	TDG	PGK1	STK38L	N4BP2	MYH10	MARK1	HSPA5	INSR	TNK1	CDC42BPB	HSPA2	CDC42BPA	SRPK1	P2RX7	ICK
protein tyrosine kinase activity (GO:0004713)	0.0781906	0.684512	32	DDR1	IL5RA	SLA	FGF2	EGFR	CAMKK2	ZMYM2	ERBB3	FGF9	TRIM24	TRIM27	EPHB1	ROS1	EPHB4	EPHB3	YES1	EPHA6	MUSK	RYK	INSR	TNK1	ERLIN2	WEE1	FER	PEAK1	FGFR1OP	ROR1	TEK	ROR2	MET	FRK	FGF10
GTP binding (GO:0005525)	0.0781906	0.684512	32	TUBAL3	RASEF	GNAI3	ARL1	RHOBTB3	RND2	RND3	RAB22A	GNAI1	RHOT1	SEPHS1	RAB6A	RAB2A	RAB4A	TUBB	INSR	RAB39A	RHOH	RAB27A	RAB27B	NME1	EEF1A1	RAB10	RIT1	TUBB2B	RAP2B	RRAGD	LANCL2	NMUR2	RAB38	RAB5A	ARHGEF5
transcription regulatory region DNA binding (GO:0044212)	0.0790699	0.684512	74	THRB	PRDM5	BHLHE41	JMJD1C	SIX1	ASH2L	RORA	IKZF1	BRCA1	AHR	RORB	NR3C1	IKZF2	ELK3	YY1	MYC	TRIM24	TEAD1	TEAD2	GABPA	ZNF564	MYOG	MEF2A	KLF11	ZNF281	ARID5B	SOX11	PROX1	RUNX1	TOX3	SFPQ	CREB1	NR5A2	RBL1	TBL1XR1	CRY1	TFAM	ZNF831	ATF3	YAP1	KMT2A	TWIST1	FOXO3	ARNTL2	PURB	PURA
protein heterodimerization activity (GO:0046982)	0.0798993	0.684512	54	ITGB1	TOP2A	TENM1	ITGAM	BHLHE41	AHR	CXCL13	MLX	BDKRB2	TEAD1	TEAD2	GABPA	MYOG	TPD52	MEF2A	BNIP3L	RALGAPA2	CYBB	IRAK3	TIRAP	TUBB2B	RALGAPB	RRAGD	TLR6	ATF3	YAP1	GTF2A1	GTF2A2	TYRP1	SUPT4H1	ZBTB1	PDGFB	NR2C2	CLCN3	HIF1A	EGFR	SCUBE1	SNX2	ERBB3	SNX6	BARD1	ARNT2	TGFB2	KCNB1	BNIP3	TBX18
metallocarboxypeptidase activity (GO:0004181)	0.102211	0.697324	8	AGBL5	AGBL4	CPM	CPB1	FOLH1	AGTPBP1	CPD	CPE
RNA polymerase II repressing transcription factor binding (GO:0001103)	0.102211	0.697324	8	YY1	MKKS	HDAC2	BBS10	SP1	ZFP42	RBBP8	BBS7
neuropilin binding (GO:0038191)	0.106533	0.708171	6	SEMA5A	SEMA4A	SEMA3C	SEMA4C	SEMA3E	SEMA4F
dynein complex binding (GO:0070840)	0.106533	0.708171	6	CENPF	APC	TPR	BICD1	BICD2	PAFAH1B1
transmitter-gated ion channel activity (GO:0022824)	0.106387	0.708171	9	GABRA2	GABRB3	GRIA2	GABRA1	GABRB1	GRID2	GRID1	GABRA4	GABRA3
insulin receptor binding (GO:0005158)	0.106533	0.708171	6	SNX4	SNX2	IRS4	GRB10	ENPP1	PHIP
divalent inorganic cation transmembrane transporter activity (GO:0072509)	0.109048	0.720271	10	SLC30A6	SLC30A8	MMGT1	SLC30A5	SLC11A2	SLC39A6	SLC41A1	ZDHHC13	ATP2B1	SLC39A14
phospholipid transporter activity (GO:0005548)	0.111378	0.722897	12	OSBPL8	PLSCR1	TMEM30A	ATP8B3	ATP8A2	ATP8A1	ATP10D	PLSCR4	ATP11B	ATP10A	ATP9B	PITPNC1
anion:cation symporter activity (GO:0015296)	0.110615	0.722897	11	SLC13A1	SLC6A5	SLC4A7	SLC10A6	SLC20A2	SLC10A2	SLC1A1	SLC6A11	SLC6A1	SLC4A4	SLC17A2
repressing transcription factor binding (GO:0070491)	0.111537	0.722897	13	MKKS	HDAC2	CBX5	PRDM5	HMGB1	YY1	BBS10	SP1	MYC	ZFP42	RBBP8	BBS7	EIF4E
RNA polymerase II regulatory region DNA binding (GO:0001012)	0.114159	0.7353	41	THRB	SATB1	PRDM2	RORA	RORB	NR2C2	ZBTB4	PHF21A	GLI3	HOXC10	PURB	PURA	NFIL3	NHLH1	PLAGL1	TRPS1	TBX20	MLX	ALX1	RREB1	ZBED4	MYOG	MEF2A	TFAP2A	ARID5B	CDC5L	VEZF1	NR1D2	PHOX2B	RUNX1	NR4A2	NR4A1	CREB1	RBL1	TFDP1	TFDP2	SP1	SP3	REL	HOXD9	ATF3
activin-activated receptor activity (GO:0017002)	0.138645	0.744945	3	ACVR1	ACVR1C	ACVR2A
AP-2 adaptor complex binding (GO:0035612)	0.138645	0.744945	3	TBC1D5	BMP2K	AAK1
mRNA methyltransferase activity (GO:0008174)	0.138645	0.744945	3	METTL14	RNMT	CMTR2
telethonin binding (GO:0031433)	0.138645	0.744945	3	BMP10	MYOZ3	MYOZ2
1-phosphatidylinositol-4-phosphate 3-kinase activity (GO:0035005)	0.138645	0.744945	3	PIK3CB	PIK3C2A	PIK3CG
superoxide-generating NADPH oxidase activity (GO:0016175)	0.138645	0.744945	3	CYBB	NOX5	NOX1
m7G(5')pppN diphosphatase activity (GO:0050072)	0.138645	0.744945	3	NUDT3	DCP2	NUDT4
retinal dehydrogenase activity (GO:0001758)	0.138645	0.744945	3	ALDH1A3	ALDH1A2	AKR1C4
complement receptor activity (GO:0004875)	0.129488	0.744945	4	C5AR2	C5AR1	FPR3	FPR2
oxidoreductase activity, acting on NAD(P)H, quinone or similar compound as acceptor (GO:0016655)	0.117968	0.744945	5	NQO2	AKR1C2	AKR1C4	CBR4	CRYZ
microtubule-severing ATPase activity (GO:0008568)	0.129488	0.744945	4	KATNAL1	KATNAL2	FIGNL1	VPS4A
mRNA 3'-UTR AU-rich region binding (GO:0035925)	0.129488	0.744945	4	ZFP36	CPEB3	CPEB2	ZFP36L2
ribosomal large subunit binding (GO:0043023)	0.129488	0.744945	4	CPSF6	DHX33	MALSU1	CPEB2
2 iron, 2 sulfur cluster binding (GO:0051537)	0.129488	0.744945	4	ISCA2	RFESD	FDX1	CISD2
phosphatidylinositol-3,5-bisphosphate phosphatase activity (GO:0106018)	0.117968	0.744945	5	PIKFYVE	MTMR8	MTMR9	SYNJ2	MTMR7
NMDA glutamate receptor activity (GO:0004972)	0.138645	0.744945	3	GRIN2A	GRIN3A	GRIN2B
poly-purine tract binding (GO:0070717)	0.128889	0.744945	6	KHDRBS1	TIA1	ATXN1	PABPC1	LARP4	ZC3H14
mannose binding (GO:0005537)	0.129488	0.744945	4	LMAN1	COLEC10	LMAN2L	MBL2
transcription cofactor binding (GO:0001221)	0.135257	0.744945	7	CCNT2	PER3	RORA	AHR	TEAD1	ESR1	TEAD2
ubiquitin conjugating enzyme activity (GO:0061631)	0.128889	0.744945	6	UBE2R2	UBE2D1	UBE2QL1	UBE2E2	UBE2A	UBE2G2
dynactin binding (GO:0034452)	0.129488	0.744945	4	BICD1	BICD2	PAFAH1B1	SNX6
myosin V binding (GO:0031489)	0.117968	0.744945	5	RAB3B	RAB10	RAB39B	RAB27B	RAB6A
N-acyltransferase activity (GO:0016410)	0.135257	0.744945	7	SMARCE1	NAA50	CERS3	CERS4	CERS6	ESCO1	ESCO2
epidermal growth factor receptor binding (GO:0005154)	0.135257	0.744945	7	SNX4	PLSCR1	FER	EFEMP1	SNX2	AGR2	FAM83B
enhancer sequence-specific DNA binding (GO:0001158)	0.122452	0.744945	15	SMARCE1	SMARCC1	HDAC2	NFYA	SOX11	BACH1	YY1	SFPQ	CREB1	NR5A2	RBBP4	ZNF704	ZFP42	REL	SLC2A4RG
ubiquitin-like protein-specific protease activity (GO:0019783)	0.119362	0.744945	17	USP13	USP24	USP46	USP25	USP15	WDR48	USP16	USP49	USP44	OTUD7B	TNFAIP3	UCHL3	MYSM1	SENP1	SENP6	OTUD6B	OTUD3
transforming growth factor beta receptor binding (GO:0005160)	0.125219	0.744945	11	BMP4	SMAD2	GDF11	TGFB2	BMP10	USP15	BAMBI	INHBA	GDF5	BMP5	TGFBR2
guanyl ribonucleotide binding (GO:0032561)	0.124456	0.744945	35	RAB3B	TUBAL3	RASEF	GNAI3	ARL1	RHOBTB3	RND2	RND3	RAB22A	GNAI1	RHOT1	SEPHS1	RAB6A	RAB2A	RAB4A	TUBB	INSR	RAB39A	RHOH	RAB27A	RAB27B	NME1	EEF1A1	RAB10	RIT1	TUBB2B	RAP2B	PDE10A	RRAGD	LANCL2	NMUR2	PDE5A	RAB38	RAB5A	ARHGEF5
mitogen-activated protein kinase kinase binding (GO:0031434)	0.135024	0.744945	15	DDR1	EPHA6	MUSK	RYK	INSR	EGFR	ERBB3	ROR1	TEK	ROR2	MET	EPHB1	ROS1	EPHB4	EPHB3
purine ribonucleoside binding (GO:0032550)	0.122882	0.744945	33	RAB3B	TUBAL3	RASEF	GNAI3	ARL1	RHOBTB3	RND2	RND3	RAB22A	GNAI1	RHOT1	SEPHS1	RAB6A	RAB2A	RAB4A	TUBB	INSR	RAB39A	RHOH	RAB27A	RAB27B	NME1	EEF1A1	RAB10	RIT1	TUBB2B	RAP2B	RRAGD	LANCL2	NMUR2	RAB38	RAB5A	ARHGEF5
calcium ion binding (GO:0005509)	0.119727	0.744945	56	C2CD5	MCTP1	CIB4	ATP2A2	EFCAB6	PKD2	CDH8	SLC8A1	CDH7	PCLO	DNER	ENPP1	PSPH	MBL2	TPD52	ASPN	PLSCR1	TMEM2	STIM2	CDH11	PLSCR4	RAPGEF2	DSG1	FKBP9	SLC25A12	ASTN2	MCTP2	CDH18	CDH19	CRP	SLC24A2	NRXN1	CABP4	ITLN1	C2CD4A	THBS4	CAMKK2	HSP90B1	PPP3R1	SCUBE1	S100A16	BNIP2	PCDHA4	SLIT3	DUOX2	PCDHA7
GTPase regulator activity (GO:0030695)	0.131501	0.744945	54	FAM13B	IPO7	PREX2	RGS4	RGS5	RGS2	OPHN1	TBC1D30	APPL1	USP6	RALGAPA2	ELMOD2	RHOH	TBC1D9	TBC1D2B	TBC1D1	ACAP2	RALGAPB	RASA4	TBC1D5	RAPGEF2	SOS1	LLGL1	ARHGEF6	RGS18	RGS17	RGS13	RAP1GDS1	RASAL2	ASAP2	IQGAP2	ARHGAP12	ARHGAP20	CHN1	KRIT1	BNIP2	STXBP5	SRGAP3	SRGAP2	TBC1D8B	RABGAP1L	RANBP3	ARHGAP29	ARHGAP26	MYO9A	ARHGAP23
single-stranded RNA binding (GO:0003727)	0.140831	0.752793	11	ZFP36	MEX3B	AGO3	AGO1	POLR2D	SUPT4H1	IFIT5	TLR8	ADARB2	HNRNPA1	UHMK1
GTPase activator activity (GO:0005096)	0.141678	0.753434	49	FAM13B	PREX2	RGS4	RGS5	RGS2	OPHN1	TBC1D30	APPL1	USP6	RALGAPA2	ELMOD2	TBC1D9	TBC1D2B	TBC1D1	ACAP2	RALGAPB	RASA4	TBC1D5	RAPGEF2	SOS1	LLGL1	ARHGEF6	RGS18	RGS17	RGS13	RAP1GDS1	RASAL2	ASAP2	ARHGAP12	ARHGAP20	CHN1	BNIP2	STXBP5	SRGAP3	SRGAP2	TBC1D8B	RABGAP1L	RANBP3	ARHGAP29	ARHGAP26	MYO9A	ARHGAP23	STXBP5L	TBCK	ARHGAP32	DLC1
phosphatidic acid binding (GO:0070300)	0.14505	0.766433	5	SESTD1	MAPKAP1	RAPGEF2	PITPNC1	MARK1
sodium ion transmembrane transporter activity (GO:0015081)	0.1456	0.766433	16	SLC24A2	SLC13A1	SLC20A2	SLC12A1	SLC41A1	ATP1B4	ATP1A2	ABCB11	SLC4A4	NALCN	SLC8A1	SLC9C2	SLC9B2	SLC4A7	SLC9A4	SLC17A2
Ras GTPase binding (GO:0017016)	0.148603	0.77829	37	MAPKAP1	RHOBTB3	CHM	IQGAP2	BICD1	YBX3	BICD2	RABGEF1	AKAP13	XPO4	KIF3A	TBC1D30	STXBP5	CHML	RAB11FIP2	EXPH5	UNC13B	TBC1D8B	NSF	RABGAP1L	RANBP3	USP6	EXOC8	PIFO	RHOH	TBC1D9	TBC1D2B	STXBP5L	TBCK	TBC1D1	SIKE1	TBC1D5	RAB3GAP2	BIRC5	ULK1	OPTN	LLGL1
TBP-class protein binding (GO:0017025)	0.153284	0.779372	6	GTF2A1	GTF2A2	TAF1B	PSMC4	AHR	ESR1
AU-rich element binding (GO:0017091)	0.153284	0.779372	6	NUDT21	ZFP36	CPEB3	CPEB2	ZFP36L2	HNRNPA0
ubiquitin-like protein conjugating enzyme activity (GO:0061650)	0.153284	0.779372	6	UBE2R2	UBE2D1	UBE2QL1	UBE2E2	UBE2A	UBE2G2
nuclear hormone receptor binding (GO:0035257)	0.153319	0.779372	13	NCOA1	NCOA2	PRMT2	JMJD1C	MED4	HIF1A	MED13	ANKAR	NRIP1	CRY1	TRIP12	NCOA7	HMGN3
chloride transmembrane transporter activity (GO:0015108)	0.153319	0.779372	13	GABRA2	GABRB2	GABRA1	CLIC5	GABRA4	GABRA3	SLC1A1	CLCN3	CLCN5	CLCN4	BSND	SLC26A7	SLC26A9
Rab GTPase binding (GO:0017137)	0.151606	0.779372	27	RHOBTB3	CHM	BICD1	BICD2	RABGEF1	KIF3A	TBC1D30	STXBP5	CHML	RAB11FIP2	EXPH5	UNC13B	TBC1D8B	NSF	RABGAP1L	USP6	PIFO	TBC1D9	TBC1D2B	STXBP5L	TBCK	TBC1D1	TBC1D5	RAB3GAP2	ULK1	OPTN	LLGL1
oxidoreductase activity, acting on paired donors, with incorporation or reduction of molecular oxygen, NAD(P)H as one donor, and incorporation of one atom of oxygen (GO:0016709)	0.158834	0.803181	10	CYP26B1	MICAL2	AKR1C2	FMO2	FMO3	AKR1C4	CYP4F11	FMO5	CYP8B1	CYP4F12
snRNA binding (GO:0017069)	0.159569	0.803181	9	CCNT2	SART3	LSM11	CCNT1	NCBP2	SNRPB2	SNRPD3	RNPC3	RBM22
regulatory region DNA binding (GO:0000975)	0.160326	0.803181	44	YAP1	KMT2A	PRDM5	SIX1	ASH2L	IKZF1	BRCA1	AHR	IKZF2	YY1	DHX36	HIVEP1	HIVEP3	HIVEP2	BRD7	TEAD1	RREB1	TEAD2	GABPA	ZNF564	MEF2A	TFAP2A	KLF11	BCL11B	NFYA	ZNF281	ARID5B	HMGA2	CDC5L	PROX1	GRHL1	TRERF1	SMARCA2	RUNX1	SFPQ	NR5A2	TBL1XR1	SP1	ZNF217	ZNF536	ZNF831	ZNF532	ATF3	RCOR1
protein-arginine N-methyltransferase activity (GO:0016274)	0.16327	0.806241	4	PRMT6	PRMT2	FBXO11	WDR77
microtubule plus-end binding (GO:0051010)	0.16327	0.806241	4	DST	APC	TTBK2	CLASP2
phosphatidylinositol-3,5-bisphosphate 3-phosphatase activity (GO:0052629)	0.16327	0.806241	4	MTMR8	MTMR9	SYNJ2	MTMR7
aryl hydrocarbon receptor binding (GO:0017162)	0.183011	0.811035	3	NCOA1	NCOA2	ARNT2
protein phosphatase activator activity (GO:0072542)	0.183011	0.811035	3	CALM3	CALM1	PHACTR4
sulfurtransferase activity (GO:0016783)	0.183011	0.811035	3	NFS1	URM1	MBIP
protein kinase B binding (GO:0043422)	0.183011	0.811035	3	TRAF6	PDE3B	APPL1
C-C chemokine binding (GO:0019957)	0.183011	0.811035	3	ZFP36	CXCR4	CCR7
dipeptidyl-peptidase activity (GO:0008239)	0.183011	0.811035	3	FAP	PRSS16	PRCP
cyclic nucleotide-dependent protein kinase activity (GO:0004690)	0.183011	0.811035	3	PRKAA1	PRKACB	PRKG1
CXCR chemokine receptor binding (GO:0045236)	0.174495	0.811035	5	CXCL10	CXCL6	PPBP	CXCL13	CXCL5
tRNA (cytosine) methyltransferase activity (GO:0016427)	0.183011	0.811035	3	NSUN3	METTL8	TRDMT1
Notch binding (GO:0005112)	0.174495	0.811035	5	ADAM17	NOV	AAK1	HIF1AN	DLL1
CTD phosphatase activity (GO:0008420)	0.183011	0.811035	3	CTDSP2	SSU72	RPAP2
organic acid transmembrane transporter activity (GO:0005342)	0.174495	0.811035	5	SLC2A9	SLC10A6	SLC10A2	SLC5A12	SLC22A9
histone demethylase activity (H3-K4 specific) (GO:0032453)	0.183011	0.811035	3	KDM5A	KDM5B	KDM1B
ligand-dependent nuclear receptor binding (GO:0016922)	0.174495	0.811035	5	SMARCE1	NCOA1	NCOA2	PROX1	PPARGC1A
bioactive lipid receptor activity (GO:0045125)	0.183011	0.811035	3	S1PR1	LPAR1	S1PR2
core promoter proximal region DNA binding (GO:0001159)	0.179532	0.811035	6	YY1	TFAP2A	TFCP2	SP1	SP3	TEAD1
N-acetyltransferase activity (GO:0008080)	0.179532	0.811035	6	SMARCE1	NAA50	KAT2B	NAT1	ESCO1	ESCO2
RNA polymerase II core promoter sequence-specific DNA binding (GO:0000979)	0.181265	0.811035	7	TFAP2A	POU2F1	PAX6	SOX11	PRDM10	RREB1	ZNF277
basal RNA polymerase II transcription machinery binding (GO:0001099)	0.181265	0.811035	7	AGO1	SMYD2	SUPT4H1	ELP2	ZNF326	ELP4	LLPH
RNA polymerase II distal enhancer sequence-specific DNA binding (GO:0000980)	0.171995	0.811035	12	SMARCE1	YY1	SFPQ	SMARCC1	HDAC2	CREB1	NR5A2	RBBP4	NFYA	ZFP42	REL	BACH1
ATPase activity, coupled (GO:0042623)	0.169116	0.811035	20	TOP2A	DDX17	HSPA5	MYO10	HSPA4L	VPS4A	TTF2	HSPA2	SMARCA2	CLPX	RBBP4	KATNAL1	PSMC4	MSH3	KATNAL2	FIGNL1	DHX36	YME1L1	ERCC6	MYH10
protein deacetylase activity (GO:0033558)	0.177559	0.811035	10	HDAC2	RBBP4	SIN3B	SAP30L	BRMS1L	SIRT5	HDAC8	MTA3	PHF21A	RCOR1
histone acetyltransferase binding (GO:0035035)	0.179532	0.811035	6	MEF2A	EID1	PAX6	KANSL1L	HIF1A	GLI3
transcription corepressor activity (GO:0003714)	0.169065	0.811035	40	YAP1	KDM5B	THRB	BHLHE41	UBP1	TFCP2L1	YBX3	ELK3	MECP2	YY1	SIN3B	NFIL3	NRIP1	ZNF85	RBBP8	ALX1	BRD7	JUNB	SCAI	TRIM22	ZNF366	RUNX1T1	CBX4	SFMBT1	ZNF281	PAWR	CDYL	PROX1	TBX18	PIAS1	EID1	HEYL	TBL1XR1	COPS2	TFEC	RLIM	SRSF2	MXD1	ATF3	RCOR1
histone deacetylase binding (GO:0042826)	0.191593	0.841872	18	MEF2A	TOP2A	HDAC2	BHLHE41	GLI3	HOXA10	NUDT21	KAT2B	SFPQ	NIPBL	RBBP4	KCTD21	SP1	TRAF6	BRMS1L	DHX36	UHRF1BP1	DACT1
sequence-specific double-stranded DNA binding (GO:1990837)	0.191279	0.841872	23	IVNS1ABP	MEF2A	TFAP2A	KDM5B	THRB	KMT2A	JMJD1C	HMGA2	RORA	SOX11	NR1D2	RORB	TBX18	ELK3	PURB	PURA	SFPQ	NR5A2	PER3	ORC6	DHX33	ORC2	ATF3
organic acid:sodium symporter activity (GO:0005343)	0.199781	0.85964	4	SLC38A1	SLC10A6	SLC10A2	SLC5A12
insulin-like growth factor I binding (GO:0031994)	0.199781	0.85964	4	INSR	ITGB3	ITGAV	ITGA6
ionotropic glutamate receptor binding (GO:0035255)	0.199781	0.85964	4	NSF	DLG2	GNAS	SHANK2
RNA stem-loop binding (GO:0035613)	0.199781	0.85964	4	RC3H1	SNRPB2	CPEB3	MYH10
tRNA methyltransferase activity (GO:0008175)	0.199781	0.85964	4	KIAA1456	THUMPD3	TRDMT1	ALKBH8
disordered domain specific binding (GO:0097718)	0.207417	0.867305	6	SMAD2	PPIL1	CALM3	HSPA2	CALM1	TEAD2
calcium activated cation channel activity (GO:0005227)	0.207417	0.867305	6	KCNMB1	HPN	KCNMB2	ANO6	TMEM38A	TMEM38B
lysine-acetylated histone binding (GO:0070577)	0.205969	0.867305	5	KMT2A	TRIM24	PHIP	MLLT3	BRD7
acetylation-dependent protein binding (GO:0140033)	0.205969	0.867305	5	KMT2A	TRIM24	PHIP	MLLT3	BRD7
palmitoyltransferase activity (GO:0016409)	0.206418	0.867305	7	ZDHHC20	ZDHHC5	ZDHHC13	ZDHHC21	ZDHHC2	ZDHHC14	ZDHHC15
SUMO transferase activity (GO:0019789)	0.205969	0.867305	5	CBX4	KIAA1586	NSMCE2	PIAS2	PIAS1
nuclear localization sequence binding (GO:0008139)	0.206418	0.867305	7	BRAP	NPAP1	KPNA4	TNPO1	RANBP6	TNPO3	KPNB1
ligand-dependent nuclear receptor transcription coactivator activity (GO:0030374)	0.213739	0.890152	14	NCOA1	NCOA2	THRB	ACTN1	RORA	NR1D2	RORB	MED4	FGF2	TRERF1	WDR77	MED13	NCOA7	PPARGC1A
siRNA binding (GO:0035197)	0.230434	0.921444	3	FAM172A	DICER1	TARBP2
chloride channel inhibitor activity (GO:0019869)	0.230434	0.921444	3	STX7	WNK3	VTI1B
serine-type exopeptidase activity (GO:0070008)	0.230434	0.921444	3	CPM	CPE	PRCP
UDP-xylosyltransferase activity (GO:0035252)	0.230434	0.921444	3	GXYLT1	XYLT1	GXYLT2
serine-type carboxypeptidase activity (GO:0004185)	0.230434	0.921444	3	CPM	CPE	PRCP
signal sequence binding (GO:0005048)	0.223054	0.921444	9	BRAP	NPAP1	PEX5L	KPNA4	AP2B1	TNPO1	RANBP6	TNPO3	KPNB1
carboxypeptidase activity (GO:0004180)	0.223054	0.921444	9	AGBL5	AGBL4	CPM	CPB1	FOLH1	AGTPBP1	CPD	CPE	PRCP
peptide disulfide oxidoreductase activity (GO:0015037)	0.230434	0.921444	3	TXNDC12	GLRX	GLRX2
RNA polymerase core enzyme binding (GO:0043175)	0.228111	0.921444	8	SCAF8	AGO1	SMYD2	SUPT4H1	ELP2	ZNF326	ELP4	SPTY2D1
Toll-like receptor binding (GO:0035325)	0.230434	0.921444	3	CD36	TLR6	TIRAP
secondary active transmembrane transporter activity (GO:0015291)	0.231027	0.921444	14	SLC20A2	SLC5A12	SLCO5A1	SLC5A3	SLC25A16	SLC7A6	CLCN5	CLCN4	ANKH	SLCO1B3	SLCO1A2	SLC16A7	MCU	SLC22A9
acetylglucosaminyltransferase activity (GO:0008375)	0.232528	0.923876	11	MGAT4C	EXT2	EXTL2	MGAT5	MGAT4A	PIGP	GCNT1	GCNT2	ALG13	B3GALT6	B3GALT5
acid-amino acid ligase activity (GO:0016881)	0.238415	0.932583	4	GCLC	PPCS	GCLM	PAICS
insulin-like growth factor binding (GO:0005520)	0.238415	0.932583	4	INSR	ITGB3	ITGAV	ITGA6
ATPase coupled ion transmembrane transporter activity (GO:0042625)	0.236701	0.932583	6	ATP8A1	ATP2B4	ATP2B2	ABCC9	ATP2B1	ATP13A3
RNA polymerase binding (GO:0070063)	0.239114	0.932583	5	ZFP36	SCAF8	CCNT2	CCNT1	BRCA1
exopeptidase activity (GO:0008238)	0.239216	0.932583	10	CPM	PM20D2	CPB1	FOLH1	MME	TPP2	CPE	LNPEP	TRHDE	METAP1
sodium channel activity (GO:0005272)	0.246093	0.945179	9	HCN4	CATSPER2	SCN7A	PKD2	SCN2A	SCN3A	NALCN	SCN1A	HCN1
histone deacetylase activity (GO:0004407)	0.246093	0.945179	9	HDAC2	RBBP4	SIN3B	SAP30L	BRMS1L	HDAC8	MTA3	PHF21A	RCOR1
DNA helicase activity (GO:0003678)	0.246093	0.945179	9	GINS1	GINS4	ATRX	MCM4	MCM6	DNA2	CHD2	CHD1	RAD54B
phosphoric ester hydrolase activity (GO:0042578)	0.245444	0.945179	12	PPP1CB	PPP1CC	PGAP1	DUSP3	UBASH3B	SACM1L	EPHX2	DUSP28	PTPN22	DUSP18	MPPE1	PSPH
translation factor activity, RNA binding (GO:0008135)	0.248862	0.952286	14	GFM1	EIF1AX	SOX11	EEF1A1	EIF3M	EIF2S3	EIF3H	DENR	ETF1	EIF3F	CPEB3	EIF4E	CPEB2	CPEB4
cyclic-nucleotide phosphodiesterase activity (GO:0004112)	0.279717	0.976657	3	PDE10A	PDE3B	PDE5A
oxidoreductase activity, acting on the CH-NH2 group of donors, oxygen as acceptor (GO:0016641)	0.278564	0.976657	4	VCAM1	MAOA	NUGGC	LOXL2
tau-protein kinase activity (GO:0050321)	0.279717	0.976657	3	PHKG2	MARK1	TTBK2
poly-pyrimidine tract binding (GO:0008187)	0.27356	0.976657	5	KHDRBS1	ATXN1	IFIT5	PABPC1	UHMK1
adenylate cyclase binding (GO:0008179)	0.279717	0.976657	3	CALM3	AKAP6	CALM1
proteasome binding (GO:0070628)	0.27356	0.976657	5	USP13	UBL4A	UBD	PSMG1	UCHL5
K63-linked polyubiquitin modification-dependent protein binding (GO:0070530)	0.27356	0.976657	5	ZBTB1	SPRTN	OTUD7B	TNFAIP3	OPTN
inhibitory extracellular ligand-gated ion channel activity (GO:0005237)	0.278564	0.976657	4	GABRA2	GABRA1	GABRA4	GABRA3
carbon-nitrogen ligase activity, with glutamine as amido-N-donor (GO:0016884)	0.279717	0.976657	3	GMPS	GATC	QRSL1
syntaxin-1 binding (GO:0017075)	0.278564	0.976657	4	UNC13B	NSF	UNC13C	STXBP5
phosphatidylinositol phosphate kinase activity (GO:0016307)	0.278564	0.976657	4	PIKFYVE	PIK3CB	PIK3C2A	PIK3CG
glutamate receptor binding (GO:0035254)	0.27356	0.976657	5	NSF	DLG2	HOMER2	GNAS	SHANK2
metal ion transmembrane transporter activity (GO:0046873)	0.267135	0.976657	6	MMGT1	SLC12A1	SLC11A2	SLC41A1	ZDHHC13	ATP2B1
oxidoreductase activity, acting on the aldehyde or oxo group of donors, NAD or NADP as acceptor (GO:0016620)	0.267135	0.976657	6	ALDH1A3	ALDH6A1	ALDH5A1	ALDH1A2	AKR1C4	ALDH7A1
protein phosphatase 2A binding (GO:0051721)	0.27356	0.976657	5	ANKLE2	GRIN3A	STRN	ARPP19	FOXO1
intramolecular oxidoreductase activity, transposing S-S bonds (GO:0016864)	0.27356	0.976657	5	ERP44	TMX4	TMX3	ITGB3	GLRX2
protein disulfide isomerase activity (GO:0003756)	0.27356	0.976657	5	ERP44	TMX4	TMX3	ITGB3	GLRX2
pre-mRNA binding (GO:0036002)	0.26019	0.976657	7	TRA2B	RNPC3	HNRNPA1	SLU7	TARBP2	UHMK1	RBM22
neurexin family protein binding (GO:0042043)	0.279717	0.976657	3	NLGN1	NLGN2	CPE
actin monomer binding (GO:0003785)	0.267135	0.976657	6	LIMA1	COBLL1	COBL	MTSS1	PFN2	LMOD2
small protein activating enzyme activity (GO:0008641)	0.279717	0.976657	3	UBA6	UBA5	UBA2
magnesium ion transmembrane transporter activity (GO:0015095)	0.279717	0.976657	3	MMGT1	SLC41A1	ZDHHC13
phosphatidylinositol-5-phosphate binding (GO:0010314)	0.279717	0.976657	3	SESTD1	SAP30L	LANCL2
protein tyrosine phosphatase activity (GO:0004725)	0.256914	0.976657	13	PTPRN2	DUSP3	EYA1	EYA4	PTPN22	DUSP18	PTPN13	PTPN14	PTPRG	PTPRZ1	UBASH3B	PTPN5	PTPN2
death domain binding (GO:0070513)	0.279717	0.976657	3	DAP	BCL2	RIPK1
Tat protein binding (GO:0030957)	0.279717	0.976657	3	MDFIC	TRIM32	DLL1
phospholipid scramblase activity (GO:0017128)	0.335925	0.984051	2	PLSCR1	PLSCR4
G-quadruplex RNA binding (GO:0002151)	0.335925	0.984051	2	DHX36	AFF2
manganese ion transmembrane transporter activity (GO:0005384)	0.335925	0.984051	2	SLC11A2	ATP2C1
alpha-N-acetylneuraminate alpha-2,8-sialyltransferase activity (GO:0003828)	0.335925	0.984051	2	ST8SIA1	ST8SIA2
protein-lysine 6-oxidase activity (GO:0004720)	0.335925	0.984051	2	NUGGC	LOXL2
cAMP-dependent protein kinase activity (GO:0004691)	0.335925	0.984051	2	PRKAA1	PRKACB
xylosyltransferase activity (GO:0042285)	0.335925	0.984051	2	GXYLT1	GXYLT2
peroxisome proliferator activated receptor binding (GO:0042975)	0.335925	0.984051	2	PRMT2	ASXL2
ketosteroid monooxygenase activity (GO:0047086)	0.335925	0.984051	2	AKR1C2	AKR1C4
hydroxymethyl-, formyl- and related transferase activity (GO:0016742)	0.335925	0.984051	2	ATIC	GART
transforming growth factor beta-activated receptor activity (GO:0005024)	0.335925	0.984051	2	LTBP1	TGFBR2
ubiquitin-dependent protein binding (GO:0140036)	0.335925	0.984051	2	USP15	IDE
7SK snRNA binding (GO:0097322)	0.335925	0.984051	2	CCNT2	CCNT1
bile acid:sodium symporter activity (GO:0008508)	0.335925	0.984051	2	SLC10A6	SLC10A2
nucleotide diphosphatase activity (GO:0004551)	0.329794	0.984051	3	ENPP1	NUDT3	NUDT4
inositol 1,4,5 trisphosphate binding (GO:0070679)	0.329794	0.984051	3	TRPC3	TRPC4	TRPC1
protein phosphatase 2B binding (GO:0030346)	0.335925	0.984051	2	ATP2B4	MYOZ2
calcium channel regulator activity (GO:0005246)	0.298461	0.984051	6	STIM2	NRXN1	SGK3	CALM1	SGK2	PRKG1
protein phosphatase 1 binding (GO:0008157)	0.329794	0.984051	3	SH3RF2	AKAP11	PHACTR4
gap junction channel activity (GO:0005243)	0.329794	0.984051	3	GJD2	GJA1	GJA9
inositol trisphosphate kinase activity (GO:0051766)	0.335925	0.984051	2	IPMK	CALM1
cation:amino acid symporter activity (GO:0005416)	0.335925	0.984051	2	SLC38A1	SLC36A2
Lys63-specific deubiquitinase activity (GO:0061578)	0.329794	0.984051	3	OTUD4	TNFAIP3	STAMBP
poly(U) RNA binding (GO:0008266)	0.319645	0.984051	4	KHDRBS1	ATXN1	IFIT5	PABPC1
N-methyltransferase activity (GO:0008170)	0.308935	0.984051	5	NNMT	RNMT	SMYD2	HNMT	METTL15
aspartic endopeptidase activity, intramembrane cleaving (GO:0042500)	0.335925	0.984051	2	SPPL2A	PSEN1
3',5'-cyclic-GMP phosphodiesterase activity (GO:0047555)	0.329794	0.984051	3	PDE10A	PDE3B	PDE5A
tumor necrosis factor receptor superfamily binding (GO:0032813)	0.298461	0.984051	6	TNFSF4	TRAF6	TRIM37	RIPK1	TRAF1	MYD88
calmodulin-dependent protein kinase activity (GO:0004683)	0.330423	0.984051	6	CAMK1D	CAMK4	PHKG2	PHKB	CAMK2G	CAMKK2
transition metal ion transmembrane transporter activity (GO:0046915)	0.317347	0.984051	7	SLC30A6	SLC30A8	SLC31A1	SLC30A5	SLC11A2	SLC39A6	SLC39A14
acylglycerol lipase activity (GO:0047372)	0.329794	0.984051	3	DAGLA	ABHD2	MGLL
androgen receptor binding (GO:0050681)	0.294331	0.984051	9	NCOA1	GRIP1	PRMT2	NRIP1	BRCA1	PPARGC1A	PIAS2	FOXP1	PIAS1
aspartic-type endopeptidase activity (GO:0004190)	0.308935	0.984051	5	DDI2	SPPL2A	KCTD11	PSEN1	ASPRV1
chromo shadow domain binding (GO:0070087)	0.335925	0.984051	2	NIPBL	ATRX
primary amine oxidase activity (GO:0008131)	0.335925	0.984051	2	VCAM1	MAOA
ionotropic glutamate receptor activity (GO:0004970)	0.319645	0.984051	4	GRIA2	GRIN2A	GRIN3A	GRIN2B
1-phosphatidylinositol-3-kinase activity (GO:0016303)	0.319295	0.984051	9	FGF9	GAB1	FRS2	PIK3C3	PIK3CB	PIK3C2A	FGF2	PIK3CG	FGF10
tumor necrosis factor receptor binding (GO:0005164)	0.329794	0.984051	3	TRAF6	TRIM37	TRAF1
thyroid hormone receptor binding (GO:0046966)	0.298461	0.984051	6	MED13	PRMT2	JMJD1C	TRIP12	MED4	HMGN3
ubiquitin-specific protease binding (GO:1990381)	0.319645	0.984051	3	SART3	SYVN1	2019-03-06	DZIP3
ATP-dependent microtubule motor activity, plus-end-directed (GO:0008574)	0.28844	0.984051	7	KIF5C	KIF3A	KIF5B	KIF14	KIF1C	KIF11	DYNLL2
metalloexopeptidase activity (GO:0008235)	0.318475	0.984051	11	AGBL5	AGBL4	CPM	CPB1	FOLH1	AGTPBP1	CPD	CPE	LNPEP	TRHDE	METAP1
cation transmembrane transporter activity (GO:0008324)	0.290147	0.984051	19	CATSPER2	SLC36A2	ATP8A1	MMGT1	TRPC1	SLC1A1	ATP2B4	ATP2B2	ATP2B1	NALCN	PIEZO2	SCN7A	ATP13A3	RHCG	SCN2A	SCN3A	SLC36A4	TRPM3	SCN1A
DNA ligase (ATP) activity (GO:0003910)	0.335925	0.984051	2	LIG4	LIG3
enhancer binding (GO:0035326)	0.298461	0.984051	6	YY1	SMAD2	ZNF704	SOX11	AHR	SLC2A4RG
glucosyltransferase activity (GO:0046527)	0.335925	0.984051	2	ALG6	KDELC2
single-stranded DNA binding (GO:0003697)	0.309962	0.984051	17	TSNAX	RPA1	RTF1	HMGB1	WBP11	TSN	PURB	PURA	HNRNPK	MSH3	FUBP1	DHX36	POLR2D	NUP35	NABP1	SSBP2	HNRNPA1
transmembrane receptor protein serine/threonine kinase binding (GO:0070696)	0.319645	0.984051	4	BMP4	TGFB2	TDGF1	BMP5
transcription factor activity, RNA polymerase II distal enhancer sequence-specific binding (GO:0003705)	0.296078	0.984051	13	MYOG	MEF2A	BHLHE41	PROX1	HIF1A	PURA	CREB1	NR5A2	REL	HIVEP1	IRF8	ZNF831	VGLL2
RNA polymerase II transcription factor binding (GO:0001085)	0.313571	0.984051	23	MEF2A	EOMES	MKKS	HDAC2	BEX1	IFRD1	BHLHE41	ELK1	MTDH	YY1	BBS10	CREB1	RBL1	SP1	TRPS1	ZFP42	TBX20	RBBP8	BBS7	TEAD1	PITX1	TEAD2	DACT1
GTPase activity (GO:0003924)	0.297383	0.984051	41	RAB3B	HBS1L	RAB1A	GFM1	ATL3	GNAI3	ARL1	RHOBTB3	RND2	RND3	RAB22A	GNAI1	GSPT1	NUGGC	RAB44	RAB40A	RHOT1	RAB23	MFN2	RAB6A	RAB2A	RAB4A	RAB39A	RHOH	RAB27A	RAB39B	RAB27B	GPN2	RAB33B	DNM3	EEF1A1	RAB10	RIT1	RAB30	GNL3L	RAB37	GNAQ	RRAGD	GNAS	RAB38	RAB5A
polynucleotide adenylyltransferase activity (GO:0004652)	0.335925	0.984051	2	PAPD4	PAPOLB
phosphatidylinositol phosphate phosphatase activity (GO:0052866)	0.335925	0.984051	2	SACM1L	SYNJ2
RNA polymerase II core binding (GO:0000993)	0.298461	0.984051	6	AGO1	SMYD2	SUPT4H1	ELP2	ZNF326	ELP4
calcium channel activity (GO:0005262)	0.316653	0.984051	18	SLC24A2	CATSPER2	TRPC3	TRPC4	TRPC1	PSEN1	PKD2	NALCN	TMCO1	CACNB2	CACNG8	STIM2	IL1RAPL1	ITGAV	TRPM7	TRPM6	TRPM3	MCU
phosphatidylinositol-4,5-bisphosphate binding (GO:0005546)	0.328204	0.984051	12	AMER2	SNX18	SESTD1	FRMPD4	MAPKAP1	TTPA	ALOX15	KRIT1	TIRAP	KCNJ2	MARK1	PFN2
actin binding (GO:0003779)	0.332707	0.984051	46	ITGB1	PLEKHH2	WIPF1	SYNPO2	WIPF2	CXCR4	NEXN	IQGAP2	ANTXR1	EGFR	CORO1C	LMOD2	LIMA1	ALKBH4	COBLL1	CFL2	MYO18A	FLNB	MYOZ3	PDLIM5	MYOZ2	MYH10	PHACTR4	ACTR3	MYBPC1	MYO10	NEBL	TPM3	ACTN1	RDX	DSTN	MICAL2	PAWR	COBL	PARVA	SSH2	SHROOM4	MTSS1	SSH1	CACNB2	ANLN	ARPC2	MSRB2	ANG	VCL	PFN2
cAMP-dependent protein kinase regulator activity (GO:0008603)	0.401685	0.990187	2	CXCL10	PRKAR1A
histone serine kinase activity (GO:0035174)	0.401685	0.990187	2	PRKAA1	PRKAA2
mannosidase activity (GO:0015923)	0.401685	0.990187	2	MAN2B2	MAN2A1
cAMP response element binding (GO:0035497)	0.401685	0.990187	2	CREB1	HMGA2
ephrin receptor activity (GO:0005003)	0.361117	0.990187	4	EPHA6	EPHB1	EPHB4	EPHB3
chloride ion binding (GO:0031404)	0.401685	0.990187	2	NQO2	TDG
metalloendopeptidase inhibitor activity (GO:0008191)	0.379751	0.990187	3	COL4A3	SPOCK3	TIMP2
interleukin-6 receptor binding (GO:0005138)	0.401685	0.990187	2	ADAM17	CNTF
alanine transmembrane transporter activity (GO:0022858)	0.401685	0.990187	2	SLC36A2	SLC36A4
DNA ligase activity (GO:0003909)	0.401685	0.990187	2	LIG4	LIG3
sodium:bicarbonate symporter activity (GO:0008510)	0.464163	0.990187	2	SLC4A7	SLC4A4
AT DNA binding (GO:0003680)	0.401685	0.990187	2	KMT2A	HMGA2
G-protein beta/gamma-subunit complex binding (GO:0031683)	0.361117	0.990187	4	GNAQ	GNAS	GNAI3	GNAI1
RNA polymerase I activity (GO:0001054)	0.379751	0.990187	3	POLR1B	TWISTNB	POLR2F
zinc ion transmembrane transporter activity (GO:0005385)	0.34488	0.990187	5	SLC30A6	SLC30A8	SLC30A5	SLC39A6	SLC39A14
oxidoreductase activity, acting on a sulfur group of donors, NAD(P) as acceptor (GO:0016668)	0.464163	0.990187	2	PRDX3	PGK1
phosphatidylinositol-4,5-bisphosphate 5-phosphatase activity (GO:0004439)	0.464163	0.990187	2	INPP5E	SYNJ2
G-protein coupled purinergic nucleotide receptor activity (GO:0045028)	0.464163	0.990187	2	P2RY14	P2RY1
primary miRNA binding (GO:0070878)	0.401685	0.990187	2	SMAD2	DROSHA
BMP receptor binding (GO:0070700)	0.379751	0.990187	3	BMP4	TGFB2	BMP5
fatty acid elongase activity (GO:0009922)	0.401685	0.990187	2	ELOVL2	ELOVL6
phosphatidylinositol phosphate 5-phosphatase activity (GO:0034595)	0.428834	0.990187	3	PIKFYVE	INPP5E	SYNJ2
oxidoreductase activity, acting on the CH-CH group of donors, NAD or NADP as acceptor (GO:0016628)	0.361117	0.990187	4	BDH2	DPYD	AKR1C2	PTGR2
GTPase inhibitor activity (GO:0005095)	0.428834	0.990187	3	RHOH	IQGAP2	CPEB2
sodium:proton antiporter activity (GO:0015385)	0.428834	0.990187	3	SLC9A4	SLC9C2	SLC9B2
activin receptor binding (GO:0070697)	0.464163	0.990187	2	INHBA	TDGF1
RNA polymerase II basal transcription factor binding (GO:0001091)	0.379751	0.990187	3	NOP58	AHR	ESR1
racemase and epimerase activity, acting on carbohydrates and derivatives (GO:0016857)	0.379751	0.990187	3	RPE	DSEL	DSE
type I transforming growth factor beta receptor binding (GO:0034713)	0.464163	0.990187	2	SMAD2	TGFBR2
alpha-(1->3)-fucosyltransferase activity (GO:0046920)	0.464163	0.990187	2	FUT6	FUT9
pre-mRNA 3'-splice site binding (GO:0030628)	0.464163	0.990187	2	SLU7	UHMK1
wide pore channel activity (GO:0022829)	0.379751	0.990187	3	GJD2	GJA1	GJA9
cAMP binding (GO:0030552)	0.379751	0.990187	3	PDE10A	RAPGEF2	HCN1
heparan sulfate sulfotransferase activity (GO:0034483)	0.476439	0.990187	3	HS3ST3A1	HS6ST2	HS2ST1
G-protein coupled nucleotide receptor activity (GO:0001608)	0.464163	0.990187	2	P2RY14	P2RY1
aldehyde dehydrogenase (NAD) activity (GO:0004029)	0.476439	0.990187	3	ALDH1A3	ALDH1A2	ALDH7A1
ammonium ion binding (GO:0070405)	0.428834	0.990187	3	CRP	OR5T1	SLC5A7
cytoskeletal adaptor activity (GO:0008093)	0.522595	0.990187	2	ABI2	BICD1
sodium ion binding (GO:0031402)	0.379751	0.990187	3	SLC24A2	TDG	ATP1A2
solute:sodium symporter activity (GO:0015370)	0.34488	0.990187	5	SLC5A7	SLC1A1	SLC5A12	SLC5A1	SLC5A3
transmembrane-ephrin receptor activity (GO:0005005)	0.361117	0.990187	4	EPHA6	EPHB1	EPHB4	EPHB3
protein-cysteine S-acyltransferase activity (GO:0019707)	0.417142	0.990187	5	ZDHHC20	ZDHHC21	ZDHHC2	ZDHHC14	ZDHHC15
bile acid binding (GO:0032052)	0.464163	0.990187	2	AKR1C2	AKR1C4
salt transmembrane transporter activity (GO:1901702)	0.522595	0.990187	2	SLC2A9	SLC22A9
ribosomal protein S6 kinase activity (GO:0004711)	0.401685	0.990187	2	RPS6KA3	RPS6KA6
3-hydroxyacyl-CoA dehydrogenase activity (GO:0003857)	0.464163	0.990187	2	HADHB	HSD17B12
histone-arginine N-methyltransferase activity (GO:0008469)	0.522595	0.990187	2	PRMT6	PRMT2
intracellular cAMP activated cation channel activity (GO:0005222)	0.522595	0.990187	2	HCN4	HCN1
chitinase activity (GO:0004568)	0.401685	0.990187	2	CHI3L2	CTBS
titin binding (GO:0031432)	0.476439	0.990187	3	MYBPC1	CALM3	CALM1
phosphate ion transmembrane transporter activity (GO:0015114)	0.428834	0.990187	3	SLC20A2	SLC17A2	XPR1
UDP-glucosyltransferase activity (GO:0035251)	0.522595	0.990187	2	UGGT2	UGGT1
platelet-derived growth factor receptor binding (GO:0005161)	0.428834	0.990187	3	ITGB3	PDGFC	PDGFB
ankyrin binding (GO:0030506)	0.40249	0.990187	4	NRCAM	RHCG	KCTD6	SLC8A1
hydrolase activity, acting on acid anhydrides, in phosphorus-containing anhydrides (GO:0016818)	0.522595	0.990187	2	NUDT3	NUDT4
mismatched DNA binding (GO:0030983)	0.464163	0.990187	2	MSH3	TDG
cGMP binding (GO:0030553)	0.576568	0.990187	2	PDE10A	PDE5A
low-density lipoprotein particle binding (GO:0030169)	0.361117	0.990187	4	CRP	MSR1	CD36	SORL1
endoribonuclease activity (GO:0004521)	0.381054	0.990187	5	TSNAX	PIWIL2	RCL1	DICER1	TSN
WW domain binding (GO:0050699)	0.395269	0.990187	6	TCEAL5	TCEAL4	TCEAL3	RAPGEF2	WBP11	TP63
aspartic-type peptidase activity (GO:0070001)	0.361117	0.990187	4	DDI2	KCTD11	PSEN1	ASPRV1
phosphoric diester hydrolase activity (GO:0008081)	0.34672	0.990187	7	PLCB4	PLCL1	NAPEPLD	ENPP1	MPPE1	GPCPD1	PLD1
3',5'-cyclic-nucleotide phosphodiesterase activity (GO:0004114)	0.483281	0.990187	4	PDE10A	PDE1C	PDE3B	PDE5A
transcription factor activity, RNA polymerase II core promoter sequence-specific (GO:0000983)	0.483281	0.990187	4	HEYL	POU2F1	HEY1	TAF4B
glycine transmembrane transporter activity (GO:0015187)	0.401685	0.990187	2	SLC6A5	SLC36A2
purinergic nucleotide receptor activity (GO:0001614)	0.522102	0.990187	3	P2RX7	P2RY14	P2RY1
histone acetyltransferase activity (H4-K8 specific) (GO:0043996)	0.576568	0.990187	2	PHF20	KANSL1L
lipoprotein particle receptor activity (GO:0030228)	0.522102	0.990187	3	CD36	SORL1	LRP6
hyaluronic acid binding (GO:0005540)	0.40249	0.990187	4	VCAN	TMEM2	CD44	IMPG2
protein-cysteine S-palmitoyltransferase activity (GO:0019706)	0.417142	0.990187	5	ZDHHC20	ZDHHC21	ZDHHC2	ZDHHC14	ZDHHC15
acyl-CoA ligase activity (GO:0003996)	0.464163	0.990187	2	ACSM2A	ACSM2B
histone kinase activity (GO:0035173)	0.522595	0.990187	2	PRKAA1	PRKAA2
adrenergic receptor binding (GO:0031690)	0.522102	0.990187	3	ARRDC3	GNAS	RAPGEF2
nucleoside diphosphate kinase activity (GO:0004550)	0.40249	0.990187	4	CMPK1	CMPK2	AK4	NME1
aminopeptidase activity (GO:0004177)	0.376372	0.990187	7	FAP	TPP2	PRSS16	PRCP	LNPEP	TRHDE	METAP1
neurotrophin TRK receptor binding (GO:0005167)	0.464163	0.990187	2	BDNF	FRS2
activin binding (GO:0048185)	0.576568	0.990187	2	ACVR1	ACVR2A
MHC class I protein binding (GO:0042288)	0.476439	0.990187	3	TUBB	ATP5A1	TAPBP
protein disulfide oxidoreductase activity (GO:0015035)	0.522102	0.990187	3	ENOX2	DNAJC10	GLRX
dipeptidase activity (GO:0016805)	0.576568	0.990187	2	PM20D2	FOLH1
NADPH binding (GO:0070402)	0.576568	0.990187	2	CBR4	CRYZ
double-stranded telomeric DNA binding (GO:0003691)	0.522595	0.990187	2	PURA	HMBOX1
glutamate receptor activity (GO:0008066)	0.483281	0.990187	4	GRIA2	GRID2	GRID1	GRM1
antiporter activity (GO:0015297)	0.361117	0.990187	4	SLC25A16	SLC7A6	CLCN5	CLCN4
L-alanine transmembrane transporter activity (GO:0015180)	0.401685	0.990187	2	SLC36A2	SLC36A4
lysine N-methyltransferase activity (GO:0016278)	0.522024	0.990187	4	SETD2	SETD7	SMYD2	METTL21A
1-phosphatidylinositol-4-phosphate 5-kinase activity (GO:0016308)	0.725709	0.990187	1	PIKFYVE
potassium ion antiporter activity (GO:0022821)	0.565486	0.990187	3	SLC24A2	SLC9A4	SLC9C2
protein methyltransferase activity (GO:0008276)	0.414807	0.990187	8	PRMT6	SETD2	PRMT2	SETD7	SMYD2	METTL21A	FBXO11	WDR77
galanin receptor activity (GO:0004966)	0.625923	0.990187	2	CYSLTR1	CYSLTR2
acyl-CoA oxidase activity (GO:0003997)	0.725709	0.990187	1	ACOX1
endodeoxyribonuclease activity, producing 5'-phosphomonoesters (GO:0016888)	0.401685	0.990187	2	DNA2	DICER1
thioesterase binding (GO:0031996)	0.625923	0.990187	2	TRAF6	TRAF1
RNA 7-methylguanosine cap binding (GO:0000340)	0.522595	0.990187	2	NCBP2	EIF4E
cyclic nucleotide binding (GO:0030551)	0.522024	0.990187	4	PDE10A	RAPGEF2	PDE5A	HCN1
arylsulfatase activity (GO:0004065)	0.379751	0.990187	3	ARSK	ARSB	SULF2
NF-kappaB binding (GO:0051059)	0.417142	0.990187	5	HDAC2	TP53BP2	TAF4B	HIF1AN	MTDH
cation:cation antiporter activity (GO:0015491)	0.401685	0.990187	2	SLC41A1	SLC9B2
calcium-dependent phospholipase A2 activity (GO:0047498)	0.401685	0.990187	2	PLA2G12A	PLA2G4D
oxidoreductase activity, acting on a sulfur group of donors, disulfide as acceptor (GO:0016671)	0.576568	0.990187	2	DNAJC10	MSRB2
oxidoreductase activity, acting on single donors with incorporation of molecular oxygen, incorporation of two atoms of oxygen (GO:0016702)	0.522024	0.990187	4	ALOX15	PTGS2	ADO	CDO1
ion channel inhibitor activity (GO:0008200)	0.522503	0.990187	6	KCNMB2	STX7	WNK3	NEDD4L	CALM1	VTI1B
NAD binding (GO:0051287)	0.559318	0.990187	4	BDH2	ALDH5A1	SORD	SIRT5
estrogen receptor binding (GO:0030331)	0.491482	0.990187	6	NCOA1	PRMT2	NRIP1	STRN	ESR1	ZNF366
3'-5' DNA helicase activity (GO:0043138)	0.428834	0.990187	3	GINS1	GINS4	ASCC3
potassium ion binding (GO:0030955)	0.670682	0.990187	2	SLC24A2	ATP1A2
fibroblast growth factor receptor binding (GO:0005104)	0.379751	0.990187	3	FRS2	FGF2	FGF10
protein binding involved in cell-matrix adhesion (GO:0098634)	0.401685	0.990187	2	ITGB1	MADCAM1
iron ion transmembrane transporter activity (GO:0005381)	0.725709	0.990187	1	SLC11A2
death receptor binding (GO:0005123)	0.576568	0.990187	2	RIPK1	MYD88
potassium:proton antiporter activity (GO:0015386)	0.625923	0.990187	2	SLC9A4	SLC9C2
steroid hormone receptor binding (GO:0035258)	0.425383	0.990187	14	NCOA1	PRMT2	BRCA1	ESR1	PIAS2	FOXP1	PIAS1	NR4A2	NR4A1	GRIP1	NRIP1	STRN	PPARGC1A	ZNF366
adenyl nucleotide binding (GO:0030554)	0.625923	0.990187	2	BAG4	BAG2
uridylyltransferase activity (GO:0070569)	0.725709	0.990187	1	ZCCHC11
RNA polymerase I core binding (GO:0001042)	0.725709	0.990187	1	SPTY2D1
RNA polymerase II transcription cofactor activity (GO:0001104)	0.357644	0.990187	16	MEF2A	NCOA1	MKL2	SOX11	BRCA1	MED4	TRERF1	SMARCA2	TBX18	MED13L	MED13	SIN3B	MED21	TBX20	RBBP8	PPARGC1A
enoyl-CoA hydratase activity (GO:0004300)	0.464163	0.990187	2	HADHB	AUH
H4 histone acetyltransferase activity (GO:0010485)	0.606359	0.990187	3	NAA50	PHF20	KANSL1L
alkali metal ion binding (GO:0031420)	0.565486	0.990187	3	SLC24A2	TDG	ATP1A2
anion:anion antiporter activity (GO:0015301)	0.522024	0.990187	4	SLC26A7	SLC26A9	SLC25A4	SLC22A9
type II transforming growth factor beta receptor binding (GO:0005114)	0.401685	0.990187	2	TGFB2	BAMBI
telomerase RNA binding (GO:0070034)	0.559318	0.990187	4	PAPD5	DHX36	SNRPD3	DCP2
G-protein coupled acetylcholine receptor activity (GO:0016907)	0.725709	0.990187	1	CHRM3
ADP-ribosylation factor binding (GO:0030306)	0.725709	0.990187	1	SORL1
FAD binding (GO:0071949)	0.443334	0.990187	4	CYB5R4	NQO2	KDM1B	MICAL2
protein kinase C activity (GO:0004697)	0.576568	0.990187	2	PRKCI	PRKD1
phosphatidylinositol-4,5-bisphosphate phosphatase activity (GO:0106019)	0.464163	0.990187	2	INPP5E	SYNJ2
beta-tubulin binding (GO:0048487)	0.522194	0.990187	5	TTLL7	IFT74	PIFO	FGF13	LRPPRC
solute:proton antiporter activity (GO:0015299)	0.725709	0.990187	1	SLC9B2
U4 snRNA binding (GO:0030621)	0.725709	0.990187	1	SART3
MHC class I receptor activity (GO:0032393)	0.725709	0.990187	1	CD160
phosphatidylethanolamine binding (GO:0008429)	0.725709	0.990187	1	NF1
SUMO-specific protease activity (GO:0016929)	0.401685	0.990187	2	SENP6	SENP1
histone acetyltransferase activity (H4-K5 specific) (GO:0043995)	0.576568	0.990187	2	PHF20	KANSL1L
nucleosomal DNA binding (GO:0031492)	0.587434	0.990187	5	SMARCE1	SMARCC1	HDAC2	RBBP4	HMGA2
ATPase activity, coupled to transmembrane movement of substances (GO:0042626)	0.523333	0.990187	8	ABCA10	ABCB1	ABCA5	ABCA6	ABCB5	ABCC9	ABCB11	ABCG2
monovalent inorganic cation transmembrane transporter activity (GO:0015077)	0.606359	0.990187	3	SLC36A2	SLC12A1	ATP1B4
phosphatidylinositol 3-kinase regulatory subunit binding (GO:0036312)	0.401685	0.990187	2	PTPN13	FAM83B
arachidonic acid epoxygenase activity (GO:0008392)	0.606359	0.990187	3	CYP2C8	CYP2C19	CYP4F12
transcriptional repressor activity, RNA polymerase II transcription factor binding (GO:0001191)	0.421986	0.990187	9	EOMES	YY1	CNOT7	SIN3B	ZFP42	BHLHE41	RBBP8	AHRR	TBX18
transmitter-gated ion channel activity involved in regulation of postsynaptic membrane potential (GO:1904315)	0.435805	0.990187	7	GABRA2	GRIA2	GABRA1	GRID2	GRID1	GABRA4	GABRA3
methyl-CpG binding (GO:0008327)	0.483281	0.990187	4	MECP2	ZBTB33	ZBTB4	WDR77
potassium-transporting ATPase activity (GO:0008556)	0.625923	0.990187	2	ATP1B4	ATP1A2
carboxylic acid binding (GO:0031406)	0.552737	0.990187	6	VCAN	TMEM2	AKR1C2	HIF1AN	CD44	IMPG2
arylesterase activity (GO:0004064)	0.725709	0.990187	1	PON2
bicarbonate transmembrane transporter activity (GO:0015106)	0.559318	0.990187	4	SLC4A7	SLC26A7	SLC26A9	SLC4A4
transferase activity, transferring amino-acyl groups (GO:0016755)	0.565486	0.990187	3	ATE1	QPCT	GGACT
4 iron, 4 sulfur cluster binding (GO:0051539)	0.625923	0.990187	2	ISCA2	ACO1
cytokine activity (GO:0005125)	0.391437	0.990187	28	CXCL6	CCL13	BMP10	CNTF	CCL4L1	HMGB1	CXCL13	FGF2	CXCL5	NDP	GDF11	IL33	TGFB2	EDN1	IL31	TSLP	CCL20	OSM	PPBP	INHBA	GDF5	IFNW1	BMP5	AIMP1	BMP4	CXCL10	IFNG	IFNE
ubiquitin protein ligase activity involved in ERAD pathway (GO:1904264)	0.428834	0.990187	2	SYVN1	2019-03-06	DZIP3
histone demethylase activity (H3-K9 specific) (GO:0032454)	0.710989	0.990187	2	JMJD1C	PHF8
protein kinase A catalytic subunit binding (GO:0034236)	0.710989	0.990187	2	PRKAR1A	PKIA
peptide-lysine-N-acetyltransferase activity (GO:0061733)	0.522894	0.990187	7	KAT2B	TADA2A	ESCO1	TEX30	KAT6B	KAT6A	ELP4
RNA polymerase II transcription factor activity, sequence-specific transcription regulatory region DNA binding (GO:0001133)	0.443334	0.990187	4	THRB	RORA	NR1D2	RORB
protein tyrosine kinase activator activity (GO:0030296)	0.670682	0.990187	2	ERBB3	ERCC6
Arp2/3 complex binding (GO:0071933)	0.771998	0.990187	1	IQGAP2
neurotrophin TRKA receptor binding (GO:0005168)	0.725709	0.990187	1	FRS2
phospholipase C activity (GO:0004629)	0.522194	0.990187	5	CHRM3	EDNRA	PLCB4	PLCL1	BDKRB2
phospholipase A2 activity (GO:0004623)	0.427687	0.990187	6	PLA2G16	PLA2G12A	PLA2G2D	PLA2G4D	PAFAH1B2	PAFAH1B1
O-acetyltransferase activity (GO:0016413)	0.725709	0.990187	1	CASD1
poly(A)-specific ribonuclease activity (GO:0004535)	0.670682	0.990187	2	CNOT6	CNOT7
prenyltransferase activity (GO:0004659)	0.625923	0.990187	2	NUS1	PTAR1
fucosyltransferase activity (GO:0008417)	0.710989	0.990187	2	FUT6	FUT9
beta-galactoside (CMP) alpha-2,3-sialyltransferase activity (GO:0003836)	0.771998	0.990187	1	ST3GAL6
olfactory receptor binding (GO:0031849)	0.725709	0.990187	1	RTP4
neuropeptide receptor activity (GO:0008188)	0.58206	0.990187	6	CYSLTR1	CYSLTR2	NPY1R	KISS1R	NMUR2	SSTR2
flap endonuclease activity (GO:0048256)	0.771998	0.990187	1	DNA2
protein kinase A regulatory subunit binding (GO:0034237)	0.644585	0.990187	3	ARFGEF1	GSKIP	AKAP6
phosphatidylcholine 1-acylhydrolase activity (GO:0008970)	0.576568	0.990187	2	PLA2G16	PLA2G4D
ATP-dependent DNA helicase activity (GO:0004003)	0.555407	0.990187	5	MCM4	MCM6	ASCC3	CHD2	CHD1
gamma-tubulin binding (GO:0043015)	0.6801	0.990187	3	BLOC1S2	PIFO	TUBGCP4
phosphatidylinositol transporter activity (GO:0008526)	0.810477	0.990187	1	PITPNC1
galactosyltransferase activity (GO:0008378)	0.576568	0.990187	2	B3GALT6	B4GALT6
[heparan sulfate]-glucosamine 3-sulfotransferase 1 activity (GO:0008467)	0.771998	0.990187	1	HS3ST3A1
malate dehydrogenase activity (GO:0016615)	0.725709	0.990187	1	MDH1B
P-P-bond-hydrolysis-driven transmembrane transporter activity (GO:0015405)	0.523333	0.990187	8	ABCA10	ABCB1	ABCA5	ABCA6	ABCB5	ABCC9	ABCB11	ABCG2
E-box binding (GO:0070888)	0.376372	0.990187	7	MYOG	MYC	ATOH8	BHLHE41	TWIST1	AHR	ARNTL2
poly(G) binding (GO:0034046)	0.771998	0.990187	1	ATXN1
flavin adenine dinucleotide binding (GO:0050660)	0.447786	0.990187	9	CYB5R4	NQO2	KDM1B	ACOX1	DPYD	GSR	MICAL2	CYBB	NOX5
5'-nucleotidase activity (GO:0008253)	0.747074	0.990187	2	NT5DC3	NT5C2
oxalate transmembrane transporter activity (GO:0019531)	0.625923	0.990187	2	SLC26A7	SLC26A9
phosphorylase activity (GO:0004645)	0.725709	0.990187	1	MTAP
platelet-derived growth factor binding (GO:0048407)	0.625923	0.990187	2	COL4A1	PDGFB
U1 snRNA binding (GO:0030619)	0.771998	0.990187	1	SNRPB2
low-density lipoprotein particle receptor binding (GO:0050750)	0.712903	0.990187	3	CRP	CLU	HSP90B1
sodium:potassium-exchanging ATPase activity (GO:0005391)	0.625923	0.990187	2	ATP1B4	ATP1A2
alcohol dehydrogenase activity, zinc-dependent (GO:0004024)	0.725709	0.990187	1	ADH6
U6 snRNA binding (GO:0017070)	0.625923	0.990187	2	SART3	RBM22
neuropeptide binding (GO:0042923)	0.6801	0.990187	3	GPR1	NMUR2	SSTR2
single-stranded telomeric DNA binding (GO:0043047)	0.670682	0.990187	2	RPA1	HNRNPA1
ribosomal small subunit binding (GO:0043024)	0.747074	0.990187	2	CPEB2	NME1
histone acetyltransferase activity (GO:0004402)	0.578035	0.990187	7	NAA50	KAT2B	TADA2A	TEX30	KAT6B	KAT6A	ELP4
ATP-dependent 3'-5' DNA helicase activity (GO:0043140)	0.771998	0.990187	1	ASCC3
fatty acid ligase activity (GO:0015645)	0.644585	0.990187	3	ACSL5	ACSM2A	ACSM2B
collagen binding (GO:0005518)	0.548376	0.990187	9	ITGB1	DDR1	CCBE1	ECM2	COL14A1	PDGFB	ANTXR1	CD44	CTSS
vitamin D receptor binding (GO:0042809)	0.747074	0.990187	2	MED13	MED4
prostaglandin E receptor activity (GO:0004957)	0.725709	0.990187	1	PTGER4
voltage-gated calcium channel activity (GO:0005245)	0.465256	0.990187	7	CACNB2	CACNG8	CATSPER2	IL1RAPL1	ITGAV	PKD2	NALCN
vasopressin receptor activity (GO:0005000)	0.725709	0.990187	1	AVPR1A
phosphatidylcholine transporter activity (GO:0008525)	0.810477	0.990187	1	ABCB1
histone threonine kinase activity (GO:0035184)	0.771998	0.990187	1	CHEK1
kinase activator activity (GO:0019209)	0.628843	0.990187	4	MOB1B	RGCC	DUSP19	FGF13
G-protein coupled neurotransmitter receptor activity (GO:0099528)	0.725709	0.990187	1	CHRM3
actinin binding (GO:0042805)	0.559318	0.990187	4	SYNPO2	CNKSR3	PDLIM5	PKD2
histone demethylase activity (H3-K36 specific) (GO:0051864)	0.842464	0.990187	1	PHF8
nucleobase-containing compound kinase activity (GO:0019205)	0.618155	0.990187	5	CMPK1	CMPK2	AK4	NT5C2	NME1
RNA polymerase I regulatory region sequence-specific DNA binding (GO:0001163)	0.810477	0.990187	1	TAF1B
cyclin-dependent protein serine/threonine kinase regulator activity (GO:0016538)	0.719027	0.990187	4	KAT2B	CCNT2	CCNT1	CCNC
purinergic receptor activity (GO:0035586)	0.810477	0.990187	1	P2RX7
potassium:chloride symporter activity (GO:0015379)	0.842464	0.990187	1	SLC12A1
cytochrome-b5 reductase activity, acting on NAD(P)H (GO:0004128)	0.725709	0.990187	1	CYB5R4
potassium channel activity (GO:0005267)	0.439755	0.990187	18	HCN4	KCNK5	KCNG3	KCNG4	KCNH5	KCNB1	KCNC2	KCNK12	HPN	ABCC9	PKD2	KCNMB1	KCNMB2	KCNQ3	KCNQ5	TMEM38A	TMEM38B	HCN1
oxidoreductase activity, acting on paired donors, with incorporation or reduction of molecular oxygen, reduced iron-sulfur protein as one donor, and incorporation of one atom of oxygen (GO:0016713)	0.771998	0.990187	1	CYP4F12
intronic transcription regulatory region sequence-specific DNA binding (GO:0001161)	0.810477	0.990187	1	GRHL2
phosphate ion binding (GO:0042301)	0.842464	0.990187	1	MTHFD2
frizzled binding (GO:0005109)	0.637575	0.990187	6	WNT2B	RYK	BAMBI	NDP	WNT16	LRP6
alcohol dehydrogenase (NADP+) activity (GO:0008106)	0.712903	0.990187	3	RDH10	AKR1C2	AKR1C4
potassium ion symporter activity (GO:0022820)	0.842464	0.990187	1	SLC12A1
long-chain fatty acid-CoA ligase activity (GO:0004467)	0.869054	0.990187	1	ACSL5
nucleotide receptor activity (GO:0016502)	0.771998	0.990187	1	P2RX7
type I interferon receptor binding (GO:0005132)	0.80771	0.990187	2	IFNE	IFNW1
satellite DNA binding (GO:0003696)	0.401685	0.990187	2	HEYL	HEY1
mRNA 5'-UTR binding (GO:0048027)	0.770601	0.990187	3	IGF2BP1	IGF2BP2	MYH10
calcium:sodium antiporter activity (GO:0005432)	0.725709	0.990187	1	SLC8A1
voltage-gated potassium channel activity involved in ventricular cardiac muscle cell action potential repolarization (GO:1902282)	0.810477	0.990187	1	KCNJ3
nucleoside-triphosphate diphosphatase activity (GO:0047429)	0.842464	0.990187	1	ENPP1
long-chain fatty acid binding (GO:0036041)	0.725709	0.990187	1	FABP2
voltage-gated potassium channel activity involved in cardiac muscle cell action potential repolarization (GO:0086008)	0.670682	0.990187	2	KCNJ2	KCNJ3
crossover junction endodeoxyribonuclease activity (GO:0008821)	0.810477	0.990187	1	GEN1
lipase inhibitor activity (GO:0055102)	0.869054	0.990187	1	ANGPTL3
GTP-Rho binding (GO:0017049)	0.832879	0.990187	2	ANLN	RTKN2
acid-thiol ligase activity (GO:0016878)	0.80771	0.990187	2	ACSM2A	ACSM2B
fibroblast growth factor binding (GO:0017134)	0.770601	0.990187	3	ITGB3	ITGAV	CXCL13
dopamine neurotransmitter receptor activity, coupled via Gi/Go (GO:0001591)	0.842464	0.990187	1	OR5T1
protein-hormone receptor activity (GO:0016500)	0.869054	0.990187	1	TSHR
clathrin adaptor activity (GO:0035615)	0.869054	0.990187	1	AP2B1
cyclin-dependent protein serine/threonine kinase activity (GO:0004693)	0.522503	0.990187	6	CDKL2	CDK17	CCNB2	CDK6	PRPF4B	CDK15
leak channel activity (GO:0022840)	0.6801	0.990187	3	KCNK5	KCNK12	NALCN
5'-3' DNA helicase activity (GO:0043139)	0.725709	0.990187	1	DNA2
hormone receptor binding (GO:0051427)	0.55083	0.990187	7	NCOA1	NCOA2	ANKAR	NRIP1	CRY1	NCOA7	HIF1A
vascular endothelial growth factor receptor 2 binding (GO:0043184)	0.725709	0.990187	1	ITGB3
protein channel activity (GO:0015266)	0.891157	0.990187	1	TIMM17A
bHLH transcription factor binding (GO:0043425)	0.770601	0.990187	3	SP1	BHLHE41	TWIST1
sterol esterase activity (GO:0004771)	0.842464	0.990187	1	LIPA
extracellular ATP-gated cation channel activity (GO:0004931)	0.771998	0.990187	1	P2RX7
interleukin-17 receptor activity (GO:0030368)	0.771998	0.990187	1	IL17RD
proteasome-activating ATPase activity (GO:0036402)	0.725709	0.990187	1	PSMC4
ATPase-coupled anion transmembrane transporter activity (GO:0043225)	0.670682	0.990187	2	ABCC9	ABCB11
vinculin binding (GO:0017166)	0.869054	0.990187	1	ACTN1
chemokine receptor binding (GO:0042379)	0.623779	0.990187	8	CXCL10	CXCL6	CCL13	CCL20	CCL4L1	PPBP	CXCL13	CXCL5
potassium ion transmembrane transporter activity (GO:0015079)	0.49433	0.990187	7	KCNK5	SLC12A1	ABCC9	TMEM38A	TMEM38B	PKD2	HCN1
phospholipase activity (GO:0004620)	0.525283	0.990187	12	PLA2G16	PLA2G12A	PLA2G2D	PLCB4	PLA2G4D	PLCL1	NAPEPLD	DDHD1	PLD1	MGLL	PAFAH1B2	PAFAH1B1
delayed rectifier potassium channel activity (GO:0005251)	0.395269	0.990187	6	KCNG3	KCNG4	KCNB1	KCNC2	KCNQ3	KCNQ5
retinoid X receptor binding (GO:0046965)	0.842464	0.990187	1	NR4A2
glycine binding (GO:0016594)	0.710989	0.990187	2	GRIN3A	GRIN2B
UDP-galactosyltransferase activity (GO:0035250)	0.628843	0.990187	4	B3GALT6	B3GALT5	B4GALT6	COLGALT1
lysophosphatidic acid acyltransferase activity (GO:0042171)	0.891475	0.990187	2	LPCAT1	AGPAT4
3-chloroallyl aldehyde dehydrogenase activity (GO:0004028)	0.464163	0.990187	2	ALDH1A3	ALDH1A2
intramolecular oxidoreductase activity, transposing C=C bonds (GO:0016863)	0.625923	0.990187	2	IDI1	DCT
hydrogen-exporting ATPase activity (GO:0036442)	0.522024	0.990187	4	ATP2A2	ATP2C1	ATP6V1C1	ATP6V1C2
cadherin binding involved in cell-cell adhesion (GO:0098641)	0.874468	0.990187	2	RAB10	PDLIM5
oxidized DNA binding (GO:0032356)	0.810477	0.990187	1	MSH3
beta-1,3-galactosyltransferase activity (GO:0048531)	0.747074	0.990187	2	C1GALT1	B3GALT5
phosphatidylinositol bisphosphate kinase activity (GO:0052813)	0.56741	0.990187	12	ERBB3	FGF9	GAB1	PDGFB	FRS2	PIK3CB	FGF2	MET	ESR1	EGFR	PIK3CG	FGF10
protein binding involved in cell-cell adhesion (GO:0098632)	0.906318	0.990187	2	RAB10	PDLIM5
transmembrane receptor protein phosphatase activity (GO:0019198)	0.522102	0.990187	3	PTPRN2	PTPRZ1	PTPRG
C2H2 zinc finger domain binding (GO:0070742)	0.909529	0.990187	1	HMGA2
ion antiporter activity (GO:0099516)	0.644585	0.990187	3	SLC26A7	SLC26A9	SLC22A9
kinesin binding (GO:0019894)	0.745206	0.990187	4	CLSTN1	PIFO	AP1AR	TTBK2
endoribonuclease activity, producing 5'-phosphomonoesters (GO:0016891)	0.628843	0.990187	4	DBR1	DROSHA	DICER1	RPP14
protein-disulfide reductase activity (GO:0047134)	0.725709	0.990187	1	PGK1
telomerase activity (GO:0003720)	0.810477	0.990187	1	HMBOX1
transferrin receptor binding (GO:1990459)	0.464163	0.990187	2	SNX4	SNX2
oxidoreductase activity, oxidizing metal ions, NAD or NADP as acceptor (GO:0016723)	0.869054	0.990187	1	STEAP2
muscle alpha-actinin binding (GO:0051371)	0.80771	0.990187	2	MYBPC1	SYNPO2
transcription corepressor binding (GO:0001222)	0.670682	0.990187	2	PER3	RORA
high-affinity glutamate transmembrane transporter activity (GO:0005314)	0.771998	0.990187	1	SLC1A1
polypeptide N-acetylgalactosaminyltransferase activity (GO:0004653)	0.906318	0.990187	2	GALNT7	GALNT1
protein kinase activator activity (GO:0030295)	0.618758	0.990187	9	RGCC	ERBB3	TAOK1	DUSP19	CALM3	ERCC6	FGF13	CALM1	LTF
MAP kinase tyrosine/serine/threonine phosphatase activity (GO:0017017)	0.771998	0.990187	1	DUSP2
exonuclease activity (GO:0004527)	0.610367	0.990187	6	CNOT6	CNOT7	PDE12	ENPP1	POLK	RAD9B
peptidase activator activity involved in apoptotic process (GO:0016505)	0.855031	0.990187	2	APAF1	EBAG9
transcriptional repressor activity, RNA polymerase II activating transcription factor binding (GO:0098811)	0.909529	0.990187	1	CREB1
insulin-like growth factor II binding (GO:0031995)	0.771998	0.990187	1	INSR
ion transmembrane transporter activity (GO:0015075)	0.749803	0.990187	5	SLC4A7	GJA1	ATP11B	SLC4A4	SLC9B2
armadillo repeat domain binding (GO:0070016)	0.842464	0.990187	1	STRN
insulin-like growth factor receptor binding (GO:0005159)	0.522102	0.990187	3	INSR	GNAS	YWHAG
peptidase activator activity (GO:0016504)	0.80771	0.990187	2	EBAG9	CLPX
RAGE receptor binding (GO:0050786)	0.842464	0.990187	1	HMGB1
lipoprotein particle binding (GO:0071813)	0.594971	0.990187	4	CRP	MSR1	CD36	SORL1
damaged DNA binding (GO:0003684)	0.700472	0.990187	7	MSH3	TDG	RPA1	RBBP8	HMGB1	POLK	TP63
glucose:sodium symporter activity (GO:0005412)	0.725709	0.990187	1	SLC5A1
Ral GTPase binding (GO:0017160)	0.909529	0.990187	1	EXOC8
transcription factor activity, RNA polymerase II core promoter sequence-specific binding involved in preinitiation complex assembly (GO:0001075)	0.842464	0.990187	1	TAF4B
calcium-dependent phospholipid binding (GO:0005544)	0.721908	0.990187	7	C2CD5	SYT2	PCLO	SYT16	C2CD4A	CPNE3	SYT9
ligand-gated calcium channel activity (GO:0099604)	0.891475	0.990187	2	GRIN2A	GRIN2B
Rab guanyl-nucleotide exchange factor activity (GO:0017112)	0.523802	0.990187	9	DENND2D	TRAPPC3L	RABGEF1	DENND4A	RAB3IP	WDR41	RAB3GAP2	SMCR8	GAPVD1
death receptor activity (GO:0005035)	0.818443	0.990187	3	CD40	FAS	TNFRSF14
pseudouridine synthase activity (GO:0009982)	0.909529	0.990187	1	PUS7L
G-quadruplex DNA binding (GO:0051880)	0.771998	0.990187	1	DHX36
carboxylic acid transmembrane transporter activity (GO:0046943)	0.415832	0.990187	12	SLC7A6	SLC38A1	SLC36A2	SLC1A1	SLC16A7	SLC16A10	SLC38A9	EMB	SLC36A4	SLC38A2	SLC16A14	SLC38A4
mitogen-activated protein kinase binding (GO:0051019)	0.483281	0.990187	4	TPR	MICALCL	PPM1D	MAPK14
receptor antagonist activity (GO:0048019)	0.832879	0.990187	2	AGTR2	DKK3
phosphatidylglycerol binding (GO:1901611)	0.869054	0.990187	1	PITPNC1
protein kinase C binding (GO:0005080)	0.55083	0.990187	7	TOP2A	ITGAV	AVPR1A	PDLIM5	YWHAG	TIRAP	DACT1
DEAD/H-box RNA helicase binding (GO:0017151)	0.771998	0.990187	1	DROSHA
cysteine-type peptidase activity (GO:0008234)	0.568781	0.990187	11	USP13	USP8	CTSO	USP15	USP16	USP49	USP6	CASP10	CAPN2	OTUD7B	CTSS
endodeoxyribonuclease activity, producing 3'-phosphomonoesters (GO:0016889)	0.891157	0.990187	1	GEN1
protein tyrosine/serine/threonine phosphatase activity (GO:0008138)	0.376372	0.990187	7	DUSP2	DUSP3	DUSP19	DUSP28	DUSP18	SSH2	SSH1
alpha-actinin binding (GO:0051393)	0.902286	0.990187	3	MYBPC1	SYNPO2	CNKSR3
steroid hydroxylase activity (GO:0008395)	0.749803	0.990187	5	CYP39A1	CYP2C8	CYP2U1	CYP2C19	CYP8B1
arachidonic acid monooxygenase activity (GO:0008391)	0.606359	0.990187	3	CYP2C8	CYP2C19	CYP4F12
ether hydrolase activity (GO:0016803)	0.810477	0.990187	1	EPHX2
C-acyltransferase activity (GO:0016408)	0.379751	0.990187	3	HADHB	ACSM2A	ACSM2B
adenylyltransferase activity (GO:0070566)	0.906318	0.990187	2	PAPD4	PAPOLB
phosphatidylinositol 3-kinase activity (GO:0035004)	0.425383	0.990187	14	GAB1	PDGFB	FRS2	PIK3CB	PIK3C2A	FGF2	ESR1	EGFR	PIK3CG	ERBB3	FGF9	PIK3C3	MET	FGF10
N-acetylglucosamine 6-O-sulfotransferase activity (GO:0001517)	0.771998	0.990187	1	CHST6
glucuronosyltransferase activity (GO:0015020)	0.848755	0.990187	4	UGT2B10	EXT2	UGT2B4	CHSY3
protein-glutamic acid ligase activity (GO:0070739)	0.771998	0.990187	1	TTLL7
protein serine/threonine phosphatase inhibitor activity (GO:0004865)	0.869054	0.990187	1	PPP1R14B
lipoprotein particle receptor binding (GO:0070325)	0.838999	0.990187	3	CRP	CLU	HSP90B1
protein-lysine N-methyltransferase activity (GO:0016279)	0.721908	0.990187	7	SETD2	KMT2A	SETD7	SMYD2	ASH2L	ASH1L	METTL21A
Rac GTPase binding (GO:0048365)	0.775281	0.990187	6	ABI2	RCC2	SRGAP3	IQGAP2	SRGAP2	NOX1
calcium-dependent cysteine-type endopeptidase activity (GO:0004198)	0.906318	0.990187	2	CAPN7	CAPN2
retinoic acid receptor binding (GO:0042974)	0.80771	0.990187	2	NR4A2	PRMT2
choline transmembrane transporter activity (GO:0015220)	0.771998	0.990187	1	SLC5A7
rRNA methyltransferase activity (GO:0008649)	0.810477	0.990187	1	TRMT61B
transmembrane receptor protein tyrosine phosphatase activity (GO:0005001)	0.522102	0.990187	3	PTPRN2	PTPRZ1	PTPRG
Lys48-specific deubiquitinase activity (GO:1990380)	0.869054	0.990187	1	OTUD7B
calcium-dependent protein kinase activity (GO:0010857)	0.810477	0.990187	1	CAMK4
cyclin-dependent protein kinase activity (GO:0097472)	0.552737	0.990187	6	CDKL2	CDK17	CCNB2	CDK6	PRPF4B	CDK15
SH3/SH2 adaptor activity (GO:0005070)	0.37928	0.990187	10	SHE	KHDRBS1	FCRL2	CHN1	GAB1	IRS4	TP53BP2	CLNK	STAM	PAG1
L-amino acid transmembrane transporter activity (GO:0015179)	0.86949	0.990187	6	SLC7A6	SLC38A1	SLC36A2	SLC1A1	SLC25A12	SLC36A4
hexosaminidase activity (GO:0015929)	0.891157	0.990187	1	TMEM2
ATP transmembrane transporter activity (GO:0005347)	0.842464	0.990187	1	SLC25A4
potassium ion leak channel activity (GO:0022841)	0.80771	0.990187	2	KCNK5	KCNK12
aryl sulfotransferase activity (GO:0004062)	0.891157	0.990187	1	SULT1C4
DNA N-glycosylase activity (GO:0019104)	0.869054	0.990187	1	TDG
inward rectifier potassium channel activity (GO:0005242)	0.522024	0.990187	4	KCNJ10	KCNJ15	KCNJ2	KCNJ3
nuclease activity (GO:0004518)	0.815704	0.990187	8	PGAP1	PDE12	ENPP1	ANG	DNA2	N4BP2	LRPPRC	NME1
inorganic anion transmembrane transporter activity (GO:0015103)	0.856539	0.990187	6	ANKH	SLC1A1	SLC26A7	SLC26A9	XPR1	SLC22A9
eukaryotic initiation factor 4E binding (GO:0008190)	0.869054	0.990187	1	EIF4EBP2
hyalurononglucosaminidase activity (GO:0004415)	0.725709	0.990187	1	TMEM2
beta-N-acetylglucosaminylglycopeptide beta-1,4-galactosyltransferase activity (GO:0003831)	0.771998	0.990187	1	B4GALT6
protein phosphatase inhibitor activity (GO:0004864)	0.795691	0.990187	3	PPP1R14B	SET	ARPP19
phosphatidylinositol bisphosphate binding (GO:1902936)	0.742571	0.990187	13	AMER2	FRMPD4	MAPKAP1	ALOX15	WIPI2	TIRAP	SNX18	SESTD1	TTPA	KRIT1	KCNJ2	MARK1	PFN2
calcium channel inhibitor activity (GO:0019855)	0.869054	0.990187	1	CALM1
organic cation transmembrane transporter activity (GO:0015101)	0.891475	0.990187	2	SLC25A16	SLC5A7
peptide N-acetyltransferase activity (GO:0034212)	0.522102	0.990187	3	NAA50	KAT2B	ESCO1
phosphatidylinositol-3-phosphate binding (GO:0032266)	0.812528	0.990187	4	SNX27	SESTD1	LANCL2	WIPI2
lipase activity (GO:0016298)	0.629909	0.990187	7	DAGLA	AADAC	GOLT1B	ABHD2	DDHD1	LIPA	MGLL
ATP-gated ion channel activity (GO:0035381)	0.771998	0.990187	1	P2RX7
intracellular calcium activated chloride channel activity (GO:0005229)	0.6801	0.990187	3	NMUR2	ANO6	ANO3
3',5'-cyclic-AMP phosphodiesterase activity (GO:0004115)	0.779213	0.990187	2	PDE10A	PDE3B
organic anion transmembrane transporter activity (GO:0008514)	0.670318	0.990187	11	SLC25A16	SLC2A9	SLC35B3	SLC35A3	SLC35B4	SLCO1B3	SLCO1A2	SLC26A7	SLCO5A1	SLC26A9	SLC22A9
monocarboxylic acid binding (GO:0033293)	0.770601	0.990187	3	CYP26B1	AKR1C2	AKR1C4
acetylgalactosaminyltransferase activity (GO:0008376)	0.856539	0.990187	6	GALNT7	EXTL2	GALNT1	B3GALT6	CHSY3	B3GALT5
sodium-independent organic anion transmembrane transporter activity (GO:0015347)	0.848755	0.990187	4	SLCO1B3	SLCO1A2	SLCO5A1	SLC22A9
chemokine activity (GO:0008009)	0.549427	0.990187	8	CXCL10	CXCL6	CCL13	CCL20	CCL4L1	PPBP	CXCL13	CXCL5
ephrin receptor binding (GO:0046875)	0.874468	0.990187	2	CBL	PIK3CG
ion gated channel activity (GO:0022839)	0.838999	0.990187	3	NMUR2	ANO6	ANO3
Y-form DNA binding (GO:0000403)	0.725709	0.990187	1	MSH3
microtubule binding (GO:0008017)	0.89842	0.990187	27	MAP10	KIF14	KIF11	TTBK2	BCL2L11	KIF5C	KIF3A	KIF5B	KRIT1	ZNF207	KIF1C	TPPP	RAE1	CLASP2	DST	SGIP1	RCC2	CCSAP	LRPPRC	DNM3	APC	KIF26B	DCX	BIRC5	TUBGCP4	FGF13	PAFAH1B1
hydro-lyase activity (GO:0016836)	0.907277	0.990187	5	HADHB	AUH	ENOSF1	ACO1	CA13
mannosyl-oligosaccharide 1,2-alpha-mannosidase activity (GO:0004571)	0.810477	0.990187	1	MAN1A2
Hsp90 protein binding (GO:0051879)	0.791897	0.990187	4	AHR	NR3C1	HDAC8	HIF1A
Rho guanyl-nucleotide exchange factor activity (GO:0005089)	0.899558	0.990187	7	PREX2	AKAP13	ARHGEF12	ARHGEF37	SOS1	ARHGEF5	ARHGEF6
ribosome binding (GO:0043022)	0.66362	0.990187	6	SRP19	DENR	ETF1	CPEB3	CPEB2	CPEB4
superoxide-generating NADPH oxidase activator activity (GO:0016176)	0.842464	0.990187	1	PDGFB
phospholipase inhibitor activity (GO:0004859)	0.810477	0.990187	1	ANGPTL3
cAMP-dependent protein kinase inhibitor activity (GO:0004862)	0.522595	0.990187	2	PRKAR1A	PKIA
histone acetyltransferase activity (H4-K16 specific) (GO:0046972)	0.576568	0.990187	2	PHF20	KANSL1L
sequence-specific mRNA binding (GO:1990825)	0.810477	0.990187	1	ETF1
RNA polymerase II transcription coactivator activity (GO:0001105)	0.35967	0.990187	8	MEF2A	NCOA1	MKL2	TBX20	SOX11	BRCA1	SMARCA2	MED6
tau protein binding (GO:0048156)	0.810477	0.990187	1	CLU
myosin binding (GO:0017022)	0.396124	0.990187	9	ARFGEF1	RAB3B	RAB10	CXCR4	RAB39B	RAB27B	HAP1	RAB6A	TRIM32
transferase activity, transferring hexosyl groups (GO:0016758)	0.889894	0.990187	13	UGT2B10	ALG6	GBE1	B3GALT6	B3GALT5	FUT6	EXT2	MTAP	FUT9	KDELC2	HAS2	UGT2B4	B4GALT6
transcription factor activity, RNA polymerase II transcription factor recruiting (GO:0001135)	0.810477	0.990187	1	CDC5L
tubulin binding (GO:0015631)	0.870535	0.990187	37	MAP10	SETD2	KIF14	BRCA1	KIF11	IFT74	BCL2L11	KIF5C	KIF3A	FAM110C	KIF5B	BLOC1S2	TPR	KRIT1	ZNF207	KIF1C	TPPP	RAE1	CLASP2	AGTPBP1	SGIP1	RCC2	PIFO	CCSAP	LRPPRC	DNM3	TTLL7	AGBL5	AGBL4	APC	KIF26B	DCX	BIRC5	TUBGCP4	FGF13	DNAL1	PAFAH1B1
phospholipase binding (GO:0043274)	0.771998	0.990187	1	PAFAH1B1
syntaxin binding (GO:0019905)	0.566262	0.990187	13	UNC13B	NSF	UNC13C	SYT2	STXBP3	STX7	SYT16	C2CD4A	SYT9	STXBP5L	STXBP5	LLGL1	PTPN2
phosphoserine residue binding (GO:0050815)	0.725709	0.990187	1	RTF1
copper ion binding (GO:0005507)	0.859231	0.990187	5	HEPH	DCT	ANG	PRND	ATOX1
tropomyosin binding (GO:0005523)	0.476439	0.990187	3	NEBL	CALD1	LMOD2
protein kinase binding (GO:0019901)	0.407636	0.990187	86	TOP2A	DDR1	PDE3B	KIF14	DUSP19	KIF11	NR3C1	RND2	RND3	BICD1	PPP1CB	PPP1CC	ZFP36	TRIM5	ITGAV	EPHB1	ROS1	YWHAG	EPHB4	TRIM22	DACT1	APPL1	EPHB3	NSF	PPP1R12A	DUSP3	EPHA6	MUSK	PIFO	RHOH	PAX6	AVPR1A	YWHAZ	TIRAP	EEF1A1	DNAJC3	KAT2B	SIKE1	PRKAR1A	TRAF6	DCX	SIK1	ROR1	SMCR8	CD226	ROR2
semaphorin receptor activity (GO:0017154)	0.891157	0.990187	1	PLXNA3
metallopeptidase activity (GO:0008237)	0.681676	0.990187	16	MME	LNPEP	OMA1	IDE	MYSM1	NLN	ADAMTS5	ADAM17	ADAMTS3	FAP	ADAM12	YME1L1	PMPCB	MMP19	METAP1	PAPPA2
high voltage-gated calcium channel activity (GO:0008331)	0.909529	0.990187	1	CACNB2
ligand-gated cation channel activity (GO:0099094)	0.829863	0.990187	8	GRIA2	GRIN2A	KCNJ10	GRIN3A	KCNJ15	GRIN2B	KCNJ2	KCNJ3
NADH dehydrogenase activity (GO:0003954)	0.891157	0.990187	1	NDUFS1
pyrophosphatase activity (GO:0016462)	0.414807	0.990187	8	ENTPD1	ENTPD5	ENTPD7	BNIP2	ENPP1	NUDT3	DCP2	NUDT4
carbonate dehydratase activity (GO:0004089)	0.909529	0.990187	1	CA13
MHC protein binding (GO:0042287)	0.791897	0.990187	3	2019-03-01	TUBB	ATP5A1	TAPBP
lipid phosphatase activity (GO:0042577)	0.891157	0.990187	1	EPHX2
peptide alpha-N-acetyltransferase activity (GO:0004596)	0.891157	0.990187	1	NAA50
nitric-oxide synthase binding (GO:0050998)	0.625923	0.990187	2	DNM3	ATP2B4
acetyl-CoA C-acyltransferase activity (GO:0003988)	0.725709	0.990187	1	HADHB
UDP-galactose:beta-N-acetylglucosamine beta-1,3-galactosyltransferase activity (GO:0008499)	0.909529	0.990187	1	B3GALT5
G-protein coupled chemoattractant receptor activity (GO:0001637)	0.522102	0.990187	3	CX3CR1	CCR4	CMKLR1
calcium-dependent protein serine/threonine kinase activity (GO:0009931)	0.891157	0.990187	1	CAMK4
aldehyde dehydrogenase [NAD(P)+] activity (GO:0004030)	0.725709	0.990187	1	ALDH1A3
complement component C1q binding (GO:0001849)	0.522595	0.990187	2	CRP	CD93
1-phosphatidylinositol 4-kinase activity (GO:0004430)	0.725709	0.990187	1	PI4K2A
G-protein coupled receptor activity (GO:0004930)	0.778347	0.990187	41	GPR27	PTGER4	PTGFR	CALCRL	GPR65	C5AR2	C5AR1	GPR63	LPAR1	CXCR4	HTR2C	GPR83	FPR3	FPR2	RORB	TSKU	GRM1	CYSLTR1	CYSLTR2	FRZB	CNR1	S1PR1	KISS1R	CCR7	S1PR2	CMKLR1	GHSR	FZD3	GPR15	FZD5	GLP2R	F2R	GPR1	GPR75	AVPR1A	SSTR2	OPN5	TSHR	SFRP2	NMUR2	XPR1
co-SMAD binding (GO:0070410)	0.869054	0.990187	1	SMAD2
non-membrane spanning protein tyrosine kinase activity (GO:0004715)	0.775281	0.990187	6	FER	YES1	PEAK1	TNK1	SLA	FRK
urate transmembrane transporter activity (GO:0015143)	0.522595	0.990187	2	SLC2A9	SLC22A9
microtubule motor activity (GO:0003777)	0.908592	0.990187	7	KIF5C	KIF3A	KIF26B	KIF5B	KIF14	KIF1C	KIF11
oxidized purine DNA binding (GO:0032357)	0.869054	0.990187	1	MSH3
protein transporter activity (GO:0008565)	0.5064	0.990187	14	DNAJC19	TSNAX	VPS29	IPO11	CALCRL	COX18	DNAJC15	RANBP6	IPO7	CTAGE5	KPNA4	TNPO1	TNPO3	KPNB1
mechanically-gated ion channel activity (GO:0008381)	0.725709	0.990187	1	PIEZO2
translation elongation factor activity (GO:0003746)	0.710989	0.990187	2	EEF1A1	GFM1
endonuclease activity (GO:0004519)	0.896641	0.990187	9	TSNAX	GEN1	PIWIL2	RCL1	ANG	DICER1	N4BP2	TSN	LRPPRC
fatty-acyl-CoA synthase activity (GO:0004321)	0.401685	0.990187	2	ACSM2A	ACSM2B
NADP binding (GO:0050661)	0.618155	0.990187	5	DPYD	NOX5	CBR4	NOX1	CRYZ
U3 snoRNA binding (GO:0034511)	0.725709	0.990187	1	DIEXF
LBD domain binding (GO:0050693)	0.725709	0.990187	1	PROX1
ATP-dependent microtubule motor activity (GO:1990939)	0.599721	0.990187	8	DYNC2LI1	KIF5C	KIF3A	KIF5B	KIF14	KIF1C	KIF11	DYNLL2
scavenger receptor activity (GO:0005044)	0.522024	0.990187	4	SCARB2	MSR1	ACKR3	CD36
sulfate transmembrane transporter activity (GO:0015116)	0.670682	0.990187	2	SLC26A7	SLC26A9
cation channel activity (GO:0005261)	0.345869	0.990187	27	SLC24A2	KCNK5	CATSPER2	PSEN1	PKD2	NALCN	PIEZO2	SCN7A	TRPM7	TMEM38A	TMEM38B	SCN3A	TRPM6	TRPM3	SCN1A	TRPC3	TRPC4	TRPC1	ABCC9	ANO6	TMCO1	P2RX7	CACNB2	NOX5	SCN2A	MCU	HCN1
MAP kinase phosphatase activity (GO:0033549)	0.522595	0.990187	2	DUSP2	DUSP3
cation:chloride symporter activity (GO:0015377)	0.842464	0.990187	1	SLC12A1
phosphotyrosine residue binding (GO:0001784)	0.587434	0.990187	5	YES1	SHC3	SH3BP2	PTPN5	SAMSN1
CDP-alcohol phosphatidyltransferase activity (GO:0017169)	0.771998	0.990187	1	CDS1
ATPase activity, coupled to transmembrane movement of ions, rotational mechanism (GO:0044769)	0.66084	0.990187	4	ATP5A1	ATP5G1	ATP6V1C1	ATP6V1C2
monovalent cation:proton antiporter activity (GO:0005451)	0.476439	0.990187	3	SLC9A4	SLC9C2	SLC9B2
aminoacyl-tRNA ligase activity (GO:0004812)	0.859231	0.990187	5	DARS	TARSL2	DARS2	FARSB	WARS2
MAP kinase kinase kinase kinase activity (GO:0008349)	0.625923	0.990187	2	STK24	TNIK
inositol tetrakisphosphate phosphatase activity (GO:0052743)	0.842464	0.990187	1	MINPP1
alpha-tubulin binding (GO:0043014)	0.690908	0.990187	4	TTLL7	SETD2	FAM110C	DNAL1
cAMP response element binding protein binding (GO:0008140)	0.810477	0.990187	1	SIK1
neuropeptide Y receptor activity (GO:0004983)	0.771998	0.990187	1	NPY1R
aldo-keto reductase (NADP) activity (GO:0004033)	0.891475	0.990187	2	AKR1C2	AKR1C4
single-stranded DNA-dependent ATPase activity (GO:0043142)	0.670682	0.990187	2	DNA2	POLK
alditol:NADP+ 1-oxidoreductase activity (GO:0004032)	0.670682	0.990187	2	AKR1C2	AKR1C4
O-methyltransferase activity (GO:0008171)	0.747074	0.990187	2	BCDIN3D	CMTR2
phosphatidylinositol-3,5-bisphosphate binding (GO:0080025)	0.743042	0.990187	3	SESTD1	MAPKAP1	WIPI2
growth factor activity (GO:0008083)	0.651138	0.990187	11	CNTF	BDNF	ANGPTL3	OSM	PDGFB	NDP	INHBA	F2	FGF2	TDGF1	FGF10
L-glutamate transmembrane transporter activity (GO:0005313)	0.747074	0.990187	2	SLC1A1	SLC25A12
adenylate kinase activity (GO:0004017)	0.771998	0.990187	1	AK4
neutral amino acid transmembrane transporter activity (GO:0015175)	0.628843	0.990187	4	SLC38A1	SLC36A2	SLC1A1	SLC36A4
vascular endothelial growth factor receptor binding (GO:0005172)	0.842464	0.990187	1	ITGB3
nucleoside kinase activity (GO:0019206)	0.747074	0.990187	2	CMPK1	UPRT
RNA polymerase II activity (GO:0001055)	0.891157	0.990187	1	POLR2F
exoribonuclease activity, producing 5'-phosphomonoesters (GO:0016896)	0.838999	0.990187	3	CNOT7	PDE12	DCP2
carboxylic ester hydrolase activity (GO:0052689)	0.390695	0.990187	19	NLGN1	PLA2G12A	PLA2G2D	PGAP1	NLGN2	DAGLA	PLA2G4D	PON2	ABHD2	C2ORF66	LIPA	PLA2G16	FAM135B	FAM135A	AADAC	PTRH2	MGLL	PAFAH1B2	PAFAH1B1
hydrolase activity, acting on acid anhydrides, catalyzing transmembrane movement of substances (GO:0016820)	0.442344	0.990187	8	ABCA10	ABCB1	ABCA5	ABCA6	ABCB5	ABCC9	ABCB11	ABCG2
NAD+ binding (GO:0070403)	0.810477	0.990187	1	SIRT5
snoRNA binding (GO:0030515)	0.618155	0.990187	5	NOP58	UTP6	NUFIP1	DIEXF	NUDT4
endocytic adaptor activity (GO:0098748)	0.869054	0.990187	1	AP2B1
phosphatidylinositol phosphate binding (GO:1901981)	0.904378	0.990187	10	OSBPL8	SNX27	MYO10	SESTD1	MAPKAP1	SAP30L	LANCL2	WIPI2	SNX11	IQGAP2
1-acylglycerol-3-phosphate O-acyltransferase activity (GO:0003841)	0.855031	0.990187	2	LPCAT1	AGPAT4
alcohol dehydrogenase (NAD) activity (GO:0004022)	0.810477	0.990187	1	ADH6
phosphatidylinositol phospholipase C activity (GO:0004435)	0.628843	0.990187	4	CHRM3	EDNRA	PLCB4	BDKRB2
cytokine receptor binding (GO:0005126)	0.909979	0.990187	18	SMAD2	GDF11	TGFB2	BMP10	USP15	CNTF	IL31	TSLP	OSM	INHBA	GDF5	IFNW1	BMP5	BMP4	ADAM17	IL23A	TNFSF4	IFNE
RNA methyltransferase activity (GO:0008173)	0.874468	0.990187	2	BCDIN3D	TRDMT1
oxidoreductase activity, acting on the CH-NH group of donors, NAD or NADP as acceptor (GO:0016646)	0.644585	0.990187	3	MTHFD2	MTHFD2L	AASS
tubulin-glutamic acid ligase activity (GO:0070740)	0.771998	0.990187	1	TTLL7
phosphatase inhibitor activity (GO:0019212)	0.644585	0.990187	3	SET	ANP32E	ARPP19
5'-3' exonuclease activity (GO:0008409)	0.779213	0.990187	2	POLK	DCP2
phosphotransferase activity, phosphate group as acceptor (GO:0016776)	0.578035	0.990187	7	DLG2	PPIP5K2	MAGI3	CMPK1	CMPK2	AK4	NME1
nucleoside-triphosphatase activity (GO:0017111)	0.556932	0.990187	71	RAB3B	HBS1L	GFM1	KIF14	KIF11	RND2	RND3	RAB22A	MT-ATP6	RAB44	KIF5C	KIF5B	KIF1C	RAB2A	NSF	ENTPD1	ATRX	ENTPD7	RHOH	CLPX	RAB33B	DNM3	EEF1A1	RAB30	DDX19B	KATNAL1	RAB37	KATNAL2	RRAGD	RAB38	DNA2	PFN2	RAB1A	ATL3	HSPA4L	VPS4A	ATP5A1	GNAI3	ARL1	RHOBTB3	ATP1A2	GNAI1	GSPT1	NUGGC	RAB40A	RHOT1
[truncated: 220 more rows]
[truncated: 224 more columns]
