# Supplementary material for: Effects of Cardiac Sympathetic Neurodegeneration and PPARγ Activation on Rhesus Macaque Whole Blood miRNA and mRNA Expression Profiles
Source: Biomed Res Int. 2020 May 2;2020:9426204. doi: 10.1155/2020/9426204 (PMC7212295; doi:10.1155/2020/9426204)
Supplement: Supplementary 5 — Supplementary Table 4: differentially expressed small RNAs. [file 9426204.f13.xlsx]

## Sheet: Sheet1
	Baseline Placebo v. Pioglitazone			1wk Placebo v. Pioglitazone			12wk Placebo v. Pioglitazone			Placebo Baseline v. 1wk			Placebo Baseline v. 12wk			Pioglitazone Baseline v. 1wk			Pioglitazone Baseline v. 12wk
Gene	uncorrected p value	FDR corrected p value	Fold Change	uncorrected p value	FDR corrected p value	Fold Change	uncorrected p value	FDR corrected p value	Fold Change	uncorrected p value	FDR corrected p value	Fold Change	uncorrected p value	FDR corrected p value	Fold Change	uncorrected p value	FDR corrected p value	Fold Change	uncorrected p value	FDR corrected p value	Fold Change
AIMP1	0.957	0.99531	-1.00723	0.011	0.924557	-1.50055	0.872	0.998	1.02184	0.044	0.92241	1.24972	0.867	0.9724	1.00629	0.148	0.24192	-1.19209	0.742	0.814815	1.0357
BMP2	0.694	0.861474	-1.18094	0.988	0.988	-1.33905	0.425	0.998	-1.70695	0.688	0.92241	-1.09396	0.701	0.9724	-1.09503	0.195	0.24192	-1.24042	0.217	0.468651	-1.58277
CCL1	0.448	0.690345	1.60902	0.83	0.924557	-1.0725	0.602	0.998	-1.06079	0.678	0.92241	-1.01285	0.683	0.9724	1.34744	0.072	0.24192	-1.74785	0.225	0.468651	-1.26672
CCL11	0.628	0.821333	1.39064	0.177	0.924557	-1.0725	0.722	0.998	-1.14452	0.342	0.92241	-1.01285	0.147	0.9724	1.16055	0.34	0.24192	-1.51063	0.367	0.566596	-1.37144
CCL13	0.455	0.690345	1.09671	0.83	0.924557	-1.59763	0.602	0.998	-1.11773	0.66	0.92241	-1.038	0.698	0.9724	-1.44633	0.071	0.24192	-1.81872	0.226	0.468651	-1.77293
CCL17	0.363	0.690345	1.37787	0.83	0.924557	-1.0725	0.725	0.998	-1.14452	0.863	0.92241	-1.02224	0.762	0.9724	1.14989	0.111	0.24192	-1.51063	0.277	0.4928	-1.37144
CCL2	0.477	0.711458	-1.01733	0.9	0.954217	-2.07949	0.666	0.998	-2.49067	0.59	0.92241	1.27782	0.751	0.9724	2.07426	0.09	0.24192	-1.59965	0.265	0.487667	-1.1803
CCL20	0.625	0.821333	1.31089	0.914	0.957524	1.00398	0.514	0.998	-1.09874	0.126	0.92241	-1.07448	0.772	0.9724	1.09399	0.277	0.24192	-1.40294	0.45	0.628571	-1.31658
CCL23	0.448	0.690345	2.19131	0.83	0.924557	1.62303	0.602	0.998	2.27152	0.678	0.92241	1.50855	0.683	0.9724	-1.39779	0.072	0.24192	1.11733	0.225	0.468651	-1.34843
CCL26	0.967	0.99531	1.39064	0.201	0.924557	-1.0725	0.113	0.998	-1.14452	0.331	0.92241	-1.01285	0.063	0.9724	1.16055	0.305	0.24192	-1.51063	0.881	0.922952	-1.37144
CCL5	0.616	0.821333	1.17198	0.643	0.924557	1.10612	0.531	0.998	-1.26938	0.339	0.92241	-1.24383	0.093	0.9724	1.26447	0.145	0.24192	-1.31788	0.313	0.519698	-1.17652
CCL7	0.73	0.861474	1.07782	0.948	0.981459	-1.26667	0.587	0.998	-1.11484	0.391	0.92241	1.94141	0.949	0.99419	1.05624	0.363	0.24192	1.42203	0.412	0.604267	-1.13762
CCR1	0.246	0.690345	1.55043	0.756	0.924557	1.18734	0.769	0.998	1.07013	0.866	0.92241	-1.04144	0.789	0.9724	-1.28073	0.433	0.24192	-1.35991	0.213	0.468651	-1.85555
CCR3	0.743	0.861474	1.08455	0.649	0.924557	-1.14637	0.261	0.998	-1.47057	0.924	0.950605	1.17545	0.221	0.9724	1.69351	0.338	0.24192	-1.05773	0.615	0.751667	1.06182
CCR4	0.14	0.690345	1.80259	0.344	0.924557	1.23031	0.213	0.998	-1.40233	0.814	0.92241	1.00672	0.728	0.9724	1.10865	0.081	0.24192	-1.45538	0.013	0.2288	-2.28008
CCR6	0.183	0.690345	1.78002	0.567	0.924557	1.08452	0.56	0.998	-1.2364	0.703	0.92241	-1.0958	0.823	0.9724	1.00276	0.025	0.24192	-1.79853	0.011	0.2288	-2.19475
CCR8	0.038	0.690345	2.71959	0.155	0.924557	2.07358	0.633	0.998	-1.28242	0.971	0.974	-1.02346	0.805	0.9724	1.09138	0.319	0.24192	-1.34231	0.001	0.088	-3.19563
CD40LG	0.404	0.690345	1.31742	0.549	0.924557	1.07969	0.224	0.998	-1.44204	0.446	0.92241	-1.11398	0.315	0.9724	1.25286	0.06	0.24192	-1.35925	0.113	0.468651	-1.51635
CD70	0.56	0.783619	-1.3681	0.043	0.924557	-1.54263	0.03	0.998	-2.06106	0.247	0.92241	-1.21762	0.712	0.9724	1.00196	0.226	0.24192	-1.37297	0.112	0.468651	-1.50357
CSF1	0.112	0.690345	2.41301	0.17	0.924557	1.8573	0.134	0.998	1.93242	0.791	0.92241	-1.15562	0.765	0.9724	1.11043	0.051	0.24192	-1.50139	0.286	0.49349	-1.12451
CSF2	0.448	0.690345	1.39064	0.495	0.924557	-1.18437	0.602	0.998	-1.14452	0.87	0.92241	1.0903	0.683	0.9724	1.16055	0.081	0.24192	-1.51063	0.225	0.468651	-1.37144
CX3CL1	0.448	0.690345	1.39064	0.83	0.924557	-1.0725	0.602	0.998	-1.14452	0.678	0.92241	-1.01285	0.683	0.9724	1.16055	0.072	0.24192	-1.51063	0.225	0.468651	-1.37144
CX3CR1	0.299	0.690345	1.65487	0.48	0.924557	1.25652	0.759	0.998	1.11992	0.974	0.974	-1.10008	0.445	0.9724	1.31677	0.125	0.24192	-1.44884	0.229	0.468651	-1.12219
CXCL11	0.644	0.821333	1.16514	0.505	0.924557	1.20107	0.561	0.998	-1.09724	0.62	0.92241	-1.19035	0.562	0.9724	1.18963	0.726	0.24192	-1.15474	0.53	0.675942	-1.07466
CXCL12	0.983	0.99531	1.24929	0.607	0.924557	1.05494	0.998	0.998	-1.10619	0.333	0.92241	-1.09155	0.707	0.9724	1.21536	0.608	0.24192	-1.29265	0.74	0.814815	-1.13707
CXCL13	0.93	0.986024	-1.01344	0.584	0.924557	-1.34792	0.944	0.998	1.01179	0.756	0.92241	-1.05072	1	1	-1.19	0.248	0.252	-1.39751	0.978	0.989	-1.16054
CXCL6	0.923	0.986024	1.07632	0.344	0.924557	-1.13146	0.829	0.998	1.06707	0.487	0.92241	-1.26924	0.421	0.9724	-1.55607	0.041	0.252	-1.54569	0.521	0.674235	-1.56956
CXCL8	0.455	0.690345	-1.12639	0.672	0.924557	1.49257	0.589	0.998	1.69946	0.038	0.92241	-1.96867	0.281	0.9724	-1.97277	0.64	0.26069	-1.17098	0.75	0.814815	-1.03057
CXCL9	0.285	0.690345	1.75287	0.043	0.924557	2.15761	0.76	0.998	-1.0283	0.609	0.92241	-1.06041	0.593	0.9724	1.33069	0.914	0.26069	1.16078	0.134	0.468651	-1.35454
CXCR1	0.561	0.783619	1.322	0.593	0.924557	1.43032	0.97	0.998	1.11507	0.176	0.92241	-1.48029	0.437	0.9724	-1.49616	0.1	0.26775	-1.36819	0.187	0.468651	-1.77381
CXCR2	0.386	0.690345	1.39953	0.291	0.924557	1.53187	0.934	0.998	1.09683	0.049	0.92241	-1.70784	0.61	0.9724	-1.37771	0.024	0.26775	-1.5603	0.165	0.468651	-1.75793
CXCR4	0.735	0.861474	1.04258	0.56	0.924557	1.12705	0.801	0.998	1.01933	0.181	0.92241	-1.35365	0.867	0.9724	-1.25103	0.13	0.26775	-1.25221	0.398	0.593627	-1.27958
FASLG	0.705	0.861474	1.08607	0.775	0.924557	1.26933	0.854	0.998	1.04633	0.537	0.92241	-1.36103	0.204	0.9724	1.20968	0.296	0.282545	-1.16453	0.681	0.79904	1.16541
IFNA2	0.448	0.690345	1.39064	0.83	0.924557	-1.0725	0.602	0.998	-1.14452	0.678	0.92241	-1.01285	0.683	0.9724	1.16055	0.072	0.305667	-1.51063	0.225	0.468651	-1.37144
IFNG	0.307	0.690345	1.78324	0.325	0.924557	1.47933	0.355	0.998	1.66124	0.781	0.92241	-1.37658	0.814	0.9724	1.08982	0.102	0.305667	-1.65937	0.24	0.478261	1.01526
IL10RA	0.297	0.690345	1.36898	0.111	0.924557	1.57844	0.328	0.998	1.35516	0.343	0.92241	-1.28259	0.376	0.9724	-1.37061	0.534	0.305667	-1.11239	0.554	0.696457	-1.38459
IL10RB	0.266	0.690345	1.24837	0.467	0.924557	1.23173	0.694	0.998	1.16752	0.379	0.92241	-1.2048	0.879	0.9724	-1.20782	0.17	0.318769	-1.22108	0.726	0.814815	-1.29146
IL11RA	0.175	0.690345	1.52219	0.183	0.924557	1.40939	0.551	0.998	-1.19962	0.748	0.92241	-1.08587	0.434	0.9724	1.13675	0.215	0.318769	-1.17278	0.031	0.454667	-1.60638
IL12B	0.92	0.986024	-1.06287	0.987	0.988	-1.03378	0.964	0.998	-1.10576	0.829	0.92241	-1.24722	0.279	0.9724	-1.37551	0.893	0.318769	-1.21308	0.352	0.5632	-1.43101
IL12RB1	0.072	0.690345	1.77436	0.259	0.924557	1.38555	0.317	0.998	1.39352	0.647	0.92241	1.13761	0.982	0.996322	-1.06421	0.582	0.333951	-1.12571	0.146	0.468651	-1.35506
IL12RB2	0.132	0.690345	2.65727	0.278	0.924557	1.51614	0.957	0.998	1.16656	0.616	0.92241	1.27189	0.197	0.9724	1.59188	0.065	0.333951	-1.37799	0.118	0.468651	-1.43093
IL13	0.914	0.986024	1.22214	0.315	0.924557	-1.37375	0.417	0.998	-1.25323	0.682	0.92241	1.0311	0.702	0.9724	1.08763	0.263	0.336	-1.62827	0.25	0.478261	-1.40821
IL13RA2	0.448	0.690345	1.39064	0.83	0.924557	-1.0725	0.602	0.998	-1.14452	0.678	0.92241	-1.01285	0.683	0.9724	1.16055	0.072	0.336	-1.51063	0.225	0.468651	-1.37144
IL15	0.523	0.754492	1.19341	0.484	0.924557	1.17934	0.363	0.998	1.30366	0.42	0.92241	-1.30129	0.642	0.9724	-1.13669	0.16	0.336	-1.31682	0.495	0.661333	-1.04056
IL15RA	0.207	0.690345	1.58505	0.359	0.924557	1.30969	0.57	0.998	1.14091	0.899	0.94181	1.03807	0.737	0.9724	1.08221	0.386	0.364	-1.16586	0.083	0.468651	-1.28375
IL16	0.296	0.690345	1.30436	0.288	0.924557	1.23727	0.845	0.998	-1.08213	0.148	0.92241	-1.15464	0.811	0.9724	1.003	0.05	0.386043	-1.21725	0.426	0.611742	-1.40727
IL17A	0.448	0.690345	1.39064	0.83	0.924557	-1.0725	0.602	0.998	-1.14452	0.678	0.92241	-1.01285	0.683	0.9724	1.16055	0.072	0.386043	-1.51063	0.225	0.468651	-1.37144
IL17F	0.696	0.861474	-1.25464	0.677	0.924557	1.12348	0.468	0.998	-1.38393	0.165	0.92241	-1.48949	0.279	0.9724	-1.7257	0.66	0.3955	-1.05671	0.164	0.468651	-1.90353
IL1A	0.373	0.690345	1.54134	0.427	0.924557	1.20009	0.78	0.998	1.00311	0.68	0.92241	-1.05683	0.689	0.9724	1.21085	0.098	0.400615	-1.35735	0.188	0.468651	-1.26899
IL1B	0.267	0.690345	1.37827	0.553	0.924557	1.25668	0.997	0.998	1.12412	0.425	0.92241	-1.29554	0.694	0.9724	-1.01548	0.141	0.400615	-1.4209	0.696	0.805895	-1.24506
IL1R1	0.744	0.861474	3.17253	0.614	0.924557	3.53016	0.591	0.998	2.70813	0.147	0.92241	-1.30813	0.407	0.9724	-1.32964	0.411	0.400615	-1.17561	0.347	0.5632	-1.55765
IL1R2	0.424	0.690345	1.88974	0.121	0.924557	2.50406	0.563	0.998	1.50498	0.626	0.92241	-1.09093	0.703	0.9724	-1.19524	0.307	0.400615	1.21464	0.598	0.741183	-1.50082
IL1RN	0.326	0.690345	1.52596	0.339	0.924557	1.39174	0.476	0.998	1.23423	0.621	0.92241	-1.14057	0.884	0.9724	-1.12814	0.245	0.41683	-1.25057	0.708	0.809143	-1.39479
IL2	0.351	0.690345	1.46534	0.741	0.924557	-1.05762	0.469	0.998	1.00757	0.797	0.92241	1.02603	0.946	0.99419	1.16055	0.045	0.430889	-1.51046	0.112	0.468651	-1.25315
IL20	0.396	0.690345	1.41873	0.423	0.924557	-1.20822	0.109	0.998	-1.28144	0.32	0.92241	-1.0498	0.369	0.9724	1.03798	0.486	0.452073	-1.7995	0.295	0.499231	-1.7515
IL21	0.411	0.690345	-1.46968	0.878	0.954217	-1.39194	0.994	0.998	-2.28283	0.775	0.92241	-1.378	0.639	0.9724	1.0201	0.087	0.452421	-1.30511	0.362	0.566596	-1.52269
IL2RA	0.06	0.690345	1.50663	0.339	0.924557	1.2143	0.997	0.998	-1.08708	0.712	0.92241	1.10406	0.772	0.9724	-1.03857	0.647	0.452421	-1.12379	0.007	0.205333	-1.701
IL2RB	0.16	0.690345	1.82626	0.118	0.924557	2.17875	0.592	0.998	1.33389	0.856	0.92241	-1.22632	0.49	0.9724	-1.04016	0.958	0.454169	-1.02792	0.63	0.759452	-1.42411
IL2RG	0.238	0.690345	1.48283	0.4	0.924557	1.20838	0.687	0.998	-1.07225	0.453	0.92241	-1.09977	0.255	0.9724	1.1889	0.017	0.454169	-1.34955	0.068	0.468651	-1.33734
IL3	0.76	0.868571	1.33113	0.896	0.954217	-1.03532	0.383	0.998	-1.34192	0.519	0.92241	-1.02383	0.946	0.99419	1.16509	0.248	0.468197	-1.41099	0.222	0.468651	-1.53316
IL4	0.984	0.99531	1.2157	0.583	0.924557	-1.14728	0.858	0.998	-1.16155	0.81	0.92241	1.12851	0.702	0.9724	1.43071	0.527	0.468197	-1.23592	0.862	0.913928	1.01318
IL5	0.448	0.690345	1.39064	0.83	0.924557	-1.0725	0.602	0.998	-1.14452	0.678	0.92241	-1.01285	0.683	0.9724	1.16055	0.072	0.491806	-1.51063	0.225	0.468651	-1.37144
IL5RA	0.418	0.690345	1.2471	0.817	0.924557	1.0503	0.13	0.998	-1.63087	0.761	0.92241	1.12538	0.248	0.9724	1.58819	0.377	0.494812	-1.05508	0.266	0.487667	-1.28061
IL6	0.169	0.690345	3.41297	0.203	0.924557	2.25671	0.076	0.998	1.96247	0.783	0.92241	-1.04903	0.877	0.9724	1.09147	0.045	0.494812	-1.58652	0.104	0.468651	-1.59337
IL6R	0.638	0.821333	1.19439	0.717	0.924557	1.25418	0.863	0.998	-1.09083	0.426	0.92241	-1.27871	0.546	0.9724	-1.27881	0.376	0.498831	-1.21775	0.466	0.64075	-1.66613
IL7	0.433	0.690345	1.22793	0.894	0.954217	-1.02976	0.731	0.998	-1.14166	0.823	0.92241	-1.16885	0.347	0.9724	1.11548	0.131	0.523091	-1.47799	0.431	0.611742	-1.25675
IL9	0.418	0.690345	1.45281	0.822	0.924557	-1.07533	0.602	0.998	-1.14452	0.675	0.92241	-1.01018	0.681	0.9724	1.16055	0.059	0.542866	-1.57816	0.202	0.468651	-1.43275
IL9R	0.254	0.690345	1.56988	0.309	0.924557	1.31531	0.926	0.998	1.06434	0.794	0.92241	-1.05301	0.854	0.9724	1.00871	0.676	0.600353	-1.25681	0.176	0.468651	-1.46226
LOC710618	0.448	0.690345	1.39064	0.83	0.924557	-1.0725	0.602	0.998	-1.14452	0.678	0.92241	-1.01285	0.683	0.9724	1.16055	0.072	0.6408	-1.51063	0.225	0.468651	-1.37144
LTA	0.333	0.690345	1.48271	0.467	0.924557	1.21163	0.643	0.998	-1.08871	0.484	0.92241	-1.1865	0.964	0.996322	1.01995	0.163	0.6408	-1.45195	0.005	0.205333	-1.58268
MIF	0.199	0.690345	1.36443	0.44	0.924557	1.10985	0.524	0.998	-1.1196	0.782	0.92241	-1.02363	0.39	0.9724	1.134	0.028	0.688563	-1.25843	0.048	0.468651	-1.3471
NAMPT	0.426	0.690345	-1.17537	0.977	0.988	1.11853	0.921	0.998	-1.06803	0.012	0.92241	-1.63661	0.372	0.9724	-1.5213	0.234	0.709333	-1.24487	0.975	0.989	-1.38236
OSM	0.418	0.690345	1.3345	0.72	0.924557	1.17052	0.326	0.998	1.59073	0.929	0.950605	-1.33781	0.474	0.9724	-1.49719	0.175	0.723781	-1.52524	0.496	0.661333	-1.25603
PF4	0.841	0.945721	1.33507	0.537	0.924557	1.22464	0.28	0.998	-1.76709	0.468	0.92241	1.06681	0.579	0.9724	1.28842	0.717	0.72464	-1.02189	0.05	0.468651	-1.83107
SPP1	0.418	0.690345	-3.64125	0.478	0.924557	-2.24297	0.946	0.998	-1.63098	0.198	0.92241	-1.77163	0.184	0.9724	-2.08161	0.878	0.72464	-1.0913	0.964	0.989	1.07251
TNF	0.33	0.690345	1.48186	0.474	0.924557	1.33507	0.63	0.998	-1.03405	0.427	0.92241	-1.36579	0.806	0.9724	-1.03081	0.049	0.729077	-1.51596	0.06	0.468651	-1.57953
TNFRSF11B	0.487	0.714267	1.29917	0.83	0.924557	-1.0725	0.602	0.998	-1.14452	0.57	0.92241	-1.08416	0.761	0.9724	1.08421	0.066	0.729077	-1.51063	0.215	0.468651	-1.37144
TNFSF10	0.849	0.945721	1.07742	0.363	0.924557	1.17566	0.914	0.998	1.00699	0.144	0.92241	-1.2521	0.841	0.9724	-1.03281	0.317	0.729077	-1.14747	0.834	0.895024	-1.10505
TNFSF11	0.271	0.690345	1.5516	0.392	0.924557	-1.6786	0.805	0.998	-1.26945	0.288	0.92241	1.45759	0.399	0.9724	1.51039	0.04	0.7623	-1.78687	0.516	0.674235	-1.30409
TNFSF13B	0.176	0.690345	1.46529	0.108	0.924557	1.56967	0.41	0.998	1.55806	0.457	0.92241	-1.15674	0.985	0.996322	-1.17021	0.629	0.7623	-1.07982	0.679	0.79904	-1.10053
TNFSF14	0.087	0.690345	1.46628	0.241	0.924557	1.4904	0.734	0.998	1.05817	0.334	0.92241	-1.38379	0.731	0.9724	-1.20068	0.216	0.910519	-1.36139	0.153	0.468651	-1.66375
TNFSF4	0.178	0.690345	1.90367	0.296	0.924557	1.7116	0.809	0.998	1.13949	0.115	0.92241	-1.55765	0.769	0.9724	-1.26885	0.004	0.91478	-1.73244	0.05	0.468651	-2.11978
VEGFA	0.341	0.690345	1.61081	0.032	0.924557	2.05281	0.89	0.998	-1.17838	0.729	0.92241	-1.18067	0.924	0.99419	-1.08395	0.677	0.925012	1.07938	0.28	0.4928	-2.05751
XCL1	0.601	0.821333	1.43783	0.387	0.924557	1.39396	0.832	0.998	1.23905	0.288	0.92241	-1.23114	0.393	0.9724	1.25	0.176	0.958	-1.26988	0.989	0.989	1.07719

## Sheet: Sheet2
		AIMP1				AIMP1	1.0357
		BMP2				BMP2	-1.58277
		CCL1				CCL1	-1.26672
		CCL11				CCL11	-1.37144
		CCL13				CCL13	-1.77293
		CCL17				CCL17	-1.37144
		CCL2				CCL2	-1.1803
		CCL20				CCL20	-1.31658
		CCL23				CCL23	-1.34843
		CCL26				CCL26	-1.37144
		CCL5				CCL5	-1.17652
		CCL7				CCL7	-1.13762
		CCR1				CCR1	-1.85555
		CCR3				CCR3	1.06182
		CCR4				CCR4	-2.28008
		CCR6				CCR6	-2.19475
		CCR8				CCR8	-3.19563
		CD40LG				CD40LG	-1.51635
		CD70				CD70	-1.50357
		CSF1				CSF1	-1.12451
		CSF2				CSF2	-1.37144
		CX3CL1				CX3CL1	-1.37144
		CX3CR1				CX3CR1	-1.12219
		CXCL11				CXCL11	-1.07466
		CXCL12				CXCL12	-1.13707
		CXCL13				CXCL13	-1.16054
		CXCL6				CXCL6	-1.56956
		CXCL8				CXCL8	-1.03057
		CXCL9				CXCL9	-1.35454
		CXCR1				CXCR1	-1.77381
		CXCR2				CXCR2	-1.75793
		CXCR4				CXCR4	-1.27958
		FASLG				FASLG	1.16541
		IFNA2				IFNA2	-1.37144
		IFNG				IFNG	1.01526
		IL10RA				IL10RA	-1.38459
		IL10RB				IL10RB	-1.29146
		IL11RA				IL11RA	-1.60638
		IL12B				IL12B	-1.43101
		IL12RB1				IL12RB1	-1.35506
		IL12RB2				IL12RB2	-1.43093
		IL13				IL13	-1.40821
		IL13RA2				IL13RA2	-1.37144
		IL15				IL15	-1.04056
		IL15RA				IL15RA	-1.28375
		IL16				IL16	-1.40727
		IL17A				IL17A	-1.37144
		IL17F				IL17F	-1.90353
		IL1A				IL1A	-1.26899
		IL1B				IL1B	-1.24506
		IL1R1				IL1R1	-1.55765
		IL1R2				IL1R2	-1.50082
		IL1RN				IL1RN	-1.39479
		IL2				IL2	-1.25315
		IL20				IL20	-1.7515
		IL21				IL21	-1.52269
		IL2RA				IL2RA	-1.701
		IL2RB				IL2RB	-1.42411
		IL2RG				IL2RG	-1.33734
		IL3				IL3	-1.53316
		IL4				IL4	1.01318
		IL5				IL5	-1.37144
		IL5RA				IL5RA	-1.28061
		IL6				IL6	-1.59337
		IL6R				IL6R	-1.66613
		IL7				IL7	-1.25675
		IL9				IL9	-1.43275
		IL9R				IL9R	-1.46226
		LOC710618				LOC710618	-1.37144
		LTA				LTA	-1.58268
		MIF				MIF	-1.3471
		NAMPT				NAMPT	-1.38236
		OSM				OSM	-1.25603
		PF4				PF4	-1.83107
		SPP1				SPP1	1.07251
		TNF				TNF	-1.57953
		TNFRSF11B				TNFRSF11B	-1.37144
		TNFSF10				TNFSF10	-1.10505
		TNFSF11				TNFSF11	-1.30409
		TNFSF13B				TNFSF13B	-1.10053
		TNFSF14				TNFSF14	-1.66375
		TNFSF4				TNFSF4	-2.11978
		VEGFA				VEGFA	-2.05751
		XCL1				XCL1	1.07719
