# Supplementary material for: Effects of Cardiac Sympathetic Neurodegeneration and PPARγ Activation on Rhesus Macaque Whole Blood miRNA and mRNA Expression Profiles
Source: Biomed Res Int. 2020 May 2;2020:9426204. doi: 10.1155/2020/9426204 (PMC7212295; doi:10.1155/2020/9426204)
Supplement: Supplementary 6 — Supplementary Table 5: results of small RNA differential expression analysis between groups with all animals included (n = 10). [file 9426204.f14.xlsx]

## Sheet: Diff Exp Results
Gene	Repeated Measures ANOVA Post Hoc Test	Uncorrected p-value	FDR Corrected p-value	Fold Change
CD36	Placebo v. Pioglitazone Baseline	0.998	0.998	-1.03081
	Placebo v. Pioglitazone 1wk	0.224	0.924557	1.56167
	Placebo v. Pioglitazone 12wks	0.806	0.998	1.01234
	Piogltiazone Baseline v. 1wk	0.203	0.388348	1.1084
	Piogltiazone Baseline v. 12wk	0.09	0.468651	-1.87966
	Placebo Baseline v. 1wk	0.531	0.92241	-1.45236
	Placebo Baseline v. 12wk	0.06	0.9724	-1.9615
NFKBIA	Placebo v. Pioglitazone Baseline	0.31	0.690345	1.41521
	Placebo v. Pioglitazone 1wk	0.13	0.924557	1.66821
	Placebo v. Pioglitazone 12wks	0.624	0.998	-1.11039
	Piogltiazone Baseline v. 1wk	0.287	0.451	1.11244
	Piogltiazone Baseline v. 12wk	0.248	0.478261	-1.4388
	Placebo Baseline v. 1wk	0.629	0.92241	-1.05962
	Placebo Baseline v. 12wk	0.515	0.9724	1.09219
MAFB	Placebo v. Pioglitazone Baseline	0.024	0.690345	1.94429
	Placebo v. Pioglitazone 1wk	0.164	0.924557	1.5628
	Placebo v. Pioglitazone 12wks	0.571	0.998	1.33914
	Piogltiazone Baseline v. 1wk	0.97	0.97	-1.03266
	Piogltiazone Baseline v. 12wk	0.093	0.468651	-1.51011
	Placebo Baseline v. 1wk	0.608	0.92241	1.20476
	Placebo Baseline v. 12wk	0.866	0.9724	-1.0401
STAT1	Placebo v. Pioglitazone Baseline	0.171	0.690345	1.83491
	Placebo v. Pioglitazone 1wk	0.225	0.924557	1.46126
	Placebo v. Pioglitazone 12wks	0.559	0.998	1.37146
	Piogltiazone Baseline v. 1wk	0.454	0.570743	-1.27964
	Piogltiazone Baseline v. 12wk	0.393	0.593627	-1.27452
	Placebo Baseline v. 1wk	0.618	0.92241	-1.01906
	Placebo Baseline v. 12wk	0.782	0.9724	1.04974
