# Supplementary material for: Effects of Cardiac Sympathetic Neurodegeneration and PPARγ Activation on Rhesus Macaque Whole Blood miRNA and mRNA Expression Profiles
Source: Biomed Res Int. 2020 May 2;2020:9426204. doi: 10.1155/2020/9426204 (PMC7212295; doi:10.1155/2020/9426204)
Supplement: Supplementary 7 — Supplementary Table 6: results of small RNA differential expression analysis between groups without the outlier animal (n = 9). [file 9426204.f15.xlsx]

## Sheet: (A) mml-miR-16-2-3p
mml-miR-16-2-3p Predicted Target Genes	Full Gene Name	mRNAs Evaluated
FUT9	fucosyltransferase 9 (alpha (1,3) fucosyltransferase)	AIMP1
AL353791.1		BMP2
RORA	RAR-related orphan receptor A	CCL1
MOB1B	MOB kinase activator 1B	CCL11
RC3H2	ring finger and CCCH-type domains 2	CCL13
RGS17	regulator of G-protein signaling 17	CCL17
TSLP	thymic stromal lymphopoietin	CCL2
QKI	QKI, KH domain containing, RNA binding	CCL20
FAM133A	family with sequence similarity 133, member A	CCL23
C14orf39	chromosome 14 open reading frame 39	CCL5
RP11-944C7.1	Protein LOC100506792	CCR1
RP11-67H2.1	Uncharacterized protein	CCR3
ST8SIA1	ST8 alpha-N-acetyl-neuraminide alpha-2,8-sialyltransferase 1	CCR4
CHI3L2	chitinase 3-like 2	CCR6
AC024257.1	CDNA FLJ26186 fis, clone ADG04757; Uncharacterized protein	CCR8
B2M	beta-2-microglobulin	CD40LG
CADM2	cell adhesion molecule 2	CD70
KLHL8	kelch-like family member 8	CSF1
AC006967.1	Protein LOC100996426	CSF2
CNR1	cannabinoid receptor 1 (brain)	CX3CL1
LEAP2	liver expressed antimicrobial peptide 2	CX3CR1
WDR49	WD repeat domain 49	CXCL11
AGO3	argonaute RISC catalytic component 3	CXCL12
AUH	AU RNA binding protein/enoyl-CoA hydratase	CXCL13
B3GALT6	UDP-Gal:betaGal beta 1,3-galactosyltransferase polypeptide 6	CXCL6
CTNNAL1	catenin (cadherin-associated protein), alpha-like 1	CXCL9
SYT16	synaptotagmin XVI	CXCR1
CTRC	chymotrypsin C (caldecrin)	CXCR4
MYL1	myosin, light chain 1, alkali; skeletal, fast	FASLG
CD9	CD9 molecule	IFNA2
GMFB	glia maturation factor, beta	IFNG
USP16	ubiquitin specific peptidase 16	IL10RA
BDH2	3-hydroxybutyrate dehydrogenase, type 2	IL10RB
TEX30	testis expressed 30	IL11RA
HOXC12	homeobox C12	IL12B
CMTM7	CKLF-like MARVEL transmembrane domain containing 7	IL12RB1
PEX5L	peroxisomal biogenesis factor 5-like	IL12RB2
ZNF300	zinc finger protein 300	IL13
C2orf66	chromosome 2 open reading frame 66	IL15
AC117834.1		IL15RA
HORMAD1	HORMA domain containing 1	IL16
PIGP	phosphatidylinositol glycan anchor biosynthesis, class P	IL17A
SLC9C2	solute carrier family 9, member C2 (putative)	IL17F
C11orf1	chromosome 11 open reading frame 1	IL1A
MRPS22	mitochondrial ribosomal protein S22	IL1B
TUBB2B	tubulin, beta 2B class IIb	IL1R1
RPE	ribulose-5-phosphate-3-epimerase	IL1R2
CCDC122	coiled-coil domain containing 122	IL1RN
GABRA4	gamma-aminobutyric acid (GABA) A receptor, alpha 4	IL2
GALNT1	UDP-N-acetyl-alpha-D-galactosamine:polypeptide N-acetylgalactosaminyltransferase 1 (GalNAc-T1)	IL20
AL953854.2		IL21
LRRC8B	leucine rich repeat containing 8 family, member B	IL2RA
TXNDC12	thioredoxin domain containing 12 (endoplasmic reticulum)	IL2RB
CISD1	CDGSH iron sulfur domain 1	IL2RG
AC023632.1	HCG2009141; PRO2397; Uncharacterized protein	IL3
C5AR1	complement component 5a receptor 1	IL4
KIAA1456	KIAA1456	IL5
C10orf118	chromosome 10 open reading frame 118	IL5RA
RP11-826N14.2	Uncharacterized protein	IL6
SOX1	SRY (sex determining region Y)-box 1	IL6R
CD200	CD200 molecule	IL7
PREX2	phosphatidylinositol-3,4,5-trisphosphate-dependent Rac exchange factor 2	CXCL8
FOXD4L5	forkhead box D4-like 5	CXCR2
FLRT2	fibronectin leucine rich transmembrane protein 2	IL9R
GRIN2B	glutamate receptor, ionotropic, N-methyl D-aspartate 2B	IL13RA2
CXCL10	chemokine (C-X-C motif) ligand 10	LOC710618
RAB23	RAB23, member RAS oncogene family	IL9
CSTF2	cleavage stimulation factor, 3' pre-RNA, subunit 2, 64kDa	CCL7
CDH7	cadherin 7, type 2	CCL26
DCUN1D5	DCN1, defective in cullin neddylation 1, domain containing 5	LTA
RAB1A	RAB1A, member RAS oncogene family	MIF
PLAGL1	pleiomorphic adenoma gene-like 1	NAMPT
ANKRD49	ankyrin repeat domain 49	OSM
RGS5	regulator of G-protein signaling 5	PF4
BET1	Bet1 golgi vesicular membrane trafficking protein	SPP1
KLHDC1	kelch domain containing 1	TNF
LRRTM4	leucine rich repeat transmembrane neuronal 4	TNFRSF11B
COL4A3	collagen, type IV, alpha 3 (Goodpasture antigen)	TNFSF10
MEX3B	mex-3 RNA binding family member B	TNFSF11
TM4SF18	transmembrane 4 L six family member 18	TNFSF13B
TBX20	T-box 20	TNFSF14
FAM181A	family with sequence similarity 181, member A	TNFSF4
RHOT1	ras homolog family member T1	VEGFA
EGFL6	EGF-like-domain, multiple 6	XCL1
ERO1L	ERO1-like (S. cerevisiae)	NFKBIA
KCNH5	potassium voltage-gated channel, subfamily H (eag-related), member 5	CD36
GPATCH2L	G patch domain containing 2-like	STAT1
CREBZF	CREB/ATF bZIP transcription factor	MAFB
ANKRD12	ankyrin repeat domain 12
CXCL5	chemokine (C-X-C motif) ligand 5
EPPIN	epididymal peptidase inhibitor
EPPIN-WFDC6	EPPIN-WFDC6 readthrough
ARPP19	cAMP-regulated phosphoprotein, 19kDa
C10orf129	chromosome 10 open reading frame 129
PNRC2	proline-rich nuclear receptor coactivator 2
KATNAL2	katanin p60 subunit A-like 2
TRPC1	transient receptor potential cation channel, subfamily C, member 1
TDG	thymine-DNA glycosylase
SUMO3	small ubiquitin-like modifier 3
SEPP1	selenoprotein P, plasma, 1
CXCL6	chemokine (C-X-C motif) ligand 6
RAB39A	RAB39A, member RAS oncogene family
KIAA1586	KIAA1586
CYP4F11	cytochrome P450, family 4, subfamily F, polypeptide 11
STEAP2	STEAP family member 2, metalloreductase
SLC22A9	solute carrier family 22 (organic anion transporter), member 9
CHM	choroideremia (Rab escort protein 1)
KHDRBS1	KH domain containing, RNA binding, signal transduction associated 1
OMA1	OMA1 zinc metallopeptidase
BACH1	BTB and CNC homology 1, basic leucine zipper transcription factor 1
KERA	keratocan
ZNF431	zinc finger protein 431
FAM228B	family with sequence similarity 228, member B
NEUROD6	neuronal differentiation 6
DNER	delta/notch-like EGF repeat containing
MAOA	monoamine oxidase A
OXCT1	3-oxoacid CoA transferase 1
AC135178.1	HCG1985372; Uncharacterized protein; cDNA FLJ37541 fis, clone BRCAN2026340
CCSAP	centriole, cilia and spindle-associated protein
RP11-181C3.1	Uncharacterized protein
BEX1	brain expressed, X-linked 1
RAB6A	RAB6A, member RAS oncogene family
SFXN1	sideroflexin 1
RPL7	ribosomal protein L7
CCNB2	cyclin B2
BHLHE22	basic helix-loop-helix family, member e22
KCNJ15	potassium inwardly-rectifying channel, subfamily J, member 15
CHL1	cell adhesion molecule L1-like
CYB5B	cytochrome b5 type B (outer mitochondrial membrane)
EXOC6	exocyst complex component 6
SAMD9L	sterile alpha motif domain containing 9-like
HDAC2	histone deacetylase 2
N4BP2	NEDD4 binding protein 2
HSDL1	hydroxysteroid dehydrogenase like 1
EMC7	ER membrane protein complex subunit 7
NUS1	nuclear undecaprenyl pyrophosphate synthase 1 homolog (S. cerevisiae)
CA13	carbonic anhydrase XIII
GALNT7	UDP-N-acetyl-alpha-D-galactosamine:polypeptide N-acetylgalactosaminyltransferase 7 (GalNAc-T7)
RFX7	regulatory factor X, 7
PAGE5	P antigen family, member 5 (prostate associated)
BTG1	B-cell translocation gene 1, anti-proliferative
SAMSN1	SAM domain, SH3 domain and nuclear localization signals 1
MFSD8	major facilitator superfamily domain containing 8
NUDT4	nudix (nucleoside diphosphate linked moiety X)-type motif 4
RP11-758M4.1	Uncharacterized protein
DSTN	destrin (actin depolymerizing factor)
AIMP1	aminoacyl tRNA synthetase complex-interacting multifunctional protein 1
MRPL34	mitochondrial ribosomal protein L34
LCA5	Leber congenital amaurosis 5
FOLH1	folate hydrolase (prostate-specific membrane antigen) 1
BIRC3	baculoviral IAP repeat containing 3
ALG10B	ALG10B, alpha-1,2-glucosyltransferase
CA8	carbonic anhydrase VIII
CSTF2T	cleavage stimulation factor, 3' pre-RNA, subunit 2, 64kDa, tau variant
SNX25	sorting nexin 25
PURA	purine-rich element binding protein A
ABCC9	ATP-binding cassette, sub-family C (CFTR/MRP), member 9
ANLN	anillin, actin binding protein
NAB1	NGFI-A binding protein 1 (EGR1 binding protein 1)
DNAJC13	DnaJ (Hsp40) homolog, subfamily C, member 13
TEX36	testis expressed 36
IFT80	intraflagellar transport 80 homolog (Chlamydomonas)
GOLT1B	golgi transport 1B
RTCA	RNA 3'-terminal phosphate cyclase
DAZL	deleted in azoospermia-like
HOMER2	homer homolog 2 (Drosophila)
PXT1	peroxisomal, testis specific 1
DOK6	docking protein 6
USP41	ubiquitin specific peptidase 41
ITGAV	integrin, alpha V
PBLD	phenazine biosynthesis-like protein domain containing
GPR1	G protein-coupled receptor 1
FAP	fibroblast activation protein, alpha
TRIM61	tripartite motif containing 61
TFEC	transcription factor EC
DAZ3	deleted in azoospermia 3
CYP26B1	cytochrome P450, family 26, subfamily B, polypeptide 1
KRTAP4-5	keratin associated protein 4-5
KIAA1279	KIAA1279
TMEM215	transmembrane protein 215
MFF	mitochondrial fission factor
DIAPH2	diaphanous-related formin 2
STON1	stonin 1
TRIM22	tripartite motif containing 22
ZCWPW2	zinc finger, CW type with PWWP domain 2
MAB21L1	mab-21-like 1 (C. elegans)
ZNF165	zinc finger protein 165
HDGFRP3	Hepatoma-derived growth factor-related protein 3
LYSMD1	LysM, putative peptidoglycan-binding, domain containing 1
SPOPL	speckle-type POZ protein-like
EVA1A	eva-1 homolog A (C. elegans)
DYNC2LI1	dynein, cytoplasmic 2, light intermediate chain 1
DNAJB14	DnaJ (Hsp40) homolog, subfamily B, member 14
NAT1	N-acetyltransferase 1 (arylamine N-acetyltransferase)
AC124890.1	HCG1774533, isoform CRA_a; PRO2268; Uncharacterized protein
MTHFD2	methylenetetrahydrofolate dehydrogenase (NADP+ dependent) 2, methenyltetrahydrofolate cyclohydrolase
ZNF804B	zinc finger protein 804B
PAK1IP1	PAK1 interacting protein 1
LIMA1	LIM domain and actin binding 1
CCL20	chemokine (C-C motif) ligand 20
FOXD4L4	forkhead box D4-like 4
C15orf65	chromosome 15 open reading frame 65
TRIM5	tripartite motif containing 5
PRKG1	protein kinase, cGMP-dependent, type I
CBWD2	COBW domain containing 2
ICK	intestinal cell (MAK-like) kinase
TARDBP	TAR DNA binding protein
SSH2	slingshot protein phosphatase 2
PAPD7	PAP associated domain containing 7
ZFX	zinc finger protein, X-linked
TMEM246	transmembrane protein 246
FPR3	formyl peptide receptor 3
RAB27B	RAB27B, member RAS oncogene family
CBWD7	COBW domain containing 7
ERC2	ELKS/RAB6-interacting/CAST family member 2
SLC2A13	solute carrier family 2 (facilitated glucose transporter), member 13
ASPN	asporin
GYPA	glycophorin A (MNS blood group)
KCTD14	potassium channel tetramerization domain containing 14
MIPOL1	mirror-image polydactyly 1
CAPN2	calpain 2, (m/II) large subunit
TEK	TEK tyrosine kinase, endothelial
LPAR1	lysophosphatidic acid receptor 1
ARL15	ADP-ribosylation factor-like 15
AL136115.1	HCG2032337; PRO1848; Uncharacterized protein
CIB4	calcium and integrin binding family member 4
BBS7	Bardet-Biedl syndrome 7
POU5F2	POU domain class 5, transcription factor 2
SV2A	synaptic vesicle glycoprotein 2A
ZFP37	ZFP37 zinc finger protein
ACVR1C	activin A receptor, type IC
SSX2IP	synovial sarcoma, X breakpoint 2 interacting protein
TMEM170B	transmembrane protein 170B
TP53BP2	tumor protein p53 binding protein, 2
BMPR1A	bone morphogenetic protein receptor, type IA
FABP2	fatty acid binding protein 2, intestinal
SCUBE1	signal peptide, CUB domain, EGF-like 1
CNTN4	contactin 4
ZDHHC15	zinc finger, DHHC-type containing 15
MTRNR2L7	MT-RNR2-like 7
SUCLG2	succinate-CoA ligase, GDP-forming, beta subunit
REEP3	receptor accessory protein 3
FBXO45	F-box protein 45
MEP1A	meprin A, alpha (PABA peptide hydrolase)
PCGF3	polycomb group ring finger 3
CXCR4	chemokine (C-X-C motif) receptor 4
HIPK1	homeodomain interacting protein kinase 1
C7orf57	chromosome 7 open reading frame 57
CCNB3	cyclin B3
SLC11A2	solute carrier family 11 (proton-coupled divalent metal ion transporter), member 2
SGIP1	SH3-domain GRB2-like (endophilin) interacting protein 1
IL33	interleukin 33
FOXB1	forkhead box B1
SCHIP1	schwannomin interacting protein 1
SUCNR1	succinate receptor 1
HOXA10	homeobox A10
OAZ1	ornithine decarboxylase antizyme 1
C2orf49	chromosome 2 open reading frame 49
MDH1B	malate dehydrogenase 1B, NAD (soluble)
C7orf61	chromosome 7 open reading frame 61
GPR63	G protein-coupled receptor 63
MTF2	metal response element binding transcription factor 2
SNX4	sorting nexin 4
IFNW1	interferon, omega 1
CBWD5	COBW domain containing 5
CBWD6	COBW domain containing 6
PGR	progesterone receptor
CBWD3	COBW domain containing 3
CBWD1	COBW domain containing 1
RGCC	regulator of cell cycle
NUP62CL	nucleoporin 62kDa C-terminal like
GABRA2	gamma-aminobutyric acid (GABA) A receptor, alpha 2
FAM173B	family with sequence similarity 173, member B
CEP44	centrosomal protein 44kDa
AEBP2	AE binding protein 2
MTX3	metaxin 3
C2orf69	chromosome 2 open reading frame 69
LHFPL3	lipoma HMGIC fusion partner-like 3
MTRNR2L6	MT-RNR2-like 6
RP11-160N1.10
FAM24A	family with sequence similarity 24, member A
TRPC3	transient receptor potential cation channel, subfamily C, member 3
MAP10	microtubule-associated protein 10
PTPN13	protein tyrosine phosphatase, non-receptor type 13 (APO-1/CD95 (Fas)-associated phosphatase)
MAP3K7CL	MAP3K7 C-terminal like
PTGS2	prostaglandin-endoperoxide synthase 2 (prostaglandin G/H synthase and cyclooxygenase)
RCN2	reticulocalbin 2, EF-hand calcium binding domain
BCMO1	beta-carotene 15,15'-monooxygenase 1
MYCT1	myc target 1
C1orf180	chromosome 1 open reading frame 180
NEK1	NIMA-related kinase 1
SCAMP1	secretory carrier membrane protein 1
IL23A	interleukin 23, alpha subunit p19
HMGN5	high mobility group nucleosome binding domain 5
OCIAD1	OCIA domain containing 1
C17orf112	chromosome 17 open reading frame 112
RAB11FIP2	RAB11 family interacting protein 2 (class I)
CCDC71L	coiled-coil domain containing 71-like
HELT	helt bHLH transcription factor
AKIRIN1	akirin 1
ANKRD36	ankyrin repeat domain 36
CLDN12	claudin 12
GPR65	G protein-coupled receptor 65
LLGL1	lethal giant larvae homolog 1 (Drosophila)
HRASLS	HRAS-like suppressor
RP11-169F17.1	Protein LOC400655
PRG4	proteoglycan 4
SEMA3E	sema domain, immunoglobulin domain (Ig), short basic domain, secreted, (semaphorin) 3E
IRF6	interferon regulatory factor 6
ZNF488	zinc finger protein 488
AL354993.1	Cell growth-inhibiting protein 7; HCG1784586; Uncharacterized protein
BIVM	basic, immunoglobulin-like variable motif containing
TNFSF4	tumor necrosis factor (ligand) superfamily, member 4
F3	coagulation factor III (thromboplastin, tissue factor)
FER	fer (fps/fes related) tyrosine kinase
HSD17B12	hydroxysteroid (17-beta) dehydrogenase 12
UBE2A	ubiquitin-conjugating enzyme E2A
LRRCC1	leucine rich repeat and coiled-coil centrosomal protein 1
SIRT5	sirtuin 5
USP13	ubiquitin specific peptidase 13 (isopeptidase T-3)
TRIP11	thyroid hormone receptor interactor 11
RNF128	ring finger protein 128, E3 ubiquitin protein ligase
CRHBP	corticotropin releasing hormone binding protein
ELOVL2	ELOVL fatty acid elongase 2
ICA1L	islet cell autoantigen 1,69kDa-like
MTX2	metaxin 2
ZNF140	zinc finger protein 140
MRPL2	mitochondrial ribosomal protein L2
ZNF655	zinc finger protein 655
TRNP1	TMF1-regulated nuclear protein 1
PLCXD3	phosphatidylinositol-specific phospholipase C, X domain containing 3
HMGN3	high mobility group nucleosomal binding domain 3
TFRC	transferrin receptor
EFCAB6	EF-hand calcium binding domain 6
ZNF292	zinc finger protein 292
MTRNR2L10	MT-RNR2-like 10
PPP4R2	protein phosphatase 4, regulatory subunit 2
CCDC38	coiled-coil domain containing 38
UBE2V2	ubiquitin-conjugating enzyme E2 variant 2
MITD1	MIT, microtubule interacting and transport, domain containing 1
CCNC	cyclin C
CDK6	cyclin-dependent kinase 6
PLAUR	plasminogen activator, urokinase receptor
SNRNP27	small nuclear ribonucleoprotein 27kDa (U4/U6.U5)
KIF3A	kinesin family member 3A
TRH	thyrotropin-releasing hormone
C8orf37	chromosome 8 open reading frame 37
KCTD6	potassium channel tetramerization domain containing 6
ITLN1	intelectin 1 (galactofuranose binding)
GJB2	gap junction protein, beta 2, 26kDa
MMGT1	membrane magnesium transporter 1
HIPK3	homeodomain interacting protein kinase 3
MSI2	musashi RNA-binding protein 2
RFK	riboflavin kinase
BIRC2	baculoviral IAP repeat containing 2
CRISP1	cysteine-rich secretory protein 1
BBS10	Bardet-Biedl syndrome 10
NSF	N-ethylmaleimide-sensitive factor
CISD2	CDGSH iron sulfur domain 2
CXADR	coxsackie virus and adenovirus receptor
ZNF830	zinc finger protein 830
MANEA	mannosidase, endo-alpha
SOCS4	suppressor of cytokine signaling 4
FAM181B	family with sequence similarity 181, member B
KDM1B	lysine (K)-specific demethylase 1B
EDDM3A	epididymal protein 3A
AP1AR	adaptor-related protein complex 1 associated regulatory protein
IQCJ-SCHIP1	IQCJ-SCHIP1 readthrough
POU3F3	POU class 3 homeobox 3
SLC26A7	solute carrier family 26 (anion exchanger), member 7
LUZP6	leucine zipper protein 6
SPRTN	SprT-like N-terminal domain
C20orf197	chromosome 20 open reading frame 197
LRRC4	leucine rich repeat containing 4
B4GALT6	UDP-Gal:betaGlcNAc beta 1,4- galactosyltransferase, polypeptide 6
AC093677.1	Uncharacterized protein
POLR2M	polymerase (RNA) II (DNA directed) polypeptide M
C11orf87	chromosome 11 open reading frame 87
BCKDHB	branched chain keto acid dehydrogenase E1, beta polypeptide
ZNF260	zinc finger protein 260
RGMB	RGM domain family, member B
FAM183B	family with sequence similarity 183, member B
GINS1	GINS complex subunit 1 (Psf1 homolog)
RAB30	RAB30, member RAS oncogene family
KLHL4	kelch-like family member 4
ERGIC2	ERGIC and golgi 2
ENTHD1	ENTH domain containing 1
RAB39B	RAB39B, member RAS oncogene family
AP4E1	adaptor-related protein complex 4, epsilon 1 subunit
MBIP	MAP3K12 binding inhibitory protein 1
RGS13	regulator of G-protein signaling 13
TMEM165	transmembrane protein 165
ZNF800	zinc finger protein 800
EIF2S3	eukaryotic translation initiation factor 2, subunit 3 gamma, 52kDa
ZNF397	zinc finger protein 397
TTC27	tetratricopeptide repeat domain 27
PUS7L	pseudouridylate synthase 7 homolog (S. cerevisiae)-like
PGAP1	post-GPI attachment to proteins 1
ZNF430	zinc finger protein 430
TTC39B	tetratricopeptide repeat domain 39B
TAF1D	TATA box binding protein (TBP)-associated factor, RNA polymerase I, D, 41kDa
INSL5	insulin-like 5
TMLHE	trimethyllysine hydroxylase, epsilon
IRF8	interferon regulatory factor 8
DUSP2	dual specificity phosphatase 2
RP1-170O19.20	Uncharacterized protein
CPEB2	cytoplasmic polyadenylation element binding protein 2
PLA2G4D	phospholipase A2, group IVD (cytosolic)
NAIP	NLR family, apoptosis inhibitory protein
JHDM1D	jumonji C domain containing histone demethylase 1 homolog D (S. cerevisiae)
TMEM33	transmembrane protein 33
CLUL1	clusterin-like 1 (retinal)
EFEMP1	EGF containing fibulin-like extracellular matrix protein 1
TMEM161B	transmembrane protein 161B
SFPQ	splicing factor proline/glutamine-rich
DNAJC19	DnaJ (Hsp40) homolog, subfamily C, member 19
NEGR1	neuronal growth regulator 1
ZNF429	zinc finger protein 429
LMAN1	lectin, mannose-binding, 1
C8orf34	chromosome 8 open reading frame 34
RTP4	receptor (chemosensory) transporter protein 4
TIA1	TIA1 cytotoxic granule-associated RNA binding protein
DCAF8L1	DDB1 and CUL4 associated factor 8-like 1
GLS	glutaminase
RP11-47I22.4
KLF10	Kruppel-like factor 10
TBC1D30	TBC1 domain family, member 30
AC007375.1	Uncharacterized protein; cDNA FLJ43210 fis, clone FEBRA2020582
MLF1	myeloid leukemia factor 1
CD226	CD226 molecule
PAQR3	progestin and adipoQ receptor family member III
ZNF117	zinc finger protein 117
EBAG9	estrogen receptor binding site associated, antigen, 9
TRMT61B	tRNA methyltransferase 61 homolog B (S. cerevisiae)
CCL13	chemokine (C-C motif) ligand 13
NEK7	NIMA-related kinase 7
AMER2	APC membrane recruitment protein 2
SEMA5A	sema domain, seven thrombospondin repeats (type 1 and type 1-like), transmembrane domain (TM) and short cytoplasmic domain, (semaphorin) 5A
IQCH	IQ motif containing H
TMEM30A	transmembrane protein 30A
EPM2AIP1	EPM2A (laforin) interacting protein 1
KBTBD3	kelch repeat and BTB (POZ) domain containing 3
USP45	ubiquitin specific peptidase 45
NHLRC2	NHL repeat containing 2
SMIM10	small integral membrane protein 10
PPP1R14B	protein phosphatase 1, regulatory (inhibitor) subunit 14B
TPO	thyroid peroxidase
TMEM41B	transmembrane protein 41B
SLC35D3	solute carrier family 35, member D3
CNTN1	contactin 1
DCLK1	doublecortin-like kinase 1
PSMD10	proteasome (prosome, macropain) 26S subunit, non-ATPase, 10
RP11-187E13.1	Uncharacterized protein
IL31	interleukin 31
OLFM3	olfactomedin 3
ZDHHC2	zinc finger, DHHC-type containing 2
CRY1	cryptochrome 1 (photolyase-like)
PRKRIR	protein-kinase, interferon-inducible double stranded RNA dependent inhibitor, repressor of (P58 repressor)
POLR1B	polymerase (RNA) I polypeptide B, 128kDa
SLC30A9	solute carrier family 30 (zinc transporter), member 9
TMEM50A	transmembrane protein 50A
SPATA6	spermatogenesis associated 6
RGS4	regulator of G-protein signaling 4
GAS2	growth arrest-specific 2
UPRT	uracil phosphoribosyltransferase (FUR1) homolog (S. cerevisiae)
LRCH1	leucine-rich repeats and calponin homology (CH) domain containing 1
KISS1R	KISS1 receptor
GCG	glucagon
HBG1	hemoglobin, gamma A
RFESD	Rieske (Fe-S) domain containing
TMC5	transmembrane channel-like 5
MTERFD1	MTERF domain containing 1
ST6GAL1	ST6 beta-galactosamide alpha-2,6-sialyltranferase 1
STAG2	stromal antigen 2
HOXA9	homeobox A9
POLR3G	polymerase (RNA) III (DNA directed) polypeptide G (32kD)
C1orf110	chromosome 1 open reading frame 110
PABPC4L	poly(A) binding protein, cytoplasmic 4-like
STARD3NL	STARD3 N-terminal like
CHIC1	cysteine-rich hydrophobic domain 1
SLC38A4	solute carrier family 38, member 4
FNDC1	fibronectin type III domain containing 1
TSHZ2	teashirt zinc finger homeobox 2
SRBD1	S1 RNA binding domain 1
NR5A2	nuclear receptor subfamily 5, group A, member 2
DARS	aspartyl-tRNA synthetase
CAPN7	calpain 7
FGFR1OP	FGFR1 oncogene partner
SP8	Sp8 transcription factor
HIST1H2BH	histone cluster 1, H2bh
C11orf44	chromosome 11 open reading frame 44
TMEM66	transmembrane protein 66
HSPA5	heat shock 70kDa protein 5 (glucose-regulated protein, 78kDa)
CLHC1	clathrin heavy chain linker domain containing 1
ATF3	activating transcription factor 3
ZNF280D	zinc finger protein 280D
SLC5A7	solute carrier family 5 (sodium/choline cotransporter), member 7
DPP10	dipeptidyl-peptidase 10 (non-functional)
OR5T1	olfactory receptor, family 5, subfamily T, member 1
MEIS1	Meis homeobox 1
TDGF1	teratocarcinoma-derived growth factor 1
MLX	MLX, MAX dimerization protein
GTF2A1	general transcription factor IIA, 1, 19/37kDa
BLOC1S2	biogenesis of lysosomal organelles complex-1, subunit 2
TMEM187	transmembrane protein 187
URM1	ubiquitin related modifier 1
NR2E1	nuclear receptor subfamily 2, group E, member 1
HPN	hepsin
C3orf33	chromosome 3 open reading frame 33
HLTF	helicase-like transcription factor
MPC1	mitochondrial pyruvate carrier 1
C10orf67	chromosome 10 open reading frame 67
ARSK	arylsulfatase family, member K
MADCAM1	mucosal vascular addressin cell adhesion molecule 1
SLC35A3	solute carrier family 35 (UDP-N-acetylglucosamine (UDP-GlcNAc) transporter), member A3
MEGF9	multiple EGF-like-domains 9
ATF7IP	activating transcription factor 7 interacting protein
EYA4	eyes absent homolog 4 (Drosophila)
BRI3BP	BRI3 binding protein
LARP1B	La ribonucleoprotein domain family, member 1B
MTMR9	myotubularin related protein 9
FOXD4L2	forkhead box D4-like 2
GPR27	G protein-coupled receptor 27
MAN2B2	mannosidase, alpha, class 2B, member 2
S100A7A	S100 calcium binding protein A7A
GFRAL	GDNF family receptor alpha like
ZNF518B	zinc finger protein 518B
ISOC1	isochorismatase domain containing 1
RBM47	RNA binding motif protein 47
UGP2	UDP-glucose pyrophosphorylase 2
CDK17	cyclin-dependent kinase 17
ZSCAN5A	zinc finger and SCAN domain containing 5A
COL23A1	collagen, type XXIII, alpha 1
LGSN	lengsin, lens protein with glutamine synthetase domain
CMTM6	CKLF-like MARVEL transmembrane domain containing 6
ANKAR	ankyrin and armadillo repeat containing
NPY1R	neuropeptide Y receptor Y1
GCOM1	GRINL1A complex locus 1
PTER	phosphotriesterase related
YY1	YY1 transcription factor
SCLT1	sodium channel and clathrin linker 1
THSD7A	thrombospondin, type I, domain containing 7A
AICDA	activation-induced cytidine deaminase
OXR1	oxidation resistance 1
TNPO1	transportin 1
TSC22D3	TSC22 domain family, member 3
FILIP1	filamin A interacting protein 1
YBX3	Y box binding protein 3
DUS4L	dihydrouridine synthase 4-like (S. cerevisiae)
UBD	ubiquitin D
TRAPPC3L	trafficking protein particle complex 3-like
ZUFSP	zinc finger with UFM1-specific peptidase domain
ZNF616	zinc finger protein 616
KLF11	Kruppel-like factor 11
ZBTB44	zinc finger and BTB domain containing 44
ALOX15	arachidonate 15-lipoxygenase
LRIG1	leucine-rich repeats and immunoglobulin-like domains 1
FAM110C	family with sequence similarity 110, member C
FMO5	flavin containing monooxygenase 5
CNTNAP3B	contactin associated protein-like 3B
EIF5AL1	eukaryotic translation initiation factor 5A-like 1
TAS2R13	taste receptor, type 2, member 13
AC008948.1
FBXO3	F-box protein 3
MYC	v-myc avian myelocytomatosis viral oncogene homolog
TMEM182	transmembrane protein 182
HOXD13	homeobox D13
TMPRSS12	transmembrane (C-terminal) protease, serine 12
UGT2B10	UDP glucuronosyltransferase 2 family, polypeptide B10
ABI3BP	ABI family, member 3 (NESH) binding protein
MRI1	methylthioribose-1-phosphate isomerase 1
CALCB	calcitonin-related polypeptide beta
DACT1	dishevelled-binding antagonist of beta-catenin 1
MSTO1	misato 1, mitochondrial distribution and morphology regulator
UFL1	UFM1-specific ligase 1
ABCB10	ATP-binding cassette, sub-family B (MDR/TAP), member 10
SNTG2	syntrophin, gamma 2
TAF1A	TATA box binding protein (TBP)-associated factor, RNA polymerase I, A, 48kDa
TMEM185B	transmembrane protein 185B
CYB561A3	cytochrome b561 family, member A3
RNPC3	RNA-binding region (RNP1, RRM) containing 3
ZNF599	zinc finger protein 599
ANGPTL7	angiopoietin-like 7
DGKB	diacylglycerol kinase, beta 90kDa
HIVEP1	human immunodeficiency virus type I enhancer binding protein 1
ITPRIPL2	inositol 1,4,5-trisphosphate receptor interacting protein-like 2
PTAR1	protein prenyltransferase alpha subunit repeat containing 1
GDF5	growth differentiation factor 5
RAB38	RAB38, member RAS oncogene family
SSU72	SSU72 RNA polymerase II CTD phosphatase homolog (S. cerevisiae)
ZNF254	zinc finger protein 254
COBLL1	cordon-bleu WH2 repeat protein-like 1
N4BP1	NEDD4 binding protein 1
LIN7C	lin-7 homolog C (C. elegans)
TTBK2	tau tubulin kinase 2
LYRM2	LYR motif containing 2
TTC32	tetratricopeptide repeat domain 32
C1orf21	chromosome 1 open reading frame 21
ZNF704	zinc finger protein 704
RCHY1	ring finger and CHY zinc finger domain containing 1, E3 ubiquitin protein ligase
CTSO	cathepsin O
CCDC90B	coiled-coil domain containing 90B
EDN1	endothelin 1
WISP3	WNT1 inducible signaling pathway protein 3
MAPK1IP1L	mitogen-activated protein kinase 1 interacting protein 1-like
DTWD2	DTW domain containing 2
POLK	polymerase (DNA directed) kappa
IRAK1BP1	interleukin-1 receptor-associated kinase 1 binding protein 1
FAM150A	family with sequence similarity 150, member A
PLSCR4	phospholipid scramblase 4
RAD54B	RAD54 homolog B (S. cerevisiae)
KIAA0825	KIAA0825
PRRG1	proline rich Gla (G-carboxyglutamic acid) 1
CDH8	cadherin 8, type 2
PRND	prion protein 2 (dublet)
TRIM17	tripartite motif containing 17
ZNF770	zinc finger protein 770
NUP43	nucleoporin 43kDa
C9orf47	chromosome 9 open reading frame 47
KCNG3	potassium voltage-gated channel, subfamily G, member 3
MSR1	macrophage scavenger receptor 1
TAF15	TAF15 RNA polymerase II, TATA box binding protein (TBP)-associated factor, 68kDa
RPL3L	ribosomal protein L3-like
FAM217B	family with sequence similarity 217, member B
PDZD8	PDZ domain containing 8
ETV1	ets variant 1
INHBA	inhibin, beta A
AGL	amylo-alpha-1, 6-glucosidase, 4-alpha-glucanotransferase
BHLHB9	basic helix-loop-helix domain containing, class B, 9
GABRA1	gamma-aminobutyric acid (GABA) A receptor, alpha 1
IFNG	interferon, gamma
TTC29	tetratricopeptide repeat domain 29
GPR151	G protein-coupled receptor 151
OSM	oncostatin M
LTBP1	latent transforming growth factor beta binding protein 1
ZNF423	zinc finger protein 423
C4orf45	chromosome 4 open reading frame 45
PLEKHH2	pleckstrin homology domain containing, family H (with MyTH4 domain) member 2
RND3	Rho family GTPase 3
CDS1	CDP-diacylglycerol synthase (phosphatidate cytidylyltransferase) 1
UGT2B4	UDP glucuronosyltransferase 2 family, polypeptide B4
CPB1	carboxypeptidase B1 (tissue)
PARD6G	par-6 family cell polarity regulator gamma
RP11-706O15.1	HCG1981372, isoform CRA_c; Uncharacterized protein
THEMIS	thymocyte selection associated
MCPH1	microcephalin 1
FAM49B	family with sequence similarity 49, member B
FGF2	fibroblast growth factor 2 (basic)
SRSF10	serine/arginine-rich splicing factor 10
CNOT6	CCR4-NOT transcription complex, subunit 6
MUSK	muscle, skeletal, receptor tyrosine kinase
CNTNAP3	contactin associated protein-like 3
MPPED2	metallophosphoesterase domain containing 2
CNEP1R1	CTD nuclear envelope phosphatase 1 regulatory subunit 1
PDLIM5	PDZ and LIM domain 5
MYEF2	myelin expression factor 2
KCNMB1	potassium large conductance calcium-activated channel, subfamily M, beta member 1
NMUR2	neuromedin U receptor 2
FKTN	fukutin
PTPRZ1	protein tyrosine phosphatase, receptor-type, Z polypeptide 1
SIM1	single-minded homolog 1 (Drosophila)
FAT3	FAT atypical cadherin 3
DLG2	discs, large homolog 2 (Drosophila)
INPP5E	inositol polyphosphate-5-phosphatase, 72 kDa
UBE2D1	ubiquitin-conjugating enzyme E2D 1
ACTN1	actinin, alpha 1
FECH	ferrochelatase
ARMCX5	armadillo repeat containing, X-linked 5
TMEM155	transmembrane protein 155
CTHRC1	collagen triple helix repeat containing 1
RGS7BP	regulator of G-protein signaling 7 binding protein
PHKB	phosphorylase kinase, beta
FAM135A	family with sequence similarity 135, member A
ZNF479	zinc finger protein 479
HIF1A	hypoxia inducible factor 1, alpha subunit (basic helix-loop-helix transcription factor)
SERPINB9	serpin peptidase inhibitor, clade B (ovalbumin), member 9
HMGCS2	3-hydroxy-3-methylglutaryl-CoA synthase 2 (mitochondrial)
EFTUD1	elongation factor Tu GTP binding domain containing 1
NANP	N-acetylneuraminic acid phosphatase
KCNN3	potassium intermediate/small conductance calcium-activated channel, subfamily N, member 3
C3orf58	chromosome 3 open reading frame 58
TUBAL3	tubulin, alpha-like 3
DCAF4	DDB1 and CUL4 associated factor 4
HOXA5	homeobox A5
UNC13C	unc-13 homolog C (C. elegans)
ZFP36	ZFP36 ring finger protein
FZD3	frizzled family receptor 3
ACKR3	atypical chemokine receptor 3
CAMK1D	calcium/calmodulin-dependent protein kinase ID
BDP1	B double prime 1, subunit of RNA polymerase III transcription initiation factor IIIB
BDNF	brain-derived neurotrophic factor
GSTCD	glutathione S-transferase, C-terminal domain containing
PPP3R1	protein phosphatase 3, regulatory subunit B, alpha
ANP32E	acidic (leucine-rich) nuclear phosphoprotein 32 family, member E
PTPN14	protein tyrosine phosphatase, non-receptor type 14
MAP3K5	mitogen-activated protein kinase kinase kinase 5
PPP1R3D	protein phosphatase 1, regulatory subunit 3D
PCDH18	protocadherin 18
CSN1S1	casein alpha s1
CLNK	cytokine-dependent hematopoietic cell linker
MAFF	v-maf avian musculoaponeurotic fibrosarcoma oncogene homolog F
CXorf30	chromosome X open reading frame 30
SEMA4C	sema domain, immunoglobulin domain (Ig), transmembrane domain (TM) and short cytoplasmic domain, (semaphorin) 4C
VSIG1	V-set and immunoglobulin domain containing 1
CDCP2	CUB domain containing protein 2
RP11-455G16.1	Uncharacterized protein
TMX3	thioredoxin-related transmembrane protein 3
KLF5	Kruppel-like factor 5 (intestinal)
SMAGP	small cell adhesion glycoprotein
NEDD1	neural precursor cell expressed, developmentally down-regulated 1
NALCN	sodium leak channel, non-selective
SNX18	sorting nexin 18
OPN5	opsin 5
AL162407.1	CDNA FLJ20147 fis, clone COL07954; HCG1781466; Uncharacterized protein
GDI2	GDP dissociation inhibitor 2
C15orf48	chromosome 15 open reading frame 48
ACTR3B	ARP3 actin-related protein 3 homolog B (yeast)
HADHB	hydroxyacyl-CoA dehydrogenase/3-ketoacyl-CoA thiolase/enoyl-CoA hydratase (trifunctional protein), beta subunit
HIST1H2BF	histone cluster 1, H2bf
DOPEY1	dopey family member 1
MAN1A2	mannosidase, alpha, class 1A, member 2
FRMD3	FERM domain containing 3
BRPF1	bromodomain and PHD finger containing, 1
KCNJ3	potassium inwardly-rectifying channel, subfamily J, member 3
SLC39A9	solute carrier family 39, member 9
THAP1	THAP domain containing, apoptosis associated protein 1
CCDC14	coiled-coil domain containing 14
NADK2	NAD kinase 2, mitochondrial
GABPA	GA binding protein transcription factor, alpha subunit 60kDa
C2orf80	chromosome 2 open reading frame 80
FABP7	fatty acid binding protein 7, brain
GAPVD1	GTPase activating protein and VPS9 domains 1
PCBD2	pterin-4 alpha-carbinolamine dehydratase/dimerization cofactor of hepatocyte nuclear factor 1 alpha (TCF1) 2
STRN	striatin, calmodulin binding protein
ZCCHC24	zinc finger, CCHC domain containing 24
ZBTB8B	zinc finger and BTB domain containing 8B
MORC1	MORC family CW-type zinc finger 1
FAM171B	family with sequence similarity 171, member B
CD40	CD40 molecule, TNF receptor superfamily member 5
ATP2C1	ATPase, Ca++ transporting, type 2C, member 1
LIPA	lipase A, lysosomal acid, cholesterol esterase
FANCF	Fanconi anemia, complementation group F
MOB1A	MOB kinase activator 1A
BAG2	BCL2-associated athanogene 2
KCNMB2	potassium large conductance calcium-activated channel, subfamily M, beta member 2
ANXA7	annexin A7
PDGFC	platelet derived growth factor C
ORMDL1	ORM1-like 1 (S. cerevisiae)
KLHL5	kelch-like family member 5
MCMBP	minichromosome maintenance complex binding protein
TFPI	tissue factor pathway inhibitor (lipoprotein-associated coagulation inhibitor)
ZFP30	ZFP30 zinc finger protein
NFIL3	nuclear factor, interleukin 3 regulated
SDIM1	stress responsive DNAJB4 interacting membrane protein 1
SPCS2	signal peptidase complex subunit 2 homolog (S. cerevisiae)
ZNF624	zinc finger protein 624
SSR3	signal sequence receptor, gamma (translocon-associated protein gamma)
GPATCH4	G patch domain containing 4
GNAI1	guanine nucleotide binding protein (G protein), alpha inhibiting activity polypeptide 1
GTPBP8	GTP-binding protein 8 (putative)
HECA	headcase homolog (Drosophila)
PFN2	profilin 2
C2orf88	chromosome 2 open reading frame 88
LRRC66	leucine rich repeat containing 66
IYD	iodotyrosine deiodinase
RAI2	retinoic acid induced 2
CD33	CD33 molecule
SERF1A	small EDRK-rich factor 1A (telomeric)
SERF1B	small EDRK-rich factor 1B (centromeric)
PCLO	piccolo presynaptic cytomatrix protein
TCP11L1	t-complex 11, testis-specific-like 1
KRTAP6-1	keratin associated protein 6-1
PGRMC2	progesterone receptor membrane component 2
LRRD1	leucine-rich repeats and death domain containing 1
RIT1	Ras-like without CAAX 1
CD109	CD109 molecule
ZNF207	zinc finger protein 207
CTGF	connective tissue growth factor
ASB11	ankyrin repeat and SOCS box containing 11
AC008132.1	Uncharacterized protein
NAPEPLD	N-acyl phosphatidylethanolamine phospholipase D
LRRC2	leucine rich repeat containing 2
BCDIN3D	BCDIN3 domain containing
TSPAN8	tetraspanin 8
FAM126B	family with sequence similarity 126, member B
SP9	Sp9 transcription factor
ADAM17	ADAM metallopeptidase domain 17
GNG2	guanine nucleotide binding protein (G protein), gamma 2
CD164	CD164 molecule, sialomucin
SLC9A4	solute carrier family 9, subfamily A (NHE4, cation proton antiporter 4), member 4
GCNT2	glucosaminyl (N-acetyl) transferase 2, I-branching enzyme (I blood group)
DUSP18	dual specificity phosphatase 18
NUDCD2	NudC domain containing 2
SLC9B2	solute carrier family 9, subfamily B (NHA2, cation proton antiporter 2), member 2
GNAS	GNAS complex locus
GJB6	gap junction protein, beta 6, 30kDa
TDRP	testis development related protein
NCAPG2	non-SMC condensin II complex, subunit G2
INO80D	INO80 complex subunit D
TM9SF3	transmembrane 9 superfamily member 3
YES1	v-yes-1 Yamaguchi sarcoma viral oncogene homolog 1
INPP1	inositol polyphosphate-1-phosphatase
OR11A1	olfactory receptor, family 11, subfamily A, member 1
ALDH1A2	aldehyde dehydrogenase 1 family, member A2
PHLPP1	PH domain and leucine rich repeat protein phosphatase 1
ELSPBP1	epididymal sperm binding protein 1
ZNF43	zinc finger protein 43
CBR4	carbonyl reductase 4
MAP3K2	mitogen-activated protein kinase kinase kinase 2
PALM2	paralemmin 2
LTF	lactotransferrin
HORMAD2	HORMA domain containing 2
L2HGDH	L-2-hydroxyglutarate dehydrogenase
GJD2	gap junction protein, delta 2, 36kDa
MLTK	Mitogen-activated protein kinase kinase kinase MLT
WDR41	WD repeat domain 41
ALS2CR11	amyotrophic lateral sclerosis 2 (juvenile) chromosome region, candidate 11
RPIA	ribose 5-phosphate isomerase A
DPYD	dihydropyrimidine dehydrogenase
SPRY1	sprouty homolog 1, antagonist of FGF signaling (Drosophila)
DBR1	debranching RNA lariats 1
NR4A1	nuclear receptor subfamily 4, group A, member 1
P2RY1	purinergic receptor P2Y, G-protein coupled, 1
CBX4	chromobox homolog 4
ZNF284	zinc finger protein 284
CRISPLD1	cysteine-rich secretory protein LCCL domain containing 1
LMBRD2	LMBR1 domain containing 2
IAPP	islet amyloid polypeptide
ZNF146	zinc finger protein 146
INPP5A	inositol polyphosphate-5-phosphatase, 40kDa
DGKE	diacylglycerol kinase, epsilon 64kDa
DSN1	DSN1, MIS12 kinetochore complex component
MRPL42	mitochondrial ribosomal protein L42
PDE10A	phosphodiesterase 10A
PCNX	pecanex homolog (Drosophila)
RASSF8	Ras association (RalGDS/AF-6) domain family (N-terminal) member 8
TARBP2	TAR (HIV-1) RNA binding protein 2
TMEM167B	transmembrane protein 167B
PRCP	prolylcarboxypeptidase (angiotensinase C)
SLFN5	schlafen family member 5
HIGD1A	HIG1 hypoxia inducible domain family, member 1A
FSBP	fibrinogen silencer binding protein
RAB33B	RAB33B, member RAS oncogene family
PRLR	prolactin receptor
ZNF534	zinc finger protein 534
TMPRSS11A	transmembrane protease, serine 11A
AKAP11	A kinase (PRKA) anchor protein 11
HES2	hairy and enhancer of split 2 (Drosophila)
AHCTF1	AT hook containing transcription factor 1
REL	v-rel avian reticuloendotheliosis viral oncogene homolog
CYBB	cytochrome b-245, beta polypeptide
TSHZ1	teashirt zinc finger homeobox 1
CORO1C	coronin, actin binding protein, 1C
SCAPER	S-phase cyclin A-associated protein in the ER
SLC4A7	solute carrier family 4, sodium bicarbonate cotransporter, member 7
CNOT7	CCR4-NOT transcription complex, subunit 7
PABPC5	poly(A) binding protein, cytoplasmic 5
COX18	COX18 cytochrome C oxidase assembly factor
IFIT2	interferon-induced protein with tetratricopeptide repeats 2
SETD2	SET domain containing 2
ZCCHC11	zinc finger, CCHC domain containing 11
CCDC50	coiled-coil domain containing 50
IL24	interleukin 24
PTGER4	prostaglandin E receptor 4 (subtype EP4)
UBA5	ubiquitin-like modifier activating enzyme 5
RAB22A	RAB22A, member RAS oncogene family
C4orf32	chromosome 4 open reading frame 32
PXK	PX domain containing serine/threonine kinase
AVPR1A	arginine vasopressin receptor 1A
CX3CR1	chemokine (C-X3-C motif) receptor 1
CDH11	cadherin 11, type 2, OB-cadherin (osteoblast)
FAM215A	family with sequence similarity 215, member A (non-protein coding)
CMPK2	cytidine monophosphate (UMP-CMP) kinase 2, mitochondrial
SARNP	SAP domain containing ribonucleoprotein
HPRT1	hypoxanthine phosphoribosyltransferase 1
ZNF420	zinc finger protein 420
ABCA10	ATP-binding cassette, sub-family A (ABC1), member 10
SACM1L	SAC1 suppressor of actin mutations 1-like (yeast)
ASH2L	ash2 (absent, small, or homeotic)-like (Drosophila)
PSPH	phosphoserine phosphatase
FBLIM1	filamin binding LIM protein 1
C5orf27	chromosome 5 open reading frame 27
MTHFD2L	methylenetetrahydrofolate dehydrogenase (NADP+ dependent) 2-like
NRAS	neuroblastoma RAS viral (v-ras) oncogene homolog
C2orf76	chromosome 2 open reading frame 76
TXNDC16	thioredoxin domain containing 16
PTPN2	protein tyrosine phosphatase, non-receptor type 2
SEC24A	SEC24 family, member A (S. cerevisiae)
RNF141	ring finger protein 141
AMIGO2	adhesion molecule with Ig-like domain 2
ACAP2	ArfGAP with coiled-coil, ankyrin repeat and PH domains 2
JUNB	jun B proto-oncogene
PKD2	polycystic kidney disease 2 (autosomal dominant)
RNF111	ring finger protein 111
MIA2	melanoma inhibitory activity 2
CD177	CD177 molecule
ZNF41	zinc finger protein 41
ATP13A3	ATPase type 13A3
PDK1	pyruvate dehydrogenase kinase, isozyme 1
SERP1	stress-associated endoplasmic reticulum protein 1
ACTR3	ARP3 actin-related protein 3 homolog (yeast)
RP11-366L20.2	Uncharacterized protein
PCDH7	protocadherin 7
CMKLR1	chemokine-like receptor 1
MRPL48	mitochondrial ribosomal protein L48
SLC38A2	solute carrier family 38, member 2
NIPA2	non imprinted in Prader-Willi/Angelman syndrome 2
NRIP1	nuclear receptor interacting protein 1
GEN1	GEN1 Holliday junction 5' flap endonuclease
MBD5	methyl-CpG binding domain protein 5
SNRPE	small nuclear ribonucleoprotein polypeptide E
QTRTD1	queuine tRNA-ribosyltransferase domain containing 1
EMB	embigin
PDIK1L	PDLIM1 interacting kinase 1 like
SLC12A1	solute carrier family 12 (sodium/potassium/chloride transporter), member 1
GPR15	G protein-coupled receptor 15
ZNF141	zinc finger protein 141
ETF1	eukaryotic translation termination factor 1
UBE2N	ubiquitin-conjugating enzyme E2N
STAM	signal transducing adaptor molecule (SH3 domain and ITAM motif) 1
RPS6KA6	ribosomal protein S6 kinase, 90kDa, polypeptide 6
DONSON	downstream neighbor of SON
PARM1	prostate androgen-regulated mucin-like protein 1
CCBE1	collagen and calcium binding EGF domains 1
CD58	CD58 molecule
AGR2	anterior gradient 2
RSPH3	radial spoke 3 homolog (Chlamydomonas)
MAGOHB	mago-nashi homolog B (Drosophila)
TGDS	TDP-glucose 4,6-dehydratase
OLFML2B	olfactomedin-like 2B
CCDC102B	coiled-coil domain containing 102B
CUL4A	cullin 4A
ANKRD10	ankyrin repeat domain 10
AMACR	alpha-methylacyl-CoA racemase
TRAM1	translocation associated membrane protein 1
PHLDB2	pleckstrin homology-like domain, family B, member 2
ZBTB24	zinc finger and BTB domain containing 24
PKHD1	polycystic kidney and hepatic disease 1 (autosomal recessive)
CYYR1	cysteine/tyrosine-rich 1
MS4A14	membrane-spanning 4-domains, subfamily A, member 14
YPEL2	yippee-like 2 (Drosophila)
ZNF736	zinc finger protein 736
MBTD1	mbt domain containing 1
C13orf35	chromosome 13 open reading frame 35
BNIP3	BCL2/adenovirus E1B 19kDa interacting protein 3
ANGPT1	angiopoietin 1
RABGEF1	RAB guanine nucleotide exchange factor (GEF) 1
ZNF597	zinc finger protein 597
PKHD1L1	polycystic kidney and hepatic disease 1 (autosomal recessive)-like 1
ESRRG	estrogen-related receptor gamma
PLXDC2	plexin domain containing 2
FMO2	flavin containing monooxygenase 2 (non-functional)
ZNF780B	zinc finger protein 780B
EIF3F	eukaryotic translation initiation factor 3, subunit F
KCTD15	potassium channel tetramerization domain containing 15
CERS3	ceramide synthase 3
COL10A1	collagen, type X, alpha 1
ATE1	arginyltransferase 1
COIL	coilin
PCDHB3	protocadherin beta 3
CCDC141	coiled-coil domain containing 141
SLC6A11	solute carrier family 6 (neurotransmitter transporter), member 11
BMP4	bone morphogenetic protein 4
EPB41L4A-AS2	EPB41L4A antisense RNA 2 (head to head)
BCL2L11	BCL2-like 11 (apoptosis facilitator)
RPP14	ribonuclease P/MRP 14kDa subunit
EIF1AX	eukaryotic translation initiation factor 1A, X-linked
RP11-156E8.1
STX7	syntaxin 7
PRRX1	paired related homeobox 1
DCUN1D1	DCN1, defective in cullin neddylation 1, domain containing 1
METTL15	methyltransferase like 15
NR1D2	nuclear receptor subfamily 1, group D, member 2
NSMCE2	non-SMC element 2, MMS21 homolog (S. cerevisiae)
CHN1	chimerin 1
CREB1	cAMP responsive element binding protein 1
ZNF721	zinc finger protein 721
SERPINB5	serpin peptidase inhibitor, clade B (ovalbumin), member 5
FAM206A	family with sequence similarity 206, member A
ALDH1A3	aldehyde dehydrogenase 1 family, member A3
CDO1	cysteine dioxygenase type 1
RABGAP1L	RAB GTPase activating protein 1-like
GRIA2	glutamate receptor, ionotropic, AMPA 2
ZNF85	zinc finger protein 85
TFAP2A	transcription factor AP-2 alpha (activating enhancer binding protein 2 alpha)
SLC25A46	solute carrier family 25, member 46
PCGF5	polycomb group ring finger 5
SLITRK6	SLIT and NTRK-like family, member 6
METTL6	methyltransferase like 6
SLC13A1	solute carrier family 13 (sodium/sulfate symporter), member 1
PAFAH1B1	platelet-activating factor acetylhydrolase 1b, regulatory subunit 1 (45kDa)
PABPC1	poly(A) binding protein, cytoplasmic 1
FRS2	fibroblast growth factor receptor substrate 2
TMX4	thioredoxin-related transmembrane protein 4
GAN	gigaxonin
ELTD1	EGF, latrophilin and seven transmembrane domain containing 1
C12orf66	chromosome 12 open reading frame 66
ZNF529	zinc finger protein 529
GSTK1	glutathione S-transferase kappa 1
AP3B1	adaptor-related protein complex 3, beta 1 subunit
LIN7A	lin-7 homolog A (C. elegans)
SLCO5A1	solute carrier organic anion transporter family, member 5A1
GAD1	glutamate decarboxylase 1 (brain, 67kDa)
THBS2	thrombospondin 2
DLX1	distal-less homeobox 1
PCBP3	poly(rC) binding protein 3
RNF219	ring finger protein 219
RP6-24A23.6	Uncharacterized protein
PEX2	peroxisomal biogenesis factor 2
COX20	COX20 cytochrome C oxidase assembly factor
POU2F1	POU class 2 homeobox 1
THRB	thyroid hormone receptor, beta
WNT16	wingless-type MMTV integration site family, member 16
P2RY14	purinergic receptor P2Y, G-protein coupled, 14
HDAC8	histone deacetylase 8
TBK1	TANK-binding kinase 1
ATG3	autophagy related 3
ACER3	alkaline ceramidase 3
AHSA2	AHA1, activator of heat shock 90kDa protein ATPase homolog 2 (yeast)
CAMK4	calcium/calmodulin-dependent protein kinase IV
ARHGAP12	Rho GTPase activating protein 12
LRBA	LPS-responsive vesicle trafficking, beach and anchor containing
MTSS1	metastasis suppressor 1
ONECUT2	one cut homeobox 2
RP11-664D7.4	HCG1787533; Uncharacterized protein
ARMCX3	armadillo repeat containing, X-linked 3
MUM1L1	melanoma associated antigen (mutated) 1-like 1
SPOP	speckle-type POZ protein
SLC2A12	solute carrier family 2 (facilitated glucose transporter), member 12
FBXL4	F-box and leucine-rich repeat protein 4
KRAS	Kirsten rat sarcoma viral oncogene homolog
TRIM59	tripartite motif containing 59
PEAK1	pseudopodium-enriched atypical kinase 1
AAK1	AP2 associated kinase 1
KAT2B	K(lysine) acetyltransferase 2B
PCDH11Y	protocadherin 11 Y-linked
MOAP1	modulator of apoptosis 1
PDS5A	PDS5, regulator of cohesion maintenance, homolog A (S. cerevisiae)
RIPK1	receptor (TNFRSF)-interacting serine-threonine kinase 1
PRKAA2	protein kinase, AMP-activated, alpha 2 catalytic subunit
ZNF512	zinc finger protein 512
SLC10A2	solute carrier family 10 (sodium/bile acid cotransporter), member 2
MTDH	metadherin
TPH1	tryptophan hydroxylase 1
BCL11B	B-cell CLL/lymphoma 11B (zinc finger protein)
PCDH19	protocadherin 19
CTNNA3	catenin (cadherin-associated protein), alpha 3
KCNB1	potassium voltage-gated channel, Shab-related subfamily, member 1
ZNF280C	zinc finger protein 280C
HS6ST2	heparan sulfate 6-O-sulfotransferase 2
GSE1	Gse1 coiled-coil protein
DUSP28	dual specificity phosphatase 28
PSTK	phosphoseryl-tRNA kinase
GMNC	geminin coiled-coil domain containing
PTGFR	prostaglandin F receptor (FP)
LOXL2	lysyl oxidase-like 2
TMEM154	transmembrane protein 154
GATC	glutamyl-tRNA(Gln) amidotransferase, subunit C
RPS6KA5	ribosomal protein S6 kinase, 90kDa, polypeptide 5
SAV1	salvador homolog 1 (Drosophila)
CREG2	cellular repressor of E1A-stimulated genes 2
QRSL1	glutaminyl-tRNA synthase (glutamine-hydrolyzing)-like 1
CALD1	caldesmon 1
PI4K2A	Phosphatidylinositol 4-kinase type 2-alpha; Uncharacterized protein
NPL	N-acetylneuraminate pyruvate lyase (dihydrodipicolinate synthase)
ALKBH4	alkB, alkylation repair homolog 4 (E. coli)
SLC16A14	solute carrier family 16, member 14
ZNF236	zinc finger protein 236
ZNF91	zinc finger protein 91
SERPINB10	serpin peptidase inhibitor, clade B (ovalbumin), member 10
MDFIC	MyoD family inhibitor domain containing
CTBS	chitobiase, di-N-acetyl-
TSHZ3	teashirt zinc finger homeobox 3
MT-ATP6	mitochondrially encoded ATP synthase 6
MGAT5	mannosyl (alpha-1,6-)-glycoprotein beta-1,6-N-acetyl-glucosaminyltransferase
TANC2	tetratricopeptide repeat, ankyrin repeat and coiled-coil containing 2
C9orf41	chromosome 9 open reading frame 41
HIST2H2BE	histone cluster 2, H2be
NUFIP1	nuclear fragile X mental retardation protein interacting protein 1
SPTSSA	serine palmitoyltransferase, small subunit A
TEX2	testis expressed 2
DIEXF	digestive organ expansion factor homolog (zebrafish)
AFF2	AF4/FMR2 family, member 2
ZNF253	zinc finger protein 253
NKAIN3	Na+/K+ transporting ATPase interacting 3
C3orf17	chromosome 3 open reading frame 17
ZDHHC21	zinc finger, DHHC-type containing 21
ZNF791	zinc finger protein 791
SETD7	SET domain containing (lysine methyltransferase) 7
NKRF	NFKB repressing factor
GRSF1	G-rich RNA sequence binding factor 1
HERC4	HECT and RLD domain containing E3 ubiquitin protein ligase 4
MPV17L2	MPV17 mitochondrial membrane protein-like 2
PBRM1	polybromo 1
SASS6	spindle assembly 6 homolog (C. elegans)
LIN52	lin-52 homolog (C. elegans)
PHF15	PHD finger protein 15
LARP4	La ribonucleoprotein domain family, member 4
UBA2	ubiquitin-like modifier activating enzyme 2
DTHD1	death domain containing 1
PHC2	polyhomeotic homolog 2 (Drosophila)
SLC16A7	solute carrier family 16 (monocarboxylate transporter), member 7
PHF20	PHD finger protein 20
PDK3	pyruvate dehydrogenase kinase, isozyme 3
LHFP	lipoma HMGIC fusion partner
TMEM35	transmembrane protein 35
RUFY2	RUN and FYVE domain containing 2
EDNRA	endothelin receptor type A
KLRC4	killer cell lectin-like receptor subfamily C, member 4
PA2G4	proliferation-associated 2G4, 38kDa
STON2	stonin 2
SMAP2	small ArfGAP2
NEDD9	neural precursor cell expressed, developmentally down-regulated 9
SFRP2	secreted frizzled-related protein 2
MCM4	minichromosome maintenance complex component 4
FREM2	FRAS1 related extracellular matrix protein 2
CD2AP	CD2-associated protein
USP44	ubiquitin specific peptidase 44
PHYHIPL	phytanoyl-CoA 2-hydroxylase interacting protein-like
CCR4	chemokine (C-C motif) receptor 4
DSG1	desmoglein 1
IMPG2	interphotoreceptor matrix proteoglycan 2
LEPROT	leptin receptor overlapping transcript
BNIP2	BCL2/adenovirus E1B 19kDa interacting protein 2
DNAJC10	DnaJ (Hsp40) homolog, subfamily C, member 10
PPP1R12A	protein phosphatase 1, regulatory subunit 12A
IRAK4	interleukin-1 receptor-associated kinase 4
PAIP2	poly(A) binding protein interacting protein 2
DGKI	diacylglycerol kinase, iota
NCBP2	nuclear cap binding protein subunit 2, 20kDa
FAM124A	family with sequence similarity 124A
PAK7	p21 protein (Cdc42/Rac)-activated kinase 7
LY6K	lymphocyte antigen 6 complex, locus K
IPCEF1	interaction protein for cytohesin exchange factors 1
WIPF2	WAS/WASL interacting protein family, member 2
PRDX3	peroxiredoxin 3
WDR89	WD repeat domain 89
ZNF546	zinc finger protein 546
USP8	ubiquitin specific peptidase 8
COL6A3	collagen, type VI, alpha 3
HS2ST1	heparan sulfate 2-O-sulfotransferase 1
SGMS2	sphingomyelin synthase 2
ROCK2	Rho-associated, coiled-coil containing protein kinase 2
INPP4B	inositol polyphosphate-4-phosphatase, type II, 105kDa
NOVA1	neuro-oncological ventral antigen 1
SPATA8	spermatogenesis associated 8
H3F3B	H3 histone, family 3B (H3.3B)
SPTY2D1	SPT2, Suppressor of Ty, domain containing 1 (S. cerevisiae)
CLCN4	chloride channel, voltage-sensitive 4
CDYL	chromodomain protein, Y-like
IGF2BP1	insulin-like growth factor 2 mRNA binding protein 1
NEXN	nexilin (F actin binding protein)
GXYLT1	glucoside xylosyltransferase 1
CMPK1	cytidine monophosphate (UMP-CMP) kinase 1, cytosolic
ZIC2	Zic family member 2
ESCO1	establishment of sister chromatid cohesion N-acetyltransferase 1
NECAB1	N-terminal EF-hand calcium binding protein 1
MSH3	mutS homolog 3
GNAQ	guanine nucleotide binding protein (G protein), q polypeptide
GJA1	gap junction protein, alpha 1, 43kDa
NFATC2IP	nuclear factor of activated T-cells, cytoplasmic, calcineurin-dependent 2 interacting protein
ANTXR1	anthrax toxin receptor 1
RP1	retinitis pigmentosa 1 (autosomal dominant)
EIF2AK2	eukaryotic translation initiation factor 2-alpha kinase 2
PDHX	pyruvate dehydrogenase complex, component X
SYVN1	synovial apoptosis inhibitor 1, synoviolin
TSNAX	translin-associated factor X
ZNF596	zinc finger protein 596
IL13RA1	interleukin 13 receptor, alpha 1
CPEB4	cytoplasmic polyadenylation element binding protein 4
FGF13	fibroblast growth factor 13
FOXL1	forkhead box L1
RLIM	ring finger protein, LIM domain interacting
SV2B	synaptic vesicle glycoprotein 2B
CYP8B1	cytochrome P450, family 8, subfamily B, polypeptide 1
PPP1R12B	protein phosphatase 1, regulatory subunit 12B
ARID5B	AT rich interactive domain 5B (MRF1-like)
GABRA3	gamma-aminobutyric acid (GABA) A receptor, alpha 3
EPN3	epsin 3
DST	dystonin
RASA4	RAS p21 protein activator 4
NOTCH2NL	notch 2 N-terminal like
IDH1	isocitrate dehydrogenase 1 (NADP+), soluble
CDC42BPB	CDC42 binding protein kinase beta (DMPK-like)
IFI44L	interferon-induced protein 44-like
KCNQ3	potassium voltage-gated channel, KQT-like subfamily, member 3
SLC1A1	solute carrier family 1 (neuronal/epithelial high affinity glutamate transporter, system Xag), member 1
ATP2B4	ATPase, Ca++ transporting, plasma membrane 4
MICALCL	MICAL C-terminal like
TEAD1	TEA domain family member 1 (SV40 transcriptional enhancer factor)
YIPF5	Yip1 domain family, member 5
AKTIP	AKT interacting protein
HNMT	histamine N-methyltransferase
CNTN5	contactin 5
DDIT4L	DNA-damage-inducible transcript 4-like
PPCS	phosphopantothenoylcysteine synthetase
GPR61	G protein-coupled receptor 61
ACPL2	acid phosphatase-like 2
C22orf23	chromosome 22 open reading frame 23
ANKRD44	ankyrin repeat domain 44
SOX11	SRY (sex determining region Y)-box 11
RTN4IP1	reticulon 4 interacting protein 1
TFAM	transcription factor A, mitochondrial
ZSWIM6	zinc finger, SWIM-type containing 6
RALGPS2	Ral GEF with PH domain and SH3 binding motif 2
MAFB	v-maf avian musculoaponeurotic fibrosarcoma oncogene homolog B
PNMA1	paraneoplastic Ma antigen 1
ACOX1	acyl-CoA oxidase 1, palmitoyl
DENND4A	DENN/MADD domain containing 4A
PROX1	prospero homeobox 1
C11orf54	chromosome 11 open reading frame 54
KLF8	Kruppel-like factor 8
ZNF585A	zinc finger protein 585A
DLL1	delta-like 1 (Drosophila)
ZNF286B	zinc finger protein 286B
AL021546.6	Glutamyl-tRNA(Gln) amidotransferase subunit C, mitochondrial
PDGFB	platelet-derived growth factor beta polypeptide
IKZF2	IKAROS family zinc finger 2 (Helios)
FAM126A	family with sequence similarity 126, member A
PIKFYVE	phosphoinositide kinase, FYVE finger containing
HP1BP3	heterochromatin protein 1, binding protein 3
TFDP1	transcription factor Dp-1
HMBOX1	homeobox containing 1
TRA2B	transformer 2 beta homolog (Drosophila)
PAX6	paired box 6
LONRF2	LON peptidase N-terminal domain and ring finger 2
FAM120C	family with sequence similarity 120C
PM20D2	peptidase M20 domain containing 2
PIK3C3	phosphatidylinositol 3-kinase, catalytic subunit type 3
CPNE3	copine III
PPP1R3C	protein phosphatase 1, regulatory subunit 3C
FBLN7	fibulin 7
PRKAA1	protein kinase, AMP-activated, alpha 1 catalytic subunit
CADM1	cell adhesion molecule 1
FBXO11	F-box protein 11
SLMAP	sarcolemma associated protein
PRSS35	protease, serine, 35
ZKSCAN4	zinc finger with KRAB and SCAN domains 4
ELAVL2	ELAV like neuron-specific RNA binding protein 2
COL24A1	collagen, type XXIV, alpha 1
PTPN22	protein tyrosine phosphatase, non-receptor type 22 (lymphoid)
SPATS2	spermatogenesis associated, serine-rich 2
TMEM184C	transmembrane protein 184C
CNIH1	cornichon family AMPA receptor auxiliary protein 1
UBL7	ubiquitin-like 7 (bone marrow stromal cell-derived)
CHMP2B	charged multivesicular body protein 2B
ZNF793	zinc finger protein 793
CSNK1G3	casein kinase 1, gamma 3
PRDM8	PR domain containing 8
MAP3K1	mitogen-activated protein kinase kinase kinase 1, E3 ubiquitin protein ligase
NHLH1	nescient helix loop helix 1
NRSN1	neurensin 1
CACYBP	calcyclin binding protein
TMX2	thioredoxin-related transmembrane protein 2
TPPP	tubulin polymerization promoting protein
ING5	inhibitor of growth family, member 5
MED6	mediator complex subunit 6
GPR75	G protein-coupled receptor 75
WDR7	WD repeat domain 7
SGCD	sarcoglycan, delta (35kDa dystrophin-associated glycoprotein)
DCAF12L2	DDB1 and CUL4 associated factor 12-like 2
SEMA3C	sema domain, immunoglobulin domain (Ig), short basic domain, secreted, (semaphorin) 3C
ZBTB41	zinc finger and BTB domain containing 41
ZNF528	zinc finger protein 528
HIAT1	hippocampus abundant transcript 1
TOP2A	topoisomerase (DNA) II alpha 170kDa
PHIP	pleckstrin homology domain interacting protein
USP6	ubiquitin specific peptidase 6 (Tre-2 oncogene)
THSD4	thrombospondin, type I, domain containing 4
NR4A2	nuclear receptor subfamily 4, group A, member 2
FAXC	failed axon connections homolog (Drosophila)
EPB41L5	erythrocyte membrane protein band 4.1 like 5
SAP30L	SAP30-like
PPP6R3	protein phosphatase 6, regulatory subunit 3
CMTR2	cap methyltransferase 2
OTUD1	OTU domain containing 1
OSTM1	osteopetrosis associated transmembrane protein 1
FLVCR1	feline leukemia virus subgroup C cellular receptor 1
MME	membrane metallo-endopeptidase
ARHGEF33	Rho guanine nucleotide exchange factor (GEF) 33
2019-03-01	membrane-associated ring finger (C3HC4) 1, E3 ubiquitin protein ligase
RBFOX1	RNA binding protein, fox-1 homolog (C. elegans) 1
FRZB	frizzled-related protein
CEP350	centrosomal protein 350kDa
FAM188A	family with sequence similarity 188, member A
PID1	phosphotyrosine interaction domain containing 1
CLIC5	chloride intracellular channel 5
ZC3H14	zinc finger CCCH-type containing 14
KIAA1958	KIAA1958
TSPAN12	tetraspanin 12
DNAJC3	DnaJ (Hsp40) homolog, subfamily C, member 3
ARNTL2	aryl hydrocarbon receptor nuclear translocator-like 2
IQSEC3	IQ motif and Sec7 domain 3
ZC3H12B	zinc finger CCCH-type containing 12B
PCDHA5	protocadherin alpha 5
MAGEA10	melanoma antigen family A, 10
GAB1	GRB2-associated binding protein 1
ZNF180	zinc finger protein 180
CYP1B1	cytochrome P450, family 1, subfamily B, polypeptide 1
GXYLT2	glucoside xylosyltransferase 2
GNAI3	guanine nucleotide binding protein (G protein), alpha inhibiting activity polypeptide 3
EXPH5	exophilin 5
INSIG2	insulin induced gene 2
PRKAR1A	protein kinase, cAMP-dependent, regulatory, type I, alpha
FUBP1	far upstream element (FUSE) binding protein 1
POC1B	POC1 centriolar protein B
AMOTL1	angiomotin like 1
ENTPD1	ectonucleoside triphosphate diphosphohydrolase 1
CD44	CD44 molecule (Indian blood group)
FAM167A	family with sequence similarity 167, member A
RUNX2	runt-related transcription factor 2
TP63	tumor protein p63
PPM1L	protein phosphatase, Mg2+/Mn2+ dependent, 1L
NEBL	nebulette
MTPN	myotrophin
BARD1	BRCA1 associated RING domain 1
RSBN1	round spermatid basic protein 1
INSR	insulin receptor
TMEM117	transmembrane protein 117
AHCY	adenosylhomocysteinase
TSN	translin
SEPSECS	Sep (O-phosphoserine) tRNA:Sec (selenocysteine) tRNA synthase
UBP1	upstream binding protein 1 (LBP-1a)
BRD1	bromodomain containing 1
C1orf116	chromosome 1 open reading frame 116
KANSL1L	KAT8 regulatory NSL complex subunit 1-like
HECTD4	HECT domain containing E3 ubiquitin protein ligase 4
KIF26B	kinesin family member 26B
PHTF2	putative homeodomain transcription factor 2
BDKRB2	bradykinin receptor B2
TLR3	toll-like receptor 3
PAG1	phosphoprotein associated with glycosphingolipid microdomains 1
ESRP1	epithelial splicing regulatory protein 1
ZNF549	zinc finger protein 549
ADAMTS3	ADAM metallopeptidase with thrombospondin type 1 motif, 3
TMEM255A	transmembrane protein 255A
MSL3	male-specific lethal 3 homolog (Drosophila)
TRPM3	transient receptor potential cation channel, subfamily M, member 3
SPHKAP	SPHK1 interactor, AKAP domain containing
ANAPC1	anaphase promoting complex subunit 1
OPHN1	oligophrenin 1
ZNF536	zinc finger protein 536
BAG4	BCL2-associated athanogene 4
KIAA2022	KIAA2022
KIAA0907	KIAA0907
FOXO3	forkhead box O3
TENM1	teneurin transmembrane protein 1
GRID2	glutamate receptor, ionotropic, delta 2
SLC24A2	solute carrier family 24 (sodium/potassium/calcium exchanger), member 2
KLHL15	kelch-like family member 15
SNRK	SNF related kinase
IL16	interleukin 16
TRIM2	tripartite motif containing 2
DUOX2	dual oxidase 2
MKL2	MKL/myocardin-like 2
MICAL2	microtubule associated monooxygenase, calponin and LIM domain containing 2
OGFRL1	opioid growth factor receptor-like 1
FERMT1	fermitin family member 1
IPMK	inositol polyphosphate multikinase
FRK	fyn-related kinase
ZNF615	zinc finger protein 615
PPIA	peptidylprolyl isomerase A (cyclophilin A)
PLCXD2	phosphatidylinositol-specific phospholipase C, X domain containing 2
DIP2B	DIP2 disco-interacting protein 2 homolog B (Drosophila)
RPL37A	ribosomal protein L37a
RBM27	RNA binding motif protein 27
PCDHAC2	protocadherin alpha subfamily C, 2
ZNF275	zinc finger protein 275
HSPA4L	heat shock 70kDa protein 4-like
PPM1E	protein phosphatase, Mg2+/Mn2+ dependent, 1E
SLC4A4	solute carrier family 4 (sodium bicarbonate cotransporter), member 4
DNM3	dynamin 3
FAM19A2	family with sequence similarity 19 (chemokine (C-C motif)-like), member A2
TMEM38B	transmembrane protein 38B
TNRC6B	trinucleotide repeat containing 6B
TLR8	toll-like receptor 8
SH3GL2	SH3-domain GRB2-like 2
INTS2	integrator complex subunit 2
VSTM5	V-set and transmembrane domain containing 5
TAX1BP1	Tax1 (human T-cell leukemia virus type I) binding protein 1
IMPACT	impact RWD domain protein
FAM84A	family with sequence similarity 84, member A
ACSL5	acyl-CoA synthetase long-chain family member 5
SLC8A1	solute carrier family 8 (sodium/calcium exchanger), member 1
EID1	EP300 interacting inhibitor of differentiation 1
TTF2	transcription termination factor, RNA polymerase II
GSPT1	G1 to S phase transition 1
RPAP3	RNA polymerase II associated protein 3
PCDHB16	protocadherin beta 16
CBX5	chromobox homolog 5
STXBP5	syntaxin binding protein 5 (tomosyn)
SHE	Src homology 2 domain containing E
RP11-1026M7.2	Uncharacterized protein
ASAH2	N-acylsphingosine amidohydrolase (non-lysosomal ceramidase) 2
TRIM10	tripartite motif containing 10
MICU3	mitochondrial calcium uptake family, member 3
ELP4	elongator acetyltransferase complex subunit 4
CBX6	chromobox homolog 6
QSER1	glutamine and serine rich 1
BRWD3	bromodomain and WD repeat domain containing 3
RNF19B	ring finger protein 19B
ZNF398	zinc finger protein 398
AC021218.2	Uncharacterized protein
NAALADL2	N-acetylated alpha-linked acidic dipeptidase-like 2
ATP8A1	ATPase, aminophospholipid transporter (APLT), class I, type 8A, member 1
UHRF1BP1	UHRF1 binding protein 1
CENPO	centromere protein O
FAM179B	family with sequence similarity 179, member B
GOLGA1	golgin A1
ARHGEF12	Rho guanine nucleotide exchange factor (GEF) 12
SDC2	syndecan 2
SPRY4	sprouty homolog 4 (Drosophila)
PRDM6	PR domain containing 6
THAP2	THAP domain containing, apoptosis associated protein 2
SMAD2	SMAD family member 2
METTL21A	methyltransferase like 21A
RBM18	RNA binding motif protein 18
WDR72	WD repeat domain 72
KLRB1	killer cell lectin-like receptor subfamily B, member 1
PLEKHH1	pleckstrin homology domain containing, family H (with MyTH4 domain) member 1
NOV	nephroblastoma overexpressed
IPO7	importin 7
SLC16A10	solute carrier family 16 (aromatic amino acid transporter), member 10
WSB1	WD repeat and SOCS box containing 1
PPP4R1L	protein phosphatase 4, regulatory subunit 1-like
IL17RD	interleukin 17 receptor D
C4orf46	chromosome 4 open reading frame 46
CHML	choroideremia-like (Rab escort protein 2)
ZBTB8A	zinc finger and BTB domain containing 8A
RRM2B	ribonucleotide reductase M2 B (TP53 inducible)
RNF150	ring finger protein 150
PAXIP1	PAX interacting (with transcription-activation domain) protein 1
KDELC2	KDEL (Lys-Asp-Glu-Leu) containing 2
UBQLN1	ubiquilin 1
GOLIM4	golgi integral membrane protein 4
ECM2	extracellular matrix protein 2, female organ and adipocyte specific
SLAIN2	SLAIN motif family, member 2
CLPX	caseinolytic mitochondrial matrix peptidase chaperone subunit
MDC1	mediator of DNA-damage checkpoint 1
MTMR8	myotubularin related protein 8
MEI4	meiosis-specific 4 homolog (S. cerevisiae)
EMP1	epithelial membrane protein 1
CLEC1B	C-type lectin domain family 1, member B
COL25A1	collagen, type XXV, alpha 1
BICD1	bicaudal D homolog 1 (Drosophila)
RNF152	ring finger protein 152
RBL1	retinoblastoma-like 1 (p107)
UBR1	ubiquitin protein ligase E3 component n-recognin 1
CLSTN1	calsyntenin 1
PRPF4B	pre-mRNA processing factor 4B
ROR2	receptor tyrosine kinase-like orphan receptor 2
LTB	lymphotoxin beta (TNF superfamily, member 3)
ARL10	ADP-ribosylation factor-like 10
EOMES	eomesodermin
PIK3CG	phosphatidylinositol-4,5-bisphosphate 3-kinase, catalytic subunit gamma
DUSP19	dual specificity phosphatase 19
VPS37B	vacuolar protein sorting 37 homolog B (S. cerevisiae)
SPATA17	spermatogenesis associated 17
PWWP2A	PWWP domain containing 2A
SCAI	suppressor of cancer cell invasion
SRD5A1	steroid-5-alpha-reductase, alpha polypeptide 1 (3-oxo-5 alpha-steroid delta 4-dehydrogenase alpha 1)
2019-03-05	membrane-associated ring finger (C3HC4) 5
WDYHV1	WDYHV motif containing 1
TMCC3	transmembrane and coiled-coil domain family 3
PEX3	peroxisomal biogenesis factor 3
PPP1CB	protein phosphatase 1, catalytic subunit, beta isozyme
ERVMER34-1	endogenous retrovirus group MER34, member 1
AGO1	argonaute RISC catalytic component 1
CCL4L1	chemokine (C-C motif) ligand 4-like 1
PROSC	proline synthetase co-transcribed homolog (bacterial)
GIGYF1	GRB10 interacting GYF protein 1
TMEM236	transmembrane protein 236
TMEM236
BAZ2B	bromodomain adjacent to zinc finger domain, 2B
ZNF286A	Zinc finger protein 286A
FPR2	formyl peptide receptor 2
YTHDC1	YTH domain containing 1
UNC79	unc-79 homolog (C. elegans)
FAM81A	family with sequence similarity 81, member A
KAT6A	K(lysine) acetyltransferase 6A
ATXN1	ataxin 1
ZDHHC20	zinc finger, DHHC-type containing 20
GABPB2	GA binding protein transcription factor, beta subunit 2
RBM33	RNA binding motif protein 33
PRSS21	protease, serine, 21 (testisin)
LRP6	low density lipoprotein receptor-related protein 6
FAM76B	family with sequence similarity 76, member B
CPEB3	cytoplasmic polyadenylation element binding protein 3
SRSF5	serine/arginine-rich splicing factor 5
HOXB2	homeobox B2
IFNE	interferon, epsilon
PROK1	prokineticin 1
PRMT2	protein arginine methyltransferase 2
CARKD	carbohydrate kinase domain containing
HMGA2	high mobility group AT-hook 2
KIAA1009	KIAA1009
PEX13	peroxisomal biogenesis factor 13
KLHL24	kelch-like family member 24
TGFB2	transforming growth factor, beta 2
USP46	ubiquitin specific peptidase 46
COBL	cordon-bleu WH2 repeat protein
CSNK1G1	casein kinase 1, gamma 1
PURB	purine-rich element binding protein B
SH3BGRL2	SH3 domain binding glutamic acid-rich protein like 2
FEM1C	fem-1 homolog c (C. elegans)
FAM63B	family with sequence similarity 63, member B
PRDM10	PR domain containing 10
AKNA	AT-hook transcription factor
NUPL1	nucleoporin like 1
PLD1	phospholipase D1, phosphatidylcholine-specific
PAX5	paired box 5
ZNF776	zinc finger protein 776
FBXO40	F-box protein 40
ZSWIM3	zinc finger, SWIM-type containing 3
SLC7A14	solute carrier family 7, member 14
POU6F2	POU class 6 homeobox 2
TRPM6	transient receptor potential cation channel, subfamily M, member 6
GAB3	GRB2-associated binding protein 3
TET1	tet methylcytosine dioxygenase 1
PER3	period circadian clock 3
SLFN13	schlafen family member 13
SEC14L5	SEC14-like 5 (S. cerevisiae)
GRIP1	glutamate receptor interacting protein 1
GLDN	gliomedin
RAD21	RAD21 homolog (S. pombe)
NFIA	nuclear factor I/A
SEC62	SEC62 homolog (S. cerevisiae)
PLA2G2D	phospholipase A2, group IID
CHERP	calcium homeostasis endoplasmic reticulum protein
SYT2	synaptotagmin II
TMEM257	transmembrane protein 257
GOLGA8A	golgin A8 family, member A
CNTF	ciliary neurotrophic factor
ZBTB11	zinc finger and BTB domain containing 11
ALKBH8	alkB, alkylation repair homolog 8 (E. coli)
GOLGA8N	golgin A8 family, member N
SPECC1L	sperm antigen with calponin homology and coiled-coil domains 1-like
NFATC2	nuclear factor of activated T-cells, cytoplasmic, calcineurin-dependent 2
NCOA2	nuclear receptor coactivator 2
FAM135B	family with sequence similarity 135, member B
SLC30A6	solute carrier family 30 (zinc transporter), member 6
JMJD1C	jumonji domain containing 1C
ALX4	ALX homeobox 4
ZNF831	zinc finger protein 831
RGL1	ral guanine nucleotide dissociation stimulator-like 1
KIAA2018	KIAA2018
SNX29	sorting nexin 29
PRKACB	protein kinase, cAMP-dependent, catalytic, beta
GOLGA6L9	Homo sapiens golgin subfamily A member 6-like protein 9-like (LOC101927658), mRNA.
CBL	Cbl proto-oncogene, E3 ubiquitin protein ligase
HRNR	hornerin
LARGE	like-glycosyltransferase
HAVCR2	hepatitis A virus cellular receptor 2
TRIM44	tripartite motif containing 44
NOX5	NADPH oxidase, EF-hand calcium binding domain 5
DISC1	disrupted in schizophrenia 1
CHD2	chromodomain helicase DNA binding protein 2
UBXN2B	UBX domain protein 2B
BSND	Bartter syndrome, infantile, with sensorineural deafness (Barttin)
VSX2	visual system homeobox 2
SLCO1A2	solute carrier organic anion transporter family, member 1A2
GOLGA6L9	golgin A6 family-like 9
FAM198B	family with sequence similarity 198, member B
SULT1C4	sulfotransferase family, cytosolic, 1C, member 4
PRICKLE2	prickle homolog 2 (Drosophila)
RP11-766F14.2	Protein LOC285556
INPP4A	inositol polyphosphate-4-phosphatase, type I, 107kDa
TTC9	tetratricopeptide repeat domain 9
ITGB8	integrin, beta 8
MTR	5-methyltetrahydrofolate-homocysteine methyltransferase
GHITM	growth hormone inducible transmembrane protein
2019-03-07	membrane-associated ring finger (C3HC4) 7, E3 ubiquitin protein ligase
SNTB2	syntrophin, beta 2 (dystrophin-associated protein A1, 59kDa, basic component 2)
GNB4	guanine nucleotide binding protein (G protein), beta polypeptide 4
TASP1	taspase, threonine aspartase, 1
CAMKK2	calcium/calmodulin-dependent protein kinase kinase 2, beta
SESTD1	SEC14 and spectrin domains 1
SLC35B4	solute carrier family 35 (UDP-xylose/UDP-N-acetylglucosamine transporter), member B4
UBE2G2	ubiquitin-conjugating enzyme E2G 2
ADH6	alcohol dehydrogenase 6 (class V)
EID2	EP300 interacting inhibitor of differentiation 2
NCR3LG1	natural killer cell cytotoxicity receptor 3 ligand 1
SP3	Sp3 transcription factor
CHD9	chromodomain helicase DNA binding protein 9
FAM26E	family with sequence similarity 26, member E
UBE2QL1	ubiquitin-conjugating enzyme E2Q family-like 1
SHANK2	SH3 and multiple ankyrin repeat domains 2
URB2	URB2 ribosome biogenesis 2 homolog (S. cerevisiae)
ZYG11B	zyg-11 family member B, cell cycle regulator
IDE	insulin-degrading enzyme
RNF44	ring finger protein 44
DOK5	docking protein 5
PLA2R1	phospholipase A2 receptor 1, 180kDa
TRMT2B	tRNA methyltransferase 2 homolog B (S. cerevisiae)
ARHGAP23	Rho GTPase activating protein 23
ZFP28	ZFP28 zinc finger protein
ST8SIA2	ST8 alpha-N-acetyl-neuraminide alpha-2,8-sialyltransferase 2
RASEF	RAS and EF-hand domain containing
AFF3	AF4/FMR2 family, member 3
DSEL	dermatan sulfate epimerase-like
ZBTB1	zinc finger and BTB domain containing 1
PPIP5K2	diphosphoinositol pentakisphosphate kinase 2
CAV2	caveolin 2
TNIK	TRAF2 and NCK interacting kinase
LINS	lines homolog (Drosophila)
AGTPBP1	ATP/GTP binding protein 1
LSM11	LSM11, U7 small nuclear RNA associated
PRDM5	PR domain containing 5
GLI3	GLI family zinc finger 3
CCNT2	cyclin T2
IDS	Iduronate 2-sulfatase (Hunter syndrome), isoform CRA_e; Iduronate 2-sulfatase 14 kDa chain; cDNA FLJ42669 fis, clone BRAMY2022168, highly similar to IDURONATE 2-SULFATASE
MAF	v-maf avian musculoaponeurotic fibrosarcoma oncogene homolog
BCL2	B-cell CLL/lymphoma 2
SAMD4A	sterile alpha motif domain containing 4A
PTPRG	protein tyrosine phosphatase, receptor type, G
RAB2A	RAB2A, member RAS oncogene family
PHF23	PHD finger protein 23
MCU	mitochondrial calcium uniporter
UBE3A	ubiquitin protein ligase E3A
THOC2	THO complex 2
ZNF112	zinc finger protein 112
LRIG2	leucine-rich repeats and immunoglobulin-like domains 2
ERMN	ermin, ERM-like protein
EXOC8	exocyst complex component 8
EPHA6	EPH receptor A6
ZRANB2	zinc finger, RAN-binding domain containing 2
ZNF160	zinc finger protein 160
NLGN2	neuroligin 2
TSC1	tuberous sclerosis 1
MDM4	Mdm4 p53 binding protein homolog (mouse)
FAM222B	family with sequence similarity 222, member B
RAB3GAP2	RAB3 GTPase activating protein subunit 2 (non-catalytic)
IDI1	isopentenyl-diphosphate delta isomerase 1
ZCCHC14	zinc finger, CCHC domain containing 14
ZNF106	zinc finger protein 106
ERLIN2	ER lipid raft associated 2
PPIC	peptidylprolyl isomerase C (cyclophilin C)
CNKSR2	connector enhancer of kinase suppressor of Ras 2
LINGO2	leucine rich repeat and Ig domain containing 2
ZFP42	ZFP42 zinc finger protein
2019-03-06	membrane-associated ring finger (C3HC4) 6, E3 ubiquitin protein ligase
COLGALT1	collagen beta(1-O)galactosyltransferase 1
LRRC8C	leucine rich repeat containing 8 family, member C
ROR1	receptor tyrosine kinase-like orphan receptor 1
SLC15A2	solute carrier family 15 (oligopeptide transporter), member 2
BRCA1	breast cancer 1, early onset
KATNAL1	katanin p60 subunit A-like 1
POGK	pogo transposable element with KRAB domain
WIPF1	WAS/WASL interacting protein family, member 1
ZNF264	zinc finger protein 264
PRPS2	phosphoribosyl pyrophosphate synthetase 2
UBE2K	ubiquitin-conjugating enzyme E2K
COX11	cytochrome c oxidase assembly homolog 11 (yeast)
OSBPL3	oxysterol binding protein-like 3
SLC25A16	solute carrier family 25 (mitochondrial carrier; Graves disease autoantigen), member 16
CTDSPL2	CTD (carboxy-terminal domain, RNA polymerase II, polypeptide A) small phosphatase like 2
CHRM3	cholinergic receptor, muscarinic 3
ITGBL1	integrin, beta-like 1 (with EGF-like repeat domains)
UBE2H	ubiquitin-conjugating enzyme E2H
IVNS1ABP	influenza virus NS1A binding protein
MSL2	male-specific lethal 2 homolog (Drosophila)
BMP5	bone morphogenetic protein 5
RWDD4	RWD domain containing 4
GPC4	glypican 4
DAGLA	diacylglycerol lipase, alpha
GPALPP1	GPALPP motifs containing 1
NDUFS1	NADH dehydrogenase (ubiquinone) Fe-S protein 1, 75kDa (NADH-coenzyme Q reductase)
MAN2A1	mannosidase, alpha, class 2A, member 1
MARK1	MAP/microtubule affinity-regulating kinase 1
AKAP13	A kinase (PRKA) anchor protein 13
ZNF780A	zinc finger protein 780A
KBTBD7	kelch repeat and BTB (POZ) domain containing 7
MAPK9	mitogen-activated protein kinase 9
AHRR	aryl-hydrocarbon receptor repressor
UNC5D	unc-5 homolog D (C. elegans)
AGGF1	angiogenic factor with G patch and FHA domains 1
PDE3B	phosphodiesterase 3B, cGMP-inhibited
CD36	CD36 molecule (thrombospondin receptor)
DYNLL2	dynein, light chain, LC8-type 2
MAP3K9	mitogen-activated protein kinase kinase kinase 9
TWISTNB	TWIST neighbor
TMEM245	transmembrane protein 245
IFRD1	interferon-related developmental regulator 1
HEY1	hairy/enhancer-of-split related with YRPW motif 1
TRPS1	trichorhinophalangeal syndrome I
SUSD1	sushi domain containing 1
TCEAL3	transcription elongation factor A (SII)-like 3
TLL2	tolloid-like 2
TMEM218	transmembrane protein 218
RFFL	ring finger and FYVE-like domain containing E3 ubiquitin protein ligase
SMYD1	SET and MYND domain containing 1
HOXB5	homeobox B5
HAUS2	HAUS augmin-like complex, subunit 2
RAD51L3-RFFL	Uncharacterized protein
GBE1	glucan (1,4-alpha-), branching enzyme 1
ZNF605	zinc finger protein 605
PPP1R3G	protein phosphatase 1, regulatory subunit 3G
ZNF195	zinc finger protein 195
EIF3H	eukaryotic translation initiation factor 3, subunit H
ZIK1	zinc finger protein interacting with K protein 1
H2AFV	H2A histone family, member V
U2SURP	U2 snRNP-associated SURP domain containing
C2ORF15	Uncharacterized protein C2orf15
TMEM144	transmembrane protein 144
VCAN	versican
PPP2R5E	protein phosphatase 2, regulatory subunit B', epsilon isoform
STX2	syntaxin 2
PCSK1	proprotein convertase subtilisin/kexin type 1
ZNF281	zinc finger protein 281
ZNF527	zinc finger protein 527
GTDC1	glycosyltransferase-like domain containing 1
P4HA1	prolyl 4-hydroxylase, alpha polypeptide I
RC3H1	ring finger and CCCH-type domains 1
HNRNPUL2	heterogeneous nuclear ribonucleoprotein U-like 2
FUT6	fucosyltransferase 6 (alpha (1,3) fucosyltransferase)
TBCK	TBC1 domain containing kinase
RBM20	RNA binding motif protein 20
BROX	BRO1 domain and CAAX motif containing
XIAP	X-linked inhibitor of apoptosis
PDE5A	phosphodiesterase 5A, cGMP-specific
HS3ST3A1	heparan sulfate (glucosamine) 3-O-sulfotransferase 3A1
ANKRD32	ankyrin repeat domain 32
POLR3A	polymerase (RNA) III (DNA directed) polypeptide A, 155kDa
SS18L1	synovial sarcoma translocation gene on chromosome 18-like 1
METTL8	methyltransferase like 8
FNBP1L	formin binding protein 1-like
CLASP2	cytoplasmic linker associated protein 2
RCAN3	RCAN family member 3
TARSL2	threonyl-tRNA synthetase-like 2
ORC2	origin recognition complex, subunit 2
FGF12	fibroblast growth factor 12
ARHGEF6	Rac/Cdc42 guanine nucleotide exchange factor (GEF) 6
SMIM14	small integral membrane protein 14
TMEM194A	transmembrane protein 194A
LACE1	lactation elevated 1
SYNPO2	synaptopodin 2
KRIT1	KRIT1, ankyrin repeat containing
LGALS8	lectin, galactoside-binding, soluble, 8
TIGD6	tigger transposable element derived 6
FCRL3	Fc receptor-like 3
TAB3	TGF-beta activated kinase 1/MAP3K7 binding protein 3
KANK2	KN motif and ankyrin repeat domains 2
FTSJ2	FtsJ RNA methyltransferase homolog 2 (E. coli)
ABTB2	ankyrin repeat and BTB (POZ) domain containing 2
CCDC80	coiled-coil domain containing 80
NPHP3	nephronophthisis 3 (adolescent)
TAOK3	TAO kinase 3
PHACTR2	phosphatase and actin regulator 2
PIAS2	protein inhibitor of activated STAT, 2
HECTD2	HECT domain containing E3 ubiquitin protein ligase 2
ABHD13	abhydrolase domain containing 13
RUNX1	runt-related transcription factor 1
GRK4	G protein-coupled receptor kinase 4
PTBP3	polypyrimidine tract binding protein 3
KCTD12	potassium channel tetramerization domain containing 12
RNF24	ring finger protein 24
BHLHE41	basic helix-loop-helix family, member e41
ZFP82	ZFP82 zinc finger protein
ZMYM2	zinc finger, MYM-type 2
ROBO1	roundabout, axon guidance receptor, homolog 1 (Drosophila)
SCO1	SCO1 cytochrome c oxidase assembly protein
HCN1	hyperpolarization activated cyclic nucleotide-gated potassium channel 1
NUP35	nucleoporin 35kDa
YWHAZ	tyrosine 3-monooxygenase/tryptophan 5-monooxygenase activation protein, zeta polypeptide
SGCB	sarcoglycan, beta (43kDa dystrophin-associated glycoprotein)
SET	SET nuclear oncogene
ZC3H15	zinc finger CCCH-type containing 15
MAML2	mastermind-like 2 (Drosophila)
RANBP6	RAN binding protein 6
SEPHS2	selenophosphate synthetase 2
ATRX	alpha thalassemia/mental retardation syndrome X-linked
ABCD2	ATP-binding cassette, sub-family D (ALD), member 2
ATP11B	ATPase, class VI, type 11B
ACVR2A	activin A receptor, type IIA
GLP2R	glucagon-like peptide 2 receptor
RNF11	ring finger protein 11
APBB2	amyloid beta (A4) precursor protein-binding, family B, member 2
SLC23A2	solute carrier family 23 (ascorbic acid transporter), member 2
TMEM139	transmembrane protein 139
RNF217	ring finger protein 217
ZNF486	zinc finger protein 486
RAE1	ribonucleic acid export 1
KIAA1549L	KIAA1549-like
TOR1AIP2	torsin A interacting protein 2
PEX19	peroxisomal biogenesis factor 19
MED13	mediator complex subunit 13
TLR6	toll-like receptor 6
TMEM169	transmembrane protein 169
MRPS25	mitochondrial ribosomal protein S25
NT5DC3	5'-nucleotidase domain containing 3
ACVR1	activin A receptor, type I
RP11-770J1.4
FAM219A	family with sequence similarity 219, member A
RAB37	RAB37, member RAS oncogene family
ASH1L	ash1 (absent, small, or homeotic)-like (Drosophila)
KCNQ5	potassium voltage-gated channel, KQT-like subfamily, member 5
PCDHA13	protocadherin alpha 13
FAIM2	Fas apoptotic inhibitory molecule 2
GAD2	glutamate decarboxylase 2 (pancreatic islets and brain, 65kDa)
ANKRD13A	ankyrin repeat domain 13A
CTNND2	catenin (cadherin-associated protein), delta 2
SLITRK1	SLIT and NTRK-like family, member 1
PDZRN3	PDZ domain containing ring finger 3
PDE1C	phosphodiesterase 1C, calmodulin-dependent 70kDa
KCTD7	potassium channel tetramerization domain containing 7
MRVI1	murine retrovirus integration site 1 homolog
C5AR2	complement component 5a receptor 2
SDK2	sidekick cell adhesion molecule 2
TMEM229B	transmembrane protein 229B
MFN2	mitofusin 2
ZNF558	zinc finger protein 558
RAB44	RAB44, member RAS oncogene family
C1QTNF5	C1q and tumor necrosis factor related protein 5
SPRY3	sprouty homolog 3 (Drosophila)
AQP2	aquaporin 2 (collecting duct)
MFRP	membrane frizzled-related protein
SLC36A2	solute carrier family 36 (proton/amino acid symporter), member 2
PCYT1B	phosphate cytidylyltransferase 1, choline, beta
SLC39A6	solute carrier family 39 (zinc transporter), member 6
C10orf128	chromosome 10 open reading frame 128
OR2C3	olfactory receptor, family 2, subfamily C, member 3
TET2	tet methylcytosine dioxygenase 2
RCC2	regulator of chromosome condensation 2
PIWIL2	piwi-like RNA-mediated gene silencing 2
ULK1	unc-51 like autophagy activating kinase 1
TNR	tenascin R
ARRDC4	arrestin domain containing 4
SPTLC3	serine palmitoyltransferase, long chain base subunit 3
SSR1	signal sequence receptor, alpha
ASCC3	activating signal cointegrator 1 complex subunit 3
FAM83F	family with sequence similarity 83, member F
BCAS1	breast carcinoma amplified sequence 1
MCTP2	multiple C2 domains, transmembrane 2
KIAA1644	KIAA1644
SLC30A8	solute carrier family 30 (zinc transporter), member 8
ZNF30	zinc finger protein 30
ITGB1	integrin, beta 1 (fibronectin receptor, beta polypeptide, antigen CD29 includes MDF2, MSK12)
ENOSF1	enolase superfamily member 1
SLC5A1	solute carrier family 5 (sodium/glucose cotransporter), member 1
ATRNL1	attractin-like 1
DCTN2	dynactin 2 (p50)
SRRM4	serine/arginine repetitive matrix 4
DPYSL3	dihydropyrimidinase-like 3
RORB	RAR-related orphan receptor B
HTR2C	5-hydroxytryptamine (serotonin) receptor 2C, G protein-coupled
TTC21B	tetratricopeptide repeat domain 21B
KCNK12	potassium channel, subfamily K, member 12
PGM2L1	phosphoglucomutase 2-like 1
ABCB5	ATP-binding cassette, sub-family B (MDR/TAP), member 5
WARS2	tryptophanyl tRNA synthetase 2, mitochondrial
PCDHA6	protocadherin alpha 6
PTPRN2	protein tyrosine phosphatase, receptor type, N polypeptide 2
ZNF304	zinc finger protein 304
FAM46D	family with sequence similarity 46, member D
LTBP2	latent transforming growth factor beta binding protein 2
KIAA1407	KIAA1407
AHR	aryl hydrocarbon receptor
CRCP	CGRP receptor component
EVC	Ellis van Creveld syndrome
PCDHA12	protocadherin alpha 12
B3GALT5	UDP-Gal:betaGlcNAc beta 1,3-galactosyltransferase, polypeptide 5
SCN7A	sodium channel, voltage-gated, type VII, alpha subunit
SIX4	SIX homeobox 4
PATE3	prostate and testis expressed 3
STXBP5L	syntaxin binding protein 5-like
PRR23C	proline rich 23C
ZNF674	zinc finger protein 674
ZNF609	zinc finger protein 609
IGF2BP2	insulin-like growth factor 2 mRNA binding protein 2
PCDHA10	protocadherin alpha 10
ANK3	ankyrin 3, node of Ranvier (ankyrin G)
AL033381.1	Uncharacterized protein; cDNA FLJ34594 fis, clone KIDNE2009109
EHD4	EH-domain containing 4
ASB4	ankyrin repeat and SOCS box containing 4
C21orf128	chromosome 21 open reading frame 128
WNK3	WNK lysine deficient protein kinase 3
SYNDIG1L	synapse differentiation inducing 1-like
UBQLNL	ubiquilin-like
TCEAL5	transcription elongation factor A (SII)-like 5
PCDHA7	protocadherin alpha 7
PIGX	phosphatidylinositol glycan anchor biosynthesis, class X
PTGS1	prostaglandin-endoperoxide synthase 1 (prostaglandin G/H synthase and cyclooxygenase)
PCDHA3	protocadherin alpha 3
SLC2A10	solute carrier family 2 (facilitated glucose transporter), member 10
ARHGAP32	Rho GTPase activating protein 32
CD160	CD160 molecule
MET	met proto-oncogene
GLYR1	glyoxylate reductase 1 homolog (Arabidopsis)
MMP19	matrix metallopeptidase 19
C5orf28	chromosome 5 open reading frame 28
RUNX1T1	runt-related transcription factor 1; translocated to, 1 (cyclin D-related)
HERPUD2	HERPUD family member 2
PCDHA9	protocadherin alpha 9
SLC6A1	solute carrier family 6 (neurotransmitter transporter), member 1
PCDHA2	protocadherin alpha 2
ARNT2	aryl-hydrocarbon receptor nuclear translocator 2
MTTP	microsomal triglyceride transfer protein
GPR155	G protein-coupled receptor 155
IRF4	interferon regulatory factor 4
PHLPP2	PH domain and leucine rich repeat protein phosphatase 2
ZNF154	zinc finger protein 154
SORD	sorbitol dehydrogenase
GART	phosphoribosylglycinamide formyltransferase, phosphoribosylglycinamide synthetase, phosphoribosylaminoimidazole synthetase
XAF1	XIAP associated factor 1
FRMD6	FERM domain containing 6
EGFR	epidermal growth factor receptor
DGKG	diacylglycerol kinase, gamma 90kDa
AGBL4	ATP/GTP binding protein-like 4
FLRT3	fibronectin leucine rich transmembrane protein 3
ADAMTS19	ADAM metallopeptidase with thrombospondin type 1 motif, 19
CTD-2368P22.1	HCG1811579; Uncharacterized protein
PCDHAC1	protocadherin alpha subfamily C, 1
SCN1A	sodium channel, voltage-gated, type I, alpha subunit
DCHS2	dachsous cadherin-related 2
ADAM12	ADAM metallopeptidase domain 12
C1orf198	chromosome 1 open reading frame 198
UNC13B	unc-13 homolog B (C. elegans)
TNFRSF14	tumor necrosis factor receptor superfamily, member 14
ZNF697	zinc finger protein 697
FCRL2	Fc receptor-like 2
SMARCA2	SWI/SNF related, matrix associated, actin dependent regulator of chromatin, subfamily a, member 2
DRGX	dorsal root ganglia homeobox
MLLT4	myeloid/lymphoid or mixed-lineage leukemia (trithorax homolog, Drosophila); translocated to, 4
ZSCAN23	zinc finger and SCAN domain containing 23
ZNF790	zinc finger protein 790
PHACTR4	phosphatase and actin regulator 4
GJA3	gap junction protein, alpha 3, 46kDa
TEAD2	TEA domain family member 2
ACBD5	acyl-CoA binding domain containing 5
KIAA1257	KIAA1257
SHPRH	SNF2 histone linker PHD RING helicase, E3 ubiquitin protein ligase
PHF20L1	PHD finger protein 20-like 1
DZIP3	DAZ interacting zinc finger protein 3
GOLGA8J	golgin A8 family, member J
ITPRIP	inositol 1,4,5-trisphosphate receptor interacting protein
NPAP1	nuclear pore associated protein 1
GPR158	G protein-coupled receptor 158
ATP1A2	ATPase, Na+/K+ transporting, alpha 2 polypeptide
WDR52	WD repeat domain 52
FNIP2	folliculin interacting protein 2
AWAT2	acyl-CoA wax alcohol acyltransferase 2
SCN3A	sodium channel, voltage-gated, type III, alpha subunit
PCDHA1	protocadherin alpha 1
AC137932.1
PCDHA8	protocadherin alpha 8
KAT6B	K(lysine) acetyltransferase 6B
ZSCAN22	zinc finger and SCAN domain containing 22
SYT9	synaptotagmin IX
VEZF1	vascular endothelial zinc finger 1
TEX26	testis expressed 26
MYOG	myogenin (myogenic factor 4)
MLLT6	myeloid/lymphoid or mixed-lineage leukemia (trithorax homolog, Drosophila); translocated to, 6
DDR1	discoidin domain receptor tyrosine kinase 1
ASPRV1	aspartic peptidase, retroviral-like 1
ENOX2	ecto-NOX disulfide-thiol exchanger 2
GOLGA6D	golgin A6 family, member D
GLIPR1L2	GLI pathogenesis-related 1 like 2
ADAM19	ADAM metallopeptidase domain 19
RP11-247C2.2	HCG2004779; Uncharacterized protein
HIVEP3	human immunodeficiency virus type I enhancer binding protein 3
PAPOLB	poly(A) polymerase beta (testis specific)
F2R	coagulation factor II (thrombin) receptor
PLCXD1	phosphatidylinositol-specific phospholipase C, X domain containing 1
ALPK3	alpha-kinase 3
UBL4A	ubiquitin-like 4A
SLC2A3	solute carrier family 2 (facilitated glucose transporter), member 3
SRSF2	serine/arginine-rich splicing factor 2
MYO3B	myosin IIIB
FREM1	FRAS1 related extracellular matrix 1
TMEM192	transmembrane protein 192
C1QTNF7	C1q and tumor necrosis factor related protein 7
NFAM1	NFAT activating protein with ITAM motif 1
ARRDC3	arrestin domain containing 3
SLC2A14	solute carrier family 2 (facilitated glucose transporter), member 14
PCDHA11	protocadherin alpha 11
PAQR7	progestin and adipoQ receptor family member VII
GPR83	G protein-coupled receptor 83
CEP170	centrosomal protein 170kDa
SAMD8	sterile alpha motif domain containing 8
ATP8B3	ATPase, aminophospholipid transporter, class I, type 8B, member 3
GRHL1	grainyhead-like 1 (Drosophila)
GRHL2	grainyhead-like 2 (Drosophila)
DCX	doublecortin
CYP2U1	cytochrome P450, family 2, subfamily U, polypeptide 1
AMMECR1L	AMMECR1-like
PCDHA4	protocadherin alpha 4
VPS13C	vacuolar protein sorting 13 homolog C (S. cerevisiae)
WDR6	WD repeat domain 6
TRIM37	tripartite motif containing 37
PUM2	pumilio RNA-binding family member 2
METTL7A	methyltransferase like 7A
CD46	CD46 molecule, complement regulatory protein
RP11-1055B8.7	BAH and coiled-coil domain-containing protein 1
RREB1	ras responsive element binding protein 1
MINPP1	multiple inositol-polyphosphate phosphatase 1
MLEC	malectin
TET3	tet methylcytosine dioxygenase 3
ANKRD26	ankyrin repeat domain 26
CRIM1	cysteine rich transmembrane BMP regulator 1 (chordin-like)
[truncated: 1,377 more rows]

## Sheet: (B) mml-miR-204-5p
mml-miR-204-5p Predicted Target Genes	Full Gene Name	mRNAs Evaluated
JRKL	jerky homolog-like (mouse)	AIMP1
PHOX2B	paired-like homeobox 2b	BMP2
RAB22A	RAB22A, member RAS oncogene family	CCL1
SMIM13	small integral membrane protein 13	CCL11
COX5A	cytochrome c oxidase subunit Va	CCL13
SOX4	SRY (sex determining region Y)-box 4	CCL17
FOXC1	forkhead box C1	CCL2
FAM160A2	family with sequence similarity 160, member A2	CCL20
MAPRE2	microtubule-associated protein, RP/EB family, member 2	CCL23
SLC37A3	solute carrier family 37, member 3	CCL5
CAMK1	calcium/calmodulin-dependent protein kinase I	CCR1
VWA8	von Willebrand factor A domain containing 8	CCR3
EPHA7	EPH receptor A7	CCR4
SRP19	signal recognition particle 19kDa	CCR6
NRBF2	nuclear receptor binding factor 2	CCR8
RIMS2	regulating synaptic membrane exocytosis 2	CD40LG
RAB1A	RAB1A, member RAS oncogene family	CD70
C10orf11	chromosome 10 open reading frame 11	CSF1
LIN28A	lin-28 homolog A (C. elegans)	CSF2
AP1S1	adaptor-related protein complex 1, sigma 1 subunit	CX3CL1
AAED1	AhpC/TSA antioxidant enzyme domain containing 1	CX3CR1
DCAF16	DDB1 and CUL4 associated factor 16	CXCL11
BIN1	bridging integrator 1	CXCL12
CCNY	cyclin Y	CXCL13
FGF20	fibroblast growth factor 20	CXCL6
SSRP1	structure specific recognition protein 1	CXCL9
CTNNBIP1	catenin, beta interacting protein 1	CXCR1
ALPL	alkaline phosphatase, liver/bone/kidney	CXCR4
PIK3CB	phosphatidylinositol-4,5-bisphosphate 3-kinase, catalytic subunit beta	FASLG
XKR9	XK, Kell blood group complex subunit-related family, member 9	IFNA2
HMGA2	high mobility group AT-hook 2	IFNG
C21orf33	chromosome 21 open reading frame 33	IL10RA
CTB-186H2.3	Uncharacterized protein	IL10RB
DVL3	dishevelled segment polarity protein 3	IL11RA
HELLS	helicase, lymphoid-specific	IL12B
COL5A3	collagen, type V, alpha 3	IL12RB1
AP2A2	adaptor-related protein complex 2, alpha 2 subunit	IL12RB2
ST7	suppression of tumorigenicity 7	IL13
ANKRD13C	ankyrin repeat domain 13C	IL15
ZNF521	zinc finger protein 521	IL15RA
ACADL	acyl-CoA dehydrogenase, long chain	IL16
RHOBTB1	Rho-related BTB domain containing 1	IL17A
CHP1	calcineurin-like EF-hand protein 1	IL17F
TTYH1	tweety family member 1	IL1A
SMOC1	SPARC related modular calcium binding 1	IL1B
PSME1	proteasome (prosome, macropain) activator subunit 1 (PA28 alpha)	IL1R1
ELOVL6	ELOVL fatty acid elongase 6	IL1R2
DNAJC13	DnaJ (Hsp40) homolog, subfamily C, member 13	IL1RN
SASS6	spindle assembly 6 homolog (C. elegans)	IL2
SLC43A1	solute carrier family 43 (amino acid system L transporter), member 1	IL20
CHD5	chromodomain helicase DNA binding protein 5	IL21
SLC35B3	solute carrier family 35 (adenosine 3'-phospho 5'-phosphosulfate transporter), member B3	IL2RA
EFNB3	ephrin-B3	IL2RB
RRAGC	Ras-related GTP binding C	IL2RG
KHDRBS3	KH domain containing, RNA binding, signal transduction associated 3	IL3
ZCCHC24	zinc finger, CCHC domain containing 24	IL4
NOVA1	neuro-oncological ventral antigen 1	IL5
DNM2	dynamin 2	IL5RA
FAM168B	family with sequence similarity 168, member B	IL6
TOX3	TOX high mobility group box family member 3	IL6R
KXD1	KxDL motif containing 1	IL7
ELAVL3	ELAV like neuron-specific RNA binding protein 3	CXCL8
MLLT3	myeloid/lymphoid or mixed-lineage leukemia (trithorax homolog, Drosophila); translocated to, 3	CXCR2
HMX1	H6 family homeobox 1	IL9R
MOCS2	molybdenum cofactor synthesis 2	IL13RA2
C16orf72	chromosome 16 open reading frame 72	LOC710618
EZR	ezrin	IL9
JAK2	Janus kinase 2	CCL7
HSPH1	heat shock 105kDa/110kDa protein 1	CCL26
MTMR7	myotubularin related protein 7	LTA
DNAJB4	DnaJ (Hsp40) homolog, subfamily B, member 4	MIF
TMEM181	transmembrane protein 181	NAMPT
SSR3	signal sequence receptor, gamma (translocon-associated protein gamma)	OSM
ACSL4	acyl-CoA synthetase long-chain family member 4	PF4
SPRY3	sprouty homolog 3 (Drosophila)	SPP1
TMBIM1	transmembrane BAX inhibitor motif containing 1	TNF
SFXN2	sideroflexin 2	TNFRSF11B
TNRC6B	trinucleotide repeat containing 6B	TNFSF10
SF3B1	splicing factor 3b, subunit 1, 155kDa	TNFSF11
SGIP1	SH3-domain GRB2-like (endophilin) interacting protein 1	TNFSF13B
RPA3-AS1	RPA3 antisense RNA 1	TNFSF14
NEUROG2	neurogenin 2	TNFSF4
ARHGEF37	Rho guanine nucleotide exchange factor (GEF) 37	VEGFA
MMGT1	membrane magnesium transporter 1	XCL1
TMEM178B	transmembrane protein 178B	NFKBIA
ANGPT1	angiopoietin 1	CD36
RHOT1	ras homolog family member T1	STAT1
ARX	aristaless related homeobox	MAFB
ETV3	ets variant 3
GUCD1	guanylyl cyclase domain containing 1
MARCH3	membrane-associated ring finger (C3HC4) 3, E3 ubiquitin protein ligase
EPHB2	EPH receptor B2
ZBTB7A	zinc finger and BTB domain containing 7A
SIRT1	sirtuin 1
NCOA7	nuclear receptor coactivator 7
SLA2	Src-like-adaptor 2
TGFBR2	transforming growth factor, beta receptor II (70/80kDa)
NR4A2	nuclear receptor subfamily 4, group A, member 2
MANEAL	mannosidase, endo-alpha-like
ZNF654	zinc finger protein 654
FRS2	fibroblast growth factor receptor substrate 2
IGFBP5	insulin-like growth factor binding protein 5
TPRG1L	tumor protein p63 regulated 1-like
SAMD12	sterile alpha motif domain containing 12
TOMM70A	translocase of outer mitochondrial membrane 70 homolog A (S. cerevisiae)
LRRC8D	leucine rich repeat containing 8 family, member D
FJX1	four jointed box 1 (Drosophila)
ARCN1	archain 1
VAX2	ventral anterior homeobox 2
AKAP2	A kinase (PRKA) anchor protein 2
GCNT2	glucosaminyl (N-acetyl) transferase 2, I-branching enzyme (I blood group)
ISM1	isthmin 1, angiogenesis inhibitor
ZFP36L1	ZFP36 ring finger protein-like 1
MEIS1	Meis homeobox 1
SDHD	succinate dehydrogenase complex, subunit D, integral membrane protein
HGSNAT	heparan-alpha-glucosaminide N-acetyltransferase
SCRT2	scratch homolog 2, zinc finger protein (Drosophila)
GAN	gigaxonin
NBR1	neighbor of BRCA1 gene 1
HAPLN1	hyaluronan and proteoglycan link protein 1
PDE4A	phosphodiesterase 4A, cAMP-specific
PALM2-AKAP2	PALM2-AKAP2 readthrough
PPP3R1	protein phosphatase 3, regulatory subunit B, alpha
EDEM1	ER degradation enhancer, mannosidase alpha-like 1
CSRNP2	cysteine-serine-rich nuclear protein 2
VAPB	VAMP (vesicle-associated membrane protein)-associated protein B and C
SYNJ2BP	synaptojanin 2 binding protein
ATF2	activating transcription factor 2
RNF217	ring finger protein 217
DEDD2	death effector domain containing 2
C10orf12	chromosome 10 open reading frame 12
ZNF48	zinc finger protein 48
DMTF1	cyclin D binding myb-like transcription factor 1
RTKN2	rhotekin 2
DCUN1D3	DCN1, defective in cullin neddylation 1, domain containing 3
ARL8B	ADP-ribosylation factor-like 8B
MAFG	v-maf avian musculoaponeurotic fibrosarcoma oncogene homolog G
AC026310.1	Protein 101060047
ZNF23	zinc finger protein 23
CHN2	chimerin 2
CCDC40	coiled-coil domain containing 40
HOXC8	homeobox C8
MORC4	MORC family CW-type zinc finger 4
CCDC120	coiled-coil domain containing 120
GDNF	glial cell derived neurotrophic factor
ARHGAP30	Rho GTPase activating protein 30
SOWAHC	sosondowah ankyrin repeat domain family member C
CCSER1	coiled-coil serine-rich protein 1
FAM175B	family with sequence similarity 175, member B
NR3C2	nuclear receptor subfamily 3, group C, member 2
CLIP4	CAP-GLY domain containing linker protein family, member 4
STX12	syntaxin 12
EBF2	early B-cell factor 2
PREB	prolactin regulatory element binding
REEP1	receptor accessory protein 1
FAM46A	family with sequence similarity 46, member A
DPYSL3	dihydropyrimidinase-like 3
TRIM41	tripartite motif containing 41
TMEM87B	transmembrane protein 87B
JARID2	jumonji, AT rich interactive domain 2
TFEC	transcription factor EC
LMOD3	leiomodin 3 (fetal)
BTBD7	BTB (POZ) domain containing 7
BMPR1A	bone morphogenetic protein receptor, type IA
AKAP1	A kinase (PRKA) anchor protein 1
INSM1	insulinoma-associated 1
NCKAP1L	NCK-associated protein 1-like
MYO10	myosin X
PRR15L	proline rich 15-like
TRAM2	translocation associated membrane protein 2
BCL2	B-cell CLL/lymphoma 2
EFNA5	ephrin-A5
MICALCL	MICAL C-terminal like
GPR50	G protein-coupled receptor 50
CHST9	carbohydrate (N-acetylgalactosamine 4-0) sulfotransferase 9
FNIP1	folliculin interacting protein 1
FAM76A	family with sequence similarity 76, member A
SPRED1	sprouty-related, EVH1 domain containing 1
AGBL4	ATP/GTP binding protein-like 4
KLF12	Kruppel-like factor 12
METAP1	methionyl aminopeptidase 1
ARHGEF33	Rho guanine nucleotide exchange factor (GEF) 33
SETBP1	SET binding protein 1
NR3C1	nuclear receptor subfamily 3, group C, member 1 (glucocorticoid receptor)
MRPL35	mitochondrial ribosomal protein L35
GRHL1	grainyhead-like 1 (Drosophila)
SLC25A24	solute carrier family 25 (mitochondrial carrier; phosphate carrier), member 24
C8orf86	chromosome 8 open reading frame 86
BCL2L2	BCL2-like 2
BCAP29	B-cell receptor-associated protein 29
ARL5A	ADP-ribosylation factor-like 5A
MAP3K3	mitogen-activated protein kinase kinase kinase 3
RUNX1T1	runt-related transcription factor 1; translocated to, 1 (cyclin D-related)
PCYT1B	phosphate cytidylyltransferase 1, choline, beta
NEK6	NIMA-related kinase 6
TAF5L	TAF5-like RNA polymerase II, p300/CBP-associated factor (PCAF)-associated factor, 65kDa
HOXA3	homeobox A3
RRM2	ribonucleotide reductase M2
NAA40	N(alpha)-acetyltransferase 40, NatD catalytic subunit
ARL4C	ADP-ribosylation factor-like 4C
PLXNA2	plexin A2
CORO1C	coronin, actin binding protein, 1C
TMED7-TICAM2	TMED7-TICAM2 readthrough
RELT	RELT tumor necrosis factor receptor
NFIC	nuclear factor I/C (CCAAT-binding transcription factor)
CPLX2	complexin 2
WWC3	WWC family member 3
CAMK2D	calcium/calmodulin-dependent protein kinase II delta
ARHGAP10	Rho GTPase activating protein 10
UBA2	ubiquitin-like modifier activating enzyme 2
CRKL	v-crk avian sarcoma virus CT10 oncogene homolog-like
MGAT3	mannosyl (beta-1,4-)-glycoprotein beta-1,4-N-acetylglucosaminyltransferase
GTPBP2	GTP binding protein 2
FBXO45	F-box protein 45
DGKG	diacylglycerol kinase, gamma 90kDa
UBP1	upstream binding protein 1 (LBP-1a)
SPOP	speckle-type POZ protein
ZADH2	zinc binding alcohol dehydrogenase domain containing 2
FBN2	fibrillin 2
YWHAZ	tyrosine 3-monooxygenase/tryptophan 5-monooxygenase activation protein, zeta polypeptide
TMEM255A	transmembrane protein 255A
FAM117B	family with sequence similarity 117, member B
DUSP6	dual specificity phosphatase 6
GMPS	guanine monphosphate synthase
TLK1	tousled-like kinase 1
TICAM2	toll-like receptor adaptor molecule 2
PCDHGA2	protocadherin gamma subfamily A, 2
SCOC	short coiled-coil protein
SGCZ	sarcoglycan, zeta
PTPRD	protein tyrosine phosphatase, receptor type, D
RREB1	ras responsive element binding protein 1
YIPF6	Yip1 domain family, member 6
ATXN1	ataxin 1
SEC61A2	Sec61 alpha 2 subunit (S. cerevisiae)
LRP12	low density lipoprotein receptor-related protein 12
GNAQ	guanine nucleotide binding protein (G protein), q polypeptide
GRIN2B	glutamate receptor, ionotropic, N-methyl D-aspartate 2B
KCND3	potassium voltage-gated channel, Shal-related subfamily, member 3
MALL	mal, T-cell differentiation protein-like
RIN3	Ras and Rab interactor 3
PPTC7	PTC7 protein phosphatase homolog (S. cerevisiae)
SEPT11	septin 11
TPPP	tubulin polymerization promoting protein
RORB	RAR-related orphan receptor B
PPP1CC	protein phosphatase 1, catalytic subunit, gamma isozyme
LRRC40	leucine rich repeat containing 40
KCNA3	potassium voltage-gated channel, shaker-related subfamily, member 3
ITPR1	inositol 1,4,5-trisphosphate receptor, type 1
RPRD2	regulation of nuclear pre-mRNA domain containing 2
FBXO9	F-box protein 9
MBNL1	muscleblind-like splicing regulator 1
DYNLL1	dynein, light chain, LC8-type 1
ARHGAP26	Rho GTPase activating protein 26
NCEH1	neutral cholesterol ester hydrolase 1
BHLHE22	basic helix-loop-helix family, member e22
BCL9	B-cell CLL/lymphoma 9
WEE1	WEE1 homolog (S. pombe)
UFD1L	ubiquitin fusion degradation 1 like (yeast)
UBE2H	ubiquitin-conjugating enzyme E2H
BCL11B	B-cell CLL/lymphoma 11B (zinc finger protein)
C20orf194	chromosome 20 open reading frame 194
FRAS1	Fraser syndrome 1
DLG5	discs, large homolog 5 (Drosophila)
POMT1	protein-O-mannosyltransferase 1
HOOK3	hook microtubule-tethering protein 3
IPO8	importin 8
KHDRBS1	KH domain containing, RNA binding, signal transduction associated 1
GABBR2	gamma-aminobutyric acid (GABA) B receptor, 2
DCAF8	DDB1- and CUL4-associated factor 8
IP6K3	inositol hexakisphosphate kinase 3
TGOLN2	trans-golgi network protein 2
PCGF3	polycomb group ring finger 3
PRKCI	protein kinase C, iota
POLR2F	polymerase (RNA) II (DNA directed) polypeptide F
ZBTB21	zinc finger and BTB domain containing 21
P2RX7	purinergic receptor P2X, ligand-gated ion channel, 7
EAF1	ELL associated factor 1
BARX2	BARX homeobox 2
UBE2J1	ubiquitin-conjugating enzyme E2, J1
GP5	glycoprotein V (platelet)
TMTC1	transmembrane and tetratricopeptide repeat containing 1
GGA2	golgi-associated, gamma adaptin ear containing, ARF binding protein 2
BNIP2	BCL2/adenovirus E1B 19kDa interacting protein 2
ANKFY1	ankyrin repeat and FYVE domain containing 1
TLR6	toll-like receptor 6
IRF2BP2	interferon regulatory factor 2 binding protein 2
ARNTL2	aryl hydrocarbon receptor nuclear translocator-like 2
GLCCI1	glucocorticoid induced transcript 1
GABRB3	gamma-aminobutyric acid (GABA) A receptor, beta 3
PPARGC1A	peroxisome proliferator-activated receptor gamma, coactivator 1 alpha
SEC24D	SEC24 family, member D (S. cerevisiae)
PALM2	paralemmin 2
ZNF282	zinc finger protein 282
SMARCA5	SWI/SNF related, matrix associated, actin dependent regulator of chromatin, subfamily a, member 5
ARHGEF26	Rho guanine nucleotide exchange factor (GEF) 26
THBS2	thrombospondin 2
ZNF699	zinc finger protein 699
FLT3	fms-related tyrosine kinase 3
BIRC6	baculoviral IAP repeat containing 6
RICTOR	RPTOR independent companion of MTOR, complex 2
ARL5B	ADP-ribosylation factor-like 5B
ZNRF3	zinc and ring finger 3
TET2	tet methylcytosine dioxygenase 2
DNAJB1	DnaJ (Hsp40) homolog, subfamily B, member 1
GET4	golgi to ER traffic protein 4 homolog (S. cerevisiae)
SNX18	sorting nexin 18
DLG1	discs, large homolog 1 (Drosophila)
MON2	MON2 homolog (S. cerevisiae)
DBH	dopamine beta-hydroxylase (dopamine beta-monooxygenase)
SATB2	SATB homeobox 2
AC068987.1	HCG1997999; cDNA FLJ33996 fis, clone DFNES2008881
INPP4A	inositol polyphosphate-4-phosphatase, type I, 107kDa
B3GNT1	UDP-GlcNAc:betaGal beta-1,3-N-acetylglucosaminyltransferase 1
MBTPS2	membrane-bound transcription factor peptidase, site 2
TGFBR1	transforming growth factor, beta receptor 1
ADAMTS5	ADAM metallopeptidase with thrombospondin type 1 motif, 5
FRMD5	FERM domain containing 5
TMEM164	transmembrane protein 164
LEPREL1	leprecan-like 1
P4HB	prolyl 4-hydroxylase, beta polypeptide
NPAS3	neuronal PAS domain protein 3
DNMBP	dynamin binding protein
GMEB1	glucocorticoid modulatory element binding protein 1
BRD4	bromodomain containing 4
FUBP3	far upstream element (FUSE) binding protein 3
ZNF335	zinc finger protein 335
DST	dystonin
PCDHGA11	protocadherin gamma subfamily A, 11
TMEM86A	transmembrane protein 86A
KIAA1324L	KIAA1324-like
PPM1K	protein phosphatase, Mg2+/Mn2+ dependent, 1K
SMIM14	small integral membrane protein 14
RAB14	RAB14, member RAS oncogene family
OPCML	opioid binding protein/cell adhesion molecule-like
SFMBT2	Scm-like with four mbt domains 2
WDFY2	WD repeat and FYVE domain containing 2
VWC2	von Willebrand factor C domain containing 2
SASH1	SAM and SH3 domain containing 1
HELZ	helicase with zinc finger
GPM6A	glycoprotein M6A
EIF1	eukaryotic translation initiation factor 1
ARAP2	ArfGAP with RhoGAP domain, ankyrin repeat and PH domain 2
ROR1	receptor tyrosine kinase-like orphan receptor 1
BRPF3	bromodomain and PHD finger containing, 3
AGO1	argonaute RISC catalytic component 1
RASSF5	Ras association (RalGDS/AF-6) domain family member 5
ELAVL4	ELAV like neuron-specific RNA binding protein 4
HSPA13	heat shock protein 70kDa family, member 13
GDF7	growth differentiation factor 7
CAPRIN1	cell cycle associated protein 1
RNF20	ring finger protein 20, E3 ubiquitin protein ligase
ARID3B	AT rich interactive domain 3B (BRIGHT-like)
FAM86C1	family with sequence similarity 86, member C1
ZNF423	zinc finger protein 423
TCF7L1	transcription factor 7-like 1 (T-cell specific, HMG-box)
SLC38A9	solute carrier family 38, member 9
XKR7	XK, Kell blood group complex subunit-related family, member 7
DENR	density-regulated protein
FAM86B1	family with sequence similarity 86, member B1
PPP6C	protein phosphatase 6, catalytic subunit
BICC1	bicaudal C homolog 1 (Drosophila)
KLHL13	kelch-like family member 13
RPS6KC1	ribosomal protein S6 kinase, 52kDa, polypeptide 1
ADAMTS9	ADAM metallopeptidase with thrombospondin type 1 motif, 9
TRIM44	tripartite motif containing 44
NRP1	neuropilin 1
CAPN14	calpain 14
PCDHGB1	protocadherin gamma subfamily B, 1
SP6	Sp6 transcription factor
PCDHGB4	protocadherin gamma subfamily B, 4
FAM83F	family with sequence similarity 83, member F
PCDHGA4	protocadherin gamma subfamily A, 4
PCDHGB3	protocadherin gamma subfamily B, 3
PCDHGB7	protocadherin gamma subfamily B, 7
PCDHGA1	protocadherin gamma subfamily A, 1
PCDHGA5	protocadherin gamma subfamily A, 5
PCDHGB2	protocadherin gamma subfamily B, 2
ZCCHC11	zinc finger, CCHC domain containing 11
DESI1	desumoylating isopeptidase 1
PCDHGA7	protocadherin gamma subfamily A, 7
PCDHGC4	protocadherin gamma subfamily C, 4
PCDHGC5	protocadherin gamma subfamily C, 5
PCDHGA10	protocadherin gamma subfamily A, 10
PCDHGB6	protocadherin gamma subfamily B, 6
PCDHGC3	protocadherin gamma subfamily C, 3
PCDHGA9	protocadherin gamma subfamily A, 9
PCDHGA12	protocadherin gamma subfamily A, 12
PCDHGA8	protocadherin gamma subfamily A, 8
PCDHGA6	protocadherin gamma subfamily A, 6
PCDHGA3	protocadherin gamma subfamily A, 3
KIAA0226	KIAA0226
EVX2	even-skipped homeobox 2
C12orf5	chromosome 12 open reading frame 5
SRPK2	SRSF protein kinase 2
ITGA11	integrin, alpha 11
LGR4	leucine-rich repeat containing G protein-coupled receptor 4
TTC28	tetratricopeptide repeat domain 28
TNFRSF8	tumor necrosis factor receptor superfamily, member 8
HDAC9	histone deacetylase 9
KLF3	Kruppel-like factor 3 (basic)
LRRC55	leucine rich repeat containing 55
ELMSAN1	ELM2 and Myb/SANT-like domain containing 1
CELSR3	cadherin, EGF LAG seven-pass G-type receptor 3
UBE2R2	ubiquitin-conjugating enzyme E2R 2
SSBP3	single stranded DNA binding protein 3
SLC17A7	solute carrier family 17 (vesicular glutamate transporter), member 7
WNK1	WNK lysine deficient protein kinase 1
SIM1	single-minded homolog 1 (Drosophila)
NOTCH2	notch 2
ZFHX4	zinc finger homeobox 4
FAM178A	family with sequence similarity 178, member A
PLAA	phospholipase A2-activating protein
NMT1	N-myristoyltransferase 1
WDFY3	WD repeat and FYVE domain containing 3
PRPF38B	pre-mRNA processing factor 38B
CASP9	caspase 9, apoptosis-related cysteine peptidase
PRDM6	PR domain containing 6
PTPRJ	protein tyrosine phosphatase, receptor type, J
MLXIP	MLX interacting protein
CSRNP3	cysteine-serine-rich nuclear protein 3
ABL2	c-abl oncogene 2, non-receptor tyrosine kinase
SCML2	sex comb on midleg-like 2 (Drosophila)
LARP4B	La ribonucleoprotein domain family, member 4B
ATP2B1	ATPase, Ca++ transporting, plasma membrane 1
SHC1	SHC (Src homology 2 domain containing) transforming protein 1
MYT1L	myelin transcription factor 1-like
IGF2BP3	insulin-like growth factor 2 mRNA binding protein 3
HNRNPA2B1	heterogeneous nuclear ribonucleoprotein A2/B1
KANSL2	KAT8 regulatory NSL complex subunit 2
TFAP2A	transcription factor AP-2 alpha (activating enhancer binding protein 2 alpha)
HSPA4L	heat shock 70kDa protein 4-like
BAZ2A	bromodomain adjacent to zinc finger domain, 2A
BLOC1S5	biogenesis of lysosomal organelles complex-1, subunit 5, muted
DCX	doublecortin
AAK1	AP2 associated kinase 1
TAOK1	TAO kinase 1
CAMK1D	calcium/calmodulin-dependent protein kinase ID
ERBB2IP	erbb2 interacting protein
CTDSPL2	CTD (carboxy-terminal domain, RNA polymerase II, polypeptide A) small phosphatase like 2
KCTD20	potassium channel tetramerization domain containing 20
AGPAT4	1-acylglycerol-3-phosphate O-acyltransferase 4
SGPL1	sphingosine-1-phosphate lyase 1
PIK3C2B	phosphatidylinositol-4-phosphate 3-kinase, catalytic subunit type 2 beta
NYAP2	neuronal tyrosine-phosphorylated phosphoinositide-3-kinase adaptor 2
NOS1AP	nitric oxide synthase 1 (neuronal) adaptor protein
EXOC6B	exocyst complex component 6B
NIPBL	Nipped-B homolog (Drosophila)
FBXO41	F-box protein 41
GRAMD4	GRAM domain containing 4
XPO4	exportin 4
PTPRG	protein tyrosine phosphatase, receptor type, G
NRARP	NOTCH-regulated ankyrin repeat protein
SLC4A4	solute carrier family 4 (sodium bicarbonate cotransporter), member 4
LRP2	low density lipoprotein receptor-related protein 2
ZNF462	zinc finger protein 462
TANC2	tetratricopeptide repeat, ankyrin repeat and coiled-coil containing 2
NFATC3	nuclear factor of activated T-cells, cytoplasmic, calcineurin-dependent 3
ROBO1	roundabout, axon guidance receptor, homolog 1 (Drosophila)
APPL1	adaptor protein, phosphotyrosine interaction, PH domain and leucine zipper containing 1
RSRC2	arginine/serine-rich coiled-coil 2
NAV1	neuron navigator 1
TUB	tubby bipartite transcription factor
SLC25A21	solute carrier family 25 (mitochondrial oxoadipate carrier), member 21
PTGFRN	prostaglandin F2 receptor inhibitor
ABCA1	ATP-binding cassette, sub-family A (ABC1), member 1
MTMR6	myotubularin related protein 6
TGFBRAP1	transforming growth factor, beta receptor associated protein 1
SLC5A1	solute carrier family 5 (sodium/glucose cotransporter), member 1
PHF19	PHD finger protein 19
LIPH	lipase, member H
KREMEN1	kringle containing transmembrane protein 1
ATXN7L1	ataxin 7-like 1
NFIA	nuclear factor I/A
TBX20	T-box 20
UNC5B	unc-5 homolog B (C. elegans)
MCC	mutated in colorectal cancers
LRRC8A	leucine rich repeat containing 8 family, member A
ZEB1	zinc finger E-box binding homeobox 1
SLC39A14	solute carrier family 39 (zinc transporter), member 14
MIER3	mesoderm induction early response 1, family member 3
ZC3H4	zinc finger CCCH-type containing 4
TRIM24	tripartite motif containing 24
RP11-796G6.2	Uncharacterized protein
ZNF148	zinc finger protein 148
ZFP62	ZFP62 zinc finger protein
MBD1	methyl-CpG binding domain protein 1
TRPS1	trichorhinophalangeal syndrome I
DYNC1LI2	dynein, cytoplasmic 1, light intermediate chain 2
FARP1	FERM, RhoGEF (ARHGEF) and pleckstrin domain protein 1 (chondrocyte-derived)
FUT11	fucosyltransferase 11 (alpha (1,3) fucosyltransferase)
SORT1	sortilin 1
FAM86A	family with sequence similarity 86, member A
FANCB	Fanconi anemia, complementation group B
GAPVD1	GTPase activating protein and VPS9 domains 1
CTH	cystathionase (cystathionine gamma-lyase)
SOCS7	suppressor of cytokine signaling 7
RANBP2	RAN binding protein 2
BCL9L	B-cell CLL/lymphoma 9-like
ARRB1	arrestin, beta 1
CLCN5	chloride channel, voltage-sensitive 5
FAM107B	family with sequence similarity 107, member B
IRF6	interferon regulatory factor 6
AP5M1	adaptor-related protein complex 5, mu 1 subunit
TRIM71	tripartite motif containing 71, E3 ubiquitin protein ligase
ETV1	ets variant 1
ERGIC1	endoplasmic reticulum-golgi intermediate compartment (ERGIC) 1
AGAP2	ArfGAP with GTPase domain, ankyrin repeat and PH domain 2
TRPC5	transient receptor potential cation channel, subfamily C, member 5
ESR1	estrogen receptor 1
PHLPP2	PH domain and leucine rich repeat protein phosphatase 2
RABGAP1L	RAB GTPase activating protein 1-like
ELMOD3	ELMO/CED-12 domain containing 3
ZNRF1	zinc and ring finger 1, E3 ubiquitin protein ligase
LRRC58	leucine rich repeat containing 58
DDX18	DEAD (Asp-Glu-Ala-Asp) box polypeptide 18
MAP1B	microtubule-associated protein 1B
BZW1	basic leucine zipper and W2 domains 1
RBM7	RNA binding motif protein 7
WIPF2	WAS/WASL interacting protein family, member 2
TPD52	tumor protein D52
CDH6	cadherin 6, type 2, K-cadherin (fetal kidney)
CDX2	caudal type homeobox 2
CYP27B1	cytochrome P450, family 27, subfamily B, polypeptide 1
ADARB2	adenosine deaminase, RNA-specific, B2 (non-functional)
SDHAF1	succinate dehydrogenase complex assembly factor 1
TMBIM6	transmembrane BAX inhibitor motif containing 6
RBM24	RNA binding motif protein 24
GPRC5B	G protein-coupled receptor, family C, group 5, member B
SLC43A2	solute carrier family 43 (amino acid system L transporter), member 2
GRAMD1B	GRAM domain containing 1B
MYO18A	myosin XVIIIA
NABP1	nucleic acid binding protein 1
LNPEP	leucyl/cystinyl aminopeptidase
G3BP1	GTPase activating protein (SH3 domain) binding protein 1
PTGIS	prostaglandin I2 (prostacyclin) synthase
NXF1	nuclear RNA export factor 1
HAUS5	HAUS augmin-like complex, subunit 5
MED14	mediator complex subunit 14
FKBP15	FK506 binding protein 15, 133kDa
CUL4B	cullin 4B
DNAL1	dynein, axonemal, light chain 1
ARHGAP29	Rho GTPase activating protein 29
RERE	arginine-glutamic acid dipeptide (RE) repeats
NFAT5	nuclear factor of activated T-cells 5, tonicity-responsive
MSL2	male-specific lethal 2 homolog (Drosophila)
ANXA11	annexin A11
CCPG1	cell cycle progression 1
LRRC8C	leucine rich repeat containing 8 family, member C
IGSF3	immunoglobulin superfamily, member 3
ISL2	ISL LIM homeobox 2
GTDC1	glycosyltransferase-like domain containing 1
NKRF	NFKB repressing factor
PLEKHG3	pleckstrin homology domain containing, family G (with RhoGef domain) member 3
CCDC59	coiled-coil domain containing 59
ATG7	autophagy related 7
NGDN	neuroguidin, EIF4E binding protein
PIP4K2B	phosphatidylinositol-5-phosphate 4-kinase, type II, beta
PIGV	phosphatidylinositol glycan anchor biosynthesis, class V
SEC31B	SEC31 homolog B (S. cerevisiae)
SOX14	SRY (sex determining region Y)-box 14
ANKH	ANKH inorganic pyrophosphate transport regulator
SCO1	SCO1 cytochrome c oxidase assembly protein
AHSA2	AHA1, activator of heat shock 90kDa protein ATPase homolog 2 (yeast)
ZBTB20	zinc finger and BTB domain containing 20
DCC	deleted in colorectal carcinoma
AIP	aryl hydrocarbon receptor interacting protein
DDI2	DNA-damage inducible 1 homolog 2 (S. cerevisiae)
ABHD16B	abhydrolase domain containing 16B
IL1RAPL1	interleukin 1 receptor accessory protein-like 1
CD180	CD180 molecule
GATSL2	GATS protein-like 2
TG	thyroglobulin
FHL5	four and a half LIM domains 5
SMAD6	SMAD family member 6
SPCS1	signal peptidase complex subunit 1 homolog (S. cerevisiae)
KCNK5	potassium channel, subfamily K, member 5
CIRH1A	cirrhosis, autosomal recessive 1A (cirhin)
PRR11	proline rich 11
CPE	carboxypeptidase E
KCNC2	potassium voltage-gated channel, Shaw-related subfamily, member 2

## Sheet: (C.) mml-miR-133d-3p
mml-miR-133d-3p Predicted Target Genes	Full Gene Name	mRNAs Evaluated
MUC19	mucin 19, oligomeric	AIMP1
HRK	harakiri, BCL2 interacting protein (contains only BH3 domain)	BMP2
ZCCHC24	zinc finger, CCHC domain containing 24	CCL1
SOX1	SRY (sex determining region Y)-box 1	CCL11
CACNG8	calcium channel, voltage-dependent, gamma subunit 8	CCL13
GAS1	growth arrest-specific 1	CCL17
SIGLEC7	sialic acid binding Ig-like lectin 7	CCL2
CEACAM19	carcinoembryonic antigen-related cell adhesion molecule 19	CCL20
PPP3R2	protein phosphatase 3, regulatory subunit B, beta	CCL23
C7orf69	chromosome 7 open reading frame 69	CCL5
AC093802.1	Uncharacterized protein	CCR1
C1orf216	chromosome 1 open reading frame 216	CCR3
MYL10	myosin, light chain 10, regulatory	CCR4
AC079354.1	uncharacterized protein KIAA2012	CCR6
AL359878.1	Uncharacterized protein	CCR8
SYT2	synaptotagmin II	CD40LG
MRPS18A	mitochondrial ribosomal protein S18A	CD70
C7orf72	chromosome 7 open reading frame 72	CSF1
TMBIM1	transmembrane BAX inhibitor motif containing 1	CSF2
RABEPK	Rab9 effector protein with kelch motifs	CX3CL1
RNF43	ring finger protein 43	CX3CR1
ZNF300	zinc finger protein 300	CXCL11
OLAH	oleoyl-ACP hydrolase	CXCL12
SLAMF8	SLAM family member 8	CXCL13
TSSC4	tumor suppressing subtransferable candidate 4	CXCL6
CXCR5	chemokine (C-X-C motif) receptor 5	CXCL9
TMEM151B	transmembrane protein 151B	CXCR1
FAM27E1	family with sequence similarity 27, member E1	CXCR4
FAM27E2	family with sequence similarity 27, member E2	FASLG
FAM27E3	family with sequence similarity 27, member E3	IFNA2
FBXO24	F-box protein 24	IFNG
FETUB	fetuin B	IL10RA
ASB6	ankyrin repeat and SOCS box containing 6	IL10RB
RP11-144F15.1	Uncharacterized protein	IL11RA
EIF1AD	eukaryotic translation initiation factor 1A domain containing	IL12B
PATE4	prostate and testis expressed 4	IL12RB1
SLC39A1	solute carrier family 39 (zinc transporter), member 1	IL12RB2
MGAT1	mannosyl (alpha-1,3-)-glycoprotein beta-1,2-N-acetylglucosaminyltransferase	IL13
EYA2	eyes absent homolog 2 (Drosophila)	IL15
C7orf65	chromosome 7 open reading frame 65	IL15RA
RWDD2B	RWD domain containing 2B	IL16
WDR25	WD repeat domain 25	IL17A
ZNF792	zinc finger protein 792	IL17F
AGPAT4	1-acylglycerol-3-phosphate O-acyltransferase 4	IL1A
TRABD	TraB domain containing	IL1B
SCGN	secretagogin, EF-hand calcium binding protein	IL1R1
NEUROD6	neuronal differentiation 6	IL1R2
MYOM3	myomesin 3	IL1RN
PELI3	pellino E3 ubiquitin protein ligase family member 3	IL2
KY	kyphoscoliosis peptidase	IL20
REPIN1	replication initiator 1	IL21
RGMA	RGM domain family, member A	IL2RA
NCR1	natural cytotoxicity triggering receptor 1	IL2RB
GJD3	gap junction protein, delta 3, 31.9kDa	IL2RG
CCRL2	chemokine (C-C motif) receptor-like 2	IL3
ZNF503	zinc finger protein 503	IL4
SORT1	sortilin 1	IL5
SC5D	sterol-C5-desaturase	IL5RA
METTL21A	methyltransferase like 21A	IL6
IL13RA1	interleukin 13 receptor, alpha 1	IL6R
CD180	CD180 molecule	IL7
MOG	myelin oligodendrocyte glycoprotein	CXCL8
DNAJB7	DnaJ (Hsp40) homolog, subfamily B, member 7	CXCR2
PRADC1	protease-associated domain containing 1	IL9R
SNX8	sorting nexin 8	IL13RA2
ZNF692	zinc finger protein 692	LOC710618
RAB39B	RAB39B, member RAS oncogene family	IL9
CBR1	carbonyl reductase 1	CCL7
TMEM81	transmembrane protein 81	CCL26
FLJ27365	hsa-mir-4763	LTA
VEGFB	vascular endothelial growth factor B	MIF
TMCO4	transmembrane and coiled-coil domains 4	NAMPT
RP11-352D3.2	Uncharacterized protein	OSM
AC135983.2	Protein LOC100996413	PF4
TMEM221	transmembrane protein 221	SPP1
C2orf88	chromosome 2 open reading frame 88	TNF
FAM83F	family with sequence similarity 83, member F	TNFRSF11B
RCE1	RCE1 homolog, prenyl protein protease (S. cerevisiae)	TNFSF10
SLC11A1	solute carrier family 11 (proton-coupled divalent metal ion transporter), member 1	TNFSF11
FAM132B	family with sequence similarity 132, member B	TNFSF13B
CXorf36	chromosome X open reading frame 36	TNFSF14
EPB42	erythrocyte membrane protein band 4.2	TNFSF4
AQP6	aquaporin 6, kidney specific	VEGFA
NEK6	NIMA-related kinase 6	XCL1
C21orf49	chromosome 21 open reading frame 49	NFKBIA
OSCAR	osteoclast associated, immunoglobulin-like receptor	CD36
TFRC	transferrin receptor	STAT1
GRASP	GRP1 (general receptor for phosphoinositides 1)-associated scaffold protein	MAFB
ANKRD66	ankyrin repeat domain 66
COL17A1	collagen, type XVII, alpha 1
IL20RB	interleukin 20 receptor beta
TM4SF1	transmembrane 4 L six family member 1
FOXG1	forkhead box G1
PGPEP1	pyroglutamyl-peptidase I
H3F3A	H3 histone, family 3A
C1RL	complement component 1, r subcomponent-like
PHF20	PHD finger protein 20
ENTPD5	ectonucleoside triphosphate diphosphohydrolase 5
SPARC	secreted protein, acidic, cysteine-rich (osteonectin)
FADS1	fatty acid desaturase 1
RP11-113D6.10	Putative mitochondrial carrier protein LOC494141
HEATR5A	HEAT repeat containing 5A
LRRC25	leucine rich repeat containing 25
NAT14	N-acetyltransferase 14 (GCN5-related, putative)
SPAG7	sperm associated antigen 7
CD99L2	CD99 molecule-like 2
DSTYK	dual serine/threonine and tyrosine protein kinase
SPOCD1	SPOC domain containing 1
GNAT1	guanine nucleotide binding protein (G protein), alpha transducing activity polypeptide 1
FGD2	FYVE, RhoGEF and PH domain containing 2
CES4A	carboxylesterase 4A
MBL2	mannose-binding lectin (protein C) 2, soluble
APOL4	apolipoprotein L, 4
HOXC12	homeobox C12
STK32C	serine/threonine kinase 32C
TLE2	transducin-like enhancer of split 2 (E(sp1) homolog, Drosophila)
ZSCAN30	zinc finger and SCAN domain containing 30
ZFAND2B	zinc finger, AN1-type domain 2B
RANBP3L	RAN binding protein 3-like
AIRE	autoimmune regulator
ARTN	artemin
SEMA6B	sema domain, transmembrane domain (TM), and cytoplasmic domain, (semaphorin) 6B
DHFRL1	dihydrofolate reductase-like 1
ZNF343	zinc finger protein 343
FLVCR1	feline leukemia virus subgroup C cellular receptor 1
GJB1	gap junction protein, beta 1, 32kDa
QSOX2	quiescin Q6 sulfhydryl oxidase 2
RP11-293M10.1	Uncharacterized protein
MEA1	male-enhanced antigen 1
FHL3	four and a half LIM domains 3
TTLL11	tubulin tyrosine ligase-like family, member 11
DDX6	DEAD (Asp-Glu-Ala-Asp) box helicase 6
ZFP36L1	ZFP36 ring finger protein-like 1
C4orf33	chromosome 4 open reading frame 33
SET	SET nuclear oncogene
ADAMTS13	ADAM metallopeptidase with thrombospondin type 1 motif, 13
UXS1	UDP-glucuronate decarboxylase 1
ZNF784	zinc finger protein 784
CTC1	CTS telomere maintenance complex component 1
AL590822.1	Uncharacterized protein
CRX	cone-rod homeobox
TIMM44	translocase of inner mitochondrial membrane 44 homolog (yeast)
AADACL4	arylacetamide deacetylase-like 4
C10orf85	chromosome 10 open reading frame 85
TRABD2A	TraB domain containing 2A
WNT10B	wingless-type MMTV integration site family, member 10B
ARPC4	actin related protein 2/3 complex, subunit 4, 20kDa
TECRL	trans-2,3-enoyl-CoA reductase-like
DCPS	decapping enzyme, scavenger
GPER1	G protein-coupled estrogen receptor 1
GALNT9	UDP-N-acetyl-alpha-D-galactosamine:polypeptide N-acetylgalactosaminyltransferase 9 (GalNAc-T9)
BAX	BCL2-associated X protein
PRX	periaxin
BTN2A2	butyrophilin, subfamily 2, member A2
DUSP14	dual specificity phosphatase 14
TEX261	testis expressed 261
FUT7	fucosyltransferase 7 (alpha (1,3) fucosyltransferase)
ARHGEF16	Rho guanine nucleotide exchange factor (GEF) 16
VMA21	VMA21 vacuolar H+-ATPase homolog (S. cerevisiae)
NLRP13	NLR family, pyrin domain containing 13
NBPF6	neuroblastoma breakpoint family, member 6
SOX12	SRY (sex determining region Y)-box 12
AC023632.1	HCG2009141; PRO2397; Uncharacterized protein
FAM216B	family with sequence similarity 216, member B
C15orf27	chromosome 15 open reading frame 27
SMAGP	small cell adhesion glycoprotein
PBX2	pre-B-cell leukemia homeobox 2
AP000322.53
TESPA1	thymocyte expressed, positive selection associated 1
LBH	limb bud and heart development
SLC25A18	solute carrier family 25 (glutamate carrier), member 18
SYT15	synaptotagmin XV
AGXT	alanine-glyoxylate aminotransferase
ETNK2	ethanolamine kinase 2
NLRC5	NLR family, CARD domain containing 5
SH3GL3	SH3-domain GRB2-like 3
CCDC107	coiled-coil domain containing 107
NKX6-3	NK6 homeobox 3
FAM26D	family with sequence similarity 26, member D
IL13	interleukin 13
SHQ1	SHQ1, H/ACA ribonucleoprotein assembly factor
FAM211B	family with sequence similarity 211, member B
AGBL4	ATP/GTP binding protein-like 4
PEAR1	platelet endothelial aggregation receptor 1
TMPRSS6	transmembrane protease, serine 6
MLNR	motilin receptor
GIGYF1	GRB10 interacting GYF protein 1
NFAM1	NFAT activating protein with ITAM motif 1
CLDN12	claudin 12
WDR44	WD repeat domain 44
MAPK8IP2	mitogen-activated protein kinase 8 interacting protein 2
MTMR1	myotubularin related protein 1
GGT7	gamma-glutamyltransferase 7
PADI3	peptidyl arginine deiminase, type III
TRNP1	TMF1-regulated nuclear protein 1
KIAA0040	KIAA0040
LRFN4	leucine rich repeat and fibronectin type III domain containing 4
CYB561D2	cytochrome b561 family, member D2
IMPG1	interphotoreceptor matrix proteoglycan 1
MCFD2	multiple coagulation factor deficiency 2
QDPR	quinoid dihydropteridine reductase
CCL22	chemokine (C-C motif) ligand 22
PAQR4	progestin and adipoQ receptor family member IV
FERMT1	fermitin family member 1
C12orf43	chromosome 12 open reading frame 43
CTSG	cathepsin G
JPH3	junctophilin 3
MS4A15	membrane-spanning 4-domains, subfamily A, member 15
C14orf180	chromosome 14 open reading frame 180
C21orf62	chromosome 21 open reading frame 62
KCNIP2	Kv channel interacting protein 2
FAM189A1	family with sequence similarity 189, member A1
SASH3	SAM and SH3 domain containing 3
AC068987.1	HCG1997999; cDNA FLJ33996 fis, clone DFNES2008881
DBNDD1	dysbindin (dystrobrevin binding protein 1) domain containing 1
RBM22	RNA binding motif protein 22
PNMA2	paraneoplastic Ma antigen 2
PCDH1	protocadherin 1
FOXO4	forkhead box O4
ZNF41	zinc finger protein 41
CABP7	calcium binding protein 7
TNFRSF10D	tumor necrosis factor receptor superfamily, member 10d, decoy with truncated death domain
FIBCD1	fibrinogen C domain containing 1
FAM98C	family with sequence similarity 98, member C
TTLL5	tubulin tyrosine ligase-like family, member 5
KRTAP4-5	keratin associated protein 4-5
SHC4	SHC (Src homology 2 domain containing) family, member 4
SMCO3	single-pass membrane protein with coiled-coil domains 3
MYD88	myeloid differentiation primary response 88
SV2B	synaptic vesicle glycoprotein 2B
ESR1	estrogen receptor 1
EPM2A	epilepsy, progressive myoclonus type 2A, Lafora disease (laforin)
ATP2B4	ATPase, Ca++ transporting, plasma membrane 4
CHRM2	cholinergic receptor, muscarinic 2
CHP2	calcineurin-like EF-hand protein 2
MS4A1	membrane-spanning 4-domains, subfamily A, member 1
PCBD2	pterin-4 alpha-carbinolamine dehydratase/dimerization cofactor of hepatocyte nuclear factor 1 alpha (TCF1) 2
C6orf195	chromosome 6 open reading frame 195
TYW1	tRNA-yW synthesizing protein 1 homolog (S. cerevisiae)
C1QTNF5	C1q and tumor necrosis factor related protein 5
RFX2	regulatory factor X, 2 (influences HLA class II expression)
DOK6	docking protein 6
ARG2	arginase 2
PIF1	PIF1 5'-to-3' DNA helicase
C12orf68	chromosome 12 open reading frame 68
LRIT2	leucine-rich repeat, immunoglobulin-like and transmembrane domains 2
WDFY1	WD repeat and FYVE domain containing 1
APBA1	amyloid beta (A4) precursor protein-binding, family A, member 1
C15orf40	chromosome 15 open reading frame 40
VRTN	vertebrae development associated
C9orf24	chromosome 9 open reading frame 24
COL26A1	collagen, type XXVI, alpha 1
TMEM184A	transmembrane protein 184A
NCF2	neutrophil cytosolic factor 2
APIP	APAF1 interacting protein
C2orf54	chromosome 2 open reading frame 54
STC2	stanniocalcin 2
POU2F3	POU class 2 homeobox 3
CMKLR1	chemokine-like receptor 1
EME2	essential meiotic structure-specific endonuclease subunit 2
CPEB1	cytoplasmic polyadenylation element binding protein 1
FAM153A	family with sequence similarity 153, member A
SLC25A29	solute carrier family 25 (mitochondrial carnitine/acylcarnitine carrier), member 29
EMID1	EMI domain containing 1
SRCIN1	SRC kinase signaling inhibitor 1
SLMAP	sarcolemma associated protein
BTN2A1	butyrophilin, subfamily 2, member A1
HK2	hexokinase 2
DIAPH1	diaphanous-related formin 1
XKRX	XK, Kell blood group complex subunit-related, X-linked
FITM2	fat storage-inducing transmembrane protein 2
ELOF1	elongation factor 1 homolog (S. cerevisiae)
DENND1A	DENN/MADD domain containing 1A
SLC2A4	solute carrier family 2 (facilitated glucose transporter), member 4
ASAH2C	N-acylsphingosine amidohydrolase (non-lysosomal ceramidase) 2C
CNR2	cannabinoid receptor 2 (macrophage)
MDGA1	MAM domain containing glycosylphosphatidylinositol anchor 1
PAX6	paired box 6
DSCR3	Down syndrome critical region gene 3
C6orf123	chromosome 6 open reading frame 123
EBF3	early B-cell factor 3
MAGED2	melanoma antigen family D, 2
PRKRIP1	PRKR interacting protein 1 (IL11 inducible)
LYNX1	Ly6/neurotoxin 1
PTRF	polymerase I and transcript release factor
AMZ1	archaelysin family metallopeptidase 1
CYB561	cytochrome b561
NMRAL1	NmrA-like family domain containing 1
SPINK7	serine peptidase inhibitor, Kazal type 7 (putative)
POMT1	protein-O-mannosyltransferase 1
C2CD5	C2 calcium-dependent domain containing 5
APBA2	amyloid beta (A4) precursor protein-binding, family A, member 2
ARRB2	arrestin, beta 2
BRINP2	bone morphogenetic protein/retinoic acid inducible neural-specific 2
MFSD2B	major facilitator superfamily domain containing 2B
TMEM25	transmembrane protein 25
FOSL2	FOS-like antigen 2
TMEM207	transmembrane protein 207
MATN3	matrilin 3
TAF5	TAF5 RNA polymerase II, TATA box binding protein (TBP)-associated factor, 100kDa
SAPCD2	suppressor APC domain containing 2
XG	Xg blood group
POP4	processing of precursor 4, ribonuclease P/MRP subunit (S. cerevisiae)
KIAA1143	KIAA1143
SLC25A51	solute carrier family 25, member 51
BCL2L13	BCL2-like 13 (apoptosis facilitator)
ARPC1B	actin related protein 2/3 complex, subunit 1B, 41kDa
TOP2A	topoisomerase (DNA) II alpha 170kDa
ABRACL	ABRA C-terminal like
PAK6	p21 protein (Cdc42/Rac)-activated kinase 6
PRIM2	primase, DNA, polypeptide 2 (58kDa)
RLF	rearranged L-myc fusion
ANAPC11	anaphase promoting complex subunit 11
TBC1D10B	TBC1 domain family, member 10B
BHLHA15	basic helix-loop-helix family, member a15
PAX8	paired box 8
AC110619.2	Uncharacterized protein
SOCS5	suppressor of cytokine signaling 5
MYO1E	myosin IE
TAL1	T-cell acute lymphocytic leukemia 1
ANGPTL6	angiopoietin-like 6
MORC2	MORC family CW-type zinc finger 2
C11orf44	chromosome 11 open reading frame 44
TACR2	tachykinin receptor 2
OR52W1	olfactory receptor, family 52, subfamily W, member 1
FAM60A	family with sequence similarity 60, member A
AMMECR1	Alport syndrome, mental retardation, midface hypoplasia and elliptocytosis chromosomal region gene 1
TPD52	tumor protein D52
RBM8A	RNA binding motif protein 8A
CNNM4	cyclin M4
LARP1	La ribonucleoprotein domain family, member 1
PRAF2	PRA1 domain family, member 2
DDA1	DET1 and DDB1 associated 1
NDNF	neuron-derived neurotrophic factor
BTBD2	BTB (POZ) domain containing 2
GYPA	glycophorin A (MNS blood group)
RBAK-RBAKDN	RBAK-RBAKDN readthrough
CHFR	checkpoint with forkhead and ring finger domains, E3 ubiquitin protein ligase
ZNF606	zinc finger protein 606
CBY1	chibby homolog 1 (Drosophila)
SLC41A1	solute carrier family 41 (magnesium transporter), member 1
CARD11	caspase recruitment domain family, member 11
STYK1	serine/threonine/tyrosine kinase 1
HR	hair growth associated
LINGO4	leucine rich repeat and Ig domain containing 4
RORC	RAR-related orphan receptor C
C1orf167	chromosome 1 open reading frame 167
LMAN2L	lectin, mannose-binding 2-like
SNX21	sorting nexin family member 21
RP11-429E11.3	Uncharacterized protein
LPL	lipoprotein lipase
THRA	thyroid hormone receptor, alpha
GIMAP1	GTPase, IMAP family member 1
LAT2	linker for activation of T cells family, member 2
CCR10	chemokine (C-C motif) receptor 10
ZBTB47	zinc finger and BTB domain containing 47
LURAP1	leucine rich adaptor protein 1
KCNK13	potassium channel, subfamily K, member 13
SP6	Sp6 transcription factor
NCS1	neuronal calcium sensor 1
ZNF436	zinc finger protein 436
IARS	isoleucyl-tRNA synthetase
IGF2BP1	insulin-like growth factor 2 mRNA binding protein 1
TRAK1	trafficking protein, kinesin binding 1
PIWIL2	piwi-like RNA-mediated gene silencing 2
MS4A14	membrane-spanning 4-domains, subfamily A, member 14
SLC28A1	solute carrier family 28 (concentrative nucleoside transporter), member 1
KANSL3	KAT8 regulatory NSL complex subunit 3
LRRC7	leucine rich repeat containing 7
HAP1	huntingtin-associated protein 1
PKDCC	protein kinase domain containing, cytoplasmic
RAPGEF3	Rap guanine nucleotide exchange factor (GEF) 3
SYT11	synaptotagmin XI
WISP2	WNT1 inducible signaling pathway protein 2
SYNGR1	synaptogyrin 1
SHISA6	shisa family member 6
DPEP1	dipeptidase 1 (renal)
RDH8	retinol dehydrogenase 8 (all-trans)
CMAS	cytidine monophosphate N-acetylneuraminic acid synthetase
KDELR1	KDEL (Lys-Asp-Glu-Leu) endoplasmic reticulum protein retention receptor 1
ZNF142	zinc finger protein 142
ANP32A	acidic (leucine-rich) nuclear phosphoprotein 32 family, member A
CDK9	cyclin-dependent kinase 9
MPI	mannose phosphate isomerase
TSEN34	TSEN34 tRNA splicing endonuclease subunit
SYP	synaptophysin
RBMXL1	RNA binding motif protein, X-linked-like 1
ADAM33	ADAM metallopeptidase domain 33
KIF24	kinesin family member 24
HMGA2	high mobility group AT-hook 2
PMP2	peripheral myelin protein 2
FZD4	frizzled family receptor 4
TLL1	tolloid-like 1
NSG2	Neuron-specific protein family member 2
LRRC55	leucine rich repeat containing 55
MLST8	MTOR associated protein, LST8 homolog (S. cerevisiae)
TIMP3	TIMP metallopeptidase inhibitor 3
CREBL2	cAMP responsive element binding protein-like 2
C16orf90	chromosome 16 open reading frame 90
FAM167A	family with sequence similarity 167, member A
CCDC19	coiled-coil domain containing 19
CLN6	ceroid-lipofuscinosis, neuronal 6, late infantile, variant
APOA5	apolipoprotein A-V
PSMD3	proteasome (prosome, macropain) 26S subunit, non-ATPase, 3
SHISA3	shisa family member 3
MBD3	methyl-CpG binding domain protein 3
C11orf82	chromosome 11 open reading frame 82
LHFPL2	lipoma HMGIC fusion partner-like 2
U2AF2	U2 small nuclear RNA auxiliary factor 2
RXFP2	relaxin/insulin-like family peptide receptor 2
SLC39A12	solute carrier family 39 (zinc transporter), member 12
NR5A1	nuclear receptor subfamily 5, group A, member 1
SBSN	suprabasin
RAMP1	receptor (G protein-coupled) activity modifying protein 1
MAX	MYC associated factor X
ZNF74	zinc finger protein 74
KIAA0087	KIAA0087
CCDC176	coiled-coil domain containing 176
USP2	ubiquitin specific peptidase 2
FBXO31	F-box protein 31
CKAP4	cytoskeleton-associated protein 4
TBCEL	tubulin folding cofactor E-like
ZNF71	zinc finger protein 71
WSCD2	WSC domain containing 2
FAM43B	family with sequence similarity 43, member B
CELF5	CUGBP, Elav-like family member 5
PLIN3	perilipin 3
FBXO45	F-box protein 45
FKBP10	FK506 binding protein 10, 65 kDa
MEIS1	Meis homeobox 1
GPLD1	glycosylphosphatidylinositol specific phospholipase D1
SGCD	sarcoglycan, delta (35kDa dystrophin-associated glycoprotein)
HMGA1	high mobility group AT-hook 1
CBLN2	cerebellin 2 precursor
B3GALT5	UDP-Gal:betaGlcNAc beta 1,3-galactosyltransferase, polypeptide 5
P4HA3	prolyl 4-hydroxylase, alpha polypeptide III
FAM212A	family with sequence similarity 212, member A
MSX2	msh homeobox 2
SLCO3A1	solute carrier organic anion transporter family, member 3A1
POU2F2	POU class 2 homeobox 2
SLC45A1	solute carrier family 45, member 1
C9orf163	chromosome 9 open reading frame 163
ISCA1	iron-sulfur cluster assembly 1
MAGEH1	melanoma antigen family H, 1
PATE1	prostate and testis expressed 1
CAMK2B	calcium/calmodulin-dependent protein kinase II beta
WDR45	WD repeat domain 45
AF196779.12	Uncharacterized protein; WD repeat domain phosphoinositide-interacting protein 4
XRCC3	X-ray repair complementing defective repair in Chinese hamster cells 3
GMEB2	glucocorticoid modulatory element binding protein 2
FOSB	FBJ murine osteosarcoma viral oncogene homolog B
CCDC88B	coiled-coil domain containing 88B
LCP1	lymphocyte cytosolic protein 1 (L-plastin)
C5orf20	chromosome 5 open reading frame 20
SEC61A1	Sec61 alpha 1 subunit (S. cerevisiae)
NEK7	NIMA-related kinase 7
HSD3B7	hydroxy-delta-5-steroid dehydrogenase, 3 beta- and steroid delta-isomerase 7
MANBAL	mannosidase, beta A, lysosomal-like
RHOBTB2	Rho-related BTB domain containing 2
ANKRD65	ankyrin repeat domain 65
GP5	glycoprotein V (platelet)
TMIE	transmembrane inner ear
TRIB3	tribbles pseudokinase 3
ITPRIP	inositol 1,4,5-trisphosphate receptor interacting protein
IRAK1	interleukin-1 receptor-associated kinase 1
RANBP9	RAN binding protein 9
BST2	bone marrow stromal cell antigen 2
CCNI2	cyclin I family, member 2
SHISA4	shisa family member 4
KCNMB1	potassium large conductance calcium-activated channel, subfamily M, beta member 1
ALKBH5	alkB, alkylation repair homolog 5 (E. coli)
STX3	syntaxin 3
ARHGAP22	Rho GTPase activating protein 22
INO80E	INO80 complex subunit E
SIX5	SIX homeobox 5
GPA33	glycoprotein A33 (transmembrane)
C1orf43	chromosome 1 open reading frame 43
PFKFB3	6-phosphofructo-2-kinase/fructose-2,6-biphosphatase 3
EBF2	early B-cell factor 2
FAM83H	family with sequence similarity 83, member H
KLHL29	kelch-like family member 29
CTAGE1	cutaneous T-cell lymphoma-associated antigen 1
NR4A2	nuclear receptor subfamily 4, group A, member 2
RBM20	RNA binding motif protein 20
GSTM4	glutathione S-transferase mu 4
PHF21B	PHD finger protein 21B
PRPF19	pre-mRNA processing factor 19
CD276	CD276 molecule
SGPP2	sphingosine-1-phosphate phosphatase 2
NCF4	neutrophil cytosolic factor 4, 40kDa
MFSD11	major facilitator superfamily domain containing 11
CENPO	centromere protein O
CERS2	ceramide synthase 2
KCNE3	potassium voltage-gated channel, Isk-related family, member 3
MT1E	metallothionein 1E
CLDN11	claudin 11
TNFSF15	tumor necrosis factor (ligand) superfamily, member 15
NEGR1	neuronal growth regulator 1
HSPA6	heat shock 70kDa protein 6 (HSP70B')
AL355390.1	Uncharacterized protein
SLC29A1	solute carrier family 29 (equilibrative nucleoside transporter), member 1
RNF34	ring finger protein 34, E3 ubiquitin protein ligase
C2orf50	chromosome 2 open reading frame 50
ANKH	ANKH inorganic pyrophosphate transport regulator
FAM89A	family with sequence similarity 89, member A
GAREML	GRB2 associated, regulator of MAPK1-like
SSTR5	somatostatin receptor 5
NTRK1	neurotrophic tyrosine kinase, receptor, type 1
CRB1	crumbs homolog 1 (Drosophila)
IFFO2	intermediate filament family orphan 2
TSC22D3	TSC22 domain family, member 3
F2RL1	coagulation factor II (thrombin) receptor-like 1
CADM2	cell adhesion molecule 2
GSTM5	glutathione S-transferase mu 5
UBE2L6	ubiquitin-conjugating enzyme E2L 6
SLC22A13	solute carrier family 22 (organic anion/urate transporter), member 13
NOC2L	nucleolar complex associated 2 homolog (S. cerevisiae)
AP001579.1	Uncharacterized protein
ARRDC2	arrestin domain containing 2
DEFB107A	defensin, beta 107A
TSPYL6	TSPY-like 6
LRFN3	leucine rich repeat and fibronectin type III domain containing 3
GJA3	gap junction protein, alpha 3, 46kDa
KAT5	K(lysine) acetyltransferase 5
DEFB107B	defensin, beta 107B
COLGALT2	collagen beta(1-O)galactosyltransferase 2
MFSD12	major facilitator superfamily domain containing 12
HEG1	heart development protein with EGF-like domains 1
CYC1	cytochrome c-1
LMX1B	LIM homeobox transcription factor 1, beta
PLOD3	procollagen-lysine, 2-oxoglutarate 5-dioxygenase 3
TBC1D1	TBC1 (tre-2/USP6, BUB2, cdc16) domain family, member 1
SERINC3	serine incorporator 3
SPHK1	sphingosine kinase 1
RAB3D	RAB3D, member RAS oncogene family
SCUBE1	signal peptide, CUB domain, EGF-like 1
WNK2	WNK lysine deficient protein kinase 2
TBC1D16	TBC1 domain family, member 16
SLMO1	slowmo homolog 1 (Drosophila)
DHRSX	dehydrogenase/reductase (SDR family) X-linked
C12orf74	chromosome 12 open reading frame 74
SPRED1	sprouty-related, EVH1 domain containing 1
CANT1	calcium activated nucleotidase 1
MTMR4	myotubularin related protein 4
ARL14EP	ADP-ribosylation factor-like 14 effector protein
SPOCK2	sparc/osteonectin, cwcv and kazal-like domains proteoglycan (testican) 2
LMOD1	leiomodin 1 (smooth muscle)
SEPT3	septin 3
COMMD9	COMM domain containing 9
ATN1	atrophin 1
B3GNTL1	UDP-GlcNAc:betaGal beta-1,3-N-acetylglucosaminyltransferase-like 1
FRAT1	frequently rearranged in advanced T-cell lymphomas
YDJC	YdjC homolog (bacterial)
SUDS3	suppressor of defective silencing 3 homolog (S. cerevisiae)
B3GNT7	UDP-GlcNAc:betaGal beta-1,3-N-acetylglucosaminyltransferase 7
RSPO1	R-spondin 1
CRCP	CGRP receptor component
PAQR6	progestin and adipoQ receptor family member VI
GABRA3	gamma-aminobutyric acid (GABA) A receptor, alpha 3
CHD2	chromodomain helicase DNA binding protein 2
C6orf141	chromosome 6 open reading frame 141
TBC1D23	TBC1 domain family, member 23
KHK	ketohexokinase (fructokinase)
RASL11B	RAS-like, family 11, member B
TRIM65	tripartite motif containing 65
BDKRB2	bradykinin receptor B2
CSNK1G1	casein kinase 1, gamma 1
TFE3	transcription factor binding to IGHM enhancer 3
DNAH17-AS1	DNAH17 antisense RNA 1
PPIF	peptidylprolyl isomerase F
ZNF70	zinc finger protein 70
MORN5	MORN repeat containing 5
SLC4A2	solute carrier family 4 (anion exchanger), member 2
MAFF	v-maf avian musculoaponeurotic fibrosarcoma oncogene homolog F
SLC22A31	solute carrier family 22, member 31
GRK1	G protein-coupled receptor kinase 1
HOXA11	homeobox A11
SOCS2	suppressor of cytokine signaling 2
TMEM50A	transmembrane protein 50A
CALM3	calmodulin 3 (phosphorylase kinase, delta)
DRAXIN	dorsal inhibitory axon guidance protein
MYL9	myosin, light chain 9, regulatory
SPTLC3	serine palmitoyltransferase, long chain base subunit 3
HOXB9	homeobox B9
ACTL10	actin-like 10
CD93	CD93 molecule
SRSF10	serine/arginine-rich splicing factor 10
FMNL3	formin-like 3
FOSL1	FOS-like antigen 1
ACTN4	actinin, alpha 4
MYO7A	myosin VIIA
LHX1	LIM homeobox 1
IL34	interleukin 34
TIFAB	TRAF-interacting protein with forkhead-associated domain, family member B
C5orf64	chromosome 5 open reading frame 64
HMGN3	high mobility group nucleosomal binding domain 3
ST8SIA2	ST8 alpha-N-acetyl-neuraminide alpha-2,8-sialyltransferase 2
VASH1	vasohibin 1
ASAH2B	N-acylsphingosine amidohydrolase (non-lysosomal ceramidase) 2B
NLRC3	NLR family, CARD domain containing 3
ITGB8	integrin, beta 8
C6orf47	chromosome 6 open reading frame 47
MGEA5	meningioma expressed antigen 5 (hyaluronidase)
GPR158	G protein-coupled receptor 158
PCTP	phosphatidylcholine transfer protein
ELK1	ELK1, member of ETS oncogene family
KIR2DL4	killer cell immunoglobulin-like receptor, two domains, long cytoplasmic tail, 4
SRRM5	serine/arginine repetitive matrix 5
MEF2BNB	MEF2B neighbor
TMEM215	transmembrane protein 215
TMUB2	transmembrane and ubiquitin-like domain containing 2
TAT	tyrosine aminotransferase
AP001631.10
ANGPTL4	angiopoietin-like 4
CEND1	cell cycle exit and neuronal differentiation 1
XKR9	XK, Kell blood group complex subunit-related family, member 9
NFATC4	nuclear factor of activated T-cells, cytoplasmic, calcineurin-dependent 4
STARD7	StAR-related lipid transfer (START) domain containing 7
EPOR	erythropoietin receptor
FOXJ2	forkhead box J2
ING5	inhibitor of growth family, member 5
TMEM213	transmembrane protein 213
MBD2	methyl-CpG binding domain protein 2
URM1	ubiquitin related modifier 1
TEAD2	TEA domain family member 2
HAUS2	HAUS augmin-like complex, subunit 2
GUCA2B	guanylate cyclase activator 2B (uroguanylin)
ZNF384	zinc finger protein 384
HMHB1	histocompatibility (minor) HB-1
MNT	MNT, MAX dimerization protein
MAP3K7CL	MAP3K7 C-terminal like
GRINA	glutamate receptor, ionotropic, N-methyl D-aspartate-associated protein 1 (glutamate binding)
AGPS	alkylglycerone phosphate synthase
SFTPC	surfactant protein C
BNIP1	BCL2/adenovirus E1B 19kDa interacting protein 1
DRP2	dystrophin related protein 2
GALNT10	UDP-N-acetyl-alpha-D-galactosamine:polypeptide N-acetylgalactosaminyltransferase 10 (GalNAc-T10)
C13orf45	chromosome 13 open reading frame 45
MAPKAP1	mitogen-activated protein kinase associated protein 1
DUOX1	dual oxidase 1
TMEM91	transmembrane protein 91
LSS	lanosterol synthase (2,3-oxidosqualene-lanosterol cyclase)
TMEM82	transmembrane protein 82
AC008060.7	HCG2000720; Hypothetical gene supported by AK054822; Uncharacterized protein
HAUS7	HAUS augmin-like complex, subunit 7
CDKL2	cyclin-dependent kinase-like 2 (CDC2-related kinase)
FLJ14816
ACACB	acetyl-CoA carboxylase beta
CFHR5	complement factor H-related 5
FKRP	fukutin related protein
C19orf73	chromosome 19 open reading frame 73
MOCOS	molybdenum cofactor sulfurase
RNF167	ring finger protein 167
HES7	hairy and enhancer of split 7 (Drosophila)
SLC9A5	solute carrier family 9, subfamily A (NHE5, cation proton antiporter 5), member 5
XXbac-BPG32J3.20
CA12	carbonic anhydrase XII
NCR3LG1	natural killer cell cytotoxicity receptor 3 ligand 1
ITGBL1	integrin, beta-like 1 (with EGF-like repeat domains)
NAV1	neuron navigator 1
ANKRD13B	ankyrin repeat domain 13B
PSME3	proteasome (prosome, macropain) activator subunit 3 (PA28 gamma; Ki)
FAM91A1	family with sequence similarity 91, member A1
HMGXB3	HMG box domain containing 3
FLYWCH1	FLYWCH-type zinc finger 1
GNS	glucosamine (N-acetyl)-6-sulfatase
PELI2	pellino E3 ubiquitin protein ligase family member 2
C14orf80	chromosome 14 open reading frame 80
IPO7	importin 7
CMTM3	CKLF-like MARVEL transmembrane domain containing 3
GPSM3	G-protein signaling modulator 3
TTC5	tetratricopeptide repeat domain 5
NAA10	N(alpha)-acetyltransferase 10, NatA catalytic subunit
TUBGCP6	tubulin, gamma complex associated protein 6
ANKRD9	ankyrin repeat domain 9
SEMA7A	semaphorin 7A, GPI membrane anchor (John Milton Hagen blood group)
PLA2G2F	phospholipase A2, group IIF
RTN3	reticulon 3
EIF4H	eukaryotic translation initiation factor 4H
SYNGR2	synaptogyrin 2
SLC6A14	solute carrier family 6 (amino acid transporter), member 14
GPRIN1	G protein regulated inducer of neurite outgrowth 1
SNRPC	small nuclear ribonucleoprotein polypeptide C
C14orf142	chromosome 14 open reading frame 142
MAGEL2	MAGE-like 2
CCDC115	coiled-coil domain containing 115
ZIC4	Zic family member 4
KIAA1024L	KIAA1024-like
HS1BP3	HCLS1 binding protein 3
GDF6	growth differentiation factor 6
NDUFS7	NADH dehydrogenase (ubiquinone) Fe-S protein 7, 20kDa (NADH-coenzyme Q reductase)
PCDH12	protocadherin 12
TACR1	tachykinin receptor 1
ASB8	ankyrin repeat and SOCS box containing 8
ZC3H7B	zinc finger CCCH-type containing 7B
TEF	thyrotrophic embryonic factor
CEMP1	cementum protein 1
CHRDL1	chordin-like 1
SP8	Sp8 transcription factor
POLL	polymerase (DNA directed), lambda
ZNF740	zinc finger protein 740
GPR176	G protein-coupled receptor 176
C4orf46	chromosome 4 open reading frame 46
RAB35	RAB35, member RAS oncogene family
CCDC69	coiled-coil domain containing 69
JAK3	Janus kinase 3
CALCB	calcitonin-related polypeptide beta
SLC8B1	solute carrier family 8 (sodium/lithium/calcium exchanger), member B1
GABRA1	gamma-aminobutyric acid (GABA) A receptor, alpha 1
PDRG1	p53 and DNA-damage regulated 1
C14orf159	chromosome 14 open reading frame 159
CLCN4	chloride channel, voltage-sensitive 4
CHD5	chromodomain helicase DNA binding protein 5
C11orf21	chromosome 11 open reading frame 21
SLC9A1	solute carrier family 9, subfamily A (NHE1, cation proton antiporter 1), member 1
AL133373.1	Uncharacterized protein
AGER	advanced glycosylation end product-specific receptor
LDLRAD2	low density lipoprotein receptor class A domain containing 2
FAM83B	family with sequence similarity 83, member B
FOXC1	forkhead box C1
GDF7	growth differentiation factor 7
NCCRP1	non-specific cytotoxic cell receptor protein 1 homolog (zebrafish)
KIF18B	kinesin family member 18B
C19orf66	chromosome 19 open reading frame 66
CSRP1	cysteine and glycine-rich protein 1
MPDU1	mannose-P-dolichol utilization defect 1
SLC16A3	solute carrier family 16 (monocarboxylate transporter), member 3
UBL4A	ubiquitin-like 4A
CA7	carbonic anhydrase VII
TMEM19	transmembrane protein 19
RAF1	v-raf-1 murine leukemia viral oncogene homolog 1
LY6D	lymphocyte antigen 6 complex, locus D
AC104667.3
FIBIN	fin bud initiation factor homolog (zebrafish)
GDF15	growth differentiation factor 15
AGO4	argonaute RISC catalytic component 4
IKZF2	IKAROS family zinc finger 2 (Helios)
SIRT6	sirtuin 6
CCDC71L	coiled-coil domain containing 71-like
PRUNE	prune exopolyphosphatase
G3BP2	GTPase activating protein (SH3 domain) binding protein 2
TNFRSF10B	tumor necrosis factor receptor superfamily, member 10b
DGKD	diacylglycerol kinase, delta 130kDa
MAP7D1	MAP7 domain containing 1
TMEM55B	transmembrane protein 55B
NPHP3	nephronophthisis 3 (adolescent)
ABCA3	ATP-binding cassette, sub-family A (ABC1), member 3
USP47	ubiquitin specific peptidase 47
CPSF3L	cleavage and polyadenylation specific factor 3-like
MFRP	membrane frizzled-related protein
CTD-2267D19.3	Uncharacterized protein
EIF4EBP2	eukaryotic translation initiation factor 4E binding protein 2
CHCHD5	coiled-coil-helix-coiled-coil-helix domain containing 5
AHCYL1	adenosylhomocysteinase-like 1
CCDC180	coiled-coil domain containing 180
MEOX1	mesenchyme homeobox 1
ZNRF1	zinc and ring finger 1, E3 ubiquitin protein ligase
FAM222B	family with sequence similarity 222, member B
EFNA5	ephrin-A5
C22orf42	chromosome 22 open reading frame 42
ANKRD28	ankyrin repeat domain 28
WNT9A	wingless-type MMTV integration site family, member 9A
HOXB4	homeobox B4
FER1L6	fer-1-like 6 (C. elegans)
AC005003.1	CDNA FLJ20464 fis, clone KAT06158; HCG1777549; Uncharacterized protein
RNF157	ring finger protein 157
DZIP1L	DAZ interacting zinc finger protein 1-like
MEGF8	multiple EGF-like-domains 8
TUB	tubby bipartite transcription factor
C10orf53	chromosome 10 open reading frame 53
CHP1	calcineurin-like EF-hand protein 1
PRKX	protein kinase, X-linked
REXO4	REX4, RNA exonuclease 4 homolog (S. cerevisiae)
CHST14	carbohydrate (N-acetylgalactosamine 4-0) sulfotransferase 14
GNB4	guanine nucleotide binding protein (G protein), beta polypeptide 4
ARHGEF18	Rho/Rac guanine nucleotide exchange factor (GEF) 18
FAM218A	family with sequence similarity 218, member A
TMEM132B	transmembrane protein 132B
AC010327.2	Uncharacterized protein; cDNA FLJ45856 fis, clone OCBBF2025631
C4orf51	chromosome 4 open reading frame 51
HCAR1	hydroxycarboxylic acid receptor 1
HEBP1	heme binding protein 1
DTNA	dystrobrevin, alpha
NKX2-4	NK2 homeobox 4
SH3BP4	SH3-domain binding protein 4
RUNDC3B	RUN domain containing 3B
OPALIN	oligodendrocytic myelin paranodal and inner loop protein
RPS6KL1	ribosomal protein S6 kinase-like 1
IP6K2	inositol hexakisphosphate kinase 2
BGN	biglycan
SLC7A5	solute carrier family 7 (amino acid transporter light chain, L system), member 5
RPL22	ribosomal protein L22
ROGDI	rogdi homolog (Drosophila)
ARHGEF17	Rho guanine nucleotide exchange factor (GEF) 17
FAM53A	family with sequence similarity 53, member A
PRSS57	protease, serine, 57
EFNA4	ephrin-A4
CACNB2	calcium channel, voltage-dependent, beta 2 subunit
CMTM5	CKLF-like MARVEL transmembrane domain containing 5
MATK	megakaryocyte-associated tyrosine kinase
SLC16A6	solute carrier family 16, member 6
XKR7	XK, Kell blood group complex subunit-related family, member 7
SDR9C7	short chain dehydrogenase/reductase family 9C, member 7
RPL13A	ribosomal protein L13a
RASD2	RASD family, member 2
C9orf142	chromosome 9 open reading frame 142
TCTE1	t-complex-associated-testis-expressed 1
ADPRHL1	ADP-ribosylhydrolase like 1
C18orf25	chromosome 18 open reading frame 25
ZNRF3	zinc and ring finger 3
NUFIP2	nuclear fragile X mental retardation protein interacting protein 2
NAALADL1	N-acetylated alpha-linked acidic dipeptidase-like 1
EPHX2	epoxide hydrolase 2, cytoplasmic
PIKFYVE	phosphoinositide kinase, FYVE finger containing
C16orf70	chromosome 16 open reading frame 70
HELZ2	helicase with zinc finger 2, transcriptional coactivator
UBE3A	ubiquitin protein ligase E3A
C9orf170	chromosome 9 open reading frame 170
AC079612.1	Uncharacterized protein; cDNA FLJ45964 fis, clone PLACE7014396
C5orf45	chromosome 5 open reading frame 45
CPSF7	cleavage and polyadenylation specific factor 7, 59kDa
SLC6A13	solute carrier family 6 (neurotransmitter transporter), member 13
KLHDC8B	kelch domain containing 8B
TRPV5	transient receptor potential cation channel, subfamily V, member 5
LRRTM2	leucine rich repeat transmembrane neuronal 2
EDEM1	ER degradation enhancer, mannosidase alpha-like 1
PTS	6-pyruvoyltetrahydropterin synthase
STK17B	serine/threonine kinase 17b
MED1	mediator complex subunit 1
DDR1	discoidin domain receptor tyrosine kinase 1
TMEM106A	transmembrane protein 106A
ZNF135	zinc finger protein 135
SMARCC1	SWI/SNF related, matrix associated, actin dependent regulator of chromatin, subfamily c, member 1
ZMIZ2	zinc finger, MIZ-type containing 2
PARVA	parvin, alpha
DYNLL2	dynein, light chain, LC8-type 2
LRRC20	leucine rich repeat containing 20
CLIP2	CAP-GLY domain containing linker protein 2
CORO6	coronin 6
PPIP5K1	diphosphoinositol pentakisphosphate kinase 1
MXD3	MAX dimerization protein 3
TNFAIP8L2	tumor necrosis factor, alpha-induced protein 8-like 2
DDIT4	DNA-damage-inducible transcript 4
C5	complement component 5
FBXL19	F-box and leucine-rich repeat protein 19
PLB1	phospholipase B1
CDHR3	cadherin-related family member 3
ABCD4	ATP-binding cassette, sub-family D (ALD), member 4
C1orf177	chromosome 1 open reading frame 177
GPC6	glypican 6
DPYSL3	dihydropyrimidinase-like 3
ABL2	c-abl oncogene 2, non-receptor tyrosine kinase
PIP5K1A	phosphatidylinositol-4-phosphate 5-kinase, type I, alpha
TMEM151A	transmembrane protein 151A
SLC25A21-AS1	SLC25A21 antisense RNA 1
ZGLP1	zinc finger, GATA-like protein 1
SMIM8	small integral membrane protein 8
SHC2	SHC (Src homology 2 domain containing) transforming protein 2
RPAP1	RNA polymerase II associated protein 1
GPR116	G protein-coupled receptor 116
B4GALNT3	beta-1,4-N-acetyl-galactosaminyl transferase 3
SFTPB	surfactant protein B
RPS17L	ribosomal protein S17-like
LMX1A	LIM homeobox transcription factor 1, alpha
SPRY3	sprouty homolog 3 (Drosophila)
PPM1H	protein phosphatase, Mg2+/Mn2+ dependent, 1H
GABRB3	gamma-aminobutyric acid (GABA) A receptor, beta 3
MARCO	macrophage receptor with collagenous structure
FAM83C	family with sequence similarity 83, member C
CXCL9	chemokine (C-X-C motif) ligand 9
RAX2	retina and anterior neural fold homeobox 2
PAQR8	progestin and adipoQ receptor family member VIII
SLCO2A1	solute carrier organic anion transporter family, member 2A1
SPRED2	sprouty-related, EVH1 domain containing 2
FUT6	fucosyltransferase 6 (alpha (1,3) fucosyltransferase)
POU2AF1	POU class 2 associating factor 1
ZDHHC22	zinc finger, DHHC-type containing 22
NFIB	nuclear factor I/B
FAM84B	family with sequence similarity 84, member B
PEF1	penta-EF-hand domain containing 1
FBXW5	F-box and WD repeat domain containing 5
CCDC94	coiled-coil domain containing 94
ZNF672	zinc finger protein 672
SH3PXD2A	SH3 and PX domains 2A
TRIM44	tripartite motif containing 44
GABRG2	gamma-aminobutyric acid (GABA) A receptor, gamma 2
PIGZ	phosphatidylinositol glycan anchor biosynthesis, class Z
WNT3A	wingless-type MMTV integration site family, member 3A
HSPA12B	heat shock 70kD protein 12B
CDCA8	cell division cycle associated 8
NHS	Nance-Horan syndrome (congenital cataracts and dental anomalies)
MBNL2	muscleblind-like splicing regulator 2
RFC5	replication factor C (activator 1) 5, 36.5kDa
RTFDC1	replication termination factor 2 domain containing 1
CPXM1	carboxypeptidase X (M14 family), member 1
CPEB3	cytoplasmic polyadenylation element binding protein 3
DUOXA1	dual oxidase maturation factor 1
CTD-2368P22.1	HCG1811579; Uncharacterized protein
CARD8	caspase recruitment domain family, member 8
NUTF2	nuclear transport factor 2
DHRS4-AS1
PPP1R3B	protein phosphatase 1, regulatory subunit 3B
ALCAM	activated leukocyte cell adhesion molecule
HDAC11	histone deacetylase 11
DOK4	docking protein 4
CCDC88C	coiled-coil domain containing 88C
NOS1	nitric oxide synthase 1 (neuronal)
ANKRD10	ankyrin repeat domain 10
CDA	cytidine deaminase
ERCC2	excision repair cross-complementing rodent repair deficiency, complementation group 2
RAB40C	RAB40C, member RAS oncogene family
GAPT	GRB2-binding adaptor protein, transmembrane
ACTR1B	ARP1 actin-related protein 1 homolog B, centractin beta (yeast)
RALBP1	ralA binding protein 1
FAM109A	family with sequence similarity 109, member A
STK11IP	serine/threonine kinase 11 interacting protein
PIDD	p53-induced death domain protein
PRR19	proline rich 19
TAS2R4	taste receptor, type 2, member 4
ARFRP1	ADP-ribosylation factor related protein 1
MYBPC3	myosin binding protein C, cardiac
MAVS	mitochondrial antiviral signaling protein
LYPD5	LY6/PLAUR domain containing 5
CYB561D1	cytochrome b561 family, member D1
RASGEF1C	RasGEF domain family, member 1C
SSNA1	Sjogren syndrome nuclear autoantigen 1
NDOR1	NADPH dependent diflavin oxidoreductase 1
GJB2	gap junction protein, beta 2, 26kDa
PLCD1	phospholipase C, delta 1
MYOG	myogenin (myogenic factor 4)
C21orf59	chromosome 21 open reading frame 59
KLHL25	kelch-like family member 25
FLT1	fms-related tyrosine kinase 1
KCNK3	potassium channel, subfamily K, member 3
KMO	kynurenine 3-monooxygenase (kynurenine 3-hydroxylase)
PTGES2	prostaglandin E synthase 2
JAKMIP3	Janus kinase and microtubule interacting protein 3
ARVCF	armadillo repeat gene deleted in velocardiofacial syndrome
CDKN3	cyclin-dependent kinase inhibitor 3
LRRC4B	leucine rich repeat containing 4B
RNPEPL1	arginyl aminopeptidase (aminopeptidase B)-like 1
SBK2	SH3 domain binding kinase family, member 2
ZNF584	zinc finger protein 584
JUNB	jun B proto-oncogene
ZMAT3	zinc finger, matrin-type 3
SECISBP2L	SECIS binding protein 2-like
SLC32A1	solute carrier family 32 (GABA vesicular transporter), member 1
AC008964.1
VAT1	vesicle amine transport 1
RNF115	ring finger protein 115
CDC42EP4	CDC42 effector protein (Rho GTPase binding) 4
SLC19A1	solute carrier family 19 (folate transporter), member 1
ZNF587B	zinc finger protein 587B
STK25	serine/threonine kinase 25
NADK	NAD kinase
KIF19	kinesin family member 19
OGG1	8-oxoguanine DNA glycosylase
PIFO	primary cilia formation
MLLT4	myeloid/lymphoid or mixed-lineage leukemia (trithorax homolog, Drosophila); translocated to, 4
CD177	CD177 molecule
PGM5	phosphoglucomutase 5
RBM38	RNA binding motif protein 38
SERPINA4	serpin peptidase inhibitor, clade A (alpha-1 antiproteinase, antitrypsin), member 4
PAQR7	progestin and adipoQ receptor family member VII
ZNF195	zinc finger protein 195
BAIAP2L2	BAI1-associated protein 2-like 2
EXTL3	exostosin-like glycosyltransferase 3
SCRN1	secernin 1
LYRM1	LYR motif containing 1
TFEC	transcription factor EC
POLR1C	polymerase (RNA) I polypeptide C, 30kDa
ZNF324	zinc finger protein 324
GPR26	G protein-coupled receptor 26
DAG1	dystroglycan 1 (dystrophin-associated glycoprotein 1)
TOM1	target of myb1 (chicken)
RAPGEF1	Rap guanine nucleotide exchange factor (GEF) 1
DCAKD	dephospho-CoA kinase domain containing
PPT2	palmitoyl-protein thioesterase 2
PRTFDC1	phosphoribosyl transferase domain containing 1
CCNT2	cyclin T2
PEX26	peroxisomal biogenesis factor 26
CTCFL	CCCTC-binding factor (zinc finger protein)-like
PRDM8	PR domain containing 8
LUZP4	leucine zipper protein 4
ARL5C	ADP-ribosylation factor-like 5C
BIN3	bridging integrator 3
ADAMTS2	ADAM metallopeptidase with thrombospondin type 1 motif, 2
TJP2	tight junction protein 2
YOD1	YOD1 deubiquitinase
ADARB1	adenosine deaminase, RNA-specific, B1
PDE4D	phosphodiesterase 4D, cAMP-specific
PYCRL	pyrroline-5-carboxylate reductase-like
PRKAA2	protein kinase, AMP-activated, alpha 2 catalytic subunit
EHD3	EH-domain containing 3
PSMB2	proteasome (prosome, macropain) subunit, beta type, 2
FLOT2	flotillin 2
CILP2	cartilage intermediate layer protein 2
TPPP3	tubulin polymerization-promoting protein family member 3
RD3	retinal degeneration 3
TK2	thymidine kinase 2, mitochondrial
PARVG	parvin, gamma
KLF13	Kruppel-like factor 13
ARHGAP30	Rho GTPase activating protein 30
PLA2G2C	phospholipase A2, group IIC
SH2D4A	SH2 domain containing 4A
WDR1	WD repeat domain 1
ADAMTS1	ADAM metallopeptidase with thrombospondin type 1 motif, 1
TMEM37	transmembrane protein 37
C19orf80	chromosome 19 open reading frame 80
NOLC1	nucleolar and coiled-body phosphoprotein 1
SLC52A1	solute carrier family 52 (riboflavin transporter), member 1
C1QL3	complement component 1, q subcomponent-like 3
CYTH1	cytohesin 1
UNC5D	unc-5 homolog D (C. elegans)
SLC34A2	solute carrier family 34 (type II sodium/phosphate contransporter), member 2
TMEM17	transmembrane protein 17
MARK4	MAP/microtubule affinity-regulating kinase 4
C1orf95	chromosome 1 open reading frame 95
ZKSCAN3	zinc finger with KRAB and SCAN domains 3
C1orf115	chromosome 1 open reading frame 115
U2AF1L4	U2 small nuclear RNA auxiliary factor 1-like 4
FAM131B	family with sequence similarity 131, member B
UPK1A	uroplakin 1A
SOX13	SRY (sex determining region Y)-box 13
STRA13	stimulated by retinoic acid 13
FAM179B	family with sequence similarity 179, member B
ZNF324B	zinc finger protein 324B
SLC39A9	solute carrier family 39, member 9
PREX2	phosphatidylinositol-3,4,5-trisphosphate-dependent Rac exchange factor 2
NDP	Norrie disease (pseudoglioma)
CRIM1	cysteine rich transmembrane BMP regulator 1 (chordin-like)
MICAL3	microtubule associated monooxygenase, calponin and LIM domain containing 3
NFIA	nuclear factor I/A
AEBP2	AE binding protein 2
RAB37	RAB37, member RAS oncogene family
RASSF7	Ras association (RalGDS/AF-6) domain family (N-terminal) member 7
IL10RA	interleukin 10 receptor, alpha
ISM1	isthmin 1, angiogenesis inhibitor
C17orf105	chromosome 17 open reading frame 105
PPP1R16B	protein phosphatase 1, regulatory subunit 16B
DCDC2	doublecortin domain containing 2
LPAR5	lysophosphatidic acid receptor 5
ABLIM2	actin binding LIM protein family, member 2
ADAMTS5	ADAM metallopeptidase with thrombospondin type 1 motif, 5
DPH1	diphthamide biosynthesis 1
AC005481.5	Uncharacterized protein
UBE2G2	ubiquitin-conjugating enzyme E2G 2
TTC31	tetratricopeptide repeat domain 31
CDH13	cadherin 13
KCNA6	potassium voltage-gated channel, shaker-related subfamily, member 6
KCNS2	potassium voltage-gated channel, delayed-rectifier, subfamily S, member 2
BMP6	bone morphogenetic protein 6
DDX23	DEAD (Asp-Glu-Ala-Asp) box polypeptide 23
ERI1	exoribonuclease 1
SLC9A8	solute carrier family 9, subfamily A (NHE8, cation proton antiporter 8), member 8
TPD52L3	tumor protein D52-like 3
CCHCR1	coiled-coil alpha-helical rod protein 1
PPP1R27	protein phosphatase 1, regulatory subunit 27
ABL1	c-abl oncogene 1, non-receptor tyrosine kinase
MYLK2	myosin light chain kinase 2
HCFC1R1	host cell factor C1 regulator 1 (XPO1 dependent)
BMF	Bcl2 modifying factor
TULP4	tubby like protein 4
METTL23	methyltransferase like 23
PSG9	pregnancy specific beta-1-glycoprotein 9
ZNF776	zinc finger protein 776
PCSK9	proprotein convertase subtilisin/kexin type 9
RALGPS1	Ral GEF with PH domain and SH3 binding motif 1
ZNF212	zinc finger protein 212
TCAP	titin-cap
CCDC3	coiled-coil domain containing 3
MRPL9	mitochondrial ribosomal protein L9
WNT7B	wingless-type MMTV integration site family, member 7B
HEYL	hairy/enhancer-of-split related with YRPW motif-like
OLIG2	oligodendrocyte lineage transcription factor 2
KCTD7	potassium channel tetramerization domain containing 7
CYP2J2	cytochrome P450, family 2, subfamily J, polypeptide 2
ZNF177	Zinc finger protein 177
AC174470.1
CRMP1	collapsin response mediator protein 1
PFKFB4	6-phosphofructo-2-kinase/fructose-2,6-biphosphatase 4
RADIL	Ras association and DIL domains
DCDC2B	doublecortin domain containing 2B
E2F2	E2F transcription factor 2
TMPPE	transmembrane protein with metallophosphoesterase domain
LSM4	LSM4 homolog, U6 small nuclear RNA associated (S. cerevisiae)
EIF2AK2	eukaryotic translation initiation factor 2-alpha kinase 2
HIPK1	homeodomain interacting protein kinase 1
EBP	emopamil binding protein (sterol isomerase)
SCN4A	sodium channel, voltage-gated, type IV, alpha subunit
TBXA2R	thromboxane A2 receptor
ZKSCAN1	zinc finger with KRAB and SCAN domains 1
PRLR	prolactin receptor
TREML2	triggering receptor expressed on myeloid cells-like 2
PLGLB2	plasminogen-like B2
PLGLB1	plasminogen-like B1
CISH	cytokine inducible SH2-containing protein
PALD1	phosphatase domain containing, paladin 1
UBASH3B	ubiquitin associated and SH3 domain containing B
CTDSPL	CTD (carboxy-terminal domain, RNA polymerase II, polypeptide A) small phosphatase-like
C11orf84	chromosome 11 open reading frame 84
LGALSL	lectin, galactoside-binding-like
KAT6A	K(lysine) acetyltransferase 6A
MTMR9	myotubularin related protein 9
DBN1	drebrin 1
PDLIM2	PDZ and LIM domain 2 (mystique)
KSR2	kinase suppressor of ras 2
CLUAP1	clusterin associated protein 1
LPP	LIM domain containing preferred translocation partner in lipoma
ALAD	aminolevulinate dehydratase
PLXNA2	plexin A2
CPSF4	cleavage and polyadenylation specific factor 4, 30kDa
ZNF829	zinc finger protein 829
C6orf222	chromosome 6 open reading frame 222
GPR4	G protein-coupled receptor 4
DAB2IP	DAB2 interacting protein
MLC1	megalencephalic leukoencephalopathy with subcortical cysts 1
HOMER1	homer homolog 1 (Drosophila)
NAT8L	N-acetyltransferase 8-like (GCN5-related, putative)
JAM3	junctional adhesion molecule 3
MEN1	multiple endocrine neoplasia I
EFR3A	EFR3 homolog A (S. cerevisiae)
JHDM1D	jumonji C domain containing histone demethylase 1 homolog D (S. cerevisiae)
HMGXB4	HMG box domain containing 4
KIAA0355	KIAA0355
OSM	oncostatin M
RFC1	replication factor C (activator 1) 1, 145kDa
PPP1R1B	protein phosphatase 1, regulatory (inhibitor) subunit 1B
PI16	peptidase inhibitor 16
ATXN1	ataxin 1
TRMT61A	tRNA methyltransferase 61 homolog A (S. cerevisiae)
ADNP2	ADNP homeobox 2
RAP2A	RAP2A, member of RAS oncogene family
PIM3	pim-3 oncogene
IFT88	intraflagellar transport 88 homolog (Chlamydomonas)
ERF	Ets2 repressor factor
AL590483.1	Uncharacterized protein; cDNA FLJ42623 fis, clone BRACE3015894
KIRREL2	kin of IRRE like 2 (Drosophila)
MOCS2	molybdenum cofactor synthesis 2
NHLRC4	NHL repeat containing 4
ZBTB39	zinc finger and BTB domain containing 39
AIG1	androgen-induced 1
CYP1B1	cytochrome P450, family 1, subfamily B, polypeptide 1
SRGN	serglycin
CAPN2	calpain 2, (m/II) large subunit
RAB3IL1	RAB3A interacting protein (rabin3)-like 1
ZBTB16	zinc finger and BTB domain containing 16
ZKSCAN8	zinc finger with KRAB and SCAN domains 8
SURF6	surfeit 6
ZNF623	zinc finger protein 623
SLC25A15	solute carrier family 25 (mitochondrial carrier; ornithine transporter) member 15
KLF1	Kruppel-like factor 1 (erythroid)
SMARCD2	SWI/SNF related, matrix associated, actin dependent regulator of chromatin, subfamily d, member 2
ANKRD20A1	ankyrin repeat domain 20 family, member A1
RP11-366L20.2	Uncharacterized protein
C7orf43	chromosome 7 open reading frame 43
MEF2D	myocyte enhancer factor 2D
OTUD4	OTU domain containing 4
F2RL3	coagulation factor II (thrombin) receptor-like 3
PAPPA	pregnancy-associated plasma protein A, pappalysin 1
PIH1D3	PIH1 domain containing 3
SFRP1	secreted frizzled-related protein 1
KIF3C	kinesin family member 3C
SLC30A6	solute carrier family 30 (zinc transporter), member 6
LPHN1	latrophilin 1
IGF2R	insulin-like growth factor 2 receptor
PCP4L1	Purkinje cell protein 4 like 1
SDR42E1	short chain dehydrogenase/reductase family 42E, member 1
DYRK1A	dual-specificity tyrosine-(Y)-phosphorylation regulated kinase 1A
CEP19	centrosomal protein 19kDa
PCDH10	protocadherin 10
TLR6	toll-like receptor 6
ZNF24	zinc finger protein 24
SLC35E1	solute carrier family 35, member E1
RAD21	RAD21 homolog (S. pombe)
CACUL1	CDK2-associated, cullin domain 1
C1orf21	chromosome 1 open reading frame 21
CYR61	cysteine-rich, angiogenic inducer, 61
RALA	v-ral simian leukemia viral oncogene homolog A (ras related)
PRDM6	PR domain containing 6
RASA4	RAS p21 protein activator 4
DPYSL4	dihydropyrimidinase-like 4
ZNF385A	zinc finger protein 385A
KIRREL	kin of IRRE like (Drosophila)
MRPS12	mitochondrial ribosomal protein S12
ATP6V0A1	ATPase, H+ transporting, lysosomal V0 subunit a1
VANGL1	VANGL planar cell polarity protein 1
CDK6	cyclin-dependent kinase 6
CHEK1	checkpoint kinase 1
FAM160B2	family with sequence similarity 160, member B2
MRAP2	melanocortin 2 receptor accessory protein 2
PWWP2A	PWWP domain containing 2A
OLA1	Obg-like ATPase 1
MYO5C	myosin VC
GRAMD4	GRAM domain containing 4
EPHA2	EPH receptor A2
PDE6D	phosphodiesterase 6D, cGMP-specific, rod, delta
NKAIN1	Na+/K+ transporting ATPase interacting 1
IL17RE	interleukin 17 receptor E
IL8	interleukin 8
ZNF517	zinc finger protein 517
TDRP	testis development related protein
C7orf13	chromosome 7 open reading frame 13
RAVER1	ribonucleoprotein, PTB-binding 1
GREB1L	growth regulation by estrogen in breast cancer-like
FLVCR2	feline leukemia virus subgroup C cellular receptor family, member 2
BEND4	BEN domain containing 4
MDFI	MyoD family inhibitor
SLC45A4	solute carrier family 45, member 4
NOM1	nucleolar protein with MIF4G domain 1
GPR173	G protein-coupled receptor 173
RNF121	ring finger protein 121
PNO1	partner of NOB1 homolog (S. cerevisiae)
GLTP	glycolipid transfer protein
CCDC172	coiled-coil domain containing 172
TOMM40	translocase of outer mitochondrial membrane 40 homolog (yeast)
TEAD3	TEA domain family member 3
TLCD1	TLC domain containing 1
PREX1	phosphatidylinositol-3,4,5-trisphosphate-dependent Rac exchange factor 1
LINGO1	leucine rich repeat and Ig domain containing 1
AP5B1	adaptor-related protein complex 5, beta 1 subunit
SERPINE1	serpin peptidase inhibitor, clade E (nexin, plasminogen activator inhibitor type 1), member 1
EPS8L2	EPS8-like 2
PPP2R2B	protein phosphatase 2, regulatory subunit B, beta
KLRK1	killer cell lectin-like receptor subfamily K, member 1
RP11-382J12.1	Uncharacterized protein
ASAH2	N-acylsphingosine amidohydrolase (non-lysosomal ceramidase) 2
TMEM256-PLSCR3	TMEM256-PLSCR3 readthrough (NMD candidate)
NFKB2	nuclear factor of kappa light polypeptide gene enhancer in B-cells 2 (p49/p100)
FAM208A	family with sequence similarity 208, member A
ZNF704	zinc finger protein 704
CERK	ceramide kinase
GCC1	GRIP and coiled-coil domain containing 1
TRIB2	tribbles pseudokinase 2
NR4A3	nuclear receptor subfamily 4, group A, member 3
GABRA4	gamma-aminobutyric acid (GABA) A receptor, alpha 4
SLC38A5	solute carrier family 38, member 5
ACACA	acetyl-CoA carboxylase alpha
USF2	upstream transcription factor 2, c-fos interacting
IFITM10	interferon induced transmembrane protein 10
PGRMC2	progesterone receptor membrane component 2
TMEM88	transmembrane protein 88
DKFZP434H0512	Protein LOC100506667; Putative uncharacterized protein DKFZp434H0512
MMP24	matrix metallopeptidase 24 (membrane-inserted)
CHST3	carbohydrate (chondroitin 6) sulfotransferase 3
C14orf144	chromosome 14 open reading frame 144
ALDH3B1	aldehyde dehydrogenase 3 family, member B1
IL4R	interleukin 4 receptor
LSMEM2	leucine-rich single-pass membrane protein 2
CD82	CD82 molecule
ESYT1	extended synaptotagmin-like protein 1
SFXN2	sideroflexin 2
FGF9	fibroblast growth factor 9
FEM1B	fem-1 homolog b (C. elegans)
MAGEC2	melanoma antigen family C, 2
SPSB4	splA/ryanodine receptor domain and SOCS box containing 4
WDR31	WD repeat domain 31
ST3GAL3	ST3 beta-galactoside alpha-2,3-sialyltransferase 3
ATMIN	ATM interactor
GPR88	G protein-coupled receptor 88
PPAP2A	phosphatidic acid phosphatase type 2A
MAK16	MAK16 homolog (S. cerevisiae)
VLDLR	very low density lipoprotein receptor
CPEB4	cytoplasmic polyadenylation element binding protein 4
GALNTL6	UDP-N-acetyl-alpha-D-galactosamine:polypeptide N-acetylgalactosaminyltransferase-like 6
ITGB2	integrin, beta 2 (complement component 3 receptor 3 and 4 subunit)
GPRC5A	G protein-coupled receptor, family C, group 5, member A
SNN	stannin
EVI5L	ecotropic viral integration site 5-like
INIP	INTS3 and NABP interacting protein
HECTD3	HECT domain containing E3 ubiquitin protein ligase 3
ZNF132	zinc finger protein 132
NT5DC1	5'-nucleotidase domain containing 1
SPEN	spen homolog, transcriptional regulator (Drosophila)
RASGRF1	Ras protein-specific guanine nucleotide-releasing factor 1
TMEM63B	transmembrane protein 63B
FAM26E	family with sequence similarity 26, member E
C2orf48	chromosome 2 open reading frame 48
ZBTB7B	zinc finger and BTB domain containing 7B
TBC1D24	TBC1 domain family, member 24
SLC17A7	solute carrier family 17 (vesicular glutamate transporter), member 7
SAMD1	sterile alpha motif domain containing 1
RGS3	regulator of G-protein signaling 3
GINM1	glycoprotein integral membrane 1
SS18L1	synovial sarcoma translocation gene on chromosome 18-like 1
NMUR1	neuromedin U receptor 1
GIMAP4	GTPase, IMAP family member 4
TSPAN11	tetraspanin 11
FAM20B	family with sequence similarity 20, member B
C22orf46	chromosome 22 open reading frame 46
ANKRD52	ankyrin repeat domain 52
FAM169B	family with sequence similarity 169, member B
UBP1	upstream binding protein 1 (LBP-1a)
IGFALS	insulin-like growth factor binding protein, acid labile subunit
C1orf127	chromosome 1 open reading frame 127
CELF1	CUGBP, Elav-like family member 1
PLAC9	placenta-specific 9
ANKRD20A3	ankyrin repeat domain 20 family, member A3
ANKRD20A4	ankyrin repeat domain 20 family, member A4
CHRNA2	cholinergic receptor, nicotinic, alpha 2 (neuronal)
ADCYAP1R1	adenylate cyclase activating polypeptide 1 (pituitary) receptor type I
APOL3	apolipoprotein L, 3
ROCK2	Rho-associated, coiled-coil containing protein kinase 2
PNLIPRP3	pancreatic lipase-related protein 3
SLC35A1	solute carrier family 35 (CMP-sialic acid transporter), member A1
ZNF687	zinc finger protein 687
DPH2	DPH2 homolog (S. cerevisiae)
FGF22	fibroblast growth factor 22
FUT5	fucosyltransferase 5 (alpha (1,3) fucosyltransferase)
OXGR1	oxoglutarate (alpha-ketoglutarate) receptor 1
DGKZ	diacylglycerol kinase, zeta
ZNF710	zinc finger protein 710
RIPPLY3	ripply transcriptional repressor 3
TMC6	transmembrane channel-like 6
LRRC3	leucine rich repeat containing 3
VPS53	vacuolar protein sorting 53 homolog (S. cerevisiae)
PAK4	p21 protein (Cdc42/Rac)-activated kinase 4
RNF165	ring finger protein 165
ZG16	zymogen granule protein 16
SENP3	SUMO1/sentrin/SMT3 specific peptidase 3
SLC22A17	solute carrier family 22, member 17
PFKFB2	6-phosphofructo-2-kinase/fructose-2,6-biphosphatase 2
LRP4	low density lipoprotein receptor-related protein 4
GBP3	guanylate binding protein 3
EGR1	early growth response 1
BCAS3	breast carcinoma amplified sequence 3
NKPD1	NTPase, KAP family P-loop domain containing 1
SNAP23	synaptosomal-associated protein, 23kDa
FAM109B	family with sequence similarity 109, member B
TNFSF10	tumor necrosis factor (ligand) superfamily, member 10
GPR37L1	G protein-coupled receptor 37 like 1
TRAF2	TNF receptor-associated factor 2
IGLON5	IgLON family member 5
PTPN14	protein tyrosine phosphatase, non-receptor type 14
UBE2Q1	ubiquitin-conjugating enzyme E2Q family member 1
LGSN	lengsin, lens protein with glutamine synthetase domain
ZBTB37	zinc finger and BTB domain containing 37
FUT9	fucosyltransferase 9 (alpha (1,3) fucosyltransferase)
SORD	sorbitol dehydrogenase
CHMP1A	charged multivesicular body protein 1A
KIAA1257	KIAA1257
FAR1	fatty acyl CoA reductase 1
RCOR3	REST corepressor 3
CCR7	chemokine (C-C motif) receptor 7
AL645730.2
PAPPA2	pappalysin 2
SHISA9	shisa family member 9
RHOV	ras homolog family member V
RGS12	regulator of G-protein signaling 12
CFTR	cystic fibrosis transmembrane conductance regulator (ATP-binding cassette sub-family C, member 7)
SLC26A10	solute carrier family 26, member 10
PHF17	PHD finger protein 17
RPTOR	regulatory associated protein of MTOR, complex 1
RCOR1	REST corepressor 1
CACNA1D	calcium channel, voltage-dependent, L type, alpha 1D subunit
ANKMY2	ankyrin repeat and MYND domain containing 2
ENTHD1	ENTH domain containing 1
NUDT13	nudix (nucleoside diphosphate linked moiety X)-type motif 13
POLD1	polymerase (DNA directed), delta 1, catalytic subunit
AL391421.1	Uncharacterized protein; cDNA FLJ43696 fis, clone TBAES2007964
SH3GL1	SH3-domain GRB2-like 1
FAF2	Fas associated factor family member 2
LHX3	LIM homeobox 3
GRB10	growth factor receptor-bound protein 10
NUP62	nucleoporin 62kDa
TIGD5	tigger transposable element derived 5
DDB2	damage-specific DNA binding protein 2, 48kDa
PLCH2	phospholipase C, eta 2
BARHL2	BarH-like homeobox 2
XKR4	XK, Kell blood group complex subunit-related family, member 4
C7orf76	chromosome 7 open reading frame 76
CAPS	calcyphosine
PRR18	proline rich 18
LARGE	like-glycosyltransferase
NFIC	nuclear factor I/C (CCAAT-binding transcription factor)
COPS7B	COP9 signalosome subunit 7B
HAPLN4	hyaluronan and proteoglycan link protein 4
SAMD12	sterile alpha motif domain containing 12
PDE8A	phosphodiesterase 8A
TRAPPC10	trafficking protein particle complex 10
NKAIN3	Na+/K+ transporting ATPase interacting 3
KRTAP17-1	keratin associated protein 17-1
ARHGAP19	Rho GTPase activating protein 19
C13orf35	chromosome 13 open reading frame 35
C1orf158	chromosome 1 open reading frame 158
FCRL6	Fc receptor-like 6
FLJ00388
GPR56	G protein-coupled receptor 56
ROR2	receptor tyrosine kinase-like orphan receptor 2
DHX33	DEAH (Asp-Glu-Ala-His) box polypeptide 33
TNFRSF13C	tumor necrosis factor receptor superfamily, member 13C
ARHGEF19	Rho guanine nucleotide exchange factor (GEF) 19
COL6A6	collagen, type VI, alpha 6
PXDC1	PX domain containing 1
SGPP1	sphingosine-1-phosphate phosphatase 1
ABCF3	ATP-binding cassette, sub-family F (GCN20), member 3
TRAPPC6B	trafficking protein particle complex 6B
GPRIN2	G protein regulated inducer of neurite outgrowth 2
DUSP22	dual specificity phosphatase 22
ZC3HAV1	zinc finger CCCH-type, antiviral 1
CPNE3	copine III
THRB	thyroid hormone receptor, beta
HFE	hemochromatosis
STAT2	signal transducer and activator of transcription 2, 113kDa
ARHGAP33	Rho GTPase activating protein 33
PSMA5	proteasome (prosome, macropain) subunit, alpha type, 5
ASB1	ankyrin repeat and SOCS box containing 1
GJA5	gap junction protein, alpha 5, 40kDa
ART5	ADP-ribosyltransferase 5
CHST11	carbohydrate (chondroitin 4) sulfotransferase 11
ARHGEF37	Rho guanine nucleotide exchange factor (GEF) 37
FAM78A	family with sequence similarity 78, member A
ETV4	ets variant 4
TMEM2	transmembrane protein 2
PPAN-P2RY11	PPAN-P2RY11 readthrough
INTU	inturned planar cell polarity protein
ORMDL1	ORM1-like 1 (S. cerevisiae)
IL7R	interleukin 7 receptor
HTR5A-AS1	HTR5A antisense RNA 1
SIPA1L3	signal-induced proliferation-associated 1 like 3
XPO6	exportin 6
MTNR1B	melatonin receptor 1B
C2orf72	chromosome 2 open reading frame 72
NDUFA5	NADH dehydrogenase (ubiquinone) 1 alpha subcomplex, 5
PROB1	proline-rich basic protein 1
TBL3	transducin (beta)-like 3
PHF16	PHD finger protein 16
RAC2	ras-related C3 botulinum toxin substrate 2 (rho family, small GTP binding protein Rac2)
CDK10	cyclin-dependent kinase 10
ARL4C	ADP-ribosylation factor-like 4C
CBX5	chromobox homolog 5
RBFOX2	RNA binding protein, fox-1 homolog (C. elegans) 2
EXTL1	exostosin-like glycosyltransferase 1
PPM1L	protein phosphatase, Mg2+/Mn2+ dependent, 1L
DUOX2	dual oxidase 2
KDM2B	lysine (K)-specific demethylase 2B
SLC8A3	solute carrier family 8 (sodium/calcium exchanger), member 3
ST6GALNAC6	ST6 (alpha-N-acetyl-neuraminyl-2,3-beta-galactosyl-1,3)-N-acetylgalactosaminide alpha-2,6-sialyltransferase 6
MAPK4	mitogen-activated protein kinase 4
VKORC1L1	vitamin K epoxide reductase complex, subunit 1-like 1
ESCO2	establishment of sister chromatid cohesion N-acetyltransferase 2
NACC2	NACC family member 2, BEN and BTB (POZ) domain containing
ORAI2	ORAI calcium release-activated calcium modulator 2
PROX2	prospero homeobox 2
TGM2	transglutaminase 2
ZSCAN1	zinc finger and SCAN domain containing 1
TMEM184B	transmembrane protein 184B
RDX	radixin
ZC4H2	zinc finger, C4H2 domain containing
MRGBP	MRG/MORF4L binding protein
C10orf54	chromosome 10 open reading frame 54
MLLT11	myeloid/lymphoid or mixed-lineage leukemia (trithorax homolog, Drosophila); translocated to, 11
C10orf55	chromosome 10 open reading frame 55
AC000003.2	CDNA FLJ25865 fis, clone CBR01927
USP54	ubiquitin specific peptidase 54
SAMD4A	sterile alpha motif domain containing 4A
PTBP1	polypyrimidine tract binding protein 1
GPR161	G protein-coupled receptor 161
HMX1	H6 family homeobox 1
PPM1B	protein phosphatase, Mg2+/Mn2+ dependent, 1B
KLK3	kallikrein-related peptidase 3
STAC2	SH3 and cysteine rich domain 2
SRRM4	serine/arginine repetitive matrix 4
GRM5	glutamate receptor, metabotropic 5
SGSM2	small G protein signaling modulator 2
RAB3GAP2	RAB3 GTPase activating protein subunit 2 (non-catalytic)
CKS1B	CDC28 protein kinase regulatory subunit 1B
PTCHD2	patched domain containing 2
IPMK	inositol polyphosphate multikinase
ANKDD1B	ankyrin repeat and death domain containing 1B
PAMR1	peptidase domain containing associated with muscle regeneration 1
ENTPD4	ectonucleoside triphosphate diphosphohydrolase 4
TTYH1	tweety family member 1
TRIM9	tripartite motif containing 9
IRGQ	immunity-related GTPase family, Q
KIAA1199	KIAA1199
RNF112	ring finger protein 112
DUSP13	dual specificity phosphatase 13
CCND2	cyclin D2
EXOC5	exocyst complex component 5
SAP30L	SAP30-like
FAM8A1	family with sequence similarity 8, member A1
SNX30	sorting nexin family member 30
SPTBN4	spectrin, beta, non-erythrocytic 4
ZSWIM3	zinc finger, SWIM-type containing 3
WBSCR16	Williams-Beuren syndrome chromosome region 16
ZFP41	ZFP41 zinc finger protein
PTPRS	protein tyrosine phosphatase, receptor type, S
CHST9	carbohydrate (N-acetylgalactosamine 4-0) sulfotransferase 9
ENPEP	glutamyl aminopeptidase (aminopeptidase A)
CCR6	chemokine (C-C motif) receptor 6
SSBP3	single stranded DNA binding protein 3
XCR1	chemokine (C motif) receptor 1
ADAMTSL1	ADAMTS-like 1
BEND6	BEN domain containing 6
MEX3C	mex-3 RNA binding family member C
AC007040.11
RAB5C	RAB5C, member RAS oncogene family
PBRM1	polybromo 1
FLNB	filamin B, beta
WDR43	WD repeat domain 43
VHL	von Hippel-Lindau tumor suppressor, E3 ubiquitin protein ligase
TXNRD3NB	thioredoxin reductase 3 neighbor
STRN3	striatin, calmodulin binding protein 3
GPIHBP1	glycosylphosphatidylinositol anchored high density lipoprotein binding protein 1
ISY1-RAB43	ISY1-RAB43 readthrough
HOXC11	homeobox C11
LMLN	leishmanolysin-like (metallopeptidase M8 family)
SLC10A2	solute carrier family 10 (sodium/bile acid cotransporter), member 2
NAIP	NLR family, apoptosis inhibitory protein
NAGS	N-acetylglutamate synthase
SOGA3	SOGA family member 3
FSTL4	follistatin-like 4
GEMIN6	gem (nuclear organelle) associated protein 6
DGKQ	diacylglycerol kinase, theta 110kDa
TRMT2A	tRNA methyltransferase 2 homolog A (S. cerevisiae)
AL117190.3	Esophagus cancer-related gene-2 interaction susceptibility protein; Uncharacterized protein
GPKOW	G patch domain and KOW motifs
SORBS3	sorbin and SH3 domain containing 3
BTBD7	BTB (POZ) domain containing 7
AKAP5	A kinase (PRKA) anchor protein 5
MTMR12	myotubularin related protein 12
SCTR	secretin receptor
SLC8A2	solute carrier family 8 (sodium/calcium exchanger), member 2
FAM110D	family with sequence similarity 110, member D
TBC1D13	TBC1 domain family, member 13
ABCB8	ATP-binding cassette, sub-family B (MDR/TAP), member 8
AP005482.1	Uncharacterized protein
GNL3L	guanine nucleotide binding protein-like 3 (nucleolar)-like
DPF2	D4, zinc and double PHD fingers family 2
NFATC2	nuclear factor of activated T-cells, cytoplasmic, calcineurin-dependent 2
TRIM71	tripartite motif containing 71, E3 ubiquitin protein ligase
NR2F1	nuclear receptor subfamily 2, group F, member 1
EDNRB	endothelin receptor type B
AGPAT9	1-acylglycerol-3-phosphate O-acyltransferase 9
YPEL2	yippee-like 2 (Drosophila)
CREB3L2	cAMP responsive element binding protein 3-like 2
SLC35B3	solute carrier family 35 (adenosine 3'-phospho 5'-phosphosulfate transporter), member B3
ARHGAP19-SLIT1	ARHGAP19-SLIT1 readthrough (NMD candidate)
ANKRD13C	ankyrin repeat domain 13C
SH3RF3	SH3 domain containing ring finger 3
DOHH	deoxyhypusine hydroxylase/monooxygenase
PPIL2	peptidylprolyl isomerase (cyclophilin)-like 2
SCG3	secretogranin III
TMCC3	transmembrane and coiled-coil domain family 3
NXPE3	neurexophilin and PC-esterase domain family, member 3
LZTS2	leucine zipper, putative tumor suppressor 2
CYS1	cystin 1
BCAS1	breast carcinoma amplified sequence 1
KIAA0319	KIAA0319
SMG9	SMG9 nonsense mediated mRNA decay factor
TRPC3	transient receptor potential cation channel, subfamily C, member 3
RXRB	retinoid X receptor, beta
RRP36	ribosomal RNA processing 36 homolog (S. cerevisiae)
BAP1	BRCA1 associated protein-1 (ubiquitin carboxy-terminal hydrolase)
NTNG2	netrin G2
PALM	paralemmin
HOXD4	homeobox D4
ATP2A1	ATPase, Ca++ transporting, cardiac muscle, fast twitch 1
UVRAG	UV radiation resistance associated
SBNO1	strawberry notch homolog 1 (Drosophila)
VPS36	vacuolar protein sorting 36 homolog (S. cerevisiae)
KRT85	keratin 85
MFI2	antigen p97 (melanoma associated) identified by monoclonal antibodies 133.2 and 96.5
SDC1	syndecan 1
FAM83G	family with sequence similarity 83, member G
GRHL2	grainyhead-like 2 (Drosophila)
RIMBP2	RIMS binding protein 2
PRKCB	protein kinase C, beta
ZNF75D	zinc finger protein 75D
ALS2	amyotrophic lateral sclerosis 2 (juvenile)
SMARCD1	SWI/SNF related, matrix associated, actin dependent regulator of chromatin, subfamily d, member 1
SLC46A1	solute carrier family 46 (folate transporter), member 1
IFFO1	intermediate filament family orphan 1
IQGAP2	IQ motif containing GTPase activating protein 2
ITGA9	integrin, alpha 9
SYK	spleen tyrosine kinase
IYD	iodotyrosine deiodinase
MAP3K9	mitogen-activated protein kinase kinase kinase 9
NDE1	nudE neurodevelopment protein 1
HPSE2	heparanase 2
CBS	cystathionine-beta-synthase
AQP7	aquaporin 7
PRRC2B	proline-rich coiled-coil 2B
AJAP1	adherens junctions associated protein 1
ANKRD46	ankyrin repeat domain 46
SEMA6D	sema domain, transmembrane domain (TM), and cytoplasmic domain, (semaphorin) 6D
RAD54L2	RAD54-like 2 (S. cerevisiae)
TARSL2	threonyl-tRNA synthetase-like 2
DNAJC18	DnaJ (Hsp40) homolog, subfamily C, member 18
SLC17A1	solute carrier family 17 (organic anion transporter), member 1
DENND6B	DENN/MADD domain containing 6B
TTC7A	tetratricopeptide repeat domain 7A
RGS9BP	regulator of G protein signaling 9 binding protein
EGFLAM	EGF-like, fibronectin type III and laminin G domains
PRKAR2A	protein kinase, cAMP-dependent, regulatory, type II, alpha
KDM8	lysine (K)-specific demethylase 8
PODN	podocan
AMN	amnion associated transmembrane protein
TMEM164	transmembrane protein 164
ELFN1	extracellular leucine-rich repeat and fibronectin type III domain containing 1
SYNPO	synaptopodin
TRPM3	transient receptor potential cation channel, subfamily M, member 3
GPN1	GPN-loop GTPase 1
ZBTB7A	zinc finger and BTB domain containing 7A
FAM104A	family with sequence similarity 104, member A
HMGCS1	3-hydroxy-3-methylglutaryl-CoA synthase 1 (soluble)
CPT1A	carnitine palmitoyltransferase 1A (liver)
TMEM184C	transmembrane protein 184C
KLF8	Kruppel-like factor 8
STAU1	staufen double-stranded RNA binding protein 1
VSTM2L	V-set and transmembrane domain containing 2 like
MYH7B	myosin, heavy chain 7B, cardiac muscle, beta
CDC40	cell division cycle 40
NDST1	N-deacetylase/N-sulfotransferase (heparan glucosaminyl) 1
CDC42BPB	CDC42 binding protein kinase beta (DMPK-like)
TBC1D2B	TBC1 domain family, member 2B
BNIP3	BCL2/adenovirus E1B 19kDa interacting protein 3
GPR180	G protein-coupled receptor 180
TAF12	TAF12 RNA polymerase II, TATA box binding protein (TBP)-associated factor, 20kDa
NT5C1A	5'-nucleotidase, cytosolic IA
Z98049.1	CDNA FLJ25492 fis, clone CBR01389; Uncharacterized protein
STIM1	stromal interaction molecule 1
TMEM127	transmembrane protein 127
PRRG3	proline rich Gla (G-carboxyglutamic acid) 3 (transmembrane)
SYPL2	synaptophysin-like 2
VAMP8	vesicle-associated membrane protein 8
MTUS2	microtubule associated tumor suppressor candidate 2
BCL6B	B-cell CLL/lymphoma 6, member B
IDI1	isopentenyl-diphosphate delta isomerase 1
ZNF772	zinc finger protein 772
GPR20	G protein-coupled receptor 20
CLIP1	CAP-GLY domain containing linker protein 1
ZNF354C	zinc finger protein 354C
TEKT1	tektin 1
SAMD5	sterile alpha motif domain containing 5
B3GNT9	UDP-GlcNAc:betaGal beta-1,3-N-acetylglucosaminyltransferase 9
ARID4A	AT rich interactive domain 4A (RBP1-like)
PGS1	phosphatidylglycerophosphate synthase 1
NUMBL	numb homolog (Drosophila)-like
FOXI2	forkhead box I2
CRISPLD2	cysteine-rich secretory protein LCCL domain containing 2
CDH7	cadherin 7, type 2
FNIP2	folliculin interacting protein 2
ZDHHC14	zinc finger, DHHC-type containing 14
ESPNL	espin-like
SCAMP4	secretory carrier membrane protein 4
PLIN4	perilipin 4
CREG1	cellular repressor of E1A-stimulated genes 1
METAP1D	methionyl aminopeptidase type 1D (mitochondrial)
BTC	betacellulin
ADAMTS10	ADAM metallopeptidase with thrombospondin type 1 motif, 10
NTN1	netrin 1
SLC17A8	solute carrier family 17 (vesicular glutamate transporter), member 8
ZNF2	zinc finger protein 2
LMOD3	leiomodin 3 (fetal)
ABCA2	ATP-binding cassette, sub-family A (ABC1), member 2
LRRC14B	leucine rich repeat containing 14B
GRAMD2	GRAM domain containing 2
GINS2	GINS complex subunit 2 (Psf2 homolog)
KLHL3	kelch-like family member 3
ITGA11	integrin, alpha 11
USP20	ubiquitin specific peptidase 20
KMT2C	lysine (K)-specific methyltransferase 2C
MSR1	macrophage scavenger receptor 1
RNFT2	ring finger protein, transmembrane 2
AC010536.1	Uncharacterized protein; cDNA FLJ45526 fis, clone BRTHA2027227
EMCN	endomucin
MOGS	mannosyl-oligosaccharide glucosidase
TINAGL1	tubulointerstitial nephritis antigen-like 1
FAXDC2	fatty acid hydroxylase domain containing 2
ZNF189	zinc finger protein 189
NOL10	nucleolar protein 10
MYCBP	MYC binding protein
C2orf82	chromosome 2 open reading frame 82
ZNF596	zinc finger protein 596
AARS2	alanyl-tRNA synthetase 2, mitochondrial
NHLRC3	NHL repeat containing 3
ACER2	alkaline ceramidase 2
VSNL1	visinin-like 1
RCC1	regulator of chromosome condensation 1
PLEKHA6	pleckstrin homology domain containing, family A member 6
SLC22A7	solute carrier family 22 (organic anion transporter), member 7
C14orf105	chromosome 14 open reading frame 105
VPS9D1	VPS9 domain containing 1
SSTR3	somatostatin receptor 3
RBM41	RNA binding motif protein 41
RNASEH1	ribonuclease H1
MRPL35	mitochondrial ribosomal protein L35
TTBK2	tau tubulin kinase 2
GPALPP1	GPALPP motifs containing 1
NPFFR1	neuropeptide FF receptor 1
CIITA	class II, major histocompatibility complex, transactivator
RABL2A	RAB, member of RAS oncogene family-like 2A
RABL2B	RAB, member of RAS oncogene family-like 2B
CD244	CD244 molecule, natural killer cell receptor 2B4
SLC35A2	solute carrier family 35 (UDP-galactose transporter), member A2
SEC16A	SEC16 homolog A (S. cerevisiae)
SVOP	SV2 related protein homolog (rat)
FCRL5	Fc receptor-like 5
STRIP1	striatin interacting protein 1
DNAL1	dynein, axonemal, light chain 1
ADAT2	adenosine deaminase, tRNA-specific 2
MPP7	membrane protein, palmitoylated 7 (MAGUK p55 subfamily member 7)
AIF1L	allograft inflammatory factor 1-like
PLXNA4	plexin A4
SLC1A2	solute carrier family 1 (glial high affinity glutamate transporter), member 2
NCKAP5L	NCK-associated protein 5-like
USP33	ubiquitin specific peptidase 33
INHBB	inhibin, beta B
KIAA1614	KIAA1614
ALDH1A2	aldehyde dehydrogenase 1 family, member A2
AKAP2	A kinase (PRKA) anchor protein 2
SYT7	synaptotagmin VII
NRIP3	nuclear receptor interacting protein 3
KIAA1522	KIAA1522
PCSK7	proprotein convertase subtilisin/kexin type 7
CNR1	cannabinoid receptor 1 (brain)
GABRA2	gamma-aminobutyric acid (GABA) A receptor, alpha 2
PIP4K2C	phosphatidylinositol-5-phosphate 4-kinase, type II, gamma
ALG1	ALG1, chitobiosyldiphosphodolichol beta-mannosyltransferase
PTK6	protein tyrosine kinase 6
NR3C1	nuclear receptor subfamily 3, group C, member 1 (glucocorticoid receptor)
RAB14	RAB14, member RAS oncogene family
NUMA1	nuclear mitotic apparatus protein 1
SLC13A2	solute carrier family 13 (sodium-dependent dicarboxylate transporter), member 2
WNT2B	wingless-type MMTV integration site family, member 2B
ZNF852	zinc finger protein 852
PAG1	phosphoprotein associated with glycosphingolipid microdomains 1
MTR	5-methyltetrahydrofolate-homocysteine methyltransferase
ELMSAN1	ELM2 and Myb/SANT-like domain containing 1
PBX1	pre-B-cell leukemia homeobox 1
RNASEH2C	ribonuclease H2, subunit C
EXOC7	exocyst complex component 7
RP11-47I22.4
C19orf12	chromosome 19 open reading frame 12
APOC3	apolipoprotein C-III
JAZF1	JAZF zinc finger 1
IGF2	insulin-like growth factor 2 (somatomedin A)
LPGAT1	lysophosphatidylglycerol acyltransferase 1
RBM47	RNA binding motif protein 47
C19orf48	chromosome 19 open reading frame 48
FAM219B	family with sequence similarity 219, member B
PCGF3	polycomb group ring finger 3
MKNK2	MAP kinase interacting serine/threonine kinase 2
INSR	insulin receptor
SPIN3	spindlin family, member 3
KIF3B	kinesin family member 3B
ALDH4A1	aldehyde dehydrogenase 4 family, member A1
TMEM229B	transmembrane protein 229B
TNPO2	transportin 2
CACNG1	calcium channel, voltage-dependent, gamma subunit 1
LEPROT	leptin receptor overlapping transcript
PLCL1	phospholipase C-like 1
C8orf37	chromosome 8 open reading frame 37
AIFM2	apoptosis-inducing factor, mitochondrion-associated, 2
MSRB3	methionine sulfoxide reductase B3
REEP4	receptor accessory protein 4
PPAPDC3	phosphatidic acid phosphatase type 2 domain containing 3
PRPF3	pre-mRNA processing factor 3
PALM2-AKAP2	PALM2-AKAP2 readthrough
NOP9	NOP9 nucleolar protein
SLC25A36	solute carrier family 25 (pyrimidine nucleotide carrier ), member 36
SUPT6H	suppressor of Ty 6 homolog (S. cerevisiae)
ZNF207	zinc finger protein 207
GRK6	G protein-coupled receptor kinase 6
NOD2	nucleotide-binding oligomerization domain containing 2
SMYD1	SET and MYND domain containing 1
CCDC8	coiled-coil domain containing 8
AQP2	aquaporin 2 (collecting duct)
CAMKK2	calcium/calmodulin-dependent protein kinase kinase 2, beta
TTC14	tetratricopeptide repeat domain 14
SPATA17	spermatogenesis associated 17
CBX7	chromobox homolog 7
IQSEC1	IQ motif and Sec7 domain 1
MAP10	microtubule-associated protein 10
AP000708.1
SYNPO2L	synaptopodin 2-like
ZNF81	zinc finger protein 81
FAM178A	family with sequence similarity 178, member A
LIX1L	Lix1 homolog (mouse)-like
C20orf112	chromosome 20 open reading frame 112
C9orf69	chromosome 9 open reading frame 69
TMEM214	transmembrane protein 214
SUN2	Sad1 and UNC84 domain containing 2
ST6GALNAC3	ST6 (alpha-N-acetyl-neuraminyl-2,3-beta-galactosyl-1,3)-N-acetylgalactosaminide alpha-2,6-sialyltransferase 3
DCTN5	dynactin 5 (p25)
PHF13	PHD finger protein 13
LONRF2	LON peptidase N-terminal domain and ring finger 2
ICOSLG	inducible T-cell co-stimulator ligand
CCDC97	coiled-coil domain containing 97
RAB11FIP5	RAB11 family interacting protein 5 (class I)
VANGL2	VANGL planar cell polarity protein 2
HLA-DQB1	major histocompatibility complex, class II, DQ beta 1
TSPAN33	tetraspanin 33
ZFAND3	zinc finger, AN1-type domain 3
RXRA	retinoid X receptor, alpha
LANCL3	LanC lantibiotic synthetase component C-like 3 (bacterial)
CRHR1	corticotropin releasing hormone receptor 1
MGAT3	mannosyl (beta-1,4-)-glycoprotein beta-1,4-N-acetylglucosaminyltransferase
AOC3	amine oxidase, copper containing 3
SMAD1	SMAD family member 1
REEP3	receptor accessory protein 3
MYOCD	myocardin
ATP6V1C2	ATPase, H+ transporting, lysosomal 42kDa, V1 subunit C2
CD300E	CD300e molecule
ABHD2	abhydrolase domain containing 2
ARFGAP1	ADP-ribosylation factor GTPase activating protein 1
ABI1	abl-interactor 1
SLITRK6	SLIT and NTRK-like family, member 6
RNF19B	ring finger protein 19B
ZFYVE9	zinc finger, FYVE domain containing 9
CD4	CD4 molecule
SELT	Selenoprotein T
LUC7L3	LUC7-like 3 (S. cerevisiae)
PARVB	parvin, beta
ATP6V0A2	ATPase, H+ transporting, lysosomal V0 subunit a2
KDM4B	lysine (K)-specific demethylase 4B
AHRR	aryl-hydrocarbon receptor repressor
CD109	CD109 molecule
POGK	pogo transposable element with KRAB domain
SPTBN2	spectrin, beta, non-erythrocytic 2
RPL37	ribosomal protein L37
DLX3	distal-less homeobox 3
FAM135B	family with sequence similarity 135, member B
THAP8	THAP domain containing 8
SLC46A3	solute carrier family 46, member 3
FAM57A	family with sequence similarity 57, member A
VCL	vinculin
ARFGEF2	ADP-ribosylation factor guanine nucleotide-exchange factor 2 (brefeldin A-inhibited)
TANGO2	transport and golgi organization 2 homolog (Drosophila)
BCORL1	BCL6 corepressor-like 1
HIC2	hypermethylated in cancer 2
SCAND3	SCAN domain containing 3
KCTD21	potassium channel tetramerization domain containing 21
NFASC	neurofascin
ARHGAP20	Rho GTPase activating protein 20
SUCO	SUN domain containing ossification factor
KCNA7	potassium voltage-gated channel, shaker-related subfamily, member 7
SLC12A3	solute carrier family 12 (sodium/chloride transporter), member 3
GSK3B	glycogen synthase kinase 3 beta
IGFBP5	insulin-like growth factor binding protein 5
POLR3H	polymerase (RNA) III (DNA directed) polypeptide H (22.9kD)
NAGA	N-acetylgalactosaminidase, alpha-
ACSF3	acyl-CoA synthetase family member 3
STRN	striatin, calmodulin binding protein
FCRL4	Fc receptor-like 4
KIAA1875	KIAA1875
RTCB	RNA 2',3'-cyclic phosphate and 5'-OH ligase
NEK9	NIMA-related kinase 9
B3GNT4	UDP-GlcNAc:betaGal beta-1,3-N-acetylglucosaminyltransferase 4
LMNB2	lamin B2
C20orf194	chromosome 20 open reading frame 194
MEF2A	myocyte enhancer factor 2A
LENG1	leukocyte receptor cluster (LRC) member 1
AIFM1	apoptosis-inducing factor, mitochondrion-associated, 1
ST3GAL1	ST3 beta-galactoside alpha-2,3-sialyltransferase 1
PDGFRB	platelet-derived growth factor receptor, beta polypeptide
MFN2	mitofusin 2
ARHGAP27	Rho GTPase activating protein 27
PHB2	prohibitin 2
HECW1	HECT, C2 and WW domain containing E3 ubiquitin protein ligase 1
PAPLN	papilin, proteoglycan-like sulfated glycoprotein
ELL2	elongation factor, RNA polymerase II, 2
PICALM	phosphatidylinositol binding clathrin assembly protein
C4orf19	chromosome 4 open reading frame 19
RASL10A	RAS-like, family 10, member A
SORL1	sortilin-related receptor, L(DLR class) A repeats containing
PPM1E	protein phosphatase, Mg2+/Mn2+ dependent, 1E
NOC3L	nucleolar complex associated 3 homolog (S. cerevisiae)
ZC3H11A	zinc finger CCCH-type containing 11A
TOM1L2	target of myb1-like 2 (chicken)
PPCDC	phosphopantothenoylcysteine decarboxylase
C4orf50	chromosome 4 open reading frame 50
ITFG3	integrin alpha FG-GAP repeat containing 3
SH2B3	SH2B adaptor protein 3
CHSY1	chondroitin sulfate synthase 1
RFX7	regulatory factor X, 7
UBE2G1	ubiquitin-conjugating enzyme E2G 1
COL18A1	collagen, type XVIII, alpha 1
CD1D	CD1d molecule
CCDC134	coiled-coil domain containing 134
CDH12	cadherin 12, type 2 (N-cadherin 2)
C21orf128	chromosome 21 open reading frame 128
GLP2R	glucagon-like peptide 2 receptor
TMEM178B	transmembrane protein 178B
OXER1	oxoeicosanoid (OXE) receptor 1
TM9SF4	transmembrane 9 superfamily protein member 4
CLSTN2	calsyntenin 2
NUCB2	nucleobindin 2
HNF4A	hepatocyte nuclear factor 4, alpha
PXN	paxillin
MRC2	mannose receptor, C type 2
GTF3C1	general transcription factor IIIC, polypeptide 1, alpha 220kDa
FRMD5	FERM domain containing 5
SYT6	synaptotagmin VI
SKI	v-ski avian sarcoma viral oncogene homolog
GM2A	GM2 ganglioside activator
ZSWIM6	zinc finger, SWIM-type containing 6
LSG1	large 60S subunit nuclear export GTPase 1
EIF2B5	eukaryotic translation initiation factor 2B, subunit 5 epsilon, 82kDa
FNDC5	fibronectin type III domain containing 5
SUPT16H	suppressor of Ty 16 homolog (S. cerevisiae)
ANKRD33B	ankyrin repeat domain 33B
SORCS2	sortilin-related VPS10 domain containing receptor 2
PTPRT	protein tyrosine phosphatase, receptor type, T
RTN4RL1	reticulon 4 receptor-like 1
TP53I11	tumor protein p53 inducible protein 11
MSANTD3	Myb/SANT-like DNA-binding domain containing 3
SDAD1	SDA1 domain containing 1
CD44	CD44 molecule (Indian blood group)
ERO1LB	ERO1-like beta (S. cerevisiae)
BCL2	B-cell CLL/lymphoma 2
TBX3	T-box 3
TNRC6B	trinucleotide repeat containing 6B
CUX2	cut-like homeobox 2
RDH13	retinol dehydrogenase 13 (all-trans/9-cis)
SNPH	syntaphilin
SFRP4	secreted frizzled-related protein 4
EPN3	epsin 3
GRIA1	glutamate receptor, ionotropic, AMPA 1
KCTD18	potassium channel tetramerization domain containing 18
KCNH8	potassium voltage-gated channel, subfamily H (eag-related), member 8
DLGAP4	discs, large (Drosophila) homolog-associated protein 4
SCN2B	sodium channel, voltage-gated, type II, beta subunit
TNPO1	transportin 1
RCAN3	RCAN family member 3
MEX3A	mex-3 RNA binding family member A
SMC1A	structural maintenance of chromosomes 1A
ONECUT3	one cut homeobox 3
RNMT	RNA (guanine-7-) methyltransferase
NDNL2	necdin-like 2
ADH1B	alcohol dehydrogenase 1B (class I), beta polypeptide
OLFM4	olfactomedin 4
CNTF	ciliary neurotrophic factor
RIT1	Ras-like without CAAX 1
IRAK4	interleukin-1 receptor-associated kinase 4
BYSL	bystin-like
KIAA0247	KIAA0247
APC2	adenomatosis polyposis coli 2
MCC	mutated in colorectal cancers
NLE1	notchless homolog 1 (Drosophila)
EIF2AK4	eukaryotic translation initiation factor 2 alpha kinase 4
PRRT3	proline-rich transmembrane protein 3
CPLX2	complexin 2
KCNN1	potassium intermediate/small conductance calcium-activated channel, subfamily N, member 1
NPY4R	neuropeptide Y receptor Y4
ZNF697	zinc finger protein 697
HGSNAT	heparan-alpha-glucosaminide N-acetyltransferase
HIP1	huntingtin interacting protein 1
TNFRSF25	tumor necrosis factor receptor superfamily, member 25
ADAM23	ADAM metallopeptidase domain 23
RGPD1	RANBP2-like and GRIP domain containing 1
ZEB2	zinc finger E-box binding homeobox 2
ATP8A1	ATPase, aminophospholipid transporter (APLT), class I, type 8A, member 1
ZNF770	zinc finger protein 770
ZNF275	zinc finger protein 275
CTDSP2	CTD (carboxy-terminal domain, RNA polymerase II, polypeptide A) small phosphatase 2
CABLES1	Cdk5 and Abl enzyme substrate 1
KPNA1	karyopherin alpha 1 (importin alpha 5)
ATHL1	ATH1, acid trehalase-like 1 (yeast)
IL1RAPL1	interleukin 1 receptor accessory protein-like 1
LRRC3C	leucine rich repeat containing 3C
AMER1	APC membrane recruitment protein 1
MT1A	metallothionein 1A
UQCRFS1	ubiquinol-cytochrome c reductase, Rieske iron-sulfur polypeptide 1
NPLOC4	nuclear protein localization 4 homolog (S. cerevisiae)
UNC13A	unc-13 homolog A (C. elegans)
SYNDIG1L	synapse differentiation inducing 1-like
KCNIP4	Kv channel interacting protein 4
ZNF319	zinc finger protein 319
CHTF8	CTF8, chromosome transmission fidelity factor 8 homolog (S. cerevisiae)
PDZD2	PDZ domain containing 2
BCL2L2	BCL2-like 2
PDE7A	phosphodiesterase 7A
HLA-DOA	major histocompatibility complex, class II, DO alpha
ZNF320	zinc finger protein 320
CAPZB	capping protein (actin filament) muscle Z-line, beta
SFXN5	sideroflexin 5
GATAD2B	GATA zinc finger domain containing 2B
FAM53C	family with sequence similarity 53, member C
MURC	muscle-related coiled-coil protein
NOVA2	neuro-oncological ventral antigen 2
EDA	ectodysplasin A
RAB11FIP1	RAB11 family interacting protein 1 (class I)
PCYT1B	phosphate cytidylyltransferase 1, choline, beta
KDM1B	lysine (K)-specific demethylase 1B
LPIN2	lipin 2
DNAJA3	DnaJ (Hsp40) homolog, subfamily A, member 3
PPP1CB	protein phosphatase 1, catalytic subunit, beta isozyme
NDST3	N-deacetylase/N-sulfotransferase (heparan glucosaminyl) 3
PHF15	PHD finger protein 15
ELK4	ELK4, ETS-domain protein (SRF accessory protein 1)
CGREF1	cell growth regulator with EF-hand domain 1
TPST2	tyrosylprotein sulfotransferase 2
MAOA	monoamine oxidase A
BCAT1	branched chain amino-acid transaminase 1, cytosolic
UBXN10	UBX domain protein 10
ZNF783	zinc finger family member 783
[truncated: 1,350 more rows]

## Sheet: (D) mml-miR-1262-5p
mml-miR-1262-5p Predicted Target Genes	Full Gene Name	mRNAs Evaluated
GAS1	growth arrest-specific 1	AIMP1
CDH7	cadherin 7, type 2	BMP2
IFNA8	interferon, alpha 8	CCL1
TMSB10	thymosin beta 10	CCL11
ABRACL	ABRA C-terminal like	CCL13
XPA	xeroderma pigmentosum, complementation group A	CCL17
PRTG	protogenin	CCL2
CCL7	chemokine (C-C motif) ligand 7	CCL20
REXO2	RNA exonuclease 2	CCL23
ASCL1	achaete-scute complex homolog 1 (Drosophila)	CCL5
ARL4A	ADP-ribosylation factor-like 4A	CCR1
IL22	interleukin 22	CCR3
RFPL2	ret finger protein-like 2	CCR4
RP11-159G9.5	Uncharacterized protein	CCR6
CLEC2A	C-type lectin domain family 2, member A	CCR8
RARRES1	retinoic acid receptor responder (tazarotene induced) 1	CD40LG
C3orf55	chromosome 3 open reading frame 55	CD70
RFPL3	ret finger protein-like 3	CSF1
ABCB1	ATP-binding cassette, sub-family B (MDR/TAP), member 1	CSF2
CXCL1	chemokine (C-X-C motif) ligand 1 (melanoma growth stimulating activity, alpha)	CX3CL1
FGF9	fibroblast growth factor 9	CX3CR1
PDZD11	PDZ domain containing 11	CXCL11
AL627171.2	HCG1786899; PRO2610; Uncharacterized protein	CXCL12
GTSF1	gametocyte specific factor 1	CXCL13
LXN	latexin	CXCL6
NUP62CL	nucleoporin 62kDa C-terminal like	CXCL9
TAS2R1	taste receptor, type 2, member 1	CXCR1
CH25H	cholesterol 25-hydroxylase	CXCR4
ATP6AP1L	ATPase, H+ transporting, lysosomal accessory protein 1-like	FASLG
CCL1	chemokine (C-C motif) ligand 1	IFNA2
METTL10	methyltransferase like 10	IFNG
ANXA2R	annexin A2 receptor	IL10RA
GREM2	gremlin 2, DAN family BMP antagonist	IL10RB
ASPH	aspartate beta-hydroxylase	IL11RA
SYF2	SYF2 pre-mRNA-splicing factor	IL12B
DNAJC5B	DnaJ (Hsp40) homolog, subfamily C, member 5 beta	IL12RB1
RAB21	RAB21, member RAS oncogene family	IL12RB2
C12orf4	chromosome 12 open reading frame 4	IL13
MASTL	microtubule associated serine/threonine kinase-like	IL15
NDUFB5	NADH dehydrogenase (ubiquinone) 1 beta subcomplex, 5, 16kDa	IL15RA
MEX3C	mex-3 RNA binding family member C	IL16
BTG1	B-cell translocation gene 1, anti-proliferative	IL17A
BAMBI	BMP and activin membrane-bound inhibitor	IL17F
BTG3	BTG family, member 3	IL1A
MIB1	mindbomb E3 ubiquitin protein ligase 1	IL1B
TRPC1	transient receptor potential cation channel, subfamily C, member 1	IL1R1
CENPL	centromere protein L	IL1R2
THAP1	THAP domain containing, apoptosis associated protein 1	IL1RN
NRROS	negative regulator of reactive oxygen species	IL2
FBXO16	F-box protein 16	IL20
PABPC1L2B	poly(A) binding protein, cytoplasmic 1-like 2B	IL21
TFRC	transferrin receptor	IL2RA
TMEM167A	transmembrane protein 167A	IL2RB
KRTAP4-3	keratin associated protein 4-3	IL2RG
MDM4	Mdm4 p53 binding protein homolog (mouse)	IL3
RP11-1026M7.2	Uncharacterized protein	IL4
FOXD4L5	forkhead box D4-like 5	IL5
TAGLN3	transgelin 3	IL5RA
TUSC3	tumor suppressor candidate 3	IL6
ARL15	ADP-ribosylation factor-like 15	IL6R
NBPF24	neuroblastoma breakpoint family, member 24	IL7
MTHFD2L	methylenetetrahydrofolate dehydrogenase (NADP+ dependent) 2-like	CXCL8
SRSF10	serine/arginine-rich splicing factor 10	CXCR2
RP11-382J12.1	Uncharacterized protein	IL9R
ZNF678	zinc finger protein 678	IL13RA2
TWF1	twinfilin actin-binding protein 1	LOC710618
DNAJC12	DnaJ (Hsp40) homolog, subfamily C, member 12	IL9
ABRA	actin-binding Rho activating protein	CCL7
TAGAP	T-cell activation RhoGTPase activating protein	CCL26
TMEM233	transmembrane protein 233	LTA
ZNF540	zinc finger protein 540	MIF
XCL1	chemokine (C motif) ligand 1	NAMPT
LINC00998	long intergenic non-protein coding RNA 998	OSM
SPZ1	spermatogenic leucine zipper 1	PF4
CX3CR1	chemokine (C-X3-C motif) receptor 1	SPP1
TMEM106B	transmembrane protein 106B	TNF
RFPL1	ret finger protein-like 1	TNFRSF11B
INSM1	insulinoma-associated 1	TNFSF10
PHYHIPL	phytanoyl-CoA 2-hydroxylase interacting protein-like	TNFSF11
PCK1	phosphoenolpyruvate carboxykinase 1 (soluble)	TNFSF13B
SLC43A3	solute carrier family 43, member 3	TNFSF14
LYRM5	LYR motif containing 5	TNFSF4
TEX12	testis expressed 12	VEGFA
FKBP14	FK506 binding protein 14, 22 kDa	XCL1
TRMT11	tRNA methyltransferase 11 homolog (S. cerevisiae)	NFKBIA
ATOH7	atonal homolog 7 (Drosophila)	CD36
OTUD4	OTU domain containing 4	STAT1
LMAN2	lectin, mannose-binding 2	MAFB
SFXN1	sideroflexin 1
QPCT	glutaminyl-peptide cyclotransferase
HOXA10	homeobox A10
EIF5AL1	eukaryotic translation initiation factor 5A-like 1
PTGES3L	prostaglandin E synthase 3 (cytosolic)-like
FEZ2	fasciculation and elongation protein zeta 2 (zygin II)
ELOVL7	ELOVL fatty acid elongase 7
SGPP1	sphingosine-1-phosphate phosphatase 1
IL4	interleukin 4
PIGF	phosphatidylinositol glycan anchor biosynthesis, class F
RBM46	RNA binding motif protein 46
OR8D1	olfactory receptor, family 8, subfamily D, member 1
RANBP3L	RAN binding protein 3-like
HMGN4	high mobility group nucleosomal binding domain 4
CBLN4	cerebellin 4 precursor
WDR16	WD repeat domain 16
TATDN3	TatD DNase domain containing 3
SKP2	S-phase kinase-associated protein 2, E3 ubiquitin protein ligase
MROH9	maestro heat-like repeat family member 9
CETN1	centrin, EF-hand protein, 1
AKAP5	A kinase (PRKA) anchor protein 5
SERP1	stress-associated endoplasmic reticulum protein 1
ZNF662	zinc finger protein 662
YIPF5	Yip1 domain family, member 5
SERPINB2	serpin peptidase inhibitor, clade B (ovalbumin), member 2
MIPOL1	mirror-image polydactyly 1
ACTN1	actinin, alpha 1
CHRM2	cholinergic receptor, muscarinic 2
MBNL1	muscleblind-like splicing regulator 1
NR4A3	nuclear receptor subfamily 4, group A, member 3
ZFAND1	zinc finger, AN1-type domain 1
SCP2	sterol carrier protein 2
FUT9	fucosyltransferase 9 (alpha (1,3) fucosyltransferase)
SEPT10	septin 10
ZNF577	zinc finger protein 577
TMEM56	transmembrane protein 56
STOX1	storkhead box 1
BMI1	BMI1 polycomb ring finger oncogene
TNFRSF11B	tumor necrosis factor receptor superfamily, member 11b
RSPO3	R-spondin 3
ZFP14	ZFP14 zinc finger protein
TFEC	transcription factor EC
IFIT5	interferon-induced protein with tetratricopeptide repeats 5
SCPEP1	serine carboxypeptidase 1
POU5F1B	POU class 5 homeobox 1B
GALNT18	UDP-N-acetyl-alpha-D-galactosamine:polypeptide N-acetylgalactosaminyltransferase 18
SCGB3A2	secretoglobin, family 3A, member 2
LIN28B	lin-28 homolog B (C. elegans)
ZNF330	zinc finger protein 330
SNX7	sorting nexin 7
CNPY1	canopy FGF signaling regulator 1
MRPS28	mitochondrial ribosomal protein S28
RSL24D1	ribosomal L24 domain containing 1
CWF19L2	CWF19-like 2, cell cycle control (S. pombe)
IRAK4	interleukin-1 receptor-associated kinase 4
ZBBX	zinc finger, B-box domain containing
FAM199X	family with sequence similarity 199, X-linked
NECAB1	N-terminal EF-hand calcium binding protein 1
PNRC2	proline-rich nuclear receptor coactivator 2
ZNF791	zinc finger protein 791
C8orf48	chromosome 8 open reading frame 48
ZNF420	zinc finger protein 420
NFXL1	nuclear transcription factor, X-box binding-like 1
TMF1	TATA element modulatory factor 1
ACTL6A	actin-like 6A
ZNF503	zinc finger protein 503
TBCCD1	TBCC domain containing 1
MCCD1	mitochondrial coiled-coil domain 1
TMEM5	transmembrane protein 5
TMEM206	transmembrane protein 206
RP11-664D7.4	HCG1787533; Uncharacterized protein
TSNAX	translin-associated factor X
DKFZP434E1119
ST6GALNAC5	ST6 (alpha-N-acetyl-neuraminyl-2,3-beta-galactosyl-1,3)-N-acetylgalactosaminide alpha-2,6-sialyltransferase 5
SIRT7	sirtuin 7
HOXB4	homeobox B4
NGLY1	N-glycanase 1
ASB9	ankyrin repeat and SOCS box containing 9
LDHAL6A	lactate dehydrogenase A-like 6A
NIPSNAP3B	nipsnap homolog 3B (C. elegans)
COMMD3-BMI1	COMMD3-BMI1 readthrough
LRRC18	leucine rich repeat containing 18
WNT5A	wingless-type MMTV integration site family, member 5A
DCDC2	doublecortin domain containing 2
UVRAG	UV radiation resistance associated
SNX16	sorting nexin 16
C16orf72	chromosome 16 open reading frame 72
ALDH1A1	aldehyde dehydrogenase 1 family, member A1
PIK3CA	phosphatidylinositol-4,5-bisphosphate 3-kinase, catalytic subunit alpha
CTD-2054N24.2	Uncharacterized protein
FBXO45	F-box protein 45
C8orf12	chromosome 8 open reading frame 12
GCSAML	germinal center-associated, signaling and motility-like
NME1-NME2	NME1-NME2 readthrough
PLEKHA3	pleckstrin homology domain containing, family A (phosphoinositide binding specific) member 3
UBE2N	ubiquitin-conjugating enzyme E2N
SDC4	syndecan 4
CDC42SE2	CDC42 small effector 2
SRGN	serglycin
PRKAR1A	protein kinase, cAMP-dependent, regulatory, type I, alpha
CISD2	CDGSH iron sulfur domain 2
LUC7L3	LUC7-like 3 (S. cerevisiae)
SCUBE2	signal peptide, CUB domain, EGF-like 2
ZNF140	zinc finger protein 140
TM4SF20	transmembrane 4 L six family member 20
TRAT1	T cell receptor associated transmembrane adaptor 1
IKZF5	IKAROS family zinc finger 5 (Pegasus)
LUZP2	leucine zipper protein 2
RTN4	reticulon 4
NDUFA5	NADH dehydrogenase (ubiquinone) 1 alpha subcomplex, 5
ZNF658	zinc finger protein 658
BCL10	B-cell CLL/lymphoma 10
RP11-366L20.2	Uncharacterized protein
CCDC148	coiled-coil domain containing 148
MIOS	missing oocyte, meiosis regulator, homolog (Drosophila)
ANKS1B	ankyrin repeat and sterile alpha motif domain containing 1B
TULP3	tubby like protein 3
PWP1	PWP1 homolog (S. cerevisiae)
ARID4A	AT rich interactive domain 4A (RBP1-like)
SF3A3	splicing factor 3a, subunit 3, 60kDa
CDRT4	CMT1A duplicated region transcript 4
SNX31	sorting nexin 31
LPXN	leupaxin
AMIGO2	adhesion molecule with Ig-like domain 2
REEP3	receptor accessory protein 3
HTR5A-AS1	HTR5A antisense RNA 1
LAMTOR5	late endosomal/lysosomal adaptor, MAPK and MTOR activator 5
PAX9	paired box 9
SEC62	SEC62 homolog (S. cerevisiae)
SLCO4A1	solute carrier organic anion transporter family, member 4A1
CASC5	cancer susceptibility candidate 5
MFSD11	major facilitator superfamily domain containing 11
MCEE	methylmalonyl CoA epimerase
ASB5	ankyrin repeat and SOCS box containing 5
MRAS	muscle RAS oncogene homolog
RP11-386G21.1	Uncharacterized protein
RAPGEF6	Rap guanine nucleotide exchange factor (GEF) 6
SCIMP	SLP adaptor and CSK interacting membrane protein
RP11-758M4.1	Uncharacterized protein
JRKL	jerky homolog-like (mouse)
HIATL2	hippocampus abundant transcript-like 2
TEFM	transcription elongation factor, mitochondrial
PCDHB11	protocadherin beta 11
IL7	interleukin 7
LHCGR	luteinizing hormone/choriogonadotropin receptor
LRAT	lecithin retinol acyltransferase (phosphatidylcholine--retinol O-acyltransferase)
FAM83F	family with sequence similarity 83, member F
B3GNT2	UDP-GlcNAc:betaGal beta-1,3-N-acetylglucosaminyltransferase 2
ZNF404	zinc finger protein 404
ACTR3B	ARP3 actin-related protein 3 homolog B (yeast)
CSGALNACT2	chondroitin sulfate N-acetylgalactosaminyltransferase 2
DNAJC24	DnaJ (Hsp40) homolog, subfamily C, member 24
SNRPG	small nuclear ribonucleoprotein polypeptide G
C10orf68	chromosome 10 open reading frame 68
UTP18	UTP18 small subunit (SSU) processome component homolog (yeast)
PAH	phenylalanine hydroxylase
PDIA4	protein disulfide isomerase family A, member 4
C11orf73	chromosome 11 open reading frame 73
FAM133A	family with sequence similarity 133, member A
NDUFAF7	NADH dehydrogenase (ubiquinone) complex I, assembly factor 7
ZNF24	zinc finger protein 24
DACH1	dachshund homolog 1 (Drosophila)
SOCS5	suppressor of cytokine signaling 5
EDN1	endothelin 1
CDIP1	cell death-inducing p53 target 1
STX18	syntaxin 18
GTF2F2	general transcription factor IIF, polypeptide 2, 30kDa
HINT3	histidine triad nucleotide binding protein 3
RAPGEF4	Rap guanine nucleotide exchange factor (GEF) 4
NME2	NME/NM23 nucleoside diphosphate kinase 2
LIN7C	lin-7 homolog C (C. elegans)
FCF1	FCF1 rRNA-processing protein
VAMP3	vesicle-associated membrane protein 3
ITGAV	integrin, alpha V
DCUN1D2	DCN1, defective in cullin neddylation 1, domain containing 2
RASSF3	Ras association (RalGDS/AF-6) domain family member 3
ZNF141	zinc finger protein 141
WSB1	WD repeat and SOCS box containing 1
DEDD	death effector domain containing
TSSK6	testis-specific serine kinase 6
TEDDM1	transmembrane epididymal protein 1
ST8SIA1	ST8 alpha-N-acetyl-neuraminide alpha-2,8-sialyltransferase 1
GUCY1B3	guanylate cyclase 1, soluble, beta 3
RQCD1	RCD1 required for cell differentiation1 homolog (S. pombe)
CCDC38	coiled-coil domain containing 38
FCER1A	Fc fragment of IgE, high affinity I, receptor for; alpha polypeptide
SNX14	sorting nexin 14
LPAR4	lysophosphatidic acid receptor 4
TAS2R5	taste receptor, type 2, member 5
COPB1	coatomer protein complex, subunit beta 1
HNRNPA1	heterogeneous nuclear ribonucleoprotein A1
PPP1CC	protein phosphatase 1, catalytic subunit, gamma isozyme
SIAH2	siah E3 ubiquitin protein ligase 2
PDLIM1	PDZ and LIM domain 1
AC090616.2	Uncharacterized protein
MARCH1	membrane-associated ring finger (C3HC4) 1, E3 ubiquitin protein ligase
ACPP	acid phosphatase, prostate
MRS2	MRS2 magnesium transporter
MLF1	myeloid leukemia factor 1
TMEM33	transmembrane protein 33
LIN54	lin-54 homolog (C. elegans)
PITHD1	PITH (C-terminal proteasome-interacting domain of thioredoxin-like) domain containing 1
C9orf135	chromosome 9 open reading frame 135
MNDA	myeloid cell nuclear differentiation antigen
SAMD13	sterile alpha motif domain containing 13
MAF	v-maf avian musculoaponeurotic fibrosarcoma oncogene homolog
ARMC1	armadillo repeat containing 1
SYNE1	spectrin repeat containing, nuclear envelope 1
CXADR	coxsackie virus and adenovirus receptor
TMEM194A	transmembrane protein 194A
LRIG1	leucine-rich repeats and immunoglobulin-like domains 1
MSRA	methionine sulfoxide reductase A
PNPO	pyridoxamine 5'-phosphate oxidase
FAS	Fas cell surface death receptor
ZPBP2	zona pellucida binding protein 2
DUSP19	dual specificity phosphatase 19
HSCB	HscB mitochondrial iron-sulfur cluster co-chaperone
TLX1NB	TLX1 neighbor
CTC-432M15.3	Folliculin-interacting protein 1
RTN1	reticulon 1
PI15	peptidase inhibitor 15
EFEMP1	EGF containing fibulin-like extracellular matrix protein 1
CCDC152	coiled-coil domain containing 152
REEP1	receptor accessory protein 1
SPRY4	sprouty homolog 4 (Drosophila)
SASS6	spindle assembly 6 homolog (C. elegans)
PRAMEF26	PRAME family member 26
C1S	complement component 1, s subcomponent
SPIN4	spindlin family, member 4
CDKN2AIP	CDKN2A interacting protein
RRAGC	Ras-related GTP binding C
BLOC1S6	biogenesis of lysosomal organelles complex-1, subunit 6, pallidin
PIP5K1B	phosphatidylinositol-4-phosphate 5-kinase, type I, beta
RPE	ribulose-5-phosphate-3-epimerase
GK	glycerol kinase
FAM19A2	family with sequence similarity 19 (chemokine (C-C motif)-like), member A2
ZNF597	zinc finger protein 597
ARNT	aryl hydrocarbon receptor nuclear translocator
SLCO1A2	solute carrier organic anion transporter family, member 1A2
ARHGAP24	Rho GTPase activating protein 24
PRAMEF4	PRAME family member 4
FBXL5	F-box and leucine-rich repeat protein 5
DAZL	deleted in azoospermia-like
FOXD4L3	forkhead box D4-like 3
HHAT	hedgehog acyltransferase
FOXD4L6	forkhead box D4-like 6
ADAM17	ADAM metallopeptidase domain 17
POU1F1	POU class 1 homeobox 1
MARK3	MAP/microtubule affinity-regulating kinase 3
TADA1	transcriptional adaptor 1
FAM91A1	family with sequence similarity 91, member A1
TTC14	tetratricopeptide repeat domain 14
MPC1	mitochondrial pyruvate carrier 1
SPRY3	sprouty homolog 3 (Drosophila)
C12orf5	chromosome 12 open reading frame 5
MRPL36	mitochondrial ribosomal protein L36
DDRGK1	DDRGK domain containing 1
FBXO28	F-box protein 28
HSD17B12	hydroxysteroid (17-beta) dehydrogenase 12
PIGK	phosphatidylinositol glycan anchor biosynthesis, class K
FAM98B	family with sequence similarity 98, member B
PPM1D	protein phosphatase, Mg2+/Mn2+ dependent, 1D
NTPCR	nucleoside-triphosphatase, cancer-related
GIN1	gypsy retrotransposon integrase 1
NOTO	notochord homeobox
P2RY12	purinergic receptor P2Y, G-protein coupled, 12
IER5	immediate early response 5
ZC3H12C	zinc finger CCCH-type containing 12C
TMEM245	transmembrane protein 245
C1QL3	complement component 1, q subcomponent-like 3
RP11-47I22.4
C5orf49	chromosome 5 open reading frame 49
PRPS2	phosphoribosyl pyrophosphate synthetase 2
PMP2	peripheral myelin protein 2
PRAMEF6	PRAME family member 6
RHOU	ras homolog family member U
CAPN2	calpain 2, (m/II) large subunit
RAB22A	RAB22A, member RAS oncogene family
SIRT1	sirtuin 1
LEPR	leptin receptor
PRAMEF9	PRAME family member 9
PRAMEF15	PRAME family member 15
WDR48	WD repeat domain 48
PDHX	pyruvate dehydrogenase complex, component X
RAB2A	RAB2A, member RAS oncogene family
CAMK2N1	calcium/calmodulin-dependent protein kinase II inhibitor 1
SLC19A2	solute carrier family 19 (thiamine transporter), member 2
EIF4G3	eukaryotic translation initiation factor 4 gamma, 3
TMEFF2	transmembrane protein with EGF-like and two follistatin-like domains 2
POU4F1	POU class 4 homeobox 1
ACADSB	acyl-CoA dehydrogenase, short/branched chain
WDR77	WD repeat domain 77
TVP23C-CDRT4	TVP23C-CDRT4 readthrough
GLS	glutaminase
IGF1	insulin-like growth factor 1 (somatomedin C)
DEFB132	defensin, beta 132
LDHB	lactate dehydrogenase B
SLC24A2	solute carrier family 24 (sodium/potassium/calcium exchanger), member 2
ASAH2B	N-acylsphingosine amidohydrolase (non-lysosomal ceramidase) 2B
KPNA4	karyopherin alpha 4 (importin alpha 3)
SMN1	survival of motor neuron 1, telomeric
SCOC	short coiled-coil protein
NOL7	nucleolar protein 7, 27kDa
NSUN2	NOP2/Sun RNA methyltransferase family, member 2
ELF2	E74-like factor 2 (ets domain transcription factor)
FBXO33	F-box protein 33
SMN2	survival of motor neuron 2, centromeric
SERPINB7	serpin peptidase inhibitor, clade B (ovalbumin), member 7
ID4	inhibitor of DNA binding 4, dominant negative helix-loop-helix protein
JAK2	Janus kinase 2
MYOZ2	myozenin 2
C9orf85	chromosome 9 open reading frame 85
ZSCAN5B	zinc finger and SCAN domain containing 5B
ABHD10	abhydrolase domain containing 10
STRADB	STE20-related kinase adaptor beta
ARL2BP	ADP-ribosylation factor-like 2 binding protein
WDR70	WD repeat domain 70
AL163636.6	Homo sapiens ribonuclease, RNase A family, 4 (RNASE4), transcript variant 4, mRNA.
GFOD1	glucose-fructose oxidoreductase domain containing 1
NBN	nibrin
P2RY1	purinergic receptor P2Y, G-protein coupled, 1
SPACA1	sperm acrosome associated 1
BHLHE22	basic helix-loop-helix family, member e22
SSH2	slingshot protein phosphatase 2
PODN	podocan
FAM72A	family with sequence similarity 72, member A
MANEA	mannosidase, endo-alpha
MYCBP	MYC binding protein
MRP63	mitochondrial ribosomal protein 63
SEPT14	septin 14
ZSWIM2	zinc finger, SWIM-type containing 2
TSFM	Ts translation elongation factor, mitochondrial
MOB1A	MOB kinase activator 1A
GK5	glycerol kinase 5 (putative)
ARID2	AT rich interactive domain 2 (ARID, RFX-like)
TMEM133	transmembrane protein 133
DAZ3	deleted in azoospermia 3
ZNF98	zinc finger protein 98
APP	amyloid beta (A4) precursor protein
HHEX	hematopoietically expressed homeobox
ARL8B	ADP-ribosylation factor-like 8B
ZNF534	zinc finger protein 534
PLEK	pleckstrin
MADD	MAP-kinase activating death domain
TMX3	thioredoxin-related transmembrane protein 3
C10orf11	chromosome 10 open reading frame 11
PRR11	proline rich 11
SRP14	signal recognition particle 14kDa (homologous Alu RNA binding protein)
MCTP1	multiple C2 domains, transmembrane 1
KCNJ6	potassium inwardly-rectifying channel, subfamily J, member 6
MDH1B	malate dehydrogenase 1B, NAD (soluble)
VIP	vasoactive intestinal peptide
ZFP37	ZFP37 zinc finger protein
BEND4	BEN domain containing 4
COMMD2	COMM domain containing 2
PRKAA1	protein kinase, AMP-activated, alpha 1 catalytic subunit
ZNF776	zinc finger protein 776
AC023632.1	HCG2009141; PRO2397; Uncharacterized protein
AC026202.1	Uncharacterized protein
SLC16A12	solute carrier family 16, member 12
MEF2C	myocyte enhancer factor 2C
ELK3	ELK3, ETS-domain protein (SRF accessory protein 2)
OTOR	otoraplin
C14orf180	chromosome 14 open reading frame 180
RTKN2	rhotekin 2
SNW1	SNW domain containing 1
TRIM44	tripartite motif containing 44
MALT1	mucosa associated lymphoid tissue lymphoma translocation gene 1
ABCA1	ATP-binding cassette, sub-family A (ABC1), member 1
C2orf47	chromosome 2 open reading frame 47
CCDC39	coiled-coil domain containing 39
RGS1	regulator of G-protein signaling 1
TEAD1	TEA domain family member 1 (SV40 transcriptional enhancer factor)
DTNBP1	dystrobrevin binding protein 1
C11orf34	chromosome 11 open reading frame 34
AGTR2	angiotensin II receptor, type 2
MYOM3	myomesin 3
FOXD4L4	forkhead box D4-like 4
PUM2	pumilio RNA-binding family member 2
FANCF	Fanconi anemia, complementation group F
ZNF431	zinc finger protein 431
RD3L	retinal degeneration 3-like
GK2	glycerol kinase 2
SLC25A31	solute carrier family 25 (mitochondrial carrier; adenine nucleotide translocator), member 31
PLA2G4D	phospholipase A2, group IVD (cytosolic)
KLHL9	kelch-like family member 9
CCDC117	coiled-coil domain containing 117
ZNF169	zinc finger protein 169
CYSLTR1	cysteinyl leukotriene receptor 1
PTPN20B	protein tyrosine phosphatase, non-receptor type 20B
RNASE4	ribonuclease, RNase A family, 4
ZNF81	zinc finger protein 81
GABRA1	gamma-aminobutyric acid (GABA) A receptor, alpha 1
EIF2A	eukaryotic translation initiation factor 2A, 65kDa
PTPN20A	protein tyrosine phosphatase, non-receptor type 20A
MIER1	mesoderm induction early response 1, transcriptional regulator
VWA8	von Willebrand factor A domain containing 8
CYP4V2	cytochrome P450, family 4, subfamily V, polypeptide 2
ZKSCAN3	zinc finger with KRAB and SCAN domains 3
SLFN12L	schlafen family member 12-like
ENTPD4	ectonucleoside triphosphate diphosphohydrolase 4
PRDM7	PR domain containing 7
NEK7	NIMA-related kinase 7
FMR1	fragile X mental retardation 1
ZBTB25	zinc finger and BTB domain containing 25
NCAPH	non-SMC condensin I complex, subunit H
ZDHHC6	zinc finger, DHHC-type containing 6
ANKRD29	ankyrin repeat domain 29
PPP1R3C	protein phosphatase 1, regulatory subunit 3C
UTP11L	UTP11-like, U3 small nucleolar ribonucleoprotein, (yeast)
TAF1D	TATA box binding protein (TBP)-associated factor, RNA polymerase I, D, 41kDa
TMEM47	transmembrane protein 47
B4GALT6	UDP-Gal:betaGlcNAc beta 1,4- galactosyltransferase, polypeptide 6
UBXN2A	UBX domain protein 2A
H3F3B	H3 histone, family 3B (H3.3B)
RBM3	RNA binding motif (RNP1, RRM) protein 3
EIF4E	eukaryotic translation initiation factor 4E
TOR1B	torsin family 1, member B (torsin B)
PHRF1	PHD and ring finger domains 1
IL13	interleukin 13
CCR5	chemokine (C-C motif) receptor 5 (gene/pseudogene)
GSX2	GS homeobox 2
CABP5	calcium binding protein 5
C14orf2	chromosome 14 open reading frame 2
NRXN1	neurexin 1
RBM44	RNA binding motif protein 44
CELF2	CUGBP, Elav-like family member 2
C18orf56	chromosome 18 open reading frame 56
SIRT4	sirtuin 4
BTLA	B and T lymphocyte associated
TMEM45A	transmembrane protein 45A
C2orf88	chromosome 2 open reading frame 88
TAS2R30	taste receptor, type 2, member 30
GORAB	golgin, RAB6-interacting
ETV3	ets variant 3
HECA	headcase homolog (Drosophila)
PAXIP1-AS2	PAXIP1 antisense RNA 2
LHFPL3	lipoma HMGIC fusion partner-like 3
COPS8	COP9 signalosome subunit 8
RAB10	RAB10, member RAS oncogene family
SPATA18	spermatogenesis associated 18
ITGB2	integrin, beta 2 (complement component 3 receptor 3 and 4 subunit)
FBXL3	F-box and leucine-rich repeat protein 3
HCFC2	host cell factor C2
EPHA7	EPH receptor A7
SELT	Selenoprotein T
SEC24B	SEC24 family, member B (S. cerevisiae)
SPG20	spastic paraplegia 20 (Troyer syndrome)
RWDD3	RWD domain containing 3
CYSLTR2	cysteinyl leukotriene receptor 2
FAM9C	family with sequence similarity 9, member C
CCNK	cyclin K
GMCL1	germ cell-less, spermatogenesis associated 1
UBL3	ubiquitin-like 3
RP11-1220K2.2	Putative inactive maltase-glucoamylase-like protein LOC93432
TCAIM	T cell activation inhibitor, mitochondrial
ZNF85	zinc finger protein 85
FAM204A	family with sequence similarity 204, member A
DCLK1	doublecortin-like kinase 1
AL590483.1	Uncharacterized protein; cDNA FLJ42623 fis, clone BRACE3015894
C14orf23	chromosome 14 open reading frame 23
ARMC2	armadillo repeat containing 2
FAM177A1	family with sequence similarity 177, member A1
FAM92A1	family with sequence similarity 92, member A1
EFCAB5	EF-hand calcium binding domain 5
CCDC147	coiled-coil domain containing 147
TMX4	thioredoxin-related transmembrane protein 4
SMCHD1	structural maintenance of chromosomes flexible hinge domain containing 1
MTMR8	myotubularin related protein 8
CHST2	carbohydrate (N-acetylglucosamine-6-O) sulfotransferase 2
FAM110D	family with sequence similarity 110, member D
IFNA6	interferon, alpha 6
TAC3	tachykinin 3
PARP15	poly (ADP-ribose) polymerase family, member 15
RGL3	ral guanine nucleotide dissociation stimulator-like 3
TMEM261	transmembrane protein 261
SUMO1	small ubiquitin-like modifier 1
KIAA1143	KIAA1143
CALCOCO2	calcium binding and coiled-coil domain 2
SLC25A25	solute carrier family 25 (mitochondrial carrier; phosphate carrier), member 25
RNF144B	ring finger protein 144B
MAP2K6	mitogen-activated protein kinase kinase 6
ZNF256	zinc finger protein 256
PLN	phospholamban
ARNTL2	aryl hydrocarbon receptor nuclear translocator-like 2
PTPN13	protein tyrosine phosphatase, non-receptor type 13 (APO-1/CD95 (Fas)-associated phosphatase)
DLG3	discs, large homolog 3 (Drosophila)
ZNF585A	zinc finger protein 585A
TMEM200A	transmembrane protein 200A
EMC7	ER membrane protein complex subunit 7
POLR2D	polymerase (RNA) II (DNA directed) polypeptide D
ADAM22	ADAM metallopeptidase domain 22
RHOQ	ras homolog family member Q
BOD1L2	biorientation of chromosomes in cell division 1-like 2
NFE2L2	nuclear factor, erythroid 2-like 2
MAFB	v-maf avian musculoaponeurotic fibrosarcoma oncogene homolog B
ALKBH8	alkB, alkylation repair homolog 8 (E. coli)
PRKAG3	protein kinase, AMP-activated, gamma 3 non-catalytic subunit
HIST1H2BK	histone cluster 1, H2bk
NRIP3	nuclear receptor interacting protein 3
MOAP1	modulator of apoptosis 1
MS4A6A	membrane-spanning 4-domains, subfamily A, member 6A
NHLRC2	NHL repeat containing 2
NEMF	nuclear export mediator factor
HIPK4	homeodomain interacting protein kinase 4
SLC6A8	solute carrier family 6 (neurotransmitter transporter), member 8
LAMA2	laminin, alpha 2
C15orf41	chromosome 15 open reading frame 41
SGK223	Tyrosine-protein kinase SgK223
CCR9	chemokine (C-C motif) receptor 9
RFESD	Rieske (Fe-S) domain containing
ATP7B	ATPase, Cu++ transporting, beta polypeptide
STT3B	STT3B, subunit of the oligosaccharyltransferase complex (catalytic)
AGPAT5	1-acylglycerol-3-phosphate O-acyltransferase 5
LGR5	leucine-rich repeat containing G protein-coupled receptor 5
TNFRSF19	tumor necrosis factor receptor superfamily, member 19
CFHR4	complement factor H-related 4
AP3S1	adaptor-related protein complex 3, sigma 1 subunit
DLG2	discs, large homolog 2 (Drosophila)
FAM8A1	family with sequence similarity 8, member A1
HIST1H2BH	histone cluster 1, H2bh
CWC22	CWC22 spliceosome-associated protein homolog (S. cerevisiae)
BMP2	bone morphogenetic protein 2
FNIP1	folliculin interacting protein 1
PRKAR2B	protein kinase, cAMP-dependent, regulatory, type II, beta
KIAA0355	KIAA0355
CPEB2	cytoplasmic polyadenylation element binding protein 2
LAMP2	lysosomal-associated membrane protein 2
CPE	carboxypeptidase E
C3orf30	chromosome 3 open reading frame 30
PRDX3	peroxiredoxin 3
IGSF11	immunoglobulin superfamily, member 11
VIT	vitrin
CCNE1	cyclin E1
SEP15	Homo sapiens 15 kDa selenoprotein (SEP15), transcript variant 2, mRNA.
FCRL4	Fc receptor-like 4
EPYC	epiphycan
COL11A1	collagen, type XI, alpha 1
OR11H6	olfactory receptor, family 11, subfamily H, member 6
LPGAT1	lysophosphatidylglycerol acyltransferase 1
BRD1	bromodomain containing 1
RTF1	Rtf1, Paf1/RNA polymerase II complex component, homolog (S. cerevisiae)
KLHDC1	kelch domain containing 1
CXorf56	chromosome X open reading frame 56
FDXACB1	ferredoxin-fold anticodon binding domain containing 1
RP2	retinitis pigmentosa 2 (X-linked recessive)
AEBP2	AE binding protein 2
ANKRD22	ankyrin repeat domain 22
ZNF724P	zinc finger protein 724, pseudogene
PDE1C	phosphodiesterase 1C, calmodulin-dependent 70kDa
ARL13B	ADP-ribosylation factor-like 13B
HOMER1	homer homolog 1 (Drosophila)
C9orf78	chromosome 9 open reading frame 78
SLCO1C1	solute carrier organic anion transporter family, member 1C1
RORB	RAR-related orphan receptor B
DMTF1	cyclin D binding myb-like transcription factor 1
PARP11	poly (ADP-ribose) polymerase family, member 11
TRMT10A	tRNA methyltransferase 10 homolog A (S. cerevisiae)
METTL4	methyltransferase like 4
TRMT12	tRNA methyltransferase 12 homolog (S. cerevisiae)
HSPA4L	heat shock 70kDa protein 4-like
FAM126B	family with sequence similarity 126, member B
TRMT1L	tRNA methyltransferase 1 homolog (S. cerevisiae)-like
BCKDHB	branched chain keto acid dehydrogenase E1, beta polypeptide
CCNH	cyclin H
CACYBP	calcyclin binding protein
HKDC1	hexokinase domain containing 1
CHRM3	cholinergic receptor, muscarinic 3
SPRED1	sprouty-related, EVH1 domain containing 1
SUCNR1	succinate receptor 1
CFHR3	complement factor H-related 3
ZNF180	zinc finger protein 180
NUBPL	nucleotide binding protein-like
FGF7	fibroblast growth factor 7
RBMXL1	RNA binding motif protein, X-linked-like 1
YWHAB	tyrosine 3-monooxygenase/tryptophan 5-monooxygenase activation protein, beta polypeptide
HIPK2	homeodomain interacting protein kinase 2
MAN1A2	mannosidase, alpha, class 1A, member 2
MPV17L	MPV17 mitochondrial membrane protein-like
MFSD6	major facilitator superfamily domain containing 6
CHM	choroideremia (Rab escort protein 1)
KLF3	Kruppel-like factor 3 (basic)
ARV1	ARV1 homolog (S. cerevisiae)
XK	X-linked Kx blood group (McLeod syndrome)
MYCT1	myc target 1
SULT4A1	sulfotransferase family 4A, member 1
PRR18	proline rich 18
AKAP2	A kinase (PRKA) anchor protein 2
TRIP13	thyroid hormone receptor interactor 13
PLA2G2C	phospholipase A2, group IIC
NCOA7	nuclear receptor coactivator 7
NIPAL2	NIPA-like domain containing 2
AKIRIN1	akirin 1
KCNMB3	potassium large conductance calcium-activated channel, subfamily M beta member 3
ATP6AP2	ATPase, H+ transporting, lysosomal accessory protein 2
HIST1H3G	histone cluster 1, H3g
DSC2	desmocollin 2
ZNF124	zinc finger protein 124
ETNPPL	ethanolamine-phosphate phospho-lyase
TMEM41B	transmembrane protein 41B
IQCK	IQ motif containing K
RANBP17	RAN binding protein 17
AP4E1	adaptor-related protein complex 4, epsilon 1 subunit
MARCH7	membrane-associated ring finger (C3HC4) 7, E3 ubiquitin protein ligase
IL6ST	interleukin 6 signal transducer (gp130, oncostatin M receptor)
CNEP1R1	CTD nuclear envelope phosphatase 1 regulatory subunit 1
FAM3C	family with sequence similarity 3, member C
CHIC1	cysteine-rich hydrophobic domain 1
DDIT4L	DNA-damage-inducible transcript 4-like
SLC25A46	solute carrier family 25, member 46
NAB1	NGFI-A binding protein 1 (EGR1 binding protein 1)
SET	SET nuclear oncogene
CCDC176	coiled-coil domain containing 176
AMBN	ameloblastin (enamel matrix protein)
KLHL29	kelch-like family member 29
CYP51A1	cytochrome P450, family 51, subfamily A, polypeptide 1
SPP1	secreted phosphoprotein 1
LDLRAD3	low density lipoprotein receptor class A domain containing 3
PIGC	phosphatidylinositol glycan anchor biosynthesis, class C
SRBD1	S1 RNA binding domain 1
MKRN2	makorin ring finger protein 2
EPB41L1	erythrocyte membrane protein band 4.1-like 1
C1GALT1	core 1 synthase, glycoprotein-N-acetylgalactosamine 3-beta-galactosyltransferase, 1
OLA1	Obg-like ATPase 1
DCBLD2	discoidin, CUB and LCCL domain containing 2
RFC3	replication factor C (activator 1) 3, 38kDa
IMPG2	interphotoreceptor matrix proteoglycan 2
BEGAIN	brain-enriched guanylate kinase-associated
ZNF782	zinc finger protein 782
ZNF302	zinc finger protein 302
PIK3R4	phosphoinositide-3-kinase, regulatory subunit 4
USP42	ubiquitin specific peptidase 42
HIF1A	hypoxia inducible factor 1, alpha subunit (basic helix-loop-helix transcription factor)
CBR4	carbonyl reductase 4
ZDHHC2	zinc finger, DHHC-type containing 2
PTPLB	protein tyrosine phosphatase-like (proline instead of catalytic arginine), member b
CREG2	cellular repressor of E1A-stimulated genes 2
PLP1	proteolipid protein 1
PITX1	paired-like homeodomain 1
C2CD3	C2 calcium-dependent domain containing 3
SPAG11A	sperm associated antigen 11A
SPAG11B	sperm associated antigen 11B
LRRC59	leucine rich repeat containing 59
BMP2K	BMP2 inducible kinase
BTF3	basic transcription factor 3
TVP23B	trans-golgi network vesicle protein 23 homolog B (S. cerevisiae)
PHTF1	putative homeodomain transcription factor 1
GPR15	G protein-coupled receptor 15
MMP1	matrix metallopeptidase 1 (interstitial collagenase)
DAZ2	deleted in azoospermia 2
DOCK7	dedicator of cytokinesis 7
F8	coagulation factor VIII, procoagulant component
TAP2	transporter 2, ATP-binding cassette, sub-family B (MDR/TAP)
C8orf46	chromosome 8 open reading frame 46
POLR2M	polymerase (RNA) II (DNA directed) polypeptide M
TEK	TEK tyrosine kinase, endothelial
FGF23	fibroblast growth factor 23
SLC30A5	solute carrier family 30 (zinc transporter), member 5
CD46	CD46 molecule, complement regulatory protein
C6orf106	chromosome 6 open reading frame 106
CPSF7	cleavage and polyadenylation specific factor 7, 59kDa
RGN	regucalcin
HOOK1	hook microtubule-tethering protein 1
METTL5	methyltransferase like 5
RBFOX1	RNA binding protein, fox-1 homolog (C. elegans) 1
KAT2B	K(lysine) acetyltransferase 2B
CST3	cystatin C
UBE2W	ubiquitin-conjugating enzyme E2W (putative)
ALCAM	activated leukocyte cell adhesion molecule
DTWD2	DTW domain containing 2
ORMDL1	ORM1-like 1 (S. cerevisiae)
GOLGA6L10	Putative golgin subfamily A member 6-like protein 10
FAM131B	family with sequence similarity 131, member B
DPPA4	developmental pluripotency associated 4
RNF19A	ring finger protein 19A, RBR E3 ubiquitin protein ligase
GINS3	GINS complex subunit 3 (Psf3 homolog)
CASD1	CAS1 domain containing 1
ZNF415	zinc finger protein 415
KIAA1324	KIAA1324
MSI2	musashi RNA-binding protein 2
MRPL44	mitochondrial ribosomal protein L44
TRABD2A	TraB domain containing 2A
TMEM126B	transmembrane protein 126B
AL162407.1	CDNA FLJ20147 fis, clone COL07954; HCG1781466; Uncharacterized protein
ARRDC3	arrestin domain containing 3
CDC23	cell division cycle 23
OR9Q1	olfactory receptor, family 9, subfamily Q, member 1
PCDHB17	Protocadherin-psi1; Uncharacterized protein
SIGLECL1	SIGLEC family like 1
ACBD7	acyl-CoA binding domain containing 7
STON1	stonin 1
MAST1	microtubule associated serine/threonine kinase 1
RNF214	ring finger protein 214
RBM4B	RNA binding motif protein 4B
MOSPD2	motile sperm domain containing 2
TBK1	TANK-binding kinase 1
TDG	thymine-DNA glycosylase
GSTCD	glutathione S-transferase, C-terminal domain containing
FGF10	fibroblast growth factor 10
NFIB	nuclear factor I/B
NKRF	NFKB repressing factor
CDH13	cadherin 13
TMOD3	tropomodulin 3 (ubiquitous)
EFR3A	EFR3 homolog A (S. cerevisiae)
ZNF277	zinc finger protein 277
THEMIS2	thymocyte selection associated family member 2
RAP2A	RAP2A, member of RAS oncogene family
KBTBD11	kelch repeat and BTB (POZ) domain containing 11
DKC1	dyskeratosis congenita 1, dyskerin
FBXW11	F-box and WD repeat domain containing 11
PALM2-AKAP2	PALM2-AKAP2 readthrough
CRYZ	crystallin, zeta (quinone reductase)
COX5A	cytochrome c oxidase subunit Va
CSTF1	cleavage stimulation factor, 3' pre-RNA, subunit 1, 50kDa
MYO5A	myosin VA (heavy chain 12, myoxin)
CYCS	cytochrome c, somatic
CREBRF	CREB3 regulatory factor
PTPN11	protein tyrosine phosphatase, non-receptor type 11
ST8SIA4	ST8 alpha-N-acetyl-neuraminide alpha-2,8-sialyltransferase 4
RPUSD4	RNA pseudouridylate synthase domain containing 4
PDZD3	PDZ domain containing 3
PRRG4	proline rich Gla (G-carboxyglutamic acid) 4 (transmembrane)
LAMTOR3	late endosomal/lysosomal adaptor, MAPK and MTOR activator 3
LIG4	ligase IV, DNA, ATP-dependent
RND1	Rho family GTPase 1
CRLF3	cytokine receptor-like factor 3
TMPRSS11A	transmembrane protease, serine 11A
ACVR1C	activin A receptor, type IC
KIAA1430	KIAA1430
LRP11	low density lipoprotein receptor-related protein 11
KLHL14	kelch-like family member 14
GCSAM	germinal center-associated, signaling and motility
ZNF572	zinc finger protein 572
DCLK2	doublecortin-like kinase 2
STOM	stomatin
STYX	serine/threonine/tyrosine interacting protein
COG6	component of oligomeric golgi complex 6
BCL2L13	BCL2-like 13 (apoptosis facilitator)
COG2	component of oligomeric golgi complex 2
TBPL1	TBP-like 1
SIAE	sialic acid acetylesterase
CC2D2B	coiled-coil and C2 domain containing 2B
LUZP6	leucine zipper protein 6
TSPAN7	tetraspanin 7
ARHGAP6	Rho GTPase activating protein 6
SETD8	SET domain containing (lysine methyltransferase) 8
ZFP30	ZFP30 zinc finger protein
MTTP	microsomal triglyceride transfer protein
DDX21	DEAD (Asp-Glu-Ala-Asp) box helicase 21
LIN9	lin-9 homolog (C. elegans)
PAX4	paired box 4
RGS13	regulator of G-protein signaling 13
AC022532.1	Uncharacterized protein
RAB11FIP3	RAB11 family interacting protein 3 (class II)
SNX13	sorting nexin 13
SMIM8	small integral membrane protein 8
POU3F3	POU class 3 homeobox 3
APPBP2	amyloid beta precursor protein (cytoplasmic tail) binding protein 2
ARPP21	cAMP-regulated phosphoprotein, 21kDa
ANLN	anillin, actin binding protein
MAEL	maelstrom spermatogenic transposon silencer
SERPINA5	serpin peptidase inhibitor, clade A (alpha-1 antiproteinase, antitrypsin), member 5
RWDD2A	RWD domain containing 2A
ZNF568	zinc finger protein 568
CXorf57	chromosome X open reading frame 57
MARCH8	membrane-associated ring finger (C3HC4) 8, E3 ubiquitin protein ligase
TUBGCP3	tubulin, gamma complex associated protein 3
PAG1	phosphoprotein associated with glycosphingolipid microdomains 1
TMEM170B	transmembrane protein 170B
ONECUT1	one cut homeobox 1
NAA15	N(alpha)-acetyltransferase 15, NatA auxiliary subunit
UBE2D1	ubiquitin-conjugating enzyme E2D 1
SNURF	SNRPN upstream reading frame protein
ZIC2	Zic family member 2
RP11-169F17.1	Protein LOC400655
TMX2	thioredoxin-related transmembrane protein 2
KDSR	3-ketodihydrosphingosine reductase
CDK20	cyclin-dependent kinase 20
VPS45	vacuolar protein sorting 45 homolog (S. cerevisiae)
DENND1B	DENN/MADD domain containing 1B
C1orf101	chromosome 1 open reading frame 101
AC027763.2	Uncharacterized protein
LONRF1	LON peptidase N-terminal domain and ring finger 1
LRRC16B	leucine rich repeat containing 16B
PCGF5	polycomb group ring finger 5
CNR1	cannabinoid receptor 1 (brain)
CUL5	cullin 5
PIWIL2	piwi-like RNA-mediated gene silencing 2
AK9	adenylate kinase 9
CA1	carbonic anhydrase I
RCHY1	ring finger and CHY zinc finger domain containing 1, E3 ubiquitin protein ligase
HAP1	huntingtin-associated protein 1
MBOAT2	membrane bound O-acyltransferase domain containing 2
GOLPH3L	golgi phosphoprotein 3-like
CTTNBP2NL	CTTNBP2 N-terminal like
PRPSAP1	phosphoribosyl pyrophosphate synthetase-associated protein 1
ADAMTS3	ADAM metallopeptidase with thrombospondin type 1 motif, 3
EMP1	epithelial membrane protein 1
ZBTB8A	zinc finger and BTB domain containing 8A
GABRA2	gamma-aminobutyric acid (GABA) A receptor, alpha 2
ZBTB8OS	zinc finger and BTB domain containing 8 opposite strand
SPINK5	serine peptidase inhibitor, Kazal type 5
PRDM14	PR domain containing 14
ALOX15	arachidonate 15-lipoxygenase
SLC16A6	solute carrier family 16, member 6
TMEM150C	transmembrane protein 150C
DDAH1	dimethylarginine dimethylaminohydrolase 1
IARS2	isoleucyl-tRNA synthetase 2, mitochondrial
FAM169A	family with sequence similarity 169, member A
TMTC3	transmembrane and tetratricopeptide repeat containing 3
AL139099.1	Full-length cDNA clone CS0DK012YO09 of HeLa cells of Homo sapiens (human); Uncharacterized protein
ZNF333	zinc finger protein 333
CD58	CD58 molecule
C3orf70	chromosome 3 open reading frame 70
KCTD9	potassium channel tetramerization domain containing 9
CDH20	cadherin 20, type 2
TMEM55A	transmembrane protein 55A
NCF1	neutrophil cytosolic factor 1
ZNF382	zinc finger protein 382
CDYL	chromodomain protein, Y-like
UBE3D	ubiquitin protein ligase E3D
SLC18B1	solute carrier family 18, subfamily B, member 1
GLS2	glutaminase 2 (liver, mitochondrial)
ZPLD1	zona pellucida-like domain containing 1
SMTNL2	smoothelin-like 2
RBM7	RNA binding motif protein 7
ZNF805	zinc finger protein 805
ALG13	ALG13, UDP-N-acetylglucosaminyltransferase subunit
EPT1	ethanolaminephosphotransferase 1 (CDP-ethanolamine-specific)
BROX	BRO1 domain and CAAX motif containing
ELAVL4	ELAV like neuron-specific RNA binding protein 4
MTMR1	myotubularin related protein 1
MIER3	mesoderm induction early response 1, family member 3
CMPK1	cytidine monophosphate (UMP-CMP) kinase 1, cytosolic
ST6GAL2	ST6 beta-galactosamide alpha-2,6-sialyltranferase 2
LRRC19	leucine rich repeat containing 19
COL17A1	collagen, type XVII, alpha 1
RP11-1102P16.1	Uncharacterized protein
ZNF793	zinc finger protein 793
FGFBP3	fibroblast growth factor binding protein 3
FUNDC2	FUN14 domain containing 2
TAOK1	TAO kinase 1
MFSD8	major facilitator superfamily domain containing 8
ESCO1	establishment of sister chromatid cohesion N-acetyltransferase 1
IDE	insulin-degrading enzyme
SLC26A2	solute carrier family 26 (anion exchanger), member 2
CACNB4	calcium channel, voltage-dependent, beta 4 subunit
RBM8A	RNA binding motif protein 8A
C2orf83	chromosome 2 open reading frame 83
SPOCK3	sparc/osteonectin, cwcv and kazal-like domains proteoglycan (testican) 3
PPP2R2D	protein phosphatase 2, regulatory subunit B, delta
HLF	hepatic leukemia factor
PANX1	pannexin 1
PCMTD2	protein-L-isoaspartate (D-aspartate) O-methyltransferase domain containing 2
GPR137B	G protein-coupled receptor 137B
HSF2	heat shock transcription factor 2
MYO5B	myosin VB
SMUG1	single-strand-selective monofunctional uracil-DNA glycosylase 1
SLC1A2	solute carrier family 1 (glial high affinity glutamate transporter), member 2
RAB12	RAB12, member RAS oncogene family
MRPL45	mitochondrial ribosomal protein L45
GNA14	guanine nucleotide binding protein (G protein), alpha 14
CCR4	chemokine (C-C motif) receptor 4
BAAT	bile acid CoA: amino acid N-acyltransferase (glycine N-choloyltransferase)
LGSN	lengsin, lens protein with glutamine synthetase domain
ZNF493	zinc finger protein 493
ENPP4	ectonucleotide pyrophosphatase/phosphodiesterase 4 (putative)
ZDHHC21	zinc finger, DHHC-type containing 21
KRIT1	KRIT1, ankyrin repeat containing
MTFR1L	mitochondrial fission regulator 1-like
KIAA1024L	KIAA1024-like
ZKSCAN8	zinc finger with KRAB and SCAN domains 8
PRRC2A	proline-rich coiled-coil 2A
PLEKHA8	pleckstrin homology domain containing, family A (phosphoinositide binding specific) member 8
STAT1	signal transducer and activator of transcription 1, 91kDa
ARID4B	AT rich interactive domain 4B (RBP1-like)
GMFB	glia maturation factor, beta
ZIC5	Zic family member 5
UBQLN1	ubiquilin 1
TMEM65	transmembrane protein 65
VSIG1	V-set and immunoglobulin domain containing 1
DAZ1	deleted in azoospermia 1
RBPMS	RNA binding protein with multiple splicing
LPCAT1	lysophosphatidylcholine acyltransferase 1
RASA1	RAS p21 protein activator (GTPase activating protein) 1
ABCD3	ATP-binding cassette, sub-family D (ALD), member 3
SLC9A2	solute carrier family 9, subfamily A (NHE2, cation proton antiporter 2), member 2
DCUN1D1	DCN1, defective in cullin neddylation 1, domain containing 1
MTMR6	myotubularin related protein 6
CHAMP1	chromosome alignment maintaining phosphoprotein 1
STEAP2	STEAP family member 2, metalloreductase
RBM18	RNA binding motif protein 18
C11orf88	chromosome 11 open reading frame 88
CYLC2	cylicin, basic protein of sperm head cytoskeleton 2
IRF8	interferon regulatory factor 8
CRYBG3	beta-gamma crystallin domain containing 3
SULF1	sulfatase 1
BLOC1S5	biogenesis of lysosomal organelles complex-1, subunit 5, muted
NEDD4	neural precursor cell expressed, developmentally down-regulated 4, E3 ubiquitin protein ligase
BLOC1S2	biogenesis of lysosomal organelles complex-1, subunit 2
ZNF655	zinc finger protein 655
CCNI2	cyclin I family, member 2
PARD6G	par-6 family cell polarity regulator gamma
RWDD4	RWD domain containing 4
DAZ4	deleted in azoospermia 4
LCN15	lipocalin 15
NBEAL1	neurobeachin-like 1
DMRTA2	DMRT-like family A2
RIF1	RAP1 interacting factor homolog (yeast)
HOXB9	homeobox B9
TMEM183A	transmembrane protein 183A
CNBP	CCHC-type zinc finger, nucleic acid binding protein
PTAR1	protein prenyltransferase alpha subunit repeat containing 1
G2E3	G2/M-phase specific E3 ubiquitin protein ligase
PSG9	pregnancy specific beta-1-glycoprotein 9
SYT16	synaptotagmin XVI
C5orf51	chromosome 5 open reading frame 51
AICDA	activation-induced cytidine deaminase
FAM196A	family with sequence similarity 196, member A
ARHGAP5	Rho GTPase activating protein 5
FRRS1L	ferric-chelate reductase 1-like
OTUD3	OTU domain containing 3
CALCR	calcitonin receptor
NREP	neuronal regeneration related protein
C18orf63	chromosome 18 open reading frame 63
C7orf60	chromosome 7 open reading frame 60
ARHGAP10	Rho GTPase activating protein 10
KIAA0947	KIAA0947
GLCCI1	glucocorticoid induced transcript 1
CISD1	CDGSH iron sulfur domain 1
ERLEC1	endoplasmic reticulum lectin 1
ING5	inhibitor of growth family, member 5
LGR4	leucine-rich repeat containing G protein-coupled receptor 4
VWC2	von Willebrand factor C domain containing 2
POP4	processing of precursor 4, ribonuclease P/MRP subunit (S. cerevisiae)
AGPAT9	1-acylglycerol-3-phosphate O-acyltransferase 9
GPR4	G protein-coupled receptor 4
MLLT4	myeloid/lymphoid or mixed-lineage leukemia (trithorax homolog, Drosophila); translocated to, 4
SYNM	synemin, intermediate filament protein
INSIG1	insulin induced gene 1
MRPS10	mitochondrial ribosomal protein S10
SLC6A15	solute carrier family 6 (neutral amino acid transporter), member 15
ANKRD13A	ankyrin repeat domain 13A
GPR116	G protein-coupled receptor 116
CHIC2	cysteine-rich hydrophobic domain 2
PPM1L	protein phosphatase, Mg2+/Mn2+ dependent, 1L
ARHGEF3	Rho guanine nucleotide exchange factor (GEF) 3
C9orf47	chromosome 9 open reading frame 47
RUFY3	RUN and FYVE domain containing 3
CNTN4	contactin 4
PKIA	protein kinase (cAMP-dependent, catalytic) inhibitor alpha
AARD	alanine and arginine rich domain containing protein
KCNH5	potassium voltage-gated channel, subfamily H (eag-related), member 5
NPY1R	neuropeptide Y receptor Y1
ZNF419	zinc finger protein 419
AKAP7	A kinase (PRKA) anchor protein 7
TMEM259	transmembrane protein 259
ZNF367	zinc finger protein 367
OXR1	oxidation resistance 1
ZSCAN12	zinc finger and SCAN domain containing 12
NUP188	nucleoporin 188kDa
DARS	aspartyl-tRNA synthetase
CMPK2	cytidine monophosphate (UMP-CMP) kinase 2, mitochondrial
AP005482.1	Uncharacterized protein
ARMC10	armadillo repeat containing 10
ZFAND4	zinc finger, AN1-type domain 4
DTNA	dystrobrevin, alpha
SLC12A1	solute carrier family 12 (sodium/potassium/chloride transporter), member 1
WFDC13	WAP four-disulfide core domain 13
C21orf49	chromosome 21 open reading frame 49
CPNE4	copine IV
ERCC4	excision repair cross-complementing rodent repair deficiency, complementation group 4
PRKG2	protein kinase, cGMP-dependent, type II
DSN1	DSN1, MIS12 kinetochore complex component
DCAF7	DDB1 and CUL4 associated factor 7
RAB8B	RAB8B, member RAS oncogene family
MYCBP2	MYC binding protein 2, E3 ubiquitin protein ligase
STK17B	serine/threonine kinase 17b
NSL1	NSL1, MIS12 kinetochore complex component
AK3	adenylate kinase 3
FAM149B1	family with sequence similarity 149, member B1
C2orf69	chromosome 2 open reading frame 69
RNF219	ring finger protein 219
UGT2A3	UDP glucuronosyltransferase 2 family, polypeptide A3
KIAA0825	KIAA0825
RICTOR	RPTOR independent companion of MTOR, complex 2
HS2ST1	heparan sulfate 2-O-sulfotransferase 1
RRP15	ribosomal RNA processing 15 homolog (S. cerevisiae)
HSPA2	heat shock 70kDa protein 2
SHE	Src homology 2 domain containing E
TMEM87B	transmembrane protein 87B
MARS2	methionyl-tRNA synthetase 2, mitochondrial
CDH5	cadherin 5, type 2 (vascular endothelium)
ASB8	ankyrin repeat and SOCS box containing 8
OSBPL11	oxysterol binding protein-like 11
RNF168	ring finger protein 168, E3 ubiquitin protein ligase
CROT	carnitine O-octanoyltransferase
DYRK1A	dual-specificity tyrosine-(Y)-phosphorylation regulated kinase 1A
CLDN16	claudin 16
KRTAP5-4	keratin associated protein 5-4
PPTC7	PTC7 protein phosphatase homolog (S. cerevisiae)
KIF27	kinesin family member 27
SMC6	structural maintenance of chromosomes 6
MORC3	MORC family CW-type zinc finger 3
TIGIT	T cell immunoreceptor with Ig and ITIM domains
PARD6B	par-6 family cell polarity regulator beta
C9orf57	chromosome 9 open reading frame 57
CCDC121	coiled-coil domain containing 121
FAM114A1	family with sequence similarity 114, member A1
SFTPB	surfactant protein B
GALNT7	UDP-N-acetyl-alpha-D-galactosamine:polypeptide N-acetylgalactosaminyltransferase 7 (GalNAc-T7)
CLTC	clathrin, heavy chain (Hc)
BTBD7	BTB (POZ) domain containing 7
TRAK2	trafficking protein, kinesin binding 2
RNF144A	ring finger protein 144A
SPATA5	spermatogenesis associated 5
ARHGEF9	Cdc42 guanine nucleotide exchange factor (GEF) 9
SLC4A10	solute carrier family 4, sodium bicarbonate transporter, member 10
PCSK5	proprotein convertase subtilisin/kexin type 5
GNGT1	guanine nucleotide binding protein (G protein), gamma transducing activity polypeptide 1
RSRC2	arginine/serine-rich coiled-coil 2
COA5	cytochrome c oxidase assembly factor 5
CAP2	CAP, adenylate cyclase-associated protein, 2 (yeast)
C2orf66	chromosome 2 open reading frame 66
RGS17	regulator of G-protein signaling 17
KHSRP	KH-type splicing regulatory protein
DLG1	discs, large homolog 1 (Drosophila)
NRSN1	neurensin 1
TRIM32	tripartite motif containing 32
SLC2A12	solute carrier family 2 (facilitated glucose transporter), member 12
CARF	calcium responsive transcription factor
FAM210A	family with sequence similarity 210, member A
NKX6-1	NK6 homeobox 1
PACRGL	PARK2 co-regulated-like
FRMD6	FERM domain containing 6
TFPI	tissue factor pathway inhibitor (lipoprotein-associated coagulation inhibitor)
SIX4	SIX homeobox 4
MBNL2	muscleblind-like splicing regulator 2
TMEM64	transmembrane protein 64
FLRT2	fibronectin leucine rich transmembrane protein 2
CD226	CD226 molecule
KCNK12	potassium channel, subfamily K, member 12
PUS7L	pseudouridylate synthase 7 homolog (S. cerevisiae)-like
C8orf86	chromosome 8 open reading frame 86
PPM1K	protein phosphatase, Mg2+/Mn2+ dependent, 1K
TCL1A	T-cell leukemia/lymphoma 1A
FBXW8	F-box and WD repeat domain containing 8
MBD1	methyl-CpG binding domain protein 1
PARM1	prostate androgen-regulated mucin-like protein 1
ZNF22	zinc finger protein 22
VWC2L	von Willebrand factor C domain containing protein 2-like
MBD5	methyl-CpG binding domain protein 5
SLC6A5	solute carrier family 6 (neurotransmitter transporter), member 5
RHBDD1	rhomboid domain containing 1
TRPM7	transient receptor potential cation channel, subfamily M, member 7
NUP205	nucleoporin 205kDa
HOXA13	homeobox A13
PHC3	polyhomeotic homolog 3 (Drosophila)
MFAP3L	microfibrillar-associated protein 3-like
ZNF217	zinc finger protein 217
EIF3M	eukaryotic translation initiation factor 3, subunit M
UNC5D	unc-5 homolog D (C. elegans)
MTO1	mitochondrial tRNA translation optimization 1
PDLIM5	PDZ and LIM domain 5
VMA21	VMA21 vacuolar H+-ATPase homolog (S. cerevisiae)
RASSF6	Ras association (RalGDS/AF-6) domain family member 6
ABCA10	ATP-binding cassette, sub-family A (ABC1), member 10
SLC13A1	solute carrier family 13 (sodium/sulfate symporter), member 1
CKAP2	cytoskeleton associated protein 2
ROCK2	Rho-associated, coiled-coil containing protein kinase 2
MLLT1	myeloid/lymphoid or mixed-lineage leukemia (trithorax homolog, Drosophila); translocated to, 1
TIMM21	translocase of inner mitochondrial membrane 21 homolog (yeast)
ARL14EP	ADP-ribosylation factor-like 14 effector protein
RLIM	ring finger protein, LIM domain interacting
DCP2	decapping mRNA 2
NUP50	nucleoporin 50kDa
C19orf59	chromosome 19 open reading frame 59
KIAA1467	KIAA1467
GOLGA6L6	golgin A6 family-like 6
DDO	D-aspartate oxidase
IRS2	insulin receptor substrate 2
NASP	nuclear autoantigenic sperm protein (histone-binding)
GRIA2	glutamate receptor, ionotropic, AMPA 2
ZNF432	zinc finger protein 432
TMA16	translation machinery associated 16 homolog (S. cerevisiae)
HSD17B13	hydroxysteroid (17-beta) dehydrogenase 13
HCN1	hyperpolarization activated cyclic nucleotide-gated potassium channel 1
SUB1	SUB1 homolog (S. cerevisiae)
UBE2V2	ubiquitin-conjugating enzyme E2 variant 2
AASDH	aminoadipate-semialdehyde dehydrogenase
GIMAP8	GTPase, IMAP family member 8
R3HCC1L	R3H domain and coiled-coil containing 1-like
BCO2	beta-carotene oxygenase 2
TOP2B	topoisomerase (DNA) II beta 180kDa
CASKIN1	CASK interacting protein 1
ZNF492	zinc finger protein 492
AL353791.1
DRAM1	DNA-damage regulated autophagy modulator 1
EML5	echinoderm microtubule associated protein like 5
METTL14	methyltransferase like 14
POU6F2	POU class 6 homeobox 2
ZNF587B	zinc finger protein 587B
ELF1	E74-like factor 1 (ets domain transcription factor)
ESRRG	estrogen-related receptor gamma
TMPRSS12	transmembrane (C-terminal) protease, serine 12
EPSTI1	epithelial stromal interaction 1 (breast)
ADCY7	adenylate cyclase 7
GDPD1	glycerophosphodiester phosphodiesterase domain containing 1
TACC1	transforming, acidic coiled-coil containing protein 1
GCOM1	GRINL1A complex locus 1
PLCE1	phospholipase C, epsilon 1
ZAN	zonadhesin
ZNF429	zinc finger protein 429
PABPC1	poly(A) binding protein, cytoplasmic 1
SYNDIG1L	synapse differentiation inducing 1-like
MAGEF1	melanoma antigen family F, 1
SMAD5	SMAD family member 5
EMR2	egf-like module containing, mucin-like, hormone receptor-like 2
GMNC	geminin coiled-coil domain containing
STXBP5	syntaxin binding protein 5 (tomosyn)
POLR1B	polymerase (RNA) I polypeptide B, 128kDa
BZW1	basic leucine zipper and W2 domains 1
HPCAL4	hippocalcin like 4
CTB-186H2.3	Uncharacterized protein
VAMP1	vesicle-associated membrane protein 1 (synaptobrevin 1)
SNX12	sorting nexin 12
ADAMTS18	ADAM metallopeptidase with thrombospondin type 1 motif, 18
MYD88	myeloid differentiation primary response 88
EMB	embigin
HMX3	H6 family homeobox 3
TMEM14E	transmembrane protein 14E
GPR151	G protein-coupled receptor 151
MAGT1	magnesium transporter 1
AGBL3	ATP/GTP binding protein-like 3
RIMKLB	ribosomal modification protein rimK-like family member B
MCC	mutated in colorectal cancers
MPLKIP	M-phase specific PLK1 interacting protein
STK38L	serine/threonine kinase 38 like
PHLDB2	pleckstrin homology-like domain, family B, member 2
DNAJA2	DnaJ (Hsp40) homolog, subfamily A, member 2
AMER2	APC membrane recruitment protein 2
POLR3A	polymerase (RNA) III (DNA directed) polypeptide A, 155kDa
SMIM20	small integral membrane protein 20
BTC	betacellulin
MEOX2	mesenchyme homeobox 2
PRIMA1	proline rich membrane anchor 1
IGSF1	immunoglobulin superfamily, member 1
FAM81A	family with sequence similarity 81, member A
ZNF660	zinc finger protein 660
FAM208A	family with sequence similarity 208, member A
GDNF	glial cell derived neurotrophic factor
LRRC8B	leucine rich repeat containing 8 family, member B
CNOT6	CCR4-NOT transcription complex, subunit 6
TTC3	tetratricopeptide repeat domain 3
ZNF548	zinc finger protein 548
MAML1	mastermind-like 1 (Drosophila)
C2CD4A	C2 calcium-dependent domain containing 4A
SHH	sonic hedgehog
VAPA	VAMP (vesicle-associated membrane protein)-associated protein A, 33kDa
RAD54B	RAD54 homolog B (S. cerevisiae)
NOTCH2NL	notch 2 N-terminal like
ANKRD34C	ankyrin repeat domain 34C
CUBN	cubilin (intrinsic factor-cobalamin receptor)
SCRN1	secernin 1
MMP16	matrix metallopeptidase 16 (membrane-inserted)
MYH10	myosin, heavy chain 10, non-muscle
ARL6	ADP-ribosylation factor-like 6
GPR135	G protein-coupled receptor 135
FAM76B	family with sequence similarity 76, member B
SBNO1	strawberry notch homolog 1 (Drosophila)
C5orf63	chromosome 5 open reading frame 63
ACTN2	actinin, alpha 2
MRO	maestro
SUCO	SUN domain containing ossification factor
DMRT2	doublesex and mab-3 related transcription factor 2
RAB3IP	RAB3A interacting protein
KIAA1737	KIAA1737
RORA	RAR-related orphan receptor A
RASSF8	Ras association (RalGDS/AF-6) domain family (N-terminal) member 8
SCN7A	sodium channel, voltage-gated, type VII, alpha subunit
MEIS1	Meis homeobox 1
RNF6	ring finger protein (C3H2C3 type) 6
ZIC3	Zic family member 3
SERPINB13	serpin peptidase inhibitor, clade B (ovalbumin), member 13
OSTN	osteocrin
RNF166	ring finger protein 166
FREM3	FRAS1 related extracellular matrix 3
FRS2	fibroblast growth factor receptor substrate 2
DNAJC27	DnaJ (Hsp40) homolog, subfamily C, member 27
RSRC1	arginine/serine-rich coiled-coil 1
MTMR9	myotubularin related protein 9
NBR1	neighbor of BRCA1 gene 1
RNF152	ring finger protein 152
SEMA3E	sema domain, immunoglobulin domain (Ig), short basic domain, secreted, (semaphorin) 3E
FAM102B	family with sequence similarity 102, member B
CDKAL1	CDK5 regulatory subunit associated protein 1-like 1
SYDE2	synapse defective 1, Rho GTPase, homolog 2 (C. elegans)
USP13	ubiquitin specific peptidase 13 (isopeptidase T-3)
KCNJ10	potassium inwardly-rectifying channel, subfamily J, member 10
FCRL3	Fc receptor-like 3
DNAJB12	DnaJ (Hsp40) homolog, subfamily B, member 12
SPAST	spastin
GRPEL2	GrpE-like 2, mitochondrial (E. coli)
B3GAT2	beta-1,3-glucuronyltransferase 2 (glucuronosyltransferase S)
PLEKHG1	pleckstrin homology domain containing, family G (with RhoGef domain) member 1
MOB1B	MOB kinase activator 1B
LHX9	LIM homeobox 9
RNF141	ring finger protein 141
PUM1	pumilio RNA-binding family member 1
TPD52L3	tumor protein D52-like 3
GOLGA6D	golgin A6 family, member D
MPP7	membrane protein, palmitoylated 7 (MAGUK p55 subfamily member 7)
IFRG15	Homo sapiens torsin A interacting protein 2 (TOR1AIP2), transcript variant 1, mRNA.
RNF111	ring finger protein 111
MAK	male germ cell-associated kinase
SLC35F5	solute carrier family 35, member F5
HMGCS1	3-hydroxy-3-methylglutaryl-CoA synthase 1 (soluble)
WIPF1	WAS/WASL interacting protein family, member 1
PKHD1	polycystic kidney and hepatic disease 1 (autosomal recessive)
TMEM25	transmembrane protein 25
CD28	CD28 molecule
KLHL6	kelch-like family member 6
STXBP4	syntaxin binding protein 4
FMO2	flavin containing monooxygenase 2 (non-functional)
PAFAH1B2	platelet-activating factor acetylhydrolase 1b, catalytic subunit 2 (30kDa)
CBL	Cbl proto-oncogene, E3 ubiquitin protein ligase
SLC36A4	solute carrier family 36 (proton/amino acid symporter), member 4
ZDHHC20	zinc finger, DHHC-type containing 20
ZNF160	zinc finger protein 160
RNF180	ring finger protein 180
ARAP2	ArfGAP with RhoGAP domain, ankyrin repeat and PH domain 2
NFAT5	nuclear factor of activated T-cells 5, tonicity-responsive
DZIP1	DAZ interacting zinc finger protein 1
EPGN	epithelial mitogen
CLVS2	clavesin 2
SCN10A	sodium channel, voltage-gated, type X, alpha subunit
TIGD3	tigger transposable element derived 3
SLC30A8	solute carrier family 30 (zinc transporter), member 8
OLIG2	oligodendrocyte lineage transcription factor 2
STXBP5L	syntaxin binding protein 5-like
LONRF2	LON peptidase N-terminal domain and ring finger 2
PGRMC2	progesterone receptor membrane component 2
XIAP	X-linked inhibitor of apoptosis
ACOT9	acyl-CoA thioesterase 9
TBC1D8B	TBC1 domain family, member 8B (with GRAM domain)
SV2B	synaptic vesicle glycoprotein 2B
HNRNPA3	heterogeneous nuclear ribonucleoprotein A3
SMEK2	SMEK homolog 2, suppressor of mek1 (Dictyostelium)
SERPINB9	serpin peptidase inhibitor, clade B (ovalbumin), member 9
CYP3A4	cytochrome P450, family 3, subfamily A, polypeptide 4
RP11-268J15.5
DUSP18	dual specificity phosphatase 18
DIP2C	DIP2 disco-interacting protein 2 homolog C (Drosophila)
RBM41	RNA binding motif protein 41
GALNT3	UDP-N-acetyl-alpha-D-galactosamine:polypeptide N-acetylgalactosaminyltransferase 3 (GalNAc-T3)
RP11-422N16.3	Uncharacterized protein
ZBTB43	zinc finger and BTB domain containing 43
TP53INP1	tumor protein p53 inducible nuclear protein 1
HNRNPLL	heterogeneous nuclear ribonucleoprotein L-like
NAPG	N-ethylmaleimide-sensitive factor attachment protein, gamma
CDK6	cyclin-dependent kinase 6
ZBTB6	zinc finger and BTB domain containing 6
AFF4	AF4/FMR2 family, member 4
FBXO30	F-box protein 30
TMCC1	transmembrane and coiled-coil domain family 1
ANKH	ANKH inorganic pyrophosphate transport regulator
ZBTB16	zinc finger and BTB domain containing 16
CCDC50	coiled-coil domain containing 50
NAP1L3	nucleosome assembly protein 1-like 3
NTN4	netrin 4
CHST15	carbohydrate (N-acetylgalactosamine 4-sulfate 6-O) sulfotransferase 15
RCOR3	REST corepressor 3
HIST1H2BF	histone cluster 1, H2bf
TMED7	transmembrane emp24 protein transport domain containing 7
DBT	dihydrolipoamide branched chain transacylase E2
CCNT2	cyclin T2
UQCRFS1	ubiquinol-cytochrome c reductase, Rieske iron-sulfur polypeptide 1
IL7R	interleukin 7 receptor
THBS2	thrombospondin 2
PRMT10	protein arginine methyltransferase 10 (putative)
CAMK4	calcium/calmodulin-dependent protein kinase IV
TXNRD1	thioredoxin reductase 1
GJA9	gap junction protein, alpha 9, 59kDa
SLCO4C1	solute carrier organic anion transporter family, member 4C1
STX7	syntaxin 7
TRIM40	tripartite motif containing 40
ZMAT3	zinc finger, matrin-type 3
ACAP2	ArfGAP with coiled-coil, ankyrin repeat and PH domains 2
KPNB1	karyopherin (importin) beta 1
RALGAPB	Ral GTPase activating protein, beta subunit (non-catalytic)
ZNF41	zinc finger protein 41
PCP4L1	Purkinje cell protein 4 like 1
MFSD9	major facilitator superfamily domain containing 9
VPS4B	vacuolar protein sorting 4 homolog B (S. cerevisiae)
OGN	osteoglycin
STARD7	StAR-related lipid transfer (START) domain containing 7
MEX3B	mex-3 RNA binding family member B
SLC30A6	solute carrier family 30 (zinc transporter), member 6
SMIM15	small integral membrane protein 15
GPR75	G protein-coupled receptor 75
ZNF343	zinc finger protein 343
TMEM35	transmembrane protein 35
ZNF716	zinc finger protein 716
SLC24A4	solute carrier family 24 (sodium/potassium/calcium exchanger), member 4
LYPLA1	lysophospholipase I
PCDH19	protocadherin 19
ETV6	ets variant 6
PPM1E	protein phosphatase, Mg2+/Mn2+ dependent, 1E
NUDT16	nudix (nucleoside diphosphate linked moiety X)-type motif 16
SPAG9	sperm associated antigen 9
MCU	mitochondrial calcium uniporter
BCLAF1	BCL2-associated transcription factor 1
C11orf87	chromosome 11 open reading frame 87
DPF3	D4, zinc and double PHD fingers, family 3
PPP3CA	protein phosphatase 3, catalytic subunit, alpha isozyme
ABTB2	ankyrin repeat and BTB (POZ) domain containing 2
IPCEF1	interaction protein for cytohesin exchange factors 1
PIP4K2C	phosphatidylinositol-5-phosphate 4-kinase, type II, gamma
PALM2	paralemmin 2
FGD5	FYVE, RhoGEF and PH domain containing 5
TLR10	toll-like receptor 10
HOXC8	homeobox C8
F2R	coagulation factor II (thrombin) receptor
DHX40	DEAH (Asp-Glu-Ala-His) box polypeptide 40
SERINC5	serine incorporator 5
ARL4C	ADP-ribosylation factor-like 4C
SLC16A1	solute carrier family 16 (monocarboxylate transporter), member 1
FRRS1	ferric-chelate reductase 1
MARC2	mitochondrial amidoxime reducing component 2
CSPP1	centrosome and spindle pole associated protein 1
PRDM5	PR domain containing 5
LMOD3	leiomodin 3 (fetal)
ITK	IL2-inducible T-cell kinase
ZNF93	zinc finger protein 93
LCORL	ligand dependent nuclear receptor corepressor-like
RNF150	ring finger protein 150
HOXA4	homeobox A4
TTC17	tetratricopeptide repeat domain 17
RAD51L3-RFFL	Uncharacterized protein
SCAF8	SR-related CTD-associated factor 8
HS6ST2	heparan sulfate 6-O-sulfotransferase 2
SLC12A2	solute carrier family 12 (sodium/potassium/chloride transporter), member 2
XAF1	XIAP associated factor 1
UGT2A2	UDP glucuronosyltransferase 2 family, polypeptide A2
SLC9A4	solute carrier family 9, subfamily A (NHE4, cation proton antiporter 4), member 4
XG	Xg blood group
COA4	cytochrome c oxidase assembly factor 4 homolog (S. cerevisiae)
SPATA6	spermatogenesis associated 6
ANKRD12	ankyrin repeat domain 12
ZCWPW2	zinc finger, CW type with PWWP domain 2
ING1	inhibitor of growth family, member 1
UBE2K	ubiquitin-conjugating enzyme E2K
FAM160A1	family with sequence similarity 160, member A1
PAICS	phosphoribosylaminoimidazole carboxylase, phosphoribosylaminoimidazole succinocarboxamide synthetase
SAP30L	SAP30-like
CEP135	centrosomal protein 135kDa
MED8	mediator complex subunit 8
C6orf136	chromosome 6 open reading frame 136
PDP2	pyruvate dehyrogenase phosphatase catalytic subunit 2
PHTF2	putative homeodomain transcription factor 2
ST6GALNAC3	ST6 (alpha-N-acetyl-neuraminyl-2,3-beta-galactosyl-1,3)-N-acetylgalactosaminide alpha-2,6-sialyltransferase 3
NLGN4X	neuroligin 4, X-linked
CCNJ	cyclin J
ZFP1	ZFP1 zinc finger protein
CUX2	cut-like homeobox 2
DKK2	dickkopf WNT signaling pathway inhibitor 2
ZNF300	zinc finger protein 300
CNGB3	cyclic nucleotide gated channel beta 3
RPS6KA6	ribosomal protein S6 kinase, 90kDa, polypeptide 6
SETD7	SET domain containing (lysine methyltransferase) 7
TTC26	tetratricopeptide repeat domain 26
C9orf72	chromosome 9 open reading frame 72
CEBPG	CCAAT/enhancer binding protein (C/EBP), gamma
DDX52	DEAD (Asp-Glu-Ala-Asp) box polypeptide 52
MOCS3	molybdenum cofactor synthesis 3
ESR2	estrogen receptor 2 (ER beta)
LEPROT	leptin receptor overlapping transcript
SLC25A40	solute carrier family 25, member 40
NADK2	NAD kinase 2, mitochondrial
RAB11FIP2	RAB11 family interacting protein 2 (class I)
FSBP	fibrinogen silencer binding protein
CNTLN	centlein, centrosomal protein
ALDH3A2	aldehyde dehydrogenase 3 family, member A2
NUPL2	nucleoporin like 2
ATXN7L3B	ataxin 7-like 3B
TRIM58	tripartite motif containing 58
TRIO	trio Rho guanine nucleotide exchange factor
NDST3	N-deacetylase/N-sulfotransferase (heparan glucosaminyl) 3
FAM65B	family with sequence similarity 65, member B
PM20D2	peptidase M20 domain containing 2
DIP2A	DIP2 disco-interacting protein 2 homolog A (Drosophila)
N4BP2L2	NEDD4 binding protein 2-like 2
PARP8	poly (ADP-ribose) polymerase family, member 8
G3BP2	GTPase activating protein (SH3 domain) binding protein 2
ACBD3	acyl-CoA binding domain containing 3
FAM49A	family with sequence similarity 49, member A
HEATR5A	HEAT repeat containing 5A
ZNF674	zinc finger protein 674
GALR1	galanin receptor 1
TARDBP	TAR DNA binding protein
ZNF430	zinc finger protein 430
C21orf91	chromosome 21 open reading frame 91
ANKRD45	ankyrin repeat domain 45
USP24	ubiquitin specific peptidase 24
ZNF383	zinc finger protein 383
FOXN3	forkhead box N3
ZXDC	ZXD family zinc finger C
BAK1	BCL2-antagonist/killer 1
TESPA1	thymocyte expressed, positive selection associated 1
GFPT1	glutamine--fructose-6-phosphate transaminase 1
EFNB1	ephrin-B1
PLD5	phospholipase D family, member 5
TSPAN2	tetraspanin 2
AC008394.1	Uncharacterized protein
IRAK3	interleukin-1 receptor-associated kinase 3
HDHD2	haloacid dehalogenase-like hydrolase domain containing 2
IPP	intracisternal A particle-promoted polypeptide
SLC35E3	solute carrier family 35, member E3
TXNDC15	thioredoxin domain containing 15
BTBD3	BTB (POZ) domain containing 3
CLK1	CDC-like kinase 1
CDH8	cadherin 8, type 2
TMEM236
TMEM236	transmembrane protein 236
TBC1D32	TBC1 domain family, member 32
DLGAP2	discs, large (Drosophila) homolog-associated protein 2
RCAN2	regulator of calcineurin 2
SLC7A2	solute carrier family 7 (cationic amino acid transporter, y+ system), member 2
PIK3R3	phosphoinositide-3-kinase, regulatory subunit 3 (gamma)
HIST1H2BD	histone cluster 1, H2bd
CHMP3	charged multivesicular body protein 3
C10orf32	chromosome 10 open reading frame 32
CORO1C	coronin, actin binding protein, 1C
B3GALTL	beta 1,3-galactosyltransferase-like
TOX3	TOX high mobility group box family member 3
ITGA8	integrin, alpha 8
CXCR4	chemokine (C-X-C motif) receptor 4
POFUT1	protein O-fucosyltransferase 1
SUV39H2	suppressor of variegation 3-9 homolog 2 (Drosophila)
NCAM1	neural cell adhesion molecule 1
SYT10	synaptotagmin X
C17orf104	chromosome 17 open reading frame 104
TRIM23	tripartite motif containing 23
AC079354.1	uncharacterized protein KIAA2012
PFKFB3	6-phosphofructo-2-kinase/fructose-2,6-biphosphatase 3
PAK2	p21 protein (Cdc42/Rac)-activated kinase 2
ZDHHC18	zinc finger, DHHC-type containing 18
SERINC1	serine incorporator 1
CEP41	centrosomal protein 41kDa
ZNF426	zinc finger protein 426
VPS37A	vacuolar protein sorting 37 homolog A (S. cerevisiae)
GPALPP1	GPALPP motifs containing 1
RFFL	ring finger and FYVE-like domain containing E3 ubiquitin protein ligase
H2AFV	H2A histone family, member V
RAP2C	RAP2C, member of RAS oncogene family
TOR1AIP2	torsin A interacting protein 2
SLC2A14	solute carrier family 2 (facilitated glucose transporter), member 14
COL6A5	collagen, type VI, alpha 5
KCNE4	potassium voltage-gated channel, Isk-related family, member 4
PKP1	plakophilin 1 (ectodermal dysplasia/skin fragility syndrome)
CRAMP1L	Crm, cramped-like (Drosophila)
PATL1	protein associated with topoisomerase II homolog 1 (yeast)
EDA2R	ectodysplasin A2 receptor
PRKAA2	protein kinase, AMP-activated, alpha 2 catalytic subunit
MCM9	minichromosome maintenance complex component 9
NCBP1	nuclear cap binding protein subunit 1, 80kDa
AR	androgen receptor
NUP153	nucleoporin 153kDa
C8orf4	chromosome 8 open reading frame 4
SERPINB5	serpin peptidase inhibitor, clade B (ovalbumin), member 5
ENDOD1	endonuclease domain containing 1
ZNF486	zinc finger protein 486
C18orf21	chromosome 18 open reading frame 21
PTPN4	protein tyrosine phosphatase, non-receptor type 4 (megakaryocyte)
GDE1	glycerophosphodiester phosphodiesterase 1
USP53	ubiquitin specific peptidase 53
KMO	kynurenine 3-monooxygenase (kynurenine 3-hydroxylase)
DAB1	Dab, reelin signal transducer, homolog 1 (Drosophila)
TGFBR3	transforming growth factor, beta receptor III
RNF145	ring finger protein 145
LTN1	listerin E3 ubiquitin protein ligase 1
MYOCD	myocardin
MECOM	MDS1 and EVI1 complex locus
KIAA1715	KIAA1715
MUM1L1	melanoma associated antigen (mutated) 1-like 1
LPP	LIM domain containing preferred translocation partner in lipoma
ZNF354C	zinc finger protein 354C
RAB27B	RAB27B, member RAS oncogene family
MC2R	melanocortin 2 receptor (adrenocorticotropic hormone)
RNF103-CHMP3	RNF103-CHMP3 readthrough
SLC45A4	solute carrier family 45, member 4
EFCAB14	EF-hand calcium binding domain 14
METTL9	methyltransferase like 9
LONP2	lon peptidase 2, peroxisomal
WNT9B	wingless-type MMTV integration site family, member 9B
DPP8	dipeptidyl-peptidase 8
CCNT1	cyclin T1
ZC3H18	zinc finger CCCH-type containing 18
NHS	Nance-Horan syndrome (congenital cataracts and dental anomalies)
ITGA2	integrin, alpha 2 (CD49B, alpha 2 subunit of VLA-2 receptor)
GRIN2B	glutamate receptor, ionotropic, N-methyl D-aspartate 2B
TBC1D31	TBC1 domain family, member 31
UBR1	ubiquitin protein ligase E3 component n-recognin 1
TBC1D12	TBC1 domain family, member 12
MCF2L2	MCF.2 cell line derived transforming sequence-like 2
RPL12	ribosomal protein L12
ADIPOR2	adiponectin receptor 2
AGO3	argonaute RISC catalytic component 3
CD302	CD302 molecule
HACE1	HECT domain and ankyrin repeat containing E3 ubiquitin protein ligase 1
SRSF12	serine/arginine-rich splicing factor 12
ZNF148	zinc finger protein 148
SLC4A7	solute carrier family 4, sodium bicarbonate cotransporter, member 7
WRN	Werner syndrome, RecQ helicase-like
MBNL3	muscleblind-like splicing regulator 3
UMODL1	uromodulin-like 1
KIAA2018	KIAA2018
SUSD5	sushi domain containing 5
CTAGE1	cutaneous T-cell lymphoma-associated antigen 1
IFI44L	interferon-induced protein 44-like
RBM24	RNA binding motif protein 24
ZNF418	zinc finger protein 418
ARPP19	cAMP-regulated phosphoprotein, 19kDa
WDR37	WD repeat domain 37
ABT1	activator of basal transcription 1
SKA2	spindle and kinetochore associated complex subunit 2
NR2C2	nuclear receptor subfamily 2, group C, member 2
LRRC40	leucine rich repeat containing 40
GLRA3	glycine receptor, alpha 3
CREM	cAMP responsive element modulator
NOTCH3	notch 3
SLC40A1	solute carrier family 40 (iron-regulated transporter), member 1
ZNF460	zinc finger protein 460
CCRN4L	CCR4 carbon catabolite repression 4-like (S. cerevisiae)
CPS1	carbamoyl-phosphate synthase 1, mitochondrial
TACR3	tachykinin receptor 3
PIKFYVE	phosphoinositide kinase, FYVE finger containing
SLC7A11	solute carrier family 7 (anionic amino acid transporter light chain, xc- system), member 11
PRMT6	protein arginine methyltransferase 6
PRDX6	peroxiredoxin 6
SPAG16	sperm associated antigen 16
LRRC58	leucine rich repeat containing 58
PGK1	phosphoglycerate kinase 1
ITPR1	inositol 1,4,5-trisphosphate receptor, type 1
CASP3	caspase 3, apoptosis-related cysteine peptidase
FGF11	fibroblast growth factor 11
URGCP	upregulator of cell proliferation
FAM161A	family with sequence similarity 161, member A
CAPN7	calpain 7
ZNF280D	zinc finger protein 280D
EIF3A	eukaryotic translation initiation factor 3, subunit A
CTSS	cathepsin S
SPPL2A	signal peptide peptidase like 2A
EPS15	epidermal growth factor receptor pathway substrate 15
PKNOX1	PBX/knotted 1 homeobox 1
SIM1	single-minded homolog 1 (Drosophila)
PVRL3	poliovirus receptor-related 3
GUF1	GUF1 GTPase homolog (S. cerevisiae)
NIP7	NIP7, nucleolar pre-rRNA processing protein
WHSC1L1	Wolf-Hirschhorn syndrome candidate 1-like 1
C4orf46	chromosome 4 open reading frame 46
ACTR3	ARP3 actin-related protein 3 homolog (yeast)
EGF	epidermal growth factor
NEIL2	nei endonuclease VIII-like 2 (E. coli)
DDX6	DEAD (Asp-Glu-Ala-Asp) box helicase 6
ZC3H12B	zinc finger CCCH-type containing 12B
LRRC7	leucine rich repeat containing 7
NPNT	nephronectin
BAI3	brain-specific angiogenesis inhibitor 3
INPP4B	inositol polyphosphate-4-phosphatase, type II, 105kDa
RAB11FIP1	RAB11 family interacting protein 1 (class I)
NRIP1	nuclear receptor interacting protein 1
ITSN1	intersectin 1 (SH3 domain protein)
CBLL1	Cbl proto-oncogene-like 1, E3 ubiquitin protein ligase
GAB1	GRB2-associated binding protein 1
EIF1AX	eukaryotic translation initiation factor 1A, X-linked
PPP1R12B	protein phosphatase 1, regulatory subunit 12B
KBTBD2	kelch repeat and BTB (POZ) domain containing 2
NDST4	N-deacetylase/N-sulfotransferase (heparan glucosaminyl) 4
VASH2	vasohibin 2
WAPAL	wings apart-like homolog (Drosophila)
SMIM7	small integral membrane protein 7
NUDT5	nudix (nucleoside diphosphate linked moiety X)-type motif 5
CDKN2B	cyclin-dependent kinase inhibitor 2B (p15, inhibits CDK4)
PIP4K2A	phosphatidylinositol-5-phosphate 4-kinase, type II, alpha
MXD1	MAX dimerization protein 1
LIPN	lipase, family member N
KLF6	Kruppel-like factor 6
HTR1F	5-hydroxytryptamine (serotonin) receptor 1F, G protein-coupled
TBC1D4	TBC1 domain family, member 4
PHACTR4	phosphatase and actin regulator 4
STON2	stonin 2
PRPF38A	pre-mRNA processing factor 38A
ZBTB37	zinc finger and BTB domain containing 37
C5orf24	chromosome 5 open reading frame 24
LMBRD2	LMBR1 domain containing 2
AP1S3	adaptor-related protein complex 1, sigma 3 subunit
ENPEP	glutamyl aminopeptidase (aminopeptidase A)
CCDC6	coiled-coil domain containing 6
PSPH	phosphoserine phosphatase
NAPB	N-ethylmaleimide-sensitive factor attachment protein, beta
SLC25A21	solute carrier family 25 (mitochondrial oxoadipate carrier), member 21
KBTBD7	kelch repeat and BTB (POZ) domain containing 7
IARS	isoleucyl-tRNA synthetase
RRP36	ribosomal RNA processing 36 homolog (S. cerevisiae)
ZNF483	zinc finger protein 483
SLC41A2	solute carrier family 41 (magnesium transporter), member 2
PKP4	plakophilin 4
NT5C2	5'-nucleotidase, cytosolic II
LMLN	leishmanolysin-like (metallopeptidase M8 family)
MAP10	microtubule-associated protein 10
GOLGA2	golgin A2
IL22RA2	interleukin 22 receptor, alpha 2
NLGN1	neuroligin 1
ADAMTS5	ADAM metallopeptidase with thrombospondin type 1 motif, 5
CCDC85A	coiled-coil domain containing 85A
CTXN2	cortexin 2
SYNJ1	synaptojanin 1
WDR12	WD repeat domain 12
ASXL2	additional sex combs like 2 (Drosophila)
ARL10	ADP-ribosylation factor-like 10
C2CD4B	C2 calcium-dependent domain containing 4B
SORBS2	sorbin and SH3 domain containing 2
SYCP2	synaptonemal complex protein 2
MED1	mediator complex subunit 1
TRIM4	tripartite motif containing 4
SLC30A1	solute carrier family 30 (zinc transporter), member 1
ARF6	ADP-ribosylation factor 6
RNASEH2C	ribonuclease H2, subunit C
RAB3B	RAB3B, member RAS oncogene family
KCTD12	potassium channel tetramerization domain containing 12
PTBP3	polypyrimidine tract binding protein 3
GTF3C4	general transcription factor IIIC, polypeptide 4, 90kDa
RBBP9	retinoblastoma binding protein 9
TNFSF13B	tumor necrosis factor (ligand) superfamily, member 13b
ZNF135	zinc finger protein 135
SLITRK2	SLIT and NTRK-like family, member 2
KIAA1456	KIAA1456
NKIRAS1	NFKB inhibitor interacting Ras-like 1
SLC35B4	solute carrier family 35 (UDP-xylose/UDP-N-acetylglucosamine transporter), member B4
IKZF1	IKAROS family zinc finger 1 (Ikaros)
HECW2	HECT, C2 and WW domain containing E3 ubiquitin protein ligase 2
OXSR1	oxidative stress responsive 1
LIN7A	lin-7 homolog A (C. elegans)
RPS3	ribosomal protein S3
CRISPLD1	cysteine-rich secretory protein LCCL domain containing 1
FOXG1	forkhead box G1
PROX1	prospero homeobox 1
MPDZ	multiple PDZ domain protein
ERI2	ERI1 exoribonuclease family member 2
ZNF410	zinc finger protein 410
NUPL1	nucleoporin like 1
ZNF562	zinc finger protein 562
FAM118A	family with sequence similarity 118, member A
GUCA1B	guanylate cyclase activator 1B (retina)
TMED7-TICAM2	TMED7-TICAM2 readthrough
ZNF695	zinc finger protein 695
CEP120	centrosomal protein 120kDa
WT1	Wilms tumor 1
SFMBT2	Scm-like with four mbt domains 2
OPCML	opioid binding protein/cell adhesion molecule-like
PTEN	phosphatase and tensin homolog
KIT	v-kit Hardy-Zuckerman 4 feline sarcoma viral oncogene homolog
PABPC4L	poly(A) binding protein, cytoplasmic 4-like
CIAO1	cytosolic iron-sulfur protein assembly 1
C22orf46	chromosome 22 open reading frame 46
MIDN	midnolin
FAM169B	family with sequence similarity 169, member B
UBE2QL1	ubiquitin-conjugating enzyme E2Q family-like 1
FGFR1OP	FGFR1 oncogene partner
EXOSC2	exosome component 2
PAQR3	progestin and adipoQ receptor family member III
MAN1C1	mannosidase, alpha, class 1C, member 1
RAD18	RAD18 homolog (S. cerevisiae)
AGTPBP1	ATP/GTP binding protein 1
GTPBP4	GTP binding protein 4
RNF121	ring finger protein 121
CHML	choroideremia-like (Rab escort protein 2)
KLHL11	kelch-like family member 11
MPP5	membrane protein, palmitoylated 5 (MAGUK p55 subfamily member 5)
KIAA1244	KIAA1244
IRF4	interferon regulatory factor 4
CXCL9	chemokine (C-X-C motif) ligand 9
TSHR	thyroid stimulating hormone receptor
ZFP36	ZFP36 ring finger protein
PDK4	pyruvate dehydrogenase kinase, isozyme 4
TNR	tenascin R
LMBR1	limb development membrane protein 1
SV2C	synaptic vesicle glycoprotein 2C
IKZF2	IKAROS family zinc finger 2 (Helios)
GABRA3	gamma-aminobutyric acid (GABA) A receptor, alpha 3
RASAL2	RAS protein activator like 2
TGS1	trimethylguanosine synthase 1
KCTD11	potassium channel tetramerization domain containing 11
EPHA5	EPH receptor A5
ANGPT1	angiopoietin 1
PEX2	peroxisomal biogenesis factor 2
ACSL4	acyl-CoA synthetase long-chain family member 4
SPATA13	spermatogenesis associated 13
C8orf47	chromosome 8 open reading frame 47
DMXL1	Dmx-like 1
THAP6	THAP domain containing 6
ALG10B	ALG10B, alpha-1,2-glucosyltransferase
RABGEF1	RAB guanine nucleotide exchange factor (GEF) 1
NIN	ninein (GSK3B interacting protein)
KLHL24	kelch-like family member 24
TYW3	tRNA-yW synthesizing protein 3 homolog (S. cerevisiae)
GLIS3	GLIS family zinc finger 3
GGPS1	geranylgeranyl diphosphate synthase 1
ANO6	anoctamin 6
TNFRSF11A	tumor necrosis factor receptor superfamily, member 11a, NFKB activator
DNAJC16	DnaJ (Hsp40) homolog, subfamily C, member 16
AC012215.1	Uncharacterized protein
PTH2R	parathyroid hormone 2 receptor
ZNF800	zinc finger protein 800
PELI2	pellino E3 ubiquitin protein ligase family member 2
AP3M2	adaptor-related protein complex 3, mu 2 subunit
PDCL3	phosducin-like 3
SEPT6	septin 6
HMGB1	high mobility group box 1
PDE4DIP	phosphodiesterase 4D interacting protein
MARCH5	membrane-associated ring finger (C3HC4) 5
ACER3	alkaline ceramidase 3
PHF8	PHD finger protein 8
KLHL42	kelch-like family member 42
EIF3J	eukaryotic translation initiation factor 3, subunit J
DSTYK	dual serine/threonine and tyrosine protein kinase
GALNT15	UDP-N-acetyl-alpha-D-galactosamine:polypeptide N-acetylgalactosaminyltransferase 15
SEPT2	septin 2
ITGB3BP	integrin beta 3 binding protein (beta3-endonexin)
GJA5	gap junction protein, alpha 5, 40kDa
GNAO1	guanine nucleotide binding protein (G protein), alpha activating activity polypeptide O
PTPRZ1	protein tyrosine phosphatase, receptor-type, Z polypeptide 1
SYAP1	synapse associated protein 1
IMPG1	interphotoreceptor matrix proteoglycan 1
BBX	bobby sox homolog (Drosophila)
ZXDA	zinc finger, X-linked, duplicated A
MCM10	minichromosome maintenance complex component 10
MCM4	minichromosome maintenance complex component 4
SOD2	superoxide dismutase 2, mitochondrial
AIMP1	aminoacyl tRNA synthetase complex-interacting multifunctional protein 1
DOT1L	DOT1-like histone H3K79 methyltransferase
TSPAN12	tetraspanin 12
SNAP25	synaptosomal-associated protein, 25kDa
KIDINS220	kinase D-interacting substrate, 220kDa
FAM206A	family with sequence similarity 206, member A
ZDHHC15	zinc finger, DHHC-type containing 15
C11orf74	chromosome 11 open reading frame 74
RNF217	ring finger protein 217
KDM5A	lysine (K)-specific demethylase 5A
KIF3A	kinesin family member 3A
SRSF3	serine/arginine-rich splicing factor 3
IL11	interleukin 11
ATP13A3	ATPase type 13A3
MBP	myelin basic protein
TRAF6	TNF receptor-associated factor 6, E3 ubiquitin protein ligase
ZNF283	zinc finger protein 283
RACGAP1	Rac GTPase activating protein 1
DNAJC3	DnaJ (Hsp40) homolog, subfamily C, member 3
ZBTB44	zinc finger and BTB domain containing 44
ATG13	autophagy related 13
TAOK3	TAO kinase 3
VPS35	vacuolar protein sorting 35 homolog (S. cerevisiae)
BICD1	bicaudal D homolog 1 (Drosophila)
NEK9	NIMA-related kinase 9
GPR158	G protein-coupled receptor 158
STYK1	serine/threonine/tyrosine kinase 1
MKNK2	MAP kinase interacting serine/threonine kinase 2
SORBS1	sorbin and SH3 domain containing 1
TMEM161B	transmembrane protein 161B
AVPR1A	arginine vasopressin receptor 1A
GNA11	guanine nucleotide binding protein (G protein), alpha 11 (Gq class)
ZNF347	zinc finger protein 347
ZNRF2	zinc and ring finger 2
SSX2IP	synovial sarcoma, X breakpoint 2 interacting protein
MCOLN2	mucolipin 2
RBM12	RNA binding motif protein 12
CNTFR	ciliary neurotrophic factor receptor
GXYLT1	glucoside xylosyltransferase 1
ZBTB21	zinc finger and BTB domain containing 21
ENC1	ectodermal-neural cortex 1 (with BTB domain)
KIF6	kinesin family member 6
ZBTB26	zinc finger and BTB domain containing 26
C11orf58	chromosome 11 open reading frame 58
RUFY2	RUN and FYVE domain containing 2
CEP152	centrosomal protein 152kDa
CAPN14	calpain 14
KANK2	KN motif and ankyrin repeat domains 2
G3BP1	GTPase activating protein (SH3 domain) binding protein 1
SLCO2B1	solute carrier organic anion transporter family, member 2B1
RPF2	ribosome production factor 2 homolog (S. cerevisiae)
RRAS2	related RAS viral (r-ras) oncogene homolog 2
MLK4	Mitogen-activated protein kinase kinase kinase MLK4
CHODL	chondrolectin
PGAP1	post-GPI attachment to proteins 1
MCTP2	multiple C2 domains, transmembrane 2
BICC1	bicaudal C homolog 1 (Drosophila)
NEK3	NIMA-related kinase 3
ONECUT2	one cut homeobox 2
THAP2	THAP domain containing, apoptosis associated protein 2
CDC42EP3	CDC42 effector protein (Rho GTPase binding) 3
WDFY1	WD repeat and FYVE domain containing 1
FNDC3A	fibronectin type III domain containing 3A
AP5M1	adaptor-related protein complex 5, mu 1 subunit
ZNF320	zinc finger protein 320
QKI	QKI, KH domain containing, RNA binding
DIAPH2	diaphanous-related formin 2
SLC10A7	solute carrier family 10, member 7
KCTD7	potassium channel tetramerization domain containing 7
PPFIA2	protein tyrosine phosphatase, receptor type, f polypeptide (PTPRF), interacting protein (liprin), alpha 2
RNMT	RNA (guanine-7-) methyltransferase
MKL2	MKL/myocardin-like 2
TGFB2	transforming growth factor, beta 2
ZFP69B	ZFP69 zinc finger protein B
ANKS6	ankyrin repeat and sterile alpha motif domain containing 6
FAM126A	family with sequence similarity 126, member A
CLCN5	chloride channel, voltage-sensitive 5
FBN1	fibrillin 1
HMGCR	3-hydroxy-3-methylglutaryl-CoA reductase
CAND1	cullin-associated and neddylation-dissociated 1
COL5A2	collagen, type V, alpha 2
DYNLL2	dynein, light chain, LC8-type 2
RAN	RAN, member RAS oncogene family
RP11-383H13.1	Protein LOC100132891; cDNA FLJ53548
SNAP29	synaptosomal-associated protein, 29kDa
RALGPS1	Ral GEF with PH domain and SH3 binding motif 1
GPM6A	glycoprotein M6A
SLC25A28	solute carrier family 25 (mitochondrial iron transporter), member 28
TMEM44	transmembrane protein 44
ART4	ADP-ribosyltransferase 4
ZNF689	zinc finger protein 689
NAMPT	nicotinamide phosphoribosyltransferase
TRPM8	transient receptor potential cation channel, subfamily M, member 8
VANGL1	VANGL planar cell polarity protein 1
NOP14	NOP14 nucleolar protein
GPAM	glycerol-3-phosphate acyltransferase, mitochondrial
ZMYM2	zinc finger, MYM-type 2
LRCH3	leucine-rich repeats and calponin homology (CH) domain containing 3
PRMT3	protein arginine methyltransferase 3
ZNF780B	zinc finger protein 780B
CRIPT	cysteine-rich PDZ-binding protein
SNX1	sorting nexin 1
FAM84A	family with sequence similarity 84, member A
MITF	microphthalmia-associated transcription factor
PLA2R1	phospholipase A2 receptor 1, 180kDa
FECH	ferrochelatase
GPR26	G protein-coupled receptor 26
PABPC1L2A	poly(A) binding protein, cytoplasmic 1-like 2A
ZFP91	ZFP91 zinc finger protein
NR3C1	nuclear receptor subfamily 3, group C, member 1 (glucocorticoid receptor)
SLC44A5	solute carrier family 44, member 5
AC140061.12	Uncharacterized protein
PURG	purine-rich element binding protein G
LEMD3	LEM domain containing 3
TICAM2	toll-like receptor adaptor molecule 2
RGS5	regulator of G-protein signaling 5
ABCA9	ATP-binding cassette, sub-family A (ABC1), member 9
C3orf38	chromosome 3 open reading frame 38
DDX18	DEAD (Asp-Glu-Ala-Asp) box polypeptide 18
SLC25A32	solute carrier family 25 (mitochondrial folate carrier), member 32
TCTA	T-cell leukemia translocation altered
ZNF484	zinc finger protein 484
HNRNPK	heterogeneous nuclear ribonucleoprotein K
STRIP2	striatin interacting protein 2
UCHL5	ubiquitin carboxyl-terminal hydrolase L5
KRR1	KRR1, small subunit (SSU) processome component, homolog (yeast)
RAP1GDS1	RAP1, GTP-GDP dissociation stimulator 1
TEX261	testis expressed 261
EIF5A2	eukaryotic translation initiation factor 5A2
TRIM22	tripartite motif containing 22
RBBP4	retinoblastoma binding protein 4
IMPACT	impact RWD domain protein
BTN2A2	butyrophilin, subfamily 2, member A2
CD2AP	CD2-associated protein
HMSD	histocompatibility (minor) serpin domain containing
KATNAL1	katanin p60 subunit A-like 1
MRPL18	mitochondrial ribosomal protein L18
RWDD1	RWD domain containing 1
LPPR5	Lipid phosphate phosphatase-related protein type 5
VCPIP1	valosin containing protein (p97)/p47 complex interacting protein 1
PPP1R3E	protein phosphatase 1, regulatory subunit 3E
HDAC4	histone deacetylase 4
KCNQ3	potassium voltage-gated channel, KQT-like subfamily, member 3
CNR2	cannabinoid receptor 2 (macrophage)
C4orf50	chromosome 4 open reading frame 50
GPR155	G protein-coupled receptor 155
TRIM71	tripartite motif containing 71, E3 ubiquitin protein ligase
PCLO	piccolo presynaptic cytomatrix protein
GABRA4	gamma-aminobutyric acid (GABA) A receptor, alpha 4
PAK3	p21 protein (Cdc42/Rac)-activated kinase 3
ZNF2	zinc finger protein 2
XKR4	XK, Kell blood group complex subunit-related family, member 4
NCOA2	nuclear receptor coactivator 2
SEPT3	septin 3
FER	fer (fps/fes related) tyrosine kinase
PRKX	protein kinase, X-linked
TMEM132B	transmembrane protein 132B
SP6	Sp6 transcription factor
TLCD2	TLC domain containing 2
INO80D	INO80 complex subunit D
GOSR1	golgi SNAP receptor complex member 1
KL	klotho
CLOCK	clock circadian regulator
ZNF783	zinc finger family member 783
SLC9A7	solute carrier family 9, subfamily A (NHE7, cation proton antiporter 7), member 7
ZNF254	zinc finger protein 254
FAM63B	family with sequence similarity 63, member B
CCDC68	coiled-coil domain containing 68
BRWD3	bromodomain and WD repeat domain containing 3
METTL16	methyltransferase like 16
MDGA1	MAM domain containing glycosylphosphatidylinositol anchor 1
[truncated: 1,815 more rows]

## Sheet: (E) mml-miR-146b-5p
mml-miR-146b-5p Predicted Target Genes	Full Gene Name	mRNAs Evaluated
PRRC1	proline-rich coiled-coil 1	AIMP1
TRAF6	TNF receptor-associated factor 6, E3 ubiquitin protein ligase	BMP2
NOVA1	neuro-oncological ventral antigen 1	CCL1
CD80	CD80 molecule	CCL11
NRAS	neuroblastoma RAS viral (v-ras) oncogene homolog	CCL13
ARHGAP29	Rho GTPase activating protein 29	CCL17
DUSP16	dual specificity phosphatase 16	CCL2
LCOR	ligand dependent nuclear receptor corepressor	CCL20
C16orf72	chromosome 16 open reading frame 72	CCL23
TMPRSS12	transmembrane (C-terminal) protease, serine 12	CCL5
GDNF	glial cell derived neurotrophic factor	CCR1
SIAH2	siah E3 ubiquitin protein ligase 2	CCR3
BAG1	BCL2-associated athanogene	CCR4
PRKAA2	protein kinase, AMP-activated, alpha 2 catalytic subunit	CCR6
MMP16	matrix metallopeptidase 16 (membrane-inserted)	CCR8
POU3F2	POU class 3 homeobox 2	CD40LG
ZNRF3	zinc and ring finger 3	CD70
FBXO28	F-box protein 28	CSF1
RCAN1	regulator of calcineurin 1	CSF2
CDS1	CDP-diacylglycerol synthase (phosphatidate cytidylyltransferase) 1	CX3CL1
RPA3	replication protein A3, 14kDa	CX3CR1
PRX	periaxin	CXCL11
LRP2	low density lipoprotein receptor-related protein 2	CXCL12
GPR75	G protein-coupled receptor 75	CXCL13
ROBO1	roundabout, axon guidance receptor, homolog 1 (Drosophila)	CXCL6
TM9SF2	transmembrane 9 superfamily member 2	CXCL9
VPS52	vacuolar protein sorting 52 homolog (S. cerevisiae)	CXCR1
SAMD8	sterile alpha motif domain containing 8	CXCR4
GPX8	glutathione peroxidase 8 (putative)	FASLG
FZD1	frizzled family receptor 1	IFNA2
KPNA6	karyopherin alpha 6 (importin alpha 7)	IFNG
SART3	squamous cell carcinoma antigen recognized by T cells 3	IL10RA
PHOX2B	paired-like homeobox 2b	IL10RB
SYT13	synaptotagmin XIII	IL11RA
SRSF12	serine/arginine-rich splicing factor 12	IL12B
CRNKL1	crooked neck pre-mRNA splicing factor 1	IL12RB1
TTL	tubulin tyrosine ligase	IL12RB2
NSD1	nuclear receptor binding SET domain protein 1	IL13
SETD9	SET domain containing 9	IL15
USP47	ubiquitin specific peptidase 47	IL15RA
TMEM136	transmembrane protein 136	IL16
GINM1	glycoprotein integral membrane 1	IL17A
ATG7	autophagy related 7	IL17F
KCNK10	potassium channel, subfamily K, member 10	IL1A
		IL1B
		IL1R1
		IL1R2
		IL1RN
		IL2
		IL20
		IL21
		IL2RA
		IL2RB
		IL2RG
		IL3
		IL4
		IL5
		IL5RA
		IL6
		IL6R
		IL7
		CXCL8
		CXCR2
		IL9R
		IL13RA2
		LOC710618
		IL9
		CCL7
		CCL26
		LTA
		MIF
		NAMPT
		OSM
		PF4
		SPP1
		TNF
		TNFRSF11B
		TNFSF10
		TNFSF11
		TNFSF13B
		TNFSF14
		TNFSF4
		VEGFA
		XCL1
		NFKBIA
		CD36
		STAT1
		MAFB
