# Supplementary material for: Effects of Cardiac Sympathetic Neurodegeneration and PPARγ Activation on Rhesus Macaque Whole Blood miRNA and mRNA Expression Profiles
Source: Biomed Res Int. 2020 May 2;2020:9426204. doi: 10.1155/2020/9426204 (PMC7212295; doi:10.1155/2020/9426204)
Supplement: Supplementary 12 — Supplementary Table 11: results of gene ontology (GO) enrichment analysis. [file 9426204.f6.xlsx]

## Sheet: Sample and Table Info
RNA Sample	Animal	Timepoint	Group
1	Pioglitazone 2	1wk	4
2	Placebo 1	Baseline	1
3	Placebo 1	12wk	5
4	Pioglitazone 2	Baseline	2
5	Pioglitazone 2	12wk	6
6	Placebo 1	1wk	3
7	Pioglitazone 5	Baseline	2
8	Placebo 5	1wk	3
9	Pioglitazone 5	12wk	6
10	Placebo 5	Baseline	1
11	Placebo 5	12wk	5
12	Pioglitazone 5	1wk	4
13	Pioglitzone 4	Baseline	2
14	Placebo 2	1wk	3
15	Placebo 2	12wk	5
16	Pioglitazone 4	1wk	4
17	Pioglitazone 4	12wk	6
18	Placebo 2	Baseline	1
19	Pioglitazone 4	Baseline	2
20	Placebo 3	Baseline	1
21	Pioglitazone 4	12wk	6
14	Placebo 3	1wk	3
23	Pioglitazone 4	1wk	4
24	Placebo 3	12wk	5
25	Placebo 4	1wk	3
26	Placebo 4	12wk	5
27	Pioglitzone 1	Baseline	2
28	Pioglitazone 1	1wk	4
29	Pioglitazone 1	12wk	6
30	Placebo 4	Baseline	1

## Sheet: A. DE_miRNA_Grp2_Grp1
DE_miRNA_Group2_vs_Group1_1
names	logFC	logCPM	PValue	FDR	Group2	Group1	Group1:2	Group2:4	Group2:7	Group1:10	Group2:13	Group1:18	Group2:19	Group1:20	Group2:27	Group1:30
mml-miR-204-5p	-1.51826	4.14112	0.00248395	0.267746	9.03	25.83	41.78	11.17	5.15	13.04	6.17	50.98	5.96	7.45	16.67	15.91
mml-miR-221-3p	0.997275	11.5607	0.00311819	0.267746	4024.84	2016.22	2464.51	3948.22	6852.24	1884.36	2405.1	2167.24	3681.14	2017.8	3237.5	1547.18
mml-miR-584-3p	-1.09453	4.82995	0.00551142	0.267746	17.99	38.47	17.87	9.54	15.26	60.16	20.18	40.05	18.63	22.58	26.35	51.7
mml-miR-101-3p	1.17099	9.59587	0.00614924	0.267746	1071.39	475.81	618.16	1632.47	1803.22	551.72	817.33	436.7	663.54	582.06	440.4	190.4
mml-miR-301a-3p	1.16084	3.63683	0.00632679	0.267746	16.87	7.54	7.9	20.02	29.61	11.85	15.67	5.34	12.17	9.37	6.88	3.25
mml-miR-138-5p	1.06985	2.88862	0.00672165	0.267746	9.69	4.61	7.9	6.67	16.88	3.86	6.41	4.37	10.81	4.4	7.7	2.53
mml-let-7b-5p	0.780612	12.6099	0.0116381	0.354688	7901.93	4599.87	3325.57	10032.5	8692.35	5646.43	6321.4	3680.52	7775.22	5537.16	6688.15	4809.66
mml-miR-340-5p	0.99727	7.46613	0.0118724	0.354688	235.28	117.86	156.81	313.58	159.46	141.09	163.23	99.04	441.37	99.34	98.76	93.03
mml-miR-29c-3p	0.926912	9.18253	0.0145787	0.387147	761.26	400.39	444.13	1034.05	1193.69	336.09	714.17	306.1	447.33	642.8	417.08	272.83
mml-miR-378a	0.773967	6.94113	0.0220023	0.525856	154.76	90.51	95.51	130.23	256.46	78.66	77.99	94.43	154.53	99.34	154.61	84.6
mml-miR-196b-5p	0.962591	3.76216	0.0300303	0.53576	17.63	9.03	13.6	17.3	37.59	9.72	10.68	4.98	8.68	12.53	13.88	4.34
mml-miR-181a-5p	0.784009	7.07921	0.035166	0.53576	170.77	99.19	85.54	132.54	209.47	126.18	68.5	95.88	231.11	58.93	212.21	129.42
mml-miR-4766-3p	-0.783313	4.52371	0.0360588	0.53576	16.74	28.82	21.82	12.12	7.58	22.23	27.3	37.75	18.98	22.92	17.72	39.41
mml-miR-190a-5p	1.5428	5.80241	0.0372594	0.53576	82.71	28.38	63.49	139.63	14.05	5.19	8.78	46.49	210.18	9.6	40.93	17.11
mml-miR-103-3p	0.727104	12.6592	0.0377361	0.53576	8064.52	4871.9	6647.84	7239.86	14098.2	4706.98	5352.35	3671.66	7227.66	5958.58	6404.58	3374.43
mml-miR-142-3p	-0.666744	13.7466	0.0385689	0.53576	10623.7	16864.9	15012.1	9865.65	7716.92	14571.8	13398.6	25530.3	10451.1	11207.9	11686.1	18002.6
mml-miR-107-3p	0.688432	8.03831	0.0397026	0.53576	324.15	201.14	258.91	306.63	532.53	189.14	210.48	184.61	337.9	220.25	233.2	152.8
mml-miR-20a-5p	0.888827	6.86771	0.0422688	0.53576	151.38	81.73	103.19	200.11	289.81	65.09	102.09	74.52	65.18	131.63	99.69	34.22
mml-miR-144	0.811983	6.77595	0.0425918	0.53576	139.37	79.37	75.56	264	140.05	100.76	84.88	118.22	138.53	58.59	69.38	43.74
mml-miR-378d	0.656994	4.29812	0.0553338	0.575285	23.79	15.09	14.58	28.33	34.96	15.71	10.68	13.47	23.74	16.48	21.22	15.18
mml-miR-16-1-3p	0.794149	2.66036	0.0591425	0.575285	7.74	4.44	6.25	11.44	10.91	2.13	7.48	5.95	6.3	4.63	2.57	3.25
mml-miR-151-3p	-0.601222	10.2955	0.0594905	0.575285	998.46	1514.67	1265.15	731.91	740.59	2023.19	1376.46	1518.98	883.93	1483.83	1259.39	1282.19
mml-miR-15a-5p	0.818747	11.0675	0.0596422	0.575285	2739.02	1552.82	2097.92	3595.82	5043.87	1534.3	2104.88	852.65	1297.13	2530.66	1653.38	748.59
mml-miR-432-5p	0.695104	5.26259	0.0597658	0.575285	47.18	29.13	36.41	55.99	54.26	34.47	39.17	11.41	51.82	43.35	34.63	20
mml-miR-106b-5p	0.77361	6.33842	0.0601763	0.575285	101.83	59.55	75.45	111.97	184.62	51.91	101.38	40.54	40.76	95.73	70.43	34.1
mml-miR-21-5p	0.575277	9.03563	0.0698471	0.609113	627.8	421.34	526.59	773.46	844.47	352.33	423.92	413.52	649.5	437.68	447.63	376.58
mml-miR-18b	0.652923	4.59097	0.0715217	0.609113	29.19	18.55	22.59	31.19	46.58	16.9	31.81	18.81	20.59	23.71	15.74	10.73
mml-miR-26b-3p	-0.629232	6.14684	0.0768532	0.609113	55.48	85.81	86.96	38.96	32.94	110.21	78.82	76.34	39.23	61.53	87.45	94
mml-miR-382-5p	0.806364	5.73866	0.0769033	0.609113	67.64	38.66	72.49	78.46	107.21	33.68	44.87	12.62	67.31	58.14	40.34	16.39
mml-miR-186-5p	-0.551454	11.5717	0.0805066	0.609113	2468.91	3618.33	3128.95	2204.05	1635.68	2822.22	3201.77	4403.9	2352.95	3185.54	2950.09	4551.05
mml-miR-183-5p	0.797846	2.9571	0.0808135	0.609113	9.53	5.49	5.37	3.68	20.72	6.52	4.99	3.28	8.85	9.14	9.44	3.13
mml-miR-331-5p	0.538637	5.40041	0.0826751	0.609113	49.78	34.25	28.84	61.98	56.79	34.34	41.43	33.62	33.19	32.4	55.5	42.06
mml-miR-133d-3p	-1.03398	4.90896	0.0863879	0.609113	19.58	40.11	14.58	17.44	31.22	74.01	18.76	94.19	6.47	9.71	24.02	8.07
mml-miR-29b-2-5p	0.612672	4.30883	0.0897641	0.609113	23.69	15.48	15.57	23.57	36.68	16.37	19.71	9.35	16	25.51	22.5	10.6
mml-miR-340-3p	-0.541038	6.86029	0.0907904	0.609113	94.48	137.46	116.35	115.24	52.04	147.35	125.83	161.18	93.6	138.4	85.7	124
mml-miR-199a-3p	0.779163	5.11295	0.0934952	0.609113	43.39	25.3	25.22	24.11	48.2	41.26	21.49	22.09	78.28	32.51	44.89	5.42
mml-miR-18a-5p	0.563198	3.68268	0.0942979	0.609113	15.06	10.17	10.75	20.57	16.47	9.58	15.43	12.99	13.02	11.4	9.79	6.15
mml-miR-337-5p	0.760158	2.54158	0.111413	0.647354	7.03	4.13	9.43	6.81	11.82	2.53	7.36	1.34	5.53	5.31	3.61	2.05
mml-miR-181b-5p	0.538948	5.61631	0.113599	0.647354	57.82	39.81	31.8	43.05	91.85	39.4	30.03	47.58	59.9	40.98	64.25	39.29
mml-miR-26a-2-3p	-0.585243	3.77373	0.114081	0.647354	10.79	16.15	13.82	16.89	5.25	15.97	11.16	25.73	8.51	13.77	12.13	11.45
mml-let-7a-3p	-0.60506	6.66369	0.122808	0.647354	80.25	122.08	103.74	73.15	29.41	107.95	127.73	187.52	99.39	68.86	71.59	142.32
mml-miR-19a-3p	0.540141	7.26521	0.125759	0.647354	182.03	125.18	123.7	269.04	195.83	134.3	154.68	167.37	200.48	130.61	90.13	69.89
mml-miR-335-3p	-0.65012	4.34751	0.127824	0.647354	15.67	24.6	15.9	14.44	9.4	10.38	16.26	33.01	17.27	13.1	20.99	50.61
mml-miR-155	0.571827	7.97722	0.127854	0.647354	301.01	202.5	239.28	334.42	392.98	291.5	173.32	100.74	249.06	268.45	355.28	112.55
mml-miR-146a-5p	0.491788	7.87522	0.134878	0.647354	274.14	194.96	224.26	273.39	424.1	253.03	214.16	139.94	273.31	197.67	185.74	159.91
mml-miR-133c-3p	-0.943717	3.8569	0.142801	0.647354	9.77	18.81	6.14	8.04	14.15	27.15	9.85	54.13	3.4	3.95	13.41	2.65
mml-miR-10a-5p	-0.445323	5.90089	0.14937	0.647354	50.4	68.64	85.75	38.41	36.18	70.28	54.96	62.99	58.8	61.41	63.66	62.78
mml-miR-106a-5p	0.635389	6.03056	0.150291	0.647354	79.26	51.01	60.2	91.95	143.19	56.44	78.59	25.73	39.23	90.76	43.38	21.93
mml-miR-370-3p	0.592935	4.98579	0.151265	0.647354	37.83	25.07	46.17	47.27	50.52	30.75	26.12	9.1	38.89	26.08	26.35	13.26
mml-miR-7	0.564503	10.9355	0.152085	0.647354	2336.46	1579.87	1955.58	3145.88	3336.64	1675.65	1625.28	735.64	2308.44	2558.43	1266.04	974.06
mml-miR-20b-5p	0.622049	4.64526	0.154009	0.647354	30.06	19.52	30.27	34.46	42.95	22.23	31.34	8.25	21.87	30.82	19.71	6.03
mml-miR-424-5p	0.608443	6.16752	0.154826	0.647354	86.56	56.76	47.7	142.62	119.64	40.6	86.78	57.65	65.44	77.33	18.31	60.49
mml-miR-493-5p	0.716104	2.65231	0.155679	0.647354	7.53	4.57	9.43	6.67	14.45	5.19	3.56	0.97	4.08	4.97	8.86	2.29
mml-miR-140-5p	0.484563	6.32174	0.155897	0.647354	93.05	66.48	84.99	114.15	130.66	51.11	106.96	78.29	60.76	61.98	52.7	56.04
mml-let-7f-5p	0.630757	12.8617	0.163294	0.647354	9044.33	5841.15	6150.64	11740.5	16186.4	7183.39	6768.47	2136.77	4430.19	10801.5	6096.18	2933.49
mml-miR-363-3p	0.484578	4.49161	0.165167	0.647354	25.98	18.56	26.32	24.79	15.26	23.83	24.45	14.56	27.48	16.03	37.89	12.05
mml-let-7i-5p	0.595298	13.3428	0.165658	0.647354	12502.4	8275.4	11041.4	15935.5	19193.7	9726.89	10659.4	3306.69	6418.01	13713.8	10305.3	3588.21
mml-miR-190b	0.634501	4.84526	0.165727	0.647354	34.74	22.34	26.43	79.96	28.8	23.29	30.39	13.59	16.93	38.16	17.61	10.24
mml-miR-30c-5p	-0.412018	13.4003	0.16777	0.647354	9277.8	12344.5	10805.8	9331.94	6435.52	11504.8	12340.8	13294.8	8657.11	13298	9623.66	12819.1
mml-miR-28-3p	-0.422227	7.64136	0.169181	0.647354	170.45	228.41	227.55	129.41	129.85	255.69	189.94	178.18	181.5	206.14	221.54	274.51
mml-miR-23a-3p	-0.431282	11.2713	0.173243	0.647354	2104.73	2838.1	3566.05	1476.36	1698.33	2941.61	2033.77	2284.85	2281.38	2230.83	3033.8	3167.16
mml-miR-942-5p	-0.459425	11.1722	0.174568	0.647354	1943.09	2671.72	1674.3	1740.63	1466.12	2653.17	2240.92	3318.46	1368.86	2112.07	2898.9	3600.62
mml-miR-17-5p	0.556927	8.37549	0.174613	0.647354	395.16	268.59	338.3	462.06	673.39	280.32	383.68	152.32	218.09	443.55	238.56	128.46
mml-miR-98	0.568901	6.26388	0.177414	0.647354	91.53	61.69	66.34	99.99	157.03	77.33	71.23	25.25	53.86	108.94	75.56	30.61
mml-miR-34a-5p	0.564647	6.57761	0.178038	0.647354	113.69	76.86	118.32	87.59	204.02	87.32	71.58	23.67	70.46	80.04	134.79	74.96
mml-miR-128a-3p	-0.41039	11.9842	0.181696	0.647354	3478.75	4623.4	4585.68	3239.6	2179.33	4436.78	4956.81	4492.5	3337.2	4414.01	3680.82	5188.05
mml-miR-148a-3p	0.444252	9.61928	0.184874	0.647354	906.35	666.14	853.27	1010.08	813.45	559.84	616.59	443.01	1419.32	774.43	672.31	700.14
mml-miR-30b-5p	-0.412649	10.4414	0.185067	0.647354	1192.86	1587.82	1495.44	1207.87	834.46	1293.51	1760.49	1909.93	1054.45	1794.5	1107	1445.72
mml-miR-93-3p	-0.458021	10.6205	0.188277	0.647354	1326.28	1821.87	1447.08	990.05	1012.01	1610.7	1638.58	3255.35	1378.9	1102.15	1611.87	1694.08
mml-miR-128b-3p	-0.409546	11.7692	0.189776	0.647354	2998.24	3982.45	3817.39	2844.7	1810.8	3629.63	4344.97	3978.97	2722.92	3887.72	3267.82	4598.53
mml-miR-365-3p	-0.427289	3.57957	0.193741	0.647354	9.99	13.46	14.37	7.9	8.99	12.91	13.53	9.59	12.42	15.24	7.11	15.18
mml-miR-1271-5p	-0.500568	7.05952	0.196639	0.647354	110.29	156.04	178.86	79.55	158.65	113.27	171.42	272.6	69.43	110.63	72.41	104.84
mml-let-7g-5p	0.603713	12.3088	0.197786	0.647354	6119.6	4027.04	4370.85	8908.43	10402.5	4344.4	4742.53	1593.75	2695.61	8106.43	3848.95	1719.75
mml-miR-491-3p	-0.461053	3.7761	0.200436	0.647354	11.35	15.61	13.05	12.4	5.56	12.91	18.4	21.73	12	16.03	8.4	14.34
mml-miR-126	0.64966	9.94666	0.206041	0.650475	1205.07	768.13	1171.28	1950.82	1994.31	780.39	663.84	275.15	848.11	1421.63	568.31	192.21
mml-miR-324-5p	-0.385427	7.73789	0.212092	0.650475	184.94	241.56	159.89	184.17	137.73	210.97	220.92	288.02	171.63	272.74	210.23	276.2
mml-miR-30e-3p	-0.371541	8.35544	0.212216	0.650475	285.4	369.21	337.32	327.47	250.6	329.17	365.28	423.83	246	328.29	237.63	427.44
mml-miR-15b-3p	-0.39798	11.3227	0.216427	0.650475	2210.18	2912.25	3262.84	2367.79	1257.76	2602.86	3008.15	3382.06	2235.26	2032.59	2181.93	3280.91
mml-miR-16-5p	0.551152	16.9814	0.216783	0.650475	153809	104971	135059	215101	266577	110854	115918	42096.4	76204.4	184355	95245.4	52491.1
mml-miR-26b-5p	0.530669	10.9254	0.217732	0.650475	2298.28	1590.94	1686.03	2641.46	4374.52	2321.74	1787.2	673.13	1245.4	2400.95	1442.8	872.83
mml-miR-339-5p	-0.411369	14.3162	0.224993	0.655673	17509.5	23286.7	18403.2	19414.3	10662.6	18634.2	24934	36469.7	19149.1	19479	13387.5	23447.3
mml-miR-29c-5p	-0.414207	6.00876	0.230273	0.655673	55.02	73.32	59.33	32.69	39.51	58.57	81.91	103.65	50.88	59.61	70.08	85.44
mml-miR-3122	0.379226	3.81226	0.235252	0.655673	15.62	12.01	10.09	13.89	22.94	13.71	15.55	11.65	12.42	13.77	13.29	10.85
mml-miR-454-3p	0.51126	8.81617	0.235388	0.655673	529.53	371.51	428.99	694.59	924.8	402.11	417.51	185.34	292.54	668.65	318.2	172.45
mml-miR-93-5p	0.532701	15.3897	0.236008	0.655673	50768.2	35094	48942.6	60489.6	87424.7	34152.7	46338.2	13618.7	27602	64007.8	31986.5	14748.2
mml-miR-582-3p	-0.777491	2.54081	0.238289	0.655673	4.13	7.08	13.27	1.91	1.01	8.52	4.63	0.73	1.11	4.06	12.01	8.8
mml-let-7d	0.437851	11.5797	0.239187	0.655673	3521.58	2599.74	2337.74	3235.51	5000.42	3257.87	2564.89	1207.9	2486.37	4289.38	4320.71	1905.81
mml-let-7c-5p	0.442566	7.19918	0.241419	0.655673	169.05	124.38	100.78	162.78	246.86	138.83	132.96	61.54	149.76	239.55	152.86	81.22
mml-miR-7204-3p	-0.36271	6.04136	0.250294	0.672139	57.42	73.85	63.38	48.63	40.72	78.66	64.58	100.38	62.88	52.49	70.31	74.35
mml-miR-424-3p	0.392511	4.96318	0.256839	0.682051	35.14	26.78	17.11	38.41	48.2	25.42	32.65	21.24	37.1	30.59	19.36	39.53
mml-miR-7186-3p	-0.411739	6.13102	0.263048	0.690863	59.96	79.76	75.89	68.93	41.53	50.45	94.97	110.57	66.29	95.84	28.1	66.04
mml-miR-221-5p	0.384385	3.06553	0.266255	0.691684	9.2	7.07	7.46	8.31	14.25	8.39	5.1	6.07	9.62	6.55	8.74	6.87
mml-miR-500b-5p	-0.354453	3.45112	0.269903	0.693622	9.38	12.03	10.86	6.81	10.31	11.31	8.43	15.17	12.59	10.05	8.74	12.77
mml-miR-330-5p	-0.392702	3.26253	0.289663	0.726457	8.11	10.64	7.46	6.27	4.85	8.65	11.99	14.44	6.04	8.81	11.43	13.86
mml-miR-187-3p	0.389058	9.68102	0.294915	0.726457	930.64	710.65	1137.07	1017.43	640.15	676.84	1093.45	255.37	1044.58	894.43	857.59	589.52
mml-miR-636	-0.394789	4.41031	0.295068	0.726457	18.18	23.91	12.72	13.21	13.54	26.22	18.16	30.22	16.59	13.77	29.38	36.63
mml-miR-339-3p	-0.329965	9.4913	0.303743	0.726457	637.58	801.42	748.65	792.94	464.72	541.47	657.9	1132.29	777.48	710.42	494.85	874.28
mml-let-7a-5p	0.425372	14.9316	0.305945	0.726457	35823.8	26676.1	25759.2	41268.1	58061.7	32278.9	29167.8	10935.8	20909	49810.2	29712.6	14596.4
mml-miR-374a-5p	0.36694	6.36659	0.309598	0.726457	92.71	71.87	97.82	129.27	126.61	72.68	59.36	65.3	63.31	88.84	85	34.71
mml-let-7e-5p	0.391297	5.00357	0.313697	0.726457	36.14	27.55	27.63	37.05	53.45	34.21	27.42	11.41	27.23	47.75	35.56	16.75
mml-miR-431	0.401003	4.43945	0.315496	0.726457	24.42	18.48	42.44	20.02	30.11	13.98	20.66	10.32	29.95	12.19	21.34	13.5
mml-let-7b-3p	-0.46185	5.78794	0.319942	0.726457	46.29	63.77	43.21	28.74	9.7	65.22	78.47	89.45	62.88	30.48	51.65	90.5
mml-miR-222-3p	0.320475	7.85483	0.32039	0.726457	256.86	205.68	177.1	303.64	355.9	157.6	180.2	271.88	178.35	220.81	266.2	201.01
mml-miR-576-5p	-0.371384	5.68722	0.321257	0.726457	44.74	57.88	37.28	38.82	20.92	66.69	48.55	95.52	50.2	37.25	65.18	52.66
mml-miR-151-5p	-0.29365	6.45335	0.325612	0.726457	78.53	96.28	88.61	64.57	76.19	127.78	88.2	87.87	77.77	101.94	85.93	75.2
mml-miR-331-3p	-0.342755	11.587	0.333868	0.726457	2712.47	3439.89	2507.83	2211.95	1612.44	4524.89	3916.77	4225.12	1953.36	2260.85	3867.84	3680.76
mml-miR-130b-5p	-0.317094	5.91741	0.335024	0.726457	53.63	66.81	46.83	49.31	35.87	70.41	61.14	81.81	45.35	51.03	76.49	83.99
mml-miR-7205-3p	0.435381	5.62618	0.336869	0.726457	56.54	41.8	40.46	33.65	29.91	53.37	52.95	62.87	39.31	39.29	126.86	13.01
mml-miR-32-5p	0.379927	3.97368	0.338703	0.726457	17.54	13.45	12.94	36.37	16.27	8.52	9.14	20.15	14.38	14.68	11.54	10.97
mml-miR-6529-3p	-0.330894	4.87003	0.340622	0.726457	25.71	32.34	23.25	19.34	15.76	33.94	41.67	44.3	21.36	27.55	30.43	32.66
mml-miR-660-5p	0.282797	5.57352	0.342222	0.726457	52.03	42.76	45.62	62.39	54.87	39	53.3	40.78	53.78	43.91	35.8	44.47
mml-miR-185-3p	0.388309	4.15869	0.343031	0.726457	19.99	15.28	10.64	11.17	22.33	22.63	13.65	12.02	15.23	8.35	37.55	22.78
mml-miR-361-5p	-0.277603	11.415	0.347126	0.726457	2468.53	2992.33	2761.36	1698.54	2507.33	3339.06	2439.88	2688.41	2800.1	2868.66	2896.8	3304.17
mml-miR-185-5p	0.288984	11.6739	0.349863	0.726457	3593.14	2940.93	2107.79	2903.82	4293.78	3729.46	3382.33	2319.2	3341.54	2763.44	4044.26	3784.75
mml-miR-106b-3p	0.283255	11.4403	0.350888	0.726457	3050.66	2506.85	2062.5	2479.63	3414.85	2916.99	2485.11	2588.77	2710.07	2135.89	4163.65	2830.1
mml-miR-125b-5p	-0.39231	9.24471	0.355178	0.726457	524.45	688.36	346.64	600.32	405.31	521.24	313.87	622.52	928.94	1496.02	373.82	455.39
mml-miR-654-3p	-0.373122	7.92256	0.356163	0.726457	211.22	273.55	617.72	163.74	158.95	152.27	283.25	203.42	248.89	247.79	201.25	146.54
mml-miR-30d-5p	-0.268145	13.1011	0.360612	0.726457	7972.23	9600.61	10267.1	7898.89	5524.96	9675.24	8799.86	9270.23	7958.25	8737.49	9679.16	10053
mml-miR-22	0.313088	10.4237	0.363024	0.726457	1521.75	1224.88	1764.22	1013.48	2359.6	1103.17	1233.18	1419.46	1138.86	992.19	1863.61	845.35
mml-miR-379-5p	0.506391	3.6072	0.367538	0.726457	14.03	9.86	24.02	16.35	27.18	6.92	10.57	2.79	8.59	13.89	7.46	1.69
mml-miR-425	-0.301247	14.2378	0.367788	0.726457	17309.6	21329.1	15475.1	15109.3	12988.9	16385	15316.1	33549.1	18077.2	16711.2	25056.7	24525
mml-miR-376c-3p	0.344666	2.9891	0.37084	0.726481	8.61	6.78	12.39	8.99	8.59	4.13	7.12	4.13	12.76	7.45	5.6	5.78
mml-miR-7180-5p	-0.373357	6.63602	0.37821	0.734896	86.46	112.01	67.33	37.19	54.77	87.58	82.15	160.58	89.35	67.06	168.84	177.51
mml-miR-99a-5p	-0.399308	4.97451	0.383624	0.739404	26.89	35.5	15.79	22.61	17.48	23.56	9.62	32.53	58.03	65.14	26.7	40.49
mml-miR-30c-1-3p	0.256536	5.01981	0.390407	0.743498	35.07	29.36	27.96	32.97	35.97	38.6	39.89	26.7	33.87	24.27	32.65	29.28
mml-miR-196a-5p	-0.384179	7.86331	0.394937	0.743498	201.83	263.42	393.79	191.93	378.93	374.29	125.24	160.7	167.29	325.8	145.75	62.54
mml-miR-500a-5p	-0.28081	3.73313	0.396068	0.743498	11.8	14.35	14.26	9.26	13.24	12.38	11.63	21.12	10.64	9.03	14.23	14.94
mml-miR-6790-3p	-0.274513	4.27454	0.398616	0.743498	17.31	20.95	14.15	12.8	13.34	19.7	24.81	24.52	17.53	21.67	18.07	24.7
mml-let-7f-3p	-0.33146	5.17264	0.401811	0.743498	31.74	39.95	36.63	21.25	11.82	37	53.66	55.71	37.7	22.8	34.28	47.6
mml-miR-6827-3p	-0.275611	4.14809	0.404413	0.743498	15.83	19.17	21.49	10.9	12.53	17.7	18.4	26.1	16	14.79	21.34	15.79
mml-miR-23b-3p	-0.245183	9.74617	0.414634	0.75647	785.78	931.36	1049.45	730.69	556.07	1042.08	722	875.71	1016.84	779.62	903.3	909.95
mml-miR-296-5p	-0.248987	10.2075	0.421706	0.759881	1080.38	1283.92	1238.62	1028.88	1107.4	1790.39	1050.84	1535.73	1092.06	796.55	1122.74	1058.29
mml-miR-1260b	-0.276124	5.49879	0.422863	0.759881	40.7	49.3	32.57	30.1	33.95	61.89	35.49	63.24	38.63	32.4	65.3	56.4
mml-miR-15b-5p	0.275217	13.5107	0.433244	0.772725	12781.4	10561.6	11673.8	14679.7	19405.5	15480.3	9536.59	5305.58	9538.91	11153	10746.3	9195.26
mml-miR-671-3p	-0.268659	7.82029	0.43793	0.774129	204.82	246.76	182.69	131.32	154.2	234.53	226.62	367.15	203.11	159.63	308.87	289.82
mml-miR-584-5p	0.263575	9.29567	0.442955	0.774129	685.43	571	566.73	477.45	1250.08	735.8	520.43	454.54	672.56	617.96	506.63	479.98
mml-miR-191-5p	-0.233893	16.5327	0.446113	0.774129	87135.9	102472	82438	107040	71360.8	145049	73921.7	80178.3	90023.9	109363	93333.6	95332.2
mml-miR-7186-5p	0.231484	5.66484	0.446987	0.774129	54.54	46.46	52.31	58.71	73.06	43.26	41.31	50.49	52.42	49.11	47.22	37.12
mml-miR-19b	-0.22612	12.2134	0.466866	0.778751	4377.52	5120.32	4159.54	5428.8	3459.82	5026.7	4806.16	6541.28	5233.03	5446.06	2959.76	4428.02
mml-miR-192-5p	-0.262041	8.98657	0.467753	0.778751	461.12	552.96	396.42	391.5	185.02	541.74	717.14	754.7	502.38	474.7	509.54	597.23
mml-miR-320b	0.274303	5.41634	0.468965	0.778751	46.49	38.46	19.52	36.23	47.29	44.19	29.2	32.77	52.33	26.64	67.39	69.17
mml-miR-486-5p	-0.24764	17.3024	0.469912	0.778751	147798	175476	117403	123585	91749.4	213369	179218	223177	123099	123301	221340	200128
mml-miR-140-3p	-0.209526	13.1594	0.472151	0.778751	8485.87	9812.26	9201.73	9433.83	5953.21	10434.7	9948.75	10413.1	8420.64	9433.91	8672.91	9577.87
mml-miR-134-5p	0.271614	5.02955	0.476278	0.778751	35.48	29.38	50.33	40.19	46.89	27.69	30.15	11.53	32.42	38.04	27.75	19.28
mml-miR-1306-5p	-0.249881	7.92512	0.479114	0.778751	221.86	263.82	163.39	213.59	141.06	446.83	237.19	202.81	187.71	226.01	329.74	280.06
mml-miR-27a-3p	-0.211772	6.39322	0.479725	0.778751	77.68	89.96	113.39	69.61	71.24	81.86	91.29	66.39	79.56	82.86	76.72	105.32
mml-miR-503-5p	0.306573	7.17487	0.480601	0.778751	159.54	128.99	91.35	184.17	282.43	110.34	181.99	77.92	104.92	218.56	44.19	146.78
mml-miR-138-3p	0.261626	3.10258	0.482239	0.778751	9.11	7.62	6.03	10.63	6.77	13.18	7.72	4.01	12.51	6.43	7.93	8.44
mml-miR-494-3p	-0.273778	5.39912	0.490007	0.785984	37.99	45.93	89.81	42.36	33.55	30.08	36.8	26.82	54.03	57.12	23.2	25.79
mml-miR-29a-3p	0.218557	7.66541	0.501203	0.787131	218.1	187.45	228.97	194.25	290.62	219.89	202.76	101.23	204.56	153.87	198.34	233.3
mml-miR-1180-3p	0.244475	8.82242	0.501469	0.787131	490.71	414.24	253.54	320.66	502.42	640.37	353.29	368.37	480.34	278.95	796.84	529.99
mml-miR-1249	-0.319466	6.82757	0.5015	0.787131	100.86	125.86	99.02	39.64	31.83	114.87	253.21	174.05	103.81	80.49	75.79	160.88
mml-miR-361-3p	-0.222692	11.8124	0.503896	0.787131	3319.25	3873.26	2273.15	3441.75	2315.94	4695.93	4756.3	4809.41	3511.8	4458.15	2570.44	3129.68
mml-miR-223	-0.206904	15.2256	0.518286	0.797353	35570.3	41055.5	48574.9	36952.3	23668	43044.3	38456.4	23540.1	35269.3	39389.4	43505.3	50729
mml-miR-187-5p	-0.317208	5.64372	0.520783	0.797353	44.32	55.22	91.79	61.16	10.61	68.95	57.81	13.23	65.09	41.88	26.93	60.25
mml-miR-26a-5p	0.209747	11.8605	0.523474	0.797353	3987.97	3448.34	3790.64	4586.55	5868.53	3391.37	2201.86	2878.6	2921.61	4053.1	4361.29	3127.99
mml-miR-423-3p	-0.236163	12.6332	0.526876	0.797353	5833.83	6871.43	4456.06	3369.96	4438.78	7448.67	5205.75	9014.74	5883.38	4010.43	10271.3	9427.24
mml-miR-532-5p	0.195373	7.04957	0.52712	0.797353	141.19	123.3	153.31	165.24	151.67	132.84	146.97	127.44	153.67	107.25	88.38	95.68
mml-miR-942-3p	-0.279862	2.73525	0.538305	0.80915	5.83	7.08	1.43	6.81	5.15	12.91	7.83	4.73	4.08	6.43	5.25	9.88
mml-miR-335-5p	-0.246944	4.17852	0.548189	0.818858	16.33	19.42	11.51	13.62	10.61	20.63	16.14	12.87	32.5	17.72	8.74	34.34
mml-miR-652	0.175157	8.12155	0.558924	0.828784	295.14	261.4	232.04	258.27	350.84	248.64	217.84	300.52	264.8	263.6	383.96	262.22
mml-miR-484	-0.226639	13.6021	0.56177	0.828784	11460.1	13409.6	8085.71	6662.56	8001.17	15633.4	10450.2	20394.2	12943.2	6514.9	19243.5	16419.6
mml-miR-1255a-3p	-0.196469	3.23986	0.573943	0.841549	8.61	9.84	8.66	10.9	6.16	5.99	9.62	12.62	7.06	12.76	9.33	9.16
mml-miR-324-3p	-0.180729	7.55182	0.582725	0.842214	175.68	199.15	130.39	119.74	137.83	272.2	204.78	225.15	177.16	157.14	238.91	210.89
mml-miR-92b-3p	-0.272276	7.7002	0.584901	0.842214	188.2	227.29	169.75	67.29	82.15	150.01	160.26	394.83	119.89	137.95	511.41	283.91
mml-miR-409-5p	0.227186	3.51046	0.584969	0.842214	12.03	10.27	23.58	11.17	10.51	5.32	11.04	6.31	18.21	9.26	9.21	6.87
mml-miR-491-5p	-0.16706	7.50902	0.596796	0.845789	171.39	192.46	164.93	115.65	153.19	209.37	162.64	233.04	219.54	132.76	205.91	222.21
mml-miR-299-5p	-0.19255	6.48557	0.598568	0.845789	83.42	95.32	187.41	69.47	61.03	68.02	86.3	87.51	107.81	79.7	92.46	53.99
mml-miR-381-3p	-0.20819	5.02951	0.598702	0.845789	30.09	34.75	75.89	23.02	30.92	17.17	38.23	29.74	32.16	30.48	26.12	20.49
mml-miR-18a-3p	-0.22077	9.2996	0.607476	0.845789	581.84	678.06	370.54	310.45	346.19	597.24	541.8	1102.31	542.54	338.56	1168.21	981.65
mml-miR-1226	-0.181322	8.06764	0.611819	0.845789	251.24	284.9	142.23	177.9	158.55	393.86	359.7	297.49	232.3	248.81	327.76	342.12
mml-miR-532-3p	-0.159366	9.62825	0.61413	0.845789	747.52	834.83	630	729.87	519.9	1179.17	984.36	862.11	641.59	715.84	861.9	787.03
mml-miR-16-2-3p	0.261502	6.97209	0.615624	0.845789	136.63	113.99	73.91	161.15	52.04	55.64	126.07	303.19	278.93	50.91	64.95	86.28
mml-miR-194-5p	0.146751	8.17563	0.615763	0.845789	303.61	274.23	267.24	269.17	294.96	255.69	361.71	300.4	230.26	284.26	361.93	263.55
mml-miR-487b-3p	0.194909	3.55865	0.63709	0.8676	12.33	10.76	23.47	14.44	10.61	6.92	10.45	5.7	17.27	11.18	8.86	6.51
mml-miR-664	-0.175857	3.20123	0.638902	0.8676	8.43	9.52	7.13	8.99	4.35	8.39	7.24	15.66	9.45	8.24	12.13	8.19
mml-miR-197-3p	-0.164962	11.7878	0.64557	0.869083	3333.67	3737.5	2329.41	2222.44	2376.37	4693	3388.39	4670.43	2740.62	2720.54	5940.52	4274.13
mml-miR-122a-5p	0.273653	5.84245	0.647267	0.869083	62.51	51.74	10.86	16.89	91.85	108.61	23.03	54.74	139.12	67.85	41.63	16.63
mml-miR-1296-5p	-0.197736	7.20667	0.652768	0.871573	137.39	157.6	144.64	40.59	104.99	281.38	169.76	126.83	135.38	67.62	236.23	167.5
mml-miR-29b-3p	-0.146829	8.09039	0.659754	0.873587	258.5	286.16	219.54	377.47	275.06	203.65	240.15	265.32	179.12	443.32	220.72	298.98
mml-miR-154-5p	-0.156787	5.4262	0.66243	0.873587	40.45	45.08	75.99	27.52	30.52	28.09	61.26	37.75	37.61	49.22	45.36	34.34
mml-miR-148a-5p	-0.184183	3.06949	0.665242	0.873587	7.64	8.69	10.53	3.68	5.46	5.59	4.39	10.8	8.34	5.31	16.32	11.21
mml-miR-329-3p	-0.199709	2.94631	0.670886	0.876185	6.96	7.98	17.98	8.17	2.73	5.72	8.67	2.67	9.19	8.35	6.06	5.18
mml-miR-181a-3p	-0.140971	3.92798	0.685903	0.890929	14.24	15.73	16.34	10.22	10.91	13.44	12.23	18.69	22.55	9.82	15.27	20.37
mml-miR-671-5p	0.135045	4.45221	0.693351	0.895734	22.66	20.65	15.35	17.57	23.34	14.91	20.66	34.59	29.44	22.13	22.27	16.27
mml-miR-3200-3p	-0.135569	7.63227	0.704452	0.905182	188.87	207.49	158.57	116.6	145.91	252.63	261.17	159.97	162.86	137.05	257.8	329.22
mml-miR-142-5p	0.129983	12.8396	0.710541	0.908124	7659.81	6999.86	4891.85	10832.8	4038.53	7398.89	6623.88	9954.9	10918.2	6666.17	5885.6	6087.51
mml-miR-374b-5p	0.131715	6.80646	0.721943	0.917789	116.81	106.6	159.12	137.17	197.55	103.56	76.57	91.27	66.63	118.31	106.11	60.74
mml-miR-150-5p	-0.109013	14.5111	0.733588	0.927658	22468	24231.6	23821.8	18092.6	22852.1	39715.2	21550	18659.2	23339.2	17456.3	26506.5	21505.5
mml-miR-7180-3p	0.109888	4.48386	0.742079	0.931469	22.98	21.31	15.9	13.62	21.83	23.43	25.52	15.9	24.42	25.29	29.5	26.03
mml-miR-451	-0.101492	15.3379	0.745973	0.931469	39958.3	42870.6	42743.2	41085.3	28189.8	33706.9	32197	52395.4	41639.7	35693.8	56679.9	49813.6
mml-miR-125a-5p	-0.104714	8.72685	0.749855	0.931469	408.08	438.83	372.19	444.35	247.37	526.96	294.05	508.55	631.97	394.44	422.67	392.01
mml-miR-200c-3p	-0.163606	3.80632	0.76124	0.931469	12.97	14.53	14.8	11.17	25.77	9.58	7.48	4.98	7.74	39.17	12.71	4.1
mml-miR-148b-3p	0.0930025	9.36998	0.762062	0.931469	682.75	640.14	490.29	561.23	604.37	603.1	701.47	505.03	869.8	735.59	676.86	866.68
mml-miR-210-3p	0.12848	9.2837	0.762157	0.931469	650.77	595.3	707.75	766.79	992.2	539.47	695.41	370.92	465.02	1142.79	334.41	215.59
mml-miR-320a	0.110855	11.5453	0.763883	0.931469	3103.15	2873.66	1558.72	2689.95	3282.88	3895.97	1873.15	2103.64	3489.08	2034.06	4180.68	4775.92
mml-miR-505-3p	-0.108673	6.14956	0.771854	0.933818	68.1	73.43	72.81	41.27	42.54	81.59	88.56	48.19	70.29	43.35	97.83	121.23
mml-miR-25	0.0853359	16.0315	0.773624	0.933818	68960.8	65000	60642	75699.5	77176.4	66307.4	77366.7	51017	49601	76112.8	64960.3	70920.8
mml-miR-421	-0.0818456	6.39488	0.784284	0.936656	81.54	86.3	71.5	93.31	84.98	88.38	73.72	66.88	85.86	105.1	69.84	99.66
mml-miR-130a-3p	0.121296	3.84913	0.787123	0.936656	14.79	13.58	11.95	20.98	25.26	13.31	8.78	5.34	10.04	27.66	8.86	9.64
mml-miR-485-3p	0.0914464	8.5058	0.787732	0.936656	374.78	351.76	479.44	386.59	223.02	388.4	445.88	276.25	492.85	410.92	325.55	203.78
mml-miR-337-3p	-0.110824	2.95365	0.79407	0.939519	7.24	7.79	15.57	6.67	5.56	4.26	10.09	6.07	6.98	8.35	6.88	4.7
mml-miR-362-5p	0.0789276	4.6033	0.814108	0.954064	24.72	23.43	20.95	16.35	22.94	19.43	27.9	32.29	31.23	16.14	25.19	28.32
mml-miR-502-3p	-0.0723549	4.71616	0.815859	0.954064	25.39	26.72	30.6	18.12	24.25	26.49	26.71	30.83	32.08	19.64	25.77	26.03
mml-miR-148b-5p	-0.076488	3.97581	0.823408	0.954064	15.11	15.91	15.24	17.44	19	11.98	13.77	14.44	9.96	22.69	15.39	15.18
mml-miR-6529-5p	-0.0737282	8.05678	0.831059	0.954064	259.24	272.86	146.62	193.43	172.69	326.77	244.43	248.94	328.62	256.83	357.03	385.14
mml-miR-543-3p	0.0836331	2.98957	0.831621	0.954064	7.92	7.48	12.39	5.72	6.27	5.99	7	4.37	11.74	7.9	8.86	6.75
mml-miR-500a-3p	0.0661706	4.75459	0.833147	0.954064	27.37	26.16	33.12	22.34	31.33	29.42	28.85	19.78	29.61	21.22	24.72	27.23
mml-miR-296-3p	-0.0806854	4.13407	0.837205	0.954064	16.83	17.83	19.19	7.49	14.15	30.08	18.99	10.32	19.74	10.27	23.79	19.28
mml-miR-199a	-0.0907262	3.84856	0.84207	0.954064	13.74	14.62	10.42	7.08	4.85	10.38	19.71	24.15	13.02	20.21	24.02	7.95
mml-miR-409-3p	0.0709881	9.67714	0.842291	0.954064	838.57	798.3	1398.5	953.41	686.53	734.6	876.09	471.78	1037.52	926.27	639.32	460.34
mml-miR-376a-3p	0.0692877	4.15938	0.851786	0.958542	18.05	17.2	26.21	20.02	13.44	11.58	18.88	12.14	26.97	22.35	10.96	13.74
mml-miR-130b-3p	0.0795761	5.0817	0.854265	0.958542	34.58	32.7	27.31	52.58	54.16	32.48	24.57	13.72	19.66	66.04	21.92	23.98
mml-miR-323a-3p	-0.0622707	5.14912	0.862185	0.962908	34.49	36.01	58.56	33.78	23.44	35.14	31.46	19.3	44.25	42.22	39.53	24.82
mml-miR-92a-3p	-0.0551652	16.8625	0.867976	0.964278	116878	121434	82822.7	103005	96607.6	141696	90678.5	134329	106024	90587.3	188077	157735
mml-miR-27b-3p	0.0496631	8.18871	0.872259	0.964278	296.57	286.53	337.86	372.02	361.76	323.04	268.41	194.56	252.38	281.44	228.3	295.72
mml-miR-30a-5p	0.0737769	6.7766	0.875516	0.964278	112.19	106.6	174.36	51.76	98.62	115.14	61.26	29.37	138.95	151.95	210.35	62.18
mml-miR-152-3p	0.06967	3.17676	0.880207	0.964998	9.04	8.59	5.7	16.07	7.17	5.72	3.09	6.31	10.81	18.97	8.05	6.27
mml-miR-338-3p	0.0534945	4.46821	0.888472	0.965903	22.32	21.5	26.1	17.57	26.98	20.1	20.3	8.86	12.93	23.26	33.81	29.16
mml-miR-342-3p	-0.0436127	9.86755	0.897438	0.965903	919.81	948.08	927.51	584.25	1139.63	1548.41	853.18	685.51	1215.44	714.71	806.52	864.27
mml-let-7i-3p	0.0408096	4.68109	0.898353	0.965903	25.82	25.06	22.48	38.69	20.01	25.82	26	30.46	19.32	24.5	25.07	22.05
mml-miR-423-5p	-0.041728	12.1025	0.902084	0.965903	4333.67	4460.87	2886.05	4046.44	3853.61	7237.96	3058.84	3181.79	4803.58	4044.63	5905.89	4953.91
mml-miR-628-3p	0.0460828	3.35629	0.903095	0.965903	10.16	9.85	10.86	8.31	15.16	11.05	5.58	6.92	10.89	13.21	10.84	7.23
mml-miR-30a-3p	-0.0447244	4.70576	0.905281	0.965903	25.45	26.26	37.72	17.84	31.63	26.09	16.5	11.89	27.82	35	33.46	20.61
mml-miR-30d-3p	0.0393603	3.33118	0.911509	0.968225	9.98	9.7	12.61	13.08	13.74	9.18	8.55	8.5	7.32	9.03	7.23	9.16
mml-miR-1240	-0.0374782	3.92194	0.921266	0.974259	14.74	15.14	7.68	10.9	9.2	22.63	17.45	15.78	15.15	14.79	20.99	14.82
mml-miR-1262-3p	-0.0513503	3.80104	0.930805	0.974592	13.48	13.96	7.57	11.99	3.64	13.98	6.65	3.52	10.04	15.35	35.1	29.4
mml-miR-99b-5p	-0.0269835	5.86882	0.93542	0.974592	57.65	58.75	64.37	57.08	36.68	53.24	38.82	54.98	93.86	63.33	61.8	57.84
mml-miR-369-5p	0.0305046	3.85261	0.937167	0.974592	14.37	14.05	28.4	14.58	17.08	7.72	13.06	8.74	14.3	16.82	12.83	8.56
mml-miR-503-3p	0.0276645	5.77269	0.937891	0.974592	54.97	53.92	40.79	61.3	76.49	45.52	60.54	41.39	49.44	79.7	27.05	62.18
mml-miR-30e-5p	0.0181918	10.4259	0.952753	0.985748	1384.12	1366.76	1447.63	1850.69	1221.18	1043.54	1418.96	1876.06	1316.96	1230.28	1112.83	1236.28
mml-miR-24-3p	0.0128663	9.69313	0.966668	0.995834	831.25	823.88	1060.2	614.08	1154.49	854.66	846.3	650.8	715.62	755.24	825.76	798.48
mml-miR-1304	0.0142955	5.55502	0.972183	0.997218	47.03	46.56	53.62	63.48	76.8	72.54	22.08	35.2	27.31	43.12	45.47	28.32
mml-miR-191-3p	0.0094212	6.43428	0.979467	1	86.52	85.98	103.63	51.63	77.91	127.91	114.32	61.78	96.75	52.95	92	83.63
mml-miR-627-5p	0.00704889	6.29104	0.9842	1	78.28	77.89	66.78	111.84	75.18	98.5	77.28	40.9	73.94	105.89	53.17	77.37
mml-miR-182	0.00483132	5.00528	0.993288	1	31.92	31.84	22.37	17.57	47.39	41.93	23.98	27.07	36.59	42.67	34.05	25.19
mml-miR-877-3p	0.00300052	3.61298	1	1	12.03	12	6.25	8.45	6.77	11.31	14.72	17.6	10.72	10.39	19.47	14.46
mml-miR-199a-5p	0.000894934	3.69449	1	1	12.73	12.72	9.1	9.13	4.95	11.45	16.38	21.12	12.08	16.37	21.1	5.54
mml-miR-323b-3p	-0.000262407	6.2334	1	1	75	75	135.32	87.86	46.38	66.95	67.9	45.51	101.85	87.83	71.01	39.41

## Sheet: B. DE_miRNA_Grp4_Grp3
DE_miRNA_Group4_vs_Group3_1
names	logFC	logCPM	PValue	FDR	Group4	Group3	Group4:1	Group3:6	Group3:8	Group4:12	Group3:14	Group4:16	Group3:14	Group4:23	Group3:25	Group4:28
mml-miR-155	0.994823	8.07162	0.00245558	0.343468	357.94	179.59	354.69	167.9	208.04	506	167.02	230.81	216.13	349.87	138.85	348.33
mml-miR-584-3p	-1.15975	4.80495	0.00289846	0.343468	17.15	38.32	14.25	25.36	31.71	22.59	53.05	16.81	16.89	15.6	64.61	16.5
mml-miR-204-5p	-1.31307	4.40256	0.00480945	0.365455	12.01	29.9	13.73	41.63	21.28	5.35	53.31	10.66	12.5	6.93	20.77	23.36
mml-miR-122a-5p	1.94099	6.18385	0.00616803	0.365455	115.01	29.95	400.16	42.85	41.61	99.24	9.62	34.75	17.11	27.29	38.55	13.62
mml-miR-7	1.07501	10.9884	0.00980665	0.371924	2754.96	1307.7	1889.15	2024.3	1123.28	3932.05	537.81	1550.59	2005.59	3418.98	847.52	2984.03
mml-miR-877-3p	-0.983931	3.78282	0.0126064	0.371924	9.09	17.98	7.77	9.97	13.15	6.53	16.84	13.17	14.91	7.34	35.02	10.64
mml-miR-16-2-3p	-0.939976	7.00792	0.0131146	0.371924	88.04	168.89	79.54	98.99	228.64	40.35	152.33	148.27	204.62	85.94	159.89	86.09
mml-miR-190a-5p	1.83761	6.04159	0.0141626	0.371924	102.4	28.67	91.85	73.28	5.83	18.41	22.31	7.9	16.01	321	25.92	72.87
mml-let-7d	0.827844	11.5427	0.0170103	0.371924	3816.25	2149.93	3701.36	1814.07	2257.95	6140.7	1469.67	2544.47	2918.8	3589.2	2289.14	3105.51
mml-miR-101-3p	1.14823	9.44354	0.0183657	0.371924	959.29	432.81	858.62	723.21	510.95	2115.02	141.23	494.87	584.9	682.96	203.74	644.96
mml-miR-20b-5p	0.884105	4.4791	0.0206729	0.371924	28.6	15.49	26.82	20.99	18.97	31.73	7.62	28.1	22.81	29.79	7.06	26.54
mml-miR-301a-3p	1.03043	3.50228	0.0207601	0.371924	14.88	7.27	11.53	9.79	7.59	25.59	2.14	9.53	12.61	13.02	4.21	14.71
mml-miR-382-5p	1.18253	5.92533	0.0233749	0.371924	84.03	37.01	66.85	58.59	31.85	192.08	15.1	33.37	66.34	83.61	13.17	44.24
mml-miR-330-5p	-0.853676	3.43774	0.0245558	0.371924	7.56	13.64	6.22	7.17	11.11	5.48	19.91	11.54	13.05	5.51	16.97	9.05
mml-miR-29c-3p	0.962011	8.96361	0.0249784	0.371924	659.47	338.53	593.45	523.65	361.87	1272.25	121.19	402.67	443.12	462.18	242.83	566.82
mml-miR-15a-5p	0.941524	11.0216	0.0251088	0.371924	2733.88	1423.47	3102.73	1925.13	1547.5	4647.77	542.76	1489	2160.65	2437.05	941.31	1992.83
mml-let-7f-5p	0.96055	12.9587	0.0273783	0.373609	10516.6	5404.04	9169.83	5265.55	4941.47	21000.4	3683.06	5198.33	10456.1	8270.88	2674.08	8943.64
mml-let-7e-5p	0.848208	4.88628	0.0283754	0.373609	37.72	20.93	32.39	23.61	18.84	71.69	13.5	21.33	31.58	31.37	17.1	31.81
mml-let-7a-5p	0.777583	14.9209	0.0417835	0.477446	39182.6	22856.8	38534.7	19547.8	21180.2	70569.1	17954.3	23479.3	39307.4	33050.2	16294.5	30279.6
mml-miR-1260b	-0.715171	5.64383	0.0449368	0.477446	37.69	61.85	44.82	38.13	58.55	35.52	62.13	41.65	40.79	32.46	109.67	34
mml-miR-21-5p	0.752921	9.03238	0.0464904	0.477446	656.93	389.83	748.51	545.51	342.08	984.32	164.35	507.79	418.99	631.4	478.19	412.64
mml-let-7b-5p	0.793037	12.2903	0.046626	0.477446	6351.63	3665.67	5212.63	3234.78	3214.8	13042.7	2119.99	3991.57	5586.6	4890.2	4172.16	4621.08
mml-miR-363-3p	0.77263	4.54316	0.047949	0.477446	29.09	17.06	36.66	28.16	19.92	16.06	10.29	42.02	10.09	28.04	16.83	22.67
mml-miR-379-5p	1.00821	3.87095	0.048349	0.477446	19.22	9.55	15.67	18.01	6.37	39.96	2.81	11.16	16.23	18.86	4.34	10.44
mml-miR-1249	-1.02913	6.96286	0.0533895	0.483549	81.91	167.15	66.85	104.07	81.59	28.47	181.19	207.11	98.36	72.93	370.55	34.2
mml-miR-92b-3p	-0.858851	7.69994	0.0536513	0.483549	147.63	267.77	105.32	180.32	121.3	73.13	400.32	225.55	167.11	108.22	469.77	225.95
mml-miR-296-5p	-0.586542	10.2749	0.0618242	0.483549	990.36	1487.14	1137.79	1075.81	1406	937.05	1844.6	1105.27	1298.21	835.07	1811.09	936.62
mml-miR-98	0.761636	6.45696	0.0634618	0.483549	110.21	64.96	103.89	51.07	67.49	191.56	41.96	62.85	126.54	111.23	37.73	81.51
mml-miR-146a-5p	0.664312	7.77702	0.0657755	0.483549	268.68	169.52	243.93	172.98	203.3	518.01	164.35	192.05	133.23	209.77	173.74	179.63
mml-miR-196b-5p	0.846407	3.95846	0.0673506	0.483549	19.67	10.91	18.01	13.12	9.22	40.87	5.48	8.78	21.05	17.77	5.7	12.92
mml-miR-106b-5p	0.718678	6.22994	0.0678393	0.483549	93.08	56.54	121.51	66.46	62.89	138.55	19.78	67.11	77.53	72.34	56.06	65.91
mml-miR-374a-5p	0.772223	6.47261	0.068397	0.483549	111.72	65.44	135.63	130.65	55.97	187.38	28.59	63.22	59.43	93.62	52.53	78.73
mml-miR-324-5p	-0.618214	7.79093	0.0762889	0.483549	174.55	267.91	165.04	167.55	212.24	143.9	387.36	203.59	266.57	115.06	305.81	245.14
mml-let-7g-5p	0.772715	12.3874	0.0801792	0.483549	6758.84	3956.01	7575.14	3816.33	3738.36	12368.9	1930.92	3647.49	8167.78	5321.18	2126.66	4881.53
mml-miR-15b-3p	-0.646976	11.5348	0.0805595	0.483549	2312.43	3621.02	2021.16	3833.29	3104.89	1099.1	4738.78	3441.38	2712.98	1616.16	3715.15	3384.35
mml-miR-16-5p	0.719109	16.9731	0.0819451	0.483549	160071	97238.5	157740	112822	90714.1	307691	64665.1	84740.9	165384	116640	52606.4	133541
mml-miR-20a-5p	0.744211	6.87595	0.082651	0.483549	146.8	87.6	244.97	89.55	97.04	191.17	31.53	92.7	156.92	107.55	62.98	97.62
mml-miR-491-5p	-0.623476	7.65269	0.0838887	0.483549	158.24	243.75	176.83	133.27	243.55	126.27	239.98	223.41	198.7	151.95	403.26	112.73
mml-miR-199a-3p	0.770809	4.9761	0.0869403	0.483549	39.39	23.05	50.39	23.26	26.02	73.39	10.16	15.3	40.9	28.95	14.93	28.93
mml-miR-432-5p	0.834886	5.27844	0.0873945	0.483549	49.42	27.7	31.61	44.25	21.69	110.86	10.56	22.08	46.27	50.57	15.75	32.01
mml-miR-26b-3p	-0.584532	6.17047	0.0887555	0.483549	57.45	86.17	47.54	97.94	81.59	52.1	102.35	71	46.49	41.64	102.48	74.95
mml-miR-664	-0.632551	3.41977	0.09246	0.483549	8.2	12.72	8.42	6.82	15.45	3.92	15.1	10.04	10.09	8.68	16.15	9.94
mml-miR-93-5p	0.693473	15.3072	0.0971061	0.483549	50103.7	30982.2	45723.6	29894.9	32954.7	87967	14250.3	33583.4	60050.5	38804.5	17760.9	44439.9
mml-miR-493-5p	0.916245	3.15974	0.0976718	0.483549	11.38	6.01	10.49	9.09	4.88	28.6	2.27	4.14	10.97	10.18	2.85	3.48
mml-miR-7180-5p	-0.74883	6.88891	0.0984985	0.483549	88.25	148.31	66.85	67.16	126.72	39.44	145.11	157.43	82.35	85.69	320.19	91.85
mml-miR-627-5p	0.524002	6.1994	0.100523	0.483549	86.39	60.09	70.47	69.61	56.38	114.78	71.09	80.16	48.8	68.84	54.56	97.72
mml-miR-197-3p	-0.590068	11.7259	0.100967	0.483549	2703.78	4070.05	2725.24	2729.32	2946.45	2188.28	4954.58	3314.06	2634.36	2296.87	7085.53	2994.47
mml-let-7b-3p	-0.735952	5.8787	0.101721	0.483549	43.97	73.27	27.2	77.48	64.11	15.93	101.15	75.01	24.67	41.05	98.95	60.64
mml-miR-148b-3p	0.593821	9.29723	0.103724	0.483549	756.51	501.28	404.7	657.63	474.36	1178.49	372.53	711.63	316.68	699.73	685.18	788.01
mml-miR-486-5p	-0.590892	17.3029	0.104239	0.483549	129036	194352	165251	142273	135047	84237.1	244100	152777	139315	92899.8	311024	150017
mml-miR-130b-5p	-0.575662	6.05863	0.104281	0.483549	53.35	79.49	68.14	49.5	81.59	36.95	68.68	72.38	71.71	45.56	125.96	43.74
mml-miR-125b-5p	-0.759641	9.39624	0.106095	0.483549	500.21	846.89	468.05	273.19	586.99	361.45	833.25	297.93	2054.28	738.12	486.74	635.52
mml-miR-190b	0.649098	4.9138	0.111999	0.500827	36.52	23.24	55.19	18.01	27.51	33.56	12.43	28.35	46.71	32.29	11.54	33.2
mml-miR-26b-5p	0.670673	11.0798	0.119394	0.507561	2658.45	1670.03	2000.43	1364.57	1751.61	5864.65	1379.88	1453.63	2941.17	2137	912.94	1836.56
mml-miR-532-3p	-0.513056	9.65142	0.119717	0.507561	662.51	945.43	695.66	694.53	794.48	597.02	1428.25	761.43	853.78	471.44	956.1	787.01
mml-miR-6827-3p	-0.505968	4.33496	0.120131	0.507561	16.46	23.42	13.86	21.34	19.92	12.67	27.66	14.05	25.22	20.94	22.94	20.78
mml-miR-636	-0.63006	4.42705	0.122294	0.507561	16.71	25.84	17.62	12.07	19.65	10.84	32.47	24.59	18.2	10.93	46.83	19.58
mml-miR-34a-5p	0.688957	6.67831	0.124399	0.507561	126.11	78.21	63.35	68.39	101.78	273.18	28.59	69.62	109.87	123.83	82.39	100.6
mml-miR-484	-0.639461	13.7973	0.12996	0.507561	11131.5	17340.1	14397.9	6589.38	23344.2	5595.92	14872.1	16802.4	12197.8	9998.94	29696.9	8862.53
mml-miR-1226	-0.536992	8.00918	0.132209	0.507561	210.03	304.76	145.35	216.53	220.1	154.61	428.51	266.06	262.84	176.48	395.8	307.67
mml-miR-340-5p	0.621705	7.07134	0.133371	0.507561	162.72	105.77	135.12	163.18	153.29	240.79	32.87	127.83	96.17	200.01	83.34	109.85
mml-miR-6529-3p	-0.601584	5.07881	0.134956	0.507561	26.66	40.46	19.95	25.01	42.56	13.45	67.88	40.77	25.33	20.36	41.53	38.77
mml-miR-23b-3p	-0.473017	9.93239	0.137668	0.507561	818.15	1135.62	792.94	1043.98	1436.09	630.05	1221.14	1022.73	759.25	845.5	1217.66	799.54
mml-miR-183-5p	0.689275	2.90005	0.14725	0.507561	8.93	5.5	5.57	4.02	6.51	22.85	4.14	4.27	9.43	6.01	3.39	5.96
mml-miR-500a-5p	-0.532892	3.90243	0.150638	0.507561	12.04	17.41	14.77	11.37	20.6	8.1	17.77	16.31	10.97	12.27	26.33	8.75
mml-miR-10a-5p	-0.456469	6.0394	0.152763	0.507561	55.25	75.84	47.15	78.88	85.79	43.22	76.03	65.61	52.85	52.15	85.65	68.09
mml-miR-23a-3p	-0.46787	11.463	0.154155	0.507561	2368.97	3276.47	1909.88	3199.8	3636.3	1986.14	3384.96	2933.72	1891	2422.95	4270.3	2592.16
mml-miR-338-3p	0.68368	4.43792	0.154191	0.507561	26.42	16.47	13.47	31.83	14.23	56.41	6.95	17.06	7.24	21.69	22.12	23.46
mml-miR-18a-3p	-0.642754	9.53751	0.155177	0.507561	580.11	905.73	686.59	375.34	762.63	265.99	875.07	913.72	492.9	545.37	2022.69	488.89
mml-miR-324-3p	-0.46212	7.52585	0.155788	0.507561	154.83	213.27	141.98	137.82	194.89	141.94	254.81	184.27	200.45	121.57	278.39	184.4
mml-miR-199a-5p	0.653939	3.71252	0.156862	0.507561	15.68	9.98	8.03	10.84	10.84	4.7	10.02	12.04	8.44	14.94	9.77	38.67
mml-miR-660-5p	0.482326	5.43761	0.157293	0.507561	50.23	35.97	45.47	49.67	44.59	58.89	18.57	53.81	30.37	46.73	36.65	46.22
mml-let-7c-5p	0.556405	7.17773	0.162886	0.507561	172.07	116.96	147.81	84.13	101.92	313.52	78.17	94.83	214.6	178.15	106.01	126.05
mml-miR-28-3p	-0.476839	7.72954	0.163363	0.507561	177.28	246.73	125.53	218.8	187.44	233.74	393.11	168.22	172.49	164.29	261.83	194.64
mml-let-7i-5p	0.635423	13.3923	0.163515	0.507561	13082	8421.53	13482.4	6665.63	9459.68	21446.6	2959.38	8543.12	18896.7	10754.3	4126.28	11183.6
mml-miR-151-3p	-0.539181	10.3989	0.16708	0.507561	1100.59	1599.33	708.35	1324	1757.03	942.01	2820.82	1466.17	895.44	716.84	1199.34	1669.56
mml-miR-369-5p	0.566612	4.04246	0.168426	0.507561	19.36	13.1	18.01	23.96	9.35	22.98	5.21	14.8	17.33	27.29	9.64	13.72
mml-miR-7180-3p	-0.495615	4.57707	0.169758	0.507561	19.62	27.62	12.7	16.27	27.11	25.46	21.25	24.08	42.55	19.36	30.95	16.5
mml-miR-30d-3p	0.490078	3.21412	0.170978	0.507561	10.56	7.51	9.97	10.49	5.56	14.36	4.54	9.91	9.65	9.6	7.33	8.95
mml-miR-424-5p	0.602086	5.96599	0.172027	0.507561	75.1	49.46	75.78	66.11	37.41	146.12	23.52	71.5	62.83	59.91	57.42	22.17
mml-miR-361-3p	-0.474378	11.8439	0.17347	0.507561	3076.71	4274.51	2635.85	2342.62	4780.19	2624.29	6167.7	3787.73	4854.87	2401.34	3227.19	3934.37
mml-miR-340-3p	-0.452201	6.90342	0.180034	0.509798	100.89	138.08	98.71	164.58	139.6	61.11	161.41	114.91	91.78	87.78	133.02	141.95
mml-miR-942-5p	-0.476103	11.3016	0.180238	0.509798	2111.22	2936.63	2359.92	1718.92	2622.8	1640.36	3961.66	3057.91	2343.77	1436.1	4036.02	2061.82
mml-miR-423-3p	-0.526352	12.6685	0.181582	0.509798	5335.38	7684.44	6339.28	4836	5413.66	4421.34	8088.6	7276.28	4335.66	4595.99	15748.3	4044.02
mml-miR-103-3p	0.522803	12.6469	0.182839	0.509798	7562.86	5263.85	7243.89	4610.55	5755.88	13961.8	2999.47	4814.35	8910.25	6581.04	4043.08	5213.16
mml-miR-106a-5p	0.51283	6.00403	0.193106	0.532164	75.19	52.66	76.69	54.92	60.31	119.61	22.31	51.68	89.81	66.92	35.97	61.04
mml-miR-29a-3p	0.567866	7.51774	0.202873	0.54607	218.59	147.47	170.61	207.78	188.66	455.34	76.7	148.52	57.24	178.31	206.99	140.17
mml-miR-130b-3p	0.471689	4.98684	0.203078	0.54607	36.59	26.33	41.45	18.71	27.11	59.54	21.38	27.47	43.53	23.36	20.9	31.11
mml-miR-500b-5p	-0.44735	3.64211	0.206308	0.54607	10.37	14.13	12.7	9.79	15.04	7.97	16.17	13.92	10.64	10.43	19	6.86
mml-miR-7204-3p	-0.437524	6.24627	0.210137	0.54607	64.29	87.07	55.45	68.74	103.41	41	102.35	93.96	59.32	49.23	101.53	81.81
mml-miR-18b	0.47752	4.51162	0.21457	0.54607	26.28	18.85	28.37	20.99	23.18	35.13	8.15	26.47	30.37	22.45	11.54	18.99
mml-miR-454-3p	0.495048	8.92833	0.215732	0.54607	569.68	404.16	609.77	333.36	417.98	759.33	218.73	398.66	839.96	536.19	210.79	544.46
mml-miR-1262-3p	0.654304	3.38972	0.220486	0.54607	12.47	7.94	7.9	5.77	3.79	9.01	4.14	5.02	4.39	13.1	21.58	27.34
mml-let-7i-3p	-0.397537	4.64045	0.220918	0.54607	21.35	28.07	25.39	22.56	31.99	23.5	27.66	25.09	28.84	14.27	29.32	18.49
mml-miR-93-3p	-0.518556	10.9646	0.220922	0.54607	1642.87	2353.43	1815.18	1059.2	2698.7	572.34	3081.78	2883.29	1854.05	1203.3	3073.4	1740.24
mml-miR-92a-3p	-0.440586	16.8376	0.221193	0.54607	99375.2	134868	140055	90878.6	107279	109098	149670	97487.7	94662.8	77639.9	231847	72595.5
mml-miR-335-3p	-0.594798	4.58647	0.224753	0.549139	18.95	28.63	22.02	16.97	20.6	5.88	14.56	25.59	16.78	18.69	74.25	22.57
mml-miR-138-5p	0.507403	3.01975	0.227865	0.551062	9.22	6.48	7.9	5.77	11.38	10.71	3.87	8.53	7.57	14.77	3.8	4.18
mml-miR-17-5p	0.453335	8.37751	0.235414	0.551298	384.12	280.51	382.81	292.78	312.67	611.51	148.58	274.97	477.77	334.51	170.75	316.81
mml-miR-130a-3p	0.456228	3.72179	0.237596	0.551298	14.99	10.89	15.42	10.14	11.52	26.77	7.88	7.65	16.78	13.1	8.14	12.03
mml-miR-126	0.627713	10.1043	0.240963	0.551298	1336.28	864.82	1665.56	1055.87	830.26	2685.4	365.05	396.27	1844.18	1132.04	228.71	802.12
mml-miR-199a	0.548698	3.89768	0.241668	0.551298	17.37	11.9	9.33	13.12	13.01	5.09	12.43	13.3	8.44	15.27	12.49	43.84
mml-miR-331-3p	-0.42821	11.6041	0.248438	0.551298	2654.22	3571.42	2400.73	2755.73	3210.06	1995.02	5259.49	3254.73	2019.08	1610.9	4612.75	4009.72
mml-miR-1240	-0.449798	3.88821	0.248567	0.551298	12.31	16.81	9.72	9.62	11.93	9.4	27.93	13.67	17.87	8.09	16.7	20.68
mml-miR-187-5p	-0.496177	5.43437	0.24915	0.551298	35.68	50.39	39.64	94.8	42.83	14.63	22.31	53.56	34.98	45.14	57.01	25.45
mml-miR-30d-5p	-0.365475	13.0936	0.249882	0.551298	7639.83	9842.43	7267.21	9458.97	9557.39	8046.01	12230.8	8777.57	7228.14	5182.83	10736.9	8925.55
mml-miR-191-3p	-0.368209	6.48035	0.251867	0.551298	77.74	100.37	51.43	109.49	129.16	90.62	85.38	90.69	80.49	74.26	97.32	81.71
mml-miR-1306-5p	-0.41476	7.75787	0.253679	0.551298	185.35	247.07	164.91	176.65	150.03	190	371.73	208.23	218.1	106.55	318.84	257.07
mml-miR-29c-5p	-0.429809	6.23215	0.253809	0.551298	63.86	86.02	56.35	56.67	83.76	35.65	108.5	94.58	52.63	50.48	128.54	82.21
mml-miR-15b-5p	0.474132	13.4366	0.255877	0.551298	12892.2	9281.06	11578.1	11202.7	10349.2	30085.5	7268.85	6728.72	8857.62	9644.82	8726.95	6423.85
mml-miR-671-3p	-0.396143	7.8482	0.260598	0.556413	198.8	261.6	207.53	170.18	182.83	164.92	379.48	249	196.94	154.03	378.56	218.5
mml-miR-339-3p	-0.388472	9.52225	0.267521	0.564473	636.74	833.48	978.06	715.52	735.8	450.63	852.22	757.17	608.04	543.03	1255.8	454.79
mml-miR-32-5p	0.470055	3.74865	0.269137	0.564473	15.35	11.08	25.78	17.32	8.13	18.54	3.61	11.67	13.16	9.43	13.17	11.33
mml-miR-133c-3p	-0.595514	3.33799	0.286845	0.596335	7.83	11.89	7.25	15.04	5.01	1.04	12.83	2.01	16.78	10.76	9.77	18.09
mml-miR-431	0.453445	4.70854	0.293799	0.605481	29.93	21.86	26.04	30.61	25.07	42.7	6.41	27.47	29.17	40.64	18.05	12.82
mml-miR-185-5p	0.341393	11.6381	0.305121	0.620834	3562.3	2811.63	2711.24	1866.36	3558.24	4280.57	2253.74	3585.52	2478.43	3042.83	3901.37	4191.34
mml-miR-339-5p	-0.333843	14.2859	0.30887	0.620834	17673.6	22275.2	21869.8	19637.3	20036.1	13336.2	27007.8	22163.1	15547.5	14630.5	29147.2	16368.2
mml-miR-181b-5p	0.403022	5.63753	0.311284	0.620834	56.42	42.63	62.83	19.59	55.03	88.8	31.8	44.66	45.4	59.99	61.35	25.85
mml-miR-582-3p	-0.776319	2.8415	0.311727	0.620834	5.12	8.82	1.17	21.69	9.35	1.44	0.4	5.64	3.18	1.17	9.5	16.2
mml-miR-187-3p	0.353519	9.56488	0.31484	0.621669	849.43	664.84	800.07	897.24	773.21	987.58	289.95	722.92	783.82	1025.9	579.99	710.67
mml-miR-222-3p	-0.378545	8.03	0.317621	0.621669	227.1	295.17	357.28	127.68	282.72	256.46	297.17	201.46	450.24	168.8	318.02	151.5
mml-miR-151-5p	-0.331735	6.48657	0.320015	0.621669	79.19	99.69	51.43	101.62	126.86	85.27	116.38	88.81	68.21	66.67	85.38	103.78
mml-miR-1271-5p	-0.435041	7.33484	0.325999	0.622342	137.12	185.34	121.77	177	137.97	161.27	329.1	281.62	127.2	60.58	155.41	60.34
mml-miR-148a-5p	-0.403693	3.32596	0.329275	0.622342	8.42	11.17	7.77	8.75	11.38	6.53	6.68	7.65	5.26	10.68	23.75	9.44
mml-miR-181a-5p	0.398127	6.8832	0.332192	0.622342	133.97	101.63	134.99	55.09	134.85	246.28	70.95	86.56	86.41	134.42	160.84	67.6
mml-miR-107-3p	0.365384	8.02309	0.33469	0.622342	292.64	227.13	317.64	206.03	268.76	499.34	128.14	207.73	348.37	262.34	184.33	176.15
mml-miR-221-3p	0.397724	11.6284	0.336902	0.622342	3599.31	2732.02	4363.72	1327.14	3380.96	5409.97	1588.32	2825.46	4983.17	3610.14	2380.48	1787.26
mml-miR-370-3p	0.493299	5.03348	0.337047	0.622342	38.03	27	34.46	39	19.92	94.93	13.9	13.17	47.92	31.79	14.25	15.81
mml-miR-30e-3p	-0.308269	8.41105	0.339936	0.622342	303.95	376.37	271.27	388.45	298.17	267.17	491.05	369.05	267.67	247.74	436.52	364.53
mml-miR-628-3p	0.337221	3.38884	0.341369	0.622342	11.42	9.03	8.68	9.27	7.05	18.02	9.49	7.28	9.32	11.68	10.04	11.43
mml-miR-30c-5p	-0.348711	13.6043	0.351518	0.633467	10955.5	13951	9139.52	13540.6	12561.5	6780.94	21053.9	12816.2	7069.69	8377.27	15529.2	17663.4
mml-miR-148b-5p	0.324092	3.99337	0.35365	0.633467	17.44	13.93	15.55	14.34	8.4	22.46	12.83	16.18	12.61	13.43	21.45	19.58
mml-miR-186-5p	-0.337759	11.6672	0.35549	0.633467	2872.95	3630.82	2565.64	3550.3	3386.38	1663.73	4027.26	4108.49	2001.1	2144.59	5189.07	3882.28
mml-miR-152-3p	0.366699	3.20425	0.367446	0.646027	10.11	7.82	13.73	8.22	5.69	12.93	7.48	3.64	12.94	10.1	4.75	10.14
mml-miR-337-5p	0.519901	2.37428	0.368497	0.646027	5.82	4.09	4.53	10.49	3.25	10.71	0.53	2.38	4.39	8.09	1.76	3.38
mml-miR-19a-3p	0.308479	7.10994	0.373209	0.646027	152.57	123.23	141.2	193.96	135.53	173.67	61.87	126.82	112.94	145.77	111.84	175.36
mml-miR-329-3p	-0.350775	3.22556	0.373479	0.646027	8	10.24	8.42	12.24	12.2	3.26	6.28	11.04	9.87	12.1	10.59	5.17
mml-miR-128a-3p	-0.318187	12.0288	0.376168	0.646027	3719.41	4637.23	2761.77	4361.84	4252.57	2740.89	6910.75	5383.86	2682.06	2746.78	4978.96	4963.74
mml-miR-335-5p	0.430835	4.12323	0.384692	0.647968	19.7	14.65	12.31	18.19	10.44	15.02	5.75	19.07	3.84	23.7	35.02	28.43
mml-miR-376a-3p	0.382994	4.32194	0.385358	0.647968	22.35	17.2	19.17	41.8	13.82	24.94	5.75	20.07	12.94	26.2	11.67	21.37
mml-miR-503-5p	0.40565	7.08206	0.386907	0.647968	154.17	116.33	127.86	76.08	88.23	354.92	100.48	143.63	190.36	106.55	126.5	37.87
mml-miR-128b-3p	-0.313811	11.8144	0.390558	0.647968	3211.14	3991.41	2481.95	3640.55	3536.82	2203.81	6021.79	4774.58	2363.95	2249.23	4393.95	4346.12
mml-miR-142-3p	-0.347231	13.7138	0.392919	0.647968	11826.5	15044.7	12010.1	25300.9	12221.3	7789.02	7640.84	16218.7	7174.41	9251.31	22885.9	13863.1
mml-miR-671-5p	-0.318714	4.62395	0.393702	0.647968	21.74	27.07	15.16	15.74	31.31	22.59	16.7	30.36	45.95	21.69	25.65	18.89
mml-miR-26a-5p	0.280568	11.9689	0.398422	0.651215	4397.04	3619.91	5722.77	3761.23	3402.92	6495.36	3663.29	3157.13	3280.23	3584.44	3991.91	3025.48
mml-miR-133d-3p	-0.481895	4.36833	0.409958	0.663849	17.01	23.8	12.82	36.2	9.35	2.48	23.25	3.89	31.47	21.69	18.73	44.14
mml-miR-29b-3p	0.277505	8.03347	0.411755	0.663849	286.87	236.67	263.62	284.21	155.45	353.74	233.57	240.22	226.99	180.4	283.14	396.34
mml-miR-140-5p	0.289795	6.26627	0.414939	0.664003	84.42	69.05	80.45	91.3	73.46	115.96	33.67	85.3	93.86	65.25	52.94	75.15
mml-miR-125a-5p	-0.270577	8.79276	0.417453	0.664003	401.79	484.7	419.34	390.55	412.96	338.6	698.42	249.76	455.84	489.3	465.7	511.95
mml-miR-376c-3p	0.3706	3.25059	0.428807	0.674805	10.43	8.12	8.94	17.49	6.1	8.36	1.87	9.41	5.92	17.11	9.23	8.35
mml-miR-361-5p	-0.264062	11.5197	0.430786	0.674805	2667.97	3203.84	2195.14	2258.14	3484.64	2528.57	4187.61	3534.21	2004.72	2537.26	4084.07	2544.65
mml-miR-194-5p	0.259817	8.25957	0.432786	0.674805	333.71	278.73	253.65	327.24	267.27	316.53	340.59	380.84	184.66	250.41	273.91	467.12
mml-miR-150-5p	-0.249572	14.384	0.439052	0.680101	19535.1	23224.3	18318	18807.4	28021.2	24298.8	27397.8	18660.2	14411.4	17980.4	27483.9	18418
mml-let-7f-3p	-0.357213	5.45444	0.464002	0.714081	38.22	49.01	20.21	64.89	51.91	8.23	43.96	53.69	20.51	31.96	63.79	77.04
mml-miR-505-3p	-0.290845	6.05717	0.474086	0.723101	59.68	73.05	39.9	95.85	41.47	65.55	82.98	70.12	24.56	66.67	120.4	56.17
mml-miR-7205-3p	0.293791	5.45098	0.475965	0.723101	47.9	39.08	41.2	42.68	25.34	27.42	62.8	62.72	47.59	31.54	16.97	76.64
mml-miR-323b-3p	-0.239186	6.53085	0.481871	0.727411	84.59	99.86	79.28	119.28	105.31	71.95	84.18	78.03	139.48	98.04	51.04	95.63
mml-miR-378a	0.259358	6.92773	0.48691	0.727674	132.41	110.57	122.68	65.41	116.01	230.08	80.04	96.09	177.64	113.31	113.74	99.91
mml-miR-337-3p	-0.2732	3.26488	0.489382	0.727674	8.47	10.3	6.35	19.41	8.13	5.09	6.81	9.91	11.29	11.35	5.84	9.64
mml-miR-30c-1-3p	-0.21688	5.06682	0.491257	0.727674	30.79	35.76	28.24	27.11	38.63	38.52	37.55	30.11	41.56	26.78	33.93	30.32
mml-miR-3200-3p	-0.245285	7.484	0.500815	0.73007	163.63	193.95	98.58	158.98	182.29	201.62	200.96	210.12	116.02	113.4	311.51	194.44
mml-miR-27a-3p	-0.262679	6.32524	0.502138	0.73007	72.69	87.24	50.13	140.79	88.1	94.54	30.2	71	66.23	63.08	110.89	84.7
mml-miR-142-5p	-0.215611	12.7486	0.50661	0.73007	6368.37	7394.95	6226.44	8845.07	7103.6	4591.36	5193.22	5968.17	8787.77	5951.49	7045.08	9104.39
mml-miR-425	-0.255224	14.3913	0.506969	0.73007	19592.2	23383.7	24554.7	14352.3	24805.5	10601.2	27252.3	27402.4	12558.8	16130	37949.3	19272.5
mml-miR-99a-5p	-0.278977	4.99542	0.50858	0.73007	28.58	34.68	30.96	13.47	31.04	16.06	25.52	21.2	51.65	51.4	51.71	23.26
mml-miR-654-3p	-0.237733	8.15565	0.514693	0.73007	261.5	308.4	236.03	595.54	273.91	205.8	208.18	330.04	268.66	290.87	195.73	244.74
mml-miR-6790-3p	-0.248727	4.28047	0.515482	0.73007	17.54	20.83	10.36	11.37	19.38	12.8	27.79	29.1	19.41	14.18	26.2	21.27
mml-miR-378d	0.242711	4.25513	0.517518	0.73007	20.46	17.23	20.86	10.32	18.03	35.65	13.63	16.31	25.33	16.86	18.87	12.62
mml-miR-424-3p	0.288782	4.92798	0.52561	0.737098	33.24	27.17	35.11	16.09	20.06	63.07	24.72	32.87	30.05	27.79	44.93	7.36
mml-miR-503-3p	-0.258865	5.81697	0.529091	0.737615	51.14	61.13	49.87	31.83	38.76	82.53	79.1	58.83	87.94	45.06	68	19.38
mml-miR-652	-0.215003	8.14173	0.545173	0.755286	261.22	303.15	354.18	177.87	276.48	295.9	240.65	258.16	374.03	243.48	446.7	154.38
mml-miR-494-3p	-0.200102	5.7006	0.54814	0.755286	48.17	55.38	46.38	77.13	59.09	41	54.25	49.17	55.6	60.74	30.81	43.54
mml-miR-584-5p	-0.249343	9.42738	0.561618	0.769385	628.97	747.59	434.23	363.44	945.6	1280.74	554.65	488.85	1279.46	618.46	594.78	322.58
mml-miR-140-3p	-0.193028	13.1843	0.568117	0.7712	8686.47	9930.05	7960.01	10157	10770.8	7855.62	12167.2	10425.8	5649.66	5677.63	10905.6	11513.3
mml-miR-1304	0.217639	5.60096	0.572238	0.7712	51.94	44.65	50.26	38.48	59.77	89.58	58.52	26.47	40.13	34.54	26.33	58.85
mml-miR-30b-5p	-0.209864	10.5935	0.572705	0.7712	1432.66	1657.03	1138.44	2232.95	1497.89	825.14	1811.6	1719.56	917.92	1077.47	1824.79	2402.69
mml-miR-4766-3p	-0.221676	4.66476	0.592434	0.793259	23.2	27.07	18.65	27.63	24.53	8.88	24.72	41.52	15.02	18.61	43.43	28.33
mml-miR-7186-3p	-0.187112	6.19255	0.603782	0.803912	68.18	77.64	66.59	99.17	48.79	42.44	105.96	110.77	62.06	53.74	72.21	67.4
mml-miR-532-5p	-0.165542	7.12019	0.610604	0.804257	130.94	146.82	107.91	110.54	177.41	164.27	157.54	153.17	181.92	111.64	106.69	117.7
mml-miR-421	0.163939	6.40665	0.610828	0.804257	89.39	79.8	69.7	79.23	65.87	100.42	104.89	87.81	58.34	79.19	90.67	109.85
mml-miR-1296-5p	-0.190238	7.05131	0.616154	0.805075	123.68	141.14	75.01	158.98	157.22	127.58	113.44	172.73	57.24	111.56	218.8	131.52
mml-miR-30e-5p	-0.156961	10.3641	0.618243	0.805075	1246.14	1389.37	1315.14	1740.96	1413.86	1206.96	1224.48	1405.83	1104.78	847.42	1462.79	1455.33
mml-miR-500a-3p	0.16161	4.62419	0.626121	0.807025	25.79	23.05	20.6	21.34	31.85	35.39	18.44	24.84	20.94	27.54	22.67	20.58
mml-miR-491-3p	-0.184203	3.80441	0.626551	0.807025	12.85	14.62	11.66	16.62	18.16	6.01	12.43	15.43	12.06	9.26	13.84	21.87
mml-miR-29b-2-5p	0.183136	4.41607	0.636747	0.815724	22.46	19.72	18.65	12.59	18.03	38.39	15.1	18.31	38.38	17.86	14.52	19.09
mml-miR-148a-3p	0.18378	9.48784	0.640462	0.816073	763.39	672.11	447.32	1006.55	610.03	999.47	275.52	489.22	878.01	839.75	590.44	1041.2
mml-miR-502-3p	-0.153694	4.71876	0.649992	0.823699	24.71	27.48	23.71	22.74	31.85	21.68	20.84	32.87	23.69	27.79	38.28	17.5
mml-miR-3122	0.155731	3.85609	0.653399	0.823699	15.02	13.44	13.73	8.05	18.7	17.76	12.56	17.31	18.64	13.77	9.23	12.53
mml-miR-24-3p	-0.135441	9.86264	0.667174	0.836615	887.11	974.41	716.77	910.71	1117.05	1175.75	718.47	965.4	1121.66	817.47	1004.15	760.17
mml-miR-191-5p	-0.153679	16.5926	0.676523	0.843873	93566.9	104084	71435.4	87049.2	94670.9	99411.8	173313	89665.4	60603.4	59469.9	104784	147852
mml-miR-299-5p	-0.132293	6.68919	0.692259	0.857683	98.22	107.71	98.71	175.25	100.16	77.57	85.65	102.99	92.66	126.33	84.83	85.49
mml-miR-485-3p	-0.129961	8.59805	0.694832	0.857683	369.82	404.7	346.79	528.02	285.02	341.21	451.1	338.44	511.65	444.49	247.71	378.15
mml-miR-296-3p	-0.139827	3.9759	0.701134	0.860978	14.74	16.27	7.38	19.76	15.04	18.54	12.83	17.81	10.09	13.77	23.62	16.2
mml-miR-182	0.149952	5.1471	0.711808	0.86958	37.03	33.35	22.93	25.89	37	67.25	51.71	25.97	36.41	24.87	15.75	44.14
mml-miR-192-5p	0.14484	9.0583	0.723444	0.879263	559.58	506.16	370.89	585.39	509.6	249.41	604.76	800.32	254.73	387	576.32	990.3
mml-miR-200c-3p	-0.191471	3.66911	0.728966	0.879704	11.65	13.26	9.72	8.57	7.32	22.46	6.95	4.39	38.71	10.93	4.75	10.74
mml-miR-185-3p	0.128962	3.99912	0.731231	0.879704	16.47	15.04	15.42	11.37	14.1	25.99	13.5	15.93	10.31	11.01	25.92	14.02
mml-miR-30a-3p	0.127313	4.69882	0.740221	0.882972	26.83	24.61	15.29	34.28	23.99	31.6	14.3	15.3	27.52	31.62	22.94	40.36
mml-miR-7186-5p	0.122998	5.72787	0.744806	0.882972	55.03	50.5	68.66	47.92	41.47	94.41	56.65	46.54	55.81	44.39	50.63	21.17
mml-miR-132-3p	0.126716	2.9203	0.748245	0.882972	7.64	7.01	9.46	6.12	10.16	6.27	6.28	6.52	4.61	10.76	7.87	5.17
mml-miR-374b-5p	0.100407	6.96063	0.74885	0.882972	128.65	119.99	173.2	139.05	109.78	144.55	120.12	108.13	125.66	115.57	105.33	101.79
mml-miR-26a-2-3p	0.117289	3.62699	0.761947	0.889811	12.6	11.64	15.42	16.44	10.57	6.53	9.75	13.05	9.76	8.51	11.67	19.48
mml-miR-423-5p	-0.101244	11.8631	0.762159	0.889811	3594.4	3855.69	3917.83	2889.36	3513.24	4654.69	3822.69	3107.96	2873.62	2901.23	6179.52	3390.31
mml-miR-365-3p	0.110276	3.68961	0.768977	0.89012	13.16	12.15	12.18	7.7	13.15	10.32	8.42	22.96	13.6	10.01	17.92	10.34
mml-miR-331-5p	-0.103793	5.47204	0.772798	0.89012	42.59	45.71	48.58	32.88	36.59	68.95	52.24	38.76	55.92	26.95	50.9	29.72
mml-miR-27b-3p	0.0941438	8.23456	0.777831	0.89012	310.78	291.14	258.05	376.74	287.19	500.78	219.4	272.46	318.44	268.93	253.96	253.69
mml-miR-362-5p	-0.102724	4.4768	0.782316	0.89012	21.24	22.81	17.49	15.39	22.77	20.11	22.45	27.35	12.72	24.95	40.72	16.3
mml-miR-19b	-0.0957184	12.2782	0.78448	0.89012	4802.12	5131.58	3987.52	6820.59	5474.79	3362.72	4491.45	5476.31	2738.09	4227.35	6132.96	6956.68
mml-miR-320b	0.120583	5.27911	0.784958	0.89012	40.21	36.96	48.19	17.84	29.27	49.1	20.31	36.88	24.01	39.13	93.38	27.73
mml-miR-30a-5p	0.127371	6.66818	0.792716	0.894636	105.91	97	41.97	176.82	111.68	113.34	31.13	54.32	95.07	93.87	70.31	226.05
mml-miR-409-5p	0.101586	3.76793	0.796605	0.894765	13.83	12.93	10.49	20.11	13.96	14.1	6.81	14.3	13.05	21.11	10.72	9.15
mml-miR-381-3p	-0.0957736	5.09161	0.802106	0.896694	32.73	35.03	33.29	72.76	31.31	34.87	18.97	32.87	30.81	34.71	21.31	27.93
mml-miR-144	-0.119636	6.41166	0.806213	0.897054	81.4	88.46	102.34	185.39	97.72	144.42	18.97	40.64	73.03	59.08	67.19	60.54
mml-miR-106b-3p	-0.0813876	11.4622	0.810883	0.898034	2741.73	2900.79	3376.72	1791.68	3187.97	3413.91	2462.32	2841.77	3476.07	2433.55	3585.93	1642.72
mml-miR-22	-0.0688608	10.5713	0.820684	0.904661	1484.97	1557.56	1485.88	1716.47	1649.96	1715.7	1375.74	1692.34	1322.66	1289.83	1722.99	1241.11
mml-miR-134-5p	0.0898776	5.28464	0.830659	0.911417	39.95	37.51	33.16	41.98	39.85	71.95	20.04	25.72	67.11	41.89	18.6	27.04
mml-miR-320a	0.0840693	11.3566	0.843414	0.921148	2698.4	2545.63	3496.93	1297.76	2248.33	3302.78	1433.86	2385.66	1690.99	2373.55	6057.22	1933.09
mml-miR-181a-3p	-0.0733103	4.00847	0.855496	0.930058	15.43	16.28	10.88	18.19	23.45	10.97	8.15	19.69	8.11	20.61	23.48	15.01
mml-miR-99b-5p	-0.0558013	5.9616	0.869876	0.934863	60.85	63.29	52.85	58.77	48.93	56.67	86.05	38.01	48.58	82.36	74.11	74.36
mml-let-7a-3p	-0.0746311	6.73512	0.875219	0.934863	103.53	109.07	67.88	184.35	91.08	32.12	62.8	146.77	49.56	76.35	157.59	194.54
mml-miR-576-5p	0.0668516	5.85069	0.877257	0.934863	58.78	56.14	47.8	51.07	89.04	19.72	39.68	70.37	34.65	45.06	66.24	110.94
mml-miR-196a-5p	0.0657188	7.87857	0.879542	0.934863	240.45	229.74	187.19	296.98	254.12	441.62	264.56	112.65	260.98	296.55	72.07	164.22
mml-miR-543-3p	0.066556	3.26198	0.879639	0.934863	9.55	9.17	8.42	13.64	9.62	10.71	7.62	8.78	4.5	15.77	10.45	4.08
mml-miR-1180-3p	-0.0530207	8.66932	0.888084	0.939625	399.42	414.34	455.22	236.29	383.82	489.16	273.25	413.46	412.52	410.03	765.81	229.24
mml-miR-409-3p	-0.0410182	9.8878	0.903947	0.952158	933.67	960.62	750.32	1361.08	860.49	1171.83	920.1	843.22	1160.7	985.93	500.72	917.04
mml-miR-18a-5p	0.0410516	3.70686	0.919398	0.962089	13.01	12.62	15.93	12.59	15.18	12.8	3.87	14.3	18.42	10.1	13.03	11.93
mml-miR-451	-0.0391628	15.4489	0.923694	0.962089	44121.1	45335.3	57428.4	64575.3	42821.2	29780.2	20104.4	47351.1	20224.9	39384.8	78950.4	46661.2
mml-miR-342-3p	0.033993	9.88068	0.929069	0.962089	953.6	931.38	714.05	721.29	1378.08	1532.37	1134.42	1013.95	408.9	872.79	1014.2	634.82
mml-miR-487b-3p	0.0325728	3.69407	0.929613	0.962089	12.84	12.58	11.4	18.89	10.57	15.93	10.29	12.29	14.04	16.02	9.09	8.55
mml-miR-6529-5p	0.0268133	7.91213	0.944195	0.9707	242.86	238.39	170.09	148.14	195.17	231.65	291.56	306.33	121.39	224.12	435.7	282.12
mml-miR-138-3p	-0.0284806	2.99993	0.946326	0.9707	7.67	7.84	6.09	6.82	10.71	8.49	7.88	7.4	5.37	8.93	8.42	7.46
mml-miR-210-3p	0.0258147	9.17257	0.950552	0.9707	581.99	571.63	549.27	560.38	611.92	1014.09	316.54	458.49	1107.74	475.36	261.56	412.74
mml-miR-323a-3p	-0.0192685	5.37077	0.954317	0.9707	40.85	41.44	32.52	65.06	37.68	48.97	35.41	37.63	38.93	50.23	30.13	34.89
mml-miR-154-5p	-0.0163564	5.56729	0.96094	0.97326	46.89	47.48	42.36	80.8	38.9	39.7	37.28	53.31	39.04	52.07	41.4	47.02
mml-miR-25	0.0126156	16.0221	0.96809	0.97633	66836.8	66254.9	60311.4	53776.8	57893.1	88779.2	84990.9	69385.4	66806.6	49702	67806.9	66006
mml-miR-223	-0.00496864	15.2122	0.988193	0.99238	37895.6	38026.4	25341.2	50198	39535.2	33263.1	29739.2	37348.8	29233.5	35283.5	41426	58241.3
mml-miR-1255a-3p	-0.000162558	3.24266	1	1	9.21	9.22	7.77	9.44	7.05	4.83	10.02	10.54	9.43	6.51	10.18	16.4

## Sheet: C. DE_miRNA_Grp6_vGrp5
DE_miRNA_Group6_vs_Group5_1
names	logFC	logCPM	PValue	FDR	Group6	Group5	Group5:3	Group6:5	Group6:9	Group5:11	Group5:15	Group6:17	Group6:21	Group5:24	Group5:26	Group6:29
mml-miR-16-2-3p	-2.18839	7.56716	0.000669222	0.161283	68.15	310.67	105.53	34.46	39.4	83.64	966.9	108.37	77.91	91.05	306.2	80.58
mml-miR-204-5p	-1.64736	4.29452	0.00303773	0.302359	9.37	29.42	59.24	10.79	6.43	13.2	48.6	6.78	5.97	7.22	18.82	16.91
mml-miR-338-3p	1.19965	4.46319	0.00476755	0.302359	30.42	13.24	12.46	42.58	42.2	15.58	6.82	21.08	25.26	18.94	12.38	20.96
mml-miR-9-5p	1.47959	2.85263	0.0050184	0.302359	10.26	3.68	4.03	4.48	7.88	4.13	1.77	4.32	21.74	6.28	2.21	12.86
mml-miR-194-5p	0.990553	8.32868	0.00675065	0.325381	427.41	215.11	243.31	383.23	360.55	222.31	176.74	456.68	389.25	218.46	214.73	547.36
mml-miR-197-3p	-0.997387	11.759	0.0147556	0.419205	2313.22	4618.09	2784.16	1532.22	1991.99	5800.18	6451.87	3741.69	1949.15	3968.13	4086.09	2351.03
mml-miR-130b-5p	-0.932037	5.86841	0.01503	0.419205	40.03	76.36	51.67	37.68	34.01	71.56	75.54	56.96	32.3	93.9	89.15	39.19
mml-miR-1260b	-0.997388	5.5985	0.0158072	0.419205	32.18	64.27	41.04	18.63	35.98	69.33	91.55	51.17	23.88	54.35	65.1	31.26
mml-miR-363-3p	0.945394	4.45921	0.024696	0.419205	28.65	14.88	17.71	24.23	23.95	19.4	6.12	39.7	24.51	19.42	11.77	30.82
mml-miR-26a-5p	0.946333	12.076	0.0250012	0.419205	5684.52	2949.98	2782.32	7202.09	8554.25	2995.74	1964.63	4768.97	3249.5	4930.3	2076.9	4647.82
mml-miR-374a-5p	1.228	6.72318	0.0255735	0.419205	147.75	63.08	60.34	196.1	317.31	76.49	32.12	47.59	56.06	116.87	29.58	121.71
mml-miR-34a-5p	1.33173	6.80424	0.0272465	0.419205	159.68	63.42	50.32	411.24	242.13	70.44	34.01	38.47	57.13	105.38	56.95	49.41
mml-miR-146b-5p	1.01543	3.05964	0.0285159	0.419205	10.84	5.34	5.62	7.14	14.31	4.13	1.53	8.38	14.39	6.99	8.45	9.95
mml-miR-142-5p	-0.930846	12.7002	0.0291797	0.419205	4579.43	8730.24	5744.2	3475.12	2556.71	7713.01	14135.6	3437.9	6565.08	7106.83	8951.51	6862.34
mml-miR-21-5p	0.981775	9.23606	0.0299054	0.419205	800.33	405.24	348.72	924.32	1647.82	369.24	363.84	496.25	373.37	608.72	335.69	559.86
mml-miR-146a-5p	0.963667	8.13402	0.0302141	0.419205	371.11	190.29	174.42	589.83	576.34	269.38	127.79	181.12	323.49	190.87	188.97	184.77
mml-miR-664	-0.899069	3.26256	0.0307939	0.419205	6.54	12.19	9.89	5.18	4.67	8.59	19.18	8.51	6.4	9.12	14.19	7.93
mml-miR-6827-3p	-0.828894	4.11566	0.0315877	0.419205	12.32	21.9	24.31	9.52	8.92	19.08	25.06	14.06	14.28	24.15	16.91	14.8
mml-miR-493-5p	1.53003	3.08795	0.0351153	0.419205	12.29	4.25	5.5	18.21	31.42	4.13	1.06	3.33	4.37	10.06	0.5	4.14
mml-miR-126	1.45487	10.1646	0.0357179	0.419205	1681.71	613.46	703.06	4314.84	2639.05	780.94	287.23	216.13	503.3	1166.06	130.01	735.21
mml-miR-133d-3p	1.08712	3.76774	0.0365282	0.419205	18.23	8.57	7.33	13.87	8.3	9.22	15.3	46.11	9.38	4.85	6.14	13.47
mml-miR-584-3p	-0.87348	4.84257	0.043316	0.45486	20.09	36.86	18.93	10.51	22.29	59	43.66	23.43	24.41	22.26	40.45	19.82
mml-miR-122a-5p	1.9511	7.1039	0.0434099	0.45486	218.32	56.46	5.62	828.65	172.45	160.29	13.41	59.06	21.21	88.09	14.89	10.22
mml-miR-296-5p	-0.770618	10.2291	0.0480938	0.482101	886.9	1513.08	1265.78	728.5	716.33	1971.82	2029.93	1128.5	989.97	894.32	1403.52	871.19
mml-miR-590-3p	1.44085	2.43437	0.0524391	0.482101	7.58	2.8	1.59	16.53	13.58	5.25	0.94	0.86	1.92	5.8	0.4	5.02
mml-miR-26b-5p	1.22899	11.2407	0.0538725	0.482101	3392.24	1447.18	1096.12	7780.99	5405.23	2103.49	566.23	758.87	1140.15	3019.46	450.6	1875.98
mml-let-7f-5p	1.24927	13.0591	0.0549327	0.482101	12014.5	5054.01	3143.99	25355.5	20199.7	6496.36	2531.33	1712.54	4048.15	11560.4	1537.95	8756.55
mml-miR-484	-0.892214	13.7691	0.0577455	0.482101	9776.03	18144.5	8727.33	4308.39	8389.16	18243.8	24230.6	20610.8	5916.29	15569.8	23951.2	9655.57
mml-miR-374b-5p	0.869803	6.90635	0.0594222	0.482101	154.75	84.69	121.78	190.21	262.76	85.07	43.42	91.98	68	117.81	55.34	160.82
mml-miR-29b-3p	0.717221	8.09774	0.0606717	0.482101	340.37	207.03	191.28	379.59	324.05	188.6	159.44	232.65	300.04	287.96	207.89	465.54
mml-miR-486-5p	-0.736708	17.2743	0.0698861	0.482101	118904	198138	130615	91183.5	79925.3	288704	208664	198695	97379	182579	180130	127338
mml-let-7g-5p	1.2014	12.5358	0.0709174	0.482101	8276.79	3599.19	2388.9	20936.3	12614.3	4011.23	1816.13	1430.69	2624.05	8647.76	1131.93	3778.56
mml-miR-27b-3p	0.682499	8.21807	0.0716467	0.482101	366.64	228.46	263.95	498.09	396.22	294.5	192.27	270.5	321.04	220.59	170.96	347.35
mml-miR-1226	-0.752041	7.99335	0.0720897	0.482101	189.69	319.52	200.32	138.81	101.31	508.86	355.13	234.75	213.6	263.33	269.98	259.98
mml-miR-1306-5p	-0.782083	7.86705	0.0755804	0.482101	171.52	295	174.67	148.89	84.93	572.15	303.71	200.97	213.28	207.21	217.25	209.52
mml-miR-532-3p	-0.712145	9.60343	0.0771107	0.482101	589.54	965.83	721.87	582.55	364.8	1447.54	1272.61	705.61	728.62	684.27	702.87	566.12
mml-miR-324-3p	-0.745357	7.55393	0.0783973	0.482101	140.25	235.14	125.56	83.76	99.86	334.41	298.88	209.6	178.75	171.93	244.92	129.29
mml-miR-30a-5p	1.04954	6.83091	0.0823955	0.482101	153.16	74.01	130.45	34.6	90.53	101.14	14.94	71.39	227.56	71.4	52.12	341.71
mml-miR-98	1.0973	6.51958	0.0831691	0.482101	124.74	58.3	38.6	215.57	255.92	76.49	26.12	26.63	39.54	132.5	17.81	86.04
mml-miR-628-3p	0.712924	3.42947	0.0841483	0.482101	13.1	7.99	7.57	18.07	16.69	9.54	5.53	7.64	11.72	10.77	6.54	11.36
mml-miR-301a-3p	0.967201	3.64634	0.086158	0.482101	16.28	8.32	6.72	31.24	27.58	10.34	6.12	4.44	7.03	15.63	2.82	11.1
mml-miR-92b-3p	-0.802176	7.70033	0.0874664	0.482101	151.41	264.08	207.28	46.92	116.35	205.13	329.6	204.3	92.62	320.17	258.2	296.88
mml-miR-339-5p	-0.678867	14.2604	0.0878433	0.482101	15090.7	24158.5	20460.6	14454.2	9339.74	24407.5	35387.3	20174.2	19590.4	16432.5	24104.4	11895.1
mml-miR-199a-3p	1.10193	5.31373	0.0880185	0.482101	53.96	25.16	17.71	84.46	123.71	57.72	8.94	18.86	16.52	35.17	6.24	26.24
mml-miR-196b-5p	0.997995	3.81052	0.0902724	0.483459	18.39	9.21	9.16	28.99	38.16	9.54	6.35	3.08	7.99	17.76	3.22	13.74
mml-miR-29a-3p	0.718859	7.74817	0.0927554	0.485958	267.19	162.34	181.99	248.76	305.07	198.77	79.43	162.13	445.85	138.06	213.43	174.11
mml-miR-155	0.779073	8.1642	0.0997326	0.491689	362.19	211.07	213.39	539.97	502.82	223.42	130.03	121.2	251.54	372.98	115.52	395.44
mml-miR-877-3p	-0.829009	3.76531	0.1014	0.491689	9.63	17.12	9.77	3.08	4.98	19.4	23.77	23.3	7.46	13.74	18.92	9.34
mml-miR-671-3p	-0.634666	7.74825	0.103934	0.491689	168.28	261.29	191.77	109.81	132	301.02	331.95	248.44	171.92	209.81	271.89	179.22
mml-miR-491-3p	-0.6937	3.68098	0.104359	0.491689	9.61	15.58	17.83	6.16	5.29	17.17	17.77	10.11	12.58	7.93	17.21	13.92
mml-miR-636	-0.690764	4.43226	0.104857	0.491689	16.35	26.39	14.29	12.05	11.41	31.64	30.95	29.71	11.83	23.56	31.5	16.73
mml-miR-190a-5p	1.22323	5.85021	0.106091	0.491689	80.48	34.45	44.34	185.45	25.2	6.36	84.96	3.7	136.43	15.16	21.43	51.61
mml-miR-16-5p	0.914522	17.0225	0.110167	0.494934	173967	92292.9	100956	362620	276096	103669	47000.8	40020.4	75738.5	172483	37355.2	115360
mml-miR-376a-3p	0.682945	4.17193	0.110898	0.494934	21.92	13.65	23.33	11.91	18.56	11.13	10.59	26.38	35.49	11.13	12.08	17.26
mml-miR-627-5p	0.634662	6.38617	0.118072	0.515822	101.48	65.36	66.69	167.8	95.5	78.08	49.07	53.02	109.36	77.91	55.04	81.73
mml-miR-6529-3p	-0.609428	4.76851	0.119859	0.515822	21.39	32.66	30.66	16.95	13.48	31.8	42.13	24.91	24.51	22.38	36.33	27.13
mml-miR-20b-5p	0.798946	4.56124	0.125148	0.529136	29.71	17.07	21.25	58.55	37.43	19.4	7.65	12.33	16.63	30.31	6.74	23.6
mml-miR-101-3p	0.869541	9.66319	0.129503	0.538105	1047.72	573.43	422.25	2090.82	1990.02	655.95	628.48	214.16	411.74	899.05	261.42	531.86
mml-miR-335-3p	-0.750039	4.29082	0.144461	0.585413	14.41	24.23	15.02	6.44	15.76	11.61	15.65	18.74	11.19	15.98	62.89	19.9
mml-miR-15a-5p	0.903555	11.2289	0.145746	0.585413	3127.88	1672.05	1556.97	6403.27	6337.03	1451.2	974.19	728.54	896.18	3633.87	744.02	1274.38
mml-miR-1262-3p	0.888363	3.65409	0.152983	0.597204	16.08	8.67	4.89	42.3	7.26	10.02	3.18	2.47	13.22	18.94	6.34	15.15
mml-let-7b-5p	-0.812646	12.7155	0.153637	0.597204	4879.85	8571.1	3366.78	9791.27	7810.34	6511.79	12131.4	1478.65	3472.69	16564.2	4281.3	1846.3
mml-miR-15b-5p	0.716894	13.6847	0.158289	0.605517	16373.3	9961.63	10803.8	34887.9	22309.8	13235.2	5359.42	5590.59	12486	13030	7379.75	6592.49
mml-miR-454-3p	0.804338	8.87642	0.1662	0.625847	597.41	342.09	319.53	1225.47	961.77	356.04	223.22	127.85	205.71	681.42	130.21	466.24
mml-miR-379-5p	0.864952	3.62883	0.169215	0.627399	15.69	8.6	15.63	29.13	28.41	6.04	3.18	4.81	6.93	16.46	1.71	9.16
mml-miR-1240	-0.606557	3.88332	0.173561	0.628839	11.5	17.57	12.21	9.8	5.6	26.56	23.18	8.63	13.75	10.18	15.7	19.73
mml-miR-361-3p	-0.548817	11.7471	0.174822	0.628839	2791.26	4083.32	2638.19	2223.88	1646.37	5046.28	5894.7	2977.28	3976.21	3575.38	3262.07	3132.57
mml-miR-320a	-0.564126	11.6299	0.180814	0.634018	2557.26	3780.88	1620.37	2422.64	3667.5	3610.66	3488.58	3047.06	2078.12	5344.72	4840.07	1571
mml-miR-421	0.495329	6.54802	0.184971	0.634018	109.21	77.46	73.29	131.24	99.65	76.65	61.19	73.98	129.08	79.1	97.1	112.11
mml-miR-148b-5p	0.564801	4.06244	0.188324	0.634018	19.67	13.27	9.53	26.19	24.26	8.43	10.12	19.23	10.98	24.51	13.79	17.7
mml-miR-132-3p	0.553385	3.11668	0.189884	0.634018	10.05	6.83	5.5	8.12	14	6.68	4.47	14.06	7.99	8.05	9.46	6.08
mml-miR-30d-3p	0.543605	3.34345	0.192069	0.634018	11.78	8.06	8.92	19.61	12.13	5.72	10	8.14	7.67	9.83	5.84	11.36
mml-miR-18a-3p	-0.605948	9.43974	0.193256	0.634018	550.54	837.91	416.76	267.95	492.24	724.8	1031.5	1194.46	311.13	896.92	1119.56	486.94
mml-miR-93-3p	-0.576014	10.6853	0.194678	0.634018	1321.99	1970.72	1574.32	721.22	851.75	1721.53	2789.85	2711.95	909.29	1369.48	2398.4	1415.73
mml-miR-6790-3p	-0.53242	4.24147	0.207489	0.662969	15.27	22.1	14.66	8.54	8.92	25.92	24.12	23.8	18.01	17.64	28.18	17.09
mml-miR-29c-3p	0.572754	9.10191	0.209069	0.662969	656.87	441.62	328.93	1003.04	1113.79	409.79	437.73	268.53	445.96	714.7	316.97	453.03
mml-miR-423-5p	-0.48777	12.0596	0.215231	0.673645	3553.77	4983.39	2685.58	2588.9	3011.42	7067.24	4952.75	4376.16	4490.8	4867.9	5343.5	3301.57
mml-let-7b-3p	-0.763618	5.65603	0.220307	0.680693	37.2	63.19	59.12	4.62	6.95	71.88	82.96	57.95	84.1	25.1	76.88	32.41
mml-miR-7	0.631317	11.0451	0.231068	0.680734	2567.91	1657.8	1725.16	4722.3	3806.97	1595.11	1228.36	457.17	1944.99	2888.98	851.39	1908.13
mml-miR-152-3p	0.650233	3.38742	0.231403	0.680734	12.52	7.96	6.11	26.75	14.1	5.88	5.65	2.34	11.94	16.22	5.94	7.49
mml-miR-30a-3p	0.547038	4.67381	0.231627	0.680734	30	20.56	29.8	19.75	25.72	25.76	10.36	14.43	37.09	23.21	13.69	53.02
mml-miR-320b	-0.534452	5.49876	0.233365	0.680734	36.75	53.22	19.79	34.32	58.28	45	50.48	43.15	27.5	80.99	69.83	20.52
mml-miR-423-3p	-0.503872	12.5947	0.234444	0.680734	5116	7254.56	4360.55	2888.37	4704.04	8965.59	7628.58	9962.93	4069.79	7190.31	8127.8	3954.88
mml-miR-190b	0.764831	5.01283	0.237904	0.682557	40.41	23.77	16.25	132.93	30.28	30.85	21.53	9.25	11.3	42.27	7.95	18.32
mml-miR-381-3p	0.568166	5.08551	0.241016	0.68335	40.27	27.16	64	20.59	30.38	17.65	16.83	67.07	35.49	20.01	17.31	47.82
mml-miR-142-3p	0.48767	13.7236	0.249728	0.69982	15792.4	11262.8	11211	6482.41	11091.8	15064.6	9384.69	21854.5	15781.4	8379.46	12274.3	23752
mml-miR-140-5p	0.445962	6.21092	0.255179	0.706874	85.17	62.52	51.79	108.97	118.63	60.74	87.55	62.26	60.43	64.41	48.1	75.56
mml-miR-30e-5p	0.426385	10.4764	0.262072	0.708621	1633.38	1215.44	1153.16	1201.09	1322.32	1110.1	1597.73	2081.43	1444.14	902.01	1314.16	2117.91
mml-let-7a-5p	0.645618	14.9172	0.265804	0.708621	37750	24130.5	16016.2	78896	56667.7	25586.6	14100.5	9044.03	20382.2	55991.8	8957.55	23760.2
mml-miR-339-3p	-0.484563	9.55054	0.265818	0.708621	624.95	874.38	677.66	538.43	409.49	576.6	1335.33	1047.5	780.85	611.33	1170.98	348.49
mml-miR-7204-3p	-0.42715	6.26816	0.269414	0.708621	65.56	88.13	82.94	83.2	47.29	85.23	112.14	81.5	50.84	56.72	103.64	65
mml-miR-652	-0.490975	8.30878	0.270511	0.708621	263.48	370.26	199.22	337.71	433.14	258.88	484.1	265.82	151.35	515.78	393.34	129.38
mml-miR-584-5p	-0.507547	9.42126	0.28062	0.727197	566.06	804.72	469.03	700.77	1179.85	782.21	989.96	308.23	403.75	1104.61	677.81	237.7
mml-miR-382-5p	0.591317	5.75861	0.290483	0.74475	64.83	43.01	62.78	128.16	97.78	25.76	29.3	20.71	47.96	83.12	14.09	29.5
mml-miR-1180-3p	-0.443562	8.82084	0.301654	0.761796	383.05	520.93	218.15	407.88	551.04	690.46	513.51	439.79	281.39	765.97	416.59	235.15
mml-miR-362-5p	0.439939	4.82303	0.30405	0.761796	32.32	23.81	15.51	14.43	35.46	18.61	28.95	55.48	28.14	24.39	31.6	28.09
mml-miR-20a-5p	0.642431	7.10541	0.315279	0.761796	167.6	107.36	84.77	303.39	384.81	72.04	79.19	44.51	28.57	249.36	51.42	76.71
mml-miR-7180-5p	-0.49855	6.78201	0.315377	0.761796	91.03	128.6	79.39	28.43	66.78	111.15	134.62	214.41	52.44	122.43	195.41	93.09
mml-miR-148a-5p	-0.453719	3.29218	0.320884	0.761796	8.06	11.05	11.36	3.08	9.33	7.79	7.18	13.19	5.12	10.89	18.01	9.6
mml-miR-32-5p	0.484971	3.79915	0.322209	0.761796	15.97	11.41	8.92	23.11	26.86	10.5	10.94	7.4	5.76	20.25	6.44	16.73
mml-miR-106b-3p	-0.393703	11.5036	0.333727	0.761796	2509.64	3297.07	1901.42	2096.14	3857.88	2888.56	4398.76	3044.1	1891.38	4181.74	3114.85	1658.71
mml-let-7i-3p	-0.391754	4.65506	0.334745	0.761796	21.61	28.34	17.34	26.75	17.52	28.15	48.36	23.8	23.77	22.97	24.85	16.2
mml-miR-491-5p	-0.417348	7.67315	0.334964	0.761796	174.59	233.16	160.74	88.94	144.03	235.03	284.29	354.59	155.94	188.98	296.74	129.46
mml-miR-376c-3p	0.459343	3.12107	0.33568	0.761796	9.81	7.11	10.14	4.48	11.92	2.39	7.18	15.41	11.94	8.41	7.45	5.28
mml-miR-92a-3p	-0.359983	16.8734	0.338837	0.761796	105158	134961	90811.4	93034.6	111858	167814	125784	141665	81023.5	156603	133792	98208.1
mml-miR-361-5p	0.369516	11.4646	0.34253	0.761796	3185.8	2465.96	2520.57	1873.01	2755.19	3108.32	1567.37	4295.15	3521.93	2483.56	2649.96	3483.7
mml-miR-424-5p	0.503546	6.21425	0.342992	0.761796	86.82	61.21	41.28	144.69	150.05	33.39	82.02	56.22	69.6	73.29	76.07	13.56
mml-miR-19a-3p	0.36299	7.35037	0.343463	0.761796	183.34	142.56	115.55	224.95	210.09	136.91	168.27	112.57	143.04	169.2	122.86	226.08
mml-miR-106a-5p	0.544946	6.10208	0.344547	0.761796	81.27	55.69	52.16	183.21	136.05	49.3	33.07	22.07	28.46	110	33.91	36.55
mml-miR-199a-5p	0.452912	3.62735	0.355087	0.767455	13.98	10.24	7.21	5.6	4.77	10.97	12.12	13.07	18.65	11.72	9.16	27.83
mml-miR-17-3p	-0.435743	3.05919	0.35935	0.767455	6.9	9.31	4.52	7.56	10.58	5.09	15.89	8.63	4.48	10.06	10.97	3.26
mml-miR-191-3p	-0.37395	6.43006	0.360078	0.767455	74.91	97.11	111.15	57.85	56.83	153.13	99.67	91.11	93.37	49.26	72.35	75.39
mml-miR-187-5p	-0.497839	5.67011	0.365696	0.767455	42.05	59.37	107.49	56.45	9.23	75.22	16.83	50.06	72.48	41.56	55.75	22.02
mml-miR-503-5p	0.454776	7.11154	0.367915	0.767455	159.66	116.47	69.26	253.53	256.85	89.53	105.2	114.66	140.59	206.26	112.1	32.67
mml-miR-148b-3p	0.350291	9.39962	0.371815	0.767455	756.75	593.6	453.52	675.83	659.5	522.53	477.27	618.68	1232.78	708.66	806.01	596.94
mml-miR-28-3p	0.357458	7.62423	0.371994	0.767455	221.34	172.79	192.74	172.99	139.37	237.73	122.26	190.24	353.12	145.28	165.93	251
mml-miR-130a-3p	0.470623	3.89427	0.372582	0.767455	17.04	12.27	13.07	39.5	22.5	12.09	6.59	6.29	7.99	21.08	8.55	8.9
mml-miR-181a-5p	-0.430322	7.17832	0.379514	0.772764	123.21	166.01	71.09	167.24	230.62	130.55	238.05	79.77	100.3	194.66	195.72	38.13
mml-miR-25	0.323932	16.0293	0.381572	0.772764	74359.1	59404.7	57634	103227	59294.3	65078.4	51406	73946.1	66822.5	73997.3	48907.6	68505.5
mml-miR-19b	0.338292	12.3967	0.396192	0.782068	6021.3	4762.71	4365.31	3837.34	3947.27	4406.55	5124.79	6647.09	7858.51	3201.1	6715.82	7816.32
mml-miR-199a	0.412801	3.93867	0.398906	0.782068	17.22	12.96	10.87	7	5.08	16.06	13.06	17.88	25.15	14.45	10.36	31
mml-miR-181a-3p	-0.350248	3.92057	0.407355	0.782068	13.11	16.71	17.59	7.84	10.27	14.79	18	14.67	21.21	9.12	24.05	11.54
mml-miR-323b-3p	-0.346752	6.26481	0.409229	0.782068	67.49	85.84	156.22	60.23	37.23	66.95	75.07	70.65	89.21	78.03	52.93	80.14
mml-miR-331-3p	-0.339602	11.476	0.409876	0.782068	2514.62	3182.05	2392.19	2044.87	1459.1	4948.64	3445.16	3199.08	2674.68	1748.38	3375.87	3195.36
mml-miR-296-3p	-0.383601	3.96946	0.411534	0.782068	13.38	17.51	16.73	4.62	14.41	31.8	12.59	11.84	23.88	10.42	16	12.15
mml-miR-15b-3p	-0.398402	11.3256	0.412675	0.782068	2214.2	2918.43	2782.2	1011.86	887.63	2461.76	5349.3	3521	2570.76	1300.21	2698.67	3079.73
mml-miR-7180-3p	-0.325317	4.43281	0.421074	0.782068	18.97	23.77	10.63	13.17	19.6	24.81	27.06	23.18	22.06	29.48	26.87	16.82
mml-miR-30c-1-3p	-0.330094	5.07407	0.422131	0.782068	29.66	37.27	24.55	37.54	23.85	40.71	60.25	27.12	40.93	28.65	32.2	18.85
mml-miR-17-5p	0.439445	8.45909	0.423277	0.782068	404.86	298.54	321.85	873.33	676.61	264.76	210.87	124.53	170.01	531.29	163.92	179.84
mml-miR-221-5p	0.329329	3.20806	0.426209	0.782068	10.03	7.97	8.43	8.26	17.32	5.72	8.94	9.37	6.4	8.53	8.25	8.81
mml-miR-106b-5p	0.480778	6.51007	0.426506	0.782068	105.94	75.9	66.57	209.4	223.98	53.27	50.83	30.7	26.43	159.02	49.81	39.19
mml-miR-576-5p	-0.352857	5.71561	0.431727	0.782068	45.93	58.7	46.17	18.91	28.41	78.08	65.31	49.93	43.17	36.94	67.02	89.22
mml-let-7d	0.420623	11.6544	0.442829	0.782068	3689.78	2756.63	1764.5	6455.1	6471.63	2621.57	1416.16	1335.14	2081.63	6557.19	1423.75	2105.41
mml-miR-154-5p	0.3603	5.35009	0.443838	0.782068	45.59	35.51	74.14	22.97	28.52	24.01	20.47	72.13	52.55	36.71	22.24	51.79
mml-miR-103-3p	0.349709	12.7451	0.444304	0.782068	7692.95	6036.97	4803.08	11725.6	13631.9	4363.77	8644.31	3459.35	5080.12	7742.91	4630.77	4567.76
mml-miR-330-5p	-0.318862	3.14194	0.446942	0.782068	7.64	9.54	6.6	4.62	4.87	7.63	10.36	10.97	7.35	11.13	11.97	10.39
mml-miR-93-5p	0.423627	15.2695	0.449172	0.782068	45254.2	33739.2	36666	103350	63038.7	32044.7	20404.2	12049.8	21343.7	65589.8	13991.1	26488.9
mml-let-7e-5p	0.414253	4.86224	0.450953	0.782068	32.98	24.74	19.05	59.95	54.23	23.53	13.53	9.25	22.38	56.12	11.47	19.11
mml-miR-185-5p	0.276661	11.7537	0.45383	0.782068	3782.94	3122.81	1985.33	4240.46	4358.11	3476.93	3096.03	3349	3393.6	3339.28	3716.49	3573.54
mml-miR-130b-3p	0.374645	5.16285	0.460957	0.782068	40.22	31	28.46	90.91	43.34	25.76	17.65	16.27	24.41	62.28	20.83	26.16
mml-miR-500b-5p	0.321141	3.78304	0.463705	0.782068	15.05	12.02	11.12	10.65	18.04	9.22	12.12	29.1	8.21	12.55	15.09	9.25
mml-miR-18b	0.349006	4.62458	0.467218	0.782068	27.39	21.49	15.76	42.72	51.43	17.81	22.36	15.17	10.55	34.22	17.31	17.09
mml-miR-144	-0.301549	6.55834	0.467336	0.782068	84.23	103.82	74.75	107.29	138.33	143.91	109.9	44.51	61.07	102.3	88.25	69.93
mml-miR-370-3p	0.337521	4.98107	0.469343	0.782068	35.02	27.71	39.09	63.17	33.18	31.8	19.65	16.15	42.53	35.64	12.38	20.08
mml-miR-369-5p	0.341154	3.78582	0.471103	0.782068	15.15	11.96	21.62	15.55	20.53	7.79	4.94	8.63	17.05	18.71	6.74	14
mml-miR-192-5p	0.331092	9.09377	0.473784	0.782068	608.53	483.75	417	229.01	264.42	571.19	507.28	871.06	771.47	284.53	638.77	906.68
mml-miR-335-5p	0.342509	4.17592	0.481418	0.78299	19.94	15.72	10.14	8.68	18.46	15.9	9.18	15.04	37.94	10.06	33.31	19.55
mml-miR-487b-3p	0.313193	3.47143	0.482438	0.78299	12.03	9.68	21.38	10.93	12.86	6.84	6.47	11.59	13.96	8.41	5.33	10.83
mml-miR-181b-5p	-0.352543	5.89942	0.484089	0.78299	52.24	66.68	27.24	70.74	101.83	47.07	88.49	34.65	36.56	107.63	62.99	17.44
mml-miR-485-3p	-0.297024	8.36725	0.489398	0.7863	296.13	363.85	542.44	289.1	152.02	417.58	293.59	276.05	458.32	404.24	161.4	305.16
mml-miR-27a-3p	0.255384	6.29418	0.494353	0.786858	85.15	71.34	73.65	59.11	82.02	74.26	73.19	91.36	115.65	55.18	80.4	77.59
mml-miR-1249	-0.457736	7.18977	0.49992	0.786858	122.85	168.7	104.56	24.79	30.59	169.2	238.05	466.79	59.58	125.75	205.98	32.5
mml-miR-337-3p	-0.329148	2.80375	0.501707	0.786858	5.97	7.53	16.98	3.08	4.15	5.72	5.18	6.53	6.93	6.04	3.72	9.16
mml-miR-425	-0.277338	14.3638	0.502806	0.786858	19062.3	23102.7	17715.1	11872.4	16632.6	17335.5	27407.9	34390.3	12619.6	21848.9	31206.2	19796.8
mml-miR-26b-3p	-0.255581	5.94286	0.513102	0.797791	55.87	66.73	74.75	52.67	41.48	105.91	46.36	65.84	58.41	49.97	56.65	60.94
mml-miR-1271-5p	-0.310483	7.13364	0.524502	0.802813	125.17	155.22	201.42	64.99	160.83	112.27	229.46	276.05	59.79	120.06	112.9	64.2
mml-miR-942-5p	-0.235146	11.105	0.527699	0.802813	2023.27	2381.44	1692.55	1867.4	1818.51	2582.13	2322.7	2707.64	1500.95	2721.32	2588.48	2221.83
mml-miR-329-3p	-0.282823	3.00722	0.528467	0.802813	7.05	8.57	16.98	5.46	6.43	6.36	4.82	9.49	8.31	8.17	6.54	5.55
mml-miR-660-5p	0.228349	5.58976	0.534926	0.802813	51.72	44.14	39.94	57.29	62.42	40.39	56.6	42.04	50.95	39.78	43.97	45.88
mml-miR-148a-3p	0.233069	9.7035	0.536099	0.802813	900.71	766.35	807.98	816.88	774.29	674.55	767.21	572.94	1056.59	734.23	847.77	1282.83
mml-miR-24-3p	0.225522	9.82834	0.536319	0.802813	979.81	837.99	768.29	1195.07	1131.11	790.8	905	1020.87	854.29	804.45	921.42	697.69
mml-miR-7186-3p	0.245598	6.08871	0.542232	0.804348	73.59	62.06	86.72	51.55	44.49	47.07	66.6	112.44	91.66	54.47	55.44	67.81
mml-miR-18a-5p	-0.262251	3.72777	0.54402	0.804348	11.85	14.19	9.89	17.51	16.49	11.29	21.53	9	5.86	13.14	15.09	10.39
mml-let-7i-5p	0.383179	13.3714	0.550145	0.80579	11996.1	9197.96	7890.39	30288	17411.4	9516.43	5362.95	1938.41	4715.6	20676.8	2543.2	5627.16
mml-miR-182	0.246607	5.07705	0.555758	0.80579	36.36	30.68	25.53	21.43	58.59	42.14	25.77	25.89	36.88	40.26	19.72	39.02
mml-miR-7205-3p	-0.298564	5.54066	0.557371	0.80579	41.53	51.12	45.32	28.15	21.67	63.77	67.31	53.26	26.01	68.32	10.87	78.56
mml-miR-342-3p	0.268396	10.2181	0.56032	0.80579	1301.37	1080.47	1097.47	806.24	1156.2	1719.62	522.69	1020.62	2681.29	711.97	1350.59	842.48
mml-let-7f-3p	-0.339885	5.19169	0.561712	0.80579	32.04	40.57	50.2	5.46	6.53	38.96	45.42	53.14	41.89	15.16	53.13	53.19
mml-miR-200c-3p	-0.370564	3.80885	0.568864	0.81122	12.02	15.55	9.89	13.17	26.65	9.7	4.59	3.58	7.46	49.73	3.82	9.25
mml-miR-7186-5p	0.243701	5.80574	0.575287	0.815554	60.42	51.01	44.22	82.5	102.76	46.43	51.19	43.28	49.67	71.75	41.46	23.87
mml-miR-107-3p	0.23809	8.15274	0.588589	0.829532	307.78	260.94	203.25	427.91	508.94	169.04	437.5	177.91	254	271.5	223.39	170.15
mml-miR-671-5p	-0.24704	4.79403	0.600935	0.842007	25.16	29.85	12.95	11.49	26.23	16.22	54.13	41.8	20.46	31.02	34.92	25.8
mml-miR-6529-5p	-0.199642	8.14696	0.613019	0.853974	263.65	302.79	209.97	166.96	169.54	294.66	298.77	378.26	297.8	355.34	355.21	305.69
mml-miR-409-5p	0.217833	3.60845	0.627654	0.869337	12.87	11.05	21.62	8.26	11.1	6.04	8.35	18.49	17.69	9.59	9.66	8.81
mml-miR-340-3p	-0.179571	6.70142	0.641261	0.883108	97.38	110.32	125.69	96.51	69.68	156.95	90.84	79.03	125.24	83.12	94.99	116.43
mml-miR-30e-3p	0.177541	8.352	0.650181	0.888026	346.56	306.45	333.58	275.24	221.91	344.75	350.54	336.34	356.53	202.12	301.27	542.78
mml-miR-331-5p	0.185707	5.54923	0.653393	0.888026	49.61	43.6	25.04	73.96	60.56	44.21	64.37	49.32	30.48	45.23	39.14	33.73
mml-miR-543-3p	0.202177	3.08105	0.655887	0.888026	8.81	7.65	10.87	6.58	10.27	4.93	4	11.71	10.13	12.2	6.24	5.37
mml-miR-532-5p	0.155358	7.164	0.694644	0.931427	150.9	135.48	116.77	199.46	117.9	138.35	210.04	136.73	193.03	91.17	121.05	107.36
mml-let-7a-3p	-0.201746	6.55043	0.695671	0.931427	86.95	100.03	124.22	27.87	23.23	103.2	107.79	108.62	122.68	47.6	117.33	152.36
mml-miR-210-3p	-0.177579	9.38803	0.713038	0.949404	628.63	710.95	589.96	1226.17	833.3	641.16	714.73	360.02	432.95	1280.56	328.34	290.72
mml-miR-1296-5p	-0.168225	7.04976	0.722252	0.956388	124.56	140	124.1	51.83	103.49	291.16	86.72	220.82	138.24	80.4	117.63	108.41
mml-miR-138-3p	-0.154534	3.17419	0.729365	0.96053	8.33	9.29	8.18	8.54	4.67	14.63	10.12	7.4	14.07	5.57	7.95	6.96
mml-miR-502-3p	-0.137428	4.89015	0.734574	0.962132	28.03	30.81	23.45	19.89	31.73	24.65	36.6	41.3	29.52	27	42.36	17.7
mml-miR-378d	0.142843	4.57251	0.751625	0.962794	24.74	22.38	16	32.08	44.07	13.83	34.24	20.47	11.94	27.11	20.73	15.15
mml-miR-23a-3p	0.117279	11.3434	0.754971	0.962794	2703.68	2492.6	3135.69	1897.1	2354.4	2627.45	1829.78	3494.37	2836.8	2100.16	2769.91	2935.73
mml-miR-299-5p	-0.136037	6.45615	0.758382	0.962794	83.44	91.7	190.79	48.18	68.54	59.47	78.02	103.44	115.11	73.65	56.55	81.91
mml-miR-134-5p	0.128728	5.06109	0.776255	0.962794	34.65	31.68	51.91	57.85	36.29	25.6	24.24	23.06	34.21	43.45	13.18	21.84
mml-miR-324-5p	-0.112752	7.64876	0.781014	0.962794	192.62	208.27	143.4	148.47	99.03	189.87	270.17	231.67	228.41	168.25	269.68	255.49
mml-miR-30b-5p	0.10957	10.5218	0.784631	0.962794	1525.73	1414.16	1940.87	971.52	957	1388.39	1149.76	1801.19	1574.6	1068.73	1523.06	2324.35
mml-miR-500a-5p	0.121471	3.99706	0.789014	0.962794	16.41	15.06	11.73	9.66	20.53	10.81	16	33.41	10.34	17.64	19.12	8.1
mml-miR-22	0.106175	10.5512	0.795131	0.962794	1555.41	1445.03	1518.74	1224.63	2526.33	943.45	1660.45	2057.51	1026.32	1538.09	1564.42	942.26
mml-let-7c-5p	0.140165	7.26456	0.798397	0.962794	161	146.08	69.13	286.44	250.22	137.07	114.02	43.28	127.48	341.36	68.83	97.58
mml-miR-1304	0.125037	5.78929	0.801253	0.962794	57.47	52.7	54.96	108.27	84.3	65.67	56.25	15.66	24.51	56.12	30.49	54.6
mml-miR-191-5p	-0.0931061	16.5557	0.803889	0.962794	93222.8	99437.4	103460	90302.1	62390.1	128039	91848.8	91638.6	120324	73026.9	100813	101459
mml-miR-4766-3p	0.112892	4.65029	0.805954	0.962794	25.84	23.89	22.11	9.94	14.1	18.61	24.36	44.88	22.6	19.18	35.22	37.69
mml-miR-185-3p	-0.104543	3.99985	0.806703	0.962794	15.2	16.36	7.21	14.43	20.64	26.87	14	15.9	13.22	16.81	16.91	11.8
mml-miR-125b-5p	-0.114004	9.20167	0.807512	0.962794	565.33	611.83	397.34	557.62	299.99	539.87	531.52	288.63	1059.36	1197.08	393.34	621.07
mml-miR-99b-5p	0.106304	5.86599	0.81441	0.962794	60.22	55.95	70.11	47.34	26.65	46.43	60.36	33.91	124.07	39.43	63.39	69.14
mml-miR-223	0.085367	15.0793	0.81571	0.962794	35644.5	33596.5	37215.8	39636.8	25183.8	38079.4	27997.7	32480.4	44690.7	32925.3	31764.3	36230.6
mml-miR-505-3p	0.0938562	5.92301	0.815845	0.962794	62.42	58.49	77.07	82.08	48.32	77.44	41.89	60.04	81.86	40.49	55.55	39.81
mml-miR-503-3p	0.100211	5.71404	0.816016	0.962794	54.1	50.44	32.98	76.62	63.88	44.84	49.77	58.69	51.59	79.33	45.28	19.73
mml-miR-128b-3p	0.088675	11.6718	0.825003	0.962794	3362.53	3162.08	3727.47	2333.14	1673.44	3302.33	3125.8	4592.78	4117.86	2289.61	3365.21	4095.44
mml-miR-186-5p	0.085725	11.5852	0.832003	0.962794	3163.59	2981.08	3001.82	1837.43	1962.12	2554.31	3206.4	4903.11	3261.44	2253.02	3889.87	3853.86
mml-miR-340-5p	0.0858145	7.34017	0.832389	0.962794	166.62	157	114.08	191.47	206.15	197.18	154.74	90.37	242.06	156.3	162.71	103.04
mml-miR-3122	0.0800652	3.79542	0.833849	0.962794	14.05	13.27	11.73	16.95	14.31	13.68	12.36	16.27	12.04	14.92	13.69	10.66
mml-miR-222-3p	-0.0973851	8.12547	0.834327	0.962794	269.64	288.43	144.86	461.53	375.9	170.47	452.91	223.78	148.9	349.89	324.01	138.09
mml-miR-451	-0.0828526	15.3916	0.835707	0.962794	41753.8	44221.9	40520.8	24248	54489.4	31088.8	37991.5	51158.3	39397.3	39707.9	71800.4	39476.1
mml-miR-138-5p	0.0988743	3.16442	0.840481	0.962794	9.05	8.43	7.94	13.73	16.9	6.2	13.06	5.18	4.58	9.83	5.13	4.84
mml-miR-29b-2-5p	0.0890269	4.41924	0.842986	0.962794	21.83	20.51	14.17	37.26	29.55	16.7	24.95	11.59	14.39	31.73	14.99	16.38
mml-miR-128a-3p	0.0747883	11.8789	0.851836	0.962794	3863.6	3668.42	4369.59	2697.6	1968.14	4030.63	3534.7	5164.74	4952.86	2597.82	3809.37	4534.65
mml-miR-1255a-3p	0.0861628	3.07188	0.855712	0.962794	8.4	7.93	6.72	4.9	4.36	7.16	9.06	7.64	10.66	9.59	7.14	14.44
mml-miR-23b-3p	-0.067145	9.87866	0.858399	0.962794	919.27	963.07	1088.06	673.73	690.51	974.14	891.82	1256.97	1074.71	744.06	1117.24	900.43
mml-miR-150-5p	-0.0700412	14.4919	0.861072	0.962794	22481.6	23600	24152.2	20819.5	18330.7	36520.9	18200.5	17619.5	37394.8	17669	21457.5	18243.5
mml-miR-99a-5p	-0.08166	5.05847	0.863092	0.962794	32.15	34.02	16.61	19.19	30.07	22.1	22.36	28.73	54.04	74	35.02	28.71
mml-miR-151-3p	0.0686502	10.2982	0.871662	0.962794	1288.84	1228.99	1312.2	766.74	765.17	2022.39	1151.17	1690.47	1366.44	854.89	804.3	1855.37
mml-miR-409-3p	0.0679838	9.66502	0.873368	0.962794	830.71	792.48	1501.27	701.19	501.06	672.8	619.3	786.49	1253.46	706.65	462.37	911.35
mml-miR-582-3p	0.118508	2.77675	0.882282	0.962794	6.87	6.34	13.07	1.54	2.8	7.63	0.24	8.14	1.6	2.72	8.05	20.26
mml-miR-365-3p	-0.0691654	3.63324	0.888767	0.962794	11.89	12.45	10.99	9.1	9.13	8.27	5.65	14.18	18.76	13.38	23.95	8.28
mml-miR-151-5p	-0.0507124	6.45713	0.890794	0.962794	86.09	89.19	85.99	82.78	68.65	112.58	103.55	91.73	93.48	73.77	70.04	93.79
mml-miR-211	-0.0693404	2.55188	0.902712	0.962794	5.48	5.76	2.81	5.04	1.56	4.77	10	6.04	2.45	3.67	7.55	12.33
mml-miR-323a-3p	-0.0516459	5.11636	0.903339	0.962794	33.83	35.08	61.68	27.03	25.3	33.55	19.65	35.26	44.23	39.9	20.63	37.34
mml-miR-3200-3p	-0.0455878	7.47841	0.907685	0.962794	175.28	180.92	150.36	130.12	127.03	242.82	187.45	237.59	193.03	109.76	214.23	188.65
mml-miR-30c-5p	0.0432882	13.4251	0.911239	0.962794	11163.8	10833.8	12999.4	8138.17	6634.64	11570.8	9047.57	13487.5	13000.3	8312.2	12238.8	14558.1
mml-miR-424-3p	0.0554588	5.06101	0.915107	0.962794	33.8	32.5	14.41	45.66	55.06	21.94	41.18	28.36	34.21	49.26	35.72	5.72
mml-miR-431	-0.0488928	4.43739	0.915258	0.962794	21.08	21.79	34.57	21.01	32.77	13.2	17.06	22.81	19.4	29.25	14.89	9.42
mml-miR-26a-2-3p	0.0526156	3.55117	0.915312	0.962794	11.68	11.31	12.95	8.82	6.74	17.65	10.71	9.62	11.19	8.29	6.94	22.02
mml-miR-187-3p	-0.0409378	9.67209	0.920213	0.962794	804.02	827.15	1139.85	1123.36	437.91	695.86	547.64	599.2	954.8	1078.32	674.09	904.83
mml-miR-125a-5p	-0.0398442	8.67659	0.924138	0.962794	403.29	414.61	444.36	368.24	207.91	508.38	435.5	247.08	729.37	336.75	348.06	463.87
mml-miR-20a-3p	-0.0498022	2.6273	0.929824	0.962794	5.84	6.04	3.91	5.18	12.03	3.5	12.36	4.93	1.6	5.21	5.23	5.46
mml-miR-196a-5p	-0.0545273	7.86089	0.930274	0.962794	227.87	236.65	291.92	397.8	428.26	323.44	173.56	39.21	141.87	365.64	28.68	132.19
mml-miR-654-3p	0.0440654	7.91884	0.930455	0.962794	245.45	238.07	586.29	100.57	163.84	159.18	151.44	362.23	306.97	167.07	126.39	293.63
mml-miR-494-3p	-0.0393967	5.50859	0.930834	0.962794	44.67	45.91	103.09	35.72	36.4	25.6	32.48	48.08	61.07	37.18	31.19	42.1
mml-miR-378a	0.0337112	7.24139	0.941911	0.970088	152.85	149.31	87.46	136.99	319.17	91.59	233.58	120.83	81.11	195.84	138.06	106.12
mml-miR-10a-5p	-0.025073	5.94338	0.951106	0.975389	60.75	61.85	80.98	28.99	58.07	72.51	38.71	68.06	62.25	53.05	64	86.4
mml-miR-30d-5p	0.0210227	13.0214	0.956785	0.977055	8374.56	8253.42	8661	5070.93	5828.1	9452.98	8007.13	10927.8	10421.3	6032.89	9113.12	9624.66
mml-miR-29c-5p	0.0158393	6.06229	0.970324	0.986701	66.96	66.23	54.23	35.72	46.14	72.83	72.25	116.39	62.46	52.34	79.49	74.07
mml-miR-500a-3p	-0.0112986	4.71866	0.978718	0.98927	26	26.21	24.55	23.39	28.21	28.15	32.59	24.66	35.07	19.77	25.96	18.67
mml-miR-221-3p	0.0119618	11.7944	0.982719	0.98927	3566.49	3537.01	1897.39	6733.69	6777.12	1975.48	5631.71	1708.47	1502.23	5418.01	2762.46	1110.92
mml-miR-432-5p	-0.00906948	5.13434	0.98662	0.98927	34.8	35.01	36.89	57.15	47.29	36.1	27.65	15.29	32.51	62.76	11.67	21.75
mml-miR-140-3p	0.00534537	13.1849	0.98927	0.98927	9328.95	9294.45	10247.8	6561.13	5309.31	9436.28	9492.72	12605.6	11848.1	6010.28	11285.2	10320.6

## Sheet: D. PairedDE_miRNA_Grp3_Grp1
PairedDE_miRNA_Group3_vs_Group1_1
names	logFC	logCPM	PValue	FDR	Group3	Group1	Group3:6	Group3:8	Group3:14	Group3:14	Group3:25	Group1:2	Group1:10	Group1:18	Group1:20	Group1:30
mml-miR-1262-3p	-0.86914	3.4486	0.00775333	0.99116	6.07	11.81	5.36	3.56	3.18	4.17	14.1	7.23	10.52	3.17	13.1	25.01
mml-miR-16-2-3p	0.895104	7.14243	0.00859117	0.99116	144.33	100.48	91.87	214.22	116.78	194.35	104.44	70.64	41.88	273.05	43.46	73.38
mml-miR-877-3p	0.541208	3.8967	0.0260582	0.99116	14.3	10.3	9.25	12.32	12.91	14.16	22.87	5.97	8.52	15.85	8.86	12.3
mml-miR-323b-3p	0.496473	6.46785	0.0349462	0.99116	87.94	65.84	110.69	98.66	64.53	132.48	33.33	129.33	50.4	40.99	74.97	33.51
mml-miR-1262-5p	-0.722321	2.02768	0.0372649	0.99116	2.56	3.97	4.71	1.02	0.82	0.83	5.41	3.25	2.61	1.86	2.22	9.94
mml-miR-29a-3p	-0.448908	7.36237	0.0372922	0.99116	123.59	161.05	192.82	176.76	58.8	54.37	135.2	218.83	165.52	91.16	131.33	198.42
mml-miR-222-3p	0.45907	7.97068	0.0431631	0.99116	249.31	178.43	118.48	264.88	227.81	427.65	207.72	169.26	118.63	244.85	188.47	170.96
mml-miR-28-5p	-0.74937	1.16735	0.0437023	0.99116	1.33	2.12	2.11	1.52	0.31	0.83	1.86	2.1	1.9	2.08	1.64	2.87
mml-miR-329-3p	0.584786	3.21466	0.0471307	0.99116	8.78	7.09	11.36	11.43	4.81	9.37	6.92	17.19	4.31	2.4	7.13	4.41
mml-miR-335-5p	-0.695343	4.06066	0.0485937	0.99116	11.52	16.49	16.88	9.78	4.4	3.65	22.87	11	15.53	11.59	15.13	29.21
mml-miR-127-3p	0.580925	2.16058	0.0510074	0.99116	4.47	3.02	5.68	5.08	1.64	8.02	1.95	6.29	1.8	2.19	3.28	1.54
mml-miR-874-3p	-0.829818	0.476715	0.0560904	0.99116	0.65	1.27	0.65	0.63	0.72	0.62	0.62	1.36	2	1.31	1.06	0.61
mml-miR-337-3p	0.445271	3.2115	0.0593341	0.99116	9.08	6.94	18.02	7.62	5.22	10.73	3.81	14.88	3.21	5.47	7.13	4
mml-miR-485-5p	-0.636418	1.40813	0.070576	0.99116	1.59	2.6	3.08	1.4	1.02	1.56	0.89	5.14	2.61	0.77	2.22	2.25
mml-miR-664	0.431059	3.49926	0.0718015	0.99116	10.5	8.25	6.33	14.48	11.58	9.58	10.55	6.81	6.31	14.1	7.03	6.97
mml-miR-409-5p	0.479298	3.55592	0.0727024	0.99116	11.27	9.19	18.67	13.08	5.22	12.39	7	22.53	4.01	5.68	7.9	5.84
mml-miR-542-3p	-0.784609	0.745224	0.0750171	0.99116	0.94	1.48	1.14	0.25	0.31	2.29	0.71	1.78	1.6	0.98	2.12	0.92
mml-miR-500b-3p	-0.719221	0.642316	0.078826	0.99116	0.83	1.38	0.65	1.27	1.13	0.21	0.89	0.94	1.7	1.42	0.87	1.95
mml-miR-22	0.40438	10.4335	0.0831511	0.99116	1315.02	1072.13	1592.87	1545.86	1054.67	1256.27	1125.41	1686.05	830.4	1278.35	846.88	718.98
mml-miR-7180-5p	0.324317	6.9847	0.0840792	0.99116	115.93	96.62	62.33	118.73	111.24	78.22	209.14	64.35	65.93	144.61	57.24	150.97
mml-miR-211	0.446557	2.78934	0.0868691	0.99116	6.33	5.04	3.73	8.25	7.38	8.02	4.26	3.88	3.01	10.06	3.95	4.3
mml-miR-338-3p	-0.506043	4.23881	0.0973416	0.99116	13.9	18.54	29.54	13.33	5.33	6.87	14.45	24.94	15.13	7.98	19.85	24.8
mml-miR-30d-3p	-0.39228	3.1392	0.0994129	0.99116	6.48	8.42	9.74	5.21	3.48	9.17	4.79	12.05	6.91	7.65	7.71	7.79
mml-miR-26a-2-3p	-0.426267	3.81109	0.100838	0.99116	9.91	13.98	15.26	9.9	7.48	9.27	7.62	13.21	12.02	23.17	11.76	9.74
mml-miR-138-5p	0.485764	2.5343	0.105213	0.99116	5.73	4.06	5.36	10.67	2.97	7.19	2.48	7.55	2.91	3.94	3.76	2.15
mml-miR-493-5p	0.464141	2.47233	0.11482	0.99116	5.41	4	8.44	4.57	1.74	10.42	1.86	9.01	3.91	0.87	4.24	1.95
mml-miR-1271-5p	0.27916	7.43789	0.115546	0.99116	153.63	137.06	164.25	129.27	252.3	120.82	101.51	170.93	85.26	245.51	94.43	89.17
mml-let-7b-5p	-0.35163	12	0.119127	0.99116	3134.08	3912	3001.85	3011.97	1625.23	5306.19	2725.13	3178.22	4250.27	3314.65	4726.21	4090.65
mml-miR-484	0.334866	13.8759	0.121275	0.99116	14074	11477.6	6114.89	21871.3	11401.3	11585.6	19397.1	7727.47	11767.8	18366.9	5560.76	13965
mml-miR-331-5p	0.412956	5.33117	0.121673	0.99116	38.24	29.42	30.51	34.28	40.05	53.12	33.25	27.56	25.85	30.28	27.65	35.77
mml-miR-491-5p	0.297525	7.74647	0.125635	0.99116	197.59	165.48	123.68	228.18	183.97	188.72	263.4	157.62	157.6	209.87	113.32	188.99
mml-miR-299-3p	0.452053	2.02427	0.126139	0.99116	3.81	3.06	7.95	2.67	1.74	5.62	1.06	8.49	1.4	1.42	2.99	1.02
mml-miR-93-3p	0.384821	11.0223	0.130646	0.99116	1928.47	1581.74	982.93	2528.43	2362.55	1760.99	2007.46	1382.97	1212.43	2931.74	940.73	1440.83
mml-miR-487b-3p	0.389876	3.57546	0.132265	0.99116	10.92	9.57	17.53	9.9	7.89	13.33	5.94	22.43	5.21	5.14	9.54	5.53
mml-miR-18a-3p	0.34134	9.58336	0.136634	0.99116	704.6	584.06	348.31	714.52	670.84	468.16	1321.16	354.13	449.56	992.73	288.97	834.9
mml-miR-26a-1-3p	0.419594	2.98693	0.141865	0.99116	7.46	5.43	8.44	6.6	12.91	5.62	3.72	7.02	4.41	5.79	5.01	4.92
mml-miR-15b-3p	0.330438	11.6782	0.141996	0.99116	3020.51	2529.75	3557.27	2908.99	3632.84	2576.81	2426.63	3118.28	1959.27	3045.86	1734.91	2790.44
mml-miR-330-5p	0.351419	3.63285	0.142271	0.99116	11.16	9.19	6.65	10.41	15.26	12.39	11.08	7.13	6.51	13.01	7.52	11.79
mml-miR-148b-3p	-0.366815	9.13828	0.144076	0.99116	417.72	548.47	610.27	444.43	285.59	300.79	447.54	468.57	453.97	454.83	627.86	737.12
mml-miR-204-5p	0.3864	4.82919	0.14658	0.99116	24.97	23.11	38.63	19.94	40.87	11.87	13.56	39.93	9.82	45.91	6.36	13.53
mml-miR-654-3p	0.287064	8.18671	0.157738	0.99116	270.38	244.86	552.65	256.63	159.59	255.17	127.84	590.35	114.62	183.2	211.5	124.63
mml-miR-494-3p	0.40816	5.68182	0.160201	0.99116	48.29	40.66	71.58	55.36	41.59	52.8	20.13	85.83	22.64	24.16	48.76	21.93
mml-miR-299-5p	0.275132	6.66714	0.160917	0.99116	93.11	84.61	162.63	93.84	65.66	88.01	55.41	179.11	51.2	78.81	68.03	45.92
mml-miR-29c-3p	-0.321005	8.52422	0.166245	0.99116	299.47	346.76	485.94	339.04	92.91	420.88	158.61	424.45	252.99	275.67	548.66	232.04
mml-miR-758-3p	0.455091	1.41981	0.167553	0.99116	2.45	1.93	4.71	3.05	1.23	2.29	0.98	4.61	1.2	1.86	1.35	0.61
mml-miR-191-3p	0.291245	6.53785	0.171785	0.99116	85.62	73.46	101.6	121.01	65.46	76.45	63.57	99.04	96.29	55.64	45.19	71.13
mml-miR-7195-3p	0.515714	0.853156	0.173349	0.99116	1.42	1.18	0.81	0.63	2.66	1.46	1.51	0.52	0.5	3.17	0.77	0.92
mml-miR-449a-5p	0.554845	0.915971	0.17721	0.99116	1.69	1.13	0.49	3.81	0.82	2.81	0.53	1.05	2.4	0.55	1.54	0.1
mml-miR-7180-3p	0.350592	4.62237	0.185866	0.99116	23.48	18.17	15.09	25.4	16.29	40.41	20.21	15.2	17.63	14.32	21.58	22.14
mml-miR-409-3p	0.332023	9.79599	0.193258	0.99116	840.83	699.3	1263.07	806.2	705.36	1102.44	327.05	1336.54	552.96	424.88	790.61	391.52
mml-miR-6827-3p	0.327671	4.43116	0.195214	0.99116	19.72	16.68	19.8	18.67	21.2	23.95	14.98	20.54	13.33	23.5	12.62	13.43
mml-miR-4446-3p	-0.493308	1.16885	0.197072	0.99116	1.33	2.02	1.14	1.78	1.02	1.67	1.06	1.47	3.81	0.77	2.12	1.95
mml-miR-200a-3p	0.598111	0.49134	0.198311	0.99116	1.19	0.75	0.81	0.38	0.61	2.92	1.24	0.73	0.7	0.66	1.35	0.31
mml-miR-320a	-0.289701	11.3512	0.200293	0.99116	1994.51	2422.99	1204.31	2106.48	1099.23	1606.12	3956.4	1489.66	2932.64	1894.52	1736.16	4061.95
mml-miR-134-5p	0.38142	5.08325	0.2004	0.99116	33.51	25.64	38.95	37.33	15.37	63.74	12.15	48.1	20.84	10.38	32.47	16.4
mml-miR-7189-3p	-0.495066	0.743659	0.201921	0.99116	1.04	1.47	2.11	1.27	0.72	0.31	0.8	2.62	1.2	0.98	0.67	1.84
mml-miR-502-5p	0.403141	1.47817	0.203209	0.99116	2.43	1.95	2.6	2.92	1.54	2.19	2.93	2.41	1.4	2.62	1.06	2.25
mml-miR-301a-5p	0.473881	0.737365	0.204136	0.99116	1.43	1.05	2.43	1.27	0.92	1.04	1.51	1.26	0.6	0.98	0.87	1.54
mml-miR-340-5p	-0.296047	6.79287	0.2069	0.99116	93.2	101.84	151.43	143.61	25.2	91.34	54.44	149.87	106.2	89.2	84.79	79.12
mml-miR-7	-0.289809	10.4946	0.208298	0.99116	1160.35	1360.99	1878.53	1052.41	412.3	1904.93	553.57	1868.93	1261.33	662.51	2183.74	828.44
mml-miR-29b-2-5p	0.332709	4.17014	0.209553	0.99116	17.22	13.28	11.69	16.89	11.58	36.45	9.49	14.88	12.32	8.42	21.78	9.02
mml-miR-1260b	0.299782	5.77446	0.211445	0.99116	49.65	42.06	35.38	54.86	47.63	38.74	71.63	31.13	46.59	56.95	27.65	47.97
mml-miR-376c-5p	-0.495954	1.47381	0.211849	0.99116	2.06	2.49	5.36	2.41	0.31	1.15	1.06	4.4	1.7	1.86	3.37	1.13
mml-miR-374b-5p	0.248826	6.83013	0.212747	0.99116	102.43	92.97	129.03	102.85	92.09	119.36	68.8	152.07	77.95	82.2	100.98	51.66
mml-miR-433-3p	0.525398	0.343362	0.228447	0.99116	1.02	0.74	1.14	1.27	0.72	0.73	1.24	1.15	0.6	0.77	0.77	0.41
mml-miR-7204-3p	0.249992	6.32888	0.231079	0.99116	72.36	63.65	63.79	96.89	78.46	56.35	66.32	60.58	59.21	90.4	44.81	63.24
mml-miR-671-5p	0.378231	4.58767	0.231785	0.99116	23.43	17.95	14.61	29.33	12.8	43.64	16.76	14.67	11.22	31.15	18.89	13.84
mml-miR-23b-3p	0.279422	10.0098	0.232323	0.99116	953.38	803.07	968.81	1345.48	936.15	721.14	795.34	1002.95	784.41	788.66	665.44	773.92
mml-miR-605	0.364717	1.37463	0.234827	0.99116	2.19	1.8	1.95	2.67	2.36	1.77	2.22	1.57	2	2.51	1.16	1.74
mml-miR-532-5p	0.253376	7.08952	0.23972	0.99116	126.41	106.84	102.58	166.22	120.77	172.79	69.68	146.51	99.99	114.77	91.54	81.38
mml-miR-760	-0.542582	0.437977	0.245831	0.99116	0.77	1.07	0.81	0.51	0.2	0.62	1.68	1.26	1.2	0.33	1.35	1.23
mml-miR-450b-5p	-0.447801	1.11126	0.249035	0.99116	1.42	1.85	2.11	0.89	0.31	1.04	2.75	1.78	0.9	1.97	1.54	3.07
mml-miR-1249	0.245088	7.15708	0.249592	0.99116	129.47	108.68	96.57	76.44	138.9	93.42	242.03	94.64	86.47	156.75	68.7	136.83
mml-miR-486-3p	0.67984	1.05003	0.253558	0.99116	1.9	1.42	3.9	2.54	0.31	1.15	1.6	1.05	1	3.94	0.39	0.72
mml-miR-660-5p	-0.307082	5.29233	0.258322	0.99116	30.98	37	46.09	41.78	14.24	28.85	23.94	43.6	29.36	36.73	37.48	37.82
mml-miR-6529-5p	-0.263293	7.9774	0.258519	0.99116	188.74	231.41	137.47	182.85	223.51	115.3	284.59	140.12	245.97	224.19	219.21	327.56
mml-miR-499-5p	0.435168	1.2505	0.259043	0.99116	2.14	1.57	1.79	2.79	0.92	3.96	1.24	1.78	1.8	2.3	1.35	0.61
mml-miR-584-5p	0.292281	9.36808	0.261755	0.99116	650.43	488.1	337.27	885.94	425.21	1215.24	388.49	541.62	553.87	409.36	527.46	408.22
mml-miR-24-3p	0.259187	9.80434	0.261861	0.99116	832.75	713.28	845.13	1046.57	550.79	1065.36	655.88	1013.23	643.34	586.11	644.63	679.11
mml-miR-30c-1-3p	0.303789	5.03715	0.268101	0.99116	30.35	25.09	25.16	36.19	28.78	39.47	22.16	26.72	29.06	24.05	20.72	24.91
mml-miR-130b-5p	0.240157	6.17362	0.270408	0.99116	65.08	57.28	45.93	76.44	52.65	68.11	82.27	44.75	53	73.67	43.55	71.44
mml-miR-371-5p	0.407597	1.3411	0.271942	0.99116	2.11	1.92	3.57	1.14	0.72	3.54	1.6	4.93	0.2	0.66	2.7	1.13
mml-miR-550-5p	-0.481335	0.938616	0.272866	0.99116	1.12	1.62	0.49	0.89	1.64	0.83	1.77	1.47	2.4	1.42	1.35	1.43
mml-miR-543-3p	0.30045	3.07991	0.27498	0.99116	7.72	6.55	12.66	9.02	5.84	4.27	6.83	11.84	4.51	3.94	6.74	5.74
mml-miR-142-3p	-0.288186	13.9287	0.2763	0.99116	12509.9	14637.2	23479	11450.2	5857.62	6814.31	14948.4	14347	10968.7	22992.5	9566.41	15311.3
mml-miR-1235	-0.351763	2.68503	0.278153	0.99116	4.23	5.8	0	2.92	5.43	1.98	10.82	0	5.61	4.81	2.51	16.09
mml-miR-5697-3p	0.368193	1.55442	0.27974	0.99116	2.58	2.02	3.41	2.16	3.69	2.4	1.24	2.31	1.3	2.08	2.79	1.64
mml-miR-122a-5p	-0.600139	5.33465	0.280526	0.99116	25.51	42.7	39.77	38.98	7.38	16.25	25.18	10.38	81.76	49.3	57.91	14.14
mml-miR-29b-3p	-0.232382	8.02601	0.28178	0.99116	197.8	246.95	263.75	145.65	179.06	215.59	184.94	209.81	153.29	238.95	378.39	254.28
mml-miR-500a-5p	0.271746	3.99108	0.286008	0.99116	14.22	12.48	10.55	19.3	13.62	10.42	17.2	13.62	9.32	19.02	7.71	12.71
mml-miR-196b-5p	0.255081	3.36208	0.294612	0.99116	9.75	7.84	12.17	8.63	4.2	20	3.72	13	7.31	4.48	10.7	3.69
mml-miR-6529-3p	0.272926	5.20686	0.301714	0.99116	33.26	27.79	23.21	39.87	52.04	24.06	27.13	22.22	25.55	39.9	23.51	27.78
mml-miR-101-3p	-0.255434	8.82604	0.304366	0.99116	389.35	411.62	671.14	478.72	108.27	555.54	133.07	590.77	415.3	393.29	496.82	161.94
mml-miR-296-5p	0.256027	10.4325	0.305233	0.99116	1229.15	1098.9	998.35	1317.29	1414.11	1233.05	1182.95	1183.74	1347.69	1383.07	679.89	900.08
mml-miR-627-5p	-0.312742	6.1169	0.308415	0.99116	50.78	66.2	64.6	52.82	54.5	46.35	35.64	63.82	74.14	36.84	90.38	65.8
mml-let-7f-3p	0.265408	5.46238	0.311325	0.99116	40.74	34.6	60.22	48.63	33.7	19.48	41.67	35	27.85	50.17	19.46	40.48
mml-miR-32-5p	-0.336311	3.62541	0.31535	0.99116	9.51	11.76	16.07	7.62	2.77	12.5	8.6	12.37	6.41	18.15	12.53	9.33
mml-miR-501-5p	0.384085	0.81443	0.315866	0.99116	1.38	1.11	0.81	0.76	1.43	1.25	2.66	1.05	0.6	0.98	0.96	1.95
mml-miR-221-3p	0.305416	11.2095	0.316095	0.99116	2380.96	1752.74	1231.58	3167.65	1217.64	4733.05	1554.86	2355.32	1418.43	1951.8	1722.28	1315.89
mml-miR-378a	0.227788	6.6502	0.319318	0.99116	94.76	78.46	60.7	108.7	61.36	168.73	74.29	91.28	59.21	85.04	84.79	71.95
mml-let-7e-5p	-0.276699	4.61536	0.321321	0.99116	18.21	23.49	21.91	17.65	10.35	30	11.17	26.41	25.75	10.27	40.76	14.25
mml-miR-500b-5p	0.223646	3.72559	0.330151	0.99116	11.62	10.4	9.09	14.09	12.39	10.1	12.41	10.38	8.52	13.66	8.58	10.86
mml-miR-323a-3p	0.267536	5.2864	0.330893	0.99116	35.9	31.39	60.38	35.3	27.15	36.97	19.68	55.96	26.45	17.38	36.04	21.11
mml-miR-92b-3p	0.179213	7.93862	0.340244	0.99116	210.69	197.99	167.34	113.65	306.89	158.73	306.84	162.23	112.92	355.58	117.75	241.47
mml-let-7a-3p	-0.24742	6.82531	0.345843	0.99116	90.91	105.82	171.07	85.33	48.14	47.08	102.93	99.14	81.26	168.88	58.78	121.04
mml-miR-431	0.293732	4.33939	0.347454	0.99116	19.26	16.45	28.4	23.49	4.92	27.7	11.79	40.56	10.52	9.29	10.41	11.48
mml-miR-376a-1-5p	-0.370622	0.815583	0.350876	0.99116	1.2	1.48	2.92	0.63	0.51	1.04	0.89	2.31	0.8	1.64	1.73	0.92
mml-miR-485-3p	0.215134	8.58003	0.351187	0.99116	350.13	304.68	490	267.04	345.82	485.97	161.8	458.19	292.36	248.78	350.74	173.31
mml-miR-29c-5p	0.202928	6.30788	0.352286	0.99116	69.64	63.53	52.59	78.47	83.18	49.99	83.96	56.7	44.08	93.35	50.88	72.67
mml-miR-342-5p	-0.277223	2.01542	0.359107	0.99116	2.9	3.48	1.95	5.08	1.95	1.46	4.08	1.68	5.61	3.06	3.28	3.79
mml-miR-148a-5p	0.250955	3.30033	0.359535	0.99116	8.88	7.61	8.12	10.67	5.12	5	15.51	10.06	4.21	9.73	4.53	9.53
mml-miR-126	0.210878	9.68926	0.359815	0.99116	787.72	666.3	979.84	777.88	279.85	1751.62	149.39	1119.39	587.43	247.8	1213.42	163.47
mml-miR-33b-5p	0.412224	0.9559	0.360971	0.99116	1.76	1.22	1.46	3.56	0.31	1.87	1.6	1.68	1	1.64	0.96	0.82
mml-miR-496	0.371022	0.649975	0.361931	0.99116	1.34	1.04	3.08	1.14	0.61	1.25	0.62	1.89	0.5	0.55	1.73	0.51
mml-miR-424-5p	-0.244223	5.72214	0.364587	0.99116	42.32	49.1	61.35	35.05	18.03	59.68	37.5	45.59	30.56	51.92	66	51.45
mml-miR-486-5p	0.131612	17.4812	0.37524	0.99116	156232	149851	132028	126527	187132	132322	203152	112202	160611	200992	105243	170210
mml-miR-143-3p	0.412776	2.11049	0.376212	0.99116	3.99	2.78	3.41	1.9	2.05	2.92	9.66	1.36	4.11	4.26	2.41	1.74
mml-miR-92a-3p	0.118823	16.945	0.385953	0.99116	108186	103653	84334.6	100511	114740	89911.4	151436	79153.1	106660	120975	77320.2	134155
mml-miR-20b-5p	-0.21494	4.15562	0.386403	0.99116	13.87	16.9	19.48	17.78	5.84	21.66	4.61	28.93	16.73	7.43	26.31	5.12
mml-miR-628-5p	-0.241724	1.82285	0.389267	0.99116	2.57	3.08	3.08	3.17	0.92	2.92	2.75	3.56	3.11	0.87	3.95	3.89
mml-miR-505-5p	-0.246525	2.53058	0.390099	0.99116	4.29	5.03	5.68	2.29	5.02	1.98	6.47	5.45	4.01	4.59	3.95	7.17
mml-miR-146a-5p	-0.167267	7.50627	0.392649	0.99116	143.4	167.11	160.52	190.47	125.99	126.54	113.48	214.32	190.47	126.03	168.72	136.01
mml-miR-100-5p	0.361455	1.03429	0.393055	0.99116	1.63	1.38	1.14	1.65	1.02	0.52	3.81	0.52	1.4	2.62	0.19	2.15
mml-miR-106b-3p	0.195174	11.3886	0.393692	0.99116	2436.2	2145.67	1662.66	2986.83	1887.66	3301.6	2342.22	1971.12	2195.72	2331.43	1823.07	2407.02
mml-miR-598-3p	-0.268643	1.55374	0.396848	0.99116	2.16	2.52	4.06	1.14	1.13	2.5	1.95	3.04	1.7	2.3	2.79	2.77
mml-miR-382-3p	0.282227	1.30092	0.39818	0.99116	2.24	1.74	5.19	2.03	0.72	1.67	1.6	3.25	1.4	1.09	1.73	1.23
mml-miR-542-5p	-0.255151	1.97735	0.399082	0.99116	2.83	3.44	1.95	2.79	1.84	4.9	2.66	3.88	2.91	1.86	3.85	4.71
mml-miR-23a-3p	0.197112	11.5658	0.403291	0.99116	2711.31	2455.57	2969.39	3406.88	2594.97	1796.09	2789.23	3408.06	2214.26	2057.72	1904.11	2693.69
mml-miR-20a-3p	0.240744	2.48422	0.405155	0.99116	5	4.4	5.36	6.6	2.56	8.02	2.48	8.49	3.31	4.48	3.57	2.15
mml-miR-21-5p	-0.186304	8.64301	0.406173	0.99116	332.61	366.95	506.23	320.5	125.99	397.96	312.34	503.26	265.21	372.41	373.58	320.29
mml-miR-668	-0.361401	0.407595	0.411221	0.99116	0.78	1.11	1.46	0.63	0.51	0.94	0.35	2.83	0.9	0.55	0.67	0.61
mml-miR-148b-5p	-0.205176	3.90871	0.413573	0.99116	11.4	13.77	13.31	7.87	9.83	11.98	14.01	14.57	9.02	13.01	19.37	12.91
mml-miR-6505-3p	-0.224411	2.16989	0.418124	0.99116	3.24	3.98	1.62	4.57	3.69	3.02	3.28	3.77	2.91	5.9	2.89	4.41
mml-miR-320b	-0.207803	5.1911	0.419874	0.99116	28.67	32.6	16.56	27.43	15.57	22.81	61	18.65	33.26	29.51	22.74	58.83
mml-miR-374a-5p	-0.208468	6.09558	0.420995	0.99116	57.27	62.47	121.24	52.44	21.92	56.45	34.31	93.48	54.71	58.81	75.83	29.52
mml-miR-150-3p	0.251641	1.76339	0.424166	0.99116	2.88	2.48	1.62	4.7	2.36	3.33	2.39	2.93	3.51	1.86	1.54	2.56
mml-miR-652	0.162311	8.12266	0.427764	0.99116	251.12	225.52	165.07	259.04	184.48	355.26	291.77	221.76	187.16	270.65	224.99	223.02
mml-miR-1306-3p	0.339148	0.685191	0.433657	0.99116	1.33	0.97	1.3	1.52	0.2	1.15	2.48	0.63	1	0.66	1.45	1.13
mml-miR-1185-3p	0.285102	0.994045	0.439867	0.99116	1.69	1.44	2.92	2.41	0.72	1.67	0.71	3.35	1	1.09	1.16	0.61
mml-miR-18a-5p	0.244922	3.52648	0.441202	0.99116	10.98	8.83	11.69	14.22	2.97	17.5	8.51	10.27	7.21	11.7	9.73	5.23
mml-miR-199a-5p	-0.208485	3.53195	0.446522	0.99116	8.46	11	10.06	10.16	7.68	8.02	6.38	8.7	8.62	19.02	13.97	4.71
mml-miR-27a-3p	-0.171675	6.44615	0.448667	0.99116	74.34	78.02	130.66	82.54	23.15	62.91	72.43	108.37	61.62	59.79	70.73	89.58
mml-miR-125b-5p	0.177593	9.60926	0.456487	0.99116	742.27	589.7	253.52	549.95	638.78	1951.17	317.92	331.28	392.35	560.64	1276.92	387.32
mml-let-7b-3p	0.180506	6.09437	0.462135	0.99116	59.51	54.79	71.9	60.06	77.54	23.43	64.63	41.29	49.09	80.56	26.02	76.97
mml-let-7i-3p	0.181426	4.74095	0.465018	0.99116	23.73	21.6	20.94	29.97	21.2	27.39	19.15	21.48	19.44	27.44	20.91	18.76
mml-miR-324-5p	0.139222	8.00065	0.470758	0.99116	220.85	207.74	155.49	198.85	296.96	253.19	199.74	152.8	158.81	259.39	232.8	234.91
mml-miR-937	0.322209	0.7161	0.471146	0.99116	1.26	1.04	0.81	1.14	1.13	0.94	2.31	0.73	1.8	1.09	0.87	0.72
mml-miR-769-5p	0.190652	2.24538	0.47406	0.99116	4.09	3.66	5.36	4.83	2.97	2.5	4.79	3.46	3.21	5.03	2.79	3.79
mml-miR-365-3p	-0.172538	3.69191	0.476935	0.99116	10.11	11.6	7.14	12.32	6.45	12.91	11.7	13.73	9.72	8.64	13.01	12.91
mml-miR-376a-3p	-0.20743	4.10983	0.478997	0.99116	15.21	15.09	38.79	12.95	4.4	12.29	7.62	25.05	8.72	10.93	19.08	11.68
mml-miR-377-3p	0.265233	1.53706	0.47914	0.99116	2.71	2.1	6.33	2.79	0.72	1.77	1.95	3.35	1	2.73	1.45	1.95
mml-miR-532-3p	0.182264	9.80874	0.479557	0.99116	783.84	709.3	644.52	744.36	1094.92	810.92	624.5	602.09	887.61	776.41	611	669.37
mml-miR-31-5p	-0.32473	0.889272	0.479781	0.99116	1.17	1.63	0.81	2.41	0.61	1.56	0.44	3.77	1.2	1.53	1.35	0.31
mml-miR-375	-0.446413	0.918267	0.480104	0.99116	0.92	1.77	0.16	1.27	0.51	1.15	1.51	1.78	5.41	0.66	0.48	0.51
mml-let-7d	-0.166372	11.2069	0.493039	0.99116	1838.62	2211.28	1683.44	2115.49	1126.68	2772.3	1495.2	2234.17	2452.32	1087.83	3661.18	1620.91
mml-miR-15a-3p	-0.230353	1.95717	0.49551	0.99116	2.87	3.51	5.19	3.05	1.74	1.87	2.48	3.46	1.9	6.34	3.28	2.56
mml-miR-423-5p	-0.171573	12.0013	0.499719	0.99116	3133.82	3747.51	2681.3	3291.58	2930.55	2729.39	4036.28	2758.18	5448.28	2865.5	3452.27	4213.33
mml-miR-194-3p	0.273561	0.862645	0.500308	0.99116	1.4	1.23	1.3	1.27	2.25	1.04	1.15	0.42	1.7	1.75	1.25	1.02
mml-miR-130a-3p	-0.179343	3.65113	0.50031	0.99116	9.5	11.61	9.41	10.79	6.04	15.94	5.32	11.42	10.02	4.81	23.61	8.2
mml-miR-10a-5p	0.150562	6.17185	0.502324	0.99116	63.6	59.48	73.2	80.38	58.29	50.2	55.94	81.96	52.9	56.73	52.42	53.4
mml-miR-125a-5p	0.142571	8.86182	0.513393	0.99116	404.38	376.09	362.43	386.91	535.43	432.96	304.18	355.7	396.66	458	336.67	333.41
mml-miR-107-3p	0.133309	7.74005	0.514209	0.99116	198.5	174.8	191.2	251.8	98.23	330.89	120.4	247.44	142.37	166.26	187.99	129.96
mml-miR-130b-3p	-0.189777	4.9041	0.519338	0.99116	22.83	27.93	17.37	25.4	16.39	41.35	13.65	26.1	24.45	12.35	56.37	20.4
mml-miR-324-3p	0.123416	7.68253	0.519978	0.99116	175.61	169.15	127.9	182.6	195.34	190.39	181.84	124.61	204.89	202.77	134.13	179.36
mml-miR-210-5p	0.247304	1.41469	0.523055	0.99116	2.1	2.01	2.6	1.27	2.56	2.29	1.77	1.15	2.71	3.83	1.45	0.92
mml-miR-1255b	-0.182723	2.48741	0.528257	0.99116	4.19	4.93	5.19	4.44	4.61	4.06	2.66	5.03	4.21	3.5	7.32	4.61
mml-miR-1296-5p	-0.125517	7.19688	0.530762	0.99116	115.82	132.89	147.54	147.3	86.97	54.37	142.91	138.23	211.81	114.23	57.72	142.46
mml-miR-21-3p	0.232509	0.974645	0.534221	0.99116	1.64	1.4	2.6	2.03	0.61	1.87	1.06	2.1	1.4	1.75	1.16	0.61
mml-miR-500a-3p	-0.163926	4.62721	0.536978	0.99116	19.7	22.58	19.8	29.84	14.14	19.89	14.81	31.65	22.14	17.82	18.12	23.16
mml-miR-224-5p	-0.647923	0.324677	0.539367	0.99116	0.73	1.04	0.97	2.41	0	0	0.27	0.1	2	1.86	1.25	0
mml-miR-361-3p	0.135079	12.0098	0.540795	0.99116	3619.98	3301.12	2173.93	4478.6	4728.28	4611.19	2107.9	2172.44	3534.8	4331.32	3805.23	2661.81
mml-miR-378d	0.155689	4.03285	0.541606	0.99116	14.66	12.98	9.58	16.89	10.45	24.06	12.32	13.94	11.82	12.13	14.07	12.91
mml-miR-942-5p	0.134587	11.4479	0.543321	0.99116	2390.38	2290.19	1595.15	2457.32	3037.08	2226.13	2636.21	1600.12	1997.14	2988.58	1802.74	3062.35
mml-miR-192-3p	-0.217882	1.66326	0.543917	0.99116	2.21	2.71	1.3	2.79	2.56	1.46	2.93	4.3	2.3	2.4	2.41	2.15
mml-miR-454-3p	0.126732	8.61025	0.546114	0.99116	360.83	319.39	309.36	391.61	167.69	797.8	137.68	409.99	302.68	166.91	570.72	146.67
mml-miR-363-3p	-0.150196	4.15677	0.546508	0.99116	14.65	16.03	26.13	18.67	7.89	9.58	10.99	25.15	17.93	13.12	13.68	10.25
mml-miR-192-5p	-0.142396	9.04366	0.549743	0.99116	420.54	475.89	543.24	477.45	463.62	241.94	376.44	378.86	407.78	679.68	405.18	507.95
mml-miR-379-5p	0.157216	3.31917	0.550322	0.99116	8.62	8.79	16.72	5.97	2.15	15.41	2.84	22.95	5.21	2.51	11.85	1.43
mml-miR-335-3p	0.179082	4.6855	0.555362	0.99116	22.13	21.39	15.74	19.3	11.17	15.94	48.5	15.2	7.82	29.73	11.18	43.05
mml-miR-33a	-0.382861	0.503212	0.560082	0.99116	0.79	1.26	0.81	1.27	0.1	1.15	0.62	1.05	0.1	3.06	1.16	0.92
mml-miR-199a	-0.170783	3.75085	0.560262	0.99116	10.01	12.71	12.17	12.19	9.53	8.02	8.16	9.96	7.82	21.75	17.25	6.76
mml-miR-940	0.24935	0.618136	0.56186	0.99116	1.21	0.97	0.65	2.16	0.51	0.62	2.13	0.94	0.7	1.2	0.67	1.33
mml-miR-7186-5p	0.139524	5.60859	0.565405	0.99116	42.57	40.3	44.47	38.86	43.43	53.01	33.07	49.99	32.56	45.47	41.92	31.57
mml-miR-98	0.145918	6.00104	0.568005	0.99116	57.53	52.67	47.39	63.24	32.16	120.19	24.65	63.41	58.21	22.74	92.98	26.03
mml-miR-889-3p	-0.201548	1.48478	0.571188	0.99116	2.38	2.35	7.3	2.16	0.2	1.77	0.44	6.5	1.6	1.2	1.73	0.72
mml-miR-1226	0.136184	8.20362	0.574963	0.99116	248.77	240.73	200.94	206.22	328.51	249.65	258.52	135.93	296.47	267.91	212.37	290.97
mml-miR-206	-0.341149	0.922775	0.579653	0.99116	1.22	1.61	1.95	0.38	0.41	2.5	0.89	0.84	2.81	2.73	1.06	0.61
mml-miR-17-5p	0.102668	8.10647	0.581357	0.99116	248.77	231.87	271.7	292.94	113.91	453.79	111.53	323.31	211.01	137.18	378.59	109.26
mml-miR-503-5p	-0.113526	6.94087	0.583043	0.99116	98.75	110.38	70.6	82.66	77.03	180.81	82.63	87.3	83.06	70.18	186.55	124.83
mml-let-7g-3p	-0.158497	1.92813	0.592666	0.99116	2.88	3.33	4.71	3.17	1.95	2.19	2.39	3.98	2.2	5.14	2.89	2.46
mml-miR-425	0.0977326	14.4286	0.604389	0.99116	18833.5	18491.9	13318.9	23240.4	20892.1	11928.5	24787.4	14789.4	12333.6	30214.1	14263.7	20858.7
mml-miR-15a-5p	-0.115455	10.5371	0.608079	0.99116	1263.9	1344.9	1786.5	1449.86	416.09	2052.2	614.83	2004.97	1154.92	767.89	2160.03	636.68
mml-miR-1240	0.153923	4.03228	0.608342	0.99116	13.88	12.76	8.93	11.17	21.41	16.98	10.9	7.34	17.03	14.21	12.62	12.61
mml-miR-370-3p	0.155689	4.72084	0.610296	0.99116	24.07	21.8	36.19	18.67	10.65	45.51	9.31	44.12	23.14	8.2	22.26	11.27
mml-miR-26b-5p	0.142908	10.6844	0.612898	0.99116	1471.02	1351.38	1266.31	1641.09	1057.84	2793.55	596.31	1611.33	1747.66	606.22	2049.32	742.35
mml-miR-942-3p	-0.177792	2.77706	0.617829	0.99116	4.91	5.85	1.79	5.59	7.79	2.5	6.92	1.36	9.72	4.26	5.49	8.4
mml-miR-92b-5p	-0.157409	1.32029	0.621235	0.99116	1.76	2.05	1.46	1.9	1.33	1.98	2.13	1.26	1.5	2.4	2.41	2.66
mml-miR-93-5p	-0.0866192	15.0166	0.622039	0.99116	27635.9	30384.8	27742.2	30875.5	10924.5	57036.4	11600.9	46774.2	25707.9	12264.9	54633.5	12543.5
mml-miR-503-3p	0.134571	5.86102	0.623565	0.99116	50.89	46.29	29.54	36.32	60.64	83.53	44.42	38.99	34.27	37.27	68.03	52.89
mml-miR-30c-5p	0.115741	13.689	0.626248	0.99116	11466.6	10642.7	12565.6	11768.9	16140.3	6714.84	10143.2	10327.1	8660.06	11973.2	11350.5	10902.8
mml-miR-190a-5p	0.142829	4.83273	0.627412	0.99116	24.54	25.84	68.01	5.46	17.11	15.21	16.93	60.68	3.91	41.86	8.19	14.55
mml-miR-15b-5p	-0.105842	13.2703	0.630453	0.99116	7955.58	8985.52	10396	9696.22	5572.44	8413.03	5700.19	11156.6	11652.6	4778.17	9519.58	7820.63
mml-miR-4677-5p	-0.173018	0.989964	0.634148	0.99116	1.3	1.63	0.65	1.27	2.25	1.35	0.98	1.57	1	3.28	1.25	1.02
mml-miR-432-5p	-0.131231	4.8417	0.635173	0.99116	24.74	25.01	41.06	20.32	8.09	43.95	10.28	34.79	25.95	10.27	37	17.01
mml-miR-376c-3p	0.123448	2.91052	0.635997	0.99116	7.01	5.99	16.23	5.71	1.43	5.62	6.03	11.84	3.11	3.72	6.36	4.92
mml-miR-6827-5p	-0.22113	0.395679	0.638138	0.99116	0.79	1.01	0.65	1.02	0.51	1.04	0.71	1.15	1.8	0.11	1.25	0.72
mml-miR-3122	0.118982	3.706	0.639043	0.99116	11.67	10.29	7.47	17.52	9.63	17.71	6.03	9.64	10.32	10.49	11.76	9.22
mml-miR-142-5p	0.109659	12.8052	0.64523	0.99116	6358.62	6015.44	8208.15	6655.42	3981.22	8346.68	4601.64	4675.11	5569.41	8965.31	5689.87	5177.47
mml-miR-154-5p	0.11012	5.5353	0.659342	0.99116	40.83	39.8	74.99	36.44	28.58	37.08	27.04	72.63	21.14	33.99	42.01	29.21
mml-miR-106a-5p	0.105566	5.70357	0.66014	0.99116	46.67	43.86	50.96	56.51	17.11	85.3	23.49	57.54	42.48	23.17	77.47	18.65
mml-miR-373	0.133764	2.02207	0.661565	0.99116	3.34	3.24	3.57	1.52	1.02	7.39	3.19	4.93	0.8	0.66	5.49	4.3
mml-miR-4766-5p	0.125776	2.17296	0.664318	0.99116	3.77	3.57	3.9	4.95	3.28	4.69	2.04	5.55	3.51	2.08	3.76	2.97
mml-miR-423-3p	0.0881373	12.7939	0.669185	0.99116	6033.02	5885.03	4487.77	5072.1	6200.88	4118.04	10286.3	4258.63	5606.88	8118.62	3423.08	8017.93
mml-miR-421	-0.111391	6.38115	0.67359	0.99116	66.06	73.91	73.52	61.71	80.41	55.41	59.22	68.33	66.53	60.23	89.71	84.76
mml-miR-132-3p	0.0963239	2.797	0.675441	0.99116	5.91	5.63	5.68	9.52	4.81	4.37	5.14	6.81	5.91	6.34	4.05	5.02
mml-miR-223	-0.0769249	15.2602	0.675466	0.99116	32249.5	35357.9	46583.3	37040.8	22798.7	27766.2	27058.2	46422.8	32401	21200	33620.6	43145.3
mml-miR-26a-5p	0.0933871	11.7834	0.677987	0.99116	3041.99	2977.57	3490.39	3188.22	2808.35	3115.58	2607.4	3622.69	2552.81	2592.45	3459.5	2660.38
mml-miR-301a-3p	-0.110638	2.93319	0.679886	0.99116	6.51	6.41	9.09	7.11	1.64	11.98	2.75	7.55	8.92	4.81	8	2.77
mml-miR-138-3p	0.108214	2.98404	0.682912	0.99116	6.6	6.39	6.33	10.03	6.04	5.1	5.5	5.76	9.92	3.61	5.49	7.17
mml-miR-451	-0.0968874	15.3871	0.683441	0.99116	37247.1	37248.4	59925.4	40119.6	15412.4	19209.8	51568.1	40849.4	25372.4	47187	30466.2	42366.8
mml-miR-221-5p	0.0909874	2.89714	0.686559	0.99116	6.25	6.07	6.49	7.36	5.43	6.67	5.32	7.13	6.31	5.47	5.59	5.84
mml-miR-933	0.140769	1.85396	0.690889	0.99116	2.84	2.69	0.16	0.63	4.81	6.46	2.13	0.94	0.1	4.15	5.59	2.66
mml-miR-337-5p	-0.116594	2.10725	0.691191	0.99116	3.7	3.68	9.74	3.05	0.41	4.17	1.15	9.01	1.9	1.2	4.53	1.74
mml-miR-551a	-0.132457	2.03487	0.692033	0.99116	2.99	3.54	0.65	4.06	1.64	8.23	0.35	0.94	2.3	2.95	11.27	0.2
mml-let-7a-5p	-0.0863719	14.6036	0.692659	0.99116	19945.1	22738.7	18140.2	19843.8	13764.1	37334.5	10643.1	24617.9	24297.5	9848.74	42515.2	12414.3
mml-miR-372-3p	-0.14378	1.98965	0.694247	0.99116	3.2	3.37	4.54	1.02	0.2	8.12	2.13	7.65	0.3	1.31	4.63	2.97
mml-miR-3200-3p	-0.0773246	7.62948	0.696742	0.99116	157.21	176.55	147.54	170.79	154.06	110.19	203.47	151.54	190.17	144.07	116.98	280.01
mml-miR-30b-3p	0.184597	0.501588	0.697985	0.99116	1.07	0.96	1.62	1.02	0.72	1.56	0.44	1.15	1.7	0.66	0.39	0.92
mml-miR-4766-3p	-0.103295	4.79304	0.698198	0.99116	22.04	24.93	25.64	22.98	18.95	14.27	28.37	20.86	16.73	33.99	19.56	33.51
mml-miR-145-5p	-0.130394	2.26409	0.698501	0.99116	3.36	4.38	1.62	3.68	3.28	3.54	4.7	2.83	2.91	10.71	3.28	2.15
mml-miR-362-3p	0.180731	0.333735	0.700779	0.99116	0.87	0.86	0.97	0.76	0.41	0.62	1.6	1.05	0.3	1.53	0.29	1.13
mml-miR-501-3p	0.18361	0.675465	0.701105	0.99116	1.22	1.11	2.11	1.27	1.43	0.42	0.89	0.42	1.8	1.31	0.48	1.54
mml-miR-133c-3p	0.233155	3.95576	0.701688	0.99116	10.16	16.14	13.96	4.7	9.83	15.94	6.38	5.87	20.44	48.75	3.37	2.25
mml-miR-671-3p	0.0722871	7.98487	0.703925	0.99116	210.89	212.91	157.92	171.3	290.91	187.06	247.26	174.6	176.54	330.66	136.25	246.49
mml-miR-505-3p	-0.111813	6.1777	0.70743	0.99116	58.68	62.9	88.94	38.86	63.61	23.33	78.64	69.59	61.42	43.4	37	103.11
mml-miR-10b-5p	-0.113775	2.52192	0.70903	0.99116	4.27	5.22	4.06	6.35	3.18	2.19	5.59	3.88	3.21	11.7	2.7	4.61
mml-miR-330-3p	-0.105167	1.71917	0.713048	0.99116	2.45	2.69	1.79	3.3	1.74	2.5	2.93	1.89	3.61	2.3	2.89	2.77
mml-miR-30a-5p	-0.0755881	6.66417	0.715639	0.99116	85.76	92.47	164.09	104.63	23.87	90.3	45.92	166.64	86.67	26.45	129.7	52.89
mml-miR-362-5p	-0.0915408	4.51961	0.718138	0.99116	18.3	20.32	14.28	21.33	17.21	12.08	26.6	20.02	14.63	29.08	13.78	24.09
mml-miR-487b-5p	0.105949	1.97755	0.719557	0.99116	3.41	3.11	7.63	2.54	2.05	2.71	2.13	5.66	2.81	1.75	3.18	2.15
mml-miR-197-3p	0.084102	11.9099	0.721389	0.99116	3244.36	3184.45	2532.79	2760.55	3798.27	2502.13	4628.06	2226.2	3532.59	4206.16	2322.1	3635.18
mml-miR-582-3p	0.0948044	2.98624	0.721718	0.99116	7.68	6.14	20.13	8.76	0.31	3.02	6.21	12.68	6.41	0.66	3.47	7.48
mml-miR-205	-0.110346	1.30541	0.723385	0.99116	1.81	2.02	2.27	2.16	1.74	1.35	1.51	2.41	1.9	2.4	1.64	1.74
mml-miR-636	0.0925818	4.62998	0.72392	0.99116	20.48	20.41	11.2	18.41	24.89	17.29	30.59	12.16	19.74	27.22	11.76	31.16
mml-miR-6505-5p	0.140711	0.791327	0.727126	0.99116	1.28	1.22	1.14	1.52	1.43	1.35	0.98	0.84	1.9	0.77	1.45	1.13
mml-miR-103-3p	0.0792185	12.306	0.727306	0.99116	4614.91	4231.79	4278.55	5392.73	2299.45	8463.02	2640.82	6353.3	3543.11	3306.67	5085.91	2869.97
mml-miR-590-3p	0.104955	1.84667	0.72831	0.99116	3.01	2.78	3.25	2.54	1.84	6.46	0.98	4.09	2.71	1.75	4.43	0.92
mml-miR-200c-3p	-0.0945146	3.85297	0.728437	0.99116	12	12.55	7.95	6.86	5.33	36.77	3.1	14.15	7.21	4.48	33.44	3.48
mml-miR-99b-5p	0.0874281	5.93861	0.729937	0.99116	52.18	50.87	54.53	45.84	65.97	46.14	48.41	61.52	40.08	49.52	54.06	49.2
mml-miR-106b-5p	-0.0857881	5.85316	0.73661	0.99116	49.2	51.68	61.68	58.92	15.16	73.63	36.62	72.1	39.08	36.51	81.71	29.01
mml-miR-369-5p	-0.0795507	3.78308	0.738854	0.99116	11.55	12.49	22.24	8.76	3.99	16.46	6.29	27.14	5.81	7.87	14.36	7.28
mml-miR-3140	0.106125	1.67855	0.749228	0.99116	2.54	2.47	1.62	2.16	2.15	4.48	2.31	2.93	2.5	3.06	2.7	1.13
mml-miR-186-3p	-0.125299	0.471728	0.750709	0.99116	0.96	1.05	1.62	1.4	0.61	0.62	0.53	1.78	1	1.09	0.58	0.82
mml-miR-628-3p	-0.0805707	3.2746	0.754081	0.99116	7.58	8.47	8.6	6.6	7.27	8.85	6.56	10.38	8.32	6.23	11.27	6.15
mml-miR-96	0.132801	0.586274	0.754667	0.99116	1.2	0.98	0.81	1.9	0.41	2.5	0.35	0.84	1	1.2	1.35	0.51
mml-miR-339-3p	0.0692361	9.65745	0.758091	0.99116	680.89	698.55	663.99	689.38	653.33	577.52	820.25	715.48	407.58	1019.73	606.37	743.58
mml-miR-34a-5p	0.0756224	6.26584	0.759694	0.99116	67.78	66.44	63.46	95.36	21.92	104.36	53.81	113.08	65.73	21.32	68.32	63.75
mml-miR-3146	-0.111271	1.71455	0.76027	0.99116	2.39	2.69	2.6	1.52	3.48	1.87	2.48	2.2	2	1.86	3.47	3.89
mml-miR-20a-5p	0.0770701	6.40541	0.768368	0.99116	77.67	71.24	83.1	90.92	24.17	149.04	41.14	98.62	48.99	67.11	112.35	29.11
mml-miR-185-5p	-0.0631585	11.471	0.771417	0.99116	2339.15	2497.61	1731.97	3333.74	1727.76	2354.03	2548.26	2014.4	2807.3	2088.65	2358.72	3218.96
mml-miR-196a-5p	-0.0640186	7.96732	0.781493	0.99116	202.29	226.82	275.6	238.09	202.82	247.88	47.08	376.34	281.74	144.72	278.09	53.19
mml-miR-491-3p	-0.0713725	3.93375	0.783699	0.99116	12.49	13.53	15.42	17.02	9.53	11.46	9.04	12.47	9.72	19.57	13.68	12.2
mml-miR-148a-3p	-0.0600436	9.37628	0.792135	0.99116	587.29	578.47	934.07	571.54	211.22	833.94	385.66	815.46	421.41	398.97	661.01	595.48
mml-miR-139-5p	0.0936302	1.29184	0.792841	0.99116	1.82	1.87	1.62	1.4	1.64	2.4	2.04	1.05	1.2	1.42	3.85	1.84
mml-miR-188-5p	-0.0819196	1.50541	0.7934	0.99116	2.1	2.34	1.62	3.3	1.95	1.87	1.77	1.99	1.8	3.94	1.83	2.15
mml-miR-151-5p	0.0557645	6.62176	0.799112	0.99116	84.58	82.19	94.3	118.85	89.22	64.78	55.77	84.68	96.18	79.14	87.01	63.95
mml-miR-1255a-5p	-0.0929646	0.862764	0.80421	0.99116	1.22	1.42	0.97	1.27	1.13	1.15	1.6	0.73	1.4	1.31	0.87	2.77
mml-miR-28-3p	0.0628184	7.90393	0.805192	0.99116	202.97	195.96	203.05	175.61	301.36	163.83	171.02	217.46	192.47	160.46	175.95	233.48
mml-miR-543-5p	0.0879443	1.10501	0.806231	0.99116	1.72	1.63	3.25	2.03	1.13	1.15	1.06	2.93	1.4	0.87	1.83	1.13
mml-miR-342-3p	-0.0653915	9.87254	0.809747	0.99116	776.2	802.89	669.35	1291.14	869.67	388.38	662.44	886.42	1165.54	617.37	610.04	735.07
mml-let-7g-5p	0.0520687	11.9712	0.813081	0.99116	3534.24	3452.91	3541.52	3502.5	1480.28	7757.81	1389.07	4177.2	3270.19	1435.32	6919.2	1462.66
mml-miR-1284	0.0676452	1.80962	0.813314	0.99116	2.73	2.72	1.95	2.54	3.99	1.98	3.19	2.52	2.1	3.61	2.31	3.07
mml-miR-374a-3p	-0.108941	1.03789	0.813958	0.99116	1.51	1.63	2.11	1.52	0.31	2.19	1.42	1.47	2	2.62	1.25	0.82
mml-miR-376b-5p	-0.094043	1.15873	0.819047	0.99116	1.91	1.73	5.52	1.4	0.2	1.46	0.98	3.46	0.9	1.64	1.83	0.82
mml-miR-296-3p	-0.0624644	4.08759	0.820472	0.99116	13.46	15.09	18.34	14.09	9.83	9.58	15.43	18.34	22.64	9.29	8.77	16.4
mml-miR-30e-5p	0.0516908	10.4202	0.825769	0.99116	1176.75	1192.03	1615.6	1324.66	938.71	1049.32	955.45	1383.49	785.51	1689.57	1050.1	1051.46
mml-miR-17-3p	0.0709935	2.51879	0.82636	0.99116	4.96	4.5	2.27	8.13	1.84	7.08	5.5	3.35	3.11	6.78	4.34	4.92
mml-miR-1306-5p	-0.0632974	7.99898	0.82866	0.99116	200.98	221.25	163.93	140.57	284.97	207.16	208.25	156.15	336.35	182.65	192.91	238.19
mml-miR-7184-3p	-0.0884277	0.767123	0.829207	0.99116	1.15	1.3	0.97	1.14	0.61	1.25	1.77	0.73	1.9	1.42	0.58	1.84
mml-miR-361-5p	0.0530111	11.5934	0.831712	0.99116	2628.46	2566.47	2095.54	3264.79	3210.3	1904.09	2667.59	2639.02	2513.43	2421.17	2448.52	2810.22
mml-miR-381-3p	0.0583873	5.13012	0.83324	0.99116	30.92	31.13	67.52	29.33	14.55	29.27	13.92	72.52	12.92	26.78	26.02	17.42
mml-miR-155	-0.0476097	7.58381	0.834076	0.99116	154.95	172.74	155.81	194.91	128.04	205.28	90.7	228.68	219.42	90.73	229.14	95.73
mml-miR-23b-5p	0.0613364	2.74234	0.834654	0.99116	5.8	5.25	6.82	3.43	3.99	11.46	3.28	4.82	6.11	4.15	6.46	4.71
mml-miR-1255a-3p	-0.0463238	3.28828	0.839502	0.99116	7.73	8.57	8.76	6.6	7.68	8.96	6.65	8.28	4.51	11.37	10.89	7.79
mml-miR-135a-5p	-0.0724081	1.42715	0.8413	0.99116	1.91	2.28	2.11	1.78	1.23	1.77	2.66	1.89	0.5	3.61	1.93	3.48
mml-miR-27b-3p	0.0409531	8.17147	0.841448	0.99116	251.04	246.6	349.61	269.07	168.2	302.46	165.88	322.89	243.17	175.22	240.22	251.51
mml-miR-550-3p	-0.0536408	2.42896	0.843317	0.99116	4.28	4.39	3.41	5.46	4.2	1.67	6.65	4.09	4.31	5.25	3.28	5.02
mml-miR-339-5p	-0.0325936	14.4669	0.845344	0.99116	18301	20205.4	18223.2	18772	20704.7	14767.1	19038.1	17587.9	14026.7	32844.4	16626.2	19942.1
mml-miR-128a-3p	-0.0456281	12.1829	0.85573	0.99116	3825.9	3989.63	4047.75	3984.26	5297.92	2547.44	3252.11	4382.5	3339.72	4045.92	3767.55	4412.47
mml-miR-128b-3p	-0.0454072	11.9669	0.856829	0.99116	3284.76	3438.66	3378.4	3313.68	4616.42	2245.29	2870	3648.26	2732.15	3583.44	3318.34	3911.08
mml-miR-25	0.0328726	16.0077	0.859714	0.99116	55408.7	55819.4	49904.4	54240.5	65155.7	63453.3	44289.5	57955.2	49912	45945.6	64965.7	60318.6
mml-miR-331-3p	0.0402015	11.7732	0.861765	0.99116	2905.5	2933.63	2557.3	3007.53	4032.03	1917.74	3012.91	2396.72	3406.05	3805.11	1929.74	3130.51
mml-miR-18b	-0.0480093	4.24395	0.862218	0.99116	16.76	16.12	19.48	21.71	6.25	28.85	7.54	21.59	12.72	16.94	20.23	9.12
mml-miR-7165-3p	0.0419695	2.40834	0.862668	0.99116	4.37	4.27	3.73	6.1	2.46	3.33	6.21	3.88	4.51	3.83	3.08	6.05
mml-miR-3200-5p	0.0638409	1.83933	0.863023	0.99116	2.78	2.75	2.6	2.41	3.59	1.15	4.17	1.47	3.01	1.86	2.6	4.82
mml-let-7i-5p	-0.0351854	13.0331	0.869574	0.99116	7592.11	7121.82	6185.65	8862.84	2268.72	17948.2	2695.17	10552.2	7321.78	2977.98	11705.3	3051.79
mml-miR-187-5p	-0.0446834	5.70772	0.87461	0.99116	43.13	47.71	87.97	40.13	17.11	33.22	37.24	87.72	51.9	11.91	35.75	51.25
mml-miR-7205-3p	-0.0440759	5.37131	0.875873	0.99116	33.56	36.01	39.6	23.75	48.14	45.2	11.08	38.67	40.18	56.62	33.53	11.07
mml-miR-30d-5p	0.0317997	13.247	0.876191	0.99116	8197.39	8290.36	8777.84	8954.4	9376.35	6865.34	7013.02	9812.19	7282.91	8348.71	7457.83	8550.17
mml-miR-30c-2-3p	0.0508031	1.48025	0.87708	0.99116	2.31	2.16	3.57	3.05	0.31	3.54	1.06	3.46	3.41	0.33	2.6	1.02
mml-miR-19a-3p	-0.036745	6.94593	0.881988	0.99116	106.95	108.2	180	126.98	47.43	107.28	73.05	118.22	101.09	150.74	111.48	59.45
mml-miR-30b-5p	0.0386045	10.6599	0.883595	0.99116	1385.62	1376.84	2072.16	1403.39	1388.81	871.85	1191.9	1429.18	973.67	1720.07	1531.69	1229.59
mml-miR-150-5p	-0.0298652	14.5278	0.883773	0.99116	19270	20531.2	17453.1	26253.3	21003.7	13688.1	17951.7	22766.3	29895.1	16804.3	14899.8	18290.6
mml-miR-502-3p	0.0383	4.75296	0.883985	0.99116	22.88	23.17	21.1	29.84	15.98	22.5	25	29.24	19.94	27.76	16.77	22.14
mml-miR-146b-5p	-0.0347428	2.38891	0.891853	0.99116	4.21	4.4	4.87	5.33	2.25	3.54	5.05	4.4	3.01	4.37	3.85	6.35
mml-miR-181a-3p	-0.0375372	3.99056	0.894031	0.99116	13.63	13.65	16.88	21.97	6.25	7.71	15.34	15.62	10.12	16.83	8.38	17.32
mml-miR-450a-1-3p	-0.0496616	1.56004	0.894915	0.99116	2.45	2.2	1.62	1.65	1.02	6.98	0.98	2.52	0.9	1.53	3.37	2.66
mml-miR-183-5p	0.0331047	2.53596	0.895115	0.99116	4.84	4.69	3.73	6.1	3.18	8.96	2.22	5.14	4.91	2.95	7.8	2.66
mml-miR-382-5p	-0.0345862	5.2598	0.898027	0.99116	33.48	33.91	54.37	29.84	11.58	63.01	8.6	69.27	25.35	11.37	49.62	13.94
mml-miR-1304	-0.0357837	5.53245	0.899102	0.99116	38.38	39.69	35.71	56	44.87	38.12	17.2	51.25	54.61	31.7	36.81	24.09
mml-miR-411-5p	0.0529143	0.959975	0.899784	0.99116	1.67	1.46	4.54	1.02	0.31	2.29	0.18	3.77	0.5	1.09	1.54	0.41
mml-miR-152-3p	-0.0311919	3.09725	0.90547	0.99116	6.82	7.39	7.63	5.33	5.74	12.29	3.1	5.45	4.31	5.68	16.19	5.33
mml-miR-7186-3p	-0.0269185	6.31033	0.905658	0.99116	65.02	69.61	92.03	45.71	81.23	58.95	47.17	72.52	37.97	99.58	81.81	56.17
mml-miR-195-5p	0.0445706	0.659129	0.906792	0.99116	1.17	1.14	1.62	1.02	0.72	1.98	0.53	1.78	0.8	0.87	1.54	0.72
mml-miR-149-5p	-0.0398089	1.1615	0.908792	0.99116	1.71	1.71	1.46	3.81	0.72	1.04	1.51	1.15	3.61	1.09	1.35	1.33
mml-miR-191-5p	-0.0268567	16.6689	0.910141	0.99116	85669.4	86920.9	80780.9	88697.9	132865	57561.5	68441.6	78785.5	109184	72208.1	93346.3	81080.7
mml-miR-181c-3p	-0.0397358	1.78877	0.911007	0.99116	2.82	2.85	5.03	3.56	0.92	1.77	2.84	3.98	1.1	3.5	2.51	3.18
mml-miR-30a-3p	-0.0287894	4.67501	0.911358	0.99116	21.27	22.76	31.81	22.48	10.96	26.14	14.98	36.05	19.64	10.71	29.87	17.53
mml-miR-6790-3p	-0.0260781	4.40063	0.917268	0.99116	17.11	17.99	10.55	18.16	21.31	18.43	17.11	13.52	14.83	22.08	18.5	21.01
mml-miR-19b	-0.0262773	12.3102	0.918028	0.99116	4301.72	4412.91	6329.45	5129.37	3443.24	2600.66	4005.87	3975.24	3783.78	5891.03	4648.45	3766.06
mml-miR-190b	0.0265614	4.53804	0.918444	0.99116	20.79	19.26	16.72	25.78	9.53	44.37	7.54	25.26	17.53	12.24	32.57	8.71
mml-miR-7194-3p	0.0276573	2.15987	0.921215	0.99116	3.63	3.65	4.87	4.7	2.97	2.5	3.1	2.72	3.51	4.59	2.6	4.82
mml-miR-656-3p	-0.0442118	0.504723	0.921353	0.99116	1.13	0.98	3.08	0.63	0.2	0.83	0.89	1.36	1.1	0.66	0.67	1.13
mml-miR-185-3p	0.0240557	3.91817	0.924824	0.99116	12.17	12.9	10.55	13.21	10.35	9.79	16.93	10.17	17.03	10.82	7.13	19.37
mml-let-7f-5p	-0.023434	12.4695	0.925457	0.99116	4803.49	4984.84	4886.39	4629.7	2823.51	9931.24	1746.63	5878.13	5407.2	1924.36	9219.52	2494.96
mml-miR-187-3p	-0.0205448	9.41662	0.927426	0.99116	580.53	618.2	832.63	724.42	222.28	744.47	378.83	1086.69	509.48	229.98	763.44	501.39
mml-miR-4677-3p	-0.0241413	1.91617	0.928958	0.99116	2.93	3.11	3.08	3.3	3.07	3.23	1.95	2.83	2.81	4.48	3.18	2.25
mml-miR-30e-3p	0.0179768	8.54235	0.931024	0.99116	311.13	319.12	360.48	279.36	376.45	254.23	285.12	322.37	247.78	381.7	280.21	363.54
mml-miR-182	0.0267921	5.06352	0.933589	0.99116	28.64	27.03	24.02	34.67	39.64	34.58	10.28	21.38	31.56	24.38	36.42	21.42
mml-miR-493-3p	-0.0298082	1.68069	0.934292	0.99116	2.59	2.67	3.9	2.16	0.82	5.62	0.44	7.13	1.9	1.2	2.41	0.72
mml-miR-181b-5p	0.0219693	5.3545	0.935683	0.99116	35.46	34.26	18.18	51.55	24.38	43.12	40.07	30.39	29.66	42.85	34.98	33.41
mml-miR-1180-3p	-0.0177803	8.65923	0.937346	0.99116	336.08	348.99	219.28	359.61	209.48	391.82	500.2	242.3	482.03	331.75	238.1	450.76
mml-miR-9-5p	0.0198461	2.42896	0.938119	0.99116	4.23	4.56	4.87	3.43	3.99	5.31	3.55	4.09	2.1	5.9	7.32	3.38
mml-miR-199a-3p	-0.0230235	4.60967	0.943356	0.99116	20.47	21.48	21.59	24.38	7.79	38.85	9.75	24.1	31.06	19.89	27.75	4.61
mml-let-7c-5p	-0.0135689	6.91953	0.946922	0.99116	101.31	105.96	78.07	95.49	59.92	203.82	69.24	96.31	104.5	55.42	204.47	69.08
mml-miR-186-5p	-0.0149245	11.8093	0.948164	0.99116	2968.95	3134.1	3294.65	3172.73	3087.38	1900.66	3389.35	2990.31	2124.39	3966.12	2719	3870.7
mml-miR-4446-5p	-0.0163259	2.31364	0.949327	0.99116	3.98	4.13	4.87	3.56	2.56	5.1	3.81	5.24	4.51	2.95	4.24	3.69
mml-miR-210-3p	-0.0133028	9.19981	0.949437	0.99116	511.8	515.06	520.03	573.32	242.67	1052.14	170.84	676.39	406.08	334.04	975.42	183.36
mml-miR-99a-5p	-0.0161266	5.13077	0.95012	0.99116	28.79	30.43	12.5	29.08	19.56	49.06	33.78	15.09	17.73	29.29	55.6	34.44
mml-miR-1241	0.0222658	0.489409	0.955143	0.99116	0.95	0.99	0.65	0.76	1.02	1.25	1.06	0.52	0.8	1.2	0.96	1.43
mml-miR-194-5p	0.0116984	8.11444	0.955342	0.99116	233.9	237.04	303.67	250.41	261.11	175.39	178.91	255.4	192.47	270.54	242.63	224.15
mml-miR-133d-3p	-0.0344102	5.00029	0.955937	0.99116	20.46	33.92	33.6	8.76	17.82	29.89	12.23	13.94	55.71	84.82	8.29	6.87
mml-miR-16-1-3p	0.020316	2.30813	0.961625	0.99116	4.47	3.93	5.52	6.48	1.02	7.92	1.42	5.97	1.6	5.36	3.95	2.77
mml-miR-140-3p	-0.00978545	13.2672	0.963244	0.99116	8266.75	8444.98	9425.61	10091.2	9327.59	5366.08	7123.22	8794.04	7854.61	9377.95	8052.26	8146.04
mml-miR-576-5p	-0.0125549	5.81896	0.963367	0.99116	47.48	49.69	47.39	83.43	30.42	32.91	43.26	35.63	50.2	86.03	31.8	44.79
mml-miR-7172-5p	-0.0105462	2.10776	0.969846	0.99116	3.38	3.46	2.6	2.79	2.25	2.19	7.09	2.72	2.3	4.7	2.22	5.33
mml-miR-26b-3p	-0.00831846	6.42319	0.970873	0.99116	71.38	73.46	90.89	76.44	78.46	44.16	66.94	83.11	82.96	68.75	52.51	79.94
mml-miR-16-5p	-0.00523699	16.6349	0.97551	0.99116	86141.3	90485.8	104698	84990.7	49573.5	157083	34361	129075	83443.5	37911.8	157355	44644.1
mml-miR-140-5p	0.00769012	6.08079	0.977391	0.99116	60.62	58.15	84.72	68.82	25.81	89.15	34.58	81.22	38.47	70.5	52.9	47.66
mml-miR-660-3p	-0.00678824	2.14529	0.979332	0.99116	3.43	3.63	3.41	3.94	4.71	1.46	3.63	2.72	3.41	6.12	2.02	3.89
mml-miR-151-3p	-0.00652266	10.6266	0.98157	0.99116	1334.24	1291.41	1228.66	1646.17	2162.5	850.5	783.37	1209.1	1522.93	1367.99	1266.51	1090.51
mml-miR-424-3p	0.0057807	4.74823	0.982266	0.99116	22.11	22.87	14.93	18.79	18.95	28.54	29.35	16.35	19.14	19.13	26.11	33.62
mml-miR-340-3p	0.00356218	7.10912	0.985973	0.99116	116.26	118.17	152.73	130.79	123.74	87.17	86.88	111.19	110.91	145.16	118.13	105.46
mml-miR-144	-0.00683195	6.3753	0.985981	0.99116	78.28	68.35	172.04	91.55	14.55	69.36	43.89	72.21	75.85	106.47	50.01	37.2
mml-miR-7172-3p	0.00861599	0.55401	0.987736	0.99116	1.04	1.03	0.65	1.52	1.84	0.73	0.44	1.57	1.1	0.66	0.58	1.23
mml-miR-181a-5p	-0.00315921	6.62456	0.988317	0.99116	83.8	84.69	51.13	126.35	54.39	82.07	105.06	81.75	94.98	86.35	50.3	110.08
mml-miR-584-3p	-0.00431157	5.25458	0.988391	0.99116	30.43	32.34	23.53	29.71	40.67	16.04	42.2	17.08	45.29	36.07	19.27	43.97
mml-miR-128a-5p	0.0011398	0.543163	0.997727	0.997727	0.99	1.07	1.46	0.25	1.02	1.25	0.98	1.89	1.3	0.44	0.67	1.02

## Sheet: E. PairedDE_miRNA_Grp5_Grp1
PairedDE_miRNA_Group5_vs_Group1_1
names	logFC	logCPM	PValue	FDR	Group5	Group1	Group5:3	Group5:11	Group5:15	Group5:24	Group5:26	Group1:2	Group1:10	Group1:18	Group1:20	Group1:30
mml-miR-16-2-3p	1.084	7.7479	9.67485e-07	0.000351197	275.33	100.48	105.15	59.32	862.7	69.59	279.87	70.64	41.88	273.05	43.46	73.38
mml-miR-133d-3p	-1.62941	4.61444	2.31789e-06	0.000420698	7.36	33.92	7.3	6.54	13.65	3.71	5.61	13.94	55.71	84.82	8.29	6.87
mml-miR-1262-5p	-1.11777	1.82722	0.000466726	0.0424846	1.62	3.97	1.22	1.35	0.94	1.9	2.67	3.25	2.61	1.86	2.22	9.94
mml-miR-33b-5p	1.23492	1.52271	0.000649658	0.0424846	3.3	1.22	2.07	1.13	7.45	1.63	4.23	1.68	1	1.64	0.96	0.82
mml-miR-338-3p	-0.683659	4.14064	0.000690663	0.0424846	11.07	18.54	12.41	11.05	6.09	14.48	11.31	24.94	15.13	7.98	19.85	24.8
mml-miR-17-3p	0.761608	2.91831	0.000803447	0.0424846	8	4.5	4.5	3.61	14.17	7.69	10.03	3.35	3.11	6.78	4.34	4.92
mml-miR-138-5p	0.873646	2.76415	0.000819263	0.0424846	7.23	4.06	7.91	4.4	11.65	7.51	4.69	7.55	2.91	3.94	3.76	2.15
mml-miR-200a-3p	1.17838	0.789341	0.00116237	0.0527425	1.73	0.75	0.97	1.58	1.36	3.89	0.83	0.73	0.7	0.66	1.35	0.31
mml-miR-221-3p	0.663858	11.4363	0.00381002	0.119699	2996.48	1752.74	1890.58	1401.05	5024.78	4141.03	2524.94	2355.32	1418.43	1951.8	1722.28	1315.89
mml-miR-30a-5p	-0.583389	6.50756	0.00384714	0.119699	63.45	92.47	129.98	71.73	13.33	54.57	47.64	166.64	86.67	26.45	129.7	52.89
mml-miR-1306-3p	1.00722	1.02213	0.00389094	0.119699	2.02	0.97	0.61	1.35	2.94	2.9	2.3	0.63	1	0.66	1.45	1.13
mml-miR-378a	0.613198	6.90998	0.003957	0.119699	127.28	78.46	87.14	64.96	208.4	149.68	126.19	91.28	59.21	85.04	84.79	71.95
mml-miR-16-1-3p	0.748174	2.70584	0.00440056	0.122877	6.97	3.93	6.69	3.05	15.54	4.8	4.78	5.97	1.6	5.36	3.95	2.77
mml-miR-181b-5p	0.60149	5.73526	0.00577365	0.144196	55.86	34.26	27.14	33.38	78.95	82.26	57.58	30.39	29.66	42.85	34.98	33.41
mml-miR-877-3p	0.51471	3.88765	0.00632914	0.144196	14.5	10.3	9.74	13.76	21.21	10.5	17.29	5.97	8.52	15.85	8.86	12.3
mml-miR-206	-1.43716	0.616013	0.00652048	0.144196	0.56	1.61	0	0.56	0.31	1	0.92	0.84	2.81	2.73	1.06	0.61
mml-miR-133c-3p	-1.18349	3.5801	0.00683156	0.144196	3.96	16.14	4.5	3.38	6.09	2.62	3.22	5.87	20.44	48.75	3.37	2.25
mml-miR-29b-3p	-0.445427	7.95083	0.00715022	0.144196	175.34	246.95	190.59	133.76	142.26	220.09	190.02	209.81	153.29	238.95	378.39	254.28
mml-miR-181a-5p	0.67613	7.0521	0.00804036	0.153613	140.7	84.69	70.83	92.59	212.39	148.78	178.89	81.75	94.98	86.35	50.3	110.08
mml-miR-28-3p	-0.430283	7.6528	0.00961876	0.174581	146.49	195.96	192.05	168.6	109.08	111.04	151.66	217.46	192.47	160.46	175.95	233.48
mml-let-7b-5p	0.658022	12.6647	0.0112979	0.190223	7074.06	3912	3354.71	4618.28	10824	12660.2	3913.18	3178.22	4250.27	3314.65	4726.21	4090.65
mml-miR-584-5p	0.449046	9.41801	0.0115287	0.190223	673.83	488.1	467.35	554.76	883.27	844.26	619.53	541.62	553.87	409.36	527.46	408.22
mml-miR-142-3p	-0.559766	13.789	0.0134684	0.212567	9570.31	14637.2	11170.8	10684.1	8373.3	6404.49	11218.9	14347	10968.7	22992.5	9566.41	15311.3
mml-miR-376c-5p	-0.716395	1.35742	0.0147576	0.214036	1.52	2.49	3.29	1.02	0.94	1.45	0.92	4.4	1.7	1.86	3.37	1.13
mml-miR-1284	-0.716586	1.49075	0.0148915	0.214036	1.69	2.72	2.07	2.03	1.89	0.63	1.84	2.52	2.1	3.61	2.31	3.07
mml-miR-1249	0.411293	7.21115	0.0156082	0.214036	144.19	108.68	104.18	120	212.39	96.11	188.27	94.64	86.47	156.75	68.7	136.83
mml-miR-154-5p	-0.440119	5.36481	0.0160281	0.214036	31.51	39.8	73.88	17.03	18.27	28.05	20.33	72.63	21.14	33.99	42.01	29.21
mml-miR-101-1-5p	0.900317	0.808043	0.0167201	0.214036	1.75	0.85	0.85	0.68	4.83	1.45	0.92	0.84	0.5	1.53	1.06	0.31
mml-miR-151-3p	-0.3698	10.4173	0.0170993	0.214036	1031.49	1291.41	1307.49	1434.32	1027.11	653.4	735.14	1209.1	1522.93	1367.99	1266.51	1090.51
mml-miR-26b-3p	-0.410383	6.2569	0.0219144	0.251973	56.19	73.46	74.48	75.11	41.37	38.19	51.78	83.11	82.96	68.75	52.51	79.94
mml-miR-1260b	0.38925	5.83235	0.0222386	0.251973	54.56	42.06	40.89	49.17	81.68	41.54	59.51	31.13	46.59	56.95	27.65	47.97
mml-miR-26a-2-3p	-0.538157	3.80341	0.0222933	0.251973	9.53	13.98	12.9	12.52	9.55	6.33	6.35	13.21	12.02	23.17	11.76	9.74
mml-miR-652	0.411186	8.30405	0.0230222	0.251973	313.55	225.52	198.5	183.6	431.93	394.21	359.52	221.76	187.16	270.65	224.99	223.02
mml-miR-450a-1-3p	0.743991	1.91791	0.0236008	0.251973	3.82	2.2	2.19	1.58	7.03	4.71	3.59	2.52	0.9	1.53	3.37	2.66
mml-miR-378d	0.495279	4.25045	0.0255173	0.254694	19.2	12.98	15.94	9.81	30.55	20.72	18.95	13.94	11.82	12.13	14.07	12.91
mml-miR-128a-3p	-0.35903	12.0273	0.0255869	0.254694	3166.73	3989.63	4353.92	2858.6	3153.77	1985.54	3481.83	4382.5	3339.72	4045.92	3767.55	4412.47
mml-miR-128b-3p	-0.352826	11.8133	0.0259606	0.254694	2734.19	3438.66	3714.11	2342.07	2788.93	1749.97	3075.86	3648.26	2732.15	3583.44	3318.34	3911.08
mml-miR-484	0.467601	13.948	0.0274627	0.257992	15409.2	11477.6	8696.03	12938.9	21619.2	11900.1	21891.8	7727.47	11767.8	18366.9	5560.76	13965
mml-miR-210-5p	0.632593	1.65928	0.0282424	0.257992	2.95	2.01	1.58	3.16	4.83	2.53	2.67	1.15	2.71	3.83	1.45	0.92
mml-miR-194-5p	-0.361563	7.94371	0.0284288	0.257992	184.21	237.04	242.44	157.66	157.69	166.97	196.27	255.4	192.47	270.54	242.63	224.15
mml-miR-126	-0.311314	9.42219	0.0292451	0.258926	504.15	666.3	700.54	553.86	256.28	891.23	118.83	1119.39	587.43	247.8	1213.42	163.47
mml-miR-23b-5p	0.47466	2.92699	0.0335182	0.275129	7.26	5.25	6.45	8.23	8.92	6.97	5.7	4.82	6.11	4.15	6.46	4.71
mml-miR-27b-3p	-0.336284	8.01137	0.0346183	0.275129	193.66	246.6	263.01	208.87	171.55	168.6	156.26	322.89	243.17	175.22	240.22	251.51
mml-miR-1262-3p	-0.640437	3.52007	0.0350568	0.275129	7.02	11.81	4.87	7.11	2.83	14.48	5.79	7.23	10.52	3.17	13.1	25.01
mml-miR-144	0.433077	6.51526	0.0362659	0.275129	86.69	68.35	74.48	102.06	98.06	78.19	80.66	72.21	75.85	106.47	50.01	37.2
mml-miR-361-5p	-0.313567	11.417	0.0367376	0.275129	2086.96	2566.47	2511.53	2204.48	1398.45	1898.21	2422.11	2639.02	2513.43	2421.17	2448.52	2810.22
mml-miR-26b-5p	-0.333667	10.5456	0.0372333	0.275129	1161.78	1351.38	1092.19	1491.83	505.21	2307.8	411.86	1611.33	1747.66	606.22	2049.32	742.35
mml-miR-4446-5p	0.460493	2.57517	0.0375444	0.275129	5.65	4.13	7.79	5.75	4.2	5.07	5.43	5.24	4.51	2.95	4.24	3.69
mml-miR-340-5p	0.422125	7.10374	0.0378471	0.275129	131.95	101.84	113.67	139.85	138.06	119.46	148.72	149.87	106.2	89.2	84.79	79.12
mml-miR-18a-3p	0.377139	9.57182	0.0380639	0.275129	711.69	584.06	415.26	514.04	920.33	685.53	1023.29	354.13	449.56	992.73	288.97	834.9
mml-miR-222-3p	0.378802	7.9547	0.0389609	0.275129	246.58	178.43	144.34	120.9	404.1	267.42	296.15	169.26	118.63	244.85	188.47	170.96
mml-miR-381-3p	-0.384141	4.99645	0.0405259	0.275129	24.48	31.13	63.77	12.52	15.01	15.29	15.82	72.52	12.92	26.78	26.02	17.42
mml-miR-671-5p	0.428421	4.68075	0.0407917	0.275129	25.66	17.95	12.9	11.5	48.29	23.71	31.91	14.67	11.22	31.15	18.89	13.84
mml-miR-320a	0.406844	11.6934	0.0409283	0.275129	3159.37	2422.99	1614.56	2560.75	3112.61	4085.01	4423.91	1489.66	2932.64	1894.52	1736.16	4061.95
mml-miR-210-3p	0.332999	9.3416	0.0436	0.28776	591.82	515.06	587.84	454.72	637.7	978.74	300.11	676.39	406.08	334.04	975.42	183.36
mml-miR-106b-3p	0.340864	11.4994	0.0469126	0.296831	2782.22	2145.67	1894.6	2048.62	3924.7	3196.14	2847.03	1971.12	2195.72	2331.43	1823.07	2407.02
mml-miR-197-3p	0.295224	12.0232	0.0476851	0.296831	3882.39	3184.45	2774.17	4113.59	5756.55	3032.88	3734.75	2226.2	3532.59	4206.16	2322.1	3635.18
mml-miR-30a-3p	-0.358	4.56795	0.0482557	0.296831	17.49	22.76	29.7	18.27	9.24	17.74	12.51	36.05	19.64	10.71	29.87	17.53
mml-miR-320b	0.446109	5.52196	0.0489157	0.296831	44.48	32.6	19.72	31.92	45.04	61.9	63.83	18.65	33.26	29.51	22.74	58.83
mml-miR-18a-5p	0.45908	3.64279	0.0492043	0.296831	12.18	8.83	9.86	8.01	19.21	10.05	13.8	10.27	7.21	11.7	9.73	5.23
mml-miR-4446-3p	0.549402	1.6612	0.0506353	0.296831	2.88	2.02	1.46	5.08	2.1	2.71	3.04	1.47	3.81	0.77	2.12	1.95
mml-miR-187-3p	0.311212	9.59559	0.0506984	0.296831	711.64	618.2	1135.76	493.52	488.62	824.17	616.13	1086.69	509.48	229.98	763.44	501.39
mml-miR-26a-5p	-0.304247	11.6409	0.0524302	0.300123	2463.29	2977.57	2772.35	2124.63	1752.9	3768.27	1898.33	3622.69	2552.81	2592.45	3459.5	2660.38
mml-miR-486-3p	1.01283	1.49835	0.0538237	0.300123	2.93	1.42	0.85	0.56	4.41	4.98	3.86	1.05	1	3.94	0.39	0.72
mml-miR-374b-5p	-0.378588	6.59016	0.0545409	0.300123	72.21	92.97	121.34	60.34	38.74	90.05	50.59	152.07	77.95	82.2	100.98	51.66
mml-miR-3140	0.538802	1.91769	0.0556411	0.300123	3.53	2.47	2.68	2.59	4.3	5.43	2.67	2.93	2.5	3.06	2.7	1.13
mml-miR-186-5p	-0.284082	11.7025	0.0561774	0.300123	2588.17	3134.1	2991.05	1811.56	2860.85	1722.01	3555.41	2990.31	2124.39	3966.12	2719	3870.7
mml-miR-335-5p	-0.377051	4.16721	0.0562214	0.300123	13.54	16.49	10.1	11.28	8.19	7.69	30.44	11	15.53	11.59	15.13	29.21
mml-miR-27a-3p	-0.327037	6.34841	0.0683004	0.35932	61.4	78.02	73.39	52.67	65.3	42.17	73.49	108.37	61.62	59.79	70.73	89.58
mml-miR-29b-2-5p	0.410195	4.18346	0.0692921	0.359329	17.23	13.28	14.12	11.84	22.26	24.25	13.7	14.88	12.32	8.42	21.78	9.02
mml-miR-342-5p	0.472616	2.3596	0.0710909	0.363465	4.73	3.48	3.65	5.98	2.62	4.89	6.53	1.68	5.61	3.06	3.28	3.79
mml-miR-30e-3p	-0.291698	8.41042	0.0721533	0.363773	263.9	319.12	332.38	244.5	312.76	154.48	275.37	322.37	247.78	381.7	280.21	363.54
mml-let-7f-5p	-0.3462	12.3879	0.0744429	0.370175	4048.01	4984.84	3132.72	4607.34	2258.53	8835.73	1405.72	5878.13	5407.2	1924.36	9219.52	2494.96
mml-miR-30b-3p	0.7154	0.776895	0.0762209	0.373895	1.56	0.96	1.58	1.02	2.73	1.18	1.29	1.15	1.7	0.66	0.39	0.92
mml-miR-340-3p	-0.354944	6.95817	0.0776479	0.375816	93.59	118.17	125.24	111.31	81.05	63.53	86.82	111.19	110.91	145.16	118.13	105.46
mml-miR-296-5p	0.222817	10.4502	0.0814716	0.387457	1287.45	1098.9	1261.24	1398.45	1811.17	683.54	1282.84	1183.74	1347.69	1383.07	679.89	900.08
mml-miR-7186-3p	-0.348842	6.169	0.083078	0.387457	54.3	69.61	86.41	33.38	59.42	41.63	50.68	72.52	37.97	99.58	81.81	56.17
mml-miR-375	0.881873	1.38316	0.0832552	0.387457	2.2	1.77	1.95	1.92	1.68	2.53	2.94	1.78	5.41	0.66	0.48	0.51
mml-miR-450b-5p	-0.601423	1.01685	0.086459	0.397274	1.17	1.85	0.61	1.35	1.26	1.27	1.38	1.78	0.9	1.97	1.54	3.07
mml-miR-9-5p	-0.538057	2.23626	0.0889196	0.403473	3.07	4.56	4.02	2.93	1.57	4.8	2.02	4.09	2.1	5.9	7.32	3.38
mml-miR-148b-5p	-0.336293	3.8962	0.0906542	0.406265	11.17	13.77	9.49	5.98	9.03	18.73	12.6	14.57	9.02	13.01	19.37	12.91
mml-miR-940	0.579412	0.769668	0.0972283	0.429365	1.53	0.97	0.85	1.02	2.83	0.72	2.21	0.94	0.7	1.2	0.67	1.33
mml-miR-664	0.346631	3.48555	0.0997459	0.429365	10.6	8.25	9.86	6.09	17.11	6.97	12.97	6.81	6.31	14.1	7.03	6.97
mml-miR-142-5p	0.282525	12.9444	0.100213	0.429365	7483.94	6015.44	5723.6	5470.21	12612.2	5431.81	8181.84	4675.11	5569.41	8965.31	5689.87	5177.47
mml-miR-1235	-0.544649	2.50952	0.10054	0.429365	3.32	5.8	0	4.96	3.57	2.71	5.33	0	5.61	4.81	2.51	16.09
mml-miR-145-5p	-0.63037	2.07074	0.104322	0.430714	2.48	4.38	4.5	1.8	1.99	1.63	2.48	2.83	2.91	10.71	3.28	2.15
mml-miR-491-5p	0.262245	7.74077	0.104598	0.430714	199.23	165.48	160.17	166.69	253.65	144.44	271.23	157.62	157.6	209.87	113.32	188.99
mml-miR-96	0.554235	0.730455	0.10471	0.430714	1.44	0.98	1.34	0.9	2.2	1.54	1.2	0.84	1	1.2	1.35	0.51
mml-miR-363-3p	-0.36422	4.0837	0.105602	0.430714	12.49	16.03	17.65	13.76	5.46	14.84	10.76	25.15	17.93	13.12	13.68	10.25
mml-miR-937	0.55497	0.798591	0.107812	0.434842	1.5	1.04	1.22	1.58	1.89	1	1.84	0.73	1.8	1.09	0.87	0.72
mml-miR-376a-3p	-0.330578	3.99	0.111741	0.445736	12.03	15.09	23.25	7.89	9.45	8.51	11.04	25.05	8.72	10.93	19.08	11.68
mml-miR-196a-5p	-0.294898	7.95619	0.113471	0.447717	196.16	226.82	290.88	229.39	154.86	279.46	26.21	376.34	281.74	144.72	278.09	53.19
mml-miR-224-5p	-1.26455	0.44354	0.115087	0.44797	0.88	1.04	0.12	4.06	0.1	0	0.09	0.1	2	1.86	1.25	0
mml-let-7g-5p	-0.267524	11.8756	0.117232	0.44797	2897.95	3452.91	2380.33	2844.84	1620.4	6609.56	1034.61	4177.2	3270.19	1435.32	6919.2	1462.66
mml-miR-376a-1-5p	-0.547238	0.753102	0.117237	0.44797	1.01	1.48	1.95	0.68	0.52	1	0.92	2.31	0.8	1.64	1.73	0.92
mml-miR-106b-5p	0.286794	6.08142	0.121494	0.451049	63.31	51.68	66.33	37.78	45.36	121.54	45.53	72.1	39.08	36.51	81.71	29.01
mml-miR-148a-3p	0.228915	9.4951	0.123188	0.451049	660.82	578.47	805.09	478.41	684.53	561.18	774.87	815.46	421.41	398.97	661.01	595.48
mml-miR-654-3p	-0.25026	8.03348	0.123538	0.451049	215.08	244.86	584.19	112.89	135.12	127.69	115.52	590.35	114.62	183.2	211.5	124.63
mml-miR-331-5p	0.290597	5.28921	0.12482	0.451049	36.82	29.42	24.95	31.35	57.43	34.57	35.78	27.56	25.85	30.28	27.65	35.77
mml-miR-192-3p	-0.423036	1.57442	0.12517	0.451049	1.98	2.71	2.31	1.35	2.41	1.54	2.3	4.3	2.3	2.4	2.41	2.15
mml-miR-101-3p	0.257863	9.0244	0.125692	0.451049	474.56	411.62	420.74	465.21	560.75	687.16	238.95	590.77	415.3	393.29	496.82	161.94
mml-miR-628-3p	-0.306947	3.19365	0.126741	0.451049	6.69	8.47	7.55	6.77	4.93	8.24	5.98	10.38	8.32	6.23	11.27	6.15
mml-miR-26a-1-3p	-0.370949	2.5684	0.134428	0.465259	4.39	5.43	8.15	3.61	3.15	2.71	4.32	7.02	4.41	5.79	5.01	4.92
mml-miR-92b-3p	0.301252	7.95013	0.136591	0.465259	225.36	197.99	206.54	145.48	294.07	244.71	236	162.23	112.92	355.58	117.75	241.47
mml-miR-190a-5p	0.316955	5.01928	0.138017	0.465259	31.13	25.84	44.18	4.51	75.8	11.58	19.59	60.68	3.91	41.86	8.19	14.55
mml-miR-431	0.337756	4.36885	0.139067	0.465259	19	16.45	34.44	9.36	15.22	22.35	13.61	40.56	10.52	9.29	10.41	11.48
mml-miR-23a-3p	-0.196435	11.3917	0.139741	0.465259	2151.48	2455.57	3124.44	1863.44	1632.58	1605.17	2531.74	3408.06	2214.26	2057.72	1904.11	2693.69
mml-miR-505-3p	-0.289424	6.05564	0.140869	0.465259	50.16	62.9	76.8	54.92	37.38	30.95	50.77	69.59	61.42	43.4	37	103.11
mml-miR-4766-3p	-0.264299	4.74951	0.141212	0.465259	20.76	24.93	22.03	13.2	21.73	14.66	32.19	20.86	16.73	33.99	19.56	33.51
mml-miR-181d	0.62497	0.364378	0.141233	0.465259	1.07	0.7	0.49	1.13	1.57	1.45	0.74	1.15	0.4	0.55	0.77	0.61
mml-miR-22	0.253076	10.3967	0.142269	0.465259	1253.88	1072.13	1513.3	669.11	1481.5	1175.58	1429.91	1686.05	830.4	1278.35	846.88	718.98
mml-let-7a-3p	-0.288955	6.81467	0.146196	0.473833	87.35	105.82	123.78	73.19	96.17	36.38	107.24	99.14	81.26	168.88	58.78	121.04
mml-miR-107-3p	0.307784	7.85918	0.149863	0.481418	224.89	174.8	202.52	119.88	390.35	207.51	204.18	247.44	142.37	166.26	187.99	129.96
mml-miR-20a-5p	0.284696	6.55718	0.154966	0.493445	88.76	71.24	84.46	51.09	70.66	190.59	47	98.62	48.99	67.11	112.35	29.11
mml-miR-7204-3p	0.24493	6.35415	0.156326	0.493445	76.24	63.65	82.64	60.45	100.05	43.35	94.73	60.58	59.21	90.4	44.81	63.24
mml-miR-29a-3p	-0.228076	7.46005	0.158886	0.497205	138.76	161.05	181.34	140.97	70.87	105.52	195.08	218.83	165.52	91.16	131.33	198.42
mml-miR-374a-5p	-0.298612	6.07441	0.160916	0.497716	51.88	62.47	60.12	54.25	28.66	89.32	27.04	93.48	54.71	58.81	75.83	29.52
mml-miR-1255a-3p	-0.296649	3.19855	0.162609	0.497716	6.74	8.57	6.69	5.08	8.08	7.33	6.53	8.28	4.51	11.37	10.89	7.79
mml-miR-30c-1-3p	0.281078	5.06589	0.163163	0.497716	31.68	25.09	24.46	28.87	53.75	21.9	29.43	26.72	29.06	24.05	20.72	24.91
mml-miR-30d-5p	-0.239578	13.1323	0.165293	0.498508	7083.78	8290.36	8629.95	6704.23	7144.19	4610.99	8329.55	9812.19	7282.91	8348.71	7457.83	8550.17
mml-miR-590-3p	-0.477985	1.6727	0.166169	0.498508	2.19	2.78	1.58	3.72	0.84	4.43	0.37	4.09	2.71	1.75	4.43	0.92
mml-miR-92b-5p	0.372758	1.59754	0.169205	0.503007	2.66	2.05	1.58	1.58	3.67	3.44	3.04	1.26	1.5	2.4	2.41	2.66
mml-miR-324-5p	-0.232092	7.82172	0.171435	0.503007	178.74	207.74	142.88	134.66	241.05	128.6	246.49	152.8	158.81	259.39	232.8	234.91
mml-miR-103-3p	0.289481	12.4147	0.171826	0.503007	5148.8	4231.79	4785.85	3094.87	7712.71	5917.97	4232.6	6353.3	3543.11	3306.67	5085.91	2869.97
mml-miR-7180-5p	0.258785	6.92405	0.174417	0.504826	110.05	96.62	79.11	78.83	120.11	93.58	178.61	64.35	65.93	144.61	57.24	150.97
mml-miR-148a-5p	0.339064	3.36181	0.176612	0.504826	9.61	7.61	11.32	5.53	6.4	8.33	16.46	10.06	4.21	9.73	4.53	9.53
mml-miR-376b-5p	-0.512174	0.994058	0.177491	0.504826	1.32	1.73	3.29	0.11	0.73	1	1.47	3.46	0.9	1.64	1.83	0.82
mml-miR-1180-3p	0.281779	8.85187	0.17801	0.504826	426.29	348.99	217.37	489.68	458.17	585.43	380.77	242.3	482.03	331.75	238.1	450.76
mml-miR-122a-5p	-0.404641	5.70835	0.193106	0.534362	42.44	42.7	5.6	113.68	11.97	67.33	13.61	10.38	81.76	49.3	57.91	14.14
mml-miR-369-5p	-0.271024	3.74742	0.194017	0.534362	10.39	12.49	21.54	5.53	4.41	14.3	6.16	27.14	5.81	7.87	14.36	7.28
mml-miR-30d-3p	-0.289339	3.1987	0.194114	0.534362	6.94	8.42	8.88	4.06	8.92	7.51	5.33	12.05	6.91	7.65	7.71	7.79
mml-miR-382-3p	0.377115	1.35094	0.194313	0.534362	2.25	1.74	4.02	1.35	1.57	1.72	2.58	3.25	1.4	1.09	1.73	1.23
mml-miR-139-5p	-0.47702	1.08224	0.200115	0.539829	1.31	1.87	1.95	1.35	0.42	1.72	1.1	1.05	1.2	1.42	3.85	1.84
mml-miR-33a	0.545538	1.00175	0.200779	0.539829	1.78	1.26	0.61	1.8	4.09	0.9	1.47	1.05	0.1	3.06	1.16	0.92
mml-miR-192-5p	-0.21827	9.02698	0.201202	0.539829	414.91	475.89	415.51	405.1	452.61	217.47	583.85	378.86	407.78	679.68	405.18	507.95
mml-miR-143-3p	-0.396414	1.62221	0.20225	0.539829	2.02	2.78	1.34	3.38	1.47	1.81	2.12	1.36	4.11	4.26	2.41	1.74
mml-miR-98	-0.249859	5.88925	0.208754	0.550219	46.71	52.67	38.46	54.25	23.31	101.27	16.28	63.41	58.21	22.74	92.98	26.03
mml-miR-30e-5p	-0.172748	10.3471	0.209174	0.550219	1050.49	1192.03	1149.03	787.31	1425.54	689.42	1201.17	1383.49	785.51	1689.57	1050.1	1051.46
mml-miR-138-3p	0.306148	3.10574	0.217407	0.567208	7.82	6.39	8.15	10.38	9.03	4.25	7.27	5.76	9.92	3.61	5.49	7.17
mml-let-7e-5p	-0.2345	4.70659	0.220685	0.567208	20.23	23.49	18.99	16.69	12.07	42.9	10.48	26.41	25.75	10.27	40.76	14.25
mml-miR-324-3p	0.193527	7.75737	0.221307	0.567208	196.85	169.15	125.11	237.17	266.67	131.4	223.86	124.61	204.89	202.77	134.13	179.36
mml-miR-32-5p	-0.291356	3.66424	0.222849	0.567208	9.49	11.76	8.88	7.44	9.76	15.48	5.89	12.37	6.41	18.15	12.53	9.33
mml-miR-323b-3p	0.228443	6.35172	0.223445	0.567208	75.63	65.84	155.66	47.48	66.98	59.64	48.38	129.33	50.4	40.99	74.97	33.51
mml-miR-7205-3p	0.216197	5.53275	0.233725	0.589183	42.52	36.01	45.15	45.22	60.05	52.22	9.93	38.67	40.18	56.62	33.53	11.07
mml-miR-223	-0.256033	15.1928	0.24069	0.597341	28653.5	35357.9	37082.3	27006.6	24980.4	25165.1	29033.2	46422.8	32401	21200	33620.6	43145.3
mml-miR-6529-5p	0.189529	8.16884	0.241394	0.597341	256.2	231.41	209.21	208.98	266.57	271.59	324.67	140.12	245.97	224.19	219.21	327.56
mml-miR-627-5p	-0.211375	6.16268	0.243481	0.597341	55.09	66.2	66.45	55.37	43.78	59.55	50.31	63.82	74.14	36.84	90.38	65.8
mml-miR-369-3p	0.472482	0.42996	0.243544	0.597341	1.07	0.82	1.58	0.79	0.63	1.9	0.46	1.99	0.4	0.33	0.87	0.51
mml-miR-532-3p	0.158647	9.80643	0.247257	0.602377	809.36	709.3	719.28	1026.62	1135.46	522.99	642.43	602.09	887.61	776.41	611	669.37
mml-miR-551a	-0.353697	1.95935	0.250131	0.604396	2.53	3.54	0.24	2.37	2.62	7.06	0.37	0.94	2.3	2.95	11.27	0.2
mml-miR-1304	0.202858	5.63308	0.251415	0.604396	44.46	39.69	54.77	46.58	50.18	42.9	27.87	51.25	54.61	31.7	36.81	24.09
mml-miR-17-5p	0.177929	8.14338	0.253251	0.604802	250.5	231.87	320.7	187.78	188.14	406.07	149.82	323.31	211.01	137.18	378.59	109.26
mml-miR-19a-3p	0.215385	7.06766	0.257176	0.607513	120.8	108.2	115.13	97.1	150.13	129.32	112.3	118.22	101.09	150.74	111.48	59.45
mml-miR-370-3p	0.231632	4.7355	0.257733	0.607513	23.52	21.8	38.95	22.56	17.53	27.24	11.31	44.12	23.14	8.2	22.26	11.27
mml-miR-372-3p	0.345084	2.231	0.260655	0.610436	4.24	3.37	6.21	0.45	1.15	8.78	4.6	7.65	0.3	1.31	4.63	2.97
mml-miR-1296-5p	-0.203107	7.20748	0.264866	0.614304	115.3	132.89	123.65	206.5	77.38	61.45	107.52	138.23	211.81	114.23	57.72	142.46
mml-miR-760	-0.405078	0.430279	0.265691	0.614304	0.79	1.07	0.73	0.9	0.31	0.9	1.1	1.26	1.2	0.33	1.35	1.23
mml-let-7a-5p	-0.245353	14.6117	0.270848	0.619136	19533.7	22738.7	15958.7	18146.5	12580.8	42795	8187.36	24617.9	24297.5	9848.74	42515.2	12414.3
mml-miR-371-5p	0.340049	1.39227	0.271192	0.619136	2.21	1.92	4.62	0.34	1.36	2.9	1.84	4.93	0.2	0.66	2.7	1.13
mml-miR-550-5p	-0.39279	0.94256	0.279263	0.633577	1.22	1.62	0.61	0.79	1.68	1.45	1.56	1.47	2.4	1.42	1.35	1.43
mml-miR-6827-3p	0.19857	4.38455	0.282239	0.633685	18.81	16.68	24.22	13.53	22.36	18.46	15.45	20.54	13.33	23.5	12.62	13.43
mml-miR-93-3p	0.155322	10.9012	0.282801	0.633685	1703.54	1581.74	1568.67	1220.94	2489.19	1046.71	2192.18	1382.97	1212.43	2931.74	940.73	1440.83
mml-miR-423-5p	0.168293	12.1937	0.285903	0.636704	4142.36	3747.51	2675.96	5012.21	4418.99	3720.57	4884.05	2758.18	5448.28	2865.5	3452.27	4213.33
mml-miR-21-3p	0.363254	1.05786	0.295875	0.64027	1.74	1.4	1.58	1.58	1.89	1.36	2.3	2.1	1.4	1.75	1.16	0.61
mml-miR-130b-5p	0.1952	6.16815	0.297454	0.64027	64.58	57.28	51.48	50.75	67.4	71.77	81.49	44.75	53	73.67	43.55	71.44
mml-miR-30b-5p	-0.190588	10.5661	0.299037	0.64027	1230.67	1376.84	1933.91	984.67	1025.85	816.84	1392.11	1429.18	973.67	1720.07	1531.69	1229.59
mml-miR-10a-5p	-0.188181	6.04295	0.299564	0.64027	53.14	59.48	80.69	51.43	34.54	40.54	58.49	81.96	52.9	56.73	52.42	53.4
mml-miR-331-3p	-0.152284	11.6916	0.300997	0.64027	2677.81	2933.63	2383.62	3509.67	3073.87	1336.3	3085.61	2396.72	3406.05	3805.11	1929.74	3130.51
mml-miR-636	0.190349	4.66534	0.302578	0.64027	22.22	20.41	14.24	22.44	27.61	18.01	28.79	12.16	19.74	27.22	11.76	31.16
mml-miR-365-3p	-0.24802	3.74157	0.303112	0.64027	10.79	11.6	10.95	5.86	5.04	10.23	21.89	13.73	9.72	8.64	13.01	12.91
mml-miR-30c-5p	-0.211233	13.5107	0.303257	0.64027	9354.23	10642.7	12952.8	8206.21	8072.51	6353.09	11186.5	10327.1	8660.06	11973.2	11350.5	10902.8
mml-miR-3200-3p	-0.175859	7.60545	0.305573	0.64027	153.8	176.55	149.82	172.21	167.25	83.89	195.81	151.54	190.17	144.07	116.98	280.01
mml-miR-1226	0.16479	8.22922	0.307238	0.64027	265.08	240.73	199.6	360.89	316.86	201.27	246.76	135.93	296.47	267.91	212.37	290.97
mml-miR-656-3p	-0.423339	0.326729	0.308019	0.64027	0.74	0.98	1.1	0.56	0.31	1.27	0.46	1.36	1.1	0.66	0.67	1.13
mml-miR-150-3p	0.281258	1.77946	0.30867	0.64027	2.94	2.48	2.31	3.83	3.36	2.53	2.67	2.93	3.51	1.86	1.54	2.56
mml-miR-149-5p	-0.324437	1.0358	0.311053	0.641547	1.35	1.71	1.22	2.82	0.52	1.09	1.1	1.15	3.61	1.09	1.35	1.33
mml-miR-542-5p	-0.320049	1.95833	0.313541	0.642077	2.73	3.44	1.22	2.82	3.57	2.9	3.13	3.88	2.91	1.86	3.85	4.71
mml-miR-582-3p	-0.247222	2.81611	0.314848	0.642077	5.62	6.14	13.02	5.41	0.21	2.08	7.36	12.68	6.41	0.66	3.47	7.48
mml-miR-424-3p	0.207734	4.8999	0.320265	0.649477	27.39	22.87	14.36	15.56	36.75	37.65	32.65	16.35	19.14	19.13	26.11	33.62
mml-miR-454-3p	-0.14892	8.46734	0.323582	0.652556	281.98	319.39	318.38	252.51	199.16	520.82	119.01	409.99	302.68	166.91	570.72	146.67
mml-miR-889-3p	-0.294061	1.40636	0.329707	0.661235	1.88	2.35	5.11	1.58	0.52	1.18	1.01	6.5	1.6	1.2	1.73	0.72
mml-miR-500b-3p	-0.333018	0.772812	0.332108	0.662392	1.11	1.38	0.61	0.79	1.68	0.63	1.84	0.94	1.7	1.42	0.87	1.95
mml-miR-18b	0.197761	4.34041	0.337401	0.669271	18.05	16.12	15.7	12.63	19.95	26.15	15.82	21.59	12.72	16.94	20.23	9.12
mml-miR-127-3p	0.241931	1.99549	0.342501	0.675694	3.51	3.02	7.18	2.37	3.36	2.71	1.93	6.29	1.8	2.19	3.28	1.54
mml-miR-183-5p	-0.23705	2.4358	0.34462	0.676201	4.03	4.69	3.41	5.86	2.52	6.61	1.75	5.14	4.91	2.95	7.8	2.66
mml-miR-148b-3p	-0.118395	9.27408	0.352357	0.683688	505.33	548.47	451.9	370.59	425.84	541.63	736.7	468.57	453.97	454.83	627.86	737.12
mml-miR-502-3p	0.180851	4.87056	0.354124	0.683688	26.57	23.17	23.37	17.48	32.65	20.63	38.72	29.24	19.94	27.76	16.77	22.14
mml-miR-432-5p	0.215903	5.00294	0.355128	0.683688	29.13	25.01	36.76	25.6	24.67	47.96	10.67	34.79	25.95	10.27	37	17.01
mml-miR-34a-5p	-0.212	6.13413	0.356037	0.683688	52.61	66.44	50.14	49.96	30.34	80.54	52.06	113.08	65.73	21.32	68.32	63.75
mml-miR-199a-5p	-0.22272	3.55164	0.357885	0.683688	8.62	11	7.18	7.78	10.81	8.96	8.37	8.7	8.62	19.02	13.97	4.71
mml-miR-493-5p	-0.318937	2.21349	0.359737	0.683688	3.5	4	5.48	2.93	0.94	7.69	0.46	9.01	3.91	0.87	4.24	1.95
mml-miR-29c-3p	0.141586	8.7133	0.363072	0.686433	368.98	346.76	327.75	290.63	390.56	546.25	289.72	424.45	252.99	275.67	548.66	232.04
mml-miR-421	-0.155592	6.36506	0.366284	0.687151	66.24	73.91	73.02	54.36	54.59	60.45	88.75	68.33	66.53	60.23	89.71	84.76
mml-miR-1240	0.193786	4.04153	0.367238	0.687151	14.76	12.76	12.17	18.83	20.68	7.78	14.35	7.34	17.03	14.21	12.62	12.61
mml-miR-4766-5p	0.250926	2.25188	0.376375	0.688313	4.13	3.57	4.02	2.71	4.83	5.25	3.86	5.55	3.51	2.08	3.76	2.97
mml-miR-329-3p	0.198268	3.11562	0.376936	0.688313	7.59	7.09	16.92	4.51	4.3	6.24	5.98	17.19	4.31	2.4	7.13	4.41
mml-miR-487b-5p	-0.233052	1.85208	0.377166	0.688313	2.7	3.11	5.36	2.71	1.36	2.9	1.2	5.66	2.81	1.75	3.18	2.15
mml-miR-942-5p	-0.136388	11.3042	0.377894	0.688313	2007.2	2290.19	1686.48	1831.3	2072.38	2079.93	2365.92	1600.12	1997.14	2988.58	1802.74	3062.35
mml-miR-195-5p	-0.318275	0.521866	0.378797	0.688313	0.92	1.14	1.7	0.9	0.52	0.81	0.64	1.78	0.8	0.87	1.54	0.72
mml-miR-411-5p	-0.306259	0.804666	0.379236	0.688313	1.19	1.46	3.29	0.45	0.73	1	0.46	3.77	0.5	1.09	1.54	0.41
mml-miR-409-5p	0.181936	3.47887	0.383901	0.6895	9.89	9.19	21.54	4.29	7.45	7.33	8.83	22.53	4.01	5.68	7.9	5.84
mml-miR-1185-3p	-0.313058	0.793669	0.385148	0.6895	1.14	1.44	2.56	0.56	0.42	1.45	0.74	3.35	1	1.09	1.16	0.61
mml-miR-135a-5p	-0.283211	1.40265	0.387338	0.6895	1.82	2.28	1.95	0.45	1.57	2.71	2.39	1.89	0.5	3.61	1.93	3.48
mml-miR-503-5p	-0.155788	6.93687	0.387487	0.6895	97.29	110.38	69.01	63.49	93.86	157.65	102.46	87.3	83.06	70.18	186.55	124.83
mml-miR-106a-5p	0.16093	5.73517	0.390528	0.691156	46.3	43.86	51.97	34.96	29.5	84.07	30.99	57.54	42.48	23.17	77.47	18.65
mml-miR-542-3p	-0.330707	0.861666	0.393238	0.691156	1.17	1.48	0.49	0.68	1.57	1.63	1.47	1.78	1.6	0.98	2.12	0.92
mml-miR-20b-5p	-0.160483	4.20693	0.394131	0.691156	14.22	16.9	21.18	13.76	6.82	23.17	6.16	28.93	16.73	7.43	26.31	5.12
mml-miR-6505-5p	0.306181	0.867513	0.403451	0.7041	1.49	1.22	2.19	1.13	1.68	1.27	1.2	0.84	1.9	0.77	1.45	1.13
mml-miR-628-5p	-0.247396	1.851	0.40851	0.708163	2.61	3.08	3.04	2.48	1.05	4.8	1.66	3.56	3.11	0.87	3.95	3.89
mml-miR-199a-3p	-0.201588	4.63795	0.409681	0.708163	19.83	21.48	17.65	40.94	7.98	26.88	5.7	24.1	31.06	19.89	27.75	4.61
mml-miR-496	-0.327612	0.415112	0.413271	0.70881	0.86	1.04	2.19	0.23	0.31	0.81	0.74	1.89	0.5	0.55	1.73	0.51
mml-miR-16-5p	-0.195596	16.5803	0.413961	0.70881	76405.5	90485.8	100594	73524	41935.5	131830	34143.3	129075	83443.5	37911.8	157355	44644.1
mml-miR-3200-5p	0.280663	1.94253	0.421869	0.71666	3.36	2.75	3.53	0.9	3.67	3.89	4.78	1.47	3.01	1.86	2.6	4.82
mml-miR-125b-5p	-0.110138	9.33353	0.422494	0.71666	505.5	589.7	395.91	382.88	474.24	914.94	359.52	331.28	392.35	560.64	1276.92	387.32
mml-miR-598-3p	0.225542	1.80373	0.430369	0.726623	3.08	2.52	4.14	1.69	3.78	1.54	4.23	3.04	1.7	2.3	2.79	2.77
mml-miR-191-3p	0.141428	6.51868	0.441424	0.737774	82.41	73.46	110.75	108.61	88.93	37.65	66.13	99.04	96.29	55.64	45.19	71.13
mml-miR-342-3p	0.121832	9.98541	0.443406	0.737774	911.62	802.89	1093.53	1219.59	466.36	544.17	1234.46	886.42	1165.54	617.37	610.04	735.07
mml-miR-330-3p	-0.227035	1.6879	0.444896	0.737774	2.35	2.69	2.19	2.14	1.47	1.72	4.23	1.89	3.61	2.3	2.89	2.77
mml-miR-382-5p	0.16943	5.36449	0.445103	0.737774	36.68	33.91	62.56	18.27	26.14	63.53	12.88	69.27	25.35	11.37	49.62	13.94
mml-miR-221-5p	0.172629	2.9658	0.449577	0.738959	6.9	6.07	8.4	4.06	7.98	6.52	7.54	7.13	6.31	5.47	5.59	5.84
mml-miR-3122	0.143159	3.68854	0.452131	0.738959	11.26	10.29	11.68	9.7	11.02	11.4	12.51	9.64	10.32	10.49	11.76	9.22
mml-miR-204-5p	0.13888	4.8368	0.455669	0.738959	26.89	23.11	59.03	9.36	43.36	5.52	17.2	39.93	9.82	45.91	6.36	13.53
mml-miR-29c-5p	-0.133462	6.13839	0.45693	0.738959	56.56	63.53	54.04	51.65	64.46	40	72.66	56.7	44.08	93.35	50.88	72.67
mml-miR-4677-5p	-0.256523	0.959078	0.457363	0.738959	1.33	1.63	2.19	0.68	1.68	0.9	1.2	1.57	1	3.28	1.25	1.02
mml-miR-505-5p	-0.171432	2.52934	0.458032	0.738959	4.44	5.03	5.72	3.95	4.3	3.08	5.15	5.45	4.01	4.59	3.95	7.17
mml-miR-493-3p	0.225154	1.77245	0.46025	0.739251	2.83	2.67	5.48	1.69	1.89	4.16	0.92	7.13	1.9	1.2	2.41	0.72
mml-miR-205	0.205068	1.47334	0.466244	0.74558	2.29	2.02	1.95	1.92	2.2	2.53	2.85	2.41	1.9	2.4	1.64	1.74
mml-miR-330-5p	-0.150271	3.37851	0.471559	0.750542	8.14	9.19	6.57	5.41	9.24	8.51	10.94	7.13	6.51	13.01	7.52	11.79
mml-miR-186-3p	-0.270864	0.431769	0.473951	0.750542	0.85	1.05	0.85	0.56	1.36	0.72	0.74	1.78	1	1.09	0.58	0.82
mml-miR-487b-3p	-0.14683	3.41331	0.479203	0.750542	8.64	9.57	21.3	4.85	5.77	6.43	4.87	22.43	5.21	5.14	9.54	5.53
mml-miR-671-3p	0.11012	7.99427	0.484807	0.750542	221.92	212.91	191.08	213.49	296.17	160.36	248.51	174.6	176.54	330.66	136.25	246.49
mml-miR-15b-3p	-0.123022	11.5225	0.485021	0.750542	2550.27	2529.75	2772.22	1745.92	4772.8	993.76	2466.63	3118.28	1959.27	3045.86	1734.91	2790.44
mml-miR-7172-5p	-0.199612	2.04026	0.485242	0.750542	3.1	3.46	1.34	1.58	3.25	3.35	5.98	2.72	2.3	4.7	2.22	5.33
mml-miR-20a-3p	0.236919	2.5416	0.485519	0.750542	5.23	4.4	3.89	2.48	11.02	3.98	4.78	8.49	3.31	4.48	3.57	2.15
mml-miR-99a-5p	-0.122707	5.12427	0.487979	0.750542	28.15	30.43	16.55	15.68	19.95	56.56	32.01	15.09	17.73	29.29	55.6	34.44
mml-miR-668	-0.266475	0.461838	0.489491	0.750542	0.86	1.11	1.58	0.9	0.73	0.81	0.28	2.83	0.9	0.55	0.67	0.61
mml-miR-6827-5p	0.273046	0.593734	0.490023	0.750542	1.13	1.01	0.97	1.35	1.15	1.54	0.64	1.15	1.8	0.11	1.25	0.72
mml-miR-19b	-0.135601	12.2822	0.498491	0.758086	4126.47	4412.91	4349.66	3125.2	4572.48	2446.63	6138.38	3975.24	3783.78	5891.03	4648.45	3766.06
mml-miR-10b-5p	-0.2304	2.49768	0.500092	0.758086	4.08	5.22	5.11	2.82	3.15	2.35	6.99	3.88	3.21	11.7	2.7	4.61
mml-miR-425	0.137825	14.4515	0.50241	0.758086	19924.5	18491.9	17651.5	12294.7	24454.2	16699.3	28523	14789.4	12333.6	30214.1	14263.7	20858.7
mml-miR-486-5p	0.174908	17.5051	0.506932	0.758086	165053	149851	130147	204754	186176	139547	164642	112202	160611	200992	105243	170210
mml-miR-151-5p	-0.117942	6.53624	0.507396	0.758086	75.66	82.19	85.68	79.85	92.39	56.38	64.01	84.68	96.18	79.14	87.01	63.95
mml-miR-485-5p	0.231454	1.78581	0.507479	0.758086	2.85	2.6	3.16	1.8	2.2	4.98	2.12	5.14	2.61	0.77	2.22	2.25
mml-miR-503-3p	-0.112349	5.70875	0.511323	0.760698	42.22	46.29	32.86	31.8	44.41	60.63	41.39	38.99	34.27	37.27	68.03	52.89
mml-miR-188-5p	0.183977	1.67282	0.516859	0.76489	2.71	2.34	2.19	2.14	3.88	1.27	4.05	1.99	1.8	3.94	1.83	2.15
mml-miR-4677-3p	0.176311	2.04015	0.518355	0.76489	3.52	3.11	3.53	3.83	4.2	1.9	4.14	2.83	2.81	4.48	3.18	2.25
mml-miR-7186-5p	0.111223	5.61519	0.520497	0.764941	43.08	40.3	44.06	32.93	45.67	54.84	37.89	49.99	32.56	45.47	41.92	31.57
mml-miR-423-3p	0.116488	12.7853	0.531103	0.770934	6086.9	5885.03	4344.91	6358.56	6806.44	5495.61	7428.95	4258.63	5606.88	8118.62	3423.08	8017.93
mml-miR-125a-5p	-0.0908684	8.73998	0.532103	0.770934	353.48	376.09	442.77	360.55	388.56	257.38	318.14	355.7	396.66	458	336.67	333.41
mml-miR-25	-0.139628	15.9241	0.533947	0.770934	50141.4	55819.4	57427.3	46154.8	45865.9	56556.8	44702.3	57955.2	49912	45945.6	64965.7	60318.6
mml-miR-185-5p	0.0885162	11.5633	0.534421	0.770934	2631.13	2497.61	1978.21	2465.9	2762.37	2552.24	3396.94	2014.4	2807.3	2088.65	2358.72	3218.96
mml-miR-92a-3p	0.159317	16.9635	0.537931	0.770934	112742	103653	90485.8	119017	112228	119693	122288	79153.1	106660	120975	77320.2	134155
mml-let-7g-3p	-0.172036	1.98023	0.539695	0.770934	3.02	3.33	2.43	1.35	4.93	2.17	4.23	3.98	2.2	5.14	2.89	2.46
mml-miR-1306-5p	0.102295	8.10863	0.54095	0.770934	241.55	221.25	174.04	405.78	270.98	158.37	198.57	156.15	336.35	182.65	192.91	238.19
mml-miR-187-5p	0.104472	5.85971	0.541565	0.770934	51.64	47.71	107.1	53.34	15.01	31.76	50.95	87.72	51.9	11.91	35.75	51.25
mml-miR-215-5p	0.234985	0.355666	0.556966	0.789761	0.95	0.82	0.97	1.02	0.94	0.54	1.29	0.21	0.9	1.09	1.06	0.82
mml-miR-140-3p	-0.113108	13.2325	0.559658	0.79049	8056.34	8444.98	10211	6692.39	8469.68	4593.7	10314.9	8794.04	7854.61	9377.95	8052.26	8146.04
mml-miR-7	0.0854494	10.654	0.565679	0.790642	1386.5	1360.99	1718.98	1131.28	1095.98	2208.07	778.18	1868.93	1261.33	662.51	2183.74	828.44
mml-miR-499-5p	0.183007	1.13158	0.565684	0.790642	1.76	1.57	0.97	2.26	2.94	1.54	1.1	1.78	1.8	2.3	1.35	0.61
mml-miR-550-3p	-0.13686	2.36536	0.566447	0.790642	3.97	4.39	3.29	4.17	3.78	3.17	5.43	4.09	4.31	5.25	3.28	5.02
mml-miR-337-5p	0.15323	2.16781	0.568478	0.790642	3.7	3.68	7.42	1.8	2.73	4.43	2.12	9.01	1.9	1.2	4.53	1.74
mml-miR-134-5p	0.116255	4.95149	0.577855	0.800616	27.35	25.64	51.73	18.16	21.63	33.21	12.05	48.1	20.84	10.38	32.47	16.4
mml-miR-140-5p	-0.100208	6.02252	0.580508	0.801234	53.2	58.15	51.6	43.08	78.11	49.23	43.96	81.22	38.47	70.5	52.9	47.66
mml-miR-21-5p	-0.0870282	8.69408	0.584899	0.803192	341.21	366.95	347.47	261.87	324.63	465.25	306.82	503.26	265.21	372.41	373.58	320.29
mml-let-7c-5p	0.113056	7.05911	0.587279	0.803192	118.33	105.96	68.89	97.22	101.73	260.91	62.91	96.31	104.5	55.42	204.47	69.08
mml-miR-7180-3p	0.108684	4.50534	0.588565	0.803192	19.88	18.17	10.59	17.59	24.15	22.53	24.56	15.2	17.63	14.32	21.58	22.14
mml-miR-99b-5p	-0.101101	5.86263	0.598107	0.812201	48.95	50.87	69.86	32.93	53.86	30.14	57.94	61.52	40.08	49.52	54.06	49.2
mml-let-7i-3p	0.0987171	4.75253	0.599642	0.812201	24.13	21.6	17.28	19.96	43.15	17.56	22.72	21.48	19.44	27.44	20.91	18.76
mml-miR-7194-5p	0.193158	0.467687	0.604446	0.813698	1.03	0.89	0.85	0.9	0.73	0.54	2.12	0.73	1.3	0.33	0.67	1.43
mml-miR-15b-5p	-0.0899147	13.3181	0.605312	0.813698	8327.53	8985.52	10765	9386.66	4781.83	9958.91	6745.22	11156.6	11652.6	4778.17	9519.58	7820.63
mml-miR-3146	-0.141464	1.69534	0.607472	0.813698	2.42	2.69	3.16	1.47	1.99	2.26	3.22	2.2	2	1.86	3.47	3.89
mml-miR-339-3p	0.0714104	9.72713	0.610466	0.814703	762.62	698.55	675.23	408.93	1191.42	467.24	1070.29	715.48	407.58	1019.73	606.37	743.58
mml-miR-379-5p	-0.117691	3.25778	0.618286	0.822117	7.37	8.79	15.58	4.29	2.83	12.58	1.56	22.95	5.21	2.51	11.85	1.43
mml-miR-299-5p	-0.0819616	6.57783	0.630704	0.835567	81.97	84.61	190.11	42.18	69.61	56.29	51.69	179.11	51.2	78.81	68.03	45.92
mml-miR-532-5p	0.0917512	7.02395	0.638826	0.843251	116.44	106.84	116.35	98.12	187.41	69.68	110.64	146.51	99.99	114.77	91.54	81.38
mml-miR-7195-3p	0.160673	0.771228	0.646484	0.847899	1.35	1.18	0.49	0.45	3.78	0.81	1.2	0.52	0.5	3.17	0.77	0.92
mml-miR-933	-0.153311	1.66412	0.647019	0.847899	2.25	2.69	0.49	0.56	3.46	2.99	3.77	0.94	0.1	4.15	5.59	2.66
mml-miR-337-3p	-0.103043	3.00714	0.65167	0.84979	6.72	6.94	16.92	4.06	4.62	4.62	3.4	14.88	3.21	5.47	7.13	4
mml-miR-6505-3p	-0.112078	2.21888	0.653145	0.84979	3.58	3.98	3.53	3.61	3.99	2.9	3.86	3.77	2.91	5.9	2.89	4.41
mml-miR-5697-3p	-0.128385	1.32546	0.656481	0.85108	1.85	2.02	2.68	1.58	1.36	2.44	1.2	2.31	1.3	2.08	2.79	1.64
mml-miR-361-3p	0.0646878	11.9517	0.676311	0.871001	3436.27	3301.12	2628.73	3578.91	5259.43	2732.69	2981.59	2172.44	3534.8	4331.32	3805.23	2661.81
mml-miR-182	-0.0693111	4.965	0.680887	0.871001	25.42	27.03	25.44	29.89	22.99	30.77	18.03	21.38	31.56	24.38	36.42	21.42
mml-let-7d	-0.0675833	11.3669	0.681072	0.871001	2238.8	2211.28	1758.17	1859.27	1263.54	5011.72	1301.33	2234.17	2452.32	1087.83	3661.18	1620.91
mml-miR-323a-3p	-0.0672834	5.17252	0.681445	0.871001	30.43	31.39	61.46	23.8	17.53	30.5	18.85	55.96	26.45	17.38	36.04	21.11
mml-miR-152-3p	-0.0848174	3.09015	0.689597	0.875458	6.62	7.39	6.09	4.17	5.04	12.4	5.43	5.45	4.31	5.68	16.19	5.33
mml-miR-185-3p	0.0902433	3.99038	0.689755	0.875458	13.41	12.9	7.18	19.06	12.49	12.85	15.45	10.17	17.03	10.82	7.13	19.37
mml-miR-130a-3p	-0.0800332	3.71488	0.692842	0.876312	10.28	11.61	13.02	8.57	5.88	16.11	7.82	11.42	10.02	4.81	23.61	8.2
mml-miR-200c-3p	-0.0811862	3.91672	0.699158	0.881231	12.47	12.55	9.86	6.88	4.09	38.01	3.49	14.15	7.21	4.48	33.44	3.48
mml-miR-543-5p	0.113587	1.13352	0.702651	0.882569	1.72	1.63	2.8	1.47	1.15	1.9	1.29	2.93	1.4	0.87	1.83	1.13
mml-miR-7189-3p	-0.138082	0.928346	0.711518	0.890625	1.42	1.47	2.19	2.71	0.63	0.36	1.2	2.62	1.2	0.98	0.67	1.84
mml-miR-582-5p	-0.158749	0.312612	0.717382	0.892867	0.8	0.94	1.83	0.79	0	1	0.37	2.52	0.3	0	0.96	0.92
mml-miR-335-3p	-0.0819438	4.65762	0.718229	0.892867	21.37	21.39	14.97	8.23	13.96	12.22	57.48	15.2	7.82	29.73	11.18	43.05
mml-miR-500a-5p	0.0810151	3.91404	0.722291	0.894271	12.92	12.48	11.68	7.67	14.28	13.48	17.47	13.62	9.32	19.02	7.71	12.71
mml-miR-181a-3p	0.0649414	4.05974	0.724286	0.894271	14.61	13.65	17.53	10.49	16.06	6.97	21.98	15.62	10.12	16.83	8.38	17.32
mml-miR-1255a-5p	-0.122286	0.860535	0.731603	0.899647	1.25	1.42	1.1	1.69	0.63	1.18	1.66	0.73	1.4	1.31	0.87	2.77
mml-miR-155	0.0595674	7.68274	0.733596	0.899647	175.55	172.74	212.62	158.45	116.01	285.07	105.59	228.68	219.42	90.73	229.14	95.73
mml-miR-376c-3p	0.0828177	2.87385	0.73866	0.899982	6.29	5.99	10.1	1.69	6.4	6.43	6.81	11.84	3.11	3.72	6.36	4.92
mml-miR-199a	-0.0823192	3.8111	0.738828	0.899982	10.88	12.71	10.83	11.39	11.65	11.04	9.47	9.96	7.82	21.75	17.25	6.76
mml-miR-7184-3p	-0.111111	0.786688	0.749957	0.910483	1.22	1.3	0.97	1.13	1.26	0.36	2.39	0.73	1.9	1.42	0.58	1.84
mml-miR-301a-3p	0.0716215	3.01047	0.757907	0.910759	6.8	6.41	6.69	7.33	5.46	11.95	2.58	7.55	8.92	4.81	8	2.77
mml-miR-6790-3p	0.0567663	4.44748	0.759122	0.910759	18.75	17.99	14.6	18.38	21.52	13.48	25.75	13.52	14.83	22.08	18.5	21.01
mml-miR-130b-3p	-0.0523523	4.99611	0.765035	0.910759	25.8	27.93	28.36	18.27	15.75	47.6	19.04	26.1	24.45	12.35	56.37	20.4
mml-miR-584-3p	-0.0493476	5.23425	0.765662	0.910759	30.73	32.34	18.86	41.84	38.95	17.01	36.97	17.08	45.29	36.07	19.27	43.97
mml-miR-576-5p	0.0578711	5.87393	0.766179	0.910759	49.83	49.69	46	55.37	58.27	28.24	61.25	35.63	50.2	86.03	31.8	44.79
mml-miR-501-3p	0.115839	0.640209	0.766553	0.910759	1.13	1.11	1.1	0.79	1.57	1	1.2	0.42	1.8	1.31	0.48	1.54
mml-miR-146a-5p	-0.0492507	7.58872	0.767748	0.910759	159.49	167.11	173.8	191.05	114.02	145.88	172.73	214.32	190.47	126.03	168.72	136.01
mml-miR-377-3p	-0.0940995	1.38802	0.777018	0.918754	1.97	2.1	2.31	0.45	1.89	2.99	2.21	3.35	1	2.73	1.45	1.95
mml-miR-424-5p	0.0520007	5.89731	0.780027	0.918817	52.71	49.1	41.14	23.68	73.18	56.02	69.53	45.59	30.56	51.92	66	51.45
mml-miR-7194-3p	0.0777091	2.23286	0.785969	0.918817	4.01	3.65	4.99	4.96	5.35	1.45	3.31	2.72	3.51	4.59	2.6	4.82
mml-miR-23b-3p	0.0352843	9.8981	0.786618	0.918817	832.12	803.07	1084.16	690.88	795.71	568.69	1021.18	1002.95	784.41	788.66	665.44	773.92
mml-miR-373	0.07122	2.03297	0.787196	0.918817	3.32	3.24	4.87	0.56	1.15	5.43	4.6	4.93	0.8	0.66	5.49	4.3
mml-miR-339-5p	0.0521844	14.5427	0.797306	0.926548	20772.5	20205.4	20387.3	17310.2	31573.6	12559.5	22031.8	17587.9	14026.7	32844.4	16626.2	19942.1
mml-miR-1255b	-0.0582702	2.55993	0.799961	0.926548	4.66	4.93	4.02	3.5	4.09	6.06	5.61	5.03	4.21	3.5	7.32	4.61
mml-miR-874-3p	-0.0834781	0.743209	0.801989	0.926548	1.17	1.27	0.97	1.8	1.15	1.27	0.64	1.36	2	1.31	1.06	0.61
mml-miR-128a-5p	-0.109522	0.513169	0.804029	0.926548	0.93	1.07	0.61	0.56	0.84	1.54	1.1	1.89	1.3	0.44	0.67	1.02
mml-miR-181c-3p	0.0668233	1.84513	0.811027	0.931655	2.91	2.85	3.16	2.37	3.25	1.81	3.95	3.98	1.1	3.5	2.51	3.18
mml-let-7i-5p	0.0480098	13.0751	0.815919	0.934317	7504.86	7121.82	7862.1	6749.23	4784.98	15803.5	2324.53	10552.2	7321.78	2977.98	11705.3	3051.79
mml-miR-15a-5p	0.0323749	10.6451	0.821292	0.934697	1381.45	1344.9	1551.39	1029.22	869.2	2777.4	680.05	2004.97	1154.92	767.89	2160.03	636.68
mml-miR-24-3p	0.0328607	9.70617	0.821401	0.934697	718.18	713.28	765.53	560.85	807.47	614.85	842.2	1013.23	643.34	586.11	644.63	679.11
mml-miR-605	-0.0717121	1.19043	0.824079	0.934815	1.68	1.8	1.58	2.37	1.26	1.81	1.38	1.57	2	2.51	1.16	1.74
mml-let-7f-3p	-0.0364543	5.35869	0.851321	0.955597	35.66	34.6	50.02	27.63	40.53	11.58	48.56	35	27.85	50.17	19.46	40.48
mml-miR-301a-5p	0.0743299	0.600829	0.85354	0.955597	1.16	1.05	1.46	1.69	1.36	0.27	1.01	1.26	0.6	0.98	0.87	1.54
mml-miR-942-3p	-0.0464477	2.8276	0.853604	0.955597	5.64	5.85	1.58	7.22	6.3	3.17	9.93	1.36	9.72	4.26	5.49	8.4
mml-miR-374a-3p	0.0640365	1.22548	0.858305	0.955597	1.98	1.63	0.97	1.24	5.56	0.81	1.29	1.47	2	2.62	1.25	0.82
mml-miR-299-3p	0.0497954	1.87797	0.865348	0.955597	2.98	3.06	7.79	2.14	1.57	1.63	1.75	8.49	1.4	1.42	2.99	1.02
mml-miR-660-5p	0.0283279	5.4564	0.867418	0.955597	37.91	37	39.8	28.65	50.5	30.41	40.19	43.6	29.36	36.73	37.48	37.82
mml-miR-100-5p	-0.0915653	0.947455	0.869666	0.955597	1.46	1.38	0.97	0.9	0.21	0.45	4.78	0.52	1.4	2.62	0.19	2.15
mml-miR-150-5p	-0.031183	14.5411	0.873322	0.955597	19864.6	20531.2	24065.6	25901.3	16239	13504.5	19612.5	22766.3	29895.1	16804.3	14899.8	18290.6
mml-miR-15a-3p	0.0463854	2.18243	0.875227	0.955597	3.89	3.51	2.43	1.8	7.87	1.81	5.52	3.46	1.9	6.34	3.28	2.56
mml-miR-132-3p	0.0399287	2.79901	0.880613	0.955597	5.8	5.63	5.48	4.74	3.99	6.15	8.65	6.81	5.91	6.34	4.05	5.02
mml-miR-449a-5p	-0.0537253	0.614138	0.88182	0.955597	1.05	1.13	0.85	2.03	0.63	1.63	0.09	1.05	2.4	0.55	1.54	0.1
mml-miR-296-3p	-0.026523	4.1519	0.882667	0.955597	14.61	15.09	16.67	22.56	11.23	7.96	14.62	18.34	22.64	9.29	8.77	16.4
mml-miR-191-5p	-0.037079	16.6229	0.884617	0.955597	84761.3	86920.9	103089	90807.5	81950.2	55815.1	92144.5	78785.5	109184	72208.1	93346.3	81080.7
mml-miR-190b	0.0289879	4.52536	0.891718	0.955597	19.37	19.26	16.19	21.88	19.21	32.31	7.27	25.26	17.53	12.24	32.57	8.71
mml-miR-491-3p	-0.0325292	3.99691	0.892373	0.955597	13.52	13.53	17.77	12.18	15.85	6.06	15.73	12.47	9.72	19.57	13.68	12.2
mml-miR-758-3p	0.0450677	1.31834	0.893289	0.955597	2.03	1.93	5.23	0.45	1.26	1.72	1.47	4.61	1.2	1.86	1.35	0.61
mml-miR-362-3p	0.0542649	0.321911	0.893921	0.955597	0.87	0.86	0.73	0.56	0.84	0.45	1.75	1.05	0.3	1.53	0.29	1.13
mml-miR-196b-5p	-0.0295526	3.21935	0.897265	0.955597	7.62	7.84	9.13	6.77	5.67	13.57	2.94	13	7.31	4.48	10.7	3.69
mml-miR-494-3p	-0.0250627	5.55763	0.89789	0.955597	41.36	40.66	102.72	18.16	28.98	28.42	28.51	85.83	22.64	24.16	48.76	21.93
mml-miR-211	-0.0319525	2.60181	0.89837	0.955597	4.96	5.04	2.8	3.38	8.92	2.81	6.9	3.88	3.01	10.06	3.95	4.3
mml-miR-660-3p	-0.031836	2.13069	0.902278	0.955597	3.45	3.63	3.53	3.16	3.78	2.08	4.69	2.72	3.41	6.12	2.02	3.89
mml-miR-146b-5p	-0.0355753	2.46648	0.905449	0.955597	4.59	4.4	5.6	2.93	1.36	5.34	7.73	4.4	3.01	4.37	3.85	6.35
mml-miR-1271-5p	0.0200635	7.30114	0.905563	0.955597	136	137.06	200.69	79.62	204.73	91.77	103.19	170.93	85.26	245.51	94.43	89.17
mml-miR-1241	-0.0429693	0.473207	0.905946	0.955597	0.96	0.99	0.37	1.24	1.36	0.81	1.01	0.52	0.8	1.2	0.96	1.43
mml-miR-502-5p	0.0334717	1.33104	0.908212	0.955597	1.94	1.95	2.07	1.47	1.89	1.63	2.67	2.41	1.4	2.62	1.06	2.25
mml-miR-194-3p	0.0348916	0.749451	0.922667	0.968	1.24	1.23	1.46	1.02	1.78	0.9	1.01	0.42	1.7	1.75	1.25	1.02
mml-miR-31-5p	0.0302814	1.03127	0.930014	0.970267	1.48	1.63	2.31	0.9	1.47	1.72	1.01	3.77	1.2	1.53	1.35	0.31
mml-miR-7165-3p	-0.021876	2.40845	0.931708	0.970267	4.39	4.27	6.09	4.62	2.73	1.99	6.53	3.88	4.51	3.83	3.08	6.05
mml-miR-769-5p	0.0201561	2.17702	0.932847	0.970267	3.66	3.66	3.77	3.16	3.88	2.9	4.6	3.46	3.21	5.03	2.79	3.79
mml-miR-362-5p	0.0150986	4.58743	0.936924	0.971724	20.4	20.32	15.46	13.2	25.83	18.64	28.88	20.02	14.63	29.08	13.78	24.09
mml-miR-409-3p	-0.0096147	9.6532	0.946183	0.976442	697.67	699.3	1495.89	477.17	552.56	540.1	422.62	1336.54	552.96	424.88	790.61	391.52
mml-let-7b-3p	-0.0118834	6.00426	0.947993	0.976442	54.67	54.79	58.91	50.98	74.02	19.19	70.27	41.29	49.09	80.56	26.02	76.97
mml-miR-6529-3p	0.0113448	5.04092	0.949543	0.976442	28.2	27.79	30.55	22.56	37.59	17.1	33.2	22.22	25.55	39.9	23.51	27.78
mml-miR-30c-2-3p	-0.016391	1.43381	0.954406	0.97867	2.02	2.16	3.04	2.71	0.63	2.53	1.2	3.46	3.41	0.33	2.6	1.02
mml-miR-28-5p	0.0152814	1.48959	0.962246	0.98393	2.21	2.12	1.58	1.13	1.57	3.53	3.22	2.1	1.9	2.08	1.64	2.87
mml-miR-501-5p	0.0120456	0.614716	0.972714	0.991841	1.09	1.11	1.34	1.02	0.73	1.09	1.29	1.05	0.6	0.98	0.96	1.95
mml-miR-500b-5p	-0.00541688	3.62892	0.978609	0.992737	10.36	10.4	11.08	6.54	10.81	9.59	13.8	10.38	8.52	13.66	8.58	10.86
mml-miR-485-3p	-0.00380444	8.4871	0.979063	0.992737	311.02	304.68	540.5	296.16	261.95	308.96	147.52	458.19	292.36	248.78	350.74	173.31
mml-miR-7172-3p	0.00593345	0.533493	0.986934	0.994175	1.05	1.03	1.7	0.79	0.84	0.36	1.56	1.57	1.1	0.66	0.58	1.23
mml-miR-543-3p	-0.00287424	2.97938	0.989642	0.994175	6.58	6.55	10.83	3.5	3.57	9.32	5.7	11.84	4.51	3.94	6.74	5.74
mml-miR-500a-3p	0.00227301	4.72941	0.990512	0.994175	22.47	22.58	24.46	19.96	29.08	15.11	23.73	31.65	22.14	17.82	18.12	23.16
mml-miR-451	-0.0024896	15.428	0.991436	0.994175	38459.5	37248.4	40375.6	22048.8	33897.1	30349.1	65626.8	40849.4	25372.4	47187	30466.2	42366.8
mml-miR-93-5p	-0.000655235	15.0631	0.997616	0.997616	28077.1	30384.8	36534.5	22726.7	18205.2	50130.8	12788.1	46774.2	25707.9	12264.9	54633.5	12543.5

## Sheet: F. PairedDE_miRNA_Grp4_Grp2
PairedDE_miRNA_Group4_vs_Group2_1
names	logFC	logCPM	PValue	FDR	Group4	Group2	Group4:1	Group4:12	Group4:16	Group4:23	Group4:28	Group2:4	Group2:7	Group2:13	Group2:19	Group2:27
mml-miR-144	-0.746082	6.80629	0.00569312	0.958494	69.41	121.1	86.08	104.79	38.26	66.44	51.49	217.24	115.77	76.77	142.2	53.54
mml-miR-376c-5p	1.01241	1.23483	0.0112852	0.958494	2.52	1.28	1.85	0.76	2.83	3	4.14	0.78	0.67	3.11	1.05	0.81
mml-miR-128a-5p	-0.834786	0.829234	0.027348	0.958494	0.98	1.72	0.33	1.42	1.06	0.66	1.44	1.35	1.84	2.58	1.48	1.35
mml-miR-146b-5p	0.5376	2.6997	0.0401234	0.958494	6.44	4.54	7.19	7.2	5.43	7.98	4.4	2.13	6.6	4.19	6.55	3.24
mml-miR-150-3p	-0.583941	2.02571	0.0417055	0.958494	2.68	4.01	3.16	2.65	2.36	3.19	2.03	2.35	4.68	3.11	5.24	4.68
mml-miR-758-3p	0.660303	1.30891	0.0460614	0.958494	2.52	1.54	2.62	1.14	2.83	4.41	1.61	0.67	1.17	2.25	2.45	1.17
mml-miR-4766-3p	0.44525	4.33477	0.0478835	0.958494	21.25	14.82	15.69	6.44	39.09	20.93	24.09	9.98	6.26	24.7	19.48	13.68
mml-miR-382-3p	0.550161	1.61827	0.0513943	0.958494	3.07	2.04	2.72	1.71	2.72	5.82	2.37	1.79	1.25	2.04	3.58	1.53
mml-miR-204-5p	0.400474	3.42774	0.0556661	0.958494	10.63	7.6	11.55	3.88	10.04	7.79	19.87	9.19	4.26	5.58	6.11	12.87
mml-let-7b-5p	-0.431616	12.8036	0.0591862	0.958494	5406.95	6860.17	4384.44	9463.09	3757.74	5499.55	3929.95	8255.5	7184.97	5717.46	7981	5161.89
mml-miR-379-5p	0.457922	4.08278	0.0607718	0.958494	16.55	12.01	13.18	28.99	10.51	21.21	8.88	13.45	22.47	9.56	8.82	5.76
mml-miR-33b-5p	-0.655835	1.445	0.0669378	0.958494	1.72	2.71	0.98	1.23	2.72	1.88	1.78	4.26	2.09	2.68	2.79	1.71
mml-miR-543-5p	0.628519	1.24482	0.0675771	0.958494	2.37	1.44	1.96	2.27	2.48	3.94	1.18	1.35	1.5	1.5	1.31	1.53
mml-miR-369-5p	0.412279	4.11042	0.0684861	0.958494	17.62	12.5	15.15	16.67	13.94	30.68	11.67	11.99	14.12	11.81	14.67	9.9
mml-miR-7184-3p	-0.824007	0.960568	0.0694843	0.958494	1.14	1.91	0.44	1.89	1.42	1.6	0.34	0.9	1	2.25	3.23	2.16
mml-miR-376a-1-5p	0.672891	0.567111	0.0721478	0.958494	1.38	0.84	0.87	0.85	1.54	1.69	1.94	0.78	0.58	0.97	0.87	0.99
mml-miR-654-3p	0.343055	7.8912	0.0803814	0.958494	238.76	186.62	198.53	149.31	310.7	327.12	208.14	134.74	131.39	256.19	255.48	155.32
mml-miR-365-3p	0.376213	3.56071	0.0840633	0.958494	11.88	8.88	10.24	7.48	21.61	11.26	8.79	6.5	7.43	12.24	12.75	5.49
mml-miR-494-3p	0.397818	5.45109	0.0849449	0.958494	44.08	33.85	39.01	29.75	46.29	68.31	37.03	34.86	27.73	33.28	55.46	17.91
mml-miR-23b-5p	-0.375707	3.04075	0.0850913	0.958494	6.14	7.78	7.3	7.77	5.2	6.19	4.23	7.85	7.68	7.62	9.26	6.48
mml-miR-1255a-5p	0.583533	0.787636	0.0935738	0.958494	1.58	1.06	0.76	2.18	2.48	1.31	1.18	0.22	1.59	1.61	0.87	0.99
mml-miR-877-3p	-0.344827	3.42349	0.0936915	0.958494	8.2	10.38	6.54	4.74	12.4	8.26	9.05	6.95	5.6	13.31	11.01	15.03
mml-miR-127-3p	-0.395605	2.64478	0.110567	0.958494	4.66	5.86	4.03	7.11	2.95	6.66	2.54	4.37	6.93	5.48	8.21	4.32
mml-miR-376a-3p	0.379483	4.36341	0.117957	0.958494	20.15	16.16	16.13	18.1	18.89	29.47	18.18	16.48	11.11	17.07	27.69	8.46
mml-miR-30c-2-3p	-0.448678	2.05108	0.120757	0.958494	2.98	3.87	0.54	3.79	1.06	5.54	3.97	1.46	3.68	2.04	7.95	4.23
mml-miR-16-2-3p	-0.470166	6.81962	0.129266	0.958494	81.13	125.22	66.9	29.28	139.59	96.65	73.21	132.61	43.02	114.03	286.31	50.13
mml-miR-155	0.282286	8.37538	0.135727	0.958494	314.49	257.33	298.34	367.13	217.29	393.46	296.23	275.19	324.83	156.76	255.65	274.2
mml-miR-15a-3p	-0.447294	1.95255	0.136333	0.958494	2.7	3.71	3.38	2.08	3.54	1.69	2.79	5.38	3.34	4.19	3.93	1.71
mml-miR-205	-0.503374	1.51642	0.144731	0.958494	1.81	2.83	0.98	1.52	1.89	2.63	2.03	0.67	1.17	3.01	4.45	4.86
mml-miR-550-5p	-0.581294	0.594455	0.156457	0.958494	0.91	1.33	0.87	1.52	0.83	0.56	0.76	1.01	1.17	1.18	1.83	1.44
mml-miR-1262-5p	0.431721	1.82208	0.157382	0.958494	3.3	2.48	2.72	0.85	2.01	4.22	6.68	3.25	0.25	1.61	2.62	4.68
mml-miR-16-1-3p	-0.423922	2.75971	0.158076	0.958494	4.63	6.73	4.14	5.02	4.84	4.32	4.82	9.42	9.02	6.76	6.46	1.98
mml-miR-376c-3p	0.29402	3.30981	0.16842	0.958494	9.76	7.67	7.52	6.06	8.86	19.24	7.1	7.4	7.1	6.44	13.1	4.32
mml-miR-340-5p	-0.375081	7.64858	0.170939	0.958494	145.41	213.35	113.65	174.71	120.34	224.93	93.42	258.04	131.8	147.63	453.05	76.22
mml-miR-374a-3p	-0.596265	0.918483	0.172989	0.958494	1.08	1.85	0.98	0.95	1.18	0.94	1.35	3.47	1.42	0.64	2.79	0.9
mml-miR-874-3p	-0.463939	0.870741	0.175252	0.958494	1.16	1.62	0.87	1.33	0.71	1.78	1.1	0.67	2.17	1.4	2.62	1.26
mml-miR-493-5p	0.423963	3.2713	0.184055	0.958494	9.58	6.34	8.83	20.75	3.9	11.45	2.96	5.49	11.94	3.22	4.19	6.84
mml-miR-1240	-0.264605	3.77772	0.199703	0.958494	10.91	12.82	8.17	6.82	12.87	9.1	17.58	8.97	7.6	15.78	15.55	16.2
mml-miR-499-5p	-0.363355	1.72754	0.211772	0.958494	2.33	2.99	2.4	2.65	1.18	3.28	2.11	4.04	4.09	1.61	2.71	2.52
mml-miR-335-5p	0.366365	4.2033	0.212845	0.958494	18.01	14.94	10.35	10.9	17.95	26.65	24.18	11.21	8.77	14.6	33.37	6.75
mml-miR-23a-3p	0.214813	11.1283	0.214297	0.958494	2147.73	1828.28	1606.44	1441.04	2761.86	2724.86	2204.48	1214.86	1403.82	1839.47	2341.76	2341.48
mml-miR-576-5p	0.295606	5.70258	0.217419	0.958494	53.16	39	40.21	14.31	66.25	50.67	94.35	31.95	17.29	43.91	51.53	50.31
mml-miR-376b-5p	0.423213	1.20777	0.218988	0.958494	2.2	1.57	2.07	0.66	2.72	3.75	1.78	1.35	1.09	2.79	1.75	0.9
mml-miR-423-5p	-0.237687	11.9543	0.219104	0.958494	3148.89	3754.1	3295.36	3377.2	2925.89	3262.74	2883.25	3329.71	3185.34	2766.61	4930.71	4558.14
mml-miR-148a-5p	0.325767	3.05311	0.221192	0.958494	7.7	6.53	6.54	4.74	7.2	12.01	8.03	3.03	4.51	3.97	8.56	12.6
mml-miR-92b-5p	-0.411791	1.43188	0.225136	0.958494	1.81	2.5	0.87	1.71	1.65	1.88	2.96	1.35	1	3.22	2.71	4.23
mml-miR-154-5p	0.280893	5.459	0.225944	0.958494	42.63	35.38	35.63	28.8	50.19	58.55	39.99	22.64	25.22	55.4	38.61	35.01
mml-miR-141-3p	-0.497427	0.384822	0.226581	0.958494	0.77	1.09	0.33	0.85	0.35	1.41	0.93	0.45	1.25	0.75	2.01	0.99
mml-miR-181a-5p	-0.339833	7.25682	0.230597	0.958494	116.47	149.04	113.54	178.68	81.48	151.17	57.49	109.07	173.15	61.95	237.22	163.78
mml-miR-4446-3p	-0.36504	1.71865	0.241162	0.958494	2.42	2.99	0.87	2.56	1.54	4.5	2.62	2.13	2.51	3.11	5.07	2.16
mml-miR-1226	-0.232434	7.84582	0.243079	0.958494	189.01	218.84	122.26	112.18	250.48	198.47	261.65	146.39	131.05	325.33	238.45	252.96
mml-miR-433-3p	0.4781	0.773934	0.245005	0.958494	1.59	1.06	2.07	0.47	1.77	2.44	1.18	0.56	0.75	0.97	1.31	1.71
mml-miR-299-5p	0.262209	6.51729	0.247769	0.958494	90.21	73.54	83.03	56.28	96.95	142.07	72.7	57.17	50.45	78.06	110.66	71.36
mml-miR-192-5p	0.233608	8.9932	0.252024	0.958494	504.75	406.53	311.96	180.96	753.44	435.22	842.19	322.15	152.94	648.62	515.68	393.26
mml-miR-186-5p	0.19087	11.3839	0.252338	0.958494	2589.28	2150.73	2158	1207.12	3867.8	2411.82	3301.65	1813.66	1352.03	2895.88	2415.22	2276.86
mml-miR-26a-2-3p	0.23952	3.5789	0.253933	0.958494	11.23	9.29	12.97	4.74	12.28	9.57	16.57	13.9	4.34	10.09	8.73	9.36
mml-miR-598-3p	-0.341605	1.67637	0.256239	0.958494	2.34	2.97	1.74	2.56	3.78	2.16	1.44	2.69	1.92	4.62	3.93	1.71
mml-miR-323a-3p	0.270017	5.25	0.257332	0.958494	36.89	30.31	27.35	35.53	35.43	56.49	29.67	27.8	19.38	28.45	45.42	30.51
mml-miR-133c-3p	-0.660702	3.1979	0.264047	0.958494	7.25	8.21	6.1	0.76	1.89	12.11	15.39	6.61	11.69	8.91	3.49	10.35
mml-miR-1306-5p	-0.244587	7.66636	0.26513	0.958494	162.21	190.81	138.71	137.85	196.04	119.83	218.62	175.76	116.6	214.53	192.68	254.49
mml-miR-9-5p	0.259997	2.59784	0.267599	0.958494	5.53	4.72	4.14	5.78	4.02	7.88	5.83	3.03	4.68	3.11	8.56	4.23
mml-miR-337-5p	-0.32011	2.74769	0.270369	0.958494	5.16	6.1	3.81	7.77	2.24	9.1	2.87	5.6	9.77	6.66	5.68	2.79
mml-miR-148b-5p	0.236251	4.04841	0.272083	0.958494	15.27	12.92	13.08	16.3	15.23	15.11	16.65	14.35	15.7	12.45	10.22	11.88
mml-miR-194-3p	-0.357971	1.14374	0.274038	0.958494	1.51	1.97	1.31	1.99	1.42	1.5	1.35	1.46	1.75	3.01	2.01	1.62
mml-let-7i-3p	-0.243802	4.57559	0.274761	0.958494	18.76	22.21	21.36	17.05	23.62	16.05	15.72	31.83	16.54	23.51	19.83	19.35
mml-miR-496	0.422277	0.486641	0.277717	0.958494	1.19	0.87	0.54	1.23	1.42	1.31	1.44	0.56	1	0.86	1.22	0.72
mml-miR-331-5p	-0.254518	5.53891	0.280917	0.958494	36.59	42.46	40.86	50.02	36.49	30.31	25.28	51	46.94	37.47	34.06	42.84
mml-miR-374a-5p	0.253817	6.69052	0.28102	0.958494	96.36	79.06	114.08	135.96	59.52	105.29	66.96	106.38	104.66	53.69	64.98	65.6
mml-miR-7	0.263763	11.3313	0.281679	0.958494	2456.88	2032.67	1589	2852.89	1459.76	3845	2537.74	2588.66	2758.02	1470.01	2369.54	977.12
mml-miR-98	0.277172	6.67166	0.282617	0.958494	95.99	78.02	87.39	138.99	59.16	125.09	69.32	82.28	129.8	64.42	55.29	58.31
mml-miR-33a	-0.5717	0.776693	0.28322	0.958494	0.95	1.68	0.65	1.33	0.47	1.13	1.18	3.03	0.42	1.29	3.06	0.63
mml-miR-190b	0.298886	5.18393	0.285338	0.958494	32.4	29.61	46.42	24.35	26.69	36.32	28.24	65.8	23.8	27.49	17.38	13.59
mml-miR-148a-3p	-0.250331	9.71353	0.285523	0.958494	678.37	807.4	376.25	725.16	460.57	944.38	885.48	831.17	672.38	557.68	1456.89	518.89
mml-miR-409-5p	0.207575	3.73349	0.290716	0.958494	12.81	10.73	8.83	10.23	13.46	23.74	7.78	9.19	8.69	9.99	18.69	7.11
mml-miR-370-3p	-0.2898	5.25793	0.290989	0.958494	31.89	32.91	28.98	68.88	12.4	35.75	13.44	38.9	41.76	23.62	39.92	20.34
mml-miR-454-3p	0.236997	9.12114	0.292145	0.958494	501.03	451.9	512.89	550.93	375.3	603	463.03	571.56	764.43	377.62	300.29	245.59
mml-miR-30b-5p	0.213921	10.3622	0.294478	0.958494	1286.03	1042.54	957.56	598.68	1618.83	1211.73	2043.34	993.92	689.76	1592.3	1082.36	854.38
mml-miR-584-5p	-0.174579	9.36655	0.294853	0.958494	544.91	595.65	365.24	929.24	460.21	695.53	274.33	392.88	1033.3	470.71	690.36	391.01
mml-miR-197-3p	-0.200551	11.5548	0.296042	0.958494	2425.91	2851.15	2292.25	1587.7	3119.92	2583.07	2546.61	1828.79	1964.27	3064.67	2813.16	4584.86
mml-miR-424-3p	-0.269982	5.10992	0.301396	0.958494	28.75	30.8	29.53	45.76	30.94	31.25	6.26	31.61	39.84	29.53	38.08	14.94
mml-miR-152-3p	0.226106	3.30468	0.304023	0.958494	8.87	7.85	11.55	9.38	3.42	11.35	8.62	13.23	5.93	2.79	11.09	6.21
mml-miR-133d-3p	-0.642184	4.23457	0.310126	0.958494	15.64	16.46	10.79	1.8	3.66	24.4	37.54	14.35	25.81	16.96	6.64	18.54
mml-miR-542-5p	-0.292148	2.08513	0.310561	0.958494	3.21	3.82	1.85	5.02	4.49	3.1	1.61	4.15	4.84	4.4	4.11	1.62
mml-miR-206	-0.34965	1.64589	0.311211	0.958494	2.26	2.72	2.62	1.71	0.59	3.19	3.21	2.24	3.42	2.04	2.01	3.87
mml-miR-933	0.351522	1.01235	0.312486	0.958494	1.77	1.35	0.33	1.52	3.31	0.66	3.04	0.34	1.25	2.04	0.44	2.7
mml-miR-149-5p	-0.359809	2.43246	0.31251	0.958494	2.99	5.65	3.49	1.23	1.42	1.13	7.69	3.36	0.5	1.5	1.75	21.15
mml-miR-337-3p	0.233445	3.02681	0.315382	0.958494	7.87	6.34	5.34	3.69	9.33	12.76	8.2	5.49	4.59	9.13	7.16	5.31
mml-miR-323b-3p	0.229237	6.33238	0.318182	0.958494	76.79	66.28	66.69	52.2	73.45	110.26	81.33	72.3	38.34	61.42	104.55	54.8
mml-miR-192-3p	0.305084	1.66779	0.318917	0.958494	2.93	2.33	1.53	1.71	4.96	2.25	4.23	1.91	0.84	3.87	2.53	2.52
mml-miR-196a-5p	0.222103	7.8048	0.319827	0.958494	211.42	173.73	157.45	320.42	106.05	333.5	139.66	157.94	313.22	113.28	171.72	112.49
mml-miR-29c-5p	0.229769	5.8967	0.329006	0.958494	57.8	47.99	47.4	25.86	89.04	56.77	69.92	26.9	32.66	74.09	52.23	54.08
mml-miR-409-3p	0.181106	9.79873	0.330719	0.958494	832.77	740.56	631.11	850.22	793.83	1108.79	779.89	784.54	567.47	792.39	1064.98	493.42
mml-miR-96	-0.360846	1.0269	0.33081	0.958494	1.37	1.77	0.98	1.71	1.42	2.06	0.68	0.67	2.92	1.07	2.18	1.98
mml-miR-450a-1-3p	-0.266843	2.20578	0.332999	0.958494	3.49	4.2	3.27	4.26	4.49	4.22	1.18	4.71	6.35	3.11	5.42	1.44
mml-miR-135a-5p	0.321808	1.34293	0.333771	0.958494	2.31	1.75	5.01	1.04	2.24	1.5	1.78	3.25	1.5	1.61	0.7	1.71
mml-miR-200a-3p	-0.401829	0.463441	0.334854	0.958494	0.84	1.12	0.76	1.61	0.59	0.56	0.68	0.34	2.17	0.97	0.96	1.17
mml-miR-374b-5p	0.242025	6.95878	0.335198	0.958494	113.78	99.14	145.68	104.88	101.8	129.97	86.57	112.88	163.29	69.25	68.39	81.89
mml-miR-628-3p	0.18745	3.47062	0.336444	0.958494	10.02	8.79	7.3	13.07	6.85	13.14	9.72	6.84	12.53	5.05	11.18	8.37
mml-miR-199a	0.234314	3.98401	0.338277	0.958494	15.7	11.91	7.85	3.69	12.52	17.17	37.28	5.83	4.01	17.82	13.36	18.54
mml-miR-101-1-5p	-0.327021	1.32109	0.339611	0.958494	1.71	2.26	2.29	1.61	1.3	2.16	1.18	3.47	3.26	1.93	1.92	0.72
mml-miR-937	-0.406677	0.807088	0.347059	0.958494	1.1	1.58	0.98	0.95	1.77	0.94	0.85	0.22	1.09	2.15	1.48	2.97
mml-let-7f-5p	0.235094	13.2675	0.347396	0.958494	8950.2	7682.92	7712.92	15236.8	4893.8	9301.48	7606.03	9660.92	13379.4	6121.82	4547.45	4705
mml-miR-1249	-0.257643	6.50371	0.349147	0.958494	76.59	90.6	56.22	20.65	194.97	82.01	29.08	32.62	26.31	229.02	106.56	58.49
mml-miR-7180-3p	-0.210001	4.42509	0.351589	0.958494	17.53	20.03	10.68	18.47	22.67	21.77	14.03	11.21	18.04	23.08	25.07	22.77
mml-miR-431	0.227832	4.7868	0.351959	0.958494	27.07	21.45	21.9	30.98	25.86	45.7	10.91	16.48	24.89	18.68	30.74	16.47
mml-miR-942-3p	0.236831	2.73775	0.352057	0.958494	6.22	5.04	5.12	7.01	9.8	2.91	6.26	5.6	4.26	7.09	4.19	4.05
mml-miR-138-3p	-0.204704	3.11644	0.354108	0.958494	6.93	8.06	5.12	6.16	6.97	10.04	6.34	8.74	5.6	6.98	12.84	6.12
mml-miR-143-3p	-0.40289	2.45129	0.356131	0.958494	3.92	5.36	6.21	4.26	3.78	3.57	1.78	1.12	4.59	7.52	9	4.59
mml-let-7a-3p	0.263171	6.52616	0.356921	0.958494	93.98	71.46	57.1	23.31	138.17	85.86	165.45	60.19	24.31	115.53	102.02	55.25
mml-miR-329-3p	0.200966	2.96054	0.357958	0.958494	7.57	6.19	7.08	2.37	10.39	13.61	4.4	6.73	2.26	7.84	9.43	4.68
mml-miR-375	-0.42215	1.38163	0.366972	0.958494	1.77	2.33	3.38	1.42	0.94	2.53	0.59	0.9	4.76	0.97	3.23	1.8
mml-miR-362-5p	-0.198297	4.54041	0.367114	0.958494	19.39	21.83	14.71	14.59	25.74	28.06	13.86	13.45	18.96	25.23	32.06	19.44
mml-miR-532-3p	-0.145622	9.46195	0.369554	0.958494	586.92	648.89	585.13	433.16	716.83	530.18	669.31	600.59	429.74	890.31	658.57	665.21
mml-miR-30c-5p	0.200282	13.3079	0.371212	0.958494	9823.1	8094.81	7687.42	4919.89	12065.4	9421.12	15021.7	7679.01	5319.5	11161.8	8886.23	7427.5
mml-miR-7186-3p	0.239833	6.01157	0.37208	0.958494	61.76	53.33	56.01	30.79	104.28	60.43	57.32	56.72	34.33	85.9	68.04	21.69
mml-miR-29c-3p	-0.191022	9.48408	0.372165	0.958494	560.63	652.92	499.16	923.08	379.08	519.77	482.05	850.89	986.69	645.94	459.16	321.9
mml-miR-26b-5p	0.187383	11.2844	0.372914	0.958494	2254.26	1959.57	1682.6	4255.08	1368.47	2403.28	1561.89	2173.59	3615.91	1616.46	1278.36	1113.55
mml-miR-543-3p	0.231889	3.17981	0.372936	0.958494	8.86	7.02	7.08	7.77	8.27	17.74	3.47	4.71	5.18	6.33	12.05	6.84
mml-miR-1185-3p	0.309929	1.00327	0.373216	0.958494	1.69	1.4	1.42	2.65	1.77	1.69	0.93	1.91	2.42	1.18	0.79	0.72
mml-miR-656-3p	0.386789	0.264821	0.373373	0.958494	1.02	0.72	0.87	0.28	1.06	1.97	0.93	0.78	0.42	0.64	0.96	0.81
mml-miR-3146	0.31965	1.42992	0.377374	0.958494	2.47	2	1.09	1.61	4.13	3.85	1.69	2.02	0.84	1.72	4.28	1.17
mml-miR-485-5p	0.282846	1.82898	0.378225	0.958494	3.2	2.7	2.29	3.88	2.72	5.07	2.03	2.35	1.5	1.61	5.42	2.61
mml-miR-190a-5p	0.244463	6.58323	0.37988	0.958494	104.2	76.36	77.25	13.36	7.44	360.99	61.97	114.89	11.61	7.95	215.74	31.59
mml-let-7g-5p	0.20629	12.6681	0.3801	0.958494	5783.06	5191.21	6371.59	8974.21	3433.81	5984.22	4151.45	7330.52	8598.56	4289.44	2766.95	2970.61
mml-miR-99a-5p	0.223483	4.82777	0.382635	0.958494	27.05	24.39	26.04	11.65	19.96	57.8	19.78	18.61	14.45	8.7	59.57	20.61
mml-miR-26a-5p	0.169519	12.0456	0.384102	0.958494	3820.49	3396.29	4813.53	4712.69	2972.18	4031.08	2572.99	3774.16	4850.84	1991.5	2998.94	3366.03
mml-miR-1180-3p	-0.228908	8.79863	0.391837	0.958494	356.62	421.35	382.89	354.91	389.24	461.12	194.95	263.87	415.29	319.53	493.05	615
mml-miR-3200-3p	-0.187196	7.45365	0.391989	0.958494	143.98	163.78	82.92	146.28	197.81	127.53	165.36	95.95	120.61	236.21	167.18	198.97
mml-miR-139-5p	0.339211	0.820491	0.392998	0.958494	1.5	1.19	0.98	1.61	0.47	2.91	1.52	0.34	0.67	1.07	2.27	1.62
mml-miR-377-3p	0.257209	1.85894	0.39708	0.958494	3.5	2.62	2.94	2.08	2.72	8.07	1.69	2.58	1.67	2.47	3.93	2.43
mml-miR-378a	-0.187961	7.17557	0.399285	0.958494	114.6	133.53	103.19	166.94	90.46	127.43	84.96	107.16	211.99	70.54	158.62	119.33
mml-miR-18a-5p	-0.172478	3.84085	0.399788	0.958494	11.53	13.08	13.4	9.28	13.46	11.35	10.14	16.93	13.61	13.96	13.36	7.56
mml-miR-17-3p	-0.203132	2.70617	0.406798	0.958494	5.27	5.81	6.76	4.26	5.31	7.23	2.79	6.17	5.93	4.29	7.51	5.13
mml-miR-335-3p	0.204413	4.13964	0.407435	0.958494	17.42	13.66	18.52	4.26	24.09	21.02	19.19	11.88	7.77	14.71	17.73	16.2
mml-miR-4677-5p	0.349746	0.402956	0.407861	0.958494	1.11	0.85	1.09	0.47	1.42	1.13	1.44	0.9	0.75	1.18	0.96	0.45
mml-miR-378d	-0.200764	4.49005	0.410691	0.958494	17.69	20.53	17.54	25.86	15.35	18.96	10.74	23.32	28.9	9.66	24.37	16.38
mml-miR-1235	-0.244935	2.2911	0.413603	0.958494	3.95	4.6	2.4	0.66	6.73	7.32	2.62	1.79	0.67	7.62	6.99	5.94
mml-miR-100-5p	0.429095	0.702196	0.414115	0.958494	1.4	1.07	1.53	1.71	2.13	1.13	0.51	0.11	1.42	0.64	1.92	1.26
mml-miR-30c-1-3p	-0.176956	5.05424	0.414629	0.958494	27.19	30.58	23.75	27.95	28.34	30.12	25.78	27.13	29.74	36.08	34.76	25.2
mml-miR-1304	0.188763	5.64543	0.415843	0.958494	44.22	39.76	42.28	64.99	24.92	38.85	50.05	52.24	63.48	19.97	28.04	35.1
mml-miR-1271-5p	0.196426	6.94904	0.418132	0.958494	120.8	95.76	102.42	117.01	265.12	68.13	51.32	65.46	131.14	155.04	71.27	55.88
mml-miR-6505-3p	0.250262	1.76004	0.421396	0.958494	3.19	2.4	2.4	0.85	4.49	2.72	5.5	2.13	1.59	2.79	2.79	2.7
mml-miR-107-3p	-0.148681	8.28056	0.425259	0.958494	253.97	281.94	267.18	362.3	195.56	295.03	149.81	252.32	440.18	190.37	346.84	179.98
mml-miR-942-5p	0.143962	10.9847	0.42668	0.958494	1884.48	1662.69	1984.97	1190.16	2878.77	1615.04	1753.46	1432.32	1211.87	2026.83	1405.09	2237.36
mml-miR-150-5p	-0.182874	14.36	0.426852	0.958494	17297.8	19536.5	15407.6	17629.9	17567	20220.8	15663.4	14887.9	18889.2	19491.1	23956.9	20457.6
mml-miR-222-3p	-0.175397	7.93319	0.429382	0.958494	198.99	219.11	300.52	186.07	189.66	189.83	128.84	249.85	294.18	162.99	183.07	205.45
mml-miR-320a	-0.166109	11.5073	0.437296	0.958494	2379.37	2685.87	2941.34	2396.33	2245.91	2669.31	1643.98	2213.49	2713.58	1694.19	3581.43	3226.63
mml-miR-31-5p	0.272763	1.07481	0.437467	0.958494	1.86	1.47	1.31	1.71	1.3	4.5	0.51	0.9	2.34	0.86	2.71	0.54
mml-miR-182	0.181763	5.11569	0.437626	0.958494	31.6	27.83	19.29	48.79	24.45	27.96	37.54	14.46	39.17	21.69	37.56	26.28
mml-miR-142-5p	-0.186766	12.7859	0.442005	0.958494	5724.55	6798.59	5237.18	3331.25	5618.54	6693.07	7742.73	8914.05	3338.19	5991.04	11207.2	4542.48
mml-let-7g-3p	-0.222307	1.73533	0.443703	0.958494	2.53	2.94	2.72	2.08	3.42	1.78	2.62	3.7	2.67	3.65	2.97	1.71
mml-miR-93-3p	0.180353	10.5379	0.445695	0.958494	1497.92	1158.53	1526.78	415.26	2714.38	1353.23	1479.97	814.69	836.51	1482.03	1415.4	1244.04
mml-miR-221-3p	-0.150889	11.9107	0.447646	0.958494	3167.09	3473.09	3670.4	3925.19	2659.94	4059.98	1519.95	3248.89	5663.96	2175.32	3778.56	2498.69
mml-miR-10a-5p	0.163263	5.73104	0.449485	0.958494	49.87	44.14	39.66	31.36	61.76	58.65	57.91	31.61	29.9	49.71	60.35	49.14
mml-miR-30e-5p	-0.137744	10.3689	0.450538	0.958494	1099.21	1205.28	1106.19	875.71	1323.48	953.02	1237.67	1522.89	1009.41	1283.4	1351.81	858.87
mml-miR-24-3p	0.120003	9.7512	0.450646	0.958494	786.12	719.38	602.89	853.06	908.85	919.33	646.48	505.31	954.28	765.44	734.56	637.32
mml-miR-4766-5p	0.197231	2.36398	0.452936	0.958494	4.61	4.05	3.49	4.45	5.31	6.01	3.8	4.82	4.76	4.08	4.54	2.07
mml-miR-361-5p	0.134704	11.3283	0.453704	0.958494	2405.13	2157.39	1846.37	1834.6	3327.17	2853.42	2164.07	1397.68	2072.52	2206.78	2874.21	2235.74
mml-miR-582-3p	0.217315	2.2696	0.461042	0.958494	4.49	3.4	0.98	1.04	5.31	1.31	13.78	1.57	0.84	4.19	1.14	9.27
mml-miR-28-5p	0.245532	1.47667	0.46151	0.958494	2.49	2.05	2.29	2.37	2.6	3.94	1.27	1.23	1.5	2.04	3.14	2.34
mml-miR-196b-5p	0.182593	4.24778	0.467936	0.958494	16.81	14.92	15.15	29.65	8.27	19.99	10.99	14.24	31.07	9.66	8.91	10.71
mml-miR-296-5p	-0.116752	10.0222	0.469051	0.958494	882.62	939.98	957.02	679.87	1040.52	939.13	796.54	846.63	915.36	950.44	1120.97	866.52
mml-miR-187-5p	-0.169623	5.33912	0.469168	0.958494	33.36	39.8	33.34	10.61	50.43	50.77	21.64	50.33	8.77	52.29	66.82	20.79
mml-miR-15b-5p	-0.171748	13.6533	0.47494	0.958494	10842.2	10966.1	9738.53	21828.4	6334.54	10846.6	5463.09	12079.5	16040.3	8625.48	9791.37	8293.94
mml-miR-449a-5p	0.239252	1.63858	0.477005	0.958494	2.4	2.4	1.09	6.16	1.54	1.6	1.61	0.9	7.68	1.72	0.61	1.08
mml-miR-194-5p	0.133711	8.31794	0.478953	0.958494	296.08	261.63	213.35	229.66	358.53	281.61	397.26	221.49	243.81	327.16	236.35	279.33
mml-miR-151-3p	0.116672	10.0308	0.480101	0.958494	977.12	867.74	595.81	683.47	1380.28	806.16	1419.86	602.27	612.16	1244.96	907.32	971.99
mml-miR-142-3p	0.146394	13.4571	0.483052	0.958494	10643.1	9272.48	10101.9	5651.3	15268.6	10404.1	11789.8	8118.19	6378.69	12118.5	10727.7	9019.26
mml-miR-181a-3p	0.143772	3.92411	0.484797	0.958494	14.32	12.68	9.15	7.96	18.54	23.18	12.77	8.41	9.02	11.06	23.15	11.79
mml-miR-652	-0.171908	8.12803	0.486297	0.958494	232.15	253.54	297.9	214.69	243.04	273.82	131.29	212.53	290	197.02	271.81	296.34
mml-miR-381-3p	0.154997	4.98983	0.488095	0.958494	29.41	26.45	28	25.3	30.94	39.04	23.76	18.94	25.56	34.57	33.02	20.16
mml-miR-29b-3p	0.156921	8.10075	0.489476	0.958494	248.9	221.88	221.74	256.66	226.15	202.88	337.06	310.61	227.36	217.21	183.86	170.35
mml-miR-296-3p	-0.148859	3.99666	0.49451	0.958494	13.14	14.73	6.21	13.45	16.77	15.48	13.78	6.17	11.69	17.18	20.26	18.36
mml-miR-503-3p	-0.148131	5.74256	0.498151	0.958494	44.87	48.01	41.95	59.88	55.39	50.67	16.49	50.44	63.23	54.76	50.75	20.88
mml-miR-130b-3p	0.156682	5.17291	0.500795	0.958494	31.33	29.47	34.87	43.2	25.86	26.27	26.46	43.27	44.77	22.23	20.18	16.92
mml-miR-210-3p	-0.125632	9.27845	0.502894	0.958494	503	563.1	462	735.77	431.63	534.59	351.01	630.97	820.14	628.97	477.33	258.09
mml-miR-101-3p	-0.146909	10.0019	0.505189	0.958494	807.84	918.82	722.2	1534.55	465.88	768.06	548.5	1343.32	1490.52	739.24	681.1	339.9
mml-miR-3140	0.180479	2.13882	0.505405	0.958494	4	3.39	2.51	2.84	4.96	5.91	3.8	2.58	3.76	3.54	3.93	3.15
mml-miR-185-3p	-0.180307	4.1979	0.510748	0.958494	14.23	16.92	12.97	18.85	15	12.39	11.92	9.19	18.46	12.35	15.63	28.98
mml-let-7d	0.123975	11.8481	0.512284	0.958494	3328.31	3000.48	3113.28	4455.37	2395.41	4036.43	2641.05	2662.42	4133.27	2319.84	2552.17	3334.71
mml-miR-200c-3p	-0.147335	3.65773	0.515512	0.958494	10	11	8.17	16.3	4.13	12.29	9.13	9.19	21.3	6.76	7.95	9.81
mml-miR-26b-3p	0.147326	5.81818	0.515585	0.958494	51.04	47.67	39.99	37.8	66.84	46.83	63.74	32.06	27.23	71.29	40.27	67.49
mml-miR-324-3p	-0.139397	7.36726	0.516118	0.958494	137.89	152.78	119.42	102.99	173.48	136.72	156.82	98.53	113.93	185.21	181.85	184.39
mml-miR-106b-3p	-0.145409	11.5035	0.51647	0.958494	2425.25	2621.21	2840.22	2476.95	2675.29	2736.78	1397.03	2040.42	2822.67	2247.69	2781.8	3213.49
mml-miR-195-5p	0.209939	1.10206	0.516595	0.958494	1.79	1.59	2.51	1.8	1.42	1.97	1.27	2.8	1.59	1.5	1.05	0.99
mml-miR-889-3p	0.209867	1.51185	0.516821	0.958494	2.46	2.15	2.4	3.22	2.24	3.1	1.35	3.7	1.84	1.61	2.27	1.35
mml-miR-183-5p	-0.147374	3.24288	0.517762	0.958494	7.42	8.21	4.69	16.58	4.02	6.76	5.07	3.03	17.12	4.51	9.08	7.29
mml-miR-627-5p	0.172686	6.37502	0.51913	0.958494	75.71	68.2	59.28	83.28	75.46	77.42	83.1	92.03	62.14	69.9	75.9	41.04
mml-miR-1306-3p	-0.245944	0.716309	0.520534	0.958494	1.13	1.35	0.98	1.23	1.3	1.31	0.85	1.12	0.92	1.07	1.48	2.16
mml-miR-451	0.168965	15.3666	0.523287	0.958494	39692.6	34543.4	48304.1	21606.9	44577.2	44292.3	39682.6	33808	23301.3	29121	42741.8	43745.3
mml-miR-363-3p	0.161386	4.79839	0.52928	0.958494	26.57	22.52	30.84	11.65	39.56	31.53	19.28	20.4	12.61	22.12	28.21	29.25
mml-miR-19a-3p	-0.17012	7.40295	0.532414	0.958494	135.45	159.7	118.77	126.01	119.39	163.93	149.13	221.38	161.87	139.9	205.78	69.56
mml-miR-30d-3p	0.132125	3.39829	0.533581	0.958494	9.31	8.59	8.39	10.42	9.33	10.79	7.61	10.76	11.36	7.73	7.51	5.58
mml-miR-491-3p	0.164949	3.62678	0.534772	0.958494	11.54	10.05	9.81	4.36	14.53	10.42	18.6	10.2	4.59	16.64	12.32	6.48
mml-miR-550-3p	0.164228	2.33733	0.538818	0.958494	4.52	4.05	4.47	3.41	5.9	5.16	3.64	3.59	2	4.29	5.33	5.04
mml-miR-184	-0.287338	0.750752	0.541792	0.958494	1.1	1.48	0.65	1.14	1.06	1.88	0.76	0.56	0.67	2.68	0.96	2.52
mml-miR-628-5p	0.169725	2.13991	0.543898	0.958494	3.9	3.35	2.29	4.74	2.36	6.38	3.72	2.35	4.93	2.36	3.41	3.69
mml-miR-7204-3p	0.139465	5.9329	0.54679	0.958494	57.96	50.18	46.64	29.75	88.45	55.36	69.58	40.02	33.66	58.41	64.55	54.26
mml-miR-145-5p	0.188669	1.81358	0.547191	0.958494	3.09	2.76	2.4	2.08	4.96	2.53	3.47	2.24	3.01	4.83	2.53	1.17
mml-miR-382-5p	0.147506	6.25762	0.5495	0.958494	71.73	58.8	56.22	139.37	31.41	94.03	37.62	64.57	88.62	40.59	69.09	31.14
mml-miR-425	0.156817	14.1757	0.551757	0.958494	17734.4	14983.3	20653.4	7691.68	25797.1	18139.9	16390.1	12433.1	10736.4	13852.8	18555.7	19338.6
mml-miR-486-3p	-0.237407	1.28697	0.554994	0.958494	1.93	2.05	3.16	1.04	1.89	3.28	0.25	1.57	1.34	1.29	4.54	1.53
mml-miR-320b	-0.158382	5.44863	0.557338	0.958494	35.69	40.21	40.53	35.62	34.72	44.01	23.59	29.82	39.09	26.41	53.72	52.01
mml-miR-199a-5p	0.143239	3.85819	0.557868	0.958494	14.24	11.02	6.76	3.41	11.34	16.8	32.89	7.51	4.09	14.82	12.4	16.29
mml-miR-92a-3p	-0.1945	16.7235	0.559599	0.958494	87557.5	100123	117803	79155.4	91776.7	87314.2	61738.1	84759.9	79854.4	82015.3	108830	145157
mml-miR-503-5p	-0.129265	7.30158	0.561056	0.958494	130.46	138.28	107.55	257.51	135.22	119.83	32.21	151.55	233.45	164.6	107.69	34.11
mml-miR-187-3p	-0.106249	9.80467	0.565427	0.958494	765.64	817.89	672.95	716.54	680.57	1153.74	604.38	837.22	529.14	988.99	1072.23	661.88
mml-miR-421	0.139615	6.42843	0.566954	0.958494	79.32	71.15	58.62	72.86	82.67	89.05	93.42	76.78	70.25	66.68	88.13	53.9
mml-miR-99b-5p	0.130156	5.90564	0.56892	0.958494	55.44	51.29	44.46	41.12	35.78	92.62	63.24	46.97	30.32	35.11	96.34	47.7
mml-miR-299-3p	0.174	2.24363	0.571996	0.958494	4.14	3.59	2.72	8.53	2.6	4.5	2.37	4.26	5.68	3.97	2.71	1.35
mml-miR-500b-5p	0.137077	3.34534	0.57566	0.958494	9.43	8.28	10.68	5.78	13.11	11.73	5.83	5.6	8.52	7.62	12.93	6.75
mml-miR-30a-5p	-0.128446	6.76772	0.580316	0.958494	93.3	96.9	35.3	82.24	51.13	105.57	192.25	42.6	81.52	55.4	142.63	162.34
mml-miR-27a-5p	-0.219352	0.769636	0.580505	0.958494	1.25	1.33	0.54	2.27	1.42	1.69	0.34	1.12	2	1.4	1.05	1.08
mml-miR-29a-3p	-0.120622	7.77299	0.582507	0.958494	186.69	189.3	143.5	330.37	139.82	200.53	119.2	159.84	240.22	183.39	209.97	153.07
mml-miR-19b	0.132858	12.1734	0.582601	0.958494	4323.92	3865.98	3353.98	2439.81	5155.5	4754.1	5916.23	4467.22	2859.84	4346.99	5371.53	2284.33
mml-miR-338-3p	0.151436	4.61375	0.58711	0.958494	22.53	18.9	11.33	40.93	16.06	24.4	19.95	14.46	22.3	18.36	13.28	26.1
mml-miR-369-3p	0.225533	1.17884	0.588247	0.958494	2.04	1.45	0.98	5.59	0.59	2.44	0.59	1.91	2.26	1.07	1.57	0.45
mml-miR-330-3p	0.164418	1.58271	0.5909	0.958494	2.56	2.32	2.18	2.18	3.07	2.25	3.13	1.57	1.25	2.58	3.32	2.88
mml-miR-660-3p	0.153068	1.84652	0.591192	0.958494	3.24	2.77	2.83	1.33	5.55	2.53	3.97	1.68	1.92	4.29	3.06	2.88
mml-miR-30e-3p	0.109286	8.20977	0.5917	0.958494	271.61	248.58	228.17	193.84	347.43	278.6	310.01	269.47	207.14	330.38	252.51	183.4
mml-miR-424-5p	-0.135141	6.35331	0.593803	0.958494	64.66	75.21	63.74	106.02	67.31	67.38	18.85	117.36	98.89	78.49	67.17	14.13
mml-miR-23b-3p	0.0887193	9.65256	0.593819	0.958494	743.55	690.97	666.96	457.13	962.82	950.86	679.96	601.26	459.64	653.03	1043.75	697.16
mml-miR-486-5p	-0.163848	17.0776	0.594069	0.958494	115199	127363	138996	61118	143827	104476	127581	101695	75838.7	162096	126357	170829
mml-miR-500b-3p	0.237691	0.620509	0.595424	0.958494	1.29	1.07	1.09	1.14	2.13	1.69	0.42	0.9	0.84	1.93	0.44	1.26
mml-miR-103-3p	-0.102009	12.9413	0.596624	0.958494	6517.96	6962.76	6092.97	10130	4532.32	7401.08	4433.47	5957.49	11653.3	4841	7418.95	4943.03
mml-miR-4677-3p	0.170055	1.74059	0.59718	0.958494	2.96	2.54	2.18	1.33	2.6	3.38	5.33	2.35	1.25	3.97	2.88	2.25
mml-miR-191-3p	-0.117803	6.3611	0.600851	0.958494	69.48	76.12	43.26	65.75	85.38	83.52	69.49	42.48	64.4	103.4	99.31	71
mml-miR-199a-3p	-0.163596	5.38087	0.608089	0.958494	33.44	38.82	42.39	53.25	14.41	32.56	24.6	19.84	39.84	19.43	80.36	34.65
mml-miR-128b-3p	0.0891196	11.5985	0.608977	0.958494	2881.41	2616.91	2087.61	1598.97	4494.88	2529.49	3696.11	2340.83	1496.78	3929.86	2794.99	2522.09
mml-miR-128a-3p	0.0915307	11.8119	0.612814	0.958494	3338.1	3043.36	2322.97	1988.65	5068.46	3089.04	4221.36	2665.78	1801.4	4483.24	3425.52	2840.84
mml-miR-148b-3p	0.100046	9.48983	0.615157	0.958494	664.49	602.21	340.4	855.05	669.95	786.92	670.15	461.82	499.57	634.45	892.82	522.4
mml-miR-32-5p	-0.111812	4.06929	0.621134	0.958494	13.27	15.06	21.68	13.45	10.98	10.6	9.64	29.93	13.45	8.27	14.76	8.91
mml-miR-940	-0.226116	0.501879	0.624934	0.958494	1.04	1.1	0.65	0.66	2.13	1.41	0.34	0.56	0.75	1.18	1.4	1.62
mml-miR-636	-0.116337	4.13884	0.627699	0.958494	14.96	15.64	14.82	7.86	23.15	12.29	16.65	10.87	11.19	16.43	17.03	22.68
mml-miR-340-3p	0.118345	6.61976	0.628531	0.958494	91	82.78	83.03	44.34	108.17	98.72	120.72	94.83	43.02	113.81	96.08	66.14
mml-miR-6505-5p	0.201294	0.443698	0.630415	0.958494	1.09	0.95	0.44	0.85	1.54	1.6	1.01	1.01	0.58	1.5	1.22	0.45
mml-let-7a-5p	0.127558	15.2052	0.632322	0.958494	33727.3	30545.4	32412.2	51201.2	22103.8	37168.4	25751	33958.4	47993	26381.2	21462.4	22932.1
mml-miR-493-3p	0.116546	2.54887	0.634012	0.958494	5.16	4.52	4.03	9.76	2.72	6.66	2.62	3.47	7.43	3.22	5.59	2.88
mml-miR-7172-5p	-0.130197	1.90832	0.63665	0.958494	3	3.23	2.51	1.14	3.66	3.19	4.48	1.57	1.84	4.19	3.49	5.04
mml-miR-134-5p	0.11051	5.2536	0.636854	0.958494	34.88	30.76	27.89	52.2	24.21	47.11	23	33.07	38.76	27.27	33.28	21.42
mml-miR-411-5p	0.167281	1.39053	0.637912	0.958494	2.27	1.86	2.18	4.74	0.94	2.82	0.68	2.58	2.84	1.5	1.57	0.81
mml-miR-7205-3p	-0.111141	5.70234	0.639528	0.958494	42.85	47.71	34.65	19.9	59.05	35.47	65.18	27.69	24.72	47.89	40.35	97.91
mml-miR-432-5p	-0.134027	5.60494	0.639645	0.958494	42.38	41.26	26.59	80.44	20.78	56.87	27.22	46.07	44.85	35.43	53.19	26.73
mml-miR-126	0.0950686	10.3306	0.643305	0.958494	1135.53	1032.66	1400.93	1948.38	373.06	1273.1	682.16	1605.28	1648.46	600.41	870.55	438.62
mml-miR-505-3p	-0.111326	5.99754	0.649978	0.958494	53.98	59.37	33.56	47.56	66.01	74.98	47.77	33.96	35.16	80.1	72.15	75.5
mml-miR-27a-3p	-0.105444	6.23714	0.650588	0.958494	64.11	67.92	42.17	68.59	66.84	70.94	72.03	57.28	58.89	82.57	81.67	59.21
mml-miR-21-5p	0.0727478	9.34093	0.651048	0.958494	576.56	546.01	629.59	714.17	478.04	710.07	350.93	636.46	698.02	383.42	666.69	345.48
mml-miR-342-5p	-0.127915	2.46548	0.653517	0.958494	4.47	4.79	2.18	7.96	2.95	5.54	3.72	2.35	4.43	4.19	8.73	4.23
mml-let-7i-5p	0.10752	13.6549	0.653577	0.958494	11309.8	10632.1	11340.3	15560.5	8042.65	12094.4	9510.98	13112.9	15865.2	9640.99	6587.88	7953.59
mml-miR-324-5p	-0.0959166	7.4922	0.656291	0.958494	154.55	160.73	138.82	104.41	191.67	129.4	208.48	151.55	113.85	199.82	176.17	162.25
mml-miR-21-3p	-0.150235	1.00769	0.657328	0.958494	1.48	1.68	1.09	1.89	1.54	1.69	1.18	1.46	1.42	2.25	2.36	0.9
mml-miR-301a-5p	-0.16578	0.521153	0.665034	0.965883	1.01	1.14	0.54	0.85	1.42	1.22	1.01	0.67	0.58	1.72	1.48	1.26
mml-miR-542-3p	0.136351	1.69086	0.670632	0.967109	2.72	2.55	2.18	4.17	3.19	2.72	1.35	3.81	2.76	2.25	3.23	0.72
mml-miR-487b-5p	0.117703	1.92627	0.671163	0.967109	3.29	3.04	2.83	2.94	3.66	4.32	2.71	2.47	1.75	3.44	3.84	3.69
mml-miR-491-5p	-0.105665	7.36854	0.67824	0.972159	143.48	150.63	148.73	91.62	210.32	170.88	95.87	95.17	126.63	147.1	225.35	158.92
mml-miR-372-3p	0.136593	1.7645	0.67998	0.972159	3.1	2.6	7.52	0.76	0.71	5.82	0.68	6.61	0.42	1.29	3.76	0.9
mml-miR-487b-3p	0.082633	3.68988	0.685118	0.975136	11.6	10.93	9.59	11.56	11.57	18.02	7.27	11.88	8.77	9.45	17.73	6.84
mml-miR-500a-3p	-0.0860675	4.74922	0.689044	0.975136	22.97	23.97	17.33	25.68	23.38	30.97	17.5	18.38	25.89	26.09	30.4	19.08
mml-miR-361-3p	-0.0787688	11.6451	0.691502	0.975136	2746.69	2927.39	2217.06	1904.04	3565.84	2700.56	3345.95	2832.13	1914.33	4301.89	3604.75	1983.85
mml-miR-146a-5p	-0.0748991	8.09226	0.696884	0.975136	230.1	238.63	205.18	375.84	180.8	235.91	152.76	224.97	350.56	193.7	280.55	143.36
mml-miR-7186-5p	-0.098873	5.7883	0.698167	0.975136	47.6	47.26	57.75	68.5	43.81	49.92	18.01	48.31	60.39	37.36	53.8	36.45
mml-miR-6827-3p	0.0849152	4.04142	0.701249	0.975136	15.06	13.77	11.66	9.19	13.23	23.55	17.67	8.97	10.36	16.64	16.42	16.47
mml-miR-590-3p	0.10291	2.58726	0.702629	0.975136	5.02	4.86	5.12	8.72	3.19	5.35	2.71	7.73	7.85	3.87	2.97	1.89
mml-miR-15a-5p	0.0825167	11.4358	0.703377	0.975136	2363.84	2327.88	2609.76	3372.18	1401.77	2740.72	1694.78	2958.91	4169.19	1903.78	1331.46	1276.07
mml-miR-3200-5p	0.0997166	2.00663	0.717403	0.980642	3.4	3.21	3.27	2.94	3.31	3.66	3.8	1.79	3.42	2.15	4.28	4.41
mml-miR-301a-3p	-0.101822	4.02013	0.721138	0.980642	12.88	14.58	9.7	18.57	8.98	14.64	12.51	16.48	24.47	14.17	12.49	5.31
mml-miR-373	0.126913	1.50768	0.728	0.980642	2.24	2.47	4.9	0.47	0.94	4.04	0.85	7.4	0.25	0.86	3.49	0.36
mml-miR-532-5p	-0.0802162	7.09714	0.730595	0.980642	115.96	124.04	90.77	119.19	144.19	125.55	100.1	135.97	125.37	132.92	157.74	68.21
mml-miR-28-3p	0.075425	7.44115	0.735461	0.980642	156.77	148.58	105.58	169.59	158.36	184.77	165.53	106.49	107.33	171.79	186.3	170.98
mml-miR-668	0.134641	0.432012	0.739133	0.980642	1.03	0.93	1.2	1.14	0.59	1.31	0.93	0.56	0.92	0.97	1.31	0.9
mml-miR-502-5p	-0.124983	1.19974	0.740172	0.980642	1.86	1.83	1.53	1.14	3.54	2.25	0.85	1.35	2.09	1.72	1.83	2.16
mml-miR-181d	0.109879	1.07419	0.74057	0.980642	1.7	1.55	1.31	3.03	0.83	2.72	0.59	0.9	2.92	0.75	2.36	0.81
mml-miR-29b-2-5p	-0.0721286	4.54653	0.741162	0.980642	19.42	20.26	15.69	27.85	17.24	20.08	16.23	19.39	30.32	17.82	16.42	17.37
mml-let-7f-3p	0.092353	5.13782	0.741542	0.980642	34.99	28.19	17	5.97	50.54	35.94	65.52	17.49	9.77	48.53	38.69	26.46
mml-miR-4796-3p	0.121433	0.707833	0.741783	0.980642	1.31	1.16	0.87	1.52	2.01	1.13	1.01	0.78	1.59	0.86	1.31	1.26
mml-miR-10b-5p	-0.0971984	2.24911	0.747084	0.980642	3.79	4.18	4.58	3.88	2.72	4.13	3.64	2.24	3.34	4.62	6.99	3.69
mml-miR-7165-3p	0.0907154	2.21983	0.747948	0.980642	4.09	3.8	2.62	1.99	6.97	3.66	5.24	1.23	2.51	5.05	5.07	5.13
mml-miR-130a-3p	0.0703484	3.92926	0.748109	0.980642	12.91	12.65	12.97	19.42	7.2	14.73	10.23	17.26	20.88	7.95	10.31	6.84
mml-miR-223	0.0842051	15.1673	0.751192	0.980642	33964.1	30906.6	21314.9	24134	35160.9	39680	49530.7	30407.1	19563.7	34782.4	36202.8	33577.2
mml-miR-7180-5p	0.091097	6.44618	0.76031	0.980642	81.51	74.44	56.22	28.61	148.21	96.37	78.12	30.6	45.27	74.3	91.71	130.31
mml-miR-27b-3p	0.0606832	8.25496	0.763808	0.980642	271.02	256.63	217.05	363.34	256.5	302.44	215.75	306.12	299.02	242.76	259.06	176.2
mml-miR-18b	-0.0694463	4.81524	0.764396	0.980642	23.13	25.25	23.86	25.49	24.92	25.24	16.15	25.67	38.51	28.78	21.14	12.15
mml-miR-16-5p	0.0991697	17.2734	0.764481	0.980642	136088	130785	132678	223245	79776.6	131174	113569	177001	220349	104843	78221.3	73510
mml-miR-1255b	0.0755558	2.78356	0.765088	0.980642	6.01	5.62	3.49	6.92	5.08	6.94	7.61	4.93	6.35	6.66	6.46	3.69
mml-miR-330-5p	-0.061114	3.00283	0.766874	0.980642	6.79	7.01	5.23	3.98	10.86	6.19	7.69	5.16	4.01	10.84	6.2	8.82
mml-miR-34a-5p	0.0772296	6.91162	0.767333	0.980642	108.37	96.36	53.28	198.2	65.54	139.26	85.56	72.08	168.64	64.74	72.32	104.03
mml-miR-181c-3p	0.0795908	1.88287	0.768973	0.980642	3.18	2.95	1.42	3.6	3.07	5.35	2.45	1.46	3.17	3.76	4.11	2.25
mml-miR-132-3p	-0.069857	3.03546	0.775347	0.981132	7.03	7.12	7.95	4.55	6.14	12.11	4.4	5.27	7.52	4.51	11.44	6.84
mml-miR-339-5p	0.0629877	14.1082	0.782291	0.981132	15861.9	15465.9	18395.1	9676.07	20864.8	16453.5	13920.2	15975.5	8813.55	22551.8	19655.9	10332.4
mml-miR-18a-3p	0.0761492	9.17913	0.783871	0.981132	531.96	498.04	577.5	192.99	860.19	613.32	415.77	255.46	286.16	490.04	556.9	901.62
mml-miR-7189-3p	0.0964457	1.29307	0.785369	0.981132	1.99	1.83	1.09	3.41	1.42	2.25	1.78	1.23	1.75	1.29	1.66	3.24
mml-miR-342-3p	0.0464468	9.872	0.787522	0.981132	837.68	812.9	600.6	1111.81	954.55	981.54	539.88	480.76	942	771.67	1247.61	622.47
mml-miR-20a-5p	0.0658457	7.24326	0.793331	0.981132	127.2	128.08	206.05	138.7	87.27	120.96	83.02	164.66	239.55	92.34	66.91	76.94
mml-miR-671-5p	-0.0598567	4.49054	0.794338	0.981132	19.64	19.97	12.75	16.39	28.58	24.4	16.06	14.46	19.29	18.68	30.22	17.19
mml-miR-501-3p	0.0961388	0.63995	0.795998	0.981132	1.28	1.13	0.44	0.85	2.48	1.6	1.01	0.9	0.67	1.72	1.48	0.9
mml-miR-1262-3p	0.0672213	3.72295	0.797745	0.981132	11.18	11.26	6.65	6.54	4.72	14.73	23.25	9.86	3.01	6.01	10.31	27.09
mml-miR-20a-3p	-0.0681249	2.72842	0.798567	0.981132	5.25	5.88	6.32	4.93	5.31	5.44	4.23	8.86	7.85	3.44	6.81	2.43
mml-miR-1284	0.0930616	1.35232	0.799162	0.981132	2.14	2.01	1.85	1.42	3.78	2.06	1.61	1.35	0.84	1.93	2.88	3.06
mml-miR-140-5p	-0.0623757	6.48448	0.801931	0.981132	73.88	80.34	67.67	84.13	80.3	73.38	63.91	93.93	108	96.74	62.36	40.68
mml-miR-138-5p	-0.0608726	3.29738	0.81274	0.981132	8.52	8.45	6.65	7.77	8.03	16.61	3.55	5.49	13.95	5.8	11.09	5.94
mml-miR-22	0.0475052	10.5595	0.815701	0.981132	1318.77	1301.41	1249.8	1244.82	1593.2	1450.54	1055.49	833.97	1950.41	1115.36	1169	1438.33
mml-miR-6529-5p	-0.0485316	7.97009	0.81662	0.981132	218.3	227.17	143.07	168.07	288.38	252.05	239.93	159.17	142.75	221.08	337.32	275.55
mml-miR-95-3p	-0.110813	1.12007	0.819121	0.981132	1.46	1.76	0.54	4.36	0.12	1.6	0.68	0.78	6.01	1.18	0.44	0.36
mml-miR-505-5p	-0.0523429	2.71254	0.819479	0.981132	5.54	5.65	5.12	5.5	5.2	8.16	3.72	5.49	4.43	5.37	8.21	4.77
mml-miR-30d-5p	-0.0459392	12.9294	0.823765	0.981132	6726.6	6933	6112.58	5837.76	8263.37	5828.64	7590.64	6499.8	4566.85	7959.14	8168.88	7470.34
mml-miR-485-3p	0.0424941	8.54823	0.827291	0.981132	335.87	332.58	291.69	247.56	318.62	499.87	321.59	318.12	184.34	403.28	505.89	251.26
mml-miR-30a-3p	0.049025	4.73041	0.828204	0.981132	24.02	22.03	12.86	22.93	14.41	35.56	34.32	14.68	26.14	14.92	28.56	25.83
mml-miR-188-5p	-0.0655378	1.27484	0.830147	0.981132	1.99	1.98	0.98	0.76	4.02	2.25	1.94	1.12	1.17	3.54	2.45	1.62
mml-miR-450a-2-3p	-0.0886577	0.54092	0.831439	0.981132	1.04	1.14	0.44	1.42	1.54	1.22	0.59	1.12	1.59	1.93	0.61	0.45
mml-miR-191-5p	0.0662586	16.4667	0.833764	0.981132	81849.1	75673.3	60085.7	72128	84412.6	66880.1	125739	88080.2	58985.8	66859.3	92406.5	72034.5
mml-miR-224-5p	0.276662	1.13559	0.842185	0.981132	1.5	1.95	4.14	2.94	0.24	0.19	0	0	0.92	0	7.77	1.08
mml-miR-17-5p	0.0426467	8.62014	0.843931	0.981132	334.03	338.37	321.98	443.68	258.86	376.2	269.43	380.22	556.62	347.02	223.86	184.12
mml-let-7c-5p	-0.0431704	7.42421	0.845387	0.981132	149.72	145.99	124.33	227.48	89.28	200.34	107.2	133.95	204.05	120.25	153.72	117.98
mml-miR-1260b	-0.047589	5.30047	0.850202	0.981132	33.62	35	37.7	25.77	39.21	36.5	28.91	24.77	28.06	32.1	39.65	50.39
mml-let-7b-3p	0.0450333	5.49707	0.851819	0.981132	40.56	41.41	22.88	11.56	70.62	46.17	51.57	23.65	8.02	70.97	64.55	39.87
mml-miR-92b-3p	-0.0500564	7.37591	0.852155	0.981132	133.57	157.2	88.59	53.06	212.33	121.71	192.16	55.37	67.91	144.95	123.07	394.7
mml-miR-215-5p	0.0763389	0.497302	0.859765	0.981132	1.05	1.04	1.09	0.95	1.18	0.84	1.18	0.22	0.84	1.29	1.66	1.17
mml-miR-450b-5p	0.0633457	0.948273	0.860386	0.981132	1.61	1.45	1.2	1.33	3.07	1.69	0.76	1.35	1.59	1.4	2.1	0.81
mml-miR-362-3p	0.0728817	0.264382	0.862395	0.981132	0.92	0.85	1.2	0.47	1.18	1.22	0.51	0.9	0.33	1.07	1.22	0.72
mml-miR-7194-3p	0.0512936	2.20876	0.863801	0.981132	4.14	3.72	1.63	1.71	4.61	6.47	6.26	1.79	3.01	5.48	5.15	3.15
mml-miR-210-5p	-0.0513366	1.32018	0.871178	0.981132	2.03	2.01	2.29	1.52	3.31	1.78	1.27	1.46	2	2.25	2.71	1.62
mml-miR-6827-5p	-0.0645759	0.575242	0.871507	0.981132	1.08	1.1	0.44	1.23	0.59	2.06	1.1	0.67	1.84	0.86	1.22	0.9
mml-miR-6529-3p	0.0361686	4.72013	0.872891	0.981132	24.16	22.41	16.78	9.76	38.38	22.9	32.97	15.92	13.03	37.69	21.92	23.49
mml-miR-7194-5p	0.0694292	0.606432	0.874141	0.981132	1.17	1.1	0.22	1.42	1.3	1.31	1.61	0.9	0.67	0.86	2.1	0.99
mml-miR-605	-0.070657	0.675984	0.875877	0.981132	1.19	1.25	1.31	0.57	0.94	2.44	0.68	0.22	0.67	1.29	2.27	1.8
mml-miR-106a-5p	0.0409441	6.28924	0.880109	0.981132	65.42	67.77	64.51	86.78	48.65	75.26	51.91	75.66	118.36	71.08	40.27	33.48
mml-miR-1255a-3p	0.036724	3.19573	0.880744	0.981132	8.25	7.44	6.54	3.51	9.92	7.32	13.95	8.97	5.1	8.7	7.25	7.2
mml-miR-1-3p	-0.0694792	1.15122	0.883924	0.981132	1.58	1.8	1.42	0.85	0.59	2.25	2.79	0.9	4.43	0.75	1.66	1.26
mml-miR-423-3p	-0.038417	12.4436	0.886351	0.981132	4799.57	5023.38	5332.08	3207.89	6850.02	5168.68	3439.19	2773.06	3669.04	4708.4	6039.1	7927.31
mml-miR-140-3p	0.0302927	13.0695	0.888122	0.981132	7677.29	7403.84	6695.31	5699.62	9815	6385.1	9791.4	7762.86	4920.84	8998.27	8643.5	6693.72
mml-miR-125a-5p	0.0255684	8.67302	0.890257	0.981132	363.83	362.2	352.71	245.67	235.12	550.26	435.38	365.65	204.47	265.96	648.7	326.22
mml-miR-502-3p	-0.0314513	4.6649	0.892567	0.981132	22.55	22.39	19.94	15.73	30.94	31.25	14.88	14.91	20.05	24.16	32.93	19.89
mml-miR-93-5p	0.0379971	15.6338	0.895638	0.981132	43066.5	43394	38459	63824.2	31616	43639.7	37793.4	49775.4	72264	41911.1	28332.5	24687.1
mml-miR-211	-0.0369191	2.74242	0.895846	0.981132	6.16	5.19	5.23	0.57	7.56	3.66	13.78	4.26	2	7.84	4.19	7.65
mml-miR-221-5p	-0.027592	3.21184	0.89803	0.981132	7.76	7.97	7.08	8.24	6.5	10.89	6.09	6.84	11.78	4.62	9.87	6.75
mml-miR-25	-0.0335757	16.0554	0.902535	0.982746	58498.5	59421.8	50729.1	64413.5	65320.7	55895.1	56134.1	62291.2	63792.9	69975.2	50913.8	50136.1
mml-miR-30b-3p	-0.0421753	0.70428	0.91531	0.982746	1.22	1.26	0.76	1.8	1.54	1.22	0.76	0.56	0.92	1.4	2.27	1.17
mml-miR-339-3p	-0.017945	9.32735	0.916406	0.982746	571.98	562.33	822.67	326.96	712.81	610.7	386.77	652.49	384.13	595.05	798.06	381.92
mml-miR-1296-5p	0.0265046	7.01951	0.916593	0.982746	111.12	119	63.09	92.56	162.61	125.46	111.85	33.4	86.78	153.54	138.96	182.32
mml-miR-4446-5p	-0.0294721	2.01052	0.918622	0.982746	3.38	3.36	2.4	3.41	2.72	6.19	2.2	1.91	2.42	3.54	5.07	3.87
mml-miR-125b-5p	-0.0198695	9.01867	0.921938	0.982746	461.39	470.99	393.68	262.25	280.47	830.09	540.47	493.99	335.02	283.89	953.53	288.51
mml-miR-551a	0.0330199	1.18784	0.92453	0.982746	1.81	1.78	0.11	1.52	0.71	3.94	2.79	0.34	1.09	0.75	4.45	2.25
mml-miR-484	-0.0282901	13.4626	0.925061	0.982746	10154.1	9937.13	12110.3	4060.1	15818.1	11244.9	7537.04	5482.45	6613.65	9451.8	13285.7	14852
mml-miR-3122	-0.0176023	3.96498	0.931149	0.982746	13.37	13.49	11.55	12.89	16.3	15.48	10.65	11.43	18.96	14.07	12.75	10.26
mml-miR-5697-3p	-0.0270448	1.68029	0.934361	0.982746	2.71	2.58	2.29	1.14	5.08	2.35	2.71	3.59	2.51	3.01	1.75	2.07
mml-miR-26a-1-3p	-0.0201823	2.27448	0.936759	0.982746	4.06	4	5.34	2.18	4.49	2.72	5.58	4.82	2.84	5.48	2.71	4.14
mml-miR-181b-5p	-0.0219447	5.85061	0.938536	0.982746	49.75	49.92	52.85	64.43	42.04	67.47	21.98	35.42	75.92	27.16	61.49	49.59
mml-miR-660-5p	-0.0176793	5.69055	0.938897	0.982746	44.7	45.55	38.25	42.73	50.66	52.55	39.31	51.34	45.35	48.21	55.2	27.63
mml-miR-106b-5p	-0.0196946	6.62373	0.942382	0.982746	80.66	86.53	102.21	100.52	63.18	81.36	56.05	92.14	152.6	91.69	41.84	54.35
mml-miR-371-5p	-0.0279075	0.768594	0.942736	0.982746	1.33	1.33	3.27	0.47	0.59	1.88	0.42	2.58	0.58	0.21	2.71	0.54
mml-miR-7172-3p	0.0251484	0.751356	0.943084	0.982746	1.3	1.25	1.09	0.76	1.42	1.22	2.03	0.9	0.84	1.07	1.83	1.62
mml-miR-6790-3p	-0.0146729	4.13935	0.945965	0.982746	15.89	15.19	8.72	9.28	27.4	15.95	18.09	10.54	11.03	22.44	17.99	13.95
mml-miR-671-3p	0.0146791	7.6554	0.94784	0.982746	177.54	177.47	174.56	119.66	234.42	173.22	185.82	108.06	127.46	204.97	208.49	238.39
mml-miR-500a-5p	0.0150212	3.60847	0.953043	0.985349	10.98	10.2	12.42	5.87	15.35	13.79	7.44	7.62	10.94	10.52	10.92	10.98
mml-miR-664	-0.01169	3.10015	0.956552	0.986191	7.52	7.32	7.08	2.84	9.45	9.76	8.45	7.4	3.59	6.55	9.7	9.36
mml-miR-130b-5p	0.0102466	5.74856	0.966273	0.993416	48.14	46.22	57.31	26.81	68.14	51.24	37.2	40.58	29.65	55.3	46.55	59.03
mml-miR-769-5p	0.00838826	2.00982	0.974166	0.996093	3.45	3.45	1.53	1.42	6.73	4.04	3.55	1.46	1.34	7.19	4.11	3.15
mml-miR-331-3p	0.00409672	11.3851	0.979985	0.996093	2350.5	2337.16	2019.29	1447.48	3064.06	1811.63	3410.03	1820.16	1332.82	3542.57	2005.06	2985.18
mml-miR-374b-3p	0.00851001	0.303038	0.98581	0.996093	0.9	0.88	0.54	1.71	0.71	0.84	0.68	1.35	0.67	0.97	0.87	0.54
mml-miR-185-5p	-0.00293061	11.8076	0.986071	0.996093	3149.63	3109.83	2280.48	3105.76	3375.47	3421.98	3564.48	2389.48	3549.18	3059.19	3429.98	3121.34
mml-let-7e-5p	0.00369784	5.22041	0.987051	0.996093	32.33	30.97	27.24	52.01	20.08	35.28	27.05	30.49	44.19	24.8	27.95	27.45
mml-miR-15b-3p	0.0028954	11.1448	0.988236	0.996093	2086.6	1937.45	1700.03	797.45	3239.78	1817.54	2878.18	1948.39	1039.64	2720.76	2294.42	1684
mml-miR-584-3p	-0.00265445	4.14981	0.99126	0.996093	15.16	15.64	11.99	16.39	15.82	17.55	14.03	7.85	12.61	18.25	19.13	20.34
mml-miR-151-5p	-0.002363	6.3059	0.991621	0.996093	70.39	68.41	43.26	61.87	83.61	74.98	88.26	53.13	62.98	79.78	79.83	66.32
mml-miR-122a-5p	-0.00546196	6.49632	0.993372	0.996093	96.71	57.12	336.59	72	32.71	30.68	11.58	13.9	75.92	20.83	142.81	32.13
mml-miR-20b-5p	5.81919e-05	4.89782	0.999621	0.999621	25.62	25.97	22.56	23.02	26.45	33.5	22.57	28.36	35.5	28.35	22.45	15.21

## Sheet: G. PairedDE_miRNA_Grp6_Grp2
PairedDE_miRNA_Group6_vs_Group2_1
names	logFC	logCPM	PValue	FDR	Group6	Group2	Group6:5	Group6:9	Group6:17	Group6:21	Group6:29	Group2:4	Group2:7	Group2:13	Group2:19	Group2:27
mml-miR-146b-5p	1.139	3.04066	4.17747e-05	0.0153731	9.7	4.54	4.97	11.66	7.52	14.6	9.76	2.13	6.6	4.19	6.55	3.24
mml-miR-33b-5p	-1.03684	1.32117	0.00282845	0.347812	1.3	2.71	1.95	1.35	0.66	1.84	0.69	4.26	2.09	2.68	2.79	1.71
mml-miR-100-5p	1.16576	1.1295	0.00283542	0.347812	2.38	1.07	0.49	4.65	2.43	2.27	2.07	0.11	1.42	0.64	1.92	1.26
mml-miR-9-3p	1.32572	0.493303	0.00634074	0.524957	1.64	0.54	0.39	0.34	0.55	5.3	1.64	0.22	0.25	0.64	1.22	0.36
mml-let-7b-5p	-1.02418	12.6254	0.00713257	0.524957	3967.25	6860.17	6813.76	6362.84	1326.32	3522.79	1810.54	8255.5	7184.97	5717.46	7981	5161.89
mml-miR-9-5p	0.815245	3.03104	0.00894099	0.540997	9.62	4.72	3.12	6.42	3.87	22.06	12.61	3.03	4.68	3.11	8.56	4.23
mml-miR-184	-1.26677	0.446203	0.0102907	0.540997	0.53	1.48	0.39	0.68	0.22	0.65	0.69	0.56	0.67	2.68	0.96	2.52
mml-miR-342-3p	0.420938	10.1193	0.0169597	0.780144	1192.92	812.9	561.06	941.92	915.47	2719.97	826.16	480.76	942	771.67	1247.61	622.47
mml-miR-23a-3p	0.411137	11.2314	0.0218022	0.829827	2425.85	1828.28	1320.19	1918.06	3134.38	2877.72	2878.87	1214.86	1403.82	1839.47	2341.76	2341.48
mml-miR-151-3p	0.355048	10.1709	0.0251114	0.829827	1175.77	867.74	533.58	623.36	1516.32	1386.15	1819.44	602.27	612.16	1244.96	907.32	971.99
mml-miR-582-3p	0.734095	2.55795	0.0262414	0.829827	6.43	3.4	1.07	2.28	7.3	1.62	19.86	1.57	0.84	4.19	1.14	9.27
mml-miR-4766-3p	0.584857	4.44026	0.0285949	0.829827	23.71	14.82	6.92	11.49	40.26	22.92	36.96	9.98	6.26	24.7	19.48	13.68
mml-miR-496	0.798171	0.658077	0.0293145	0.829827	1.54	0.87	0.58	1.44	2.21	1.84	1.64	0.56	1	0.86	1.22	0.72
mml-miR-197-3p	-0.459165	11.4543	0.0378019	0.836109	2065.61	2851.15	1066.27	1622.81	3356.22	1977.27	2305.5	1828.79	1964.27	3064.67	2813.16	4584.86
mml-miR-432-5p	-0.529855	5.35218	0.0400074	0.836109	29.26	41.26	39.77	38.52	13.71	32.98	21.33	46.07	44.85	35.43	53.19	26.73
mml-miR-142-5p	-0.718849	12.5922	0.0449042	0.836109	4194.83	6798.59	2418.34	2082.87	3083.73	6659.8	6729.43	8914.05	3338.19	5991.04	11207.2	4542.48
mml-miR-194-5p	0.533022	8.52071	0.0449857	0.836109	380.33	261.63	266.69	293.73	409.63	394.87	536.76	221.49	243.81	327.16	236.35	279.33
mml-miR-128a-5p	-0.813347	0.804892	0.0458426	0.836109	0.96	1.72	1.36	1.1	0.44	1.3	0.6	1.35	1.84	2.58	1.48	1.35
mml-miR-3146	0.64464	1.60916	0.046814	0.836109	3.11	2	2.34	0.84	3.65	6.38	2.33	2.02	0.84	1.72	4.28	1.17
mml-miR-501-5p	0.94739	0.24336	0.0469028	0.836109	1.18	0.58	0.29	0.42	2.65	1.41	1.12	0.45	0.25	0.54	1.31	0.36
mml-miR-31-5p	0.673819	1.23506	0.0514152	0.836109	2.34	1.47	1.36	2.96	1.22	5.19	0.95	0.9	2.34	0.86	2.71	0.54
mml-miR-26a-5p	0.544866	12.2256	0.0547419	0.836109	4822.53	3396.29	5011.94	6968.88	4277.67	3296.38	4557.8	3774.16	4850.84	1991.5	2998.94	3366.03
mml-miR-16-1-3p	-0.67669	2.69136	0.0571863	0.836109	4.04	6.73	7.12	4.56	1.55	3.78	3.2	9.42	9.02	6.76	6.46	1.98
mml-miR-10b-5p	0.570213	2.58155	0.0608457	0.836109	6.09	4.18	2.63	8.7	7.3	6.05	5.79	2.24	3.34	4.62	6.99	3.69
mml-miR-139-5p	0.70942	0.988607	0.0626774	0.836109	1.91	1.19	0.49	2.53	1	2.7	2.85	0.34	0.67	1.07	2.27	1.62
mml-miR-500b-5p	0.574313	3.61832	0.0651645	0.836109	13.12	8.28	7.41	14.7	26.1	8.33	9.07	5.6	8.52	7.62	12.93	6.75
mml-miR-92b-5p	-0.720449	1.35378	0.0676979	0.836109	1.65	2.5	0.19	0.84	1.44	3.35	2.42	1.35	1	3.22	2.71	4.23
mml-miR-361-5p	0.37296	11.4648	0.0687018	0.836109	2877.93	2157.39	1303.43	2244.56	3852.67	3572.75	3416.23	1397.68	2072.52	2206.78	2874.21	2235.74
mml-miR-769-5p	0.554157	2.29855	0.0721339	0.836109	5.06	3.45	1.07	2.87	9.95	6.49	4.92	1.46	1.34	7.19	4.11	3.15
mml-miR-624	0.726071	0.335253	0.0736303	0.836109	1.13	0.71	0.78	1.1	0.88	1.41	1.47	0.34	0.5	0.75	1.22	0.72
mml-miR-584-5p	-0.390603	9.25432	0.0749759	0.836109	473.6	595.65	487.66	961.18	276.48	409.57	233.1	392.88	1033.3	470.71	690.36	391.01
mml-let-7b-3p	-0.66227	5.40187	0.0756028	0.836109	35.59	41.41	3.22	5.66	51.98	85.31	31.78	23.65	8.02	70.97	64.55	39.87
mml-miR-148b-5p	0.387642	4.12742	0.0772176	0.836109	16.75	12.92	18.23	19.77	17.25	11.14	17.36	14.35	15.7	12.45	10.22	11.88
mml-miR-16-2-3p	-0.829507	6.68099	0.079439	0.836109	62.27	125.22	23.98	32.1	97.21	79.04	79.02	132.61	43.02	114.03	286.31	50.13
mml-miR-30b-5p	0.346078	10.4239	0.0795213	0.836109	1389.6	1042.54	676.08	779.64	1615.63	1597.32	2279.33	993.92	689.76	1592.3	1082.36	854.38
mml-miR-192-3p	0.532692	1.73949	0.0841645	0.856194	3.22	2.33	1.95	1.86	4.31	4	3.97	1.91	0.84	3.87	2.53	2.52
mml-miR-296-5p	-0.270656	9.93994	0.0880587	0.856194	792.27	939.98	506.96	583.57	1012.24	1004.26	854.32	846.63	915.36	950.44	1120.97	866.52
mml-miR-338-3p	0.486327	4.71729	0.08842	0.856194	25.82	18.9	29.63	34.38	18.91	25.63	20.55	14.46	22.3	18.36	13.28	26.1
mml-miR-532-3p	-0.314447	9.38856	0.0911526	0.856194	525.96	648.89	405.4	297.19	632.91	739.14	555.15	600.59	429.74	890.31	658.57	665.21
mml-miR-206	-0.711116	1.55004	0.0930646	0.856194	1.87	2.72	3.9	2.7	0.88	0.76	1.12	2.24	3.42	2.04	2.01	3.87
mml-miR-30c-2-3p	-0.565675	2.0018	0.09571	0.859055	2.9	3.87	1.07	1.52	0.77	6.7	4.4	1.46	3.68	2.04	7.95	4.23
mml-miR-24-3p	0.276851	9.81028	0.0990239	0.863373	843.92	719.38	831.65	921.48	915.7	866.61	684.18	505.31	954.28	765.44	734.56	637.32
mml-miR-501-3p	0.578286	0.82949	0.107422	0.863373	1.65	1.13	0.68	1.69	1.77	2.38	1.73	0.9	0.67	1.72	1.48	0.9
mml-miR-628-3p	0.402281	3.5563	0.108378	0.863373	11.21	8.79	12.57	13.6	6.86	11.89	11.14	6.84	12.53	5.05	11.18	8.37
mml-miR-221-3p	-0.484597	11.8589	0.110714	0.863373	2870.57	3473.09	4685.99	5521.1	1532.46	1523.9	1089.4	3248.89	5663.96	2175.32	3778.56	2498.69
mml-miR-877-3p	-0.496989	3.45929	0.11176	0.863373	8.76	10.38	2.14	4.05	20.9	7.57	9.15	6.95	5.6	13.31	11.01	15.03
mml-miR-144	-0.650306	6.80402	0.112744	0.863373	71.56	121.1	74.67	112.69	39.92	61.96	68.57	217.24	115.77	76.77	142.2	53.54
mml-miR-99a-5p	0.446508	4.89784	0.114727	0.863373	29.32	24.39	13.35	24.5	25.77	54.82	28.15	18.61	14.45	8.7	59.57	20.61
mml-miR-194-3p	-0.596262	1.05677	0.11496	0.863373	1.36	1.97	0.68	1.01	1.44	2.81	0.86	1.46	1.75	3.01	2.01	1.62
mml-miR-186-5p	0.33153	11.4683	0.121371	0.893287	2872.57	2150.73	1278.67	1598.48	4397.99	3308.49	3779.22	1813.66	1352.03	2895.88	2415.22	2276.86
mml-miR-450a-1-3p	-0.557173	2.18595	0.124587	0.898978	3.24	4.2	6.53	5.24	1.77	2.16	0.52	4.71	6.35	3.11	5.42	1.44
mml-miR-23b-5p	-0.43487	3.01283	0.13035	0.917878	5.82	7.78	8.58	6.08	3.32	5.84	5.27	7.85	7.68	7.62	9.26	6.48
mml-miR-23b-3p	0.248722	9.73879	0.132194	0.917878	826.41	690.97	468.85	562.53	1127.48	1090.22	882.99	601.26	459.64	653.03	1043.75	697.16
mml-miR-7184-3p	-0.68547	0.983706	0.144432	0.928566	1.23	1.91	1.36	0.68	2.1	1.84	0.17	0.9	1	2.25	3.23	2.16
mml-miR-376c-5p	0.627038	0.961626	0.144926	0.928566	1.82	1.28	0.97	0.93	1.66	3.14	2.42	0.78	0.67	3.11	1.05	0.81
mml-miR-1240	-0.372501	3.74811	0.14607	0.928566	10.48	12.82	6.82	4.56	7.74	13.95	19.35	8.97	7.6	15.78	15.55	16.2
mml-miR-18a-5p	-0.371924	3.75981	0.146659	0.928566	9.97	13.08	12.18	13.43	8.07	5.95	10.19	16.93	13.61	13.96	13.36	7.56
mml-miR-628-5p	0.487904	2.36091	0.152449	0.928566	5.05	3.35	6.53	9.29	2.21	2.7	4.49	2.35	4.93	2.36	3.41	3.69
mml-miR-130b-5p	-0.369068	5.55076	0.153167	0.928566	35.24	46.22	26.22	27.71	51.09	32.76	38.43	40.58	29.65	55.3	46.55	59.03
mml-miR-940	-0.836372	0.388444	0.159739	0.928566	0.84	1.1	0	1.27	2.21	0.54	0.17	0.56	0.75	1.18	1.4	1.62
mml-miR-381-3p	0.367942	5.14803	0.160336	0.928566	36.43	26.45	14.33	24.75	60.16	36.01	46.9	18.94	25.56	34.57	33.02	20.16
mml-miR-7205-3p	-0.364925	5.62661	0.1631	0.928566	37.69	47.71	19.59	17.66	47.78	26.38	77.04	27.69	24.72	47.89	40.35	97.91
mml-miR-337-5p	-0.440706	2.63369	0.165707	0.928566	4.31	6.1	5.56	5.66	2.43	4.97	2.94	5.6	9.77	6.66	5.68	2.79
mml-miR-6827-3p	-0.315737	3.8366	0.166224	0.928566	11.1	13.77	6.63	7.27	12.61	14.49	14.51	8.97	10.36	16.64	16.42	16.47
mml-miR-143-3p	-0.649106	2.41811	0.170964	0.928566	3.75	5.36	1.66	10.56	2.43	1.84	2.25	1.12	4.59	7.52	9	4.59
mml-miR-19b	0.462901	12.3603	0.171019	0.928566	5497.05	3865.98	2670.41	3215.72	5962.31	7971.88	7664.93	4467.22	2859.84	4346.99	5371.53	2284.33
mml-miR-296-3p	-0.355711	3.93438	0.17163	0.928566	12.34	14.73	3.22	11.74	10.62	24.22	11.92	6.17	11.69	17.18	20.26	18.36
mml-miR-29b-3p	0.436435	8.23843	0.175637	0.928566	299.55	221.88	264.16	263.99	208.69	304.37	456.52	310.61	227.36	217.21	183.86	170.35
mml-miR-4446-3p	-0.450382	1.6612	0.175817	0.928566	2.26	2.99	1.36	2.28	1	4.76	1.9	2.13	2.51	3.11	5.07	2.16
mml-miR-183-5p	-0.464803	3.14465	0.176629	0.928566	6.79	8.21	4.68	19.68	2.32	3.14	4.15	3.03	17.12	4.51	9.08	7.29
mml-miR-362-5p	0.332349	4.83594	0.182102	0.936479	28.96	21.83	10.04	28.89	49.77	28.54	27.55	13.45	18.96	25.23	32.06	19.44
mml-miR-192-5p	0.340267	9.08205	0.183567	0.936479	565.57	406.53	159.37	215.42	781.33	782.6	889.12	322.15	152.94	648.62	515.68	393.26
mml-miR-195-5p	0.512408	1.32692	0.186785	0.936479	2.35	1.59	3.22	4.31	0.55	1.84	1.81	2.8	1.59	1.5	1.05	0.99
mml-miR-4677-5p	0.529925	0.476258	0.189754	0.936479	1.24	0.85	0.58	1.1	1.99	0.86	1.64	0.9	0.75	1.18	0.96	0.45
mml-miR-152-3p	0.352496	3.44962	0.190859	0.936479	10.33	7.85	18.62	11.49	2.1	12.11	7.34	13.23	5.93	2.79	11.09	6.21
mml-miR-1185-3p	0.4898	1.04636	0.201498	0.937178	1.82	1.4	1.85	1.77	1.66	2.27	1.55	1.91	2.42	1.18	0.79	0.72
mml-miR-187-3p	-0.228238	9.76938	0.201652	0.937178	706.37	817.89	781.75	356.75	537.47	968.58	887.31	837.22	529.14	988.99	1072.23	661.88
mml-miR-127-3p	-0.365775	2.59745	0.204043	0.937178	4.42	5.86	4.19	3.89	3.54	6.05	4.4	4.37	6.93	5.48	8.21	4.32
mml-miR-30e-5p	0.258506	10.5685	0.206909	0.937178	1464.39	1205.28	835.84	1077.26	1867	1464.97	2076.89	1522.89	1009.41	1283.4	1351.81	858.87
mml-miR-106b-3p	-0.285694	11.4202	0.208254	0.937178	2175.47	2621.21	1458.71	3142.9	2730.5	1918.66	1626.59	2040.42	2822.67	2247.69	2781.8	3213.49
mml-miR-200a-3p	-0.547575	0.447158	0.210164	0.937178	0.83	1.12	0.39	2.2	0.11	0.76	0.69	0.34	2.17	0.97	0.96	1.17
mml-miR-1260b	-0.332707	5.18419	0.217221	0.937178	28.61	35	12.96	29.31	45.9	24.22	30.66	24.77	28.06	32.1	39.65	50.39
mml-miR-550-3p	-0.477622	2.06485	0.220996	0.937178	2.99	4.05	1.27	3.72	4.87	3.35	1.73	3.59	2	4.29	5.33	5.04
mml-miR-101-3p	-0.309606	10.0293	0.22433	0.937178	841.51	918.82	1455	1621.21	192.1	417.68	521.56	1343.32	1490.52	739.24	681.1	339.9
mml-miR-27b-3p	0.338144	8.3737	0.232112	0.937178	315.67	256.63	346.62	322.79	242.64	325.67	340.62	306.12	299.02	242.76	259.06	176.2
mml-miR-485-3p	-0.337287	8.39856	0.235268	0.937178	267.37	332.58	201.19	123.84	247.61	464.93	299.25	318.12	184.34	403.28	505.89	251.26
mml-miR-28-5p	0.436985	1.56632	0.236664	0.937178	2.78	2.05	1.75	4.39	3.43	2.7	1.64	1.23	1.5	2.04	3.14	2.34
mml-let-7e-5p	-0.353827	5.09934	0.237081	0.937178	27.13	30.97	41.72	44.18	8.29	22.71	18.74	30.49	44.19	24.8	27.95	27.45
mml-miR-421	0.434936	6.58433	0.244201	0.937178	95.95	71.15	91.33	81.18	66.35	130.94	109.94	76.78	70.25	66.68	88.13	53.9
mml-miR-199a	0.30357	3.9977	0.245207	0.937178	16.19	11.91	4.87	4.14	16.04	25.52	30.4	5.83	4.01	17.82	13.36	18.54
mml-miR-335-5p	0.330928	4.20783	0.248922	0.937178	18.45	14.94	6.04	15.04	13.49	38.49	19.17	11.21	8.77	14.6	33.37	6.75
mml-miR-33a	-0.468392	0.793945	0.249478	0.937178	1.04	1.68	0.88	0.42	0.88	1.73	1.3	3.03	0.42	1.29	3.06	0.63
mml-miR-146a-5p	0.343672	8.31607	0.251895	0.937178	310.36	238.63	410.46	469.53	162.46	328.16	181.19	224.97	350.56	193.7	280.55	143.36
mml-miR-133c-3p	-0.414663	3.15632	0.258329	0.937178	6.87	8.21	4.58	3.29	16.26	3.03	7.17	6.61	11.69	8.91	3.49	10.35
mml-miR-874-3p	-0.454052	0.903946	0.258527	0.937178	1.32	1.62	0.58	1.1	0.66	3.57	0.69	0.67	2.17	1.4	2.62	1.26
mml-miR-376a-1-5p	0.440456	0.432731	0.258755	0.937178	1.17	0.84	0.49	0.76	1.66	1.3	1.64	0.78	0.58	0.97	0.87	0.99
mml-miR-21-5p	0.232926	9.45475	0.259761	0.937178	671.71	546.01	643.23	1342.43	445.13	378.76	549.02	636.46	698.02	383.42	666.69	345.48
mml-miR-181a-5p	-0.530469	7.17111	0.260854	0.937178	102.99	149.04	116.38	187.88	71.55	101.74	37.4	109.07	173.15	61.95	237.22	163.78
mml-miR-494-3p	0.292829	5.38167	0.262605	0.937178	40.18	33.85	24.86	29.65	43.13	61.96	41.28	34.86	27.73	33.28	55.46	17.91
mml-miR-101-1-5p	-0.365977	1.32187	0.269377	0.937178	1.69	2.26	2.44	2.87	1.11	1.08	0.95	3.47	3.26	1.93	1.92	0.72
mml-miR-1226	-0.379737	7.78936	0.270864	0.937178	172.27	218.84	96.6	82.53	210.57	216.68	254.95	146.39	131.05	325.33	238.45	252.96
mml-miR-376a-3p	0.299529	4.34189	0.27168	0.937178	20	16.16	8.29	15.12	23.67	36.01	16.93	16.48	11.11	17.07	27.69	8.46
mml-miR-29c-3p	-0.24269	9.45551	0.27344	0.937178	548.58	652.92	698.01	907.37	240.87	452.39	444.26	850.89	986.69	645.94	459.16	321.9
mml-miR-4446-5p	-0.326912	1.84743	0.276826	0.937178	2.64	3.36	1.46	2.11	2.65	4.22	2.76	1.91	2.42	3.54	5.07	3.87
mml-miR-493-5p	0.362356	3.29707	0.289828	0.937178	9.95	6.34	12.67	25.6	2.99	4.43	4.06	5.49	11.94	3.22	4.19	6.84
mml-miR-365-3p	0.262474	3.48063	0.290519	0.937178	10.73	8.88	6.34	7.43	12.72	19.03	8.12	6.5	7.43	12.24	12.75	5.49
mml-miR-320b	-0.329562	5.364	0.292935	0.937178	31.62	40.21	23.88	47.48	38.71	27.9	20.12	29.82	39.09	26.41	53.72	52.01
mml-miR-374a-5p	0.426103	6.88855	0.294765	0.937178	122.78	79.06	136.46	258.5	42.69	56.87	119.36	106.38	104.66	53.69	64.98	65.6
mml-miR-433-3p	-0.426518	0.377439	0.295738	0.937178	0.82	1.06	0.19	0.84	0.55	0.76	1.73	0.56	0.75	0.97	1.31	1.71
mml-miR-942-3p	0.299752	2.71346	0.30049	0.937178	6.08	5.04	4.78	4.39	7.19	6.81	7.25	5.6	4.26	7.09	4.19	4.05
mml-miR-664	-0.292255	2.94542	0.300495	0.937178	5.86	7.32	3.61	3.8	7.63	6.49	7.77	7.4	3.59	6.55	9.7	9.36
mml-miR-500a-5p	0.312187	3.81977	0.301659	0.937178	14.37	10.2	6.73	16.73	29.97	10.49	7.95	7.62	10.94	10.52	10.92	10.98
mml-miR-7186-3p	0.363339	6.07421	0.30251	0.937178	66.49	53.33	35.87	36.24	100.86	92.99	66.5	56.72	34.33	85.9	68.04	21.69
mml-miR-374b-5p	0.390463	7.07211	0.302581	0.937178	131.12	99.14	132.37	214.07	82.5	68.98	157.7	112.88	163.29	69.25	68.39	81.89
mml-miR-1-3p	-0.6085	1.23061	0.303836	0.937178	1.75	1.8	3.8	3.89	0.11	0.11	0.86	0.9	4.43	0.75	1.66	1.26
mml-miR-30c-1-3p	-0.260379	5.02134	0.303891	0.937178	25.98	30.58	26.12	19.43	24.33	41.52	18.48	27.13	29.74	36.08	34.76	25.2
mml-miR-493-3p	-0.37345	2.33344	0.305143	0.937178	3.75	4.52	6.53	6	1.22	2.59	2.42	3.47	7.43	3.22	5.59	2.88
mml-miR-142-3p	0.492889	13.7023	0.306884	0.937178	14490.3	9272.48	4511.12	9036.12	19603.1	16009.1	23292	8118.19	6378.69	12118.5	10727.7	9019.26
mml-let-7i-5p	-0.535327	13.5648	0.310651	0.937178	9460.5	10632.1	21077.5	14184.5	1738.72	4783.63	5518.17	13112.9	15865.2	9640.99	6587.88	7953.59
mml-miR-431	-0.25311	4.49986	0.314966	0.937178	18.14	21.45	14.62	26.69	20.46	19.68	9.24	16.48	24.89	18.68	30.74	16.47
mml-miR-320a	-0.25404	11.4475	0.318226	0.937178	2211.11	2685.87	1685.92	2987.8	2733.15	2108.1	1540.57	2213.49	2713.58	1694.19	3581.43	3226.63
mml-miR-1180-3p	-0.299454	8.74941	0.319094	0.937178	328.66	421.35	283.85	448.91	394.48	285.45	230.59	263.87	415.29	319.53	493.05	615
mml-miR-28-3p	0.365576	7.62723	0.32237	0.937178	201.78	148.58	120.38	113.54	170.64	358.22	246.14	106.49	107.33	171.79	186.3	170.98
mml-miR-29c-5p	0.283417	5.93616	0.32281	0.937178	60.57	47.99	24.86	37.59	104.4	63.36	72.63	26.9	32.66	74.09	52.23	54.08
mml-miR-182	0.218013	5.08843	0.328704	0.937178	32.31	27.83	14.91	47.73	23.22	37.41	38.26	14.46	39.17	21.69	37.56	26.28
mml-miR-7180-3p	-0.225755	4.39626	0.330414	0.937178	16.96	20.03	9.16	15.97	20.79	22.38	16.5	11.21	18.04	23.08	25.07	22.77
mml-miR-1306-5p	-0.358549	7.62856	0.330904	0.937178	154.98	190.81	103.62	69.19	180.26	216.36	205.46	175.76	116.6	214.53	192.68	254.49
mml-miR-132-3p	0.311294	3.20043	0.33289	0.937178	8.75	7.12	5.65	11.4	12.61	8.11	5.96	5.27	7.52	4.51	11.44	6.84
mml-miR-340-5p	-0.366927	7.64683	0.333185	0.937178	145.77	213.35	133.25	167.94	81.06	245.55	101.05	258.04	131.8	147.63	453.05	76.22
mml-miR-361-3p	-0.233596	11.5852	0.333678	0.937178	2532.98	2927.39	1547.6	1341.25	2670.56	4033.57	3071.9	2832.13	1914.33	4301.89	3604.75	1983.85
mml-miR-30d-3p	0.244647	3.46446	0.344597	0.937178	9.95	8.59	13.65	9.88	7.3	7.78	11.14	10.76	11.36	7.73	7.51	5.58
mml-miR-627-5p	0.354229	6.4977	0.351406	0.937178	86.64	68.2	116.77	77.8	47.55	110.94	80.15	92.03	62.14	69.9	75.9	41.04
mml-miR-423-5p	-0.251172	11.9427	0.353807	0.937178	3194.7	3754.1	1801.62	2453.31	3925.33	4555.59	3237.63	3329.71	3185.34	2766.61	4930.71	4558.14
mml-miR-424-3p	-0.260041	5.09317	0.357774	0.937178	28.48	30.8	31.78	44.86	25.44	34.71	5.61	31.61	39.84	29.53	38.08	14.94
mml-miR-889-3p	0.336485	1.55609	0.35954	0.937178	2.65	2.15	1.66	3.04	1.55	4.22	2.76	3.7	1.84	1.61	2.27	1.35
mml-let-7f-3p	-0.319951	5.0231	0.361275	0.937178	30.29	28.19	3.8	5.32	47.66	42.49	52.16	17.49	9.77	48.53	38.69	26.46
mml-miR-7165-3p	-0.279867	2.05737	0.363	0.937178	3.23	3.8	0.68	2.37	5.75	3.14	4.23	1.23	2.51	5.05	5.07	5.13
mml-miR-337-3p	-0.288533	2.77876	0.364802	0.937178	5.48	6.34	2.14	3.38	5.86	7.03	8.98	5.49	4.59	9.13	7.16	5.31
mml-miR-10a-5p	0.26232	5.80643	0.368738	0.937178	55.28	44.14	20.18	47.31	61.05	63.14	84.72	31.61	29.9	49.71	60.35	49.14
mml-miR-584-3p	0.214183	4.26284	0.370802	0.937178	18.14	15.64	7.31	18.16	21.01	24.76	19.43	7.85	12.61	18.25	19.13	20.34
mml-miR-485-5p	-0.327336	1.50889	0.375712	0.937178	1.93	2.7	1.85	2.45	1.88	1.84	1.64	2.35	1.5	1.61	5.42	2.61
mml-miR-3140	0.261632	2.15937	0.381822	0.937178	4	3.39	4.29	4.05	3.32	3.68	4.66	2.58	3.76	3.54	3.93	3.15
mml-miR-150-3p	-0.317451	2.14403	0.382879	0.937178	3.42	4.01	2.44	2.53	2.88	7.35	1.9	2.35	4.68	3.11	5.24	4.68
mml-miR-4796-3p	-0.343179	0.522703	0.387542	0.937178	0.93	1.16	1.27	1.52	0.33	0.76	0.78	0.78	1.59	0.86	1.31	1.26
mml-miR-185-3p	-0.243021	4.13637	0.391244	0.937178	13.22	16.92	10.04	16.81	14.27	13.41	11.57	9.19	18.46	12.35	15.63	28.98
mml-miR-324-3p	-0.32905	7.3015	0.392298	0.937178	127.15	152.78	58.29	81.35	188.01	181.32	126.78	98.53	113.93	185.21	181.85	184.39
mml-miR-363-3p	0.203892	4.78283	0.39358	0.937178	25.42	22.52	16.86	19.51	35.61	24.87	30.23	20.4	12.61	22.12	28.21	29.25
mml-miR-6790-3p	-0.202482	4.04694	0.400562	0.937178	13.92	15.19	5.95	7.27	21.34	18.27	16.75	10.54	11.03	22.44	17.99	13.95
mml-let-7i-3p	-0.201715	4.58075	0.406628	0.937178	18.85	22.21	18.62	14.28	21.34	24.11	15.89	31.83	16.54	23.51	19.83	19.35
mml-miR-1249	-0.348104	6.79557	0.410644	0.937178	110.64	90.6	17.25	24.92	418.7	60.44	31.87	32.62	26.31	229.02	106.56	58.49
mml-miR-148b-3p	0.141569	9.49259	0.414428	0.937178	679.7	602.21	470.31	537.28	554.95	1250.56	585.38	461.82	499.57	634.45	892.82	522.4
mml-miR-1255b	0.271448	2.87924	0.414479	0.937178	6.81	5.62	8.29	5.83	3.32	8.65	7.95	4.93	6.35	6.66	6.46	3.69
mml-miR-106b-5p	-0.360388	6.66895	0.414877	0.937178	84.2	86.53	145.72	182.47	27.54	26.81	38.43	92.14	152.6	91.69	41.84	54.35
mml-miR-1255a-5p	0.364073	0.652672	0.417365	0.937178	1.29	1.06	1.56	1.69	0.66	1.41	1.12	0.22	1.59	1.61	0.87	0.99
mml-miR-18b	-0.219132	4.80746	0.419151	0.937178	22.54	25.25	29.73	41.9	13.6	10.7	16.75	25.67	38.51	28.78	21.14	12.15
mml-miR-211	-0.248236	2.59594	0.419448	0.937178	4.95	5.19	3.51	1.27	5.42	2.49	12.09	4.26	2	7.84	4.19	7.65
mml-miR-30e-3p	0.264558	8.32061	0.423445	0.937178	313.59	248.58	191.54	180.78	301.69	361.68	532.26	269.47	207.14	330.38	252.51	183.4
mml-miR-1306-3p	-0.360259	0.690023	0.424456	0.937178	1.06	1.35	1.46	1.77	0.77	0.76	0.52	1.12	0.92	1.07	1.48	2.16
mml-miR-3200-5p	0.261242	2.07016	0.427197	0.937178	3.77	3.21	2.14	4.14	5.09	3.24	4.23	1.79	3.42	2.15	4.28	4.41
mml-miR-450b-5p	0.299559	1.08044	0.429938	0.937178	1.91	1.45	0.68	3.72	2.43	1.95	0.78	1.35	1.59	1.4	2.1	0.81
mml-miR-542-5p	-0.233051	2.07319	0.430828	0.937178	3.15	3.82	4	3.97	3.1	3.14	1.55	4.15	4.84	4.4	4.11	1.62
mml-miR-330-3p	0.251227	1.62617	0.432161	0.937178	2.8	2.32	1.07	1.94	3.21	4.87	2.94	1.57	1.25	2.58	3.32	2.88
mml-miR-937	-0.301526	0.85887	0.432877	0.937178	1.21	1.58	0.39	1.35	1.77	0.97	1.55	0.22	1.09	2.15	1.48	2.97
mml-miR-758-3p	0.280211	1.10701	0.433925	0.937178	1.93	1.54	0.78	0.93	3.87	1.84	2.25	0.67	1.17	2.25	2.45	1.17
mml-miR-145-5p	0.256005	1.80221	0.434258	0.937178	3.03	2.76	2.73	2.62	3.54	3.57	2.68	2.24	3.01	4.83	2.53	1.17
mml-miR-135a-5p	0.30523	1.29662	0.436926	0.937178	2.15	1.75	2.34	2.62	3.65	1.3	0.86	3.25	1.5	1.61	0.7	1.71
mml-miR-6529-3p	-0.188316	4.57431	0.438005	0.937178	19.32	22.41	11.79	10.98	22.34	24.87	26.6	15.92	13.03	37.69	21.92	23.49
mml-miR-543-5p	0.290339	1.04681	0.438079	0.937178	1.85	1.44	0.88	1.69	2.54	2.92	1.21	1.35	1.5	1.5	1.31	1.53
mml-miR-17-5p	-0.248411	8.6226	0.440459	0.937178	323.9	338.37	607.75	551.22	111.7	172.46	176.36	380.22	556.62	347.02	223.86	184.12
mml-miR-382-5p	-0.25808	6.0353	0.441925	0.937178	53	58.8	89.19	79.66	18.58	48.66	28.93	64.57	88.62	40.59	69.09	31.14
mml-miR-942-5p	0.122265	10.9525	0.443889	0.937178	1782.22	1662.69	1299.53	1481.48	2428.69	1522.6	2178.8	1432.32	1211.87	2026.83	1405.09	2237.36
mml-miR-449a-5p	-0.349	1.54896	0.444029	0.937178	2.16	2.4	1.95	6.93	0.44	0	1.47	0.9	7.68	1.72	0.61	1.08
mml-miR-369-3p	-0.302336	0.83799	0.444699	0.937178	1.25	1.45	1.36	3.21	0.33	0.76	0.6	1.91	2.26	1.07	1.57	0.45
mml-miR-15a-5p	-0.21144	11.4903	0.445381	0.937178	2486.18	2327.88	4456.04	5162.58	653.48	909.11	1249.69	2958.91	4169.19	1903.78	1331.46	1276.07
mml-miR-200c-3p	-0.194834	3.64292	0.447947	0.937178	10.14	11	9.16	21.71	3.21	7.57	9.07	9.19	21.3	6.76	7.95	9.81
mml-miR-141-3p	-0.362701	0.522869	0.449674	0.937178	1	1.09	0.49	3.04	0.22	0.76	0.52	0.45	1.25	0.75	2.01	0.99
mml-miR-30a-3p	0.188585	4.81734	0.454052	0.937178	27.45	22.03	13.74	20.95	12.94	37.63	51.99	14.68	26.14	14.92	28.56	25.83
mml-miR-1284	0.270594	1.47964	0.454172	0.937178	2.57	2.01	0.68	1.27	4.76	2.59	3.54	1.35	0.84	1.93	2.88	3.06
mml-miR-370-3p	-0.18904	5.19035	0.459417	0.937178	29.66	32.91	43.96	27.03	14.49	43.14	19.69	38.9	41.76	23.62	39.92	20.34
mml-miR-20a-5p	-0.312095	7.28583	0.460282	0.937178	133.75	128.08	211.13	313.5	39.92	28.98	75.22	164.66	239.55	92.34	66.91	76.94
mml-miR-7204-3p	0.215473	5.94681	0.463471	0.937178	56.97	50.18	57.9	38.52	73.1	51.58	63.74	40.02	33.66	58.41	64.55	54.26
mml-miR-26b-5p	0.21774	11.4538	0.463495	0.937178	2699.04	1959.57	5414.8	4403.47	680.69	1156.6	1839.65	2173.59	3615.91	1616.46	1278.36	1113.55
mml-miR-30b-3p	-0.27806	0.578789	0.466262	0.937619	0.99	1.26	0.88	1.01	0.66	1.62	0.78	0.56	0.92	1.4	2.27	1.17
mml-miR-487b-5p	-0.213013	1.76593	0.470202	0.940404	2.57	3.04	1.85	1.77	2.54	3.14	3.54	2.47	1.75	3.44	3.84	3.69
mml-miR-181b-5p	-0.25226	5.75514	0.473726	0.941096	43.49	49.92	49.22	82.96	31.08	37.09	17.1	35.42	75.92	27.16	61.49	49.59
mml-miR-499-5p	-0.231105	1.81549	0.477992	0.941096	2.66	2.99	4.29	3.63	0.66	2.92	1.81	4.04	4.09	1.61	2.71	2.52
mml-miR-190b	-0.22391	5.24057	0.47822	0.941096	30.98	29.61	92.5	24.67	8.29	11.46	17.96	65.8	23.8	27.49	17.38	13.59
mml-miR-484	-0.319074	13.3621	0.482792	0.94504	8758.05	9937.13	2998.22	6834.39	18487.4	6001.65	9468.57	5482.45	6613.65	9451.8	13285.7	14852
mml-miR-224-5p	0.977713	1.35152	0.48589	0.946072	2.17	1.95	0.29	8.28	1.99	0.22	0.09	0	0.92	0	7.77	1.08
mml-miR-93-3p	-0.121907	10.3681	0.491358	0.947656	1187.81	1158.53	501.9	693.9	2432.56	922.41	1388.31	814.69	836.51	1482.03	1415.4	1244.04
mml-miR-106a-5p	-0.27264	6.30666	0.501331	0.947656	64.57	67.77	127.5	110.83	19.8	28.87	35.84	75.66	118.36	71.08	40.27	33.48
mml-let-7c-5p	-0.287906	7.35	0.501524	0.947656	133.4	145.99	199.34	203.84	38.82	129.32	95.69	133.95	204.05	120.25	153.72	117.98
mml-miR-301a-5p	0.23605	0.688351	0.506732	0.947656	1.35	1.14	0.68	0.84	2.43	1.3	1.47	0.67	0.58	1.72	1.48	1.26
mml-miR-29b-2-5p	-0.16801	4.50595	0.506855	0.947656	18.21	20.26	25.93	24.08	10.4	14.6	16.06	19.39	30.32	17.82	16.42	17.37
mml-miR-128b-3p	0.155316	11.6472	0.506864	0.947656	3059.99	2616.91	1623.63	1363.3	4119.63	4177.27	4016.12	2340.83	1496.78	3929.86	2794.99	2522.09
mml-miR-29a-3p	0.236607	7.92037	0.507141	0.947656	238.02	189.3	173.11	248.53	145.43	452.28	170.74	159.84	240.22	183.39	209.97	153.07
mml-miR-652	-0.234925	8.10235	0.510442	0.947656	221.34	253.54	235.01	352.86	238.43	153.54	126.87	212.53	290	197.02	271.81	296.34
mml-miR-671-3p	-0.239833	7.53997	0.511764	0.947656	151.39	177.47	76.42	107.54	222.84	174.4	175.75	108.06	127.46	204.97	208.49	238.39
mml-miR-342-5p	0.1836	2.5797	0.515278	0.947656	5.56	4.79	2.14	5.66	3.87	11.14	5.01	2.35	4.43	4.19	8.73	4.23
mml-miR-6505-3p	0.194049	1.65279	0.516321	0.947656	2.76	2.4	1.66	1.94	3.32	2.81	4.06	2.13	1.59	2.79	2.79	2.7
mml-miR-30c-5p	0.26664	13.3319	0.519212	0.947656	10126.1	8094.81	5663.36	5405.03	12098	13187.9	14276.1	7679.01	5319.5	11161.8	8886.23	7427.5
mml-miR-382-3p	0.203533	1.40258	0.521625	0.947656	2.3	2.04	1.27	1.61	2.21	3.89	2.5	1.79	1.25	2.04	3.58	1.53
mml-miR-138-5p	-0.198323	3.23431	0.523242	0.947656	7.47	8.45	9.55	13.77	4.64	4.65	4.75	5.49	13.95	5.8	11.09	5.94
mml-miR-301a-3p	-0.211515	4.04728	0.5275	0.947656	13.24	14.58	21.74	22.47	3.98	7.14	10.88	16.48	24.47	14.17	12.49	5.31
mml-miR-636	-0.160513	4.12181	0.528635	0.947656	14.55	15.64	8.38	9.29	26.65	12	16.41	10.87	11.19	16.43	17.03	22.68
mml-miR-20a-3p	-0.251841	2.68898	0.530481	0.947656	4.96	5.88	3.61	9.8	4.42	1.62	5.35	8.86	7.85	3.44	6.81	2.43
mml-miR-210-5p	-0.213924	1.24075	0.535412	0.948477	1.8	2.01	0.97	1.35	3.54	1.51	1.64	1.46	2	2.25	2.71	1.62
mml-miR-543-3p	0.180279	3.09248	0.536096	0.948477	7.8	7.02	4.58	8.36	10.51	10.27	5.27	4.71	5.18	6.33	12.05	6.84
mml-miR-155	0.177529	8.36746	0.541599	0.953629	307.41	257.33	375.76	409.63	108.71	255.17	387.78	275.19	324.83	156.76	255.65	274.2
mml-miR-26a-1-3p	0.205364	2.39686	0.547246	0.956373	4.87	4	2.44	2.37	5.97	4.87	8.72	4.82	2.84	5.48	2.71	4.14
mml-miR-210-3p	-0.129494	9.30732	0.548355	0.956373	515.87	563.1	853.29	678.86	322.93	439.2	285.09	630.97	820.14	628.97	477.33	258.09
mml-miR-491-3p	-0.186022	3.43049	0.553108	0.958022	8.81	10.05	4.29	4.31	9.07	12.76	13.65	10.2	4.59	16.64	12.32	6.48
mml-miR-154-5p	0.150771	5.43833	0.557047	0.958022	41.6	35.38	15.99	23.23	64.7	53.31	50.78	22.64	25.22	55.4	38.61	35.01
mml-miR-450a-2-3p	-0.241852	0.458827	0.557111	0.958022	0.91	1.14	1.07	0.84	1.22	1.08	0.35	1.12	1.59	1.93	0.61	0.45
mml-miR-502-3p	0.135283	4.7387	0.570202	0.96517	24.81	22.39	13.84	25.85	37.05	29.95	17.36	14.91	20.05	24.16	32.93	19.89
mml-miR-93-5p	-0.406784	15.5359	0.576875	0.96517	36342.6	43394	71921.3	51355.7	10808.4	21651.6	25975.8	49775.4	72264	41911.1	28332.5	24687.1
mml-miR-423-3p	-0.189982	12.4052	0.577308	0.96517	4557.12	5023.38	2010.02	3832.23	8936.55	4128.5	3878.28	2773.06	3669.04	4708.4	6039.1	7927.31
mml-miR-149-5p	-0.248538	2.45851	0.581681	0.96517	3.02	5.65	5.36	1.18	0.88	1.3	6.39	3.36	0.5	1.5	1.75	21.15
mml-miR-30a-5p	0.225185	7.0788	0.583094	0.96517	145.56	96.9	24.08	73.75	64.03	230.85	335.09	42.6	81.52	55.4	142.63	162.34
mml-miR-181d	-0.221679	0.967365	0.583347	0.96517	1.43	1.55	1.27	3.97	0.55	0.76	0.6	0.9	2.92	0.75	2.36	0.81
mml-miR-128a-3p	0.138427	11.8534	0.584034	0.96517	3516.89	3043.36	1877.26	1603.38	4632.67	5024.31	4446.82	2665.78	1801.4	4483.24	3425.52	2840.84
mml-miR-133d-3p	-0.205434	4.24594	0.593848	0.96517	16.1	16.46	9.65	6.76	41.36	9.51	13.21	14.35	25.81	16.96	6.64	18.54
mml-miR-15a-3p	-0.208106	2.04898	0.59456	0.96517	3.26	3.71	1.27	2.53	5.97	2.81	3.71	5.38	3.34	4.19	3.93	1.71
mml-miR-21-3p	-0.185772	0.974116	0.595842	0.96517	1.41	1.68	1.36	1.61	1.99	0.97	1.12	1.46	1.42	2.25	2.36	0.9
mml-miR-221-5p	0.143135	3.28272	0.598555	0.96517	8.68	7.97	5.75	14.11	8.4	6.49	8.64	6.84	11.78	4.62	9.87	6.75
mml-miR-32-5p	-0.158713	4.07785	0.599268	0.96517	13.37	15.06	16.08	21.88	6.64	5.84	16.41	29.93	13.45	8.27	14.76	8.91
mml-miR-6505-5p	0.20028	0.415187	0.608524	0.96517	1.05	0.95	0.78	0.59	1.66	1.19	1.04	1.01	0.58	1.5	1.22	0.45
mml-miR-1304	0.145282	5.70216	0.6088	0.96517	47.3	39.76	75.35	68.68	14.05	24.87	53.55	52.24	63.48	19.97	28.04	35.1
mml-miR-377-3p	0.188278	1.77334	0.608915	0.96517	3.09	2.62	0.88	3.63	4.64	3.35	2.94	2.58	1.67	2.47	3.93	2.43
mml-miR-138-3p	-0.138855	3.165	0.611894	0.96517	7.5	8.06	5.95	3.8	6.64	14.27	6.82	8.74	5.6	6.98	12.84	6.12
mml-miR-26b-3p	0.145746	5.80557	0.616962	0.96517	49.7	47.67	36.65	33.79	59.06	59.25	59.76	32.06	27.23	71.29	40.27	67.49
mml-miR-188-5p	0.160195	1.34815	0.617397	0.96517	2.2	1.98	0.78	1.61	4.09	2.38	2.16	1.12	1.17	3.54	2.45	1.62
mml-miR-185-5p	0.114349	11.84	0.623077	0.96517	3290.45	3109.83	2950.94	3550.42	3003.99	3442.56	3504.32	2389.48	3549.18	3059.19	3429.98	3121.34
mml-let-7d	-0.140893	11.7926	0.626678	0.96517	3027.65	3000.48	4492.11	5272.23	1197.59	2111.66	2064.63	2662.42	4133.27	2319.84	2552.17	3334.71
mml-miR-151-5p	0.16681	6.36812	0.627521	0.96517	76.52	68.41	57.61	55.92	82.28	94.82	91.98	53.13	62.98	79.78	79.83	66.32
mml-miR-660-3p	0.144709	1.82444	0.629353	0.96517	3.15	2.77	1.36	2.28	5.86	2.59	3.63	1.68	1.92	4.29	3.06	2.88
mml-miR-130b-3p	0.128193	5.22554	0.630132	0.96517	32.72	29.47	63.26	35.31	14.6	24.76	25.65	43.27	44.77	22.23	20.18	16.92
mml-miR-204-5p	0.119217	3.24572	0.63518	0.96517	8.29	7.6	7.51	5.24	6.08	6.05	16.58	9.19	4.26	5.58	6.11	12.87
mml-miR-15b-3p	-0.116638	11.1259	0.637533	0.96517	2042.69	1937.45	704.16	723.13	3158.26	2607.85	3020.08	1948.39	1039.64	2720.76	2294.42	1684
mml-miR-20b-5p	-0.135352	4.89917	0.642071	0.96517	24.46	25.97	40.74	30.5	11.06	16.87	23.15	28.36	35.5	28.35	22.45	15.21
mml-miR-191-3p	-0.156172	6.33479	0.643118	0.96517	67.38	76.12	40.26	46.29	81.73	94.72	73.93	42.48	64.4	103.4	99.31	71
mml-miR-7194-3p	-0.15417	2.09835	0.644193	0.96517	3.59	3.72	1.17	1.61	3.87	6.92	4.4	1.79	3.01	5.48	5.15	3.15
mml-miR-26a-2-3p	0.140178	3.53857	0.644738	0.96517	10.64	9.29	6.14	5.49	8.63	11.35	21.59	13.9	4.34	10.09	8.73	9.36
mml-miR-196b-5p	-0.138427	4.16045	0.647694	0.96517	15.12	14.92	20.18	31.09	2.76	8.11	13.47	14.24	31.07	9.66	8.91	10.71
mml-miR-335-3p	-0.127922	3.93161	0.649054	0.96517	13	13.66	4.48	12.84	16.81	11.35	19.52	11.88	7.77	14.71	17.73	16.2
mml-miR-103-3p	-0.163429	12.9183	0.653787	0.96517	6400.21	6962.76	8159.88	11105.5	3102.97	5153.41	4479.29	5957.49	11653.3	4841	7418.95	4943.03
mml-miR-7194-5p	0.170959	0.622692	0.655808	0.96517	1.27	1.1	0.29	0.76	1.44	2.49	1.38	0.9	0.67	0.86	2.1	0.99
mml-miR-3122	-0.106482	3.89953	0.657971	0.96517	12.14	13.49	11.79	11.66	14.6	12.22	10.45	11.43	18.96	14.07	12.75	10.26
mml-miR-1262-3p	0.177141	3.90494	0.658013	0.96517	13.16	11.26	29.44	5.91	2.21	13.41	14.85	9.86	3.01	6.01	10.31	27.09
mml-miR-205	-0.208117	1.65549	0.658764	0.96517	2.39	2.83	0.68	3.21	1.66	5.19	1.21	0.67	1.17	3.01	4.45	4.86
mml-miR-376c-3p	0.138164	3.22887	0.667834	0.96517	8.79	7.67	3.12	9.71	13.82	12.11	5.18	7.4	7.1	6.44	13.1	4.32
mml-miR-122a-5p	0.394967	7.11434	0.670936	0.96517	160.33	57.12	576.66	140.49	52.97	21.52	10.02	13.9	75.92	20.83	142.81	32.13
mml-miR-148a-5p	0.153476	3.00751	0.671118	0.96517	7.24	6.53	2.14	7.6	11.83	5.19	9.41	3.03	4.51	3.97	8.56	12.6
mml-let-7g-3p	-0.138331	1.7541	0.677032	0.96517	2.67	2.94	1.46	1.86	4.09	3.35	2.59	3.7	2.67	3.65	2.97	1.71
mml-miR-362-3p	0.171186	0.275806	0.677665	0.96517	0.94	0.85	0.49	0.59	1.55	1.3	0.78	0.9	0.33	1.07	1.22	0.72
mml-miR-375	0.154848	1.59649	0.679264	0.96517	2.52	2.33	2.14	5.49	1.66	2.38	0.95	0.9	4.76	0.97	3.23	1.8
mml-miR-654-3p	0.149166	7.84237	0.680179	0.96517	225.54	186.62	69.99	133.47	324.92	311.4	287.94	134.74	131.39	256.19	255.48	155.32
mml-miR-4766-5p	0.133817	2.363	0.680212	0.96517	4.43	4.05	7.41	4.05	2.54	3.89	4.23	4.82	4.76	4.08	4.54	2.07
mml-miR-181a-3p	-0.0962392	3.79804	0.680635	0.96517	11.96	12.68	5.46	8.36	13.16	21.52	11.31	8.41	9.02	11.06	23.15	11.79
mml-miR-329-3p	0.124745	2.84963	0.684776	0.96517	6.29	6.19	3.8	5.24	8.52	8.43	5.44	6.73	2.26	7.84	9.43	4.68
mml-miR-27a-3p	0.140292	6.35072	0.685293	0.96517	76.66	67.92	41.13	66.82	81.95	117.31	76.09	57.28	58.89	82.57	81.67	59.21
mml-miR-1235	0.155138	2.47986	0.689042	0.96517	5.09	4.6	2.92	1.1	6.3	12.54	2.59	1.79	0.67	7.62	6.99	5.94
mml-miR-323b-3p	-0.127962	6.16923	0.691497	0.96517	60.94	66.28	41.91	30.33	63.37	90.5	78.59	72.3	38.34	61.42	104.55	54.8
mml-miR-409-5p	0.0998779	3.66095	0.695059	0.96517	11.59	10.73	5.75	9.04	16.59	17.95	8.64	9.19	8.69	9.99	18.69	7.11
mml-miR-4677-3p	0.132529	1.72296	0.698112	0.96517	2.97	2.54	1.56	0.76	3.65	4.54	4.32	2.35	1.25	3.97	2.88	2.25
mml-miR-27a-5p	-0.15511	0.82072	0.700636	0.96517	1.34	1.33	1.46	3.13	1	0.86	0.26	1.12	2	1.4	1.05	1.08
mml-miR-339-3p	-0.0804625	9.30414	0.700828	0.96517	556.35	562.33	374.69	333.6	939.58	792.12	341.74	652.49	384.13	595.05	798.06	381.92
mml-miR-502-5p	0.140971	1.33282	0.702895	0.96517	2.23	1.83	0.78	2.37	4.53	1.41	2.07	1.35	2.09	1.72	1.83	2.16
mml-miR-187-5p	-0.0923157	5.45213	0.708707	0.965959	37.36	39.8	39.28	7.52	44.9	73.52	21.59	50.33	8.77	52.29	66.82	20.79
mml-miR-125b-5p	0.0852963	9.10557	0.710676	0.965959	515	470.99	388.05	244.39	258.89	1074.65	609.04	493.99	335.02	283.89	953.53	288.51
mml-miR-339-5p	-0.176888	13.9968	0.716646	0.965959	13460.2	15465.9	10058.7	7608.79	18095.8	19873	11664.7	15975.5	8813.55	22551.8	19655.9	10332.4
mml-miR-107-3p	-0.104344	8.28209	0.718858	0.965959	259.3	281.94	297.78	414.62	159.58	257.66	166.86	252.32	440.18	190.37	346.84	179.98
mml-miR-95-3p	-0.175099	1.12819	0.721264	0.965959	1.56	1.76	1.95	4.65	0.33	0.86	0	0.78	6.01	1.18	0.44	0.36
mml-miR-605	-0.164015	0.576799	0.722923	0.965959	0.97	1.25	0.97	1.18	1	0.76	0.95	0.22	0.67	1.29	2.27	1.8
mml-miR-6827-5p	-0.143051	0.518467	0.731013	0.965959	1.01	1.1	1.46	1.18	0.55	1.41	0.43	0.67	1.84	0.86	1.22	0.9
mml-miR-18a-3p	-0.0971363	9.13286	0.732088	0.965959	490.4	498.04	186.47	401.01	1071.41	315.61	477.51	255.46	286.16	490.04	556.9	901.62
mml-miR-671-5p	0.0939067	4.58604	0.733258	0.965959	22.58	19.97	7.99	21.37	37.49	20.76	25.3	14.46	19.29	18.68	30.22	17.19
mml-miR-486-5p	-0.290043	17.0234	0.73457	0.965959	106090	127363	63454.7	65112.6	178226	98783.9	124872	101695	75838.7	162096	126357	170829
mml-miR-668	-0.137789	0.297643	0.73554	0.965959	0.86	0.93	0.29	1.1	1.22	1.08	0.6	0.56	0.92	0.97	1.31	0.9
mml-miR-454-3p	-0.101586	9.12308	0.736264	0.965959	483.38	451.9	852.8	783.53	114.68	208.68	457.21	571.56	764.43	377.62	300.29	245.59
mml-miR-92b-3p	-0.129767	7.40999	0.737593	0.965959	139.16	157.2	32.65	94.78	183.25	93.96	291.13	55.37	67.91	144.95	123.07	394.7
mml-miR-369-5p	0.0744146	3.8984	0.755967	0.980628	13.26	12.5	10.82	16.73	7.74	17.3	13.73	11.99	14.12	11.81	14.67	9.9
mml-miR-532-5p	0.118677	7.19416	0.757649	0.980628	131.72	124.04	138.8	96.05	122.65	195.81	105.28	135.97	125.37	132.92	157.74	68.21
mml-miR-500b-3p	0.147835	0.593239	0.758187	0.980628	1.25	1.07	0.49	0.84	1.66	2.49	0.78	0.9	0.84	1.93	0.44	1.26
mml-miR-140-3p	0.116255	13.1317	0.768071	0.980628	8467.59	7403.84	4565.9	4325.33	11307	12019.1	10120.7	7762.86	4920.84	8998.27	8643.5	6693.72
mml-miR-372-3p	0.109389	1.76496	0.778914	0.980628	2.85	2.6	8.38	1.35	1.22	3.03	0.26	6.61	0.42	1.29	3.76	0.9
mml-miR-340-3p	0.108883	6.59891	0.780861	0.980628	87.21	82.78	67.16	56.77	70.89	127.05	114.17	94.83	43.02	113.81	96.08	66.14
mml-miR-1255a-3p	-0.09193	3.14307	0.785461	0.980628	7.76	7.44	3.41	3.55	6.86	10.81	14.16	8.97	5.1	8.7	7.25	7.2
mml-miR-196a-5p	-0.111518	7.72224	0.789608	0.980628	186.89	173.73	276.83	348.89	35.17	143.91	129.63	157.94	313.22	113.28	171.72	112.49
mml-let-7a-5p	-0.179022	15.1511	0.791278	0.980628	30631.6	30545.4	54903.8	46165.4	8112.31	20676.2	23300	33958.4	47993	26381.2	21462.4	22932.1
mml-miR-96	-0.100715	1.19618	0.791487	0.980628	1.84	1.77	0.39	4.56	1.44	1.84	0.95	0.67	2.92	1.07	2.18	1.98
mml-miR-134-5p	-0.0635003	5.1323	0.792884	0.980628	29.33	30.76	40.26	29.57	20.68	34.71	21.42	33.07	38.76	27.27	33.28	21.42
mml-miR-7	-0.0756424	11.2498	0.794005	0.980628	2128.39	2032.67	3286.25	3101.42	410.07	1973.05	1871.17	2588.66	2758.02	1470.01	2369.54	977.12
mml-miR-500a-3p	-0.0580992	4.74203	0.798385	0.980628	23.05	23.97	16.28	22.98	22.12	35.57	18.31	18.38	25.89	26.09	30.4	19.08
mml-miR-486-3p	0.113532	1.37738	0.806412	0.980628	2.19	2.05	1.36	2.37	4.64	1.19	1.38	1.57	1.34	1.29	4.54	1.53
mml-miR-424-5p	-0.0869546	6.42291	0.810513	0.980628	71.45	75.21	100.69	122.24	50.43	70.61	13.3	117.36	98.89	78.49	67.17	14.13
mml-miR-376b-5p	0.0844752	1.0091	0.812871	0.980628	1.65	1.57	0.88	0.76	2.54	2.27	1.81	1.35	1.09	2.79	1.75	0.9
mml-miR-551a	0.0854092	1.21439	0.815793	0.980628	2.01	1.78	0.29	0.93	0.77	5.73	2.33	0.34	1.09	0.75	4.45	2.25
mml-miR-186-3p	0.125502	0.374878	0.819752	0.980628	0.97	0.93	0.68	0.59	1.33	0.54	1.73	1.23	0.92	0.86	1.57	0.09
mml-miR-7172-3p	0.0860802	0.803559	0.825276	0.980628	1.47	1.25	0.58	0.34	1.44	3.03	1.99	0.9	0.84	1.07	1.83	1.62
mml-miR-1262-5p	0.0768967	1.62055	0.82674	0.980628	2.45	2.48	2.34	1.1	1	2.38	5.44	3.25	0.25	1.61	2.62	4.68
mml-miR-15b-5p	0.105085	13.817	0.835239	0.980628	13319.8	10966.1	24278.5	18175.1	5014.65	12666.1	6464.81	12079.5	16040.3	8625.48	9791.37	8293.94
mml-miR-331-3p	-0.0410212	11.3586	0.836022	0.980628	2265.59	2337.16	1423.03	1188.68	2869.51	2713.27	3133.48	1820.16	1332.82	3542.57	2005.06	2985.18
mml-miR-125a-5p	-0.0511539	8.67953	0.839181	0.980628	368.41	362.2	256.26	169.38	221.62	739.89	454.88	365.65	204.47	265.96	648.7	326.22
mml-miR-199a-5p	0.055121	3.78852	0.84265	0.980628	13.14	11.02	3.9	3.89	11.72	18.92	27.29	7.51	4.09	14.82	12.4	16.29
mml-miR-491-5p	-0.0778854	7.42603	0.847281	0.980628	156.49	150.63	61.9	117.34	318.06	158.19	126.96	95.17	126.63	147.1	225.35	158.92
mml-miR-25	0.137749	16.1305	0.854454	0.980628	64286.9	59421.8	71835.7	48305.2	66328.2	67786.6	67178.7	62291.2	63792.9	69975.2	50913.8	50136.1
mml-miR-98	0.0808263	6.73177	0.855958	0.980628	101.38	78.02	150.01	208.49	23.89	40.11	84.38	82.28	129.8	64.42	55.29	58.31
mml-miR-22	0.0322149	10.561	0.863645	0.980628	1344.21	1301.41	852.22	2058.12	1845.55	1041.13	924.01	833.97	1950.41	1115.36	1169	1438.33
mml-let-7a-3p	-0.0738919	6.41276	0.864279	0.980628	81.92	71.46	19.4	18.92	97.43	124.45	149.41	60.19	24.31	115.53	102.02	55.25
mml-miR-30d-5p	0.0641551	13.0038	0.864594	0.980628	7617.75	6933	3528.87	4747.97	9802.03	10571.6	9438.25	6499.8	4566.85	7959.14	8168.88	7470.34
mml-miR-425	0.0907512	14.1462	0.864773	0.980628	16974.9	14983.3	8262.03	13550.1	30847.4	12801.7	19413.3	12433.1	10736.4	13852.8	18555.7	19338.6
mml-miR-598-3p	-0.0585641	1.77456	0.868153	0.980628	2.67	2.97	3.31	2.2	1.66	3.24	2.94	2.69	1.92	4.62	3.93	1.71
mml-miR-148a-3p	0.0317041	9.82659	0.871356	0.980628	808.6	807.4	568.47	630.79	513.92	1071.83	1257.98	831.17	672.38	557.68	1456.89	518.89
mml-miR-140-5p	-0.0605578	6.47111	0.873064	0.980628	72.75	80.34	75.84	96.64	55.85	61.31	74.1	93.93	108	96.74	62.36	40.68
mml-miR-505-3p	-0.0553276	6.02707	0.877723	0.980628	54.48	59.37	57.12	39.37	53.86	83.04	39.04	33.96	35.16	80.1	72.15	75.5
mml-miR-191-5p	0.117503	16.4709	0.882196	0.980628	83484.1	75673.3	62841.4	50827.3	82197.9	122060	99493.9	88080.2	58985.8	66859.3	92406.5	72034.5
mml-miR-19a-3p	0.0609069	7.51765	0.883033	0.980628	159.09	159.7	156.54	171.15	100.97	145.1	221.7	221.38	161.87	139.9	205.78	69.56
mml-miR-411-5p	0.0486078	1.25455	0.883274	0.980628	1.88	1.86	2.34	3.29	1	1.3	1.47	2.58	2.84	1.5	1.57	0.81
mml-miR-487b-3p	0.0359152	3.63034	0.883416	0.980628	10.65	10.93	7.6	10.48	10.4	14.16	10.62	11.88	8.77	9.45	17.73	6.84
mml-miR-590-3p	0.0612987	2.74783	0.884279	0.980628	6.04	4.86	11.5	11.07	0.77	1.95	4.92	7.73	7.85	3.87	2.97	1.89
mml-miR-503-3p	-0.0391633	5.7603	0.886243	0.980628	45.94	48.01	53.32	52.04	52.64	52.33	19.35	50.44	63.23	54.76	50.75	20.88
mml-miR-378a	-0.0551319	7.23564	0.889751	0.980628	130.02	133.53	95.33	260.02	108.38	82.28	104.07	107.16	211.99	70.54	158.62	119.33
mml-miR-542-3p	0.049326	1.71055	0.890046	0.980628	2.73	2.55	4.19	5.15	1	2.38	0.95	3.81	2.76	2.25	3.23	0.72
mml-miR-130a-3p	0.0348339	3.99117	0.891638	0.980628	13.66	12.65	27.49	18.33	5.64	8.11	8.72	17.26	20.88	7.95	10.31	6.84
mml-miR-126	-0.0372552	10.479	0.891873	0.980628	1315.61	1032.66	3002.7	2149.95	193.87	510.56	720.97	1605.28	1648.46	600.41	870.55	438.62
mml-miR-330-5p	-0.0357144	3.02023	0.89549	0.980628	6.94	7.01	3.22	3.97	9.84	7.46	10.19	5.16	4.01	10.84	6.2	8.82
mml-miR-451	0.0877016	15.3109	0.896726	0.980628	37166.1	34543.4	16874.2	44390.8	45887.9	39965.7	38711.6	33808	23301.3	29121	42741.8	43745.3
mml-miR-660-5p	0.035044	5.69798	0.896815	0.980628	45.02	45.55	39.87	50.86	37.71	51.68	45	51.34	45.35	48.21	55.2	27.63
mml-miR-7186-5p	0.0387378	5.82798	0.897272	0.980628	50.75	47.26	57.41	83.72	38.82	50.39	23.4	48.31	60.39	37.36	53.8	36.45
mml-miR-6529-5p	0.0390059	8.03416	0.903549	0.980628	239.09	227.17	116.19	138.12	339.29	302.1	299.77	159.17	142.75	221.08	337.32	275.55
mml-miR-7180-5p	-0.0503654	6.46571	0.904245	0.980628	82.2	74.44	19.79	54.4	192.32	53.2	91.29	30.6	45.27	74.3	91.71	130.31
mml-miR-7172-5p	-0.0377359	1.96787	0.904724	0.980628	3.32	3.23	1.17	1.69	6.52	2.81	4.4	1.57	1.84	4.19	3.49	5.04
mml-miR-181c-3p	-0.0375702	1.82805	0.904859	0.980628	3.02	2.95	0.58	3.97	3.65	4.54	2.33	1.46	3.17	3.76	4.11	2.25
mml-miR-215-5p	0.0457093	0.494573	0.906438	0.980628	1.06	1.04	0.1	1.35	1.11	1.3	1.47	0.22	0.84	1.29	1.66	1.17
mml-miR-3200-3p	-0.0420135	7.50854	0.908539	0.980628	157.59	163.78	90.55	103.48	213.11	195.81	184.99	95.95	120.61	236.21	167.18	198.97
mml-miR-99b-5p	-0.0342816	5.90369	0.909049	0.980628	55.74	51.29	32.95	21.71	30.41	125.86	67.8	46.97	30.32	35.11	96.34	47.7
mml-miR-92a-3p	-0.0890355	16.7522	0.915001	0.980628	92287.9	100123	64742.9	91127.4	127071	82192.4	96306.1	84759.9	79854.4	82015.3	108830	145157
mml-miR-199a-3p	0.048555	5.57126	0.916975	0.980628	43.79	38.82	58.78	100.78	16.92	16.76	25.74	19.84	39.84	19.43	80.36	34.65
mml-miR-409-3p	-0.0195438	9.71596	0.918428	0.980628	753.37	740.56	487.96	408.19	705.46	1271.54	893.7	784.54	567.47	792.39	1064.98	493.42
mml-miR-1271-5p	0.0395149	6.85888	0.918677	0.980628	109.5	95.76	45.23	131.02	247.61	60.66	62.96	65.46	131.14	155.04	71.27	55.88
mml-let-7f-5p	0.048827	13.3447	0.921995	0.980628	9666.12	7682.92	17644.9	16456	1536.11	4106.55	8586.96	9660.92	13379.4	6121.82	4547.45	4705
mml-miR-378d	0.0265587	4.59062	0.922873	0.980628	20.71	20.53	22.32	35.9	18.36	12.11	14.85	23.32	28.9	9.66	24.37	16.38
mml-miR-550-5p	-0.0333306	0.765296	0.92397	0.980628	1.27	1.33	1.17	1.52	1.11	1.51	1.04	1.01	1.17	1.18	1.83	1.44
mml-miR-7189-3p	0.0373171	1.26102	0.924442	0.980628	1.92	1.83	2.24	1.94	0.44	2.7	2.25	1.23	1.75	1.29	1.66	3.24
mml-miR-34a-5p	-0.0472633	7.06943	0.925716	0.980628	124.87	96.36	286.18	197.25	34.5	57.95	48.45	72.08	168.64	64.74	72.32	104.03
mml-miR-1296-5p	-0.0369891	7.02427	0.926303	0.980628	113	119	36.07	84.31	198.07	140.24	106.31	33.4	86.78	153.54	138.96	182.32
mml-miR-503-5p	-0.0357518	7.29792	0.927333	0.980628	132.64	138.28	176.43	209.25	102.85	142.62	32.04	151.55	233.45	164.6	107.69	34.11
mml-miR-324-5p	0.031151	7.57403	0.934265	0.985127	174.81	160.73	103.32	80.68	207.8	231.71	250.54	151.55	113.85	199.82	176.17	162.25
mml-miR-371-5p	0.0289673	0.708032	0.938229	0.986481	1.19	1.33	1.85	0.51	0.55	2.27	0.78	2.58	0.58	0.21	2.71	0.54
mml-miR-373	0.0285235	1.69886	0.943065	0.98874	2.68	2.47	9.36	0.42	0.33	2.92	0.35	7.4	0.25	0.86	3.49	0.36
mml-miR-223	0.0395714	15.1264	0.949214	0.991313	31619.7	30906.6	27583.3	20516.4	29134.3	45335.5	35528.9	30407.1	19563.7	34782.4	36202.8	33577.2
mml-miR-505-5p	-0.0168668	2.72648	0.952302	0.991313	5.7	5.65	4.48	4.39	4.98	10.49	4.15	5.49	4.43	5.37	8.21	4.77
mml-miR-576-5p	-0.0164379	5.52514	0.955447	0.991313	42.47	39	13.16	23.15	44.79	43.79	87.49	31.95	17.29	43.91	51.53	50.31
mml-miR-17-3p	-0.0172535	2.7867	0.956898	0.991313	5.87	5.81	5.26	8.62	7.74	4.54	3.2	6.17	5.93	4.29	7.51	5.13
mml-miR-323a-3p	0.0117853	5.10846	0.958988	0.991313	30.51	30.31	18.81	20.61	31.63	44.87	36.62	27.8	19.38	28.45	45.42	30.51
mml-miR-331-5p	-0.0123492	5.63024	0.963152	0.992829	41.81	42.46	51.47	49.33	44.24	30.92	33.08	51	46.94	37.47	34.06	42.84
mml-miR-16-5p	-0.0373653	17.3077	0.967827	0.99303	140626	130785	252347	224927	35897.5	76831.2	113126	177001	220349	104843	78221.3	73510
mml-miR-150-5p	-0.0216705	14.4569	0.968957	0.99303	20210.1	19536.5	14488.3	14933.4	15804.4	37934.3	17890.1	14887.9	18889.2	19491.1	23956.9	20457.6
mml-miR-374a-3p	-0.0153953	1.20963	0.971954	0.99303	1.82	1.85	1.56	0.84	0.77	1.95	3.97	3.47	1.42	0.64	2.79	0.9
mml-miR-379-5p	0.00930928	3.88789	0.974141	0.99303	12.75	12.01	20.27	23.15	4.31	7.03	8.98	13.45	22.47	9.56	8.82	5.76
mml-miR-933	-0.00953662	0.875967	0.9795	0.995735	1.45	1.35	0.1	1.69	2.1	0.32	3.02	0.34	1.25	2.04	0.44	2.7
mml-miR-190a-5p	0.00693375	6.37128	0.986788	0.996599	68.38	76.36	129.06	20.53	3.32	138.4	50.61	114.89	11.61	7.95	215.74	31.59
mml-miR-5697-3p	-0.00472476	1.66901	0.98815	0.996599	2.58	2.58	2.34	1.86	3.1	1.62	3.97	3.59	2.51	3.01	1.75	2.07
mml-miR-222-3p	-0.00481377	8.02522	0.988474	0.996599	222.92	219.11	321.18	306.23	200.72	151.05	135.42	249.85	294.18	162.99	183.07	205.45
mml-let-7g-5p	0.00238747	12.7972	0.995566	0.998723	6499.34	5191.21	14569.6	10276.5	1283.3	2661.91	3705.38	7330.52	8598.56	4289.44	2766.95	2970.61
mml-miR-299-5p	0.00173904	6.38703	0.996118	0.998723	75.85	73.54	33.53	55.84	92.79	116.77	80.32	57.17	50.45	78.06	110.66	71.36
mml-miR-299-3p	-0.000694036	2.09366	0.998723	0.998723	3.4	3.59	4.87	4.48	1.77	3.57	2.33	4.26	5.68	3.97	2.71	1.35

## Sheet: H. DE_smallRNA_Grp2_Grp1
DE_smallRNA_Group2_vs_Group1_1
names	logFC	logCPM	PValue	FDR	Group2	Group1	Group1:2	Group2:4	Group2:7	Group1:10	Group2:13	Group1:18	Group2:19	Group1:20	Group2:27	Group1:30
ENSMMUG00000026512	-2.93391	6.76274	0.00918819	1	4.81	83.66	30.36	0	0	29.16	0	130.88	24.05	159.41	0	68.5
ENSMMUG00000036436	0.569107	14.1899	0.0282013	1	22278.9	15007.5	14966.5	32162.5	24880.5	11198.3	21234.5	16622.1	19771.3	20126	13345.7	12124.5
ENSMMUG00000024536	-1.10142	8.29564	0.0284034	1	146.21	340.05	333.94	57.64	266.49	379.11	190.44	218.14	216.47	597.8	0	171.25
ENSMMUG00000026536	-0.609351	9.69973	0.0392219	1	609.81	916.46	789.31	806.94	654.11	1224.82	380.89	828.92	457	677.51	750.11	1061.75
ENSMMUG00000024990	2.3383	6.59975	0.0458971	1	51.39	6.85	0	57.64	24.23	0	47.61	0	96.21	0	31.25	34.25
ENSMMUG00000024168	-1.81194	6.65985	0.0465182	1	9.66	59.85	30.36	0	24.23	58.32	0	130.88	24.05	79.71	0	0
ENSMMUG00000025523	0.608185	12.6181	0.052976	1	7562.3	4941.38	3551.9	11700.7	3125.2	4928.43	8617.58	6238.75	6710.71	5021.53	7657.35	4966.27
ENSMMUG00000026130	0.633201	9.95741	0.0600341	1	1101.97	723.71	728.59	749.3	1259.77	612.41	761.78	305.39	1395.06	1115.9	1343.94	856.25
ENSMMUG00000027952	1.64769	7.02821	0.0656703	1	115.41	32.27	0	172.92	24.23	0	238.05	87.26	48.11	39.85	93.76	34.25
ENSMMUG00000027821	-0.724441	8.88002	0.0688953	1	317.41	506.32	607.16	403.47	266.49	466.6	380.89	785.3	192.42	398.53	343.8	274
ENSMMUG00000034195	-1.75002	6.85443	0.0773191	1	25.86	81.24	60.72	57.64	0	87.49	47.61	218.14	24.05	39.85	0	0
ENSMMUG00000024923	0.503037	9.90426	0.0790183	1	1018.98	735.32	850.03	518.75	1308.22	845.71	952.22	698.04	1034.27	597.8	1281.43	685
ENSMMUG00000028035	-1.62323	6.60562	0.079461	1	9.66	49.47	91.07	0	24.23	29.16	0	87.26	24.05	39.85	0	0
ENSMMUG00000028097	-1.63967	6.6107	0.0817966	1	9.66	52.8	30.36	0	24.23	0	0	130.88	24.05	0	0	102.75
ENSMMUG00000025719	0.638094	9.85212	0.0870734	1	1031.6	669.67	364.3	691.67	557.21	641.57	1047.44	523.53	1611.53	757.21	1250.18	1061.75
ENSMMUG00000037181	0.987196	7.58828	0.0906893	1	161.53	80.91	121.43	115.28	169.58	87.49	142.83	87.26	192.42	39.85	187.53	68.5
ENSMMUG00000024826	-0.581262	9.03229	0.100215	1	374.46	552.49	485.73	403.47	387.62	495.76	571.33	698.04	384.84	637.65	125.02	445.25
ENSMMUG00000034909	-1.31746	7.11898	0.101838	1	39.37	107.13	60.72	0	24.23	87.49	47.61	130.88	0	119.56	125.02	137
ENSMMUG00000027657	-1.62334	6.79257	0.107685	1	17.35	66.89	60.72	0	24.23	87.49	0	43.63	0	39.85	62.51	102.75
ENSMMUG00000035653	1.36762	6.76805	0.111008	1	71.95	23.55	0	115.28	24.23	0	95.22	43.63	0	39.85	125.02	34.25
ENSMMUG00000028206	1.5013	6.78906	0.112397	1	71.1	17.5	0	115.28	96.91	87.49	95.22	0	48.11	0	0	0
ENSMMUG00000024646	-1.15816	7.37785	0.121202	1	63.62	139.94	273.22	0	24.23	58.32	190.44	174.51	72.16	159.41	31.25	34.25
ENSMMUG00000028083	-1.11659	7.0322	0.121249	1	36.46	87.13	91.07	0	0	116.65	47.61	0	72.16	159.41	62.51	68.5
ENSMMUG00000037345	0.403972	10.3419	0.121982	1	1386.24	1059.66	1123.25	1210.41	2010.79	1108.17	1237.88	741.67	1346.95	1434.72	1125.16	890.5
ENSMMUG00000025560	0.406237	10.2108	0.123187	1	1247.11	968.55	941.1	691.67	1453.58	845.71	1190.27	1003.44	1274.79	956.48	1625.23	1096
ENSMMUG00000026293	-1.35034	6.7067	0.126917	1	15.91	59.73	60.72	0	24.23	29.16	0	174.51	24.05	0	31.25	34.25
ENSMMUG00000027918	2.84426	6.32707	0.131347	1	23.99	0	0	0	24.23	0	47.61	0	48.11	0	0	0
ENSMMUG00000034526	-2.94519	6.34411	0.132386	1	0	33.39	0	0	0	0	0	87.26	0	79.71	0	0
ENSMMUG00000025282	-2.94564	6.34342	0.133336	1	0	33.03	0	0	0	0	0	130.88	0	0	0	34.25
ENSMMUG00000036226	1.96484	6.50063	0.136328	1	37.93	6.85	0	0	24.23	0	47.61	0	24.05	0	93.76	34.25
ENSMMUG00000027969	-1.41757	6.55238	0.137879	1	9.66	40.98	121.43	0	24.23	0	0	43.63	24.05	39.85	0	0
ENSMMUG00000024671	0.402821	10.1011	0.146323	1	1157.8	889.07	1275.04	922.22	1502.04	699.9	1142.66	828.92	1346.95	956.48	875.13	685
ENSMMUG00000026614	0.556017	9.05097	0.152129	1	526.2	368.03	364.3	230.56	532.98	583.25	333.28	305.39	721.58	278.97	812.62	308.25
ENSMMUG00000024450	0.510232	9.21904	0.152613	1	625.59	441.47	516.09	461.11	654.11	320.79	952.22	567.16	529.16	597.8	531.33	205.5
ENSMMUG00000036757	0.674193	8.96994	0.155852	1	580.54	344.17	394.66	1268.05	193.81	291.62	666.55	305.39	336.74	557.95	437.56	171.25
ENSMMUG00000026454	0.650072	7.88053	0.15797	1	203.83	126.66	121.43	230.56	169.58	204.14	142.83	130.88	288.63	39.85	187.53	137
ENSMMUG00000026185	-1.08476	7.34039	0.16272	1	64.39	126.91	182.15	115.28	48.45	87.49	47.61	0	48.11	159.41	62.51	205.5
ENSMMUG00000027468	1.47956	6.78975	0.166428	1	65.19	20.87	60.72	0	48.45	0	142.83	43.63	72.16	0	62.51	0
ENSMMUG00000024262	-1.02188	7.39598	0.170036	1	69.24	133.47	212.51	115.28	72.68	116.65	47.61	87.26	48.11	79.71	62.51	171.25
ENSMMUG00000025348	-0.65572	8.69616	0.173316	1	284.44	429.29	303.58	288.19	193.81	554.08	476.11	479.9	120.26	637.65	343.8	171.25
ENSMMUG00000026455	0.354531	11.2557	0.179738	1	2636.42	2084.17	2398.29	1786.8	3391.69	2216.34	1809.22	1439.71	2693.9	2311.5	3500.5	2055.01
ENSMMUG00000024688	-0.829527	8.09366	0.188121	1	153.97	267.27	182.15	115.28	193.81	116.65	333.28	130.88	96.21	358.68	31.25	548
ENSMMUG00000024346	-0.806796	7.87133	0.189144	1	130.54	210.48	182.15	230.56	48.45	262.46	142.83	43.63	168.37	358.68	62.51	205.5
ENSMMUG00000023833	0.353292	10.2836	0.190935	1	1315.35	1031.31	941.1	1325.69	1647.39	1079.01	1047.44	479.9	1274.79	1355.02	1281.43	1301.5
ENSMMUG00000024083	-1.6161	6.61658	0.194591	1	14.33	52.15	30.36	0	0	29.16	47.61	87.26	24.05	79.71	0	34.25
ENSMMUG00000026409	-0.633338	8.91478	0.194978	1	355.96	518.15	425.01	691.67	169.58	204.14	476.11	741.67	192.42	637.65	250.04	582.25
ENSMMUG00000024462	-0.433272	9.88438	0.197349	1	766.28	1006.14	789.31	922.22	775.24	874.87	1095.05	828.92	601.32	996.34	437.56	1541.26
ENSMMUG00000036683	-0.517987	9.05859	0.203563	1	385.3	557.15	667.88	634.03	339.17	379.11	142.83	872.55	529.16	557.95	281.29	308.25
ENSMMUG00000026410	0.562821	8.06236	0.20734	1	246.77	162.13	242.86	288.19	145.36	87.49	285.67	218.14	264.58	159.41	250.04	102.75
ENSMMUG00000034870	0.650393	7.96497	0.208223	1	237.12	145.77	0	288.19	193.81	145.81	333.28	218.14	120.26	159.41	250.04	205.5
ENSMMUG00000033596	-0.617368	8.2203	0.212207	1	191.41	282.7	303.58	172.92	96.91	204.14	285.67	392.65	120.26	239.12	281.29	274
ENSMMUG00000034680	-0.594464	8.76177	0.215509	1	307.38	458.72	212.51	461.11	314.94	174.97	380.89	698.04	192.42	797.07	187.53	411
ENSMMUG00000026432	0.956916	7.13569	0.217641	1	97.47	47.62	60.72	57.64	96.91	29.16	142.83	0	96.21	79.71	93.76	68.5
ENSMMUG00000034426	-0.50601	9.33359	0.220997	1	496.33	691.84	576.8	806.94	532.98	524.92	523.72	1308.83	336.74	637.65	281.29	411
ENSMMUG00000032750	-0.329456	9.82824	0.225161	1	732.71	935.99	819.67	518.75	629.89	991.52	761.78	610.79	1034.27	956.48	718.85	1301.5
ENSMMUG00000035645	0.342176	9.7971	0.225411	1	916.74	715.37	1092.89	922.22	920.6	816.55	761.78	436.28	1010.21	717.36	968.89	513.75
ENSMMUG00000033201	-1.19984	6.5081	0.230975	1	9.66	40.24	0	0	24.23	0	0	87.26	24.05	79.71	0	34.25
ENSMMUG00000033056	0.613253	8.21389	0.241481	1	283.19	181.16	151.79	288.19	121.13	58.32	333.28	130.88	360.79	119.56	312.54	445.25
ENSMMUG00000035865	-0.991934	6.98822	0.242531	1	36.53	76	91.07	0	48.45	174.97	47.61	0	24.05	79.71	62.51	34.25
ENSMMUG00000033837	-0.182475	14.0155	0.242662	1	15489.2	17510.2	18700.6	19078.4	14317.8	18838.9	14664.2	13437.3	13758.1	19209.3	15627.2	17364.8
ENSMMUG00000036516	0.408827	9.33095	0.246105	1	659.83	504.08	303.58	518.75	726.79	349.95	952.22	698.04	601.32	518.09	500.07	650.75
ENSMMUG00000023939	1.31722	6.74465	0.248123	1	53.87	23.55	0	0	72.68	0	47.61	43.63	24.05	39.85	125.02	34.25
ENSMMUG00000027733	-1.33485	6.71175	0.248323	1	21.18	59.21	91.07	57.64	24.23	0	0	130.88	24.05	39.85	0	34.25
ENSMMUG00000032774	-0.208917	11.8128	0.248861	1	3245.9	3791.63	3703.69	2363.19	3827.77	4403.51	2951.88	2966.68	3367.38	3945.49	3719.28	3938.76
ENSMMUG00000023953	-0.724916	7.5767	0.249163	1	94.21	147.08	182.15	115.28	48.45	262.46	47.61	0	72.16	119.56	187.53	171.25
ENSMMUG00000023878	-1.3174	6.70395	0.25084	1	21.15	53.55	60.72	57.64	0	87.49	0	0	48.11	119.56	0	0
ENSMMUG00000025271	-1.34937	6.71372	0.252492	1	19.14	61.87	60.72	0	0	0	47.61	174.51	48.11	39.85	0	34.25
ENSMMUG00000026204	0.288942	10.7123	0.252919	1	1756.85	1444.58	1396.47	1613.89	2422.64	1866.39	1333.11	916.18	1539.37	1673.84	1875.27	1370
ENSMMUG00000032814	0.427626	10.9929	0.255993	1	2256.78	1676.99	2641.15	2420.83	3512.83	1399.79	2190.1	1352.46	2285.01	2032.52	875.13	959
ENSMMUG00000032960	0.535025	8.09065	0.255999	1	248.66	166.89	182.15	230.56	242.26	116.65	380.89	130.88	264.58	199.27	125.02	205.5
ENSMMUG00000026241	-2.57466	6.2752	0.256272	1	0	21.65	30.36	0	0	0	0	43.63	0	0	0	34.25
ENSMMUG00000025824	-2.57066	6.2734	0.256278	1	0	20.63	30.36	0	0	29.16	0	43.63	0	0	0	0
ENSMMUG00000027575	-2.57066	6.2734	0.256278	1	0	20.63	30.36	0	0	29.16	0	43.63	0	0	0	0
ENSMMUG00000034851	2.51842	6.27772	0.256356	1	25.86	0	0	57.64	0	0	47.61	0	24.05	0	0	0
ENSMMUG00000027817	2.49101	6.26478	0.256538	1	15.87	0	0	0	0	0	0	0	48.11	0	31.25	0
ENSMMUG00000024746	2.49971	6.2689	0.256592	1	19.14	0	0	0	0	0	47.61	0	48.11	0	0	0
ENSMMUG00000035944	2.49971	6.2689	0.256592	1	19.14	0	0	0	0	0	47.61	0	48.11	0	0	0
ENSMMUG00000028119	2.50274	6.27039	0.256642	1	21.15	0	0	57.64	0	0	0	0	48.11	0	0	0
ENSMMUG00000035191	-2.56415	6.27057	0.256657	1	0	18.51	0	0	0	58.32	0	0	0	0	0	34.25
ENSMMUG00000027352	-2.56105	6.26925	0.256658	1	0	17.74	30.36	0	0	58.32	0	0	0	0	0	0
ENSMMUG00000036603	-2.57171	6.27387	0.256714	1	0	20.87	60.72	0	0	0	0	43.63	0	0	0	0
ENSMMUG00000035915	0.486558	8.59558	0.257534	1	362.75	259.58	455.37	288.19	581.43	204.14	333.28	130.88	360.79	199.27	250.04	308.25
ENSMMUG00000024743	0.35816	11.5899	0.257696	1	3362.85	2627.89	3885.83	2593.75	5402.48	3499.48	2618.6	1701.48	3199.01	2271.64	3000.43	1781.01
ENSMMUG00000024056	0.403418	12.2703	0.258951	1	5529.47	4186.23	5312.66	5821.52	9109.12	4257.7	3094.71	2094.13	6277.76	5738.89	3344.23	3527.76
ENSMMUG00000035403	-0.203213	12.8828	0.264128	1	6986.62	8000.29	8318.12	8645.82	7534.4	8427.91	6998.81	9423.57	5315.65	6296.84	6438.42	7535.03
ENSMMUG00000034384	-0.478117	10.0469	0.265662	1	849.73	1172.68	637.52	1440.97	508.75	495.76	714.16	1396.08	865.9	2032.52	718.85	1301.5
ENSMMUG00000034936	-0.522841	7.9655	0.272271	1	148.12	221.94	151.79	172.92	218.04	204.14	142.83	349.02	144.32	199.27	62.51	205.5
ENSMMUG00000037192	0.269239	12.2657	0.272961	1	5280.49	4403.53	5737.68	4034.72	7582.86	3936.92	4475.43	3097.56	5965.07	5101.24	4344.37	4144.27
ENSMMUG00000025750	-0.466138	9.95489	0.274849	1	774.57	1062.73	698.24	749.3	581.43	1545.6	666.55	479.9	625.37	637.65	1250.18	1952.26
ENSMMUG00000024633	-0.804482	7.02916	0.275903	1	43.27	80.01	91.07	57.64	0	145.81	0	43.63	96.21	119.56	62.51	0
ENSMMUG00000025577	-0.545018	8.41681	0.279174	1	222.65	320.44	455.37	288.19	169.58	291.62	95.22	261.77	216.47	79.71	343.8	513.75
ENSMMUG00000037409	-0.791376	7.32622	0.285744	1	79.19	120.91	91.07	172.92	48.45	116.65	95.22	174.51	48.11	119.56	31.25	102.75
ENSMMUG00000032834	0.628841	7.76045	0.285792	1	182.61	113.26	30.36	172.92	193.81	262.46	190.44	130.88	168.37	39.85	187.53	102.75
ENSMMUG00000035863	0.484257	8.29055	0.286821	1	294.36	209.61	242.86	288.19	266.49	87.49	380.89	392.65	192.42	119.56	343.8	205.5
ENSMMUG00000035738	-0.561929	7.82697	0.288152	1	121.27	189.58	242.86	57.64	193.81	174.97	95.22	130.88	72.16	159.41	187.53	239.75
ENSMMUG00000027767	0.98099	6.80277	0.289979	1	64.43	32.27	0	115.28	72.68	0	47.61	87.26	24.05	39.85	62.51	34.25
ENSMMUG00000026811	-0.845969	6.82994	0.291776	1	30.24	57.92	30.36	0	24.23	116.65	47.61	0	48.11	39.85	31.25	102.75
ENSMMUG00000035750	0.458882	8.80595	0.294435	1	450.65	321.76	60.72	518.75	218.04	408.27	571.33	261.77	601.32	398.53	343.8	479.5
ENSMMUG00000026405	0.309541	11.6714	0.298413	1	3523.96	2856.6	3794.76	3112.5	5184.45	2303.82	3618.43	3664.72	3704.12	2670.18	2000.29	1849.51
ENSMMUG00000025711	-0.998957	6.76234	0.300084	1	27.47	62.99	60.72	57.64	48.45	0	0	174.51	0	79.71	31.25	0
ENSMMUG00000024283	-0.198984	11.8338	0.300952	1	3322.59	3835.35	2975.09	2997.22	2834.49	4082.73	2999.49	3839.23	3968.7	3347.69	3813.05	4932.02
ENSMMUG00000037416	-1.4296	6.55844	0.305282	1	9.62	45.19	30.36	0	0	0	0	87.26	48.11	39.85	0	68.5
ENSMMUG00000032720	0.484681	8.10785	0.305788	1	247.84	171.19	212.51	230.56	218.04	145.81	285.67	87.26	192.42	239.12	312.54	171.25
ENSMMUG00000033750	0.62096	7.73451	0.306557	1	193.64	121.23	91.07	403.47	145.36	29.16	142.83	218.14	120.26	199.27	156.27	68.5
ENSMMUG00000035614	-0.968144	6.60274	0.308436	1	14.54	42.67	30.36	0	72.68	29.16	0	0	0	119.56	0	34.25
ENSMMUG00000028350	1.29272	6.5639	0.309717	1	46.65	13.7	0	115.28	24.23	0	0	0	0	0	93.76	68.5
ENSMMUG00000024706	0.531516	8.34029	0.3118	1	318.9	214.78	212.51	461.11	363.4	233.3	428.5	479.9	216.47	79.71	125.02	68.5
ENSMMUG00000037212	-0.295732	14.0682	0.319067	1	15331.2	18849.3	15968.4	10490.3	20011	24846.3	12426.5	9990.72	21382.9	21520.8	12345.5	21920.1
ENSMMUG00000037073	-0.690724	8.13081	0.320256	1	152.06	259.99	121.43	57.64	72.68	262.46	0	43.63	192.42	358.68	437.56	513.75
ENSMMUG00000027412	-0.987809	6.88788	0.325474	1	36.99	70.15	60.72	57.64	48.45	58.32	47.61	43.63	0	119.56	31.25	68.5
ENSMMUG00000025148	-0.546571	8.09415	0.327578	1	177.4	248.39	242.86	288.19	266.49	174.97	190.44	305.39	48.11	278.97	93.76	239.75
ENSMMUG00000025173	0.32023	9.42739	0.329279	1	704.57	560.41	516.09	806.94	605.66	408.27	809.39	959.81	457	438.39	843.87	479.5
ENSMMUG00000033587	0.386483	9.92364	0.329675	1	1027.6	786.29	880.38	979.86	484.53	554.08	1285.5	610.79	1731.79	1235.46	656.34	650.75
ENSMMUG00000026039	-0.248605	9.97808	0.332391	1	846.65	1020.12	1396.47	634.03	751.02	1020.68	857	916.18	1178.58	876.77	812.62	890.5
ENSMMUG00000026727	0.761875	6.85371	0.338127	1	77.58	32.8	60.72	172.92	0	29.16	142.83	0	72.16	39.85	0	34.25
ENSMMUG00000024487	-0.238546	10.0486	0.338307	1	900.51	1071.43	1305.4	806.94	775.24	991.52	857	916.18	1250.74	876.77	812.62	1267.25
ENSMMUG00000026768	-0.453926	8.86626	0.339111	1	354.63	478.76	394.66	461.11	266.49	174.97	523.72	1003.44	240.53	478.24	281.29	342.5
ENSMMUG00000025102	0.229745	16.8285	0.341014	1	125556	107075	101882	108419	161009	131260	108172	57501.2	114130	114858	136051	129876
ENSMMUG00000026110	-0.294968	10.1069	0.34132	1	956.12	1142.09	789.31	1383.33	581.43	1079.01	952.22	1396.08	769.69	1076.04	1093.91	1370
ENSMMUG00000026180	0.225234	11.1885	0.354624	1	2432.21	2083.29	2216.14	2478.47	3464.37	2682.93	1952.05	1526.97	2453.38	2072.38	1812.76	1918.01
ENSMMUG00000025257	-0.362233	8.94955	0.355097	1	378.37	488.86	394.66	345.83	242.26	262.46	428.5	698.04	312.69	438.39	562.58	650.75
ENSMMUG00000025046	-0.555851	7.56784	0.356855	1	101.48	149.91	151.79	172.92	96.91	58.32	47.61	174.51	96.21	159.41	93.76	205.5
ENSMMUG00000034149	0.528497	7.86203	0.359216	1	199.84	127.7	151.79	288.19	145.36	262.46	190.44	87.26	312.69	0	62.51	137
ENSMMUG00000027698	-0.86024	6.96845	0.363024	1	48.45	73.54	151.79	115.28	0	58.32	47.61	43.63	48.11	79.71	31.25	34.25
ENSMMUG00000024365	0.402395	8.84878	0.365374	1	421.12	339.64	333.94	230.56	557.21	262.46	238.05	218.14	673.48	438.39	406.31	445.25
ENSMMUG00000026044	0.650819	7.29026	0.365747	1	107.09	65.85	91.07	57.64	96.91	116.65	142.83	87.26	144.32	0	93.76	34.25
ENSMMUG00000037326	0.993274	6.65054	0.366748	1	45.28	20.65	0	57.64	121.13	29.16	47.61	0	0	39.85	0	34.25
ENSMMUG00000028064	0.273072	9.27466	0.369137	1	597.73	496.71	667.88	576.39	702.57	495.76	476.11	436.28	577.26	438.39	656.34	445.25
ENSMMUG00000027480	-0.293507	11.966	0.370686	1	3558.32	4346.67	5039.44	4899.3	3100.98	3062.05	3856.49	7896.6	2934.43	2789.74	3000.43	2945.51
ENSMMUG00000023961	0.531853	7.55675	0.373322	1	140.49	101.66	60.72	115.28	193.81	58.32	95.22	87.26	48.11	199.27	250.04	102.75
ENSMMUG00000028067	0.38727	8.94526	0.380175	1	505.46	379.03	242.86	691.67	266.49	262.46	571.33	654.41	216.47	358.68	781.36	376.75
ENSMMUG00000024902	0.228885	11.5599	0.382762	1	3196.42	2720.04	3339.39	3804.16	3440.15	1924.71	3189.93	1919.62	3078.75	4224.46	2469.1	2192.01
ENSMMUG00000036232	0.304578	9.73732	0.384225	1	847.5	710.12	607.16	403.47	1162.87	758.22	999.83	828.92	889.95	876.77	781.36	479.5
ENSMMUG00000036216	1.11493	6.34544	0.385464	1	27.3	8.73	0	57.64	0	0	47.61	43.63	0	0	31.25	0
ENSMMUG00000024276	-1.56668	6.39296	0.385475	1	6.25	26.7	60.72	0	0	29.16	0	43.63	0	0	31.25	0
ENSMMUG00000037053	1.47112	6.40171	0.385506	1	33.55	6.85	0	57.64	0	0	47.61	0	0	0	62.51	34.25
ENSMMUG00000025452	-1.55367	6.39807	0.385638	1	11.53	26.46	30.36	57.64	0	58.32	0	43.63	0	0	0	0
ENSMMUG00000028536	-0.281613	11.2224	0.386332	1	2098.13	2553.47	3885.83	2132.64	1792.75	1341.47	2094.88	3839.23	2188.8	1474.58	2281.58	2226.26
ENSMMUG00000027929	1.44128	6.38542	0.386399	1	23.95	6.07	30.36	0	0	0	47.61	0	72.16	0	0	0
ENSMMUG00000026582	-1.57614	6.39707	0.386668	1	6.25	29.59	60.72	0	0	0	0	87.26	0	0	31.25	0
ENSMMUG00000027320	-0.346712	9.06079	0.386783	1	426.49	529.5	303.58	691.67	242.26	524.92	380.89	741.67	505.11	597.8	312.54	479.5
ENSMMUG00000024995	-1.60015	6.3989	0.388429	1	4.81	33.03	0	0	0	0	0	130.88	24.05	0	0	34.25
tRNA-Arg-TCG-2-1	-1.60015	6.3989	0.388429	1	4.81	33.03	0	0	0	0	0	130.88	24.05	0	0	34.25
ENSMMUG00000027793	-0.620434	7.06646	0.397353	1	49.06	79.16	91.07	0	72.68	116.65	47.61	0	0	119.56	125.02	68.5
ENSMMUG00000033035	0.270821	10.7136	0.403564	1	1736.89	1448.14	1791.13	1095.14	1986.56	2070.53	1190.27	916.18	1755.85	1195.6	2656.63	1267.25
ENSMMUG00000028451	-0.716431	6.78772	0.408301	1	25.6	57.1	60.72	0	72.68	29.16	0	87.26	24.05	39.85	31.25	68.5
ENSMMUG00000033542	0.84122	6.74843	0.411123	1	56.31	25.71	30.36	115.28	48.45	58.32	0	0	24.05	39.85	93.76	0
ENSMMUG00000033530	0.636306	7.35721	0.411647	1	105.32	69.32	30.36	0	121.13	204.14	95.22	43.63	216.47	0	93.76	68.5
ENSMMUG00000024169	-0.535183	7.49107	0.413225	1	92.38	140.13	91.07	0	24.23	87.49	238.05	305.39	168.37	79.71	31.25	137
ENSMMUG00000034773	0.221762	12.3095	0.414129	1	5371.93	4614.97	4644.79	4438.19	8115.84	5395.03	4523.04	2486.77	5219.44	4622.99	4563.16	5925.27
ENSMMUG00000024353	0.23925	9.24032	0.414829	1	600.62	490.15	576.8	979.86	436.07	379.11	476.11	349.02	673.48	597.8	437.56	548
ENSMMUG00000024102	-0.533508	7.74402	0.415835	1	126.64	176.63	182.15	115.28	121.13	87.49	238.05	174.51	96.21	199.27	62.51	239.75
ENSMMUG00000026648	-0.393671	8.04089	0.41705	1	166.91	228.39	242.86	172.92	242.26	116.65	142.83	349.02	120.26	159.41	156.27	274
ENSMMUG00000023942	0.24756	13.934	0.421328	1	16915.9	14244	10291.4	12622.9	15214.2	22017.6	18330.2	13480.9	12002.3	8887.31	26410	16542.8
ENSMMUG00000034941	-0.312377	8.94475	0.432331	1	379.03	479.72	303.58	345.83	290.72	524.92	380.89	959.81	408.9	199.27	468.82	411
ENSMMUG00000028390	-0.371698	9.04899	0.437107	1	433.55	528.68	455.37	806.94	363.4	437.44	523.72	872.55	192.42	398.53	281.29	479.5
ENSMMUG00000036270	-0.321279	8.70161	0.445472	1	318.18	385.99	333.94	403.47	387.62	437.44	333.28	349.02	216.47	398.53	250.04	411
ENSMMUG00000032760	-0.186911	15.2269	0.447295	1	35832.7	40774.2	31511.7	36543	33602	27470.9	49467.8	50433.5	24389.5	43798.9	35161.3	50655.9
ENSMMUG00000036583	-0.839538	6.84116	0.44761	1	35.09	61.16	60.72	57.64	0	87.49	0	43.63	24.05	79.71	93.76	34.25
ENSMMUG00000025749	-0.422864	9.07675	0.449758	1	433.67	558.48	394.66	979.86	145.36	320.79	285.67	959.81	288.63	637.65	468.82	479.5
ENSMMUG00000024400	0.822802	6.8754	0.45344	1	64.28	37.35	0	57.64	24.23	29.16	95.22	43.63	144.32	79.71	0	34.25
ENSMMUG00000033230	0.240885	11.5331	0.458741	1	3116.02	2641.01	2519.72	2017.36	2834.49	3674.45	2761.44	1047.06	3872.49	2710.03	4094.34	3253.76
ENSMMUG00000033176	0.335441	9.14884	0.459366	1	550.91	444.84	60.72	345.83	411.85	583.25	618.94	479.9	721.58	518.09	656.34	582.25
ENSMMUG00000026121	-0.485487	7.64676	0.463318	1	98.26	150.18	182.15	57.64	169.58	291.62	47.61	43.63	216.47	199.27	0	34.25
ENSMMUG00000024869	-0.223967	13.7804	0.464279	1	12896.5	15071.4	12386.1	9106.93	14923.5	26479.4	11379	7983.85	13758.1	12992.2	15314.7	15515.3
ENSMMUG00000032815	0.186641	10.6875	0.465332	1	1688.07	1466.97	1821.49	1902.08	2059.24	1778.9	1523.55	741.67	1611.53	1554.28	1343.94	1438.51
ENSMMUG00000025419	1.03369	6.50423	0.465818	1	35.52	14.04	30.36	57.64	24.23	0	47.61	0	48.11	39.85	0	0
ENSMMUG00000025903	-0.716426	6.54601	0.466661	1	14.47	32.53	60.72	0	24.23	58.32	0	43.63	48.11	0	0	0
ENSMMUG00000033863	0.194007	10.1944	0.467675	1	1182.56	1028.73	1123.25	1383.33	1356.68	991.52	1095.05	698.04	1202.64	1474.58	875.13	856.25
ENSMMUG00000032848	0.16611	12.3022	0.468029	1	5294.27	4706.31	3825.12	7204.85	5257.12	3703.62	5284.82	5322.57	4786.49	6535.96	3938.07	4144.27
ENSMMUG00000025722	-0.392522	8.86051	0.46876	1	363.1	451.2	516.09	288.19	121.13	408.27	761.78	305.39	144.32	478.24	500.07	548
ENSMMUG00000028178	-0.357731	7.93661	0.471734	1	154.23	200.1	212.51	115.28	242.26	145.81	238.05	174.51	144.32	159.41	31.25	308.25
ENSMMUG00000024647	0.341888	10.0369	0.472806	1	1091.21	863.71	1639.34	1037.5	1259.77	116.65	809.39	828.92	1130.48	637.65	1218.93	1096
ENSMMUG00000036639	1.04947	6.50767	0.473445	1	34.53	13.7	0	0	0	0	47.61	0	0	0	125.02	68.5
ENSMMUG00000027495	-0.24849	11.9932	0.473905	1	3695.37	4373.01	4310.85	5360.41	3440.15	3062.05	4284.99	8289.25	2453.38	2949.15	2937.92	3253.76
ENSMMUG00000035888	1.23432	6.53813	0.473948	1	30.3	12.14	60.72	0	0	0	0	0	120.26	0	31.25	0
ENSMMUG00000035551	0.225557	9.42686	0.484133	1	671.03	569.69	637.52	806.94	605.66	495.76	523.72	261.77	793.74	836.92	625.09	616.5
ENSMMUG00000026792	-0.17169	10.7225	0.484924	1	1497.73	1714.96	1851.84	922.22	1453.58	2187.18	1142.66	1308.83	1876.11	1514.43	2094.05	1712.51
ENSMMUG00000034706	-0.316474	8.68467	0.485479	1	324.59	387.92	303.58	518.75	193.81	291.62	333.28	654.41	264.58	278.97	312.54	411
ENSMMUG00000033896	-0.419107	8.0413	0.48664	1	173.03	220.86	303.58	288.19	48.45	204.14	47.61	43.63	168.37	278.97	312.54	274
ENSMMUG00000024851	0.223458	10.4849	0.488933	1	1470.29	1245.82	1092.89	1613.89	1405.13	2012.2	1285.5	523.53	1828.01	956.48	1218.93	1644.01
ENSMMUG00000036337	-0.219319	10.4238	0.489479	1	1213.87	1418.24	728.59	1613.89	993.28	1283.14	761.78	2137.75	1106.42	1434.72	1593.98	1507.01
ENSMMUG00000028449	0.160602	11.3967	0.494371	1	2775.73	2469.08	3521.54	3054.86	2471.09	2857.91	2285.33	1832.36	3535.75	1873.11	2531.61	2260.51
ENSMMUG00000026596	0.208059	12.5786	0.495925	1	6492.73	5611.35	4007.27	5936.8	4990.63	7640.53	7046.42	6107.87	4738.38	3108.57	9751.4	7192.53
ENSMMUG00000025862	0.166565	11.0631	0.498508	1	2196.01	1950.03	1669.69	2132.64	2059.24	2624.61	2142.49	2399.52	1707.74	1275.31	2937.92	1781.01
ENSMMUG00000025096	0.130516	13.1821	0.501576	1	9624.81	8815.01	9289.57	7608.32	11580.2	9886.03	9236.53	10165.2	8634.92	6137.42	11064.1	8596.78
ENSMMUG00000028377	2.49167	6.26488	0.504165	1	15.91	0	0	0	24.23	0	0	0	24.05	0	31.25	0
ENSMMUG00000025393	2.027	6.20087	0.504277	1	9.66	0	0	0	24.23	0	0	0	24.05	0	0	0
ENSMMUG00000036462	2.027	6.20087	0.504277	1	9.66	0	0	0	24.23	0	0	0	24.05	0	0	0
ENSMMUG00000025030	2.0343	6.2041	0.504284	1	11.1	0	0	0	24.23	0	0	0	0	0	31.25	0
ENSMMUG00000025558	2.0343	6.2041	0.504284	1	11.1	0	0	0	24.23	0	0	0	0	0	31.25	0
ENSMMUG00000028453	2.0343	6.2041	0.504284	1	11.1	0	0	0	24.23	0	0	0	0	0	31.25	0
ENSMMUG00000023981	2.03408	6.204	0.504284	1	11.06	0	0	0	0	0	0	0	24.05	0	31.25	0
ENSMMUG00000025467	2.03408	6.204	0.504284	1	11.06	0	0	0	0	0	0	0	24.05	0	31.25	0
ENSMMUG00000032797	2.03408	6.204	0.504284	1	11.06	0	0	0	0	0	0	0	24.05	0	31.25	0
ENSMMUG00000024248	-2.0997	6.20743	0.504301	1	0	12.68	0	0	0	29.16	0	0	0	0	0	34.25
ENSMMUG00000028237	-2.0997	6.20743	0.504301	1	0	12.68	0	0	0	29.16	0	0	0	0	0	34.25
ENSMMUG00000035843	-2.1008	6.2079	0.504302	1	0	12.92	30.36	0	0	0	0	0	0	0	0	34.25
ENSMMUG00000036399	-2.1008	6.2079	0.504302	1	0	12.92	30.36	0	0	0	0	0	0	0	0	34.25
ENSMMUG00000026703	-2.10495	6.20981	0.504328	1	0	14.56	0	0	0	29.16	0	43.63	0	0	0	0
ENSMMUG00000026787	-2.10495	6.20981	0.504328	1	0	14.56	0	0	0	29.16	0	43.63	0	0	0	0
ENSMMUG00000027370	-2.10495	6.20981	0.504328	1	0	14.56	0	0	0	29.16	0	43.63	0	0	0	0
ENSMMUG00000037362	-2.10607	6.21028	0.504328	1	0	14.8	30.36	0	0	0	0	43.63	0	0	0	0
ENSMMUG00000036596	2.04305	6.20824	0.50433	1	14.37	0	0	0	24.23	0	47.61	0	0	0	0	0
ENSMMUG00000036066	2.05029	6.21137	0.50433	1	15.77	0	0	0	0	0	47.61	0	0	0	31.25	0
ENSMMUG00000024539	-2.10919	6.21162	0.504332	1	0	15.58	0	0	0	0	0	43.63	0	0	0	34.25
ENSMMUG00000036269	-2.10919	6.21162	0.504332	1	0	15.58	0	0	0	0	0	43.63	0	0	0	34.25
ENSMMUG00000032768	-2.11268	6.21316	0.504346	1	0	16.7	0	0	0	0	0	43.63	0	39.85	0	0
ENSMMUG00000035152	2.05341	6.21288	0.504362	1	17.78	0	0	57.64	0	0	0	0	0	0	31.25	0
ENSMMUG00000026229	-0.179569	14.4609	0.505485	1	21055.2	23877.4	21098.9	15101.4	28853.6	29395.6	17235.2	13917.2	27083.3	28774.2	17002.4	26201.3
ENSMMUG00000025533	-0.274042	8.74821	0.513511	1	326.97	401.21	607.16	172.92	314.94	233.3	476.11	567.16	264.58	358.68	406.31	239.75
ENSMMUG00000032811	-0.262975	8.67134	0.515726	1	313.33	377.81	455.37	403.47	290.72	262.46	285.67	567.16	336.74	398.53	250.04	205.5
ENSMMUG00000032946	-0.32384	8.82976	0.520012	1	343.94	418.55	364.3	288.19	363.4	787.38	428.5	130.88	264.58	159.41	375.05	650.75
ENSMMUG00000032751	0.224501	10.7822	0.520114	1	1788.11	1559.12	1760.77	922.22	3052.52	1458.12	1428.33	1134.32	2068.53	2072.38	1468.96	1370
ENSMMUG00000027331	0.804572	6.60652	0.522514	1	41.8	19.77	30.36	57.64	48.45	0	47.61	0	24.05	0	31.25	68.5
ENSMMUG00000027728	-0.608287	6.65741	0.52274	1	24.02	44.41	60.72	0	48.45	0	47.61	87.26	24.05	39.85	0	34.25
ENSMMUG00000035242	-0.474552	7.10669	0.529641	1	57.64	83.34	30.36	57.64	24.23	116.65	47.61	87.26	96.21	79.71	62.51	102.75
ENSMMUG00000024314	0.300777	8.27592	0.530083	1	268.21	210.83	121.43	172.92	121.13	408.27	380.89	130.88	384.84	119.56	281.29	274
ENSMMUG00000027425	0.473457	6.97269	0.535058	1	80.46	47.05	151.79	115.28	48.45	0	190.44	43.63	48.11	39.85	0	0
ENSMMUG00000025472	-0.348416	7.52966	0.535489	1	97.67	136.42	212.51	57.64	169.58	29.16	95.22	218.14	72.16	119.56	93.76	102.75
ENSMMUG00000037310	-0.199734	10.1522	0.554194	1	1020.81	1136.71	1001.82	1152.78	702.57	1603.93	1428.33	1134.32	914	1155.75	906.38	787.75
ENSMMUG00000027752	-0.179685	11.9101	0.55788	1	3565.7	4024.81	5069.8	4322.91	3125.2	3120.37	4094.54	6631.4	2910.38	2391.2	3375.48	2911.26
ENSMMUG00000033222	0.283706	8.4886	0.557904	1	316.79	263.6	303.58	288.19	460.3	262.46	380.89	392.65	360.79	119.56	93.76	239.75
ENSMMUG00000028261	0.252001	7.88946	0.558323	1	202.7	158.13	121.43	345.83	218.04	116.65	238.05	261.77	24.05	119.56	187.53	171.25
ENSMMUG00000025111	0.221414	9.93482	0.564809	1	972.72	830.8	758.95	864.58	896.38	1253.98	904.61	174.51	1322.9	1076.04	875.13	890.5
ENSMMUG00000025136	-0.529428	6.74354	0.565798	1	27	48.89	30.36	0	48.45	58.32	0	87.26	24.05	0	62.51	68.5
ENSMMUG00000025475	0.800097	6.74451	0.567091	1	48.12	31.25	0	57.64	24.23	29.16	0	87.26	96.21	39.85	62.51	0
ENSMMUG00000037064	-0.418954	7.23184	0.569003	1	65.32	94.71	121.43	0	72.68	116.65	95.22	87.26	96.21	79.71	62.51	68.5
ENSMMUG00000028010	0.642635	6.70668	0.575322	1	46.22	29.98	30.36	57.64	48.45	0	0	0	0	119.56	125.02	0
ENSMMUG00000036590	0.182363	9.61256	0.579701	1	747.3	663.04	516.09	576.39	896.38	1137.33	618.94	436.28	769.69	677.51	875.13	548
ENSMMUG00000023922	0.169229	10.7988	0.58565	1	1809.88	1602.64	2276.86	2247.91	2592.22	1895.55	1095.05	1308.83	1707.74	956.48	1406.45	1575.51
ENSMMUG00000032912	0.121459	11.7188	0.586618	1	3416.93	3163.43	3551.9	2709.02	4360.75	3878.59	2666.21	2748.54	3223.06	2829.59	4125.59	2808.51
ENSMMUG00000024665	0.262222	8.01365	0.588291	1	219.65	173.19	182.15	345.83	169.58	174.97	142.83	87.26	96.21	318.83	343.8	102.75
ENSMMUG00000024003	-0.160473	12.7156	0.590535	1	6274.09	7014.43	9957.45	3458.33	7098.33	7640.53	8189.09	3664.72	6061.28	6137.42	6563.44	7672.03
ENSMMUG00000027955	-0.334448	7.27293	0.591547	1	70.73	105.07	30.36	57.64	96.91	58.32	47.61	174.51	120.26	159.41	31.25	102.75
ENSMMUG00000025802	0.155726	10.2804	0.594956	1	1227.56	1105.83	1062.53	864.58	1453.58	1545.6	1333.11	567.16	1298.85	1394.87	1187.67	959
ENSMMUG00000027383	-0.166031	11.8594	0.596474	1	3464.23	3866.45	5069.8	4322.91	2979.85	2712.1	4475.43	6020.61	2886.32	2789.74	2656.63	2740.01
ENSMMUG00000034071	-0.291108	7.31944	0.600177	1	74.49	99.9	182.15	0	24.23	87.49	47.61	87.26	144.32	39.85	156.27	102.75
ENSMMUG00000035737	-0.228611	7.77823	0.601783	1	129.06	163.93	91.07	57.64	193.81	204.14	47.61	130.88	96.21	119.56	250.04	274
ENSMMUG00000035511	-0.480311	7.19682	0.606794	1	69.31	102.26	0	115.28	121.13	29.16	47.61	174.51	0	239.12	62.51	68.5
ENSMMUG00000028099	-0.782907	6.72699	0.607136	1	37.42	54.7	0	115.28	24.23	0	47.61	130.88	0	39.85	0	102.75
ENSMMUG00000024976	-0.266768	7.84999	0.607489	1	142.32	178.91	273.22	115.28	121.13	87.49	95.22	174.51	192.42	119.56	187.53	239.75
ENSMMUG00000035976	0.292853	7.80377	0.608863	1	178.2	142.9	151.79	172.92	266.49	116.65	285.67	218.14	72.16	159.41	93.76	68.5
ENSMMUG00000028439	0.338624	7.33817	0.608988	1	114.81	81.14	151.79	230.56	72.68	58.32	95.22	87.26	144.32	39.85	31.25	68.5
ENSMMUG00000023839	-0.264619	8.91481	0.614945	1	399.78	464.28	273.22	634.03	193.81	379.11	476.11	916.18	288.63	239.12	406.31	513.75
ENSMMUG00000033223	0.22661	8.63922	0.62376	1	364.89	305.5	364.3	576.39	266.49	204.14	190.44	87.26	384.84	597.8	406.31	274
ENSMMUG00000028360	-0.434426	6.91243	0.627409	1	38.03	63.3	60.72	0	24.23	58.32	0	43.63	72.16	119.56	93.76	34.25
ENSMMUG00000027479	0.0994604	12.4099	0.629295	1	5550.23	5192.66	4371.56	4841.66	4893.73	5482.52	5760.93	3751.97	6879.07	7014.2	5375.77	5343.02
ENSMMUG00000024011	-0.538233	6.38478	0.631024	1	9.66	18.75	30.36	0	24.23	29.16	0	0	24.05	0	0	34.25
ENSMMUG00000028397	-0.538233	6.38478	0.631024	1	9.66	18.75	30.36	0	24.23	29.16	0	0	24.05	0	0	34.25
ENSMMUG00000034355	-0.546053	6.38842	0.631047	1	9.66	21.41	0	0	24.23	29.16	0	43.63	24.05	0	0	34.25
ENSMMUG00000034405	-0.549299	6.38992	0.631058	1	9.66	22.53	0	0	24.23	29.16	0	43.63	24.05	39.85	0	0
ENSMMUG00000034673	-1.2184	6.32918	0.631128	1	4.85	18.75	30.36	0	24.23	29.16	0	0	0	0	0	34.25
ENSMMUG00000027812	-1.22164	6.3307	0.631143	1	4.85	19.87	30.36	0	24.23	29.16	0	0	0	39.85	0	0
ENSMMUG00000036041	-1.23067	6.33483	0.631161	1	4.85	22.77	30.36	0	24.23	0	0	43.63	0	39.85	0	0
ENSMMUG00000027410	-1.22656	6.33923	0.631177	1	6.25	23.55	0	0	0	0	0	43.63	0	39.85	31.25	34.25
ENSMMUG00000027638	-1.22656	6.33923	0.631177	1	6.25	23.55	0	0	0	0	0	43.63	0	39.85	31.25	34.25
ENSMMUG00000035295	-1.21059	6.34003	0.631243	1	9.52	21.41	0	0	0	29.16	47.61	43.63	0	0	0	34.25
ENSMMUG00000036495	-1.21796	6.34334	0.631246	1	9.52	23.55	0	0	0	0	47.61	43.63	0	39.85	0	34.25
ENSMMUG00000028030	1.08929	6.33358	0.631256	1	19.18	8.73	0	0	24.23	0	47.61	43.63	24.05	0	0	0
ENSMMUG00000023875	-1.20581	6.34069	0.631276	1	11.53	20.65	0	57.64	0	29.16	0	0	0	39.85	0	34.25
ENSMMUG00000036554	0.661302	6.28013	0.631477	1	21.05	5.83	0	57.64	0	29.16	47.61	0	0	0	0	0
ENSMMUG00000035932	-1.21506	6.33414	0.631575	1	6.25	20.39	0	0	0	58.32	0	43.63	0	0	31.25	0
ENSMMUG00000036398	-1.22286	6.33087	0.631619	1	4.81	19.77	30.36	0	0	0	0	0	24.05	0	0	68.5
ENSMMUG00000025963	-1.2215	6.3305	0.631621	1	4.85	19.53	0	0	24.23	29.16	0	0	0	0	0	68.5
ENSMMUG00000028137	-1.20045	6.33589	0.631624	1	9.52	18.51	0	0	0	58.32	47.61	0	0	0	0	34.25
ENSMMUG00000027435	-1.19732	6.33457	0.631624	1	9.52	17.74	30.36	0	0	58.32	47.61	0	0	0	0	0
ENSMMUG00000025303	-0.558612	6.3932	0.631633	1	9.66	24.67	0	0	24.23	0	0	43.63	24.05	79.71	0	0
ENSMMUG00000024139	-1.23298	6.33511	0.631845	1	4.81	23.28	0	0	0	29.16	0	87.26	24.05	0	0	0
ENSMMUG00000025184	-1.24106	6.33841	0.631846	1	4.81	25.42	0	0	0	0	0	87.26	24.05	39.85	0	0
ENSMMUG00000037221	-1.20928	6.34268	0.631929	1	11.53	22.01	30.36	57.64	0	0	0	0	0	79.71	0	0
ENSMMUG00000025233	-1.21254	6.32685	0.632542	1	4.81	17.5	0	0	0	87.49	0	0	24.05	0	0	0
ENSMMUG00000028034	0.664417	6.28343	0.63255	1	23.06	6.85	0	115.28	0	0	0	0	0	0	0	34.25
ENSMMUG00000036297	0.664417	6.28343	0.63255	1	23.06	6.85	0	115.28	0	0	0	0	0	0	0	34.25
ENSMMUG00000034854	0.332436	7.48339	0.635778	1	129.27	102.42	60.72	230.56	96.91	58.32	95.22	130.88	192.42	159.41	31.25	102.75
ENSMMUG00000026177	-0.195529	12.6314	0.638662	1	5875.5	6729.25	3642.97	5994.44	2931.39	4870.11	7808.2	14789.8	4954.86	4383.87	7688.6	5959.52
ENSMMUG00000026639	-0.473973	7.32289	0.640437	1	73.51	105.02	303.58	57.64	24.23	58.32	47.61	43.63	144.32	119.56	93.76	0
ENSMMUG00000026102	-0.379548	7.51854	0.643092	1	111.04	129.92	121.43	230.56	72.68	174.97	47.61	130.88	48.11	119.56	156.27	102.75
ENSMMUG00000025398	0.315615	7.98549	0.650114	1	205.55	163.37	0	230.56	96.91	233.3	190.44	87.26	384.84	119.56	125.02	376.75
ENSMMUG00000028170	-0.149415	11.8682	0.652429	1	3511.49	3875.12	3916.19	5187.49	3294.79	3062.05	3808.88	6849.54	2453.38	2431.06	2812.9	3116.76
ENSMMUG00000028134	-0.133538	11.7281	0.65287	1	3182.55	3493.47	3430.46	3343.05	3076.75	2653.77	3618.43	6326	2405.27	2351.35	3469.25	2705.76
ENSMMUG00000025611	0.209303	10.4894	0.653146	1	1446.4	1262.06	607.16	922.22	872.15	1283.14	904.61	610.79	2501.48	1514.43	2031.54	2294.76
ENSMMUG00000035047	-0.360877	7.71367	0.659748	1	113.93	151.43	182.15	57.64	96.91	291.62	95.22	43.63	288.63	0	31.25	239.75
ENSMMUG00000025809	0.386372	7.49235	0.660008	1	121.45	97.88	60.72	115.28	193.81	145.81	0	174.51	48.11	39.85	250.04	68.5
ENSMMUG00000026062	-0.116018	10.4344	0.663299	1	1249.24	1368.69	1366.11	1325.69	1598.94	1662.25	904.61	1090.69	1635.58	1594.14	781.36	1130.25
ENSMMUG00000033673	-0.284677	8.86054	0.664829	1	362.36	432.64	273.22	230.56	266.49	729.06	523.72	174.51	72.16	438.39	718.85	548
ENSMMUG00000024424	0.157978	10.977	0.664944	1	2043.24	1845.07	1275.04	1786.8	2422.64	1603.93	1952.05	1047.06	2742.01	3586.81	1312.69	1712.51
ENSMMUG00000033622	-0.314903	7.63386	0.674429	1	113.55	148.52	121.43	115.28	121.13	87.49	47.61	43.63	96.21	318.83	187.53	171.25
ENSMMUG00000033987	0.16028	9.69257	0.679138	1	786.86	721.52	516.09	518.75	557.21	729.06	809.39	567.16	1298.85	1076.04	750.11	719.25
ENSMMUG00000033108	0.0669864	14.2639	0.680507	1	20034.4	19163.1	20977.4	16081.2	20810.5	17234.9	18235	16971.1	21791.8	17376.1	23253.3	23255.8
ENSMMUG00000033610	-0.082797	15.5809	0.68131	1	47532.5	50349.8	47267.5	35736.1	50851.2	68414.8	48896.5	35382	49452.4	45233.6	52726.3	55450.9
ENSMMUG00000033033	-0.165829	9.46868	0.681329	1	590.15	669.69	516.09	403.47	629.89	874.87	380.89	349.02	505.11	478.24	1031.4	1130.25
ENSMMUG00000025160	0.113282	13.1483	0.686226	1	9346.02	8653.4	8287.76	9164.57	11628.7	9769.38	6570.31	4799.04	12459.3	11677	6907.24	8733.78
ENSMMUG00000023907	0.153034	9.46917	0.688541	1	652	605.47	516.09	403.47	726.79	845.71	571.33	479.9	1058.32	637.65	500.07	548
ENSMMUG00000024693	0.206325	8.04783	0.689895	1	237.71	188.65	91.07	345.83	145.36	145.81	476.11	261.77	96.21	239.12	125.02	205.5
ENSMMUG00000027317	0.767315	6.4546	0.694763	1	32.11	12.92	30.36	57.64	0	0	47.61	0	24.05	0	31.25	34.25
ENSMMUG00000036119	0.746916	6.45032	0.69483	1	27.43	14.82	0	57.64	24.23	0	0	0	24.05	39.85	31.25	34.25
ENSMMUG00000033170	0.746519	6.44451	0.695111	1	26.03	12.92	30.36	57.64	48.45	0	0	0	24.05	0	0	34.25
ENSMMUG00000036079	-0.875379	6.45187	0.695183	1	16.37	26.49	0	57.64	24.23	58.32	0	0	0	39.85	0	34.25
ENSMMUG00000024807	1.00662	6.49201	0.695375	1	25.53	14.56	0	0	24.23	29.16	0	43.63	72.16	0	31.25	0
ENSMMUG00000028518	-0.887154	6.45725	0.695505	1	16.37	30.37	30.36	57.64	24.23	0	0	87.26	0	0	0	34.25
ENSMMUG00000033003	0.755607	6.46067	0.695542	1	32.15	17.45	0	57.64	24.23	0	47.61	87.26	0	0	31.25	0
ENSMMUG00000032928	0.753482	6.45821	0.695937	1	32.71	16.7	0	115.28	24.23	0	0	43.63	24.05	39.85	0	0
ENSMMUG00000027853	-0.87234	6.45731	0.695982	1	17.78	28.08	60.72	57.64	0	0	0	0	0	79.71	31.25	0
ENSMMUG00000027498	0.773193	6.4509	0.696078	1	30.11	11.66	0	0	0	58.32	95.22	0	24.05	0	31.25	0
ENSMMUG00000035353	0.771056	6.45121	0.696197	1	32.68	11.9	30.36	115.28	0	29.16	0	0	48.11	0	0	0
ENSMMUG00000024975	-0.268327	7.40672	0.69656	1	82.38	110.19	151.79	0	96.91	0	0	0	96.21	159.41	218.78	239.75
ENSMMUG00000034323	0.111315	12.3871	0.700336	1	5464	5090.08	2944.73	3285.41	5257.12	5890.79	5380.04	5235.31	8177.92	5420.06	5219.5	5959.52
ENSMMUG00000033069	0.14972	9.57951	0.70443	1	718.88	655.56	758.95	576.39	605.66	758.22	428.5	261.77	889.95	916.63	1093.91	582.25
ENSMMUG00000026160	0.0922777	13.098	0.706246	1	8953.54	8419.3	8712.77	7435.41	10199.3	9302.78	7141.64	4842.67	11833.9	10401.7	8157.42	8836.53
ENSMMUG00000024499	-0.0834773	12.7666	0.710095	1	6713.14	7104.91	7407.37	7665.96	6516.9	4753.46	7332.09	6456.89	7456.34	9166.28	4594.41	7740.53
ENSMMUG00000027471	-0.125844	12.1344	0.710491	1	4266.16	4635.91	5464.46	5648.6	3682.41	3266.18	5665.7	7983.85	3271.17	3108.57	3062.94	3356.51
ENSMMUG00000036607	-0.236038	7.90894	0.712578	1	163.41	187.91	212.51	230.56	96.91	145.81	95.22	261.77	144.32	79.71	250.04	239.75
ENSMMUG00000033050	-0.0741427	16.069	0.714505	1	66880.9	70457	77929.2	51240.9	83653.7	71301.9	46182.6	62474.8	74346.9	60776.4	78980.1	79802.8
ENSMMUG00000034081	-0.18299	8.45848	0.71461	1	263.57	300.51	333.94	172.92	169.58	262.46	333.28	130.88	360.79	398.53	281.29	376.75
ENSMMUG00000034442	-0.118025	10.8548	0.715683	1	1749.5	1863.45	1578.62	2881.94	1114.41	1516.44	1713.99	2181.38	1443.16	2431.06	1593.98	1609.76
ENSMMUG00000025832	-0.116129	11.7558	0.72002	1	3242.03	3511.65	2853.66	2132.64	3415.92	6153.25	3618.43	2312.26	2886.32	2231.79	4156.85	4007.26
ENSMMUG00000034390	-0.247754	7.84822	0.723374	1	160.19	184.49	91.07	172.92	121.13	58.32	285.67	305.39	96.21	159.41	125.02	308.25
ENSMMUG00000026037	0.0926203	10.4985	0.724691	1	1437.75	1325.3	1062.53	1902.08	1065.96	1924.71	1142.66	828.92	1515.32	1474.58	1562.72	1335.75
ENSMMUG00000037214	0.130898	9.3131	0.724971	1	585.54	535.5	607.16	518.75	508.75	641.57	428.5	305.39	721.58	438.39	750.11	685
ENSMMUG00000028527	0.265179	7.31406	0.725669	1	110.3	80.13	151.79	115.28	72.68	87.49	190.44	87.26	48.11	39.85	125.02	34.25
ENSMMUG00000025132	-0.126048	11.1474	0.732441	1	2092.17	2283.1	2459	1786.8	2107.7	2682.93	1475.94	1003.44	1683.69	1673.84	3406.74	3596.26
ENSMMUG00000028123	-0.716956	6.56297	0.735329	1	21.15	38.34	30.36	57.64	0	0	0	87.26	48.11	39.85	0	34.25
ENSMMUG00000036486	-0.372646	6.6059	0.735975	1	22.19	37.09	0	0	48.45	58.32	0	87.26	0	39.85	62.51	0
ENSMMUG00000036811	0.562921	6.56488	0.736921	1	36.99	23.91	0	57.64	48.45	0	47.61	0	0	119.56	31.25	0
ENSMMUG00000026059	0.111945	9.68004	0.737867	1	769.22	716.77	758.95	576.39	823.7	1108.17	666.55	610.79	841.84	557.95	937.63	548
ENSMMUG00000035756	0.765898	6.58494	0.739644	1	29.04	17.74	30.36	0	121.13	58.32	0	0	24.05	0	0	0
ENSMMUG00000027976	-0.174	8.11226	0.741351	1	196.52	224.34	212.51	115.28	290.72	233.3	285.67	305.39	72.16	199.27	218.78	171.25
ENSMMUG00000025344	-0.344575	7.15634	0.745495	1	68.74	90.5	0	115.28	0	116.65	0	261.77	72.16	39.85	156.27	34.25
ENSMMUG00000025228	0.113346	11.4464	0.745526	1	2809.18	2612.97	2671.51	2247.91	3052.52	2449.64	1952.05	1134.32	3511.7	4583.14	3281.72	2226.26
ENSMMUG00000024242	0.268195	7.96764	0.745737	1	177.69	161.88	151.79	57.64	218.04	174.97	47.61	43.63	408.9	199.27	156.27	239.75
ENSMMUG00000033155	-0.116405	10.9336	0.748196	1	1806.24	1956.83	1760.77	1095.14	1429.36	2595.45	2142.49	1788.73	1395.06	1036.19	2969.18	2603.01
ENSMMUG00000024729	0.297329	7.52236	0.750709	1	123.56	107.34	121.43	115.28	121.13	58.32	95.22	174.51	192.42	79.71	93.76	102.75
ENSMMUG00000024764	-0.190666	9.53208	0.757017	1	656.1	715.25	1396.47	1037.5	581.43	554.08	952.22	479.9	240.53	597.8	468.82	548
ENSMMUG00000032883	0.212835	8.24837	0.75757	1	254.41	210.74	212.51	115.28	218.04	379.11	380.89	0	120.26	119.56	437.56	342.5
ENSMMUG00000026025	-0.1165	9.3449	0.757991	1	555.7	600.36	1062.53	403.47	411.85	408.27	618.94	436.28	625.37	478.24	718.85	616.5
ENSMMUG00000033806	-0.221236	7.55673	0.759128	1	113.45	127.51	182.15	115.28	121.13	145.81	95.22	87.26	48.11	119.56	187.53	102.75
ENSMMUG00000034836	0.438313	6.65641	0.762788	1	40.33	29.38	0	57.64	24.23	29.16	47.61	43.63	72.16	39.85	0	34.25
ENSMMUG00000024077	0.434073	6.65677	0.763371	1	38.53	30.37	30.36	57.64	48.45	0	0	87.26	24.05	0	62.51	34.25
ENSMMUG00000034628	-0.0988834	13.5137	0.765099	1	11259.3	12044.5	13904	16715.2	10659.6	8748.7	11426.6	21159.4	9837.56	9046.72	7657.35	7363.78
ENSMMUG00000035506	0.252285	6.62051	0.766521	1	45.64	26.96	60.72	172.92	0	0	0	0	24.05	39.85	31.25	34.25
ENSMMUG00000026456	0.110261	13.225	0.769695	1	9828.18	9123.33	15088	4841.66	9206.03	9652.73	6141.81	7111.3	16355.8	5818.6	12595.6	7946.03
ENSMMUG00000026493	-0.0689833	10.5998	0.770601	1	1425.21	1527.09	941.1	1095.14	1502.04	1720.58	857	1570.59	1515.32	1793.4	2156.56	1609.76
ENSMMUG00000033248	-0.156685	8.55072	0.771167	1	276.97	323.99	333.94	288.19	460.3	437.44	95.22	523.53	384.84	119.56	156.27	205.5
ENSMMUG00000027366	0.227614	7.93385	0.771965	1	181.5	156.48	91.07	115.28	218.04	320.79	47.61	0	120.26	199.27	406.31	171.25
ENSMMUG00000026474	-0.0666549	16.3924	0.781236	1	83961.7	87934.7	117941	66976.3	105433	113733	86985.2	61514.9	94310.7	68428.3	66103.2	78056
ENSMMUG00000025425	-0.521483	6.75343	0.783686	1	31.68	51.03	30.36	0	24.23	29.16	47.61	87.26	24.05	39.85	62.51	68.5
ENSMMUG00000037184	0.369478	6.75248	0.784243	1	49.92	35.21	0	57.64	72.68	58.32	95.22	43.63	24.05	39.85	0	34.25
ENSMMUG00000024421	-0.15537	7.79641	0.786036	1	137.57	161.3	273.22	57.64	218.04	145.81	142.83	130.88	144.32	119.56	125.02	137
ENSMMUG00000025382	0.507477	6.78935	0.7889	1	47.98	37.61	0	0	48.45	0	95.22	0	96.21	119.56	0	68.5
ENSMMUG00000027856	-0.0895032	11.9177	0.78985	1	3710.27	3931.89	4523.35	5014.58	3367.47	3266.18	4284.99	6893.16	2790.11	2510.76	3094.19	2466.01
ENSMMUG00000026093	0.461776	6.86537	0.801149	1	54.44	37.51	60.72	57.64	72.68	58.32	0	0	48.11	0	93.76	68.5
ENSMMUG00000024837	-0.14419	7.74381	0.801458	1	143.31	159.05	121.43	57.64	72.68	58.32	285.67	261.77	144.32	79.71	156.27	274
ENSMMUG00000024747	0.10299	10.728	0.801695	1	1669.79	1560.29	758.95	1268.05	1235.55	2187.18	1237.88	698.04	2357.17	1554.28	2250.32	2603.01
ENSMMUG00000028512	0.465365	6.87604	0.802551	1	58.97	41.26	60.72	0	72.68	58.32	142.83	87.26	48.11	0	31.25	0
ENSMMUG00000027547	-0.0846586	12.0223	0.802725	1	4001.66	4224.86	5100.16	4726.38	3028.3	2945.4	5760.93	7024.05	3054.69	2869.44	3437.99	3185.26
ENSMMUG00000027697	0.341264	6.82739	0.803192	1	53.46	36.43	182.15	115.28	72.68	0	0	0	48.11	0	31.25	0
ENSMMUG00000036882	0.450271	6.87566	0.805392	1	57.46	43.16	30.36	0	24.23	58.32	142.83	87.26	120.26	39.85	0	0
ENSMMUG00000036597	-0.0517388	11.7742	0.806194	1	3343.05	3501.36	2975.09	2536.11	3004.07	3966.08	2618.6	2835.8	5243.49	4065.05	3312.98	3664.76
ENSMMUG00000024301	0.322249	6.84347	0.806738	1	60.15	41.96	0	172.92	48.45	29.16	0	43.63	48.11	0	31.25	137
ENSMMUG00000027930	-0.0800952	11.9914	0.814691	1	3920.13	4126.05	5160.87	5072.21	3367.47	3266.18	4903.93	6980.42	3006.59	2311.5	3250.47	2911.26
ENSMMUG00000026788	0.0382423	13.3977	0.815097	1	10863.7	10584.6	12021.8	9510.4	11119.9	9623.57	12855	9598.08	12363.1	11198.8	8469.97	10480.5
ENSMMUG00000024873	-0.265385	6.95658	0.816468	1	46.11	65.97	0	0	24.23	58.32	47.61	43.63	96.21	159.41	62.51	68.5
ENSMMUG00000035513	-0.394319	6.93203	0.816605	1	52.87	63.71	30.36	115.28	0	58.32	0	87.26	24.05	39.85	125.02	102.75
ENSMMUG00000024986	-0.10282	6.9804	0.816771	1	47.69	59.93	60.72	0	48.45	58.32	0	43.63	96.21	0	93.76	137
ENSMMUG00000035420	0.366404	6.95152	0.817058	1	59.71	52.02	60.72	57.64	121.13	0	47.61	130.88	72.16	0	0	68.5
ENSMMUG00000025057	-0.127613	6.98286	0.818802	1	46.28	64.16	121.43	0	72.68	0	0	130.88	96.21	0	62.51	68.5
ENSMMUG00000035659	-0.10353	9.7213	0.824607	1	767.42	810.07	546.45	922.22	654.11	845.71	904.61	1221.57	481.05	717.36	875.13	719.25
ENSMMUG00000032852	0.346284	7.03252	0.825589	1	70	56.34	60.72	0	48.45	29.16	142.83	43.63	96.21	79.71	62.51	68.5
ENSMMUG00000024815	0.328292	7.02076	0.826059	1	64.52	55.22	60.72	57.64	121.13	29.16	47.61	43.63	96.21	39.85	0	102.75
ENSMMUG00000036830	-0.118861	9.31983	0.830008	1	542.49	580.42	516.09	576.39	678.34	1137.33	428.5	130.88	529.16	398.53	500.07	719.25
ENSMMUG00000026127	-0.0510027	12.5849	0.832627	1	5964.8	6174.7	5403.74	4322.91	5547.84	8048.8	7189.26	4755.41	5700.49	4822.26	7063.51	7843.28
ENSMMUG00000023916	0.0909589	7.05562	0.837359	1	78.73	65.95	30.36	172.92	0	58.32	47.61	87.26	48.11	119.56	125.02	34.25
ENSMMUG00000027377	-0.0632684	11.8813	0.843264	1	3651.45	3793.5	5191.23	4899.3	3512.83	2537.12	4237.38	5453.45	2669.85	3148.42	2937.92	2637.26
ENSMMUG00000032918	-0.118743	7.18528	0.847049	1	62.15	80.79	60.72	0	72.68	145.81	0	43.63	144.32	119.56	93.76	34.25
ENSMMUG00000024178	-0.215131	7.12813	0.847274	1	72.08	85.2	0	115.28	48.45	29.16	47.61	174.51	24.05	119.56	125.02	102.75
ENSMMUG00000026686	-0.0946563	9.3807	0.848785	1	594.99	624.81	819.67	979.86	411.85	291.62	380.89	872.55	577.26	557.95	625.09	582.25
ENSMMUG00000025361	0.0647364	12.5444	0.848865	1	6004.33	5766.51	4553.71	4149.99	7195.24	7436.4	4237.38	3402.95	9500.82	7890.97	4938.21	5548.52
ENSMMUG00000027786	0.0859156	9.7421	0.854759	1	795.63	760.37	485.73	691.67	532.98	1137.33	476.11	610.79	1371	677.51	906.38	890.5
ENSMMUG00000026611	-0.0656892	11.7191	0.859498	1	3202.3	3364.86	2398.29	1902.08	2640.68	4695.14	2285.33	1701.48	4088.96	3028.86	5094.48	5000.52
ENSMMUG00000027600	-0.0586378	11.843	0.859581	1	3555.34	3690.07	4067.98	4322.91	3052.52	3032.88	4427.82	6326	3223.06	2112.23	2750.39	2911.26
ENSMMUG00000036730	-0.145046	8.3285	0.865449	1	252.54	273.01	91.07	403.47	96.91	320.79	238.05	479.9	336.74	199.27	187.53	274
ENSMMUG00000025554	-0.0392964	12.6657	0.870474	1	6329.44	6519.67	7498.45	6628.46	8455.01	5628.33	5046.76	4886.29	7360.13	8488.77	4156.85	6096.52
ENSMMUG00000026673	0.0592217	9.95557	0.871451	1	934.18	897.98	880.38	634.03	1017.51	1253.98	1047.44	479.9	1034.27	916.63	937.63	959
ENSMMUG00000033304	0.0760799	10.3514	0.877644	1	1253.68	1208.01	819.67	634.03	1187.09	962.36	1333.11	610.79	1707.74	2311.5	1406.45	1335.75
ENSMMUG00000032878	0.0670469	8.77077	0.878215	1	371.4	355.22	516.09	230.56	436.07	349.95	476.11	305.39	432.95	159.41	281.29	445.25
ENSMMUG00000024535	0.0837158	8.55763	0.881894	1	323.44	297.14	121.43	403.47	242.26	612.41	238.05	261.77	264.58	318.83	468.82	171.25
ENSMMUG00000026085	0.0710635	9.52543	0.895912	1	676.19	644.96	333.94	403.47	387.62	845.71	714.16	174.51	938.06	637.65	937.63	1233
ENSMMUG00000024552	0.121942	7.87112	0.902047	1	167.82	161.57	151.79	172.92	72.68	116.65	47.61	174.51	264.58	159.41	281.29	205.5
ENSMMUG00000028399	0.170485	7.41597	0.902183	1	108.82	97.28	242.86	57.64	24.23	29.16	190.44	174.51	240.53	39.85	31.25	0
ENSMMUG00000033208	0.0262254	12.5706	0.911282	1	6060.07	5960.79	4918.01	5475.69	5014.86	6444.88	5760.93	4188.25	7985.5	6854.78	6063.37	7398.03
ENSMMUG00000024366	-0.148575	7.9224	0.915122	1	175.22	181.41	151.79	403.47	242.26	204.14	47.61	43.63	120.26	199.27	62.51	308.25
ENSMMUG00000025983	-0.110955	8.02653	0.915265	1	192.53	201.86	333.94	172.92	266.49	145.81	333.28	261.77	96.21	199.27	93.76	68.5
ENSMMUG00000036758	-0.0562058	8.83272	0.916541	1	378.88	395.97	151.79	518.75	484.53	437.44	95.22	130.88	264.58	677.51	531.33	582.25
ENSMMUG00000025672	-0.0416629	10.4531	0.92106	1	1315.88	1349.71	1396.47	1671.53	1356.68	1079.01	761.78	698.04	1226.69	1554.28	1562.72	2020.76
ENSMMUG00000027463	0.0508042	8.17861	0.922049	1	243.2	223.24	91.07	288.19	145.36	233.3	380.89	392.65	120.26	159.41	281.29	239.75
ENSMMUG00000032901	0.0787726	9.23984	0.927886	1	522.81	511.21	698.24	288.19	1041.73	670.73	238.05	218.14	577.26	557.95	468.82	411
ENSMMUG00000035871	-0.0157994	9.83668	0.930245	1	819.53	851.3	910.74	403.47	920.6	1049.84	857	654.41	1010.21	956.48	906.38	685
ENSMMUG00000024323	-0.0262111	12.618	0.930595	1	6173.68	6271.57	10109.2	7089.57	6638.03	5395.03	6427.48	7024.05	5868.86	4822.26	4844.45	4007.26
ENSMMUG00000025857	0.0509859	8.67585	0.931891	1	343.37	332.65	364.3	345.83	436.07	408.27	285.67	218.14	336.74	398.53	312.54	274
ENSMMUG00000036503	0.026492	16.1653	0.933456	1	74122.3	72774.8	41408.4	74872.8	41233.3	63748.9	88461.2	121285	72374.6	57149.8	93669.7	80282.3
ENSMMUG00000027769	0.015735	12.0513	0.957315	1	4228.31	4165.68	4462.64	5879.16	4070.03	3557.8	4903.93	7111.3	3319.27	2271.64	2969.18	3425.01
ENSMMUG00000024846	0.0126347	15.3179	0.959953	1	40943.1	40605.2	42015.6	38790.9	64369.5	44035.1	33565.7	31455.5	40360.4	48700.9	27629	36818.9
ENSMMUG00000026265	0.00824544	13.2342	0.977368	1	9571.37	9545.18	10230.7	8472.9	11241	9652.73	7808.2	6675.03	10895.9	10481.4	9438.86	10686
ENSMMUG00000036707	0.00939355	11.4614	0.977782	1	2755.15	2729.21	3430.46	1959.72	2882.94	3528.64	3094.71	1657.85	2212.85	2152.08	3625.52	2877.01
ENSMMUG00000027324	-0.0042467	12.5704	0.986747	1	5999.65	6023.89	5646.6	5706.24	5426.71	6299.06	5951.37	4101	7600.66	8010.53	5313.26	6062.27
ENSMMUG00000024709	0.00432537	13.9756	0.989386	1	16053	16022	17729.1	13891	14996.1	15281.1	12426.5	17363.8	13854.4	12474.1	25097.3	17262.1
ENSMMUG00000034006	0.402113	6.39464	1	1	20.62	14.56	0	0	24.23	29.16	47.61	43.63	0	0	31.25	0
ENSMMUG00000025943	-0.0899265	6.99684	1	1	55.81	64.81	60.72	57.64	24.23	58.32	0	130.88	72.16	39.85	125.02	34.25
ENSMMUG00000026577	-0.742707	6.27833	1	1	9.52	14.8	30.36	0	0	0	47.61	43.63	0	0	0	0
ENSMMUG00000025207	-0.742735	6.28117	1	1	11.53	15.58	0	57.64	0	0	0	43.63	0	0	0	34.25
ENSMMUG00000025698	-0.749427	6.27317	1	1	6.25	13.7	0	0	0	0	0	0	0	0	31.25	68.5
ENSMMUG00000027809	0.640712	6.27186	1	1	14.37	6.07	30.36	0	24.23	0	47.61	0	0	0	0	0
ENSMMUG00000028150	0.623241	6.27133	1	1	11.06	8.73	0	0	0	0	0	43.63	24.05	0	31.25	0
ENSMMUG00000025345	0.633091	6.26727	1	1	11.1	5.83	0	0	24.23	29.16	0	0	0	0	31.25	0
ENSMMUG00000034409	0.273579	6.50795	1	1	27.47	23.55	0	57.64	48.45	0	0	43.63	0	39.85	31.25	34.25
ENSMMUG00000028489	-0.537402	6.39834	1	1	14.33	23.52	30.36	0	0	0	47.61	87.26	24.05	0	0	0
ENSMMUG00000025613	-0.514894	6.38966	1	1	14.33	17.5	0	0	0	87.49	47.61	0	24.05	0	0	0
ENSMMUG00000033195	-0.748738	6.2729	1	1	6.25	13.8	0	0	0	29.16	0	0	0	39.85	31.25	0
ENSMMUG00000034447	0.647929	6.27496	1	1	15.77	6.07	30.36	0	0	0	47.61	0	0	0	31.25	0
ENSMMUG00000034369	-0.537496	6.40115	1	1	16.34	24.3	0	57.64	0	0	0	87.26	24.05	0	0	34.25
ENSMMUG00000026681	-0.411085	6.49599	1	1	17.31	23.57	30.36	0	0	87.49	0	0	24.05	0	62.51	0
ENSMMUG00000034845	-0.0955711	6.45042	1	1	15.91	25.42	0	0	24.23	0	0	87.26	24.05	39.85	31.25	0
ENSMMUG00000034977	-0.759196	6.271	1	1	4.81	14.8	30.36	0	0	0	0	43.63	24.05	0	0	0
ENSMMUG00000027580	-0.754781	6.27554	1	1	6.25	15.58	0	0	0	0	0	43.63	0	0	31.25	34.25
ENSMMUG00000024438	-0.308267	6.72495	1	1	39.8	48.97	0	57.64	0	0	47.61	130.88	0	79.71	93.76	34.25
ENSMMUG00000023917	-0.0786214	6.75047	1	1	37.93	42.2	30.36	0	24.23	0	47.61	43.63	24.05	0	93.76	137
ENSMMUG00000036043	-0.550005	6.38945	1	1	9.69	21.67	0	0	48.45	0	0	0	0	39.85	0	68.5
ENSMMUG00000027431	-0.540315	6.39192	1	1	11.06	21.65	30.36	0	0	0	0	43.63	24.05	0	31.25	34.25
ENSMMUG00000034792	0.631748	6.26764	1	1	11.06	6.07	30.36	0	0	0	0	0	24.05	0	31.25	0
ENSMMUG00000028503	-0.374762	6.61426	1	1	25.43	40.22	30.36	0	24.23	0	47.61	130.88	24.05	39.85	31.25	0
ENSMMUG00000024125	-0.0324033	8.10754	1	1	214.03	215.94	212.51	403.47	145.36	145.81	47.61	305.39	192.42	278.97	281.29	137
ENSMMUG00000033798	-0.0287888	8.19549	1	1	232.58	237.85	212.51	172.92	96.91	29.16	380.89	479.9	168.37	159.41	343.8	308.25
ENSMMUG00000025503	0.00741281	9.45405	1	1	603.2	623.93	910.74	288.19	823.7	758.22	285.67	436.28	962.11	637.65	656.34	376.75
ENSMMUG00000032839	-0.742284	6.27004	1	1	6.25	11.9	30.36	0	0	29.16	0	0	0	0	31.25	0
ENSMMUG00000025918	0.435361	6.64157	1	1	33.71	24.59	30.36	0	96.91	58.32	47.61	0	24.05	0	0	34.25
ENSMMUG00000036278	-0.349959	6.62397	1	1	34.12	39.88	0	115.28	0	0	0	130.88	24.05	0	31.25	68.5
ENSMMUG00000035758	0.148955	7.46611	1	1	109.2	105.25	60.72	115.28	96.91	87.49	47.61	87.26	192.42	119.56	93.76	171.25
ENSMMUG00000025279	-0.0908674	6.65355	1	1	30.87	36.44	60.72	57.64	72.68	0	0	87.26	24.05	0	0	34.25
ENSMMUG00000033865	-0.0155634	9.19307	1	1	512.21	523.72	637.52	518.75	629.89	437.44	380.89	654.41	312.69	478.24	718.85	411
ENSMMUG00000025353	0.0149809	9.55958	1	1	694.25	678.23	971.46	576.39	411.85	466.6	809.39	305.39	673.48	757.21	1000.14	890.5
ENSMMUG00000024994	-0.733278	6.27416	1	1	9.52	11.9	30.36	0	0	29.16	47.61	0	0	0	0	0
ENSMMUG00000026254	-0.733278	6.27416	1	1	9.52	11.9	30.36	0	0	29.16	47.61	0	0	0	0	0
ENSMMUG00000028188	0.632403	6.2737	1	1	12.5	7.97	0	0	0	0	0	0	0	39.85	62.51	0
ENSMMUG00000036136	-0.533177	6.38265	1	1	9.69	17.5	0	0	48.45	87.49	0	0	0	0	0	0
ENSMMUG00000024186	-0.221816	6.97517	1	1	60.99	66.17	91.07	115.28	24.23	29.16	47.61	130.88	24.05	79.71	93.76	0
ENSMMUG00000033822	0.393261	6.64058	1	1	28.93	28.52	0	0	48.45	0	0	0	96.21	39.85	0	102.75
ENSMMUG00000027715	0.190391	6.61482	1	1	33.55	33.39	0	0	48.45	0	95.22	87.26	24.05	79.71	0	0
ENSMMUG00000034623	-0.0902054	7.26462	1	1	80.4	88.9	91.07	115.28	72.68	87.49	0	43.63	120.26	119.56	93.76	102.75
ENSMMUG00000033277	-0.531263	6.38791	1	1	11.1	18.75	30.36	0	24.23	29.16	0	0	0	0	31.25	34.25
ENSMMUG00000036772	-0.528045	6.39423	1	1	14.33	20.63	30.36	0	0	29.16	47.61	43.63	24.05	0	0	0
ENSMMUG00000024009	0.208728	6.71081	1	1	49.75	30.9	91.07	57.64	24.23	29.16	142.83	0	24.05	0	0	34.25
ENSMMUG00000024942	-0.112399	6.74864	1	1	35.62	46.83	0	57.64	24.23	29.16	0	130.88	96.21	39.85	0	34.25
ENSMMUG00000037231	-0.0931796	6.44295	1	1	14.5	22.01	30.36	0	48.45	0	0	0	24.05	79.71	0	0
ENSMMUG00000035867	-0.0756522	6.82403	1	1	39.47	43.88	0	0	24.23	116.65	0	0	48.11	0	125.02	102.75
ENSMMUG00000025468	-0.762297	6.27233	1	1	4.81	15.58	0	0	0	0	0	43.63	24.05	0	0	34.25
ENSMMUG00000028483	-0.756019	6.2698	1	1	4.85	13.8	0	0	24.23	29.16	0	0	0	39.85	0	0
ENSMMUG00000027932	-0.753931	6.26864	1	1	4.81	12.92	30.36	0	0	0	0	0	24.05	0	0	34.25
ENSMMUG00000027653	-0.750913	6.26731	1	1	4.81	12.14	60.72	0	0	0	0	0	24.05	0	0	0
ENSMMUG00000027387	-0.749843	6.27336	1	1	6.25	14.04	30.36	0	0	0	0	0	0	39.85	31.25	0
ENSMMUG00000026223	-0.749328	6.2812	1	1	9.52	16.7	0	0	0	0	47.61	43.63	0	39.85	0	0
ENSMMUG00000025627	-0.740555	6.26958	1	1	6.25	11.66	0	0	0	58.32	0	0	0	0	31.25	0
ENSMMUG00000036951	-0.739761	6.27703	1	1	9.52	13.8	0	0	0	29.16	47.61	0	0	39.85	0	0
ENSMMUG00000027891	-0.738453	6.27936	1	1	11.53	14.56	0	57.64	0	29.16	0	43.63	0	0	0	0
ENSMMUG00000025597	-0.72742	6.27519	1	1	11.53	11.66	0	57.64	0	58.32	0	0	0	0	0	0
ENSMMUG00000024064	0.644906	6.27288	1	1	16.37	5.83	0	57.64	24.23	29.16	0	0	0	0	0	0
ENSMMUG00000027582	0.641836	6.27139	1	1	14.37	5.83	0	0	24.23	29.16	47.61	0	0	0	0	0
ENSMMUG00000034238	0.628617	6.26897	1	1	11.06	6.85	0	0	0	0	0	0	24.05	0	31.25	34.25
ENSMMUG00000035313	-0.534747	6.38292	1	1	9.62	17.74	30.36	0	0	58.32	0	0	48.11	0	0	0
ENSMMUG00000037359	-0.519199	6.39653	1	1	15.77	19.87	30.36	0	0	29.16	47.61	0	0	39.85	31.25	0
ENSMMUG00000027364	-0.429623	6.50561	1	1	19.18	29.38	0	0	24.23	29.16	47.61	43.63	24.05	39.85	0	34.25
ENSMMUG00000025278	0.4219	6.39702	1	1	25.9	12.14	60.72	57.64	24.23	0	47.61	0	0	0	0	0
ENSMMUG00000026047	-0.420971	6.50164	1	1	19.21	26.49	0	0	48.45	58.32	47.61	0	0	39.85	0	34.25
ENSMMUG00000033244	-0.418674	6.5006	1	1	19.21	25.6	30.36	0	48.45	29.16	47.61	0	0	0	0	68.5
ENSMMUG00000027935	0.409805	6.3937	1	1	22.59	12.68	0	57.64	0	29.16	0	0	24.05	0	31.25	34.25
ENSMMUG00000027519	0.406617	6.39556	1	1	22.62	13.7	0	57.64	24.23	0	0	0	0	0	31.25	68.5
ENSMMUG00000024466	-0.396608	6.51766	1	1	29.31	28.5	30.36	115.28	0	0	0	43.63	0	0	31.25	68.5
ENSMMUG00000025417	0.392173	6.39867	1	1	20.58	17.45	0	0	0	0	47.61	87.26	24.05	0	31.25	0
ENSMMUG00000035434	0.390549	6.39318	1	1	19.14	15.58	0	0	0	0	47.61	43.63	48.11	0	0	34.25
ENSMMUG00000026541	0.387992	6.39386	1	1	19.14	15.94	0	0	0	0	47.61	0	48.11	79.71	0	0
ENSMMUG00000028327	0.299457	6.50376	1	1	30.71	17.98	60.72	57.64	24.23	29.16	47.61	0	24.05	0	0	0
ENSMMUG00000032915	-0.240371	6.88111	1	1	50.02	53.35	60.72	115.28	24.23	29.16	0	0	48.11	39.85	62.51	137
ENSMMUG00000035848	0.235281	6.90223	1	1	47.69	47.35	60.72	0	48.45	58.32	0	43.63	96.21	39.85	93.76	34.25
ENSMMUG00000028180	0.22146	6.6086	1	1	37.52	26.94	91.07	115.28	24.23	0	0	43.63	48.11	0	0	0
ENSMMUG00000035975	-0.19135	7.05875	1	1	73.78	72.67	60.72	115.28	24.23	29.16	142.83	130.88	24.05	39.85	62.51	102.75
ENSMMUG00000027705	0.160074	6.59842	1	1	24.09	31.52	0	0	24.23	0	0	43.63	96.21	79.71	0	34.25
ENSMMUG00000028374	0.126249	7.218	1	1	86.34	83.79	30.36	57.64	48.45	58.32	142.83	261.77	120.26	0	62.51	68.5
ENSMMUG00000026634	-0.102397	8.60322	1	1	325.53	322.79	333.94	403.47	290.72	466.6	428.5	174.51	192.42	159.41	312.54	479.5
ENSMMUG00000034414	0.10175	6.87767	1	1	52.83	48.13	30.36	57.64	24.23	58.32	47.61	43.63	72.16	39.85	62.51	68.5
ENSMMUG00000024896	-0.0966612	6.64671	1	1	25.53	35.45	30.36	0	24.23	29.16	0	43.63	72.16	39.85	31.25	34.25
ENSMMUG00000027385	-0.094433	6.54519	1	1	19.35	27.48	30.36	0	72.68	29.16	0	43.63	24.05	0	0	34.25
ENSMMUG00000024318	-0.0916429	7.62819	1	1	146.09	145.73	0	403.47	121.13	58.32	95.22	305.39	48.11	159.41	62.51	205.5
ENSMMUG00000034621	-0.0911062	7.26105	1	1	80.82	87.24	151.79	115.28	96.91	58.32	47.61	43.63	144.32	79.71	0	102.75
ENSMMUG00000025201	0.0886529	7.91895	1	1	164.43	173.86	60.72	57.64	96.91	145.81	95.22	218.14	384.84	239.12	187.53	205.5
ENSMMUG00000027726	0.0879534	6.89262	1	1	58.14	55.77	60.72	115.28	48.45	0	47.61	218.14	48.11	0	31.25	0
ENSMMUG00000027721	-0.0858295	6.45356	1	1	19.14	24.67	0	0	0	0	47.61	43.63	48.11	79.71	0	0
ENSMMUG00000033012	-0.0857573	7.2141	1	1	82.76	86.45	91.07	172.92	121.13	58.32	47.61	174.51	72.16	39.85	0	68.5
ENSMMUG00000033778	-0.081606	6.33599	1	1	11.1	17.45	0	0	24.23	0	0	87.26	0	0	31.25	0
ENSMMUG00000033085	-0.0803538	6.83027	1	1	43.34	46.15	30.36	57.64	48.45	29.16	0	0	48.11	0	62.51	171.25
ENSMMUG00000025250	-0.0789296	6.55456	1	1	25.99	28.36	0	57.64	24.23	58.32	0	43.63	48.11	39.85	0	0
ENSMMUG00000025590	-0.0788118	7.06976	1	1	65.79	68.49	121.43	57.64	72.68	29.16	95.22	43.63	72.16	79.71	31.25	68.5
ENSMMUG00000028316	-0.0762783	6.32795	1	1	9.69	13.8	0	0	48.45	29.16	0	0	0	39.85	0	0
ENSMMUG00000035606	-0.0740553	7.33322	1	1	90.79	95.66	30.36	57.64	72.68	145.81	95.22	130.88	72.16	0	156.27	171.25
ENSMMUG00000027434	-0.0734619	7.29019	1	1	94.99	95.57	60.72	115.28	121.13	58.32	190.44	130.88	48.11	159.41	0	68.5
ENSMMUG00000033713	-0.0713948	7.72031	1	1	147.26	150.01	151.79	172.92	24.23	87.49	190.44	174.51	192.42	199.27	156.27	137
ENSMMUG00000026211	-0.0700271	6.32494	1	1	9.62	11.9	30.36	0	0	29.16	0	0	48.11	0	0	0
ENSMMUG00000027617	-0.0700271	6.32494	1	1	9.62	11.9	30.36	0	0	29.16	0	0	48.11	0	0	0
ENSMMUG00000025942	-0.0698791	6.33129	1	1	11.1	13.7	0	0	24.23	0	0	0	0	0	31.25	68.5
ENSMMUG00000035086	-0.0697749	6.33917	1	1	14.33	16.7	0	0	0	0	47.61	43.63	24.05	39.85	0	0
ENSMMUG00000025959	-0.0695692	6.32513	1	1	9.69	11.9	30.36	0	48.45	29.16	0	0	0	0	0	0
ENSMMUG00000025985	-0.0674623	7.80387	1	1	158.46	159.73	60.72	172.92	121.13	204.14	190.44	174.51	120.26	119.56	187.53	239.75
ENSMMUG00000025183	-0.0669458	6.44432	1	1	17.35	18.75	30.36	0	24.23	29.16	0	0	0	0	62.51	34.25
ENSMMUG00000033134	-0.0668771	6.73954	1	1	36.53	36.73	91.07	0	48.45	58.32	47.61	0	24.05	0	62.51	34.25
ENSMMUG00000028484	-0.0656101	6.32941	1	1	11.06	12.68	0	0	0	29.16	0	0	24.05	0	31.25	34.25
ENSMMUG00000028533	-0.0653891	6.32951	1	1	11.1	12.68	0	0	24.23	29.16	0	0	0	0	31.25	34.25
ENSMMUG00000025084	-0.064187	6.20738	1	1	4.81	8.73	0	0	0	0	0	43.63	24.05	0	0	0
ENSMMUG00000027444	-0.064187	6.20738	1	1	4.81	8.73	0	0	0	0	0	43.63	24.05	0	0	0
ENSMMUG00000037436	-0.064187	6.20738	1	1	4.81	8.73	0	0	0	0	0	43.63	24.05	0	0	0
ENSMMUG00000037430	-0.0639515	6.20748	1	1	4.85	8.73	0	0	24.23	0	0	43.63	0	0	0	0
ENSMMUG00000036957	-0.0630472	6.33642	1	1	14.37	14.8	30.36	0	24.23	0	47.61	43.63	0	0	0	0
ENSMMUG00000026641	0.0624152	7.59833	1	1	123.87	122.7	121.43	0	121.13	174.97	190.44	174.51	120.26	39.85	187.53	102.75
ENSMMUG00000026317	-0.0622674	6.20654	1	1	4.81	7.97	0	0	0	0	0	0	24.05	39.85	0	0
ENSMMUG00000027372	-0.0622674	6.20654	1	1	4.81	7.97	0	0	0	0	0	0	24.05	39.85	0	0
ENSMMUG00000027510	-0.0620324	6.20664	1	1	4.85	7.97	0	0	24.23	0	0	0	0	39.85	0	0
ENSMMUG00000035555	-0.0620324	6.20664	1	1	4.85	7.97	0	0	24.23	0	0	0	0	39.85	0	0
ENSMMUG00000035907	-0.0609047	6.56389	1	1	30.14	28.5	30.36	0	24.23	0	95.22	43.63	0	0	31.25	68.5
ENSMMUG00000036855	-0.0606312	6.56023	1	1	30.74	27.24	0	57.64	48.45	58.32	47.61	43.63	0	0	0	34.25
ENSMMUG00000027619	-0.059368	6.34384	1	1	17.78	16.7	0	57.64	0	0	0	43.63	0	39.85	31.25	0
ENSMMUG00000026693	-0.0589723	6.34082	1	1	15.77	15.58	0	0	0	0	47.61	43.63	0	0	31.25	34.25
ENSMMUG00000027541	-0.0587044	6.20501	1	1	4.81	6.85	0	0	0	0	0	0	24.05	0	0	34.25
ENSMMUG00000035850	-0.0587044	6.20501	1	1	4.81	6.85	0	0	0	0	0	0	24.05	0	0	34.25
ENSMMUG00000035858	-0.0584701	6.2051	1	1	4.85	6.85	0	0	24.23	0	0	0	0	0	0	34.25
ENSMMUG00000037043	-0.0584701	6.2051	1	1	4.85	6.85	0	0	24.23	0	0	0	0	0	0	34.25
ENSMMUG00000027794	-0.0573752	6.33652	1	1	16.34	13.8	0	57.64	0	29.16	0	0	24.05	39.85	0	0
ENSMMUG00000026726	-0.0567906	6.3336	1	1	14.37	12.68	0	0	24.23	29.16	47.61	0	0	0	0	34.25
ENSMMUG00000025502	-0.0555163	6.20367	1	1	4.81	6.07	30.36	0	0	0	0	0	24.05	0	0	0
ENSMMUG00000028175	-0.0555163	6.20367	1	1	4.81	6.07	30.36	0	0	0	0	0	24.05	0	0	0
ENSMMUG00000033267	-0.0555163	6.20367	1	1	4.81	6.07	30.36	0	0	0	0	0	24.05	0	0	0
ENSMMUG00000035786	-0.0555163	6.20367	1	1	4.81	6.07	30.36	0	0	0	0	0	24.05	0	0	0
ENSMMUG00000025366	-0.0552823	6.20376	1	1	4.85	6.07	30.36	0	24.23	0	0	0	0	0	0	0
ENSMMUG00000033322	-0.0552823	6.20376	1	1	4.85	6.07	30.36	0	24.23	0	0	0	0	0	0	0
ENSMMUG00000024463	-0.0546178	6.20977	1	1	6.25	7.97	0	0	0	0	0	0	0	39.85	31.25	0
ENSMMUG00000027759	-0.0543772	6.2032	1	1	4.81	5.83	0	0	0	29.16	0	0	24.05	0	0	0
ENSMMUG00000028111	-0.0543772	6.2032	1	1	4.81	5.83	0	0	0	29.16	0	0	24.05	0	0	0
ENSMMUG00000024768	-0.0541433	6.20329	1	1	4.85	5.83	0	0	24.23	29.16	0	0	0	0	0	0
ENSMMUG00000028028	-0.0541433	6.20329	1	1	4.85	5.83	0	0	24.23	29.16	0	0	0	0	0	0
ENSMMUG00000025477	-0.0539951	6.33219	1	1	14.33	11.9	30.36	0	0	29.16	47.61	0	24.05	0	0	0
ENSMMUG00000026269	-0.0528599	6.34099	1	1	17.78	14.8	30.36	57.64	0	0	0	43.63	0	0	31.25	0
ENSMMUG00000028173	-0.051809	6.56271	1	1	32.11	26.94	91.07	57.64	0	0	47.61	43.63	24.05	0	31.25	0
ENSMMUG00000033307	-0.0510724	6.20823	1	1	6.25	6.85	0	0	0	0	0	0	0	0	31.25	34.25
ENSMMUG00000034089	-0.047395	6.21477	1	1	9.52	8.73	0	0	0	0	47.61	43.63	0	0	0	0
ENSMMUG00000027826	-0.0467524	6.20642	1	1	6.25	5.83	0	0	0	29.16	0	0	0	0	31.25	0
ENSMMUG00000028479	-0.0467524	6.20642	1	1	6.25	5.83	0	0	0	29.16	0	0	0	0	31.25	0
ENSMMUG00000024320	0.0459657	7.7141	1	1	146.96	145.33	30.36	115.28	145.36	233.3	190.44	349.02	96.21	79.71	187.53	34.25
ENSMMUG00000032746	-0.0454943	6.21392	1	1	9.52	7.97	0	0	0	0	47.61	0	0	39.85	0	0
ENSMMUG00000027556	-0.044221	6.21627	1	1	11.53	8.73	0	57.64	0	0	0	43.63	0	0	0	0
ENSMMUG00000037280	-0.044221	6.21627	1	1	11.53	8.73	0	57.64	0	0	0	43.63	0	0	0	0
ENSMMUG00000034229	-0.0423149	6.21543	1	1	11.53	7.97	0	57.64	0	0	0	0	0	39.85	0	0
ENSMMUG00000028485	-0.0419453	6.21238	1	1	9.52	6.85	0	0	0	0	47.61	0	0	0	0	34.25
ENSMMUG00000036994	-0.0419453	6.21238	1	1	9.52	6.85	0	0	0	0	47.61	0	0	0	0	34.25
ENSMMUG00000027993	-0.0387486	6.21104	1	1	9.52	6.07	30.36	0	0	0	47.61	0	0	0	0	0
ENSMMUG00000035208	-0.0387486	6.21104	1	1	9.52	6.07	30.36	0	0	0	47.61	0	0	0	0	0
ENSMMUG00000025751	-0.0376037	6.21057	1	1	9.52	5.83	0	0	0	29.16	47.61	0	0	0	0	0
ENSMMUG00000024938	-0.0355381	6.21254	1	1	11.53	6.07	30.36	57.64	0	0	0	0	0	0	0	0
ENSMMUG00000027530	-0.0355381	6.21254	1	1	11.53	6.07	30.36	57.64	0	0	0	0	0	0	0	0
ENSMMUG00000027822	-0.0343867	6.21207	1	1	11.53	5.83	0	57.64	0	29.16	0	0	0	0	0	0
ENSMMUG00000032884	-0.0340465	7.99532	1	1	193.76	182.25	242.86	172.92	121.13	320.79	333.28	130.88	216.47	79.71	125.02	137
ENSMMUG00000026741	0.0335927	7.74892	1	1	147.73	149.17	91.07	172.92	218.04	145.81	95.22	218.14	96.21	119.56	156.27	171.25
ENSMMUG00000033951	0.028972	8.36573	1	1	278.25	274.18	212.51	288.19	169.58	116.65	428.5	654.41	192.42	318.83	312.54	68.5
ENSMMUG00000023932	0.02018	9.34618	1	1	577.03	569.64	485.73	403.47	726.79	962.36	523.72	305.39	481.05	478.24	750.11	616.5
ENSMMUG00000026295	-0.00794872	8.30293	1	1	237.11	251.98	425.01	172.92	290.72	145.81	190.44	392.65	312.69	159.41	218.78	137
ENSMMUG00000028145	-0.00680183	7.59012	1	1	144.96	127.6	91.07	288.19	121.13	174.97	190.44	218.14	0	119.56	125.02	34.25
ENSMMUG00000024847	0.00590934	8.65392	1	1	359.49	345.93	151.79	576.39	193.81	145.81	428.5	479.9	192.42	438.39	406.31	513.75
ENSMMUG00000036785	0.004859	8.67301	1	1	331.31	335.4	516.09	345.83	605.66	349.95	190.44	218.14	264.58	318.83	250.04	274
ENSMMUG00000032962	0.00441097	9.73982	1	1	786.44	788.49	637.52	749.3	702.57	379.11	857	349.02	1154.53	1275.31	468.82	1301.5
ENSMMUG00000032726	0.00152974	8.05225	1	1	186.1	202.27	121.43	57.64	314.94	233.3	238.05	349.02	288.63	239.12	31.25	68.5
ENSMMUG00000027861	-0.000518437	11.9595	1	1	3940.71	3928.79	4189.42	5187.49	3900.45	2828.75	4618.26	6718.65	2934.43	2550.62	3062.94	3356.51
ENSMMUG00000027338	-0.000501654	7.99709	1	1	202.13	186.48	242.86	288.19	145.36	174.97	238.05	218.14	120.26	159.41	218.78	137

## Sheet: I. DE_smallRNA_Grp4_Grp3
DE_smallRNA_Group4_vs_Group3_1
names	logFC	logCPM	PValue	FDR	Group4	Group3	Group4:1	Group3:6	Group3:8	Group4:12	Group3:14	Group4:16	Group3:14	Group4:23	Group3:25	Group4:28
ENSMMUG00000024424	1.3616	10.8453	0.00010697	0.0625777	2481.55	964.66	1494.77	1155.68	1295.67	2799.85	447.54	1640.13	763.1	3582.55	1161.29	2890.46
ENSMMUG00000032962	1.42837	9.58821	0.000305432	0.0738984	971.87	359.2	626.84	251.23	207.31	1158.56	203.43	820.06	508.73	1465.59	625.31	788.31
ENSMMUG00000033304	1.22334	10.1084	0.000378966	0.0738984	1391.08	596.67	819.71	753.7	362.79	1858.52	528.91	859.11	593.52	1899.84	744.42	1518.22
ENSMMUG00000026180	1.07047	10.9216	0.000636828	0.0931361	2471.05	1191.7	1639.42	1356.67	1347.5	4175.64	935.76	1757.28	1187.04	2768.34	1131.51	2014.56
ENSMMUG00000025719	1.15399	9.68681	0.00128535	0.130114	1002.95	423.12	578.62	401.98	414.61	989.6	325.48	859.11	169.58	1302.75	803.97	1284.65
ENSMMUG00000024056	1.07922	12.111	0.00133451	0.130114	5840.24	2770.69	3905.68	3165.56	2643.17	11271.8	2970.03	3514.56	2543.66	6188.04	2531.02	4321.09
ENSMMUG00000035750	1.39123	8.60756	0.00179039	0.149626	437.14	165.67	337.53	150.74	207.31	337.91	122.06	429.56	169.58	379.97	178.66	700.72
ENSMMUG00000036232	1.00132	9.73224	0.00253049	0.158669	1002.45	500.23	771.49	502.47	518.27	1472.34	813.71	859.11	339.15	1004.2	327.54	905.09
ENSMMUG00000036597	0.78388	11.5592	0.00261296	0.158669	3690.31	2130.3	2989.54	1708.4	2124.9	4682.51	1830.84	2655.44	1950.14	4912.44	3037.22	3211.62
ENSMMUG00000025361	0.908077	12.2362	0.00271229	0.158669	6149.03	3259.67	4291.43	3215.8	3783.36	10016.7	3010.72	3787.91	2119.72	6459.45	4168.74	6189.67
ENSMMUG00000025160	0.744702	12.8428	0.00316165	0.168143	9059.61	5423.14	6702.35	5175.44	5182.68	13420	4475.39	6209.05	5850.42	10937.6	6431.77	8029.05
ENSMMUG00000032901	0.985512	9.3108	0.0063811	0.293587	711.33	367.71	385.75	401.98	414.61	989.6	325.48	624.81	339.15	651.37	357.32	905.09
ENSMMUG00000024826	-1.04156	8.83029	0.00652415	0.293587	259.08	531.25	241.09	653.21	725.58	217.23	406.85	390.51	423.94	271.41	446.65	175.18
ENSMMUG00000033208	0.680895	12.3905	0.00785964	0.328421	6473.34	4060.89	3519.94	4120.25	3472.4	7965.1	3458.25	5428.04	4578.59	7979.32	4674.94	7474.31
ENSMMUG00000026727	2.46832	7.25445	0.00842868	0.328719	116.76	20.73	48.22	0	103.65	193.09	0	117.15	0	108.56	0	116.79
ENSMMUG00000026177	-0.971575	12.7536	0.0114315	0.413657	4649.7	9118.79	6171.94	4672.97	6841.14	2220.57	14239.9	5662.34	13735.8	4668.17	6104.22	4525.46
ENSMMUG00000037192	0.616854	12.13	0.0123535	0.413657	5294.56	3476.35	4194.99	3366.55	3472.4	8640.92	3417.57	4217.47	3730.7	5156.7	3394.54	4262.69
ENSMMUG00000025985	-1.39159	7.69428	0.0127279	0.413657	73.14	215.54	48.22	200.99	259.13	72.41	244.11	78.1	254.37	108.56	119.11	58.39
ENSMMUG00000033222	-1.0526	8.41789	0.0170168	0.500884	173.58	361.93	192.87	401.98	362.79	193.09	488.22	0	169.58	189.98	387.1	291.97
ENSMMUG00000027733	-2.03962	6.97644	0.0186106	0.500884	22.28	96.29	48.22	100.49	103.65	24.14	162.74	39.05	84.79	0	29.78	0
ENSMMUG00000037345	0.81938	10.1984	0.0187997	0.500884	1370.45	779.02	1253.68	854.2	725.58	2051.62	569.59	585.76	763.1	1764.14	982.63	1197.06
ENSMMUG00000027425	-2.23595	6.83523	0.0188367	0.500884	10.86	91.61	0	0	51.83	0	122.06	0	254.37	54.28	29.78	0
ENSMMUG00000036590	0.96607	9.54944	0.0201086	0.509759	853.76	460	578.62	401.98	466.44	1641.29	366.17	546.71	678.31	597.09	387.1	905.09
ENSMMUG00000024994	3.43872	6.66088	0.0214265	0.509759	55.08	0	192.87	0	0	24.14	0	0	0	0	0	58.39
ENSMMUG00000026110	-0.748	10.2067	0.0217846	0.509759	843.02	1431.39	964.37	803.95	1088.36	868.92	1546.04	1015.32	2289.29	461.39	1429.28	905.09
ENSMMUG00000025228	0.73134	11.3235	0.0290098	0.65272	3060.98	1847.09	2218.04	1959.63	2073.07	5623.84	2034.27	1562.03	1441.41	3039.74	1727.05	2861.26
ENSMMUG00000026265	0.417694	13.1339	0.034468	0.721525	10185.6	7602.13	8872.17	8843.46	6996.62	11344.2	5492.52	9450.26	6613.52	11480.5	10064.5	9780.84
ENSMMUG00000036503	-0.757105	16.33	0.0348975	0.721525	61233.1	103519	73195.4	48488.3	92510.8	33574.1	122178	61700	180600	62369	73816.4	75327.1
ENSMMUG00000037416	-3.43351	6.55499	0.0357679	0.721525	0	47.05	0	50.25	0	0	40.69	0	84.79	0	59.55	0
ENSMMUG00000024693	-0.953247	8.14127	0.0394452	0.732167	145.47	293.01	144.65	251.23	207.31	144.82	284.8	156.2	423.94	135.7	297.77	145.98
ENSMMUG00000024242	1.06801	8.10906	0.0397352	0.732167	271.3	114.15	192.87	0	155.48	144.82	122.06	507.66	84.79	189.98	208.44	321.16
ENSMMUG00000032760	-0.656041	15.4254	0.0400502	0.732167	34146	53840.9	37803.2	30901.9	39129.2	28360.6	64364.2	43697.7	94878.5	27059.1	39930.6	33809.6
ENSMMUG00000027383	-0.661095	12.356	0.0433411	0.736857	4034.68	6351.12	5352.23	7788.28	6063.74	1689.57	5451.84	4920.38	6019.99	2605.49	6431.77	5605.74
ENSMMUG00000034442	-0.719661	11.172	0.0455241	0.736857	1713.19	2836.46	2314.48	3416.79	2384.03	748.24	1993.58	1405.82	4154.64	1411.31	2233.25	2686.08
ENSMMUG00000027480	-0.732307	12.3555	0.0457032	0.736857	3906.25	6472.99	4387.87	7687.78	6374.7	1182.7	5940.06	4725.13	6019.99	2958.32	6342.44	6277.26
ENSMMUG00000026085	0.930303	9.19495	0.0463312	0.736857	639.83	314.56	192.87	351.73	207.31	772.37	244.11	585.76	84.79	597.09	684.86	1051.08
ENSMMUG00000026611	0.679791	11.4325	0.0466046	0.736857	3275.26	2013.21	1784.08	2462.1	1502.98	4441.15	2156.32	2889.75	847.89	3582.55	3096.78	3678.76
ENSMMUG00000028145	-1.16992	7.68085	0.0498494	0.741703	83.79	196.72	48.22	150.74	103.65	24.14	122.06	117.15	339.15	54.28	267.99	175.18
ENSMMUG00000025560	0.739304	10.1973	0.0500058	0.741703	1346.24	803.61	1205.46	803.95	725.58	2582.62	976.45	1054.37	678.31	1275.61	833.75	613.13
ENSMMUG00000027479	0.415127	12.2616	0.0507147	0.741703	5508.61	4116.88	4436.08	3416.79	4560.76	6299.67	4922.93	4334.62	3306.76	5319.55	4377.17	7153.15
ENSMMUG00000037409	-1.31188	7.4277	0.0545534	0.778383	59.84	160.89	48.22	50.25	51.83	48.27	244.11	117.15	339.15	27.14	119.11	58.39
ENSMMUG00000027856	-0.669388	12.3744	0.0574052	0.785121	4070.94	6457.41	5159.36	7738.03	6996.62	1375.79	5858.69	4959.43	6274.36	2904.04	5419.36	5956.09
ENSMMUG00000028170	-0.676211	12.3819	0.061222	0.785121	4081.47	6514.8	5304.01	7838.52	5908.26	1303.38	5126.35	4607.98	7715.77	3148.3	5985.12	6043.68
ENSMMUG00000024323	-0.54449	12.7097	0.0646182	0.785121	5407.77	7890.22	5786.2	4622.72	11142.8	4127.37	10781.6	6248.1	8139.71	5183.84	4764.27	5693.33
ENSMMUG00000033134	1.37007	7.19187	0.0668667	0.785121	97.64	28.23	48.22	0	51.83	72.41	0	117.15	0	162.84	89.33	87.59
ENSMMUG00000025398	1.13672	7.72887	0.066881	0.785121	175.32	70.83	144.65	50.25	51.83	313.78	162.74	78.1	0	135.7	89.33	204.38
ENSMMUG00000025445	-3.14575	6.49434	0.0689433	0.785121	0	39.23	0	0	51.83	0	0	0	84.79	0	59.55	0
ENSMMUG00000028178	-0.904099	8.01442	0.0698181	0.785121	127.25	260.46	96.44	251.23	310.96	96.55	162.74	78.1	339.15	189.98	238.21	175.18
ENSMMUG00000026582	3.16436	6.5799	0.0701684	0.785121	32.38	0	0	0	0	24.14	0	0	0	108.56	0	29.2
ENSMMUG00000036730	-0.981281	8.53969	0.0701829	0.785121	210.42	431.07	192.87	150.74	466.44	24.14	447.54	234.3	763.1	162.84	327.54	437.95
ENSMMUG00000027728	-3.4393	6.55685	0.0702381	0.785121	0	44.24	0	150.74	0	0	40.69	0	0	0	29.78	0
ENSMMUG00000034621	-0.985629	7.95648	0.0710899	0.785121	119.79	246.54	144.65	100.49	362.79	96.55	366.17	78.1	254.37	162.84	148.88	116.79
ENSMMUG00000027471	-0.632023	12.6231	0.0725717	0.785121	4921.34	7596.19	7425.62	9295.69	7255.75	1689.57	6794.45	5193.74	6952.67	3582.55	7682.39	6715.2
ENSMMUG00000027930	-0.617139	12.4384	0.0747982	0.785121	4352.22	6650.12	6027.29	7587.29	7463.06	1424.06	5370.47	4998.48	6189.57	3501.13	6640.2	5810.11
ENSMMUG00000028374	-1.15164	7.64729	0.0749872	0.785121	79.03	204.99	48.22	100.49	414.61	24.14	81.37	39.05	339.15	108.56	89.33	175.18
ENSMMUG00000025611	1.04983	10.2122	0.0787316	0.785121	1439.55	672.09	626.84	803.95	207.31	2220.57	244.11	976.27	169.58	1709.85	1935.49	1664.2
ENSMMUG00000025348	-1.36907	8.83716	0.0793701	0.785121	222.13	596.29	96.44	351.73	1243.84	120.68	528.91	78.1	678.31	27.14	178.66	788.31
ENSMMUG00000025832	-0.373176	11.5608	0.0805057	0.785121	2570.56	3325.29	2652.01	2813.83	3213.26	3089.49	3621	1952.53	3137.18	3202.58	3841.19	1956.17
ENSMMUG00000036811	-1.79607	6.71735	0.0807889	0.785121	11.27	53.01	0	50.25	103.65	0	81.37	0	0	27.14	29.78	29.2
ENSMMUG00000026241	-1.79965	6.71892	0.081361	0.785121	11.27	57.37	0	50.25	0	0	122.06	0	84.79	27.14	29.78	29.2
ENSMMUG00000025345	-1.74511	6.87981	0.0818674	0.785121	20.5	84.11	48.22	150.74	0	0	40.69	0	169.58	54.28	59.55	0
ENSMMUG00000024102	-1.29036	7.51631	0.0858628	0.810157	71.31	153.99	144.65	251.23	155.48	48.27	244.11	78.1	0	27.14	119.11	58.39
ENSMMUG00000035871	0.547194	9.63003	0.090286	0.82933	840.66	565.69	771.49	401.98	881.06	1013.74	406.85	859.11	423.94	1004.2	714.64	554.73
ENSMMUG00000035511	-1.54058	7.44643	0.095279	0.82933	54.32	159.57	96.44	50.25	0	0	284.8	0	254.37	0	208.44	175.18
ENSMMUG00000033230	0.421425	11.4724	0.0959879	0.82933	3141.94	2336.63	2218.04	2311.36	2332.21	4585.97	2400.44	2303.99	1780.56	3039.74	2858.56	3561.98
ENSMMUG00000036337	-0.857443	10.5545	0.09638	0.82933	1050.19	1926.86	1301.89	452.22	2487.69	531.01	2074.95	1054.37	3815.49	787.08	803.97	1576.61
ENSMMUG00000023916	-1.32082	7.11543	0.0966249	0.82933	33.2	97.84	0	100.49	51.83	24.14	162.74	0	84.79	54.28	89.33	87.59
ENSMMUG00000024869	0.483136	13.3684	0.0974022	0.82933	12221	8722.43	12295.7	10752.9	6063.74	19599	8543.92	7536.78	6698.3	10666.2	11553.4	11007.1
ENSMMUG00000035551	0.7206	9.35852	0.0990952	0.82933	696.59	443.31	433.96	351.73	362.79	1110.29	406.85	507.66	678.31	379.97	416.87	1051.08
ENSMMUG00000026160	0.33374	12.9083	0.0996396	0.82933	8468.32	6722.99	7763.15	6079.88	7152.1	12213.1	6753.77	6560.51	6274.36	8739.26	7354.84	7065.56
ENSMMUG00000025201	0.843492	8.10438	0.102084	0.82933	248.16	141.53	192.87	100.49	207.31	265.5	81.37	273.35	169.58	217.12	148.88	291.97
ENSMMUG00000024729	-1.21127	7.3832	0.102355	0.82933	58.88	135.11	96.44	50.25	155.48	48.27	325.48	39.05	84.79	81.42	59.55	29.2
ENSMMUG00000024186	-1.26701	7.23204	0.106331	0.82933	49.03	132.43	96.44	100.49	155.48	24.14	122.06	39.05	254.37	27.14	29.78	58.39
ENSMMUG00000026639	-0.931006	7.62596	0.107566	0.82933	82.02	163.07	0	100.49	103.65	48.27	203.43	78.1	169.58	108.56	238.21	175.18
ENSMMUG00000034773	0.575992	12.0868	0.109152	0.82933	5077.18	3424.53	3809.25	3316.3	3938.84	10716.7	3214.14	2967.85	3645.91	4505.33	3007.45	3386.8
ENSMMUG00000027495	-0.623052	12.4553	0.110758	0.82933	4390.16	6744.7	5545.11	7135.07	7255.75	1158.56	5492.52	5467.09	6783.09	3094.02	7057.08	6686.01
ENSMMUG00000028451	-1.75285	6.88924	0.112013	0.82933	22.28	84.43	48.22	100.49	155.48	24.14	81.37	39.05	84.79	0	0	0
ENSMMUG00000033987	0.669227	9.78704	0.115241	0.82933	967.07	578.89	675.06	753.7	466.44	1134.42	691.65	820.06	0	1329.89	982.63	875.9
ENSMMUG00000027786	0.448294	9.65776	0.117957	0.82933	837.74	582.42	626.84	502.47	518.27	989.6	569.59	859.11	339.15	895.64	982.63	817.5
ENSMMUG00000035932	-1.64814	6.98613	0.119249	0.82933	23.36	76.51	0	100.49	51.83	0	81.37	0	0	0	148.88	116.79
ENSMMUG00000026455	0.538758	11.1289	0.119465	0.82933	2534.76	1789.32	2121.61	1658.15	2435.86	3668.77	854.39	2108.74	2628.45	2876.9	1369.73	1897.78
ENSMMUG00000034870	-0.959755	7.79784	0.119576	0.82933	109.61	190.99	96.44	150.74	103.65	48.27	203.43	234.3	169.58	81.42	327.54	87.59
ENSMMUG00000024003	-0.446632	12.6636	0.126926	0.82933	5431.39	7430.01	4098.56	9647.41	9380.65	7651.32	3905.79	6599.56	7546.19	4369.63	6669.98	4437.87
ENSMMUG00000035086	1.46372	6.8478	0.127221	0.82933	64.1	11.91	144.65	0	0	24.14	0	39.05	0	54.28	59.55	58.39
ENSMMUG00000027600	-0.489839	12.171	0.127913	0.82933	3801.85	5330.73	5207.58	5527.16	5545.47	1544.75	5451.84	3866.01	6019.99	2931.18	4109.18	5459.75
ENSMMUG00000035403	-0.659993	13.4585	0.128122	0.82933	8687.13	13701.2	12343.9	26027.9	9380.65	3813.59	11595.3	7614.88	7715.77	5210.98	13786.6	14452.3
ENSMMUG00000027377	-0.544781	12.4116	0.128279	0.82933	4400.05	6392.56	6220.16	7235.56	6892.96	1375.79	5492.52	5076.58	5850.42	3284.01	6491.32	6043.68
ENSMMUG00000023833	0.537034	10.0269	0.12968	0.82933	1120.3	797.41	964.37	401.98	984.71	1496.47	1017.13	663.86	1017.46	1221.32	565.76	1255.45
ENSMMUG00000026059	0.676977	9.65023	0.129928	0.82933	861.75	528.97	337.53	703.46	207.31	1520.61	854.39	624.81	254.37	949.92	625.31	875.9
ENSMMUG00000027769	-0.582528	12.4486	0.130611	0.82933	4447.8	6641.96	6413.04	7185.31	6789.31	1158.56	5940.06	5193.74	6952.67	3284.01	6342.44	6189.67
ENSMMUG00000037181	-0.905135	7.73222	0.132029	0.82933	93.73	187.9	96.44	150.74	103.65	144.82	162.74	0	254.37	81.42	267.99	145.98
ENSMMUG00000027752	-0.567715	12.4176	0.132248	0.82933	4373.39	6459.81	5834.42	8491.73	6271.04	1399.93	5329.78	4842.28	5596.05	2958.32	6610.43	6831.99
ENSMMUG00000028237	2.69422	6.48564	0.132613	0.82933	29.13	0	48.22	0	0	0	0	39.05	0	0	0	58.39
ENSMMUG00000024938	-2.80117	6.43638	0.133416	0.82933	0	33.23	0	0	0	0	81.37	0	84.79	0	0	0
ENSMMUG00000034323	0.567556	12.2207	0.134677	0.82933	5581.41	3722.92	4339.65	2612.84	3005.95	5479.02	2847.97	5076.58	1780.56	6296.61	8367.25	6715.2
ENSMMUG00000036486	-2.2272	6.62001	0.137287	0.830052	5.84	53.65	0	50.25	51.83	0	81.37	0	84.79	0	0	29.2
ENSMMUG00000026614	0.556473	8.99776	0.138038	0.830052	505.81	330.84	385.75	401.98	207.31	748.24	488.22	468.61	169.58	488.53	387.1	437.95
ENSMMUG00000025184	-1.5549	6.66215	0.139614	0.830052	11.27	47.32	0	0	0	0	122.06	0	84.79	27.14	29.78	29.2
ENSMMUG00000025173	-0.765122	9.59645	0.14047	0.830052	542.9	896.5	1301.89	1004.94	414.61	289.64	854.39	234.3	1017.46	217.12	1191.07	671.52
ENSMMUG00000036436	0.552719	14.3245	0.142905	0.830855	24312.1	16628.2	30811.5	13064.2	18035.7	22157.5	9357.63	21360.7	33661.1	30180.3	9022.34	17050.8
ENSMMUG00000024262	-0.888405	7.85363	0.143447	0.830855	112.56	202.03	144.65	50.25	310.96	168.96	122.06	78.1	169.58	54.28	357.32	116.79
ENSMMUG00000023953	0.688317	7.77552	0.147612	0.846599	186.07	92.79	385.75	100.49	51.83	120.68	162.74	117.15	0	189.98	148.88	116.79
ENSMMUG00000034628	-0.557533	13.9917	0.149788	0.85074	13153.4	19330	20637.4	25726.4	17621.1	3982.55	17372.6	14644	16872.9	8576.41	19057.1	17926.7
ENSMMUG00000036855	-1.88248	6.74399	0.153439	0.858667	11.68	43.87	0	0	0	0	40.69	0	0	0	178.66	58.39
ENSMMUG00000036758	-0.536841	8.95582	0.15412	0.858667	352.75	514.59	530.4	351.73	725.58	362.05	366.17	195.25	593.52	325.69	535.98	350.36
ENSMMUG00000026788	-0.262182	13.3896	0.159983	0.882925	9676.6	11681	8823.95	8742.97	12542.1	9220.2	10659.6	9840.76	15770.7	11534.7	10689.8	8963.34
ENSMMUG00000024743	0.439518	11.5498	0.163644	0.894687	3331.64	2489.02	2844.88	2261.11	3005.95	5479.02	2359.75	1796.33	2882.81	3881.1	1935.49	2656.89
ENSMMUG00000033176	0.552138	9.00721	0.171252	0.903165	506.23	325.2	241.09	401.98	103.65	603.42	325.48	507.66	169.58	624.23	625.31	554.73
ENSMMUG00000037214	0.510317	9.27829	0.172366	0.903165	621.96	420.57	482.18	301.48	518.27	1013.74	488.22	351.46	169.58	678.51	625.31	583.93
ENSMMUG00000035420	-1.12839	6.95091	0.172798	0.903165	27.77	70.88	0	150.74	51.83	24.14	122.06	0	0	27.14	29.78	87.59
ENSMMUG00000027697	-1.24402	6.88669	0.1735	0.903165	26.89	85.38	0	50.25	51.83	0	40.69	78.1	254.37	27.14	29.78	29.2
ENSMMUG00000026037	0.453733	10.6088	0.173649	0.903165	1697.38	1234.74	1494.77	1256.17	1658.46	1882.66	1423.99	820.06	763.1	1574.15	1071.96	2715.28
ENSMMUG00000025802	0.546946	10.1251	0.174458	0.903165	1202.24	860.72	723.27	803.95	777.4	2148.16	650.97	741.96	1356.62	1492.73	714.64	905.09
ENSMMUG00000027547	-0.479458	12.4117	0.181059	0.929118	4516.59	6272.88	5930.85	7185.31	5700.95	1520.61	6672.4	5662.34	5850.42	2958.32	5955.34	6510.83
ENSMMUG00000024706	-0.768942	8.61676	0.18499	0.931634	241.95	407.81	144.65	502.47	466.44	48.27	488.22	351.46	254.37	81.42	327.54	583.93
ENSMMUG00000025711	1.16922	7.14995	0.185737	0.931634	92.8	39.23	96.44	0	155.48	0	40.69	117.15	0	162.84	0	87.59
ENSMMUG00000024283	0.238099	11.8276	0.186327	0.931634	3861.25	3221.33	3471.72	3115.31	3057.78	3886	3539.62	3826.96	2374.08	4559.61	4019.85	3561.98
ENSMMUG00000034854	-0.921295	8.23015	0.191443	0.949104	163.31	312.9	241.09	753.7	51.83	48.27	122.06	39.05	339.15	108.56	297.77	379.56
ENSMMUG00000025353	-0.518889	9.62393	0.194046	0.953922	602.95	881.52	530.4	502.47	829.23	289.64	1098.5	976.27	1441.41	488.53	535.98	729.91
ENSMMUG00000027861	-0.474228	12.4719	0.198311	0.962454	4716.89	6543.74	5689.76	7386.3	6789.31	1568.88	4597.44	5310.89	7037.46	3365.43	6908.19	7649.49
ENSMMUG00000033170	1.42553	6.83753	0.199072	0.962454	55.21	14.09	0	0	0	48.27	40.69	117.15	0	81.42	29.78	29.2
ENSMMUG00000024846	0.325195	15.3496	0.206825	0.985492	46328.4	37001.2	36067.3	39745.3	45555.8	72144.5	39424.1	30381.4	32558.8	47414.5	27722.1	45634.2
ENSMMUG00000028123	-1.11629	6.97152	0.20922	0.985492	34.7	80.33	0	50.25	155.48	0	81.37	117.15	84.79	27.14	29.78	29.2
ENSMMUG00000028360	1.08963	7.09566	0.219715	0.985492	81.55	32.01	0	100.49	0	24.14	0	156.2	0	81.42	59.55	145.98
ENSMMUG00000028439	-0.848006	7.59392	0.225919	0.985492	87.44	187.13	48.22	100.49	310.96	0	40.69	78.1	423.94	135.7	59.55	175.18
ENSMMUG00000028533	1.61928	6.64674	0.231404	0.985492	38.38	8.14	48.22	0	0	48.27	40.69	39.05	0	27.14	0	29.2
ENSMMUG00000024487	-0.350293	10.2625	0.232869	0.985492	1021.49	1301.73	819.71	1859.14	1243.84	699.96	1261.25	1288.67	1102.25	868.5	1042.18	1430.63
ENSMMUG00000033587	0.380585	9.99142	0.233629	0.985492	1054.48	805.03	723.27	1055.19	932.88	675.83	813.71	1054.37	508.73	1329.89	714.64	1489.02
ENSMMUG00000024807	-2.18207	6.60038	0.235116	0.985492	5.43	38.6	0	0	103.65	0	0	0	0	27.14	89.33	0
ENSMMUG00000037231	-1.94806	6.55673	0.235259	0.985492	4.83	40.83	0	100.49	103.65	24.14	0	0	0	0	0	0
ENSMMUG00000032811	-0.437049	9.07251	0.236246	0.985492	400.16	574.3	337.53	552.72	518.27	217.23	366.17	546.71	1017.46	461.39	416.87	437.95
ENSMMUG00000024318	-0.950445	8.09401	0.236446	0.985492	141.12	247.14	289.31	351.73	155.48	48.27	162.74	78.1	0	27.14	565.76	262.77
ENSMMUG00000026536	-0.485445	9.98452	0.237411	0.985492	780.38	1069.79	819.71	1105.43	1295.67	1134.42	1383.3	468.61	254.37	515.67	1310.17	963.49
ENSMMUG00000033865	-0.452763	9.2403	0.237487	0.985492	460.48	620.79	482.18	301.48	673.75	241.37	650.97	585.76	763.1	379.97	714.64	613.13
ENSMMUG00000028536	-0.477693	11.7778	0.237667	0.985492	2889.76	4010.6	3037.75	3266.05	5700.95	651.69	4231.28	3631.71	3221.97	3419.71	3632.76	3707.96
ENSMMUG00000024815	-0.878742	7.08177	0.241325	0.985492	40.22	90.38	48.22	100.49	155.48	96.55	81.37	0	84.79	27.14	29.78	29.2
ENSMMUG00000024365	-0.504781	8.82697	0.242528	0.985492	309.01	436.72	192.87	452.22	414.61	362.05	203.43	195.25	339.15	298.55	774.19	496.34
ENSMMUG00000024535	-0.468299	8.54022	0.243817	0.985492	246.64	348.48	192.87	401.98	207.31	241.37	406.85	156.2	339.15	379.97	387.1	262.77
ENSMMUG00000035614	-1.22129	6.87009	0.247895	0.985492	24.32	69.65	0	100.49	51.83	24.14	81.37	39.05	84.79	0	29.78	58.39
ENSMMUG00000034680	-0.579972	9.25008	0.252156	0.985492	445.17	670.12	578.62	502.47	725.58	72.41	773.02	429.56	932.68	298.55	416.87	846.7
ENSMMUG00000026673	0.413348	9.77829	0.253762	0.985492	896.5	673.86	626.84	753.7	466.44	1593.02	488.22	781.01	678.31	868.5	982.63	613.13
ENSMMUG00000027331	-1.21238	6.86297	0.255591	0.985492	23.9	61.46	0	0	155.48	24.14	122.06	39.05	0	27.14	29.78	29.2
ENSMMUG00000033056	-0.67455	8.36765	0.256131	0.985492	207.57	360.57	289.31	150.74	103.65	120.68	203.43	156.2	1017.46	325.69	327.54	145.98
ENSMMUG00000034384	-0.546942	10.4419	0.256191	0.985492	1102.88	1594.16	2459.13	1356.67	881.06	362.05	1627.41	702.91	2289.29	705.65	1816.38	1284.65
ENSMMUG00000025597	2.67864	6.47787	0.257289	0.985492	25.74	0	48.22	0	0	24.14	0	0	0	27.14	0	29.2
ENSMMUG00000033267	2.67864	6.47787	0.257289	0.985492	25.74	0	48.22	0	0	24.14	0	0	0	27.14	0	29.2
ENSMMUG00000028518	-2.79557	6.43452	0.257438	0.985492	0	28.55	0	50.25	51.83	0	40.69	0	0	0	0	0
ENSMMUG00000025206	2.35333	6.42648	0.25752	0.985492	23.29	0	48.22	0	0	0	0	39.05	0	0	0	29.2
ENSMMUG00000027987	2.35114	6.4254	0.25753	0.985492	22.88	0	48.22	0	0	0	0	39.05	0	27.14	0	0
ENSMMUG00000028030	2.34172	6.42016	0.257967	0.985492	19.49	0	0	0	0	0	0	39.05	0	0	0	58.39
ENSMMUG00000026347	2.34638	6.42259	0.258004	0.985492	21.32	0	48.22	0	0	0	0	0	0	0	0	58.39
ENSMMUG00000025312	2.34768	6.42298	0.258227	0.985492	21.05	0	0	0	0	0	0	78.1	0	27.14	0	0
ENSMMUG00000037056	2.6721	6.47447	0.258704	0.985492	22.95	0	0	0	0	0	0	0	0	27.14	0	87.59
ENSMMUG00000028449	0.293654	11.2379	0.259936	0.985492	2557.84	2093.05	2362.7	2361.61	2384.03	3282.59	2441.12	1522.98	1610.98	2496.93	1667.5	3124.03
ENSMMUG00000035645	0.35015	9.64496	0.261113	0.985492	802.09	620.48	675.06	502.47	932.88	820.65	732.34	663.86	339.15	1004.2	595.53	846.7
ENSMMUG00000026474	-0.184478	16.3365	0.263355	0.987581	77413.5	87974.9	72423.9	82304.5	118735	86964.4	90280.8	78452.8	74529.2	73578	74024.9	75648.2
ENSMMUG00000035047	0.798992	7.48872	0.272571	1	124.82	68.7	48.22	150.74	51.83	120.68	81.37	117.15	0	162.84	59.55	175.18
ENSMMUG00000027324	0.212596	12.5422	0.275579	1	6309.66	5449.09	5062.92	5677.91	5338.16	5358.34	6428.28	5818.55	4917.74	6812.28	4883.38	8496.19
ENSMMUG00000026127	0.210462	12.3608	0.279328	1	5567.19	4776	5496.89	4471.98	4197.97	6275.53	4190.59	5076.58	4409.01	4505.33	6610.43	6481.63
ENSMMUG00000028134	-0.39807	12.2356	0.281878	1	4119.36	5403.23	5062.92	5627.66	6478.35	1424.06	5370.47	5193.74	4239.43	2551.21	5300.25	6364.85
ENSMMUG00000026062	0.289664	10.4999	0.282389	1	1509.78	1212.58	1398.33	1004.94	1554.8	1158.56	1668.1	1562.03	763.1	1357.03	1071.96	2072.95
ENSMMUG00000032720	0.688132	8.1352	0.286404	1	252.8	169.39	385.75	100.49	103.65	168.96	244.11	156.2	339.15	407.11	59.55	145.98
ENSMMUG00000035738	0.504417	7.96162	0.291227	1	196.78	127.93	144.65	50.25	103.65	313.78	162.74	156.2	84.79	135.7	238.21	233.57
ENSMMUG00000032815	0.270952	10.4501	0.291839	1	1433.4	1206.99	1157.24	904.45	1658.46	1665.43	1098.5	1640.13	1271.83	1302.75	1101.74	1401.43
ENSMMUG00000035863	-0.636729	8.56795	0.292028	1	258.72	419.16	385.75	100.49	310.96	72.41	488.22	351.46	1017.46	162.84	178.66	321.16
ENSMMUG00000032751	0.339567	10.7991	0.303082	1	1876.43	1512.51	1109.02	1155.68	1762.11	2848.13	1464.67	1562.03	1780.56	2578.35	1399.5	1284.65
ENSMMUG00000026204	0.355198	10.7735	0.303136	1	1850.96	1450.09	1253.68	1507.41	1554.8	3475.68	1830.84	1132.47	1017.46	1845.56	1339.95	1547.42
ENSMMUG00000025344	-0.956307	6.92435	0.305443	1	32.73	74.42	0	50.25	207.31	0	0	78.1	84.79	27.14	29.78	58.39
ENSMMUG00000026741	-0.617577	7.95328	0.305727	1	138.87	219.96	48.22	452.22	155.48	48.27	203.43	195.25	169.58	81.42	119.11	321.16
ENSMMUG00000033244	1.0988	6.7526	0.307246	1	45.83	16	48.22	50.25	0	0	0	39.05	0	54.28	29.78	87.59
ENSMMUG00000025419	1.26286	6.78859	0.307308	1	47.4	14.09	0	0	0	48.27	40.69	78.1	0	81.42	29.78	29.2
ENSMMUG00000027431	1.26101	6.79282	0.307647	1	48.22	16	0	50.25	0	48.27	0	78.1	0	27.14	29.78	87.59
ENSMMUG00000033542	1.08365	6.74459	0.3077	1	42.24	16	48.22	50.25	0	48.27	0	0	0	27.14	29.78	87.59
ENSMMUG00000024986	1.19967	6.96959	0.309434	1	65.79	28.87	48.22	0	0	24.14	0	0	84.79	81.42	59.55	175.18
ENSMMUG00000028180	-1.56215	6.67358	0.30995	1	13.65	51.73	0	0	51.83	0	122.06	39.05	84.79	0	0	29.2
ENSMMUG00000027338	-0.551236	8.37637	0.310049	1	217.3	321.25	289.31	351.73	103.65	96.55	284.8	156.2	508.73	135.7	357.32	408.75
ENSMMUG00000035848	1.10863	6.74143	0.310833	1	44.57	11.91	48.22	0	0	96.55	0	78.1	0	0	59.55	0
ENSMMUG00000027498	-1.09826	6.71336	0.313228	1	18.48	51.78	0	0	0	24.14	0	39.05	169.58	0	89.33	29.2
ENSMMUG00000033896	0.533544	7.85397	0.316616	1	185	113.2	144.65	150.74	0	168.96	122.06	273.35	84.79	162.84	208.44	175.18
ENSMMUG00000032726	0.490673	8.15332	0.316666	1	236.4	162.8	144.65	150.74	207.31	96.55	162.74	156.2	84.79	434.25	208.44	350.36
ENSMMUG00000024366	0.573	7.95034	0.317382	1	205.09	128.3	241.09	100.49	155.48	120.68	122.06	117.15	84.79	108.56	178.66	437.95
ENSMMUG00000025749	-0.366015	9.2623	0.321401	1	480.23	653.09	530.4	602.96	518.27	410.32	366.17	546.71	1271.83	271.41	506.2	642.32
ENSMMUG00000024400	1.18664	6.99675	0.322282	1	73.26	37.06	0	100.49	0	0	0	195.25	84.79	54.28	0	116.79
ENSMMUG00000024851	0.314841	10.3864	0.324484	1	1380.18	1105.03	964.37	1205.93	777.4	2099.89	1179.87	1171.52	932.68	1818.42	1429.28	846.7
ENSMMUG00000028399	-0.627297	8.11042	0.325134	1	171.46	284.42	144.65	150.74	466.44	48.27	122.06	351.46	593.52	108.56	89.33	204.38
ENSMMUG00000024647	0.419772	9.90913	0.325421	1	1013.21	771.42	1350.11	552.72	259.13	1399.93	650.97	976.27	1441.41	814.22	952.85	525.54
ENSMMUG00000036516	-0.309254	9.3946	0.325648	1	538.5	678.58	482.18	502.47	725.58	579.28	691.65	741.96	847.89	597.09	625.31	291.97
ENSMMUG00000032834	0.849303	8.03519	0.332848	1	217.66	129.66	48.22	100.49	259.13	531.01	0	0	169.58	217.12	119.11	291.97
ENSMMUG00000024975	-0.693015	7.57169	0.333707	1	95	153.67	144.65	150.74	0	48.27	244.11	117.15	254.37	135.7	119.11	29.2
ENSMMUG00000036683	-0.354857	9.21945	0.336883	1	471.61	577.47	578.62	502.47	673.75	265.5	691.65	468.61	423.94	461.39	595.53	583.93
ENSMMUG00000036830	-0.380985	9.27097	0.337011	1	483.62	607.34	482.18	502.47	570.09	217.23	447.54	585.76	593.52	461.39	923.08	671.52
ENSMMUG00000027821	-0.515771	9.23049	0.339835	1	453.96	628.83	867.93	1055.19	518.27	120.68	406.85	390.51	508.73	189.98	655.09	700.72
ENSMMUG00000023907	0.35759	9.27435	0.341158	1	594.88	443.67	337.53	401.98	310.96	965.47	650.97	546.71	169.58	569.95	684.86	554.73
ENSMMUG00000025046	-0.55044	7.54993	0.341295	1	88.65	143.12	48.22	200.99	155.48	24.14	40.69	39.05	169.58	244.26	148.88	87.59
ENSMMUG00000036707	-0.249601	11.3817	0.34161	1	2378.08	2790.22	2025.17	3869.02	2902.3	2317.12	2522.49	2694.49	1441.41	2605.49	3215.88	2248.13
ENSMMUG00000024421	-0.590255	7.62694	0.344759	1	99.46	148.35	96.44	200.99	0	168.96	162.74	117.15	169.58	27.14	208.44	87.59
ENSMMUG00000027715	-0.782562	6.97833	0.349033	1	37.55	91.7	0	100.49	103.65	24.14	0	78.1	254.37	27.14	0	58.39
ENSMMUG00000033108	-0.139284	14.1424	0.350082	1	17140.4	18878.3	15815.6	15878	21145.3	20757.5	19488.3	16284.1	17720.8	18129.9	20158.8	14715.1
ENSMMUG00000034623	-0.731944	7.37507	0.351643	1	71.98	121.11	96.44	50.25	155.48	24.14	81.37	39.05	169.58	54.28	148.88	145.98
ENSMMUG00000026130	0.251078	9.93466	0.353903	1	980.85	806.65	1060.8	803.95	466.44	1013.74	1017.13	820.06	763.1	1221.32	982.63	788.31
ENSMMUG00000033012	-0.683209	7.11449	0.363612	1	45.84	85.66	0	150.74	51.83	48.27	81.37	39.05	84.79	54.28	59.55	87.59
ENSMMUG00000024011	-1.49481	6.81332	0.368898	1	23.29	52.69	48.22	0	103.65	0	40.69	39.05	0	0	119.11	29.2
ENSMMUG00000023917	-1.18749	6.84726	0.369229	1	21.93	54.29	0	100.49	51.83	24.14	0	0	0	27.14	119.11	58.39
ENSMMUG00000026432	-0.69582	7.48052	0.371225	1	79.39	121.39	48.22	150.74	155.48	72.41	122.06	78.1	0	81.42	178.66	116.79
ENSMMUG00000034149	0.396125	7.92015	0.373373	1	199.17	127.03	385.75	200.99	103.65	96.55	122.06	117.15	0	162.84	208.44	233.57
ENSMMUG00000024688	0.450494	8.00481	0.375406	1	199.39	135.75	48.22	100.49	155.48	217.23	244.11	195.25	0	244.26	178.66	291.97
ENSMMUG00000036757	-0.377726	9.3972	0.377502	1	538.92	728.82	578.62	602.96	362.79	289.64	854.39	781.01	1526.2	461.39	297.77	583.93
ENSMMUG00000024671	0.319775	10.1174	0.378685	1	1128.89	914.54	675.06	904.45	1451.15	1086.15	1057.82	820.06	593.52	1574.15	565.76	1489.02
ENSMMUG00000036297	-1.0293	6.81957	0.37954	1	23.36	61.2	0	150.74	0	0	40.69	0	84.79	0	29.78	116.79
ENSMMUG00000026254	1.39939	6.59996	0.3868	1	34.56	8.14	48.22	0	0	0	40.69	39.05	0	27.14	0	58.39
ENSMMUG00000035756	1.36136	6.58575	0.387488	1	26.35	10.05	0	50.25	0	48.27	0	0	0	54.28	0	29.2
ENSMMUG00000024750	-1.55062	6.50004	0.387633	1	9.64	32.96	48.22	50.25	0	0	0	0	84.79	0	29.78	0
ENSMMUG00000027435	1.12919	6.54764	0.387837	1	30.09	8.14	48.22	0	0	24.14	40.69	78.1	0	0	0	0
ENSMMUG00000033201	-0.925212	6.55232	0.387878	1	10.86	35.14	0	50.25	0	0	40.69	0	84.79	54.28	0	0
ENSMMUG00000035786	-0.925212	6.55232	0.387878	1	10.86	35.14	0	50.25	0	0	40.69	0	84.79	54.28	0	0
ENSMMUG00000035318	1.14241	6.54394	0.388104	1	30.55	5.96	96.44	0	0	0	0	0	0	27.14	29.78	29.2
ENSMMUG00000034238	-1.88979	6.54147	0.388242	1	5.84	28.18	0	0	0	0	81.37	0	0	0	59.55	29.2
ENSMMUG00000027891	1.12377	6.54424	0.388562	1	27.3	8.14	0	0	0	0	40.69	78.1	0	0	0	58.39
ENSMMUG00000027465	-1.56934	6.49547	0.38862	1	5.84	33.23	0	0	0	0	81.37	0	84.79	0	0	29.2
ENSMMUG00000025809	-0.5253	7.79769	0.389742	1	116.37	175.03	0	200.99	103.65	72.41	162.74	117.15	169.58	217.12	238.21	175.18
ENSMMUG00000024923	0.262753	9.91137	0.389925	1	983.48	774.61	1494.77	1004.94	414.61	868.92	1017.13	976.27	423.94	759.94	1012.41	817.5
ENSMMUG00000033822	-0.933804	6.55037	0.39282	1	10.67	31.1	0	0	155.48	24.14	0	0	0	0	0	29.2
ENSMMUG00000037184	-0.765932	7.07072	0.394542	1	47.2	104.84	48.22	0	103.65	24.14	81.37	78.1	339.15	27.14	0	58.39
ENSMMUG00000032852	0.930053	7.20795	0.400172	1	88.49	58.06	96.44	50.25	0	120.68	40.69	0	169.58	108.56	29.78	116.79
ENSMMUG00000027767	-0.748529	7.21509	0.40266	1	54.71	89.38	48.22	50.25	51.83	0	81.37	0	84.79	108.56	178.66	116.79
ENSMMUG00000023932	0.295812	9.29594	0.408013	1	604.64	488.18	771.49	351.73	570.09	868.92	325.48	312.41	508.73	515.67	684.86	554.73
ENSMMUG00000032848	-0.337146	12.5719	0.41035	1	5348.9	6815.32	6316.6	3818.77	5079.03	5165.24	4922.93	4647.03	16533.8	6323.75	3722.09	4291.89
ENSMMUG00000025382	-1.20524	6.88493	0.412053	1	31.1	71.88	48.22	100.49	103.65	0	40.69	78.1	84.79	0	29.78	29.2
ENSMMUG00000026185	0.705173	7.57054	0.415355	1	130.42	92.25	48.22	150.74	0	265.5	81.37	117.15	169.58	162.84	59.55	58.39
ENSMMUG00000024747	0.368585	10.5008	0.415539	1	1513.62	1149.77	723.27	1406.91	621.92	2124.03	854.39	1015.32	423.94	1574.15	2441.69	2131.35
ENSMMUG00000027955	0.596628	6.95179	0.416	1	65.06	34.82	144.65	0	103.65	48.27	40.69	78.1	0	54.28	29.78	0
ENSMMUG00000025918	0.633963	6.92962	0.417714	1	61.26	23.82	96.44	0	0	48.27	0	78.1	0	54.28	119.11	29.2
ENSMMUG00000028390	-0.424401	9.20864	0.419451	1	457.31	603.36	771.49	854.2	362.79	193.09	406.85	312.41	678.31	162.84	714.64	846.7
ENSMMUG00000033085	0.543693	7.25385	0.421589	1	100.86	49.88	241.09	100.49	0	72.41	0	78.1	0	54.28	148.88	58.39
ENSMMUG00000036639	0.596425	6.88972	0.422036	1	54.6	23.82	0	0	0	0	0	156.2	0	0	119.11	116.79
ENSMMUG00000024646	0.625309	7.31594	0.423328	1	100.08	63.38	48.22	50.25	51.83	24.14	40.69	117.15	84.79	135.7	89.33	175.18
ENSMMUG00000025132	-0.201539	10.8809	0.427726	1	1676.49	1956.14	1591.2	1658.15	1917.59	2220.57	1627.41	1132.47	2374.08	1248.47	2203.48	2189.74
tRNA-Arg-TCG-2-1	-0.826436	6.98379	0.428042	1	43.6	96.7	96.44	0	0	24.14	0	39.05	423.94	0	59.55	58.39
ENSMMUG00000025672	0.228125	10.536	0.433532	1	1512.85	1264.58	1060.8	1055.19	725.58	1544.75	1912.21	1562.03	932.68	1411.31	1697.27	1985.36
ENSMMUG00000024320	0.542513	8.13995	0.436208	1	247.85	153.12	433.96	200.99	207.31	48.27	0	156.2	0	162.84	357.32	437.95
ENSMMUG00000033035	0.176951	10.7716	0.444129	1	1781.84	1536.26	2073.39	2009.88	1140.19	1930.93	1871.53	1405.82	932.68	1601.29	1727.05	1897.78
ENSMMUG00000034081	-0.377644	8.35853	0.450364	1	230.38	283.24	289.31	301.48	207.31	241.37	325.48	312.41	254.37	162.84	327.54	145.98
ENSMMUG00000025590	-1.00473	7.03856	0.454992	1	40.81	72.74	48.22	100.49	51.83	0	122.06	39.05	0	0	89.33	116.79
ENSMMUG00000027726	-0.713106	6.9678	0.455169	1	41.41	72.15	96.44	50.25	103.65	0	122.06	0	84.79	81.42	0	29.2
ENSMMUG00000026025	-0.273619	9.60859	0.458844	1	652.95	770.24	675.06	703.46	1088.36	362.05	691.65	859.11	593.52	434.25	774.19	934.29
ENSMMUG00000024314	0.348555	8.58802	0.461266	1	336.75	251.45	96.44	200.99	103.65	434.46	366.17	468.61	169.58	217.12	416.87	467.14
ENSMMUG00000024902	0.196105	11.7714	0.464568	1	3625.96	3222.43	2844.88	2663.09	3161.43	3137.77	3173.46	2850.7	4493.8	5238.13	2620.35	4058.32
ENSMMUG00000027657	-0.826057	6.65951	0.468385	1	16.7	41.42	0	0	51.83	0	40.69	0	84.79	54.28	29.78	29.2
ENSMMUG00000032928	1.59166	6.64742	0.468813	1	34.57	16.96	0	0	0	48.27	0	39.05	84.79	27.14	0	58.39
ENSMMUG00000025102	0.20734	16.6444	0.470316	1	109699	95057.9	94363.2	72003.9	105312	182473	69571.9	76187.8	128709	110978	99692.4	84494.8
ENSMMUG00000035659	-0.201543	9.73819	0.471675	1	718.85	856.1	675.06	502.47	984.71	917.19	976.45	624.81	1102.25	705.65	714.64	671.52
ENSMMUG00000025111	0.260132	10.2574	0.472314	1	1229.49	1054.47	916.15	904.45	881.06	1424.06	854.39	585.76	1441.41	1411.31	1191.07	1810.19
ENSMMUG00000032912	-0.208054	11.6456	0.47589	1	2903.38	3382.41	3134.19	3467.04	5286.33	3910.14	2359.75	2343.04	3476.34	3202.58	2322.58	1926.97
ENSMMUG00000025523	-0.311818	12.7906	0.476973	1	6277	7808.81	6364.82	2964.57	7255.75	2896.4	12083.5	5857.6	12124.8	5346.69	4615.39	10919.5
ENSMMUG00000033951	-0.480595	8.40327	0.481479	1	225.07	287.41	289.31	251.23	207.31	217.23	650.97	195.25	0	189.98	327.54	233.57
ENSMMUG00000025857	-0.351868	8.4555	0.481966	1	244.11	315.24	192.87	251.23	414.61	289.64	447.54	312.41	254.37	162.84	208.44	262.77
ENSMMUG00000032918	0.711179	7.45589	0.490946	1	117.41	73.42	144.65	100.49	51.83	168.96	40.69	0	84.79	244.26	89.33	29.2
ENSMMUG00000026405	-0.179118	11.7451	0.498599	1	3141.03	3620.04	2314.48	2612.84	4353.45	3741.18	3295.51	3670.76	5426.47	3555.41	2411.91	2423.31
ENSMMUG00000036270	-0.324011	8.80636	0.499362	1	338.87	415.77	289.31	653.21	621.92	217.23	366.17	507.66	169.58	271.41	267.99	408.75
ENSMMUG00000026317	2.33323	6.4162	0.505017	1	18.07	0	0	0	0	24.14	0	39.05	0	27.14	0	0
ENSMMUG00000026505	-2.28856	6.35904	0.505129	1	0	14.09	0	0	0	0	40.69	0	0	0	29.78	0
ENSMMUG00000036495	-2.28856	6.35904	0.505129	1	0	14.09	0	0	0	0	40.69	0	0	0	29.78	0
ENSMMUG00000027630	1.88358	6.35323	0.50515	1	11.27	0	0	0	0	0	0	0	0	27.14	0	29.2
ENSMMUG00000027575	1.8937	6.35825	0.505167	1	13.65	0	0	0	0	0	0	39.05	0	0	0	29.2
ENSMMUG00000036206	1.8937	6.35825	0.505167	1	13.65	0	0	0	0	0	0	39.05	0	0	0	29.2
ENSMMUG00000036399	1.8937	6.35825	0.505167	1	13.65	0	0	0	0	0	0	39.05	0	0	0	29.2
ENSMMUG00000024133	-2.30607	6.36557	0.505174	1	0	18.19	0	50.25	0	0	40.69	0	0	0	0	0
ENSMMUG00000023991	1.8983	6.36069	0.505197	1	15.48	0	48.22	0	0	0	0	0	0	0	0	29.2
ENSMMUG00000028428	1.8983	6.36069	0.505197	1	15.48	0	48.22	0	0	0	0	0	0	0	0	29.2
ENSMMUG00000034676	1.8983	6.36069	0.505197	1	15.48	0	48.22	0	0	0	0	0	0	0	0	29.2
ENSMMUG00000023904	1.89597	6.3596	0.505198	1	15.07	0	48.22	0	0	0	0	0	0	27.14	0	0
ENSMMUG00000024552	0.2532	7.94482	0.509609	1	202.49	141.44	482.18	150.74	155.48	24.14	162.74	195.25	0	135.7	238.21	175.18
ENSMMUG00000027721	0.455565	7.16294	0.518867	1	86.33	57.69	144.65	0	51.83	72.41	122.06	156.2	84.79	0	29.78	58.39
ENSMMUG00000026093	-0.409721	7.19693	0.5232	1	59.85	99.52	0	50.25	103.65	96.55	0	117.15	254.37	27.14	89.33	58.39
ENSMMUG00000024168	-0.753545	6.76293	0.524969	1	24.92	47.05	0	50.25	0	0	40.69	39.05	84.79	27.14	59.55	58.39
ENSMMUG00000025983	-0.379587	7.93027	0.525771	1	144.99	193.81	144.65	251.23	207.31	144.82	366.17	39.05	84.79	162.84	59.55	233.57
ENSMMUG00000028350	0.605037	6.79791	0.526487	1	42.79	24.14	0	50.25	0	48.27	40.69	78.1	0	0	29.78	87.59
ENSMMUG00000035313	-0.963192	6.79671	0.526898	1	23.9	42.01	0	50.25	0	24.14	40.69	39.05	0	27.14	119.11	29.2
ENSMMUG00000025903	0.623662	6.81306	0.528742	1	49.58	26.69	48.22	0	103.65	24.14	0	117.15	0	0	29.78	58.39
ENSMMUG00000028010	-1.28813	6.76899	0.530642	1	25.13	51.14	96.44	0	51.83	0	0	0	84.79	0	119.11	29.2
ENSMMUG00000025257	-0.294327	9.13482	0.532719	1	448.86	530.32	337.53	452.22	466.44	193.09	773.02	781.01	423.94	407.11	535.98	525.54
ENSMMUG00000035865	0.615355	6.80715	0.532985	1	48.84	26.05	144.65	100.49	0	72.41	0	0	0	27.14	29.78	0
ENSMMUG00000024125	-0.371184	8.3012	0.533911	1	213.32	260.05	337.53	251.23	362.79	241.37	244.11	39.05	84.79	244.26	357.32	204.38
ENSMMUG00000024665	0.336077	8.09009	0.539829	1	215.82	172.16	144.65	50.25	103.65	193.09	244.11	234.3	254.37	244.26	208.44	262.77
ENSMMUG00000024462	-0.283679	9.9546	0.541647	1	850.89	994.39	1350.11	1507.41	673.75	337.91	976.45	1093.42	593.52	597.09	1220.84	875.9
ENSMMUG00000028067	-0.320806	9.15441	0.541673	1	459.95	568.26	867.93	653.21	207.31	217.23	244.11	390.51	932.68	298.55	803.97	525.54
ENSMMUG00000024709	-0.151247	13.9268	0.543122	1	14672.9	16343.9	11524.2	14672.1	15962.6	16002.6	18227	9840.76	19755.8	13136	13101.8	22860.9
ENSMMUG00000027366	0.370708	7.72621	0.55014	1	145.36	109.16	48.22	200.99	103.65	217.23	122.06	117.15	0	81.42	119.11	262.77
ENSMMUG00000033050	-0.130076	16.1222	0.5536	1	68065.1	74459.6	79078	58889.4	90437.8	76320.1	71972.4	61192.4	65032.9	80553.1	85965.3	43181.7
ENSMMUG00000025750	0.208636	9.80501	0.554722	1	876.03	726.78	867.93	803.95	518.27	965.47	488.22	859.11	423.94	461.39	1399.5	1226.25
ENSMMUG00000027463	-0.383687	8.15982	0.557719	1	193.89	234.27	289.31	200.99	103.65	144.82	284.8	195.25	254.37	135.7	327.54	204.38
ENSMMUG00000027434	0.532896	7.30128	0.558067	1	102.07	69.7	192.87	100.49	103.65	72.41	0	78.1	84.79	108.56	59.55	58.39
ENSMMUG00000026768	-0.332376	8.93555	0.559861	1	388.62	465.45	626.84	401.98	310.96	48.27	569.59	585.76	508.73	244.26	535.98	437.95
ENSMMUG00000025722	-0.204855	9.04483	0.560788	1	427.25	505.68	433.96	301.48	466.44	386.19	610.28	585.76	763.1	379.97	387.1	350.36
ENSMMUG00000035758	0.533989	7.3718	0.561379	1	104.66	64.33	48.22	150.74	51.83	120.68	0	156.2	0	81.42	119.11	116.79
ENSMMUG00000026641	0.352827	7.78624	0.574302	1	151.62	117.66	96.44	150.74	207.31	313.78	81.37	39.05	0	162.84	148.88	145.98
ENSMMUG00000026410	-0.465932	7.84826	0.578859	1	136.78	163.66	144.65	150.74	155.48	120.68	244.11	195.25	0	135.7	267.99	87.59
ENSMMUG00000023839	-0.293916	8.81421	0.581336	1	354.61	406.86	530.4	552.72	259.13	144.82	406.85	390.51	339.15	298.55	476.43	408.75
ENSMMUG00000032960	-0.322003	8.34411	0.598178	1	231.83	271.32	241.09	200.99	362.79	96.55	325.48	312.41	169.58	217.12	297.77	291.97
ENSMMUG00000024009	-0.526316	6.98386	0.60177	1	37.98	67.79	0	50.25	103.65	96.55	40.69	39.05	84.79	54.28	59.55	0
ENSMMUG00000026512	0.313381	6.99342	0.604291	1	63.28	40.73	96.44	0	51.83	0	122.06	78.1	0	54.28	29.78	87.59
ENSMMUG00000025057	0.315176	6.9938	0.605438	1	64.05	40.73	96.44	0	51.83	48.27	122.06	117.15	0	0	29.78	58.39
ENSMMUG00000035907	-1.03784	6.95687	0.606979	1	40.34	64.92	96.44	50.25	0	0	40.69	78.1	84.79	27.14	148.88	0
ENSMMUG00000035976	-0.466244	8.15538	0.607463	1	196.32	250.11	578.62	502.47	310.96	72.41	203.43	78.1	84.79	135.7	148.88	116.79
ENSMMUG00000026229	0.166309	14.3025	0.613911	1	21273.1	18948	18226.5	17435.7	21352.6	31667.3	12937.9	16010.8	15262	29366.1	27751.9	11094.7
ENSMMUG00000032883	-0.182325	8.05779	0.615981	1	174.08	221.86	144.65	251.23	207.31	241.37	162.74	117.15	339.15	162.84	148.88	204.38
ENSMMUG00000037073	-0.297812	8.22178	0.6211	1	189.54	230.54	48.22	251.23	207.31	434.46	162.74	156.2	84.79	162.84	446.65	145.98
ENSMMUG00000033863	0.192129	10.3245	0.627924	1	1264.23	1154.27	1012.58	1155.68	1088.36	1665.43	1261.25	702.91	1610.98	1655.57	655.09	1284.65
ENSMMUG00000028397	-1.54532	6.49339	0.632359	1	7.81	26.37	0	50.25	51.83	0	0	39.05	0	0	29.78	0
ENSMMUG00000024463	0.791475	6.48307	0.632369	1	22.28	5.96	48.22	0	0	24.14	0	39.05	0	0	29.78	0
ENSMMUG00000027918	1.11924	6.53316	0.632379	1	25.14	5.96	48.22	0	0	48.27	0	0	0	0	29.78	29.2
ENSMMUG00000027840	0.776449	6.48507	0.632408	1	20.91	8.14	48.22	0	0	0	40.69	0	0	27.14	0	29.2
ENSMMUG00000027582	-1.54152	6.47992	0.6327	1	4.83	21.96	0	50.25	0	24.14	0	0	0	0	59.55	0
ENSMMUG00000023834	0.786553	6.47966	0.632763	1	19.49	5.96	0	0	0	0	0	39.05	0	0	29.78	58.39
ENSMMUG00000027483	-0.900501	6.54013	0.632775	1	10.26	28.87	0	0	0	24.14	0	0	84.79	27.14	59.55	0
ENSMMUG00000024276	0.791223	6.48206	0.632798	1	21.32	5.96	48.22	0	0	0	0	0	0	0	29.78	58.39
ENSMMUG00000034229	0.791223	6.48206	0.632798	1	21.32	5.96	48.22	0	0	0	0	0	0	0	29.78	58.39
ENSMMUG00000034977	-1.52188	6.48905	0.632816	1	9.64	21.96	48.22	50.25	0	0	0	0	0	0	59.55	0
ENSMMUG00000036041	-1.09964	6.43175	0.632828	1	4.83	27.32	0	0	51.83	24.14	0	0	84.79	0	0	0
ENSMMUG00000024539	0.759274	6.48309	0.63283	1	19.3	10.37	48.22	0	51.83	48.27	0	0	0	0	0	0
ENSMMUG00000027372	-1.09458	6.43325	0.632831	1	5.43	27.01	0	50.25	0	0	0	0	84.79	27.14	0	0
ENSMMUG00000024402	-1.09219	6.43434	0.632839	1	5.84	27.01	0	50.25	0	0	0	0	84.79	0	0	29.2
ENSMMUG00000026223	1.11534	6.53049	0.632841	1	22.53	5.96	0	0	0	0	0	0	0	54.28	29.78	58.39
ENSMMUG00000025212	-1.07294	6.43832	0.632902	1	9.64	25.09	48.22	0	0	0	40.69	0	84.79	0	0	0
ENSMMUG00000034845	0.772825	6.48849	0.632915	1	21.32	10.05	48.22	50.25	0	0	0	0	0	0	0	58.39
ENSMMUG00000028450	-1.54571	6.4873	0.632945	1	5.84	28.87	0	0	0	0	0	0	84.79	0	59.55	29.2
ENSMMUG00000028453	-0.912211	6.54885	0.633008	1	11.27	28.24	0	100.49	0	0	40.69	0	0	27.14	0	29.2
ENSMMUG00000036136	-0.445438	6.48538	0.633051	1	9.65	25.09	0	0	0	48.27	40.69	0	84.79	0	0	0
ENSMMUG00000027323	-0.902246	6.54544	0.633093	1	11.27	26.69	0	0	103.65	0	0	0	0	27.14	29.78	29.2
ENSMMUG00000035606	-0.493318	7.06852	0.633322	1	49.42	66.83	48.22	100.49	103.65	24.14	40.69	39.05	0	135.7	89.33	0
ENSMMUG00000027317	1.09339	6.53578	0.633441	1	22.12	10.05	0	50.25	0	0	0	0	0	81.42	0	29.2
ENSMMUG00000027976	-0.268625	8.11117	0.637693	1	179.45	213.81	96.44	150.74	103.65	265.5	406.85	195.25	169.58	135.7	238.21	204.38
ENSMMUG00000036785	0.267608	8.93388	0.642061	1	439.56	377.9	385.75	552.72	518.27	651.69	122.06	273.35	339.15	624.23	357.32	262.77
ENSMMUG00000032774	-0.0904481	11.7761	0.642724	1	3316.11	3537.44	2844.88	3467.04	3938.84	4199.78	4271.96	2850.7	2882.81	3094.02	3126.55	3591.17
ENSMMUG00000026121	-0.249145	7.75628	0.655425	1	126.18	159.08	96.44	251.23	103.65	168.96	122.06	117.15	169.58	189.98	148.88	58.39
ENSMMUG00000026409	-0.257645	8.89596	0.656462	1	382.01	471.55	482.18	502.47	155.48	96.55	528.91	546.71	932.68	434.25	238.21	350.36
ENSMMUG00000033069	0.222727	9.58018	0.659912	1	719.77	629.86	433.96	854.2	362.79	1303.38	773.02	273.35	593.52	1004.2	565.76	583.93
ENSMMUG00000033033	0.136861	9.4338	0.664506	1	635.56	548.14	578.62	452.22	466.44	868.92	610.28	390.51	169.58	814.22	1042.18	525.54
ENSMMUG00000035915	-0.220675	8.44115	0.694669	1	256.05	298.74	241.09	301.48	466.44	289.64	203.43	390.51	254.37	271.41	267.99	87.59
ENSMMUG00000028083	0.667837	6.65309	0.696123	1	33.96	16	48.22	50.25	0	24.14	0	39.05	0	0	29.78	58.39
ENSMMUG00000026047	0.648162	6.63719	0.696485	1	26.76	14.09	0	0	0	48.27	40.69	0	0	27.14	29.78	58.39
ENSMMUG00000023878	-0.792035	6.65217	0.696495	1	18.67	30.1	0	50.25	0	0	40.69	39.05	0	54.28	59.55	0
ENSMMUG00000027510	-0.920828	6.55989	0.696543	1	13.24	37.37	0	50.25	51.83	0	0	39.05	84.79	27.14	0	0
ENSMMUG00000024466	0.406345	6.60771	0.696738	1	31.1	16.32	48.22	0	51.83	0	0	78.1	0	0	29.78	29.2
ENSMMUG00000025271	-1.21776	6.60067	0.697502	1	15.48	28.23	48.22	0	51.83	0	0	0	0	0	89.33	29.2
ENSMMUG00000036957	-1.20927	6.60446	0.69752	1	17.45	28.23	48.22	0	51.83	0	0	39.05	0	0	89.33	0
ENSMMUG00000025613	-0.793639	6.63602	0.698845	1	14.48	26	0	0	0	72.41	40.69	0	0	0	89.33	0
ENSMMUG00000023939	-0.662236	7.09305	0.698961	1	59.02	80.01	192.87	0	51.83	24.14	0	78.1	169.58	0	178.66	0
ENSMMUG00000035242	-0.297749	7.37589	0.701771	1	84.61	111.11	144.65	100.49	155.48	72.41	40.69	39.05	169.58	108.56	89.33	58.39
ENSMMUG00000024450	-0.133847	9.06088	0.703196	1	441.69	480.22	530.4	401.98	414.61	555.14	569.59	390.51	508.73	352.83	506.2	379.56
ENSMMUG00000023922	-0.0829353	10.781	0.712828	1	1629.22	1768.25	1542.99	1406.91	2280.38	1737.84	1261.25	1718.23	2374.08	2008.4	1518.61	1138.67
ENSMMUG00000024837	-0.285675	7.433	0.714984	1	92.2	110.75	96.44	50.25	103.65	24.14	81.37	117.15	169.58	135.7	148.88	87.59
ENSMMUG00000035737	0.296382	7.43839	0.717868	1	98.35	74.33	0	100.49	51.83	168.96	40.69	39.05	0	108.56	178.66	175.18
ENSMMUG00000032814	0.1272	10.8073	0.720011	1	1781.68	1624.67	1928.73	2462.1	1554.8	2148.16	1098.5	781.01	1102.25	2415.51	1905.71	1635.01
ENSMMUG00000036607	-0.381275	7.40516	0.721659	1	87.46	106.29	144.65	50.25	103.65	24.14	203.43	39.05	84.79	54.28	89.33	175.18
ENSMMUG00000033837	0.0848874	13.8614	0.721902	1	15237.7	14354.8	15478.1	15325.3	15185.2	22591.9	17006.5	10387.5	10768.2	12023.3	13488.8	15707.7
ENSMMUG00000034706	-0.249081	9.25093	0.726732	1	502.15	577.05	819.71	1205.93	414.61	96.55	325.48	507.66	254.37	298.55	684.86	788.31
ENSMMUG00000035506	0.606022	6.79857	0.736201	1	42.98	24.14	0	50.25	0	24.14	40.69	78.1	0	54.28	29.78	58.39
ENSMMUG00000034195	0.436784	6.76747	0.736602	1	46.18	24.14	96.44	50.25	0	0	40.69	78.1	0	27.14	29.78	29.2
ENSMMUG00000024746	-0.727413	6.75228	0.736923	1	24.92	36.05	0	50.25	0	0	40.69	39.05	0	27.14	89.33	58.39
ENSMMUG00000026102	-0.321373	7.55457	0.737747	1	103.42	129.25	48.22	50.25	155.48	48.27	122.06	195.25	169.58	108.56	148.88	116.79
ENSMMUG00000037326	-0.837596	6.67927	0.738005	1	22.28	52.1	48.22	50.25	0	24.14	40.69	39.05	169.58	0	0	0
ENSMMUG00000027444	-0.7593	6.75501	0.739479	1	22.35	40.73	0	0	51.83	24.14	122.06	0	0	0	29.78	87.59
ENSMMUG00000033610	0.0606691	15.3037	0.739496	1	41244.3	39480.4	45421.7	42659.7	39284.7	48900.9	41092.2	32607.3	27556.3	38621	46809	40670.8
ENSMMUG00000026596	-0.0824242	12.3595	0.744816	1	5045.1	5301.16	6123.73	4672.97	5545.47	6323.8	5492.52	3787.91	4154.64	3501.13	6640.2	5488.95
ENSMMUG00000033750	0.400612	7.54483	0.745067	1	124.01	112.34	144.65	0	51.83	144.82	81.37	78.1	339.15	135.7	89.33	116.79
ENSMMUG00000037310	-0.140055	10.2182	0.760324	1	1072.78	1146.83	1253.68	1658.15	1036.54	699.96	1220.56	1015.32	508.73	759.94	1310.17	1635.01
ENSMMUG00000027969	0.77617	6.85157	0.763992	1	51.61	31.05	48.22	0	0	48.27	40.69	78.1	84.79	54.28	29.78	29.2
ENSMMUG00000033778	-0.484216	6.82181	0.764103	1	35.38	51.46	96.44	50.25	51.83	24.14	40.69	0	84.79	27.14	29.78	29.2
ENSMMUG00000025148	0.289932	8.14562	0.764262	1	233.47	206.77	241.09	150.74	155.48	96.55	244.11	312.41	423.94	108.56	59.55	408.75
ENSMMUG00000033806	-0.18949	7.72187	0.76497	1	133.73	149.93	144.65	50.25	103.65	120.68	162.74	234.3	254.37	81.42	178.66	87.59
ENSMMUG00000034105	0.292584	6.84751	0.765983	1	48.21	26	48.22	0	0	0	40.69	78.1	0	27.14	89.33	87.59
ENSMMUG00000036882	0.279775	6.86468	0.766153	1	53.44	32.28	144.65	50.25	0	0	81.37	39.05	0	54.28	29.78	29.2
ENSMMUG00000024764	0.106033	9.7061	0.767171	1	784.02	711.15	530.4	1055.19	881.06	796.51	854.39	976.27	169.58	624.23	595.53	992.68
ENSMMUG00000025250	-0.697978	6.84444	0.768207	1	28.37	48.92	0	0	0	0	40.69	0	84.79	54.28	119.11	87.59
ENSMMUG00000026686	-0.144199	9.5397	0.773946	1	644.66	700.58	675.06	552.72	414.61	362.05	1057.82	702.91	763.1	461.39	714.64	1021.88
ENSMMUG00000024346	-0.232609	7.85342	0.775603	1	147.31	164.99	144.65	150.74	103.65	120.68	162.74	156.2	169.58	81.42	238.21	233.57
ENSMMUG00000026493	0.078503	10.3863	0.78095	1	1294.09	1187.89	964.37	1055.19	1347.5	1496.47	1708.78	1562.03	339.15	1221.32	1488.83	1226.25
ENSMMUG00000025425	0.30333	6.97945	0.786652	1	57.1	38.55	48.22	0	51.83	0	81.37	39.05	0	81.42	59.55	116.79
ENSMMUG00000032915	-0.479448	6.97678	0.786787	1	41.83	54.29	48.22	100.49	51.83	48.27	0	0	0	54.28	119.11	58.39
ENSMMUG00000027698	0.283521	6.98342	0.788636	1	55.26	42.96	0	0	103.65	0	81.37	78.1	0	81.42	29.78	116.79
ENSMMUG00000025943	0.329456	6.97076	0.789672	1	56.22	34.19	0	0	51.83	24.14	0	117.15	0	81.42	119.11	58.39
ENSMMUG00000028479	0.752928	6.87296	0.790226	1	55.42	44.28	48.22	0	51.83	24.14	0	117.15	169.58	0	0	87.59
ENSMMUG00000024976	-0.160511	7.98197	0.793707	1	169.43	184.12	192.87	50.25	259.13	144.82	203.43	117.15	169.58	217.12	238.21	175.18
ENSMMUG00000032884	0.0198276	8.04918	0.801887	1	198.86	172.17	241.09	200.99	207.31	168.96	244.11	273.35	0	135.7	208.44	175.18
ENSMMUG00000026541	-0.46976	7.06978	0.805975	1	51.2	64.65	0	100.49	103.65	24.14	0	117.15	0	27.14	119.11	87.59
ENSMMUG00000033155	-0.0984451	11.0197	0.812211	1	1944.53	2035.81	2169.82	1557.66	1088.36	1255.11	2319.06	2421.14	1610.98	1628.43	3602.98	2248.13
ENSMMUG00000025472	-0.311433	7.65746	0.813295	1	115.37	137.16	192.87	0	466.44	96.55	40.69	39.05	0	189.98	178.66	58.39
ENSMMUG00000025554	0.0643084	12.7803	0.814319	1	7090.5	6832.12	6268.38	7185.31	7359.41	9027.11	6957.19	4607.98	7715.77	9417.77	4942.93	6131.27
ENSMMUG00000034414	0.31198	7.09974	0.816379	1	67.16	50.51	48.22	100.49	51.83	48.27	40.69	39.05	0	54.28	59.55	145.98
ENSMMUG00000027468	0.238578	7.17799	0.817942	1	75.11	56.74	0	50.25	51.83	48.27	122.06	156.2	0	54.28	59.55	116.79
ENSMMUG00000026811	-0.617198	7.12161	0.818415	1	56.43	73.06	48.22	50.25	103.65	0	122.06	117.15	0	0	89.33	116.79
ENSMMUG00000027320	-0.123193	9.58417	0.819011	1	676.95	716.36	1012.58	552.72	518.27	313.78	854.39	468.61	763.1	597.09	893.3	992.68
ENSMMUG00000025862	-0.0945356	10.8818	0.8235	1	1769.83	1840.06	2700.23	1658.15	2176.73	1955.07	2522.49	1522.98	847.89	1357.03	1995.04	1313.84
ENSMMUG00000027952	0.0641729	7.16227	0.83497	1	70.78	52.05	96.44	0	51.83	72.41	0	39.05	0	0	208.44	145.98
ENSMMUG00000034390	-0.245676	8.07952	0.84122	1	183.81	206.41	289.31	401.98	103.65	48.27	203.43	39.05	84.79	162.84	238.21	379.56
ENSMMUG00000024536	-0.107448	8.30363	0.843659	1	225.76	260.41	96.44	251.23	259.13	337.91	244.11	312.41	339.15	352.83	208.44	29.2
ENSMMUG00000034836	-0.367071	7.28271	0.845855	1	76.52	93.57	96.44	200.99	207.31	0	0	117.15	0	81.42	59.55	87.59
ENSMMUG00000025533	-0.116086	8.56794	0.847132	1	292	318.11	289.31	401.98	207.31	386.19	284.8	273.35	339.15	189.98	357.32	321.16
ENSMMUG00000033673	-0.06632	8.60127	0.850994	1	303.46	331.93	241.09	301.48	207.31	337.91	284.8	312.41	508.73	217.12	357.32	408.75
ENSMMUG00000026648	0.0909784	8.37889	0.851781	1	273.37	243.04	337.53	200.99	362.79	120.68	447.54	351.46	84.79	352.83	119.11	204.38
ENSMMUG00000025503	-0.0747447	9.39846	0.852215	1	599.33	620.16	867.93	602.96	570.09	458.6	773.02	624.81	678.31	461.39	476.43	583.93
ENSMMUG00000034909	0.155325	7.42741	0.86248	1	105.15	87.25	48.22	150.74	155.48	120.68	40.69	273.35	0	54.28	89.33	29.2
ENSMMUG00000023942	-0.0530433	13.8024	0.865265	1	13957	14431.5	17840.8	15777.5	15081.6	18633.5	12734.5	9840.76	7630.98	11616.1	20933	11853.8
ENSMMUG00000033713	-0.173726	7.63287	0.870289	1	113.6	121.66	96.44	100.49	51.83	96.55	162.74	39.05	84.79	189.98	208.44	145.98
ENSMMUG00000037212	0.0510407	13.9494	0.875429	1	16012.9	15446	14320.8	13968.6	18865	21795.4	9561.06	13472.5	12294.4	22038.1	22541	8437.8
ENSMMUG00000032878	-0.0998798	9.07197	0.888214	1	450.09	478.4	337.53	351.73	518.27	362.05	447.54	663.86	508.73	624.23	565.76	262.77
ENSMMUG00000026456	0.0408302	13.1043	0.890845	1	8842.62	8614.58	8679.3	9747.91	8240.46	8375.42	8788.03	4842.28	8733.23	14900.2	7563.28	7415.92
ENSMMUG00000028261	-0.237892	7.95901	0.89598	1	170.4	180.72	289.31	251.23	207.31	120.68	122.06	156.2	84.79	81.42	238.21	204.38
ENSMMUG00000024353	0.0890498	9.21534	0.896549	1	525.98	503.72	482.18	301.48	570.09	627.55	691.65	351.46	508.73	759.94	446.65	408.75
ENSMMUG00000033622	0.0778018	7.78978	0.901336	1	157.59	135.89	289.31	200.99	155.48	24.14	0	78.1	84.79	162.84	238.21	233.57
ENSMMUG00000028064	0.0692375	9.36109	0.901659	1	602.92	571.11	771.49	552.72	881.06	531.01	406.85	624.81	508.73	678.51	506.2	408.75
ENSMMUG00000033596	-0.0903662	8.2289	0.913313	1	224.13	237.45	192.87	251.23	207.31	193.09	325.48	390.51	254.37	81.42	148.88	262.77
ENSMMUG00000033798	-0.181061	8.29503	0.926239	1	235.76	239.32	289.31	251.23	362.79	48.27	284.8	390.51	0	217.12	297.77	233.57
ENSMMUG00000026634	0.0294975	8.70602	0.933476	1	356.08	330.29	626.84	351.73	414.61	362.05	447.54	234.3	169.58	352.83	267.99	204.38
ENSMMUG00000025096	0.0175008	13.0198	0.940779	1	8260.65	8201.52	7859.59	8441.49	9587.96	10789.1	7160.62	7224.37	8224.5	7517.93	7593.06	7912.26
ENSMMUG00000026295	0.0632894	8.8887	0.941977	1	400.37	382.34	144.65	200.99	570.09	482.73	528.91	585.76	254.37	379.97	357.32	408.75
ENSMMUG00000032750	0.0240002	9.83391	0.946814	1	833.29	791.47	819.71	1004.94	362.79	1110.29	935.76	429.56	254.37	814.22	1399.5	992.68
ENSMMUG00000026039	0.0121412	10.1484	0.968466	1	1061.76	1031.59	916.15	753.7	1347.5	1279.24	1301.93	937.22	593.52	949.92	1161.29	1226.25
ENSMMUG00000024499	-0.000918369	12.7671	0.985521	1	6872.56	6921.69	5207.58	7587.29	6944.79	6034.16	7445.42	6755.76	7122.25	8277.87	5508.69	8087.44
ENSMMUG00000024873	-0.135705	6.97963	1	1	45.65	57.42	48.22	50.25	51.83	96.55	40.69	0	84.79	54.28	59.55	29.2
ENSMMUG00000032794	-1.05565	6.42752	1	1	7.81	16.32	0	0	51.83	0	0	39.05	0	0	29.78	0
ENSMMUG00000025357	-0.36046	6.36274	1	1	4.83	16.96	0	0	0	24.14	0	0	84.79	0	0	0
ENSMMUG00000027418	0.324067	6.42967	1	1	15.48	10.37	48.22	0	51.83	0	0	0	0	0	0	29.2
ENSMMUG00000035418	0.324067	6.42967	1	1	15.48	10.37	48.22	0	51.83	0	0	0	0	0	0	29.2
ENSMMUG00000034975	-1.066	6.42255	1	1	5.43	16.32	0	0	51.83	0	0	0	0	27.14	29.78	0
ENSMMUG00000028035	0.375932	6.59158	1	1	22.53	16	0	50.25	0	0	0	0	0	54.28	29.78	58.39
ENSMMUG00000027408	1.8773	6.3503	1	1	10.26	0	0	0	0	24.14	0	0	0	27.14	0	0
ENSMMUG00000036892	1.8773	6.3503	1	1	10.26	0	0	0	0	24.14	0	0	0	27.14	0	0
ENSMMUG00000025136	-1.05919	6.41987	1	1	5.43	14.09	0	0	0	0	40.69	0	0	27.14	29.78	0
ENSMMUG00000035191	0.324892	6.42935	1	1	15.48	10.05	48.22	50.25	0	0	0	0	0	0	0	29.2
ENSMMUG00000033248	0.135147	8.2686	1	1	238.57	227.77	192.87	150.74	310.96	241.37	244.11	195.25	254.37	271.41	178.66	291.97
ENSMMUG00000026044	-0.041708	7.61571	1	1	117.49	133.98	0	100.49	207.31	96.55	162.74	234.3	169.58	81.42	29.78	175.18
ENSMMUG00000037428	-1.07297	6.4337	1	1	7.81	20.1	0	100.49	0	0	0	39.05	0	0	0	0
ENSMMUG00000035981	-1.06713	6.43164	1	1	7.81	18.5	0	0	51.83	0	40.69	39.05	0	0	0	0
ENSMMUG00000033717	-0.426118	6.50008	1	1	15.48	27.32	48.22	0	51.83	0	0	0	84.79	0	0	29.2
ENSMMUG00000036513	0.339963	6.4357	1	1	19.29	10.05	96.44	50.25	0	0	0	0	0	0	0	0
ENSMMUG00000034071	-0.203217	7.57625	1	1	111.83	118.15	96.44	50.25	51.83	48.27	284.8	195.25	84.79	189.98	119.11	29.2
ENSMMUG00000033223	0.082575	8.4503	1	1	271.28	280.01	48.22	200.99	466.44	434.46	40.69	312.41	423.94	298.55	267.99	262.77
ENSMMUG00000027385	0.0546024	6.55096	1	1	23.29	16.27	48.22	0	0	0	81.37	39.05	0	0	0	29.2
ENSMMUG00000033121	0.311954	6.42302	1	1	11.68	10.05	0	50.25	0	0	0	0	0	0	0	58.39
ENSMMUG00000024896	-0.279302	6.92682	1	1	39.18	44.51	0	0	51.83	48.27	81.37	39.05	0	108.56	89.33	0
ENSMMUG00000023843	-0.427629	6.49869	1	1	15.07	27.01	48.22	50.25	0	0	0	0	84.79	27.14	0	0
ENSMMUG00000026721	-0.356167	6.36458	1	1	5.43	16.96	0	0	0	0	0	0	84.79	27.14	0	0
ENSMMUG00000025698	-0.886721	6.54692	1	1	14.47	24.14	48.22	50.25	0	24.14	40.69	0	0	0	29.78	0
ENSMMUG00000024990	-0.880387	6.54081	1	1	12.64	22.28	0	0	51.83	24.14	0	39.05	0	0	59.55	0
ENSMMUG00000027580	0.759959	6.48215	1	1	18.07	10.05	0	50.25	0	24.14	0	39.05	0	27.14	0	0
ENSMMUG00000027794	0.372661	6.59488	1	1	24.73	16.27	48.22	0	0	48.27	81.37	0	0	27.14	0	0
ENSMMUG00000034121	0.070612	6.54006	1	1	22.28	11.91	48.22	0	0	24.14	0	39.05	0	0	59.55	0
ENSMMUG00000025417	0.0614769	6.9426	1	1	43.81	56.19	0	0	155.48	96.55	40.69	39.05	84.79	54.28	0	29.2
ENSMMUG00000033003	0.0573217	6.54957	1	1	23.29	16.32	48.22	0	51.83	0	0	39.05	0	0	29.78	29.2
ENSMMUG00000027793	-0.339633	7.09653	1	1	52.28	64.65	48.22	100.49	103.65	48.27	0	0	0	135.7	119.11	29.2
ENSMMUG00000034369	-0.00984518	6.92561	1	1	56.09	51.15	192.87	100.49	0	0	40.69	0	84.79	0	29.78	87.59
ENSMMUG00000026454	-0.0738952	7.89397	1	1	152.81	156.16	48.22	150.74	103.65	168.96	203.43	117.15	84.79	108.56	238.21	321.16
ENSMMUG00000028377	1.08722	6.54234	1	1	23.49	16.96	0	0	0	24.14	0	39.05	84.79	54.28	0	0
ENSMMUG00000034409	-0.762336	6.6668	1	1	27.1	30.41	96.44	0	51.83	0	40.69	39.05	0	0	59.55	0
ENSMMUG00000033530	-0.0599875	7.37491	1	1	92.01	93.84	96.44	150.74	207.31	48.27	81.37	117.15	0	81.42	29.78	116.79
ENSMMUG00000024138	-1.06806	6.42505	1	1	5.84	16.27	0	0	0	0	81.37	0	0	0	0	29.2
ENSMMUG00000028206	-0.708124	6.76229	1	1	30.69	36.37	48.22	0	51.83	0	40.69	78.1	0	27.14	89.33	0
ENSMMUG00000026787	-0.405182	6.47909	1	1	11.27	14.09	0	0	0	0	40.69	0	0	27.14	29.78	29.2
ENSMMUG00000027853	0.377445	6.61213	1	1	29.13	25.09	48.22	0	0	0	40.69	39.05	84.79	0	0	58.39
ENSMMUG00000024077	0.102127	6.79384	1	1	39.99	23.82	48.22	0	0	0	0	39.05	0	54.28	119.11	58.39
ENSMMUG00000034426	-0.0268712	9.63409	1	1	724.95	702.18	1205.46	803.95	518.27	168.96	773.02	741.96	254.37	515.67	1161.29	992.68
ENSMMUG00000024301	-0.0207714	6.8078	1	1	32.19	50.19	0	0	0	48.27	81.37	0	169.58	54.28	0	58.39
ENSMMUG00000034996	-0.345389	6.36963	1	1	7.81	16.96	0	0	0	0	0	39.05	84.79	0	0	0
ENSMMUG00000027412	-0.313863	6.95346	1	1	43.45	64.28	48.22	0	0	0	122.06	0	169.58	81.42	29.78	87.59
ENSMMUG00000028491	0.311058	6.42334	1	1	11.68	10.37	0	0	51.83	0	0	0	0	0	0	58.39
ENSMMUG00000035867	0.247841	6.98757	1	1	54.42	48.65	0	150.74	51.83	96.55	40.69	117.15	0	0	0	58.39
ENSMMUG00000035975	0.233871	6.8716	1	1	49.63	45.19	96.44	100.49	0	0	40.69	39.05	84.79	54.28	0	58.39
ENSMMUG00000035843	1.87958	6.35139	1	1	10.67	0	0	0	0	24.14	0	0	0	0	0	29.2
ENSMMUG00000026656	-1.06771	6.43613	1	1	9.64	20.1	48.22	100.49	0	0	0	0	0	0	0	0
ENSMMUG00000027370	-1.04423	6.41684	1	1	5.84	11.91	0	0	0	0	0	0	0	0	59.55	29.2
ENSMMUG00000024828	-0.904212	6.553	1	1	13.24	28.55	0	50.25	51.83	0	40.69	39.05	0	27.14	0	0
ENSMMUG00000035888	-0.796286	6.66592	1	1	22.88	34.51	48.22	50.25	51.83	0	40.69	39.05	0	27.14	29.78	0
ENSMMUG00000025555	0.770441	6.48221	1	1	19.9	8.14	48.22	0	0	24.14	40.69	0	0	27.14	0	0
ENSMMUG00000027638	0.757031	6.48147	1	1	17.11	10.37	0	0	51.83	0	0	0	0	27.14	0	58.39
ENSMMUG00000024083	0.656349	6.97811	1	1	55.87	45.51	0	50.25	51.83	48.27	40.69	39.05	84.79	162.84	0	29.2
ENSMMUG00000025959	-0.432503	6.4911	1	1	11.68	25.09	0	0	0	0	40.69	0	84.79	0	0	58.39
ENSMMUG00000036398	-0.430367	6.59393	1	1	17.52	21.96	0	50.25	0	0	0	0	0	0	59.55	87.59
ENSMMUG00000034405	-0.428388	6.71295	1	1	30.97	30.1	96.44	50.25	0	0	40.69	0	0	0	59.55	58.39
ENSMMUG00000027459	-0.428264	6.60072	1	1	20.91	22.23	48.22	0	0	0	81.37	0	0	27.14	29.78	29.2
ENSMMUG00000028316	-0.422306	6.47711	1	1	9.65	16.32	0	0	51.83	48.27	0	0	0	0	29.78	0
ENSMMUG00000034447	-0.414814	6.49553	1	1	15.48	20.41	48.22	50.25	51.83	0	0	0	0	0	0	29.2
ENSMMUG00000033277	-0.411868	6.48175	1	1	11.27	16.32	0	0	51.83	0	0	0	0	27.14	29.78	29.2
ENSMMUG00000025303	-0.411253	6.49698	1	1	15.62	20.41	0	50.25	51.83	0	0	78.1	0	0	0	0
ENSMMUG00000025278	-0.405645	6.48808	1	1	13.65	16.27	0	0	0	0	81.37	39.05	0	0	0	29.2
ENSMMUG00000037221	-0.40343	6.48529	1	1	13.24	16	0	50.25	0	0	0	39.05	0	27.14	29.78	0
ENSMMUG00000028034	-0.403189	6.48943	1	1	15.07	16.27	48.22	0	0	0	81.37	0	0	27.14	0	0
ENSMMUG00000027817	-0.402889	6.48591	1	1	14.47	16	48.22	50.25	0	24.14	0	0	0	0	29.78	0
ENSMMUG00000036119	-0.401169	6.48636	1	1	13.65	16	0	50.25	0	0	0	39.05	0	0	29.78	29.2
ENSMMUG00000034673	-0.399697	6.48802	1	1	15.07	16.32	48.22	0	51.83	0	0	0	0	27.14	29.78	0
ENSMMUG00000025477	-0.397417	6.48909	1	1	15.48	16.32	48.22	0	51.83	0	0	0	0	0	29.78	29.2
ENSMMUG00000025031	-0.390787	6.48642	1	1	15.48	14.09	48.22	0	0	0	40.69	0	0	0	29.78	29.2
ENSMMUG00000034526	0.372904	6.59998	1	1	25.74	18.19	48.22	50.25	0	24.14	40.69	0	0	27.14	0	29.2
ENSMMUG00000035353	0.361233	6.59432	1	1	21.93	22.91	0	0	0	24.14	0	0	84.79	27.14	29.78	58.39
ENSMMUG00000025942	-0.353713	6.36568	1	1	5.84	16.96	0	0	0	0	0	0	84.79	0	0	29.2
ENSMMUG00000027826	0.351324	6.59718	1	1	22.35	20.1	0	100.49	0	24.14	0	0	0	0	0	87.59
ENSMMUG00000037087	0.35074	6.42677	1	1	17.45	5.96	48.22	0	0	0	0	39.05	0	0	29.78	0
ENSMMUG00000024139	-0.349218	6.35851	1	1	4.83	10.37	0	0	51.83	24.14	0	0	0	0	0	0
ENSMMUG00000024922	-0.349218	6.35851	1	1	4.83	10.37	0	0	51.83	24.14	0	0	0	0	0	0
ENSMMUG00000024468	-0.348361	6.35819	1	1	4.83	10.05	0	50.25	0	24.14	0	0	0	0	0	0
ENSMMUG00000032978	-0.348361	6.35819	1	1	4.83	10.05	0	50.25	0	24.14	0	0	0	0	0	0
ENSMMUG00000034389	0.346925	6.43332	1	1	19.29	8.14	96.44	0	0	0	40.69	0	0	0	0	0
ENSMMUG00000027585	-0.345024	6.36036	1	1	5.43	10.37	0	0	51.83	0	0	0	0	27.14	0	0
ENSMMUG00000036772	-0.345024	6.36036	1	1	5.43	10.37	0	0	51.83	0	0	0	0	27.14	0	0
ENSMMUG00000028137	-0.344172	6.36004	1	1	5.43	10.05	0	50.25	0	0	0	0	0	27.14	0	0
ENSMMUG00000026681	0.342823	6.42287	1	1	15.48	5.96	48.22	0	0	0	0	0	0	0	29.78	29.2
ENSMMUG00000028485	0.342823	6.42287	1	1	15.48	5.96	48.22	0	0	0	0	0	0	0	29.78	29.2
ENSMMUG00000035434	-0.342625	6.36145	1	1	5.84	10.37	0	0	51.83	0	0	0	0	0	0	29.2
ENSMMUG00000026693	-0.341909	6.35582	1	1	4.83	8.14	0	0	0	24.14	40.69	0	0	0	0	0
ENSMMUG00000027812	-0.341909	6.35582	1	1	4.83	8.14	0	0	0	24.14	40.69	0	0	0	0	0
ENSMMUG00000025515	-0.341774	6.36113	1	1	5.84	10.05	0	50.25	0	0	0	0	0	0	0	29.2
ENSMMUG00000028489	-0.341774	6.36113	1	1	5.84	10.05	0	50.25	0	0	0	0	0	0	0	29.2
ENSMMUG00000035858	-0.341774	6.36113	1	1	5.84	10.05	0	50.25	0	0	0	0	0	0	0	29.2
ENSMMUG00000026577	-0.337742	6.35766	1	1	5.43	8.14	0	0	0	0	40.69	0	0	27.14	0	0
ENSMMUG00000026726	-0.335356	6.35875	1	1	5.84	8.14	0	0	0	0	40.69	0	0	0	0	29.2
ENSMMUG00000027588	-0.335356	6.35875	1	1	5.84	8.14	0	0	0	0	40.69	0	0	0	0	29.2
ENSMMUG00000033131	-0.335356	6.35875	1	1	5.84	8.14	0	0	0	0	40.69	0	0	0	0	29.2
ENSMMUG00000035423	-0.335356	6.35875	1	1	5.84	8.14	0	0	0	0	40.69	0	0	0	0	29.2
ENSMMUG00000037053	-0.335356	6.35875	1	1	5.84	8.14	0	0	0	0	40.69	0	0	0	0	29.2
ENSMMUG00000024438	-0.334917	6.904	1	1	46.45	46.73	144.65	0	0	0	0	0	84.79	0	148.88	87.59
ENSMMUG00000035295	-0.334462	6.36539	1	1	7.81	10.37	0	0	51.83	0	0	39.05	0	0	0	0
ENSMMUG00000024995	0.331147	6.41656	1	1	11.68	5.96	0	0	0	0	0	0	0	0	29.78	58.39
ENSMMUG00000024391	-0.330014	6.35168	1	1	4.83	5.96	0	0	0	24.14	0	0	0	0	29.78	0
ENSMMUG00000036269	-0.330014	6.35168	1	1	4.83	5.96	0	0	0	24.14	0	0	0	0	29.78	0
ENSMMUG00000036678	-0.330014	6.35168	1	1	4.83	5.96	0	0	0	24.14	0	0	0	0	29.78	0
ENSMMUG00000025635	-0.329707	6.36784	1	1	9.64	10.37	48.22	0	51.83	0	0	0	0	0	0	0
ENSMMUG00000025415	-0.327224	6.36269	1	1	7.81	8.14	0	0	0	0	40.69	39.05	0	0	0	0
ENSMMUG00000034131	-0.327224	6.36269	1	1	7.81	8.14	0	0	0	0	40.69	39.05	0	0	0	0
ENSMMUG00000035555	-0.327224	6.36269	1	1	7.81	8.14	0	0	0	0	40.69	39.05	0	0	0	0
ENSMMUG00000027426	-0.32586	6.35352	1	1	5.43	5.96	0	0	0	0	0	0	0	27.14	29.78	0
ENSMMUG00000037280	-0.32586	6.35352	1	1	5.43	5.96	0	0	0	0	0	0	0	27.14	29.78	0
ENSMMUG00000032797	0.32478	6.42408	1	1	14.47	8.14	48.22	0	0	24.14	40.69	0	0	0	0	0
ENSMMUG00000028323	-0.323478	6.35461	1	1	5.84	5.96	0	0	0	0	0	0	0	0	29.78	29.2
ENSMMUG00000034125	-0.323478	6.35461	1	1	5.84	5.96	0	0	0	0	0	0	0	0	29.78	29.2
ENSMMUG00000028327	-0.322464	6.36513	1	1	9.64	8.14	48.22	0	0	0	40.69	0	0	0	0	0
ENSMMUG00000037359	-0.322464	6.36513	1	1	9.64	8.14	48.22	0	0	0	40.69	0	0	0	0	0
ENSMMUG00000026211	0.32191	6.4126	1	1	10.26	5.96	0	0	0	24.14	0	0	0	27.14	29.78	0
ENSMMUG00000026703	-0.315333	6.35854	1	1	7.81	5.96	0	0	0	0	0	39.05	0	0	29.78	0
ENSMMUG00000033195	-0.315333	6.35854	1	1	7.81	5.96	0	0	0	0	0	39.05	0	0	29.78	0
ENSMMUG00000034355	-0.315333	6.35854	1	1	7.81	5.96	0	0	0	0	0	39.05	0	0	29.78	0
ENSMMUG00000035870	-0.315333	6.35854	1	1	7.81	5.96	0	0	0	0	0	39.05	0	0	29.78	0
ENSMMUG00000028188	-0.310529	6.36098	1	1	9.64	5.96	48.22	0	0	0	0	0	0	0	29.78	0
ENSMMUG00000033740	-0.310529	6.36098	1	1	9.64	5.96	48.22	0	0	0	0	0	0	0	29.78	0
ENSMMUG00000032860	0.310158	6.42194	1	1	11.27	10.05	0	50.25	0	0	0	0	0	27.14	0	29.2
[truncated: 40 more rows]

[truncated: 6 more sheets: J. DE_smallRNA_Grp6_Grp5, K. PairedDE_smallRNA_Grp3_Grp1, L. PairedDE_smallRNA_Grp5_Grp1, M. PairedDE_smallRNA_Grp4_Grp2, N. PairedDE_smallRNA_Grp6_Grp2, Annotation and Software Informa]
