# Supplementary material for: Effects of Cardiac Sympathetic Neurodegeneration and PPARγ Activation on Rhesus Macaque Whole Blood miRNA and mRNA Expression Profiles
Source: Biomed Res Int. 2020 May 2;2020:9426204. doi: 10.1155/2020/9426204 (PMC7212295; doi:10.1155/2020/9426204)
Supplement: Supplementary 13 — Supplementary Table 12: list of uncorrected p values, FDR-corrected p values, and fold change for all genes on the rhesus inflammatory cytokine and receptor RT2 profiler array. [file 9426204.f7.xlsx]

## Sheet: Sample and Table Info
RNA Sample	Animal	Timepoint	Group
1	Pioglitazone 2	1wk	4
2	Placebo 1	Baseline	1
3	Placebo 1	12wk	5
4	Pioglitazone 2	Baseline	2
5	Pioglitazone 2	12wk	6
6	Placebo 1	1wk	3
7	Pioglitazone 5	Baseline	2
8	Placebo 5	1wk	3
9	Pioglitazone 5	12wk	6
10	Placebo 5	Baseline	1
11	Placebo 5	12wk	5
12	Pioglitazone 5	1wk	4
13	Pioglitzone 4	Baseline	2
5	Placebo 2	1wk	3
15	Placebo 2	12wk	5
16	Pioglitazone 4	1wk	4
17	Pioglitazone 4	12wk	6
18	Placebo 2	Baseline	1
19	Pioglitazone 4	Baseline	2
20	Placebo 3	Baseline	1
21	Pioglitazone 4	12wk	6
22	Placebo 3	1wk	3
23	Pioglitazone 4	1wk	4
24	Placebo 3	12wk	5
25	Placebo 4	1wk	3
26	Placebo 4	12wk	5
27	Pioglitzone 1	Baseline	2
28	Pioglitazone 1	1wk	4
29	Pioglitazone 1	12wk	6
30	Placebo 4	Baseline	1

## Sheet: A. DE_miRNA_Grp2_Grp1
DE_miRNA_Group2_vs_Group1_1
names	logFC	logCPM	PValue	FDR	Group2	Group1	Group1:2	Group2:4	Group2:7	Group1:10	Group2:13	Group1:18	Group2:19	Group2:27	Group1:30
mml-miR-204-5p	-1.72715	4.23042	0.000301128	0.0719696	9.16	30.29	42.88	11.58	5.06	12.17	6.34	49.19	5.97	16.86	16.92
mml-miR-584-3p	-1.20672	4.85761	0.00259646	0.228957	18.18	42.02	18.34	9.89	14.99	56.11	20.74	38.65	18.67	26.64	54.98
mml-miR-29c-3p	1.18414	9.17575	0.00287394	0.228957	769.64	338.69	455.77	1072.22	1172.43	313.46	733.82	295.37	448.06	421.66	290.14
mml-miR-301a-3p	1.29143	3.67532	0.00508577	0.239832	17.02	6.94	8.1	20.76	29.08	11.05	16.1	5.15	12.19	6.95	3.46
mml-miR-101-3p	1.28853	9.64152	0.00589284	0.239832	1082.7	443.2	634.37	1692.72	1771.1	514.57	839.82	421.39	664.63	445.23	202.48
mml-miR-221-3p	1.01414	11.6176	0.00602089	0.239832	4051.14	2005.81	2529.14	4093.94	6730.19	1757.49	2471.29	2091.26	3687.19	3273.07	1645.36
mml-let-7b-5p	0.882991	12.6371	0.0087894	0.300095	7997.07	4336.34	3412.77	10402.8	8537.51	5266.27	6495.37	3551.48	7788.02	6761.63	5114.84
mml-miR-20a-5p	1.15057	6.85259	0.0129661	0.318603	152.62	68.73	105.9	207.49	284.65	60.71	104.9	71.91	65.29	100.79	36.4
mml-miR-138-5p	1.06345	2.95139	0.0139986	0.318603	9.74	4.65	8.1	6.92	16.57	3.6	6.59	4.22	10.82	7.78	2.69
mml-miR-29b-2-5p	0.889923	4.26584	0.0157216	0.318603	23.9	12.89	15.98	24.44	36.03	15.27	20.25	9.02	16.02	22.75	11.28
mml-let-7c-5p	0.848758	7.09829	0.0171156	0.318603	170.48	94.66	103.42	168.79	242.47	129.48	136.62	59.38	150.01	154.54	86.38
mml-miR-106b-5p	1.02943	6.31576	0.0175795	0.318603	102.73	50.31	77.42	116.11	181.33	48.42	104.17	39.12	40.83	71.2	36.27
mml-miR-15a-5p	1.08706	11.0454	0.0179014	0.318603	2763.23	1300.69	2152.93	3728.53	4954.02	1431	2162.81	822.75	1299.27	1671.55	796.09
mml-miR-196b-5p	1.12488	3.77459	0.0192663	0.318603	17.71	8.11	13.95	17.94	36.92	9.06	10.98	4.8	8.69	14.03	4.61
mml-miR-432-5p	0.905934	5.24978	0.0209164	0.318603	47.7	25.45	37.36	58.05	53.3	32.15	40.25	11.01	51.91	35.01	21.27
mml-miR-142-3p	-0.756207	13.7804	0.0237952	0.318603	10771.9	18194.2	15405.7	10229.8	7579.46	13590.7	13767.4	24635.3	10468.3	11814.5	19144.9
mml-miR-183-5p	1.07845	2.92059	0.0238136	0.318603	9.54	4.52	5.51	3.81	20.35	6.08	5.12	3.16	8.86	9.55	3.33
mml-let-7g-5p	1.05508	12.2162	0.0245482	0.318603	6183.75	2976.03	4485.46	9237.22	10217.2	4051.91	4873.05	1537.87	2700.04	3891.24	1828.87
mml-miR-378a	0.820715	6.97583	0.0263846	0.318603	155.63	88.12	98.02	135.03	251.89	73.37	80.14	91.12	154.78	156.31	89.96
mml-miR-340-5p	0.968673	7.54491	0.0266614	0.318603	238.29	121.76	160.93	325.15	156.62	131.59	167.72	95.57	442.1	99.84	98.93
mml-let-7f-5p	1.00456	12.7918	0.0294604	0.328063	9125.44	4548.29	6311.93	12173.8	15898	6699.75	6954.74	2061.86	4437.49	6163.15	3119.63
mml-miR-103-3p	0.823137	12.6764	0.0303062	0.328063	8113.65	4585.93	6822.16	7507.07	13847	4390.07	5499.66	3542.93	7239.55	6474.94	3588.54
mml-miR-106a-5p	0.975946	5.97097	0.0315709	0.328063	79.97	40.64	61.78	95.34	140.64	52.64	80.75	24.83	39.29	43.85	23.32
mml-miR-133d-3p	-1.21495	4.98085	0.0340748	0.33077	19.76	45.87	14.97	18.08	30.67	69.02	19.27	90.88	6.48	24.28	8.59
mml-miR-98	0.904768	6.19783	0.0345994	0.33077	92.29	49.28	68.08	103.68	154.23	72.13	73.19	24.36	53.95	76.39	32.55
mml-miR-4766-3p	-0.83649	4.53337	0.0381447	0.339966	17	30.36	22.39	12.57	7.44	20.73	28.06	36.42	19.01	17.92	41.91
mml-miR-382-5p	1.00979	5.73271	0.0411008	0.339966	68.2	33.85	74.39	81.36	105.3	31.41	46.11	12.18	67.42	40.79	17.43
mml-miR-7	0.828765	10.8934	0.0436737	0.339966	2360.28	1328.85	2006.86	3261.99	3277.21	1562.84	1670.01	709.85	2312.24	1279.95	1035.86
mml-miR-107-3p	0.737641	8.06874	0.0437319	0.339966	326.3	195.68	265.7	317.95	523.04	176.41	216.27	178.14	338.45	235.76	162.5
mml-miR-18b	0.781359	4.59792	0.0455142	0.339966	29.47	17.13	23.18	32.35	45.75	15.77	32.69	18.15	20.63	15.91	11.41
mml-miR-17-5p	0.838432	8.32626	0.0489861	0.339966	398.88	223.05	347.17	479.11	661.4	261.45	394.24	146.98	218.45	241.18	136.61
mml-let-7a-5p	0.807759	14.8369	0.0491825	0.339966	36154.3	20653.8	26434.6	42791.2	57027.5	30105.7	29970.5	10552.4	20943.4	30039	15522.5
mml-miR-190b	0.957435	4.8062	0.0492653	0.339966	35.44	18.21	27.12	82.91	28.29	21.73	31.23	13.12	16.96	17.8	10.89
mml-let-7i-5p	0.882747	13.2971	0.0494936	0.339966	12635	6852.39	11330.9	16523.7	18851.8	9072.01	10952.7	3190.76	6428.58	10418.5	3815.88
mml-miR-454-3p	0.860324	8.74141	0.0497858	0.339966	534.45	294.38	440.24	720.23	908.33	375.04	429	178.84	293.03	321.7	183.39
mml-miR-93-5p	0.885959	15.3159	0.0554581	0.347732	51237.7	27726.1	50226	62722.2	85867.4	31853.3	47613.4	13141.2	27647.4	32337.9	15684
mml-let-7d	0.719323	11.5179	0.0566283	0.347732	3552.08	2157.47	2399.04	3354.93	4911.35	3038.53	2635.47	1165.56	2490.46	4368.18	2026.74
mml-miR-126	1.02104	9.88155	0.0585948	0.347732	1217.55	599.94	1202	2022.82	1958.78	727.85	682.11	265.51	849.5	574.55	204.4
mml-miR-16-5p	0.876372	16.9187	0.0587642	0.347732	155320	84608.1	138600	223040	261829	103390	119108	40620.6	76329.8	96291.8	55821.8
mml-miR-20b-5p	0.875775	4.6128	0.0587755	0.347732	30.39	16.54	31.06	35.74	42.18	20.73	32.2	7.96	21.9	19.92	6.41
mml-miR-378d	0.70732	4.32851	0.0606498	0.347732	23.99	14.69	14.97	29.38	34.34	14.65	10.98	13	23.78	21.45	16.15
mml-miR-199a-3p	0.93316	5.11587	0.0612984	0.347732	43.64	22.86	25.88	25	47.34	38.48	22.08	21.32	78.41	45.38	5.77
mml-miR-26b-3p	-0.699799	6.17224	0.0625627	0.347732	56.29	91.41	89.24	40.4	32.36	102.79	80.99	73.67	39.29	88.41	99.96
mml-miR-133c-3p	-1.13535	3.93843	0.0644997	0.35035	9.86	21.67	6.3	8.33	13.89	25.33	10.12	52.23	3.41	13.56	2.82
mml-let-7e-5p	0.710904	4.92553	0.0687555	0.357889	36.47	22.27	28.36	38.42	52.5	31.9	28.18	11.01	27.27	35.95	17.81
mml-miR-335-3p	-0.812787	4.42286	0.0688825	0.357889	15.89	27.92	16.32	14.97	9.23	9.68	16.71	31.86	17.3	21.22	53.82
mml-miR-155	0.727075	7.96957	0.0704729	0.358362	303.9	183.58	245.55	346.76	385.98	271.87	178.09	97.21	249.47	359.18	119.69
mml-let-7a-3p	-0.725133	6.72083	0.0730255	0.363606	81.58	134.86	106.46	75.85	28.88	100.68	131.25	180.95	99.55	72.38	151.35
mml-miR-144	0.768555	6.85449	0.0750218	0.365923	141.48	83.03	77.54	273.74	137.56	93.98	87.21	114.07	138.76	70.14	46.52
mml-miR-16-1-3p	0.825255	2.70852	0.0785161	0.375307	7.83	4.4	6.41	11.86	10.72	1.99	7.68	5.74	6.31	2.59	3.46
mml-miR-18a-5p	0.641302	3.70498	0.0822299	0.385352	15.26	9.76	11.03	21.33	16.18	8.94	15.86	12.53	13.04	9.9	6.54
mml-miR-21-5p	0.604028	9.07109	0.0854951	0.392949	634.03	417.13	540.4	802.01	829.43	328.61	435.59	399.02	650.57	452.54	400.48
mml-miR-181a-5p	0.6589	7.17154	0.0902704	0.400812	171.92	108.91	87.78	137.43	205.74	117.69	70.38	92.52	231.49	214.54	137.64
mml-miR-151-3p	-0.571463	10.2652	0.0921236	0.400812	1011.86	1503.65	1298.33	758.93	727.4	1886.98	1414.34	1465.73	885.38	1273.23	1363.55
mml-miR-186-5p	-0.576023	11.5749	0.0939465	0.400812	2504.23	3733.13	3210.99	2285.4	1606.55	2632.21	3289.89	4249.5	2356.82	2982.5	4839.83
mml-miR-190a-5p	1.3342	5.94616	0.0948757	0.400812	83.9	33.26	65.16	144.78	13.8	4.84	9.03	44.86	210.52	41.38	18.2
mml-miR-26b-5p	0.75894	10.8879	0.0955912	0.400812	2315.61	1368.35	1730.24	2738.95	4296.6	2165.43	1836.39	649.54	1247.45	1458.65	928.21
mml-miR-337-5p	0.864135	2.56121	0.104712	0.426184	7.09	3.88	9.68	7.06	11.61	2.36	7.56	1.29	5.54	3.65	2.18
mml-miR-424-5p	0.762529	6.16851	0.105209	0.426184	87.72	51.7	48.95	147.89	117.51	37.86	89.17	55.63	65.54	18.51	64.33
mml-miR-93-3p	-0.561871	10.6684	0.112286	0.447271	1343	1982.52	1485.03	1026.59	993.98	1502.26	1683.67	3141.22	1381.17	1629.58	1801.57
mml-miR-331-5p	0.537771	5.44748	0.118648	0.464866	50.39	34.7	29.6	64.27	55.78	32.03	42.57	32.44	33.24	56.11	44.73
mml-miR-19a-3p	0.595907	7.29387	0.121627	0.468851	184.44	122.01	126.94	278.97	192.34	125.26	158.94	161.51	200.81	91.12	74.33
mml-miR-181b-5p	0.566596	5.6437	0.125823	0.477328	58.13	39.27	32.64	44.63	90.22	36.75	30.86	45.91	60	64.95	41.78
mml-miR-26a-2-3p	-0.593358	3.7714	0.134053	0.500604	10.98	16.52	14.18	17.51	5.16	14.9	11.47	24.83	8.52	12.26	12.17
mml-miR-340-3p	-0.502514	6.83355	0.145496	0.52425	96.06	136.06	119.4	119.5	51.11	137.43	129.3	155.53	93.75	86.64	131.87
mml-miR-23a-3p	-0.492438	11.2953	0.146315	0.52425	2128.19	2994	3659.56	1530.85	1668.08	2743.56	2089.74	2204.74	2285.14	3067.13	3368.12
mml-miR-146a-5p	0.519248	7.90356	0.146965	0.52425	276.33	192.81	230.14	283.49	416.55	236	220.05	135.04	273.76	187.78	170.06
mml-miR-1271-5p	-0.574371	7.08627	0.156765	0.53877	111.44	165.93	183.55	82.49	155.82	105.65	176.14	263.05	69.55	73.2	111.49
mml-miR-152-3p	0.611645	2.9957	0.157716	0.53877	9.17	5.99	5.85	16.67	7.05	5.34	3.17	6.09	10.82	8.13	6.66
mml-miR-942-5p	-0.510417	11.1933	0.159035	0.53877	1969.87	2805.99	1718.2	1804.87	1440.01	2474.54	2302.59	3202.12	1371.12	2930.75	3829.08
mml-miR-15b-3p	-0.480279	11.3661	0.160053	0.53877	2245.26	3132.15	3348.4	2455.18	1235.35	2427.62	3090.94	3263.49	2238.94	2205.9	3489.09
mml-miR-10a-5p	-0.461771	5.90223	0.165194	0.542671	51.02	70.28	88	39.83	35.53	65.55	56.48	60.78	58.89	64.36	66.77
mml-miR-200c-3p	0.645769	3.48335	0.168812	0.542671	13.04	8.32	15.19	11.58	25.31	8.94	7.68	4.8	7.76	12.85	4.36
mml-miR-148a-3p	0.512144	9.63446	0.169939	0.542671	916.25	642.46	875.64	1047.36	798.96	522.15	633.56	427.48	1421.66	679.7	744.57
mml-miR-370-3p	0.626776	5.02057	0.170294	0.542671	38.21	24.73	47.38	49.01	49.62	28.68	26.84	8.78	38.95	26.64	14.1
mml-miR-493-5p	0.754371	2.68512	0.175508	0.550959	7.56	4.47	9.68	6.92	14.19	4.84	3.66	0.94	4.09	8.96	2.43
mml-miR-636	-0.520733	4.4709	0.178931	0.550959	18.4	26.41	13.05	13.7	13.3	24.46	18.66	29.16	16.62	29.71	38.96
mml-miR-3122	0.4575	3.81662	0.184725	0.550959	15.76	11.48	10.35	14.41	22.53	12.79	15.98	11.24	12.44	13.44	11.53
mml-miR-7204-3p	-0.433915	6.07612	0.18647	0.550959	58.17	78.59	65.05	50.43	40	73.37	66.36	96.86	62.99	71.08	79.07
mml-miR-28-3p	-0.43933	7.64428	0.186646	0.550959	172.53	233.96	233.51	134.19	127.54	238.48	195.17	171.93	181.8	223.97	291.93
mml-miR-130a-3p	0.573025	3.69713	0.186727	0.550959	14.92	10.02	12.27	21.75	24.81	12.41	9.03	5.15	10.06	8.96	10.25
mml-miR-582-3p	-0.91531	2.59834	0.191398	0.557855	4.2	7.9	13.62	1.98	0.99	7.95	4.76	0.7	1.11	12.14	9.36
mml-miR-503-5p	0.58989	7.1005	0.197406	0.562143	161.03	106.98	93.74	190.97	277.4	102.91	186.99	75.19	105.09	44.68	156.09
mml-let-7b-3p	-0.612665	5.86593	0.197573	0.562143	47.03	71.93	44.34	29.8	9.53	60.83	80.63	86.32	62.99	52.22	96.24
mml-miR-210-3p	0.533966	9.14827	0.2017	0.567133	657.61	454.16	726.31	795.09	974.53	503.15	714.55	357.91	465.79	338.08	229.27
mml-miR-140-5p	0.479433	6.36688	0.20512	0.570043	94.15	67.5	87.22	118.37	128.33	47.67	109.9	75.54	60.86	53.28	59.59
mml-miR-130b-3p	0.526257	4.92726	0.209973	0.571469	34.96	24.26	28.02	54.52	53.2	30.29	25.25	13.23	19.69	22.16	25.5
mml-miR-34a-5p	0.58228	6.61007	0.210415	0.571469	114.32	76.35	121.43	90.82	200.38	81.44	73.55	22.84	70.57	136.27	79.71
mml-miR-29c-5p	-0.458548	6.02749	0.215384	0.57656	55.74	76.6	60.88	33.9	38.81	54.62	84.17	100.02	50.97	70.85	90.86
mml-miR-374a-5p	0.4836	6.35922	0.217632	0.57656	93.75	67.02	100.38	134.04	124.36	67.78	60.99	63.01	63.41	85.93	36.91
mml-miR-363-3p	0.467673	4.54314	0.219527	0.57656	26.33	19.02	27.01	25.71	14.99	22.22	25.13	14.05	27.53	38.31	12.82
mml-miR-187-3p	0.499357	9.68224	0.227406	0.577875	944.12	667.87	1166.89	1054.98	628.74	631.27	1123.55	246.42	1046.3	867.01	626.92
mml-miR-128a-3p	-0.404452	11.9799	0.228366	0.577875	3531.37	4674.06	4705.92	3359.17	2140.51	4138.06	5093.22	4335	3342.69	3721.25	5517.24
mml-miR-339-5p	-0.438023	14.3298	0.228955	0.577875	17787.8	24097.9	18885.8	20130.9	10472.7	17379.7	25620.2	35191.1	19180.6	13534.6	24935.1
mml-miR-30e-3p	-0.389216	8.36454	0.229699	0.577875	289.53	379.18	346.16	339.56	246.14	307.01	375.33	408.98	246.4	240.24	454.56
mml-miR-576-5p	-0.454097	5.72943	0.23907	0.590293	45.37	62.16	38.26	40.26	20.54	62.2	49.89	92.17	50.29	65.9	56
mml-miR-424-3p	0.452472	4.97639	0.23972	0.590293	35.49	25.95	17.56	39.83	47.34	23.71	33.54	20.5	37.16	19.57	42.03
mml-miR-500b-5p	-0.394508	3.46429	0.245602	0.590293	9.46	12.48	11.14	7.06	10.12	10.55	8.66	14.64	12.61	8.84	13.58
mml-miR-128b-3p	-0.3966	11.762	0.246157	0.590293	3044.78	4008.14	3917.49	2949.69	1778.55	3385.26	4464.54	3839.47	2727.4	3303.72	4890.32
mml-miR-331-3p	-0.424681	11.6316	0.248064	0.590293	2753.76	3696.28	2573.59	2293.59	1583.72	4220.24	4024.57	4076.99	1956.57	3910.33	3914.3
mml-miR-500a-5p	-0.388628	3.78533	0.249454	0.590293	11.92	15.61	14.63	9.6	13	11.55	11.95	20.38	10.65	14.38	15.89
mml-miR-7180-5p	-0.500189	6.69652	0.258354	0.605359	87.39	123.62	69.1	38.56	53.79	81.69	84.41	154.95	89.49	170.69	188.77
mml-miR-296-5p	-0.344215	10.2571	0.262976	0.610206	1092.64	1387.07	1271.1	1066.85	1087.67	1669.85	1079.76	1481.89	1093.86	1135.07	1125.44
mml-let-7f-3p	-0.452476	5.23811	0.268042	0.612796	32.24	44.12	37.59	22.03	11.61	34.51	55.13	53.76	37.76	34.66	50.62
mml-miR-30c-5p	-0.35831	13.3712	0.26922	0.612796	9415.68	12070.2	11089.2	9676.36	6320.88	10730.2	12680.4	12828.7	8671.35	9729.39	13632.5
mml-miR-330-5p	-0.431878	3.28167	0.277103	0.624789	8.24	11.1	7.65	6.5	4.76	8.07	12.32	13.94	6.05	11.55	14.74
mml-miR-491-3p	-0.418619	3.75298	0.280261	0.626004	11.54	15.41	13.39	12.85	5.46	12.04	18.91	20.96	12.02	8.49	15.25
mml-miR-130b-5p	-0.374454	5.94868	0.28422	0.628844	54.39	70.5	48.05	51.13	35.23	65.67	62.82	78.94	45.43	77.33	89.32
mml-miR-379-5p	0.664662	3.59055	0.286795	0.628844	14.13	8.9	24.65	16.95	26.7	6.46	10.86	2.69	8.61	7.54	1.79
mml-miR-1260b	-0.365793	5.54396	0.301444	0.64618	41.15	53.04	33.42	31.22	33.35	57.73	36.47	61.02	38.7	66.01	59.98
mml-miR-222-3p	0.366754	7.86913	0.30153	0.64618	259.47	201.21	181.75	314.84	349.56	146.99	185.16	262.34	178.64	269.12	213.76
mml-miR-671-3p	-0.366461	7.871	0.305897	0.64618	207.24	267.18	187.49	136.16	151.45	218.74	232.86	354.28	203.45	312.27	308.21
mml-miR-365-3p	-0.364939	3.54171	0.308474	0.64618	10.11	13.05	14.74	8.19	8.83	12.04	13.91	9.25	12.44	7.19	16.15
mml-miR-339-3p	-0.349314	9.50324	0.315602	0.64618	646.74	823.91	768.28	822.21	456.45	505.01	676.01	1092.59	778.76	500.29	929.75
mml-miR-30b-5p	-0.337391	10.4023	0.315814	0.64618	1211.27	1530.37	1534.65	1252.45	819.6	1206.42	1808.94	1842.97	1056.19	1119.16	1537.45
mml-miR-32-5p	0.443274	3.99381	0.31823	0.64618	17.83	13.08	13.28	37.71	15.98	7.95	9.39	19.44	14.4	11.67	11.66
mml-miR-425	-0.354751	14.2653	0.318271	0.64618	17520.2	22404.2	15880.9	15667	12757.5	15281.9	15737.6	32372.9	18107	25331.9	26081.2
mml-miR-221-5p	0.374894	3.09913	0.319034	0.64618	9.27	7.16	7.65	8.62	13.99	7.82	5.25	5.86	9.63	8.84	7.3
mml-miR-484	-0.373185	13.6778	0.332563	0.66116	11584.9	15004.8	8297.74	6908.46	7858.65	14580.9	10737.8	19679.2	12964.5	19454.9	17461.5
mml-miR-6827-3p	-0.329597	4.17623	0.340763	0.66116	16.02	20.13	22.06	11.3	12.31	16.51	18.91	25.18	16.02	21.57	16.79
mml-miR-6529-3p	-0.349578	4.88249	0.345747	0.66116	26.1	33.25	23.86	20.06	15.48	31.66	42.81	42.75	21.39	30.77	34.73
mml-miR-324-5p	-0.313953	7.70056	0.346128	0.66116	187.54	233.12	164.08	190.97	135.28	196.77	227	277.92	171.91	212.54	293.73
mml-miR-423-3p	-0.358834	12.6962	0.346771	0.66116	5896.05	7561.04	4572.9	3494.34	4359.72	6947.17	5349.01	8698.69	5893.07	10384.1	10025.4
mml-miR-7205-3p	0.465476	5.65713	0.347598	0.66116	57.26	41.45	41.53	34.89	29.38	49.78	54.4	60.67	39.38	128.25	13.84
mml-miR-134-5p	0.393401	5.0122	0.348254	0.66116	35.85	27.28	51.65	41.67	46.05	25.82	30.98	11.13	32.47	28.06	20.5
mml-miR-660-5p	0.310969	5.59589	0.348561	0.66116	52.68	42.46	46.82	64.69	53.89	36.37	54.77	39.35	53.87	36.19	47.29
mml-miR-654-3p	-0.398598	7.9333	0.363678	0.684401	213.94	282.01	633.92	169.78	156.12	142.02	291.04	196.29	249.3	203.46	155.83
mml-miR-486-5p	-0.318419	17.3439	0.373545	0.697479	149897	186916	120482	128146	90115.1	199004	184151	215353	123302	223772	212826
mml-miR-376c-3p	0.382515	3.0083	0.376566	0.697669	8.7	6.67	12.72	9.32	8.44	3.85	7.32	3.98	12.78	5.66	6.15
mml-miR-30d-5p	-0.277725	13.1108	0.382786	0.700709	8083.17	9799.07	10536.3	8190.43	5426.55	9023.84	9042.04	8945.23	7971.35	9785.5	10690.9
mml-miR-23b-3p	-0.279261	9.76691	0.384071	0.700709	795.49	965.39	1076.97	757.66	546.17	971.92	741.87	845.01	1018.51	913.22	967.68
mml-miR-361-5p	-0.273869	11.4119	0.387014	0.700731	2492.85	3014	2833.77	1761.23	2462.67	3114.25	2507.03	2594.16	2804.71	2928.62	3513.83
mml-miR-18a-3p	-0.37095	9.37842	0.394799	0.704732	588.62	761.22	380.26	321.91	340.03	557.03	556.71	1063.66	543.44	1181.05	1043.93
mml-miR-584-5p	0.31347	9.29732	0.398854	0.704732	688.7	554.22	581.59	495.08	1227.81	686.26	534.75	438.61	673.67	512.19	510.43
mml-miR-185-5p	0.285737	11.7049	0.400927	0.704732	3627.89	2976.05	2163.06	3010.99	4217.3	3478.37	3475.42	2237.89	3347.04	4088.69	4024.9
mml-miR-15b-5p	0.320644	13.5213	0.404587	0.704732	12899.9	10329.1	11979.9	15221.5	19059.8	14438.1	9799.04	5119.57	9554.61	10864.3	9778.71
mml-miR-1249	-0.416132	6.8839	0.406348	0.704732	102.63	136.95	101.62	41.1	31.26	107.14	260.18	167.95	103.98	76.62	171.08
mml-miR-1296-5p	-0.357322	7.28901	0.406916	0.704732	138.81	177.85	148.44	42.09	103.12	262.44	174.43	122.39	135.6	238.83	178.13
mml-miR-7186-5p	0.273383	5.67447	0.411825	0.708102	55.07	45.55	53.68	60.88	71.76	40.35	42.45	48.72	52.5	47.74	39.47
mml-miR-26a-5p	0.290693	11.8523	0.419406	0.715985	4023.58	3289.31	3890.04	4755.83	5763.99	3163.04	2262.46	2777.68	2926.42	4409.2	3326.47
mml-miR-7186-3p	-0.308899	6.0792	0.434032	0.734627	60.93	75.46	77.87	71.47	40.79	47.05	97.58	106.69	66.4	28.41	70.23
mml-miR-491-5p	-0.253675	7.55576	0.436473	0.734627	173.11	206.43	169.25	119.92	150.46	195.28	167.11	224.87	219.9	208.18	236.31
mml-miR-106b-3p	0.252337	11.4823	0.445328	0.74429	3080.52	2586.21	2116.58	2571.14	3354.03	2720.6	2553.5	2498.01	2714.53	4209.4	3009.67
mml-miR-151-5p	-0.238359	6.42646	0.44936	0.745812	79.44	93.72	90.93	66.95	74.83	119.18	90.63	84.79	77.9	86.88	79.97
mml-miR-92b-3p	-0.388227	7.76027	0.455858	0.751381	190.45	249.26	174.21	69.78	80.69	139.91	164.67	380.98	120.09	517.02	301.93
mml-miR-181a-3p	-0.259066	3.99038	0.467361	0.758167	14.38	17.25	16.77	10.59	10.72	12.54	12.56	18.04	22.59	15.44	21.66
mml-miR-187-5p	-0.382555	5.68495	0.468752	0.758167	45.14	58.84	94.19	63.42	10.42	64.31	59.4	12.77	65.2	27.23	64.08
mml-miR-192-5p	-0.279804	9.00385	0.469493	0.758167	468.58	568.86	406.82	405.95	181.73	505.26	736.87	728.24	503.21	515.14	635.13
mml-miR-148a-5p	-0.312931	3.13372	0.476397	0.759385	7.71	9.59	10.8	3.81	5.36	5.21	4.51	10.42	8.35	16.5	11.92
mml-miR-22	0.26271	10.4706	0.482018	0.759385	1532.08	1277.02	1810.48	1050.89	2317.57	1028.9	1267.12	1369.69	1140.74	1884.08	898.99
mml-miR-27a-3p	-0.229376	6.40755	0.48344	0.759385	78.64	92.19	116.36	72.18	69.97	76.35	93.8	64.06	79.69	77.57	112.01
mml-miR-1306-5p	-0.26017	7.93665	0.485194	0.759385	225.03	269.49	167.68	221.48	138.55	416.75	243.71	195.7	188.02	333.37	297.83
mml-miR-122a-5p	0.452771	5.79091	0.486133	0.759385	62.57	45.74	11.14	17.51	90.22	101.3	23.66	52.82	139.35	42.08	17.69
mml-miR-30c-1-3p	0.223106	5.0641	0.490849	0.761771	35.49	30.4	28.7	34.18	35.33	36	40.98	25.77	33.92	33.01	31.14
mml-miR-6790-3p	-0.23878	4.2608	0.498841	0.769181	17.54	20.7	14.52	13.28	13.1	18.37	25.49	23.66	17.56	18.27	26.27
mml-miR-431	0.283954	4.51836	0.517763	0.790499	24.63	20.22	43.55	20.76	29.58	13.04	21.22	9.96	30	21.57	14.35
mml-miR-324-3p	-0.221474	7.5784	0.519281	0.790499	177.79	207.3	133.81	124.16	135.38	253.87	210.41	217.25	177.45	241.54	224.27
mml-miR-3200-3p	-0.238775	7.69205	0.523992	0.792621	191.27	225.71	162.73	120.91	143.32	235.62	268.35	154.36	163.13	260.63	350.11
mml-miR-505-3p	-0.241532	6.2248	0.534665	0.793244	68.98	81.56	74.72	42.8	41.78	76.1	91	46.5	70.4	98.9	128.92
mml-miR-140-3p	-0.194288	13.1616	0.53625	0.793244	8610.88	9852.21	9443.02	9782.01	5847.17	9732.2	10222.5	10048	8434.5	8768.19	10185.6
mml-miR-335-5p	-0.273465	4.19331	0.537499	0.793244	16.51	20	11.82	14.12	10.42	19.24	16.59	12.41	32.56	8.84	36.52
mml-miR-197-3p	-0.229086	11.8268	0.539924	0.793244	3374.21	3954.89	2390.49	2304.47	2334.04	4377.04	3481.64	4506.69	2745.13	6005.78	4545.33
mml-miR-299-5p	-0.235689	6.51288	0.547775	0.793244	84.43	99.4	192.32	72.04	59.95	63.44	88.68	84.44	107.99	93.48	57.41
mml-miR-652	0.19805	8.13534	0.548173	0.793244	297.93	259.72	238.13	267.81	344.59	231.9	223.83	289.98	265.24	388.18	278.86
mml-miR-503-3p	0.223174	5.7072	0.550259	0.793244	55.55	47.6	41.86	63.56	75.13	42.46	62.21	39.94	49.52	27.35	66.13
mml-miR-223	-0.207711	15.2348	0.552846	0.793244	36077.6	41664.4	49848.7	38316.2	23246.4	40146.3	39514.8	22714.8	35327.4	43983.2	53947.8
mml-miR-138-3p	0.2392	3.14312	0.557538	0.793244	9.23	7.83	6.19	11.02	6.65	12.29	7.93	3.86	12.53	8.02	8.97
mml-miR-185-3p	0.249945	4.24499	0.562138	0.793244	20.15	16.96	10.92	11.58	21.93	21.1	14.03	11.59	15.26	37.96	24.22
mml-miR-381-3p	-0.246589	5.05246	0.562575	0.793244	30.43	36.09	77.87	23.87	30.37	16.01	39.28	28.69	32.22	26.41	21.79
mml-miR-942-3p	-0.27314	2.73746	0.564232	0.793244	5.91	7.15	1.46	7.06	5.06	12.04	8.05	4.57	4.09	5.3	10.51
mml-miR-194-5p	0.18327	8.18648	0.57275	0.796079	307.4	270.72	274.25	279.11	289.71	238.48	371.67	289.87	230.64	365.9	280.27
mml-miR-196a-5p	-0.263839	7.78989	0.572911	0.796079	202.96	243.7	404.12	199.02	372.18	349.09	128.69	155.06	167.56	147.35	66.51
mml-miR-191-5p	-0.174352	16.5104	0.591647	0.807276	88313.4	99657.9	84599.7	110990	70089.7	135283	75956	77367.4	90172.1	94359	101381
mml-miR-7180-3p	0.195149	4.46928	0.593911	0.807276	23.21	20.3	16.32	14.12	21.44	21.85	26.23	15.34	24.46	29.82	27.68
mml-miR-150-5p	-0.172626	14.55	0.597429	0.807276	22704.7	25590.7	24446.4	18760.3	22445	37041.3	22143	18005	23377.6	26797.7	22870
mml-miR-532-5p	0.176088	7.08584	0.604274	0.807276	142.92	126.49	157.33	171.33	148.97	123.89	151.01	122.97	153.93	89.35	101.75
mml-miR-19b	-0.169787	12.1943	0.607764	0.807276	4439.94	4994.45	4268.61	5629.17	3398.19	4688.26	4938.43	6311.95	5241.64	2992.28	4708.98
mml-miR-532-3p	-0.170601	9.64586	0.608209	0.807276	758.58	853.79	646.52	756.81	510.64	1099.78	1011.45	831.89	642.64	871.37	836.97
mml-miR-1226	-0.192044	8.08273	0.611599	0.807276	254.77	291.05	145.96	184.47	155.72	367.34	369.6	287.06	232.68	331.36	363.83
mml-miR-25	0.16736	16.0196	0.611696	0.807276	69829.5	62181.1	62232.1	78493.4	75801.6	61843.1	79495.9	49228.4	49682.6	65674	75420.8
mml-miR-296-3p	-0.199874	4.19906	0.611959	0.807276	17	19.55	19.69	7.77	13.89	28.06	19.52	9.96	19.77	24.05	20.5
mml-miR-671-5p	0.188562	4.45128	0.615607	0.807276	22.88	20.08	15.76	18.22	22.93	13.9	21.22	33.38	29.49	22.52	17.3
mml-miR-628-3p	0.193697	3.30721	0.620139	0.807276	10.22	8.95	11.14	8.62	14.89	10.3	5.73	6.68	10.91	10.96	7.69
mml-miR-485-3p	0.185094	8.49206	0.622036	0.807276	380.17	334.38	492.01	400.86	219.04	362.25	458.15	266.56	493.66	329.12	216.71
mml-miR-664	-0.189474	3.21762	0.630296	0.807276	8.55	9.74	7.31	9.32	4.27	7.82	7.44	15.11	9.46	12.26	8.71
mml-miR-30a-5p	0.248221	6.71932	0.631048	0.807276	113.06	95.2	178.93	53.67	96.87	107.38	62.94	28.34	139.18	212.66	66.13
mml-miR-376a-3p	0.192354	4.13036	0.635797	0.807276	18.29	16	26.9	20.76	13.2	10.8	19.39	11.71	27.02	11.08	14.61
mml-miR-374b-5p	0.191452	6.80099	0.640439	0.807276	117.79	103.13	163.29	142.24	194.03	96.58	78.68	88.07	66.74	107.27	64.59
mml-miR-627-5p	0.170651	6.24187	0.645434	0.807276	79.41	70.54	68.53	115.96	73.84	91.87	79.41	39.47	74.07	53.75	82.27
mml-miR-148b-3p	0.158279	9.36355	0.645902	0.807276	690.37	618.66	503.15	581.94	593.61	562.49	720.77	487.33	871.24	684.3	921.68
mml-miR-487b-3p	0.214661	3.57847	0.647295	0.807276	12.48	10.74	24.08	14.97	10.42	6.46	10.73	5.5	17.3	8.96	6.92
mml-miR-29a-3p	0.164145	7.71313	0.649429	0.807276	220.12	196.46	234.98	201.42	285.44	205.08	208.34	97.68	204.9	200.51	248.1
mml-miR-502-3p	-0.145059	4.76017	0.651901	0.807276	25.65	28.38	31.4	18.79	23.82	24.7	27.45	29.75	32.13	26.05	27.68
mml-miR-451	-0.143463	15.3703	0.66852	0.820664	40476.6	44708.6	43864	42601.6	27687.6	31437.5	33083.1	50558.5	41708.2	57302.6	52974.3
mml-miR-182	0.160989	4.94714	0.669579	0.820664	32.1	28.74	22.96	18.22	46.55	39.11	24.64	26.12	36.65	34.42	26.78
mml-miR-320b	0.174077	5.48498	0.677736	0.824585	46.92	41.61	20.03	37.57	46.45	41.22	30.01	31.62	52.42	68.13	73.56
mml-miR-494-3p	-0.17412	5.35348	0.68011	0.824585	38.45	43.38	92.17	43.93	32.95	28.06	37.81	25.88	54.12	23.46	27.42
mml-miR-409-5p	0.192177	3.55222	0.683129	0.824585	12.16	10.64	24.2	11.58	10.32	4.97	11.34	6.09	18.24	9.31	7.3
mml-miR-1180-3p	0.15693	8.88477	0.687843	0.826103	495.14	444.13	260.18	332.5	493.47	597.25	363.01	355.45	481.13	805.6	563.62
mml-miR-142-5p	0.152084	12.8597	0.696763	0.832632	7778.37	7000.13	5020.12	11232.6	3966.59	6900.74	6806.17	9605.89	10936.2	5950.26	6473.78
mml-miR-409-3p	0.149118	9.66689	0.710577	0.844915	849.73	766.28	1435.17	988.6	674.3	685.15	900.2	455.24	1039.23	646.34	489.54
mml-miR-361-3p	-0.123453	11.7745	0.722053	0.849063	3369.39	3670.4	2332.76	3568.78	2274.69	4379.77	4887.2	4640.79	3517.58	2598.68	3328.26
mml-miR-125b-5p	0.138683	8.99136	0.722404	0.849063	530.3	481.71	355.73	622.48	398.09	486.14	322.51	600.7	930.47	377.93	484.29
mml-miR-92a-3p	-0.12147	16.9066	0.724723	0.849063	118242	128628	84994.5	106806	94886.8	132156	93174.1	129619	106198	190143	167744
mml-miR-329-3p	-0.173871	2.94587	0.729293	0.850249	7.08	7.97	18.46	8.47	2.68	5.34	8.9	2.58	9.2	6.13	5.51
mml-miR-199a-5p	0.157049	3.64935	0.743444	0.86254	12.92	11.57	9.34	9.46	4.86	10.68	16.83	20.38	12.1	21.34	5.9
mml-miR-125a-5p	-0.107624	8.74046	0.753766	0.87029	413.24	445.26	381.95	460.75	242.96	491.48	302.14	490.72	633.01	427.32	416.88
mml-miR-342-3p	-0.100941	9.90244	0.768502	0.881881	926.93	994.15	951.83	605.81	1119.33	1444.16	876.66	661.48	1217.44	815.38	919.11
mml-miR-154-5p	-0.111777	5.41573	0.771185	0.881881	40.99	44.28	77.99	28.53	29.97	26.19	62.94	36.42	37.67	45.86	36.52
mml-miR-191-3p	-0.0964083	6.49848	0.778867	0.885806	87.49	93.55	106.35	53.53	76.52	119.3	117.47	59.61	96.91	93.01	88.94
mml-miR-148b-5p	0.101702	3.91029	0.78203	0.885806	15.28	14.22	15.64	18.08	18.66	11.17	14.15	13.94	9.97	15.56	16.15
mml-miR-543-3p	0.109958	2.99768	0.808346	0.909668	8	7.42	12.72	5.93	6.15	5.59	7.2	4.22	11.76	8.96	7.18
mml-miR-369-5p	0.106489	3.83688	0.813088	0.909668	14.52	13.47	29.15	15.11	16.77	7.2	13.42	8.43	14.32	12.97	9.1
mml-miR-29b-3p	0.0841007	7.99875	0.814514	0.909668	262.18	247.3	225.3	391.4	270.16	189.94	246.76	256.02	179.41	223.15	317.95
mml-miR-30a-3p	0.0897308	4.65554	0.830369	0.922645	25.65	24.11	38.71	18.5	31.06	24.33	16.96	11.48	27.87	33.83	21.91
mml-miR-6529-5p	-0.0746979	8.06998	0.83552	0.922645	262.29	276.25	150.46	200.57	169.62	304.77	251.15	240.21	329.16	360.95	409.58
mml-miR-16-2-3p	0.114253	7.06735	0.843337	0.922645	138.56	128.01	75.85	167.1	51.11	51.89	129.54	292.56	279.39	65.66	91.76
mml-miR-323b-3p	0.0829443	6.217	0.849176	0.922645	76.05	71.78	138.87	91.11	45.56	62.44	69.77	43.92	102.02	71.79	41.91
mml-let-7i-3p	0.0671401	4.69479	0.851164	0.922645	26.23	25	23.07	40.11	19.65	24.08	26.71	29.4	19.35	25.34	23.45
mml-miR-338-3p	0.0835235	4.47263	0.852945	0.922645	22.54	21.27	26.78	18.22	26.5	18.75	20.86	8.55	12.96	34.19	31.01
mml-miR-199a	0.0953571	3.78282	0.853157	0.922645	13.94	13.03	10.69	7.34	4.76	9.68	20.25	23.31	13.04	24.28	8.46
mml-miR-27b-3p	0.061473	8.20333	0.862939	0.92902	300.09	287.56	346.72	385.75	355.31	301.3	275.79	187.74	252.8	230.81	314.49
mml-miR-337-3p	-0.0738649	2.95067	0.871402	0.93084	7.34	7.7	15.98	6.92	5.46	3.97	10.37	5.86	6.99	6.95	5
mml-miR-1255a-3p	-0.0617211	3.18928	0.872419	0.93084	8.75	9.1	8.89	11.3	6.05	5.59	9.88	12.18	7.07	9.43	9.74
mml-miR-423-5p	-0.0426629	12.1163	0.899247	0.954269	4381.2	4512.72	2961.73	4195.78	3784.97	6750.65	3143.03	3070.24	4811.48	5970.77	5268.24
mml-miR-99a-5p	-0.0518198	4.79854	0.902363	0.954269	27.12	28.16	16.21	23.45	17.17	21.97	9.88	31.39	58.13	26.99	43.06
mml-miR-30d-3p	0.0311209	3.35267	0.945697	0.986709	10.1	9.86	12.94	13.56	13.5	8.57	8.78	8.2	7.33	7.31	9.74
mml-miR-877-3p	-0.0167652	3.64101	0.960768	0.986709	12.19	12.33	6.41	8.76	6.65	10.55	15.13	16.98	10.74	19.69	15.38
mml-miR-320a	0.0215594	11.6034	0.964553	0.986709	3131.96	3085.53	1599.59	2789.23	3224.41	3633.67	1924.7	2029.89	3494.83	4226.61	5078.96
mml-miR-1262-3p	-0.0200403	3.80396	0.965248	0.986709	13.67	13.87	7.76	12.43	3.57	13.04	6.83	3.4	10.06	35.48	31.27
mml-miR-1304	0.0229722	5.56495	0.966026	0.986709	47.45	46.69	55.03	65.82	75.43	67.66	22.69	33.96	27.36	45.97	30.12
mml-miR-362-5p	-0.0127596	4.66233	0.966674	0.986709	24.98	25.22	21.49	16.95	22.53	18.12	28.67	31.15	31.28	25.46	30.12
mml-miR-421	0.0165522	6.36325	0.966915	0.986709	82.52	81.58	73.37	96.76	83.47	82.43	75.75	64.53	86	70.61	105.98
mml-miR-99b-5p	0.0190279	5.86353	0.967064	0.986709	58.32	57.57	66.06	59.18	36.03	49.66	39.89	53.05	94.01	62.48	61.51
mml-miR-323a-3p	0.0188363	5.12772	0.970859	0.986709	34.93	34.47	60.09	35.03	23.03	32.77	32.32	18.62	44.32	39.96	26.4
mml-miR-500a-3p	0.015147	4.79472	0.974324	0.986709	27.64	27.37	33.99	23.16	30.77	27.44	29.64	19.09	29.66	24.99	28.96
mml-miR-1240	-0.00537805	3.92424	0.983676	0.987023	14.93	14.99	7.88	11.3	9.03	21.1	17.93	15.23	15.17	21.22	15.76
mml-miR-24-3p	-0.00374131	9.71353	0.984312	0.987023	838.38	840.56	1088	636.75	1133.92	797.12	869.59	627.99	716.8	834.83	849.14
mml-miR-30e-5p	0.00837111	10.452	0.987023	0.987023	1404.12	1395.97	1485.59	1919	1199.43	973.28	1458.01	1810.29	1319.13	1125.05	1314.72

## Sheet: B. DE_miRNA_Grp4_Grp3
DE_miRNA_Group4_vs_Group3_1
names	logFC	logCPM	PValue	FDR	Group4	Group3	Group4:1	Group3:6	Group3:8	Group4:12	Group3:5	Group4:16	Group4:23	Group3:25	Group4:28
mml-miR-584-3p	-1.36499	4.8583	0.000242376	0.0572006	16.94	43.61	14.06	25.01	31.28	22.28	54.42	16.58	15.5	63.72	16.27
mml-miR-204-5p	-1.53054	4.46095	0.000853399	0.100701	11.85	34.3	13.54	41.05	20.99	5.28	54.69	10.52	6.88	20.48	23.04
mml-let-7f-5p	1.3335	12.8919	0.00189667	0.121121	10384.4	4120.59	9044.61	5192.86	4873.9	20712.5	3778.33	5126.45	8218.15	2637.26	8820.51
mml-miR-155	1.05821	8.08818	0.00262599	0.121121	353.54	169.77	349.85	165.59	205.2	499.06	171.34	227.62	347.64	136.94	343.53
mml-miR-7	1.27748	10.9742	0.00347123	0.121121	2722.15	1122.96	1863.35	1996.35	1107.92	3878.14	551.73	1529.15	3397.18	835.85	2942.95
mml-miR-98	1.14247	6.36904	0.00382215	0.121121	108.86	49.3	102.48	50.37	66.57	188.94	43.04	61.98	110.52	37.21	80.39
mml-let-7g-5p	1.21132	12.2845	0.00405658	0.121121	6673.92	2882.28	7471.69	3763.64	3687.24	12199.3	1980.87	3597.05	5287.25	2097.38	4814.32
mml-miR-301a-3p	1.32646	3.46412	0.00410579	0.121121	14.69	5.87	11.37	9.66	7.49	25.24	2.19	9.4	12.93	4.15	14.51
mml-let-7i-5p	1.16719	13.2488	0.00523576	0.125485	12918.2	5752.33	13298.3	6573.61	9330.32	21152.5	3035.93	8424.99	10685.8	4069.47	11029.6
mml-let-7a-5p	1.0518	14.8626	0.00586734	0.125485	38693.3	18664.3	38008.4	19277.9	20890.5	69601.5	18418.7	23154.6	32839.4	16070.1	29862.7
mml-miR-190b	1.06226	4.80588	0.00601038	0.125485	36.06	17.26	54.43	17.77	27.14	33.1	12.75	27.96	32.09	11.38	32.75
mml-miR-382-5p	1.49718	5.8934	0.00650332	0.125485	83	29.42	65.93	57.78	31.41	189.45	15.49	32.91	83.07	12.98	43.63
mml-miR-93-5p	1.07211	15.2115	0.00779408	0.125485	49472.8	23530.4	45099.2	29482.2	32504.1	86760.9	14618.9	33119	38557.1	17516.4	43828
mml-miR-20b-5p	1.0623	4.45802	0.0080584	0.125485	28.25	13.55	26.45	20.7	18.71	31.3	7.81	27.71	29.6	6.96	26.18
mml-let-7d	0.954186	11.5308	0.00887992	0.125485	3769.13	1945.35	3650.81	1789.02	2227.08	6056.5	1507.69	2509.29	3566.31	2257.62	3062.75
mml-miR-196b-5p	1.22509	3.88207	0.00897819	0.125485	19.43	8.32	17.76	12.94	9.09	40.31	5.62	8.66	17.66	5.62	12.75
mml-miR-454-3p	0.939704	8.79186	0.00944522	0.125485	562.65	293.33	601.44	328.76	412.26	748.92	224.39	393.14	532.77	207.89	536.96
mml-miR-15a-5p	1.13721	10.9984	0.0100889	0.125485	2699.94	1227.51	3060.36	1898.55	1526.34	4584.04	556.8	1468.41	2421.51	928.35	1965.4
mml-let-7e-5p	1.0374	4.85861	0.0104492	0.125485	37.25	18.14	31.94	23.29	18.58	70.71	13.84	21.03	31.17	16.87	31.37
mml-miR-877-3p	-1.05605	3.75527	0.0106344	0.125485	8.98	18.65	7.67	9.83	12.97	6.44	17.27	12.99	7.3	34.54	10.49
mml-miR-20a-5p	1.05773	6.80375	0.0142882	0.160572	144.95	69.62	241.62	88.31	95.71	188.55	32.35	91.42	106.87	62.11	96.27
mml-miR-101-3p	1.27734	9.45141	0.0155464	0.16677	947.13	390.75	846.9	713.23	503.97	2086.02	144.89	488.03	678.61	200.93	636.08
mml-let-7b-5p	0.987707	12.2556	0.0175437	0.16887	6271.63	3162.63	5141.44	3190.13	3170.84	12863.9	2174.83	3936.38	4859.03	4114.72	4557.46
mml-miR-379-5p	1.28748	3.83406	0.0179767	0.16887	18.98	7.8	15.46	17.77	6.28	39.41	2.88	11.01	18.74	4.28	10.29
mml-miR-16-5p	0.98697	16.9111	0.0191384	0.16887	158045	79739.6	155586	111265	89473.6	303473	66337.8	83569.1	115896	51882.1	131702
mml-miR-1260b	-0.844958	5.66104	0.0198861	0.16887	37.22	66.81	44.21	37.6	57.75	35.03	63.74	41.07	32.25	108.16	33.53
mml-miR-29c-3p	1.07398	8.96414	0.0200589	0.16887	651.1	309.29	585.34	516.42	356.92	1254.81	124.33	397.1	459.23	239.48	559.02
mml-miR-199a-3p	1.07624	4.90952	0.0201213	0.16887	38.9	18.44	49.7	22.94	25.67	72.38	10.42	15.09	28.77	14.73	28.53
mml-miR-122a-5p	1.79022	6.2826	0.0207509	0.16887	113.48	32.8	394.7	42.26	41.04	97.88	9.87	34.27	27.11	38.02	13.43
mml-let-7b-3p	-0.972607	5.95962	0.0216508	0.170319	43.42	85.25	26.83	76.41	63.23	15.71	103.77	73.98	40.79	97.59	59.8
mml-let-7c-5p	0.884392	7.08329	0.0236921	0.176307	169.97	92.06	145.79	82.97	100.53	309.23	80.19	93.52	177.01	104.55	124.31
mml-miR-26b-3p	-0.755863	6.21527	0.023906	0.176307	56.72	95.78	46.89	96.59	80.47	51.39	105	70.02	41.37	101.07	73.92
mml-miR-16-2-3p	-0.873242	6.89877	0.0274695	0.190012	86.95	159.27	78.45	97.63	225.51	39.8	156.27	146.22	85.4	157.69	84.9
mml-miR-330-5p	-0.888629	3.3934	0.0276403	0.190012	7.46	13.8	6.13	7.07	10.96	5.41	20.42	11.38	5.47	16.73	8.92
mml-miR-26b-5p	0.962249	11.0066	0.0284173	0.190012	2625.11	1347.33	1973.11	1345.73	1727.65	5784.24	1415.57	1433.52	2123.37	900.37	1811.28
mml-miR-92b-3p	-1.00656	7.72361	0.0289848	0.190012	145.76	292.86	103.88	177.83	119.64	72.12	410.68	222.43	107.53	463.3	222.84
mml-miR-1249	-1.18274	6.98592	0.0324043	0.204808	80.89	183.61	65.93	102.63	80.47	28.08	185.87	204.24	72.46	365.45	33.73
mml-miR-432-5p	1.09674	5.22988	0.0334559	0.204808	48.82	22.85	31.18	43.64	21.39	109.34	10.83	21.77	50.24	15.53	31.57
mml-miR-493-5p	1.2503	3.10215	0.0338454	0.204808	11.24	4.73	10.35	8.97	4.81	28.21	2.33	4.08	10.11	2.81	3.43
mml-miR-106b-5p	0.855656	6.20717	0.040318	0.231873	91.91	50.79	119.85	65.54	62.03	136.65	20.29	66.18	71.88	55.29	65
mml-miR-190a-5p	1.68297	6.1452	0.0407093	0.231873	101.47	31.62	90.59	72.27	5.75	18.16	22.89	7.79	318.95	25.57	71.86
mml-miR-126	1.10133	9.97546	0.0412655	0.231873	1319.62	615.06	1642.81	1041.3	818.91	2648.58	374.49	390.79	1124.82	225.56	791.08
mml-miR-103-3p	0.789112	12.5676	0.0456282	0.24764	7468.72	4322.13	7144.97	4546.9	5677.17	13770.4	3077.06	4747.78	6539.09	3987.41	5141.38
mml-miR-106a-5p	0.787959	5.92168	0.0464216	0.24764	74.25	43	75.64	54.16	59.49	117.97	22.89	50.97	66.49	35.47	60.2
mml-miR-197-3p	-0.726277	11.751	0.047694	0.24764	2670	4417.13	2688.02	2691.64	2906.16	2158.27	5082.73	3268.23	2282.23	6987.98	2953.24
mml-miR-7180-5p	-0.911674	6.92523	0.0486236	0.24764	87.16	163.97	65.93	66.23	124.99	38.89	148.86	155.25	85.15	315.79	90.59
mml-miR-296-5p	-0.647145	10.2577	0.0493182	0.24764	977.98	1531.55	1122.25	1060.96	1386.78	924.2	1892.32	1089.99	829.75	1786.15	923.73
mml-miR-15b-3p	-0.750936	11.5392	0.0518432	0.250714	2283	3842.04	1993.56	3780.37	3062.43	1084.03	4861.36	3393.8	1605.86	3664	3337.75
mml-miR-23a-3p	-0.62413	11.5034	0.052055	0.250714	2339.97	3606.56	1883.8	3155.63	3586.58	1958.9	3472.52	2893.15	2407.5	4211.5	2556.48
mml-miR-130b-3p	0.717322	4.91009	0.0553956	0.260467	36.12	21.93	40.89	18.46	26.74	58.73	21.93	27.09	23.21	20.62	30.69
mml-miR-17-5p	0.725046	8.28998	0.0568771	0.260467	379.34	229.49	377.58	288.74	308.4	603.13	152.43	271.17	332.38	168.4	312.45
mml-miR-21-5p	0.776078	9.04744	0.0573911	0.260467	648.84	378.9	738.29	537.98	337.4	970.82	168.6	500.77	627.37	471.6	406.96
mml-miR-486-5p	-0.704902	17.3152	0.0613587	0.269479	127400	207666	162994	140309	133200	83082.1	250414	150664	92307.5	306742	147952
mml-miR-23b-3p	-0.599977	9.95653	0.0616605	0.269479	808.15	1224.91	782.12	1029.57	1416.45	621.41	1252.73	1008.59	840.11	1200.9	788.53
mml-miR-491-5p	-0.700218	7.64311	0.0633822	0.271967	156.29	253.89	174.41	131.43	240.22	124.54	246.19	220.32	150.98	397.71	111.18
mml-miR-664	-0.720458	3.41572	0.0666529	0.280894	8.1	13.35	8.31	6.73	15.24	3.86	15.49	9.9	8.62	15.93	9.8
mml-miR-18b	0.713524	4.43953	0.0693092	0.284789	25.95	15.82	27.98	20.7	22.86	34.64	8.36	26.1	22.3	11.38	18.73
mml-miR-6529-3p	-0.751302	5.11068	0.0703197	0.284789	26.32	44.31	19.68	24.67	41.97	13.27	69.63	40.2	20.23	40.96	38.24
mml-miR-151-3p	-0.71124	10.4455	0.0717601	0.284789	1086.5	1778.83	698.68	1305.72	1733	929.09	2893.79	1445.9	712.27	1182.82	1646.57
mml-miR-500a-5p	-0.673334	3.93098	0.0724039	0.284789	11.89	18.93	14.57	11.21	20.32	7.99	18.23	16.08	12.19	25.97	8.63
mml-miR-10a-5p	-0.573564	6.0583	0.0765891	0.29041	54.56	81.22	46.51	77.79	84.62	42.63	78	64.7	51.82	84.47	67.16
mml-miR-636	-0.748947	4.44012	0.0778396	0.29041	16.5	27.69	17.38	11.9	19.38	10.69	33.31	24.25	10.86	46.18	19.31
mml-miR-221-3p	0.72211	11.5183	0.0780184	0.29041	3555.22	2155.17	4304.13	1308.82	3334.73	5335.79	1629.41	2786.39	3587.12	2347.71	1762.65
mml-miR-18a-3p	-0.808946	9.57863	0.0787553	0.29041	572.94	1003.73	677.21	370.15	752.21	262.35	897.7	901.09	541.89	1994.84	482.16
mml-miR-34a-5p	0.839305	6.64962	0.0805004	0.292278	124.56	69.61	62.48	67.44	100.39	269.43	29.33	68.66	123.04	81.26	99.22
mml-miR-423-3p	-0.687361	12.7096	0.0830091	0.295134	5268.82	8484.54	6252.71	4769.23	5339.63	4360.72	8297.82	7175.66	4566.69	15531.5	3988.34
mml-miR-324-5p	-0.639359	7.74986	0.083788	0.295134	172.32	268.39	162.79	165.24	209.34	141.93	397.38	200.78	114.33	301.6	241.77
mml-miR-484	-0.752241	13.8075	0.0866531	0.300737	10993.2	18517	14201.3	6498.41	23025	5519.19	15256.8	16570	9935.19	29288	8740.51
mml-miR-28-3p	-0.600847	7.75166	0.0891152	0.301326	175.09	265.54	123.81	215.78	184.88	230.53	403.27	165.89	163.25	258.22	191.96
mml-miR-340-3p	-0.582137	6.9294	0.0893764	0.301326	99.64	149.19	97.37	162.31	137.69	60.27	165.59	113.32	87.22	131.19	140
mml-miR-200c-3p	0.743349	3.27769	0.0945135	0.311197	11.5	6.87	9.58	8.45	7.22	22.15	7.13	4.33	10.86	4.69	10.59
mml-miR-130b-5p	-0.620991	6.0334	0.0949415	0.311197	52.69	80.99	67.21	48.81	80.47	36.45	70.46	71.38	45.27	124.23	43.14
mml-miR-130a-3p	0.657796	3.66012	0.102268	0.330619	14.81	9.37	15.21	10	11.36	26.4	8.09	7.55	13.02	8.03	11.86
mml-miR-532-3p	-0.56728	9.63365	0.103746	0.330865	654.1	969.17	686.16	684.94	783.62	588.83	1465.19	750.91	468.43	942.94	776.18
mml-miR-1226	-0.603542	7.99732	0.109013	0.337021	207.4	315.14	143.36	213.54	217.09	152.49	439.6	262.38	175.35	390.35	303.43
mml-miR-374a-5p	0.735202	6.50766	0.109887	0.337021	110.32	66.3	133.78	128.85	55.21	184.81	29.33	62.35	93.02	51.81	77.65
mml-miR-331-3p	-0.59485	11.6504	0.10996	0.337021	2620.09	3957.16	2367.94	2717.69	3166.16	1967.66	5395.54	3209.72	1600.63	4549.24	3954.52
mml-miR-7204-3p	-0.562414	6.2697	0.115604	0.349775	63.48	93.73	54.69	67.79	102	40.44	105	92.66	48.92	100.13	80.69
mml-miR-30d-3p	0.592748	3.18875	0.119228	0.352018	10.43	6.93	9.84	10.35	5.48	14.17	4.66	9.77	9.53	7.23	8.82
mml-miR-369-5p	0.687456	4.01643	0.119328	0.352018	19.13	11.93	17.76	23.63	9.22	22.67	5.35	14.6	27.11	9.5	13.53
mml-miR-363-3p	0.625163	4.61452	0.121633	0.354389	28.73	18.64	36.16	27.77	19.65	15.84	10.55	41.44	27.86	16.6	22.35
mml-miR-942-5p	-0.564166	11.3037	0.129758	0.363858	2084.31	3081.68	2327.69	1695.19	2586.94	1617.87	4064.13	3015.62	1426.94	3980.45	2033.43
mml-miR-29c-5p	-0.578532	6.2688	0.130812	0.363858	63.05	94.14	55.58	55.89	82.61	35.16	111.3	93.28	50.16	126.77	81.08
mml-miR-29b-2-5p	0.560955	4.26612	0.130831	0.363858	22.18	15	18.4	12.42	17.78	37.86	15.49	18.06	17.74	14.32	18.82
mml-miR-92a-3p	-0.557461	16.8569	0.133114	0.363858	98125	144408	138143	89624	105812	107602	153542	96139.7	77144.9	228655	71596
mml-miR-146a-5p	0.577447	7.82426	0.13453	0.363858	265.3	177.76	240.6	170.59	200.52	510.91	168.6	189.4	208.43	171.35	177.16
mml-miR-500b-5p	-0.54852	3.65225	0.136119	0.363858	10.25	14.96	12.52	9.66	14.84	7.86	16.59	13.73	10.36	18.74	6.76
mml-miR-370-3p	0.798068	4.94015	0.139161	0.363858	37.56	21.61	33.99	38.46	19.65	93.63	14.26	12.99	31.59	14.06	15.59
mml-miR-335-3p	-0.742001	4.61766	0.140231	0.363858	18.72	31.3	21.72	16.73	20.32	5.8	14.94	25.24	18.57	73.22	22.25
mml-miR-148a-5p	-0.590058	3.38314	0.142218	0.363858	8.32	12.53	7.67	8.62	11.23	6.44	6.85	7.55	10.61	23.43	9.31
mml-miR-152-3p	0.615795	3.12068	0.142808	0.363858	9.98	6.52	13.54	8.11	5.61	12.75	7.68	3.59	10.03	4.69	10
mml-miR-424-5p	0.69778	5.94828	0.143224	0.363858	74.15	45.71	74.75	65.2	36.9	144.12	24.13	70.51	59.53	56.62	21.86
mml-miR-324-3p	-0.49894	7.50131	0.145658	0.363858	152.89	216.03	140.04	135.92	192.23	140	261.4	181.73	120.8	274.56	181.86
mml-miR-30d-5p	-0.473546	13.1107	0.14659	0.363858	7542.46	10472.8	7167.97	9328.38	9426.71	7935.68	12547.1	8656.2	5149.79	10589.1	8802.66
mml-miR-30c-5p	-0.53416	13.6631	0.146748	0.363858	10817.1	15664.3	9014.71	13353.7	12389.7	6687.96	21598.5	12639	8323.86	15315.4	17420.2
mml-miR-107-3p	0.564701	7.95212	0.14801	0.363858	289.01	195.38	313.31	203.19	265.08	492.49	131.45	204.86	260.66	181.79	173.73
mml-miR-6827-3p	-0.492233	4.28273	0.151168	0.36779	16.26	22.92	13.67	21.04	19.65	12.49	28.37	13.86	20.81	22.62	20.49
mml-miR-505-3p	-0.524332	6.14322	0.154753	0.37267	58.96	84.82	39.35	94.52	40.91	64.65	85.12	69.15	66.24	118.74	55.39
mml-miR-186-5p	-0.503974	11.7159	0.16408	0.391139	2836.59	4022.61	2530.6	3501.29	3340.08	1640.92	4131.43	4051.67	2130.92	5117.63	3828.83
mml-miR-339-3p	-0.494842	9.5379	0.171152	0.399249	628.79	886.04	964.71	705.64	725.74	444.46	874.26	746.7	539.57	1238.51	448.53
mml-miR-93-3p	-0.60948	10.9667	0.171999	0.399249	1622.04	2474.74	1790.39	1044.57	2661.8	564.49	3161.49	2843.42	1195.63	3031.09	1716.28
mml-miR-671-3p	-0.500677	7.86238	0.172682	0.399249	196.29	277.7	204.7	167.83	180.33	162.66	389.29	245.56	153.05	373.35	215.49
mml-miR-187-5p	-0.605908	5.44849	0.174427	0.399249	35.26	53.71	39.1	93.49	42.24	14.42	22.89	52.82	44.85	56.22	25.1
mml-miR-339-5p	-0.453307	14.3103	0.176285	0.399249	17452.2	23895.2	21571.1	19366.2	19762.2	13153.4	27706.4	21856.7	14537.2	28745.9	16142.9
mml-miR-191-3p	-0.447754	6.48279	0.177746	0.399249	76.79	104.74	50.73	107.98	127.4	89.38	87.59	89.44	73.79	95.98	80.59
mml-miR-151-5p	-0.455369	6.51312	0.180577	0.399249	78.2	107.23	50.73	100.21	125.12	84.1	119.39	87.59	66.24	84.2	102.35
mml-miR-142-3p	-0.529342	13.7709	0.181213	0.399249	11677.5	16853.8	11846.1	24951.6	12054.1	7682.22	7838.49	15994.4	9192.33	22570.8	13672.3
mml-miR-128a-3p	-0.480588	12.0761	0.182707	0.399249	3672.29	5123.99	2724.05	4301.63	4194.41	2703.31	7089.51	5309.41	2729.27	4910.41	4895.4
mml-miR-340-5p	0.587549	7.09942	0.190568	0.411857	160.78	107.01	133.27	160.93	151.19	237.49	33.72	126.06	198.73	82.19	108.33
mml-miR-627-5p	0.443026	6.23902	0.191967	0.411857	85.31	62.75	69.51	68.65	55.61	113.21	72.92	79.05	68.4	53.81	96.37
mml-miR-503-5p	0.642448	7.00135	0.193795	0.412033	152.21	97.47	126.11	75.03	87.02	350.05	103.08	141.65	105.87	124.76	37.35
mml-miR-30e-3p	-0.424659	8.43472	0.199576	0.416143	300.14	402.86	267.56	383.09	294.09	263.51	503.75	363.95	246.16	430.51	359.51
mml-miR-378a	0.486285	6.83754	0.199681	0.416143	130.76	93.31	121	64.51	114.43	226.93	82.11	94.76	112.59	112.18	98.53
mml-miR-128b-3p	-0.472056	11.8595	0.201018	0.416143	3170.28	4397.44	2448.06	3590.29	3488.46	2173.6	6177.55	4708.56	2234.88	4333.45	4286.28
mml-miR-582-3p	-0.99142	2.90576	0.208266	0.427399	5.05	10.1	1.15	21.39	9.22	1.42	0.41	5.57	1.16	9.37	15.98
mml-miR-431	0.578515	4.67222	0.211429	0.429307	29.58	19.82	25.68	30.19	24.73	42.11	6.58	27.09	40.38	17.8	12.65
mml-miR-138-5p	0.563968	3.01222	0.212834	0.429307	9.11	6.16	7.79	5.69	11.23	10.56	3.98	8.41	14.67	3.75	4.12
mml-miR-1306-5p	-0.476227	7.7481	0.215616	0.431233	182.96	254.5	162.66	174.21	147.98	187.39	381.34	205.35	105.87	314.45	253.53
mml-miR-150-5p	-0.393867	14.4242	0.219638	0.435585	19293.2	25349.5	18067.9	18547.8	27638.1	23965.6	28106.5	18402.1	17865.7	27105.5	18164.4
mml-miR-1271-5p	-0.566712	7.36145	0.221647	0.435905	135.32	200.38	120.11	174.56	136.08	159.06	337.62	277.72	60.19	153.27	59.51
mml-miR-148b-3p	0.458902	9.35958	0.224815	0.436678	747.15	543.58	399.17	648.55	467.87	1162.33	382.16	701.79	695.27	675.75	777.16
mml-miR-361-5p	-0.408286	11.5595	0.225786	0.436678	2635.02	3496.93	2165.16	2226.97	3437	2493.9	4295.92	3485.34	2521.09	4027.84	2509.61
mml-miR-361-3p	-0.444369	11.7835	0.227591	0.436678	3037.95	4133.77	2599.85	2310.28	4714.82	2588.3	6327.24	3735.35	2386.03	3182.75	3880.2
mml-let-7i-3p	-0.400567	4.60163	0.239226	0.454129	21.08	27.77	25.04	22.25	31.55	23.18	28.37	24.74	14.18	28.91	18.24
mml-miR-199a-5p	0.586791	3.75265	0.243536	0.454129	15.48	10.33	7.92	10.69	10.69	4.64	10.28	11.88	14.84	9.64	38.14
mml-miR-660-5p	0.421757	5.46816	0.244849	0.454129	49.6	37.04	44.85	48.99	43.98	58.08	19.05	53.07	46.43	36.14	45.59
mml-let-7f-3p	-0.562906	5.52373	0.245064	0.454129	37.75	55.8	19.93	63.99	51.2	8.11	45.1	52.95	31.75	62.92	75.98
mml-miR-32-5p	0.537239	3.73236	0.246307	0.454129	15.15	10.45	25.43	17.08	8.02	18.29	3.7	11.5	9.37	12.98	11.18
mml-miR-1296-5p	-0.398549	7.12564	0.256715	0.469648	122.14	161.01	73.98	156.79	155.07	125.83	116.38	170.35	110.85	215.79	129.71
mml-miR-140-5p	0.42006	6.21415	0.259767	0.471578	83.36	62.31	79.35	90.04	72.45	114.37	34.54	84.12	64.83	52.21	74.12
mml-miR-425	-0.426496	14.445	0.264954	0.477322	19346.6	26001.1	24219.4	14154.2	24466.3	10455.9	27957.2	27023.5	16027.1	37426.8	19007.2
mml-miR-187-3p	0.415595	9.54337	0.268571	0.480173	839.27	629.23	789.14	884.85	762.63	974.04	297.45	712.93	1019.36	572	700.88
mml-miR-1240	-0.449328	3.8449	0.279065	0.492268	12.15	16.59	9.58	9.49	11.76	9.27	28.65	13.48	8.04	16.47	20.39
mml-miR-3200-3p	-0.395619	7.52688	0.279508	0.492268	161.55	212.49	97.24	156.79	179.8	198.85	206.16	207.21	112.67	307.22	191.77
mml-miR-140-3p	-0.355209	13.2348	0.285386	0.498896	8575.41	10969.4	7851.31	10016.8	10623.5	7747.91	12481.9	10281.6	5641.43	10755.5	11354.8
mml-miR-378d	0.412376	4.18575	0.293519	0.509341	20.2	15.14	20.57	10.18	17.78	35.16	13.98	16.08	16.75	18.61	12.45
mml-miR-30b-5p	-0.374957	10.6451	0.310453	0.534794	1414.54	1834.42	1122.89	2202.13	1477.41	813.83	1858.46	1695.79	1070.6	1799.67	2369.61
mml-miR-210-3p	0.402696	9.00204	0.313271	0.535739	574.7	434.72	541.77	552.64	603.56	1000.19	324.73	452.15	472.33	257.96	407.06
mml-miR-338-3p	0.489563	4.52316	0.319637	0.542692	26.09	18.59	13.29	31.39	14.04	55.64	7.13	16.82	21.56	21.82	23.14
mml-miR-15b-5p	0.448244	13.4536	0.324844	0.547595	12729.5	9329.85	11420	11048.1	10207.6	29672.9	7456.87	6635.68	9583.32	8606.8	6335.4
mml-miR-181b-5p	0.417804	5.63654	0.335516	0.561572	55.74	41.68	61.97	19.32	54.27	87.58	32.62	44.04	59.61	60.51	25.49
mml-miR-134-5p	0.400773	5.14791	0.339831	0.56479	39.46	29.9	32.71	41.4	39.3	70.96	20.56	25.36	41.62	18.34	26.67
mml-miR-4766-3p	-0.384805	4.71452	0.355437	0.586595	22.91	29.91	18.4	27.25	24.2	8.76	25.36	40.95	18.49	42.84	27.94
mml-miR-329-3p	-0.369533	3.19905	0.374664	0.613812	7.91	10.25	8.31	12.07	12.03	3.22	6.44	10.89	12.02	10.44	5.1
mml-miR-125a-5p	-0.309683	8.77969	0.380544	0.613812	396.99	492.06	413.61	385.16	407.32	333.95	716.49	246.3	486.18	459.29	504.9
mml-miR-628-3p	0.336037	3.39059	0.381261	0.613812	11.28	8.93	8.56	9.14	6.95	17.77	9.73	7.18	11.61	9.91	11.27
mml-miR-1262-3p	0.495096	3.46188	0.385865	0.613812	12.32	8.74	7.79	5.69	3.74	8.89	4.25	4.95	13.02	21.28	26.96
mml-miR-27a-3p	-0.350021	6.33585	0.387425	0.613812	71.78	91.52	49.45	138.85	86.89	93.24	30.98	70.02	62.68	109.37	83.53
mml-miR-337-5p	0.5501	2.37591	0.388532	0.613812	5.75	3.96	4.47	10.35	3.21	10.56	0.55	2.35	8.04	1.74	3.33
mml-miR-199a	0.434596	3.95024	0.391846	0.613812	17.15	12.71	9.2	12.94	12.83	5.02	12.75	13.11	15.17	12.32	43.24
mml-miR-191-5p	-0.317297	16.6448	0.392735	0.613812	92368.2	115090	70459.9	85847.4	93376.4	98048.7	177796	88425.5	59090.7	103341	145816
mml-miR-7180-3p	-0.296478	4.43114	0.408891	0.634856	19.38	23.77	12.52	16.04	26.74	25.11	21.79	23.75	19.23	30.52	16.27
mml-miR-185-5p	0.289865	11.6589	0.416815	0.639024	3517.82	2877.47	2674.22	1840.6	3509.58	4221.88	2312.04	3535.94	3023.43	3847.66	4133.63
mml-miR-29a-3p	0.357578	7.60749	0.41699	0.639024	215.85	168.45	168.28	204.91	186.08	449.09	78.68	146.47	177.18	204.14	138.24
mml-miR-3122	0.290543	3.79371	0.435106	0.654389	14.83	12.09	13.54	7.93	18.45	17.52	12.89	17.07	13.68	9.1	12.35
mml-miR-19b	-0.264256	12.3349	0.435763	0.654389	4742.31	5695.63	3933.07	6726.43	5399.92	3316.61	4607.63	5400.58	4200.4	6048.52	6860.89
mml-miR-7205-3p	0.352071	5.42618	0.436349	0.654389	47.29	37.06	40.63	42.09	25	27.05	64.43	61.85	31.34	16.73	75.59
mml-miR-133c-3p	-0.452058	3.21378	0.438108	0.654389	7.74	10.64	7.16	14.83	4.95	1.03	13.16	1.98	10.7	9.64	17.84
mml-miR-654-3p	-0.290514	8.15068	0.445826	0.659377	258.33	316.02	232.81	587.31	270.16	202.97	213.56	325.47	289.02	193.03	241.37
mml-miR-296-3p	-0.280588	4.01672	0.447492	0.659377	14.56	17.7	7.28	19.49	14.84	18.29	13.16	17.57	13.68	23.29	15.98
mml-miR-181a-5p	0.337426	6.91045	0.449829	0.659377	132.33	104.69	133.14	54.33	133.01	242.9	72.79	85.36	133.57	158.63	66.67
mml-miR-148b-5p	0.278608	4.01067	0.45623	0.664631	17.22	14.19	15.33	14.14	8.29	22.15	13.16	15.96	13.35	21.15	19.31
mml-miR-30e-5p	-0.239641	10.3764	0.459135	0.66476	1230.26	1452.57	1297.18	1716.92	1394.53	1190.41	1256.15	1386.39	842.02	1442.65	1435.3
mml-miR-19a-3p	0.273634	7.12278	0.462191	0.665104	150.68	124.68	139.28	191.29	133.68	171.29	63.47	125.07	144.84	110.3	172.94
mml-miR-7186-3p	-0.274797	6.20619	0.465742	0.666152	67.33	81.46	65.68	97.8	48.12	41.86	108.7	109.23	53.39	71.22	66.47
mml-miR-6790-3p	-0.29053	4.26895	0.472704	0.668429	17.32	21.17	10.22	11.21	19.12	12.62	28.51	28.7	14.09	25.84	20.98
mml-miR-362-5p	-0.265594	4.53029	0.472998	0.668429	20.98	25.21	17.25	15.18	22.46	19.83	23.03	26.97	24.79	40.16	16.08
mml-miR-148a-3p	0.294747	9.43561	0.484396	0.680461	754.14	614.82	441.21	992.66	601.68	985.76	282.65	482.46	834.39	582.31	1026.86
mml-miR-29b-3p	0.250119	8.04111	0.494263	0.690214	283.19	238.12	260.02	280.29	153.33	348.89	239.61	236.9	179.25	279.24	390.88
mml-miR-491-3p	-0.256923	3.81042	0.511088	0.708304	12.68	15.18	11.5	16.39	17.91	5.92	12.75	15.22	9.2	13.65	21.57
mml-miR-26a-5p	0.234649	11.9846	0.51322	0.708304	4341.96	3690.17	5644.62	3709.31	3356.39	6406.3	3758.04	3113.48	3561.59	3936.94	2983.83
mml-miR-181a-3p	-0.248938	4.06902	0.517136	0.709558	15.25	18.15	10.73	17.94	23.13	10.82	8.36	19.42	20.48	23.16	14.8
mml-miR-424-3p	0.31583	4.91535	0.528378	0.720793	32.82	26.33	34.63	15.87	19.78	62.21	25.36	32.41	27.61	44.31	7.25
mml-miR-376a-3p	0.293933	4.35956	0.537252	0.728687	22.08	18.07	18.91	41.22	13.64	24.6	5.89	19.79	26.03	11.51	21.08
mml-miR-133d-3p	-0.372771	4.26873	0.543384	0.729828	16.8	21.81	12.65	35.7	9.22	2.45	23.85	3.83	21.56	18.47	43.53
mml-miR-502-3p	-0.211393	4.71994	0.546854	0.729828	24.41	28.24	23.38	22.42	31.41	21.38	21.38	32.41	27.61	37.75	17.25
mml-miR-494-3p	-0.209958	5.677	0.547371	0.729828	47.6	55.1	45.74	76.07	58.28	40.44	55.65	48.49	60.36	30.39	42.94
mml-miR-423-5p	-0.201989	11.8867	0.555519	0.732426	3549.31	4082.67	3864.32	2849.47	3465.2	4590.87	3921.57	3064.98	2882.73	6094.43	3343.63
mml-miR-451	-0.229942	15.5179	0.556038	0.732426	43573	51101.8	56644.2	63683.9	42235.7	29371.8	20624.4	46696.3	39133.7	77863.4	46018.8
mml-miR-337-3p	-0.24316	3.2188	0.55863	0.732426	8.37	9.98	6.26	19.15	8.02	5.02	6.99	9.77	11.28	5.76	9.51
mml-let-7a-3p	-0.265001	6.80258	0.572701	0.746726	102.22	122.87	66.95	181.8	89.83	31.68	64.43	144.74	75.86	155.42	191.86
mml-miR-299-5p	-0.190176	6.6919	0.583338	0.756416	97.05	110.79	97.37	172.83	98.79	76.5	87.86	101.56	125.52	83.67	84.31
mml-miR-376c-3p	0.275237	3.29078	0.593446	0.765319	10.31	8.57	8.82	17.25	6.02	8.24	1.92	9.28	17	9.1	8.24
mml-miR-18a-5p	0.21546	3.61953	0.598269	0.767345	12.85	11.05	15.72	12.42	14.97	12.62	3.98	14.1	10.03	12.85	11.76
mml-miR-30c-1-3p	-0.170781	5.01509	0.601777	0.767672	30.41	34.2	27.86	26.74	38.1	37.99	38.52	29.69	26.61	33.47	29.9
mml-miR-222-3p	-0.19045	7.89789	0.615216	0.780596	224.23	255.82	352.41	125.91	278.85	252.94	304.85	198.67	167.72	313.64	149.41
mml-miR-342-3p	-0.168813	9.95704	0.638835	0.806231	941.78	1058.64	704.3	711.33	1359.24	1511.36	1163.77	999.93	867.22	1000.23	626.08
mml-miR-142-5p	-0.154638	12.6896	0.642837	0.806966	6289.61	7001.26	6141.42	8722.96	7006.47	4528.4	5327.55	5885.64	5913.54	6948.09	8979.04
mml-miR-99b-5p	-0.153062	5.98626	0.662997	0.827869	60.14	66.89	52.13	57.96	48.26	55.9	88.28	37.48	81.83	73.09	73.33
mml-miR-22	-0.132661	10.5788	0.670436	0.828516	1466.47	1607.69	1465.59	1692.78	1627.4	1692.18	1411.32	1668.94	1281.6	1699.27	1224.02
mml-miR-138-3p	-0.151696	3.03562	0.670536	0.828516	7.58	8.42	6.01	6.73	10.56	8.37	8.09	7.3	8.87	8.3	7.35
mml-miR-6529-5p	-0.153988	7.97787	0.677845	0.833185	239.85	266.85	167.77	146.1	192.5	228.47	299.1	302.09	222.69	429.7	278.24
mml-miR-30a-3p	0.165061	4.67306	0.6945	0.844824	26.51	23.69	15.08	33.81	23.66	31.17	14.67	15.09	31.42	22.62	39.8
mml-miR-1304	0.164593	5.61629	0.699722	0.844824	51.28	45.73	49.58	37.95	58.95	88.35	60.04	26.1	34.32	25.97	58.04
mml-miR-335-5p	0.182863	4.22558	0.704181	0.844824	19.47	17.17	12.14	17.94	10.29	14.81	5.89	18.8	23.55	34.54	28.04
mml-miR-652	-0.138227	8.07542	0.70467	0.844824	257.99	283.88	349.34	175.42	272.7	291.84	246.87	254.59	241.93	440.55	152.26
mml-miR-194-5p	0.128258	8.30962	0.71246	0.844824	329.49	301.47	250.18	322.72	263.61	312.19	349.4	375.58	248.81	270.14	460.69
mml-miR-144	-0.182618	6.41619	0.715196	0.844824	80.37	91.24	100.94	182.84	96.38	142.44	19.46	40.08	58.7	66.26	59.71
mml-miR-381-3p	-0.143851	5.09083	0.715265	0.844824	32.34	35.78	32.84	71.75	30.88	34.39	19.46	32.41	34.49	21.02	27.55
mml-miR-125b-5p	-0.142599	9.01549	0.715953	0.844824	494.43	545.8	461.65	269.42	578.96	356.49	854.8	293.81	733.41	480.04	626.77
mml-miR-182	0.162251	5.13198	0.720808	0.844919	36.56	32.65	22.62	25.53	36.49	66.33	53.05	25.61	24.71	15.53	43.53
mml-miR-7186-5p	0.146807	5.70662	0.725739	0.844919	54.34	49.05	67.72	47.26	40.91	93.12	58.12	45.9	44.11	49.93	20.88
mml-miR-365-3p	0.144791	3.66363	0.726774	0.844919	12.99	11.72	12.01	7.59	12.97	10.17	8.64	22.64	9.95	17.67	10.2
mml-miR-500a-3p	0.119579	4.63307	0.73921	0.855165	25.47	23.43	20.32	21.04	31.41	34.9	18.92	24.49	27.36	22.36	20.29
mml-miR-27b-3p	0.119149	8.21106	0.743212	0.8556	306.91	282.58	254.53	371.53	283.26	493.91	225.08	268.69	267.21	250.46	250.2
mml-miR-374b-5p	0.105003	6.94628	0.759441	0.870039	127.05	118.13	170.84	137.13	108.28	142.57	123.23	106.64	114.83	103.88	100.39
mml-miR-323b-3p	-0.0990302	6.43405	0.769979	0.875851	83.57	89.55	78.2	117.64	103.87	70.96	86.36	76.95	97.42	50.33	94.31
mml-miR-543-3p	-0.115979	3.32901	0.775725	0.875851	9.44	10.27	8.31	13.45	9.49	10.56	7.81	8.66	15.67	10.31	4.02
mml-miR-223	-0.094708	15.2346	0.779846	0.875851	37426.5	39965.9	24995.1	49505	38994.5	32807.1	30508.5	36832.4	35058.6	40855.6	57439.4
mml-miR-24-3p	-0.0889422	9.81557	0.781379	0.875851	876.13	931.82	706.98	898.13	1101.77	1159.63	737.05	952.05	812.26	990.33	749.71
mml-miR-532-5p	-0.0911529	7.05829	0.78307	0.875851	129.3	137.71	106.44	109.01	174.98	162.02	161.61	151.05	110.93	105.22	116.08
mml-miR-503-3p	-0.110082	5.7141	0.791541	0.88115	50.5	54.46	49.19	31.39	38.23	81.4	81.15	58.02	44.77	67.07	19.12
mml-miR-154-5p	-0.0877158	5.58098	0.79697	0.883028	46.32	49.28	41.78	79.69	38.37	39.15	38.24	52.58	51.73	40.83	46.37
mml-miR-99a-5p	-0.0988261	4.87898	0.81473	0.898488	28.26	30.27	30.54	13.28	30.61	15.84	26.18	20.91	51.07	51	22.94
mml-miR-409-5p	0.10083	3.75752	0.819534	0.899582	13.67	12.79	10.35	19.84	13.77	13.91	6.99	14.1	20.98	10.58	9.02
mml-miR-30a-5p	0.117521	6.66139	0.831924	0.908954	104.59	96.45	41.4	174.38	110.15	111.79	31.94	53.57	93.27	69.34	222.94
mml-miR-196a-5p	0.101173	7.84971	0.837879	0.911242	237.58	221.5	184.64	292.88	250.65	435.57	271.41	111.09	294.66	71.08	161.96
mml-miR-576-5p	-0.0730062	5.8981	0.861227	0.932337	58.04	61.06	47.15	50.37	87.83	19.45	40.71	69.4	44.77	65.33	109.41
mml-miR-1180-3p	-0.0619065	8.65268	0.869541	0.935955	394.54	411.8	449	233.03	378.58	482.45	280.32	407.74	407.41	755.26	226.08
mml-miR-487b-3p	0.0670359	3.66447	0.87677	0.935955	12.69	12.14	11.24	18.63	10.43	15.71	10.55	12.12	15.92	8.97	8.43
mml-miR-421	0.0540105	6.44432	0.879543	0.935955	88.28	85.03	68.74	78.14	64.97	99.04	107.6	86.6	78.68	89.42	108.33
mml-miR-323a-3p	-0.0504016	5.36638	0.880433	0.935955	40.36	41.84	32.07	64.16	37.16	48.3	36.32	37.11	49.91	29.72	34.41
mml-miR-485-3p	-0.045841	8.53485	0.888189	0.936758	365.39	377.23	342.06	520.73	281.12	336.53	462.76	333.76	441.65	244.3	372.94
mml-miR-671-5p	-0.0504343	4.46251	0.889126	0.936758	21.47	22.21	14.95	15.52	30.88	22.28	17.13	29.94	21.56	25.3	18.63
mml-miR-331-5p	-0.0366671	5.41742	0.918118	0.955415	42.05	43.08	47.92	32.43	36.09	68	53.6	38.23	26.78	50.2	29.31
mml-miR-192-5p	-0.0379212	9.12734	0.918303	0.955415	552.45	567.18	365.82	577.31	502.63	245.99	620.4	789.26	384.53	568.39	976.67
mml-miR-26a-2-3p	0.0493942	3.64375	0.91898	0.955415	12.44	12.04	15.21	16.21	10.43	6.44	10.01	12.87	8.46	11.51	19.22
mml-miR-320a	-0.0377986	11.3969	0.92333	0.955727	2664.85	2735.55	3449.18	1279.85	2217.58	3257.5	1470.95	2352.67	2358.42	5973.82	1906.47
mml-miR-106b-3p	-0.0189825	11.4114	0.950521	0.979333	2707.66	2743.47	3330.6	1766.95	3144.37	3367.1	2526.01	2802.47	2418.03	3536.56	1620.1
mml-miR-409-3p	0.0238913	9.8389	0.954435	0.979333	922.29	907.18	740.08	1342.29	848.72	1155.77	943.9	831.56	979.65	493.82	904.41
mml-miR-584-5p	0.0223161	9.26967	0.967677	0.988623	621.25	611.67	428.3	358.43	932.67	1263.18	569	482.09	614.52	586.59	318.14
mml-miR-320b	-0.00626035	5.32282	0.98269	0.994395	39.71	39.85	47.53	17.59	28.87	48.43	20.84	36.37	38.88	92.1	27.35
mml-miR-1255a-3p	-0.00604545	3.22741	0.98726	0.994395	9.09	9.15	7.67	9.31	6.95	4.77	10.28	10.39	6.47	10.04	16.18
mml-miR-25	-0.00126896	16.0106	0.990106	0.994395	65991.6	66049.6	59487.8	53034.4	57101.5	87561.9	87189.3	68425.9	49385.1	66873.3	65097.2
mml-miR-132-3p	-0.00413496	2.96512	0.994006	0.994395	7.55	7.57	9.33	6.04	10.03	6.18	6.44	6.43	10.7	7.76	5.1
mml-miR-185-3p	0.007639	4.03941	0.994395	0.994395	16.26	16.13	15.21	11.21	13.9	25.63	13.84	15.71	10.94	25.57	13.82

## Sheet: C. DE_miRNA_Grp6_Grp5
DE_miRNA_Group6_vs_Group5_1
names	logFC	logCPM	PValue	FDR	Group6	Group5	Group5:3	Group6:5	Group6:9	Group5:11	Group5:15	Group6:17	Group6:21	Group5:26	Group6:29
mml-miR-16-2-3p	-2.42316	7.67105	0.000155468	0.0374679	69.25	371.46	107.23	35.01	40.04	84.99	982.48	110.12	79.17	311.14	81.88
mml-miR-204-5p	-1.89647	4.41368	0.000319493	0.0384989	9.53	35.53	60.19	10.96	6.53	13.41	49.38	6.89	6.07	19.12	17.18
mml-miR-9-5p	1.76202	2.89137	0.00223088	0.179214	10.42	3.08	4.1	4.55	8.01	4.2	1.79	4.38	22.09	2.25	13.07
mml-miR-338-3p	1.36491	4.50701	0.00320454	0.193074	30.91	12	12.66	43.27	42.88	15.83	6.93	21.42	25.67	12.58	21.3
mml-miR-493-5p	2.13774	3.07672	0.00587374	0.230644	12.49	2.84	5.59	18.5	31.93	4.2	1.08	3.38	4.44	0.51	4.21
mml-miR-26a-5p	1.21138	12.0761	0.00631941	0.230644	5776.15	2494.47	2827.17	7318.18	8692.14	3044.03	1996.3	4845.84	3301.88	2110.38	4722.73
mml-miR-374a-5p	1.5742	6.72877	0.00738342	0.230644	150.14	50.43	61.31	199.26	322.42	77.72	32.64	48.36	56.97	30.06	123.67
mml-let-7f-5p	1.80959	13.0242	0.00823682	0.230644	12208.1	3482.66	3194.67	25764.2	20525.3	6601.08	2572.13	1740.14	4113.4	1562.75	8897.7
mml-let-7g-5p	1.82439	12.4838	0.00861325	0.230644	8410.21	2374.72	2427.4	21273.8	12817.7	4075.89	1845.4	1453.75	2666.35	1150.18	3839.47
mml-miR-98	1.65035	6.4692	0.0127497	0.239702	126.75	40.4	39.22	219.04	260.05	77.72	26.54	27.06	40.18	18.1	87.43
mml-miR-26b-5p	1.68623	11.2235	0.0132703	0.239702	3446.93	1071.1	1113.79	7906.42	5492.35	2137.4	575.36	771.1	1158.53	457.86	1906.22
mml-miR-194-5p	0.996181	8.40212	0.0138389	0.239702	434.3	217.73	247.23	389.41	366.36	225.89	179.59	464.04	395.53	218.2	556.18
mml-miR-34a-5p	1.59264	6.8361	0.0159893	0.239702	162.25	53.79	51.13	417.87	246.03	71.58	34.55	39.09	58.05	57.87	50.2
mml-miR-126	1.823	10.1851	0.0162378	0.239702	1708.81	482.97	714.39	4384.39	2681.59	793.53	291.86	219.62	511.41	132.1	747.06
mml-miR-21-5p	1.1753	9.25755	0.0163559	0.239702	813.23	360.08	354.34	939.22	1674.39	375.19	369.7	504.25	379.39	341.1	568.89
mml-miR-197-3p	-1.04728	11.7586	0.0163822	0.239702	2350.5	4857.63	2829.03	1556.92	2024.1	5893.67	6555.87	3802.01	1980.56	4151.95	2388.93
mml-miR-1260b	-1.05206	5.60113	0.0169085	0.239702	32.7	67.83	41.7	18.93	36.56	70.45	93.02	51.99	24.26	66.15	31.77
mml-miR-590-3p	1.90328	2.43847	0.019198	0.25704	7.71	2.08	1.61	16.79	13.8	5.33	0.96	0.88	1.95	0.41	5.1
mml-miR-363-3p	1.0605	4.49924	0.0214931	0.258388	29.11	13.97	18	24.62	24.34	19.71	6.22	40.34	24.91	11.96	31.32
mml-miR-296-5p	-0.911051	10.2924	0.0230927	0.258388	901.19	1694.65	1286.18	740.24	727.87	2003.61	2062.66	1146.69	1005.93	1426.14	885.23
mml-miR-584-3p	-1.0097	4.89985	0.0243241	0.258388	20.41	41.16	19.24	10.67	22.65	59.95	44.36	23.8	24.8	41.1	20.14
mml-miR-664	-0.987596	3.28969	0.0245451	0.258388	6.64	13.17	10.05	5.27	4.74	8.73	19.49	8.64	6.5	14.42	8.05
mml-miR-146b-5p	1.12928	3.10396	0.0266852	0.258388	11.01	5.01	5.71	7.26	14.54	4.2	1.55	8.52	14.62	8.59	10.11
mml-miR-142-5p	-0.996402	12.7124	0.0283141	0.258388	4653.25	9283.36	5836.79	3531.14	2597.93	7837.33	14363.5	3493.32	6670.91	9095.81	6972.96
mml-miR-301a-3p	1.32714	3.62591	0.0285111	0.258388	16.54	6.6	6.83	31.74	28.03	10.5	6.22	4.51	7.15	2.86	11.28
mml-miR-196b-5p	1.38084	3.78755	0.0288278	0.258388	18.69	7.18	9.31	29.46	38.78	9.69	6.46	3.13	8.12	3.27	13.96
mml-miR-155	1.08634	8.13819	0.028948	0.258388	368.03	173.34	216.83	548.67	510.92	227.02	132.12	123.15	255.6	117.38	401.81
mml-miR-15a-5p	1.40444	11.1671	0.0314827	0.269472	3178.3	1200.64	1582.07	6506.49	6439.18	1474.59	989.9	740.28	910.62	756.02	1294.92
mml-miR-1262-3p	1.3965	3.59054	0.0324261	0.269472	16.34	6.2	4.96	42.98	7.38	10.18	3.23	2.51	13.43	6.44	15.39
mml-miR-29b-3p	0.865584	8.11244	0.0360231	0.280143	345.86	189.81	194.36	385.71	329.27	191.64	162.01	236.4	304.88	211.24	473.04
mml-let-7a-5p	1.22359	14.8043	0.0371125	0.280143	38358.5	16425.8	16274.3	80167.8	57581.1	25999.1	14327.8	9189.81	20710.7	9101.94	24143.2
mml-miR-130b-5p	-0.84678	5.79	0.0372166	0.280143	40.67	73.14	52.5	38.29	34.56	72.71	76.76	57.88	32.82	90.59	39.82
mml-miR-16-5p	1.26784	16.9974	0.0383598	0.280143	176771	73409.9	102584	368465	280547	105340	47758.4	40665.5	76959.3	37957.3	117220
mml-miR-148b-5p	0.906521	4.00628	0.0401469	0.284571	19.99	10.63	9.68	26.62	24.66	8.56	10.28	19.54	11.16	14.01	17.99
mml-miR-374b-5p	1.01836	6.93196	0.0437067	0.295741	157.25	77.64	123.74	193.28	267	86.45	44.12	93.46	69.1	56.24	163.41
mml-miR-20b-5p	1.11107	4.53637	0.0456303	0.295741	30.19	13.98	21.6	59.49	38.04	19.71	7.77	12.53	16.9	6.85	23.98
mml-miR-122a-5p	2.16904	7.18325	0.0470958	0.295741	221.84	49.34	5.71	842.01	175.23	162.87	13.63	60.01	21.55	15.13	10.38
mml-miR-491-3p	-0.860695	3.7611	0.0475464	0.295741	9.77	17.78	18.12	6.26	5.37	17.45	18.05	10.27	12.78	17.48	14.14
mml-miR-454-3p	1.21557	8.82541	0.0478585	0.295741	607.04	261.4	324.68	1245.22	977.28	361.78	226.82	129.92	209.03	132.31	473.76
mml-miR-146a-5p	0.964798	8.20745	0.0505217	0.300321	377.09	193.21	177.23	599.34	585.63	273.72	129.85	184.04	328.7	192.02	187.75
mml-let-7d	1.03035	11.5013	0.0545358	0.300321	3749.26	1835.61	1792.94	6559.15	6575.95	2663.83	1438.99	1356.66	2115.19	1446.7	2139.34
mml-miR-6827-3p	-0.791347	4.07196	0.0548455	0.300321	12.51	21.68	24.7	9.68	9.06	19.39	25.47	14.28	14.51	17.18	15.03
mml-miR-152-3p	1.08322	3.31556	0.055097	0.300321	12.73	5.99	6.21	27.18	14.33	5.98	5.74	2.38	12.13	6.03	7.61
mml-miR-532-3p	-0.813634	9.64562	0.0553258	0.300321	599.04	1052.92	733.51	591.94	370.68	1470.87	1293.12	716.98	740.37	714.2	575.24
mml-miR-1306-5p	-0.885603	7.90787	0.0566335	0.300321	174.28	322.05	177.48	151.29	86.3	581.37	308.6	204.21	216.72	220.75	212.9
mml-miR-339-5p	-0.789833	14.3093	0.0583943	0.300321	15334	26510.5	20790.4	14687.2	9490.29	24800.9	35957.7	20499.4	19906.2	24492.9	12086.9
mml-miR-628-3p	0.845578	3.44899	0.0605207	0.300321	13.31	7.41	7.7	18.36	16.96	9.69	5.62	7.77	11.91	6.65	11.54
mml-miR-484	-0.942508	13.7735	0.0605911	0.300321	9933.62	19091.1	8868	4377.84	8524.39	18537.9	24621.2	20943	6011.66	24337.3	9811.21
mml-miR-324-3p	-0.839203	7.59038	0.0610611	0.300321	142.51	254.99	127.59	85.11	101.47	339.81	303.7	212.98	181.63	248.87	131.37
mml-miR-20a-5p	1.22168	6.99196	0.0656105	0.314183	170.3	73.01	86.13	308.28	391.02	73.2	80.47	45.23	29.03	52.25	77.95
mml-miR-379-5p	1.23929	3.59472	0.067512	0.314183	15.94	6.75	15.89	29.6	28.87	6.14	3.23	4.89	7.04	1.74	9.31
mml-miR-1226	-0.814106	8.0109	0.0677906	0.314183	192.75	338.95	203.55	141.05	102.94	517.06	360.85	238.53	217.04	274.33	264.17
mml-miR-486-5p	-0.764757	17.2729	0.0788377	0.34823	120821	205285	132721	92653.3	81213.6	293357	212028	201898	98948.7	183033	129391
mml-let-7e-5p	0.96529	4.72652	0.0793768	0.34823	33.52	17.17	19.36	60.92	55.11	23.91	13.75	9.4	22.74	11.66	19.42
mml-miR-6529-3p	-0.718785	4.81862	0.0803408	0.34823	21.74	35.8	31.15	17.22	13.7	32.32	42.81	25.31	24.91	36.91	27.56
mml-miR-199a-3p	1.25387	5.35431	0.0809647	0.34823	54.83	23.02	18	85.82	125.7	58.65	9.09	19.17	16.79	6.34	26.67
mml-miR-101-3p	1.09044	9.66866	0.0823614	0.34823	1064.61	499.96	429.06	2124.52	2022.1	666.52	638.61	217.61	418.38	265.64	540.43
mml-miR-671-3p	-0.704027	7.77501	0.0901251	0.374485	170.99	278.58	194.86	111.58	134.13	305.87	337.3	252.44	174.7	276.27	182.11
mml-miR-29c-3p	0.815033	9.07589	0.0934826	0.377602	667.46	379.38	334.24	1019.2	1131.75	416.39	444.79	272.86	453.15	322.08	460.34
mml-miR-133d-3p	0.93866	3.88787	0.0940087	0.377602	18.52	9.65	7.45	14.09	8.43	9.37	15.54	46.85	9.53	6.24	13.69
mml-miR-877-3p	-0.898597	3.78396	0.0957763	0.378395	9.79	18.25	9.93	3.13	5.06	19.71	24.15	23.68	7.58	19.22	9.49
mml-miR-382-5p	0.974317	5.69245	0.0990124	0.38128	65.87	33.51	63.79	130.23	99.36	26.18	29.77	21.05	48.74	14.31	29.98
mml-miR-7	0.927628	11.0081	0.0996706	0.38128	2609.3	1371.77	1752.97	4798.42	3868.33	1620.82	1248.16	464.54	1976.34	865.11	1938.89
mml-miR-1240	-0.750695	3.95276	0.104379	0.393051	11.69	19.73	12.41	9.96	5.69	26.98	23.55	8.77	13.97	15.95	20.05
mml-miR-335-3p	-0.867975	4.34106	0.108357	0.393389	14.64	26.72	15.27	6.55	16.02	11.8	15.9	19.04	11.37	63.9	20.22
mml-miR-27b-3p	0.670155	8.28198	0.109329	0.393389	372.55	234.14	268.21	506.12	402.61	299.25	195.37	274.86	326.21	173.72	352.95
mml-miR-636	-0.728858	4.43882	0.109365	0.393389	16.61	27.53	14.52	12.24	11.59	32.15	31.45	30.19	12.02	32	17
mml-miR-627-5p	0.705766	6.41974	0.114355	0.405289	103.12	63.22	67.77	170.51	97.04	79.34	49.86	53.87	111.12	55.93	83.05
mml-miR-106a-5p	0.948281	6.02477	0.119222	0.416415	82.58	42.79	53	186.16	138.24	50.09	33.6	22.43	28.92	34.46	37.14
mml-miR-30a-5p	1.03689	6.91221	0.123583	0.42084	155.63	75.87	132.55	35.15	91.99	102.77	15.19	72.54	231.23	52.96	347.22
mml-miR-32-5p	0.796352	3.74461	0.124345	0.42084	16.23	9.35	9.06	23.48	27.29	10.66	11.12	7.52	5.85	6.54	17
mml-miR-130b-3p	0.794278	5.06118	0.126475	0.42084	40.87	23.55	28.92	92.37	44.04	26.18	17.94	16.54	24.8	21.17	26.58
mml-miR-190b	1.07759	4.98416	0.127474	0.42084	41.07	19.45	16.51	135.07	30.77	31.35	21.88	9.4	11.48	8.08	18.61
mml-let-7b-3p	-0.966097	5.75672	0.130456	0.424865	37.8	73.88	60.07	4.7	7.06	73.03	84.29	58.88	85.45	78.12	32.93
mml-miR-15b-5p	0.832499	13.7095	0.137603	0.436946	16637.3	9342.75	10977.9	35450.3	22669.4	13448.6	5445.81	5680.71	12687.2	7498.7	6698.76
mml-miR-106b-5p	0.942248	6.40807	0.137792	0.436946	107.65	56.01	67.64	212.78	227.59	54.13	51.65	31.19	26.86	50.61	39.82
mml-miR-93-3p	-0.682056	10.735	0.145635	0.455818	1343.3	2155.21	1599.69	732.84	865.48	1749.28	2834.82	2755.66	923.95	2437.06	1438.55
mml-miR-92b-3p	-0.723477	7.63404	0.147595	0.45603	153.86	254.08	210.62	47.68	118.22	208.44	334.91	207.59	94.12	262.37	301.67
mml-miR-503-5p	0.763628	7.05329	0.153018	0.466803	162.23	95.53	70.37	257.61	260.99	90.97	106.89	116.51	142.85	113.9	33.2
mml-miR-29a-3p	0.665908	7.82732	0.157813	0.47541	271.49	171.12	184.93	252.77	309.99	201.98	80.71	164.74	453.04	216.87	176.92
mml-let-7i-5p	0.922691	13.2333	0.168179	0.486406	12189.5	6430.25	8017.58	30776.3	17692	9669.83	5449.4	1969.66	4791.61	2584.19	5717.86
mml-miR-93-5p	0.811996	15.1825	0.168449	0.486406	45983.7	26192	37257	105016	64054.8	32561.2	20733.1	12244	21687.8	14216.6	26915.8
mml-miR-200c-3p	0.783079	3.34803	0.170298	0.486406	12.21	7.11	10.05	13.38	27.08	9.86	4.66	3.63	7.58	3.89	9.4
mml-miR-361-3p	-0.592999	11.7638	0.170335	0.486406	2836.25	4278.18	2680.72	2259.73	1672.91	5127.62	5989.72	3025.27	4040.3	3314.65	3183.06
mml-miR-7204-3p	-0.550348	6.33248	0.171554	0.486406	66.62	97.54	84.27	84.54	48.05	86.61	113.95	82.81	51.66	105.31	66.04
mml-miR-30d-3p	0.624735	3.36787	0.175968	0.489407	11.97	7.74	9.06	19.93	12.33	5.82	10.16	8.27	7.8	5.93	11.54
mml-let-7c-5p	0.727124	7.07717	0.177258	0.489407	163.59	98.83	70.25	291.06	254.25	139.28	115.86	43.97	129.53	69.94	99.15
mml-miR-6790-3p	-0.603494	4.27329	0.178705	0.489407	15.52	23.59	14.89	8.68	9.06	26.34	24.51	24.18	18.3	28.63	17.36
mml-miR-130a-3p	0.756159	3.84606	0.183131	0.493176	17.31	10.24	13.28	40.14	22.86	12.28	6.7	6.39	8.12	8.69	9.04
mml-miR-132-3p	0.618951	3.14685	0.184173	0.493176	10.21	6.63	5.59	8.25	14.22	6.79	4.54	14.28	8.12	9.61	6.17
mml-miR-191-3p	-0.541555	6.51986	0.18971	0.501453	76.12	110.83	112.94	58.78	57.74	155.6	101.27	92.58	94.87	73.52	76.6
mml-miR-376a-3p	0.617729	4.253	0.191426	0.501453	22.27	14.51	23.71	12.1	18.86	11.31	10.76	26.81	36.07	12.27	17.54
mml-miR-339-3p	-0.589185	9.60289	0.199677	0.512463	635.03	955.29	688.58	547.11	416.09	585.89	1356.85	1064.38	793.44	1189.85	354.11
mml-miR-17-5p	0.752239	8.39793	0.199882	0.512463	411.39	244.22	327.04	887.41	687.52	269.03	214.26	126.53	172.75	166.56	182.74
mml-miR-190a-5p	1.03423	5.98628	0.211404	0.5363	81.77	39.91	45.05	188.44	25.6	6.46	86.33	3.76	138.63	21.78	52.44
mml-miR-421	0.502924	6.59528	0.223091	0.560052	110.97	78.3	74.47	133.36	101.26	77.88	62.17	75.17	131.16	98.67	113.92
mml-miR-15b-3p	-0.585689	11.4257	0.233654	0.576784	2249.89	3376.55	2827.05	1028.17	901.94	2501.44	5435.53	3577.75	2612.2	2742.17	3129.37
mml-miR-423-5p	-0.496104	12.06	0.239584	0.576784	3611.06	5093.06	2728.87	2630.63	3059.96	7181.15	5032.59	4446.7	4563.19	5429.63	3354.79
mml-miR-30a-3p	0.594447	4.70988	0.240308	0.576784	30.48	20.22	30.28	20.07	26.13	26.18	10.52	14.66	37.69	13.91	53.87
mml-miR-331-3p	-0.493586	11.5597	0.241832	0.576784	2555.15	3597.54	2430.75	2077.83	1482.62	5028.41	3500.69	3250.65	2717.79	3430.29	3246.87
mml-miR-181a-3p	-0.505613	4.00363	0.242049	0.576784	13.32	18.91	17.87	7.97	10.43	15.03	18.29	14.91	21.55	24.44	11.72
mml-miR-18a-3p	-0.580322	9.41524	0.244116	0.576784	559.42	836.42	423.47	272.27	500.18	736.49	1048.13	1213.72	316.14	1137.6	494.79
mml-miR-18b	0.580201	4.58259	0.260432	0.60936	27.83	18.6	16.01	43.41	52.26	18.1	22.72	15.41	10.72	17.59	17.36
mml-miR-423-3p	-0.507063	12.5915	0.263788	0.611279	5198.47	7387.83	4430.84	2934.93	4779.86	9110.11	7751.55	10123.5	4135.39	8258.81	4018.63
mml-miR-369-5p	0.560587	3.74778	0.271448	0.623038	15.4	10.44	21.97	15.8	20.86	7.92	5.02	8.77	17.33	6.85	14.23
mml-miR-296-3p	-0.522687	4.04291	0.281833	0.640772	13.6	19.59	17	4.7	14.65	32.32	12.79	12.03	24.26	16.26	12.35
mml-let-7i-3p	-0.458478	4.69072	0.28824	0.648657	21.96	30.16	17.62	27.18	17.81	28.6	49.14	24.18	24.15	25.26	16.47
mml-miR-140-5p	0.456951	6.25425	0.291799	0.648657	86.55	63.05	52.62	110.73	120.54	61.72	88.96	63.27	61.41	48.87	76.78
mml-miR-491-5p	-0.484127	7.70786	0.293376	0.648657	177.41	248.14	163.33	90.38	146.35	238.82	288.87	360.31	158.45	301.53	131.55
mml-miR-187-5p	-0.602135	5.72162	0.300156	0.651297	42.72	64.85	109.22	57.36	9.38	76.43	17.1	50.86	73.65	56.64	22.37
mml-miR-25	0.415369	16.0352	0.304915	0.651297	75557.7	56655.2	58563	104891	60250.1	66127.4	52234.6	75138.1	67899.7	49695.9	69609.7
mml-miR-19a-3p	0.432031	7.36729	0.305198	0.651297	186.3	138.09	117.41	228.58	213.47	139.12	170.98	114.38	145.34	124.84	229.72
mml-miR-576-5p	-0.480732	5.78482	0.30538	0.651297	46.67	65.18	46.91	19.21	28.87	79.34	66.36	50.74	43.86	68.1	90.65
mml-miR-376c-3p	0.525506	3.1452	0.317965	0.672189	9.97	6.9	10.3	4.55	12.12	2.42	7.29	15.66	12.13	7.57	5.37
mml-miR-148b-3p	0.421945	9.41472	0.328244	0.681046	768.95	573.94	460.83	686.73	670.13	530.96	484.96	628.66	1252.65	819	606.56
mml-miR-424-5p	0.576455	6.23886	0.328553	0.681046	88.22	59.13	41.95	147.02	152.47	33.93	83.34	57.13	70.72	77.3	13.78
mml-miR-7180-5p	-0.515773	6.78658	0.330633	0.681046	92.5	132.24	80.67	28.89	67.86	112.95	136.78	217.86	53.29	198.56	94.59
mml-miR-362-5p	0.448582	4.86677	0.344224	0.690604	32.84	24.05	15.76	14.66	36.04	18.91	29.41	56.38	28.59	32.11	28.55
mml-miR-30c-1-3p	-0.411164	5.11978	0.344959	0.690604	30.14	40.06	24.95	38.14	24.23	41.36	61.22	27.56	41.59	32.72	19.15
mml-miR-148a-5p	-0.459262	3.2933	0.349364	0.690604	8.19	11.26	11.54	3.13	9.48	7.92	7.29	13.4	5.2	18.3	9.75
mml-miR-199a-5p	0.506287	3.65559	0.352429	0.690604	14.21	10.02	7.32	5.69	4.85	11.15	12.32	13.28	18.95	9.3	28.28
mml-let-7f-3p	-0.549761	5.30467	0.353151	0.690604	32.56	47.68	51.01	5.55	6.64	39.59	46.15	54	42.56	53.99	54.05
mml-miR-99a-5p	0.419777	4.87003	0.354047	0.690604	32.67	24.41	16.88	19.5	30.56	22.46	22.72	29.19	54.91	35.58	29.17
mml-miR-320a	-0.406656	11.5386	0.355331	0.690604	2598.48	3444.56	1646.48	2461.69	3726.62	3668.86	3544.81	3096.18	2111.61	4918.09	1596.32
mml-miR-543-3p	0.433926	3.02694	0.358902	0.691963	8.95	6.61	11.05	6.69	10.43	5.01	4.07	11.9	10.29	6.34	5.46
mml-miR-103-3p	0.455408	12.7475	0.366087	0.700215	7816.96	5700.92	4880.5	11914.6	13851.6	4434.11	8783.65	3515.11	5162.01	4705.41	4641.39
mml-miR-381-3p	0.476185	5.17187	0.372387	0.706657	40.92	29.41	65.04	20.92	30.87	17.94	17.1	68.15	36.07	17.59	48.59
mml-miR-370-3p	0.444952	4.98217	0.386935	0.724642	35.59	26.14	39.72	64.19	33.72	32.32	19.97	16.41	43.21	12.58	20.4
mml-miR-361-5p	0.372094	11.507	0.388215	0.724642	3237.15	2501.24	2561.2	1903.2	2799.6	3158.43	1592.64	4364.39	3578.71	2692.68	3539.86
mml-miR-142-3p	0.39817	13.8065	0.390937	0.724642	16047	12176.8	11391.7	6586.9	11270.6	15307.4	9535.97	22206.8	16035.8	12472.1	24134.9
mml-miR-323b-3p	-0.379211	6.28502	0.397813	0.724642	68.58	89.21	158.74	61.2	37.83	68.03	76.28	71.79	90.65	53.78	81.44
mml-miR-199a	0.454927	3.96855	0.399741	0.724642	17.5	12.79	11.05	7.12	5.16	16.32	13.27	18.17	25.56	10.53	31.5
mml-miR-7186-5p	0.39843	5.78206	0.399906	0.724642	61.39	46.56	44.93	83.83	104.42	47.18	52.01	43.97	50.47	42.13	24.25
mml-miR-26b-3p	-0.343415	5.99511	0.405115	0.728602	56.77	72.06	75.96	53.52	42.15	107.61	47.11	66.9	59.35	57.57	61.93
mml-miR-30e-5p	0.336252	10.5571	0.417016	0.74445	1659.71	1314.65	1171.75	1220.46	1343.64	1128	1623.48	2114.98	1467.42	1335.35	2152.05
mml-miR-182	0.364255	5.06776	0.426242	0.750309	36.95	28.75	25.94	21.78	59.53	42.82	26.19	26.31	37.47	20.04	39.64
mml-miR-17-3p	-0.406541	3.04397	0.426524	0.750309	7.01	9.26	4.59	7.69	10.75	5.17	16.14	8.77	4.55	11.14	3.31
mml-miR-337-3p	-0.39897	2.84296	0.436636	0.757562	6.07	8.03	17.25	3.13	4.21	5.82	5.26	6.64	7.04	3.78	9.31
mml-miR-221-5p	0.353967	3.23942	0.436934	0.757562	10.19	7.96	8.56	8.4	17.6	5.82	9.09	9.52	6.5	8.38	8.95
mml-miR-1249	-0.546764	7.23465	0.44389	0.762334	124.83	182.34	106.24	25.19	31.08	171.92	241.88	474.31	60.54	209.3	33.02
mml-miR-1271-5p	-0.389949	7.1795	0.450235	0.762334	127.19	166.65	204.66	66.04	163.42	114.08	233.16	280.5	60.76	114.72	65.24
mml-let-7b-5p	-0.429676	12.4826	0.450488	0.762334	4958.51	6678.76	3421.05	9949.1	7936.23	6616.75	12326.9	1502.49	3528.67	4350.31	1876.06
mml-miR-92a-3p	-0.300955	16.8468	0.452339	0.762334	106853	131638	92275.2	94534.3	113661	170519	127811	143948	82329.5	135948	99791.1
mml-miR-584-5p	-0.36646	9.34282	0.457752	0.764776	575.18	741.52	476.59	712.06	1198.86	794.82	1005.92	313.2	410.26	688.74	241.53
mml-miR-185-5p	0.301882	11.782	0.460479	0.764776	3843.92	3118.16	2017.33	4308.81	4428.36	3532.97	3145.93	3402.99	3448.31	3776.4	3631.14
mml-miR-652	-0.341794	8.22762	0.463308	0.764776	267.73	339.27	202.43	343.15	440.12	263.05	491.9	270.1	153.79	399.68	131.46
mml-let-7a-3p	-0.379386	6.64992	0.470619	0.768838	88.35	114.96	126.22	28.32	23.6	104.87	109.52	110.37	124.66	119.22	154.82
mml-miR-320b	-0.332932	5.38817	0.472668	0.768838	37.35	47.02	20.11	34.87	59.22	45.73	51.29	43.85	27.94	70.96	20.85
mml-miR-154-5p	0.37243	5.38819	0.47824	0.768838	46.32	35.78	75.34	23.34	28.98	24.4	20.8	73.29	53.39	22.6	52.62
mml-miR-181a-5p	-0.366722	7.1449	0.480193	0.768838	125.2	161.41	72.23	169.94	234.34	132.66	241.88	81.06	101.91	198.87	38.75
mml-miR-503-3p	0.323156	5.65195	0.481923	0.768838	54.97	43.92	33.51	77.85	64.91	45.57	50.58	59.63	52.42	46.01	20.05
mml-miR-500b-5p	0.336884	3.81745	0.485865	0.768838	15.29	12.08	11.29	10.82	18.33	9.37	12.32	29.57	8.34	15.34	9.4
mml-miR-144	-0.30678	6.56723	0.4881	0.768838	85.58	105.88	75.96	109.02	140.56	146.23	111.68	45.23	62.06	89.67	71.05
mml-miR-106b-3p	-0.293528	11.4543	0.494404	0.771356	2550.1	3125.48	1932.07	2129.93	3920.07	2935.12	4469.66	3093.17	1921.86	3165.06	1685.45
mml-miR-28-3p	0.301164	7.68877	0.4961	0.771356	224.91	182.56	195.85	175.77	141.61	241.56	124.23	193.31	358.81	168.61	255.05
mml-miR-425	-0.29678	14.381	0.501109	0.77415	19369.6	23793.6	18000.6	12063.8	16900.7	17614.9	27849.7	34944.7	12823	31709.2	20115.9
mml-miR-340-3p	-0.265848	6.75605	0.5125	0.785402	98.95	119.01	127.71	98.06	70.81	159.48	92.31	80.3	127.26	96.52	118.31
mml-miR-138-3p	-0.292333	3.25347	0.514911	0.785402	8.46	10.39	8.32	8.68	4.74	14.87	10.28	7.52	14.3	8.08	7.07
mml-miR-1296-5p	-0.314141	7.13425	0.520232	0.786038	126.57	157.4	126.1	52.66	105.16	295.86	88.12	224.38	140.47	119.53	110.16
mml-miR-329-3p	-0.299805	3.02296	0.521851	0.786038	7.16	8.82	17.25	5.55	6.53	6.46	4.9	9.65	8.45	6.65	5.64
mml-miR-29b-2-5p	0.301341	4.36081	0.526203	0.78767	22.19	17.99	14.4	37.86	30.03	16.97	25.35	11.78	14.62	15.23	16.65
mml-miR-18a-5p	-0.288755	3.74925	0.529498	0.78771	12.04	14.69	10.05	17.79	16.75	11.47	21.88	9.15	5.96	15.34	10.56
mml-miR-432-5p	0.309968	5.02421	0.545002	0.805801	35.36	28.53	37.48	58.07	48.05	36.68	28.1	15.53	33.03	11.86	22.1
mml-miR-1180-3p	-0.26305	8.72808	0.553228	0.810816	389.22	467.09	221.67	414.46	559.92	701.59	521.79	446.87	285.92	423.3	238.94
mml-miR-125b-5p	0.280315	9.04877	0.555123	0.810816	574.45	473.02	403.74	566.6	304.83	548.57	540.09	293.28	1076.44	399.68	631.08
mml-miR-330-5p	-0.257938	3.1182	0.564828	0.820021	7.77	9.29	6.7	4.7	4.95	7.76	10.52	11.15	7.47	12.17	10.56
mml-miR-485-3p	-0.256405	8.35381	0.57368	0.827886	300.91	359.46	551.19	293.76	154.47	424.31	298.32	280.5	465.71	164	310.08
mml-miR-7180-3p	-0.235907	4.39431	0.58194	0.834806	19.27	22.7	10.8	13.38	19.91	25.21	27.5	23.55	22.42	27.3	17.09
mml-miR-134-5p	0.269641	5.03379	0.588013	0.83571	35.21	29.2	52.75	58.78	36.88	26.01	24.63	23.43	34.77	13.39	22.19
mml-miR-487b-3p	0.266318	3.52945	0.589505	0.83571	12.23	10.17	21.72	11.1	13.07	6.95	6.58	11.78	14.19	5.42	11.01
mml-miR-24-3p	0.211155	9.86971	0.602832	0.841952	995.6	860.02	780.67	1214.34	1149.34	803.54	919.59	1037.32	868.06	936.28	708.94
mml-miR-148a-3p	0.218028	9.74554	0.603182	0.841952	915.23	786.86	821.01	830.05	786.77	685.43	779.58	582.18	1073.62	861.43	1303.51
mml-miR-19b	0.22463	12.4834	0.604543	0.841952	6118.36	5236.18	4435.68	3899.2	4010.9	4477.58	5207.39	6754.24	7985.18	6824.08	7942.31
mml-miR-107-3p	0.252764	8.18303	0.607883	0.841952	312.74	262.46	206.52	434.81	517.14	171.76	444.55	180.78	258.09	226.99	172.89
mml-miR-191-5p	-0.185855	16.617	0.635259	0.865667	94725.5	107749	105128	91757.8	63395.8	130103	93329.3	93115.7	122264	102438	103094
mml-miR-660-5p	0.19317	5.63967	0.63707	0.865667	52.55	45.96	40.58	58.21	63.43	41.04	57.51	42.72	51.77	44.68	46.62
mml-miR-671-5p	-0.232967	4.79665	0.641089	0.865667	25.56	30.03	13.16	11.67	26.66	16.48	55	42.47	20.79	35.48	26.22
mml-miR-942-5p	-0.182728	11.0898	0.642672	0.865667	2055.88	2333.48	1719.84	1897.51	1847.82	2623.76	2360.14	2751.28	1525.14	2630.21	2257.65
mml-miR-3200-3p	-0.180909	7.56163	0.651794	0.865667	178.11	201.92	152.78	132.22	129.07	246.73	190.47	241.42	196.14	217.68	191.69
mml-miR-7186-3p	0.202096	6.1429	0.653036	0.865667	74.78	64.99	88.12	52.38	45.2	47.83	67.68	114.26	93.14	56.34	68.91
mml-miR-424-3p	0.254222	5.00456	0.656462	0.865667	34.35	28.77	14.65	46.4	55.95	22.3	41.85	28.81	34.77	36.3	5.82
mml-miR-299-5p	-0.20535	6.5044	0.658219	0.865667	84.78	97.76	193.86	48.96	69.65	60.43	79.27	105.11	116.97	57.46	83.23
mml-miR-378d	0.220943	4.57142	0.661399	0.865667	25.14	21.54	16.26	32.59	44.78	14.06	34.79	20.8	12.13	21.06	15.39
mml-miR-331-5p	0.199324	5.57694	0.667127	0.865667	50.41	43.89	25.44	75.15	61.53	44.92	65.4	50.11	30.98	39.77	34.27
mml-miR-27a-3p	0.175885	6.3636	0.669983	0.865667	86.52	76.59	74.84	60.06	83.35	75.46	74.37	92.83	117.51	81.7	78.84
mml-miR-502-3p	-0.181514	4.92625	0.670367	0.865667	28.48	32.28	23.83	20.21	32.24	25.05	37.19	41.97	30	43.05	17.99
mml-miR-324-5p	-0.180455	7.69731	0.6717	0.865667	195.72	221.8	145.71	150.87	100.63	192.93	274.53	235.4	232.1	274.02	259.61
mml-miR-335-5p	0.218171	4.26627	0.687556	0.881388	20.26	17.41	10.3	8.82	18.76	16.16	9.33	15.28	38.56	33.84	19.87
mml-miR-150-5p	-0.15795	14.5519	0.704775	0.893892	22844	25487.1	24541.5	21155.1	18626.1	37109.6	18493.8	17903.5	37997.6	21803.4	18537.5
mml-miR-192-5p	0.189713	9.19162	0.707792	0.893892	618.34	542.16	423.72	232.7	268.69	580.4	515.45	885.11	783.91	649.07	921.3
mml-miR-23b-3p	-0.146919	9.93491	0.708437	0.893892	934.09	1034.22	1105.6	684.59	701.64	989.85	906.2	1277.23	1092.03	1135.25	914.94
mml-miR-500a-5p	0.184347	4.00081	0.718003	0.901243	16.67	14.65	11.91	9.82	20.86	10.99	16.26	33.95	10.51	19.43	8.23
mml-miR-221-3p	0.217775	11.7307	0.723826	0.903846	3623.97	3116.19	1927.97	6842.24	6886.36	2007.32	5722.49	1736.01	1526.44	2806.99	1128.82
mml-miR-211	-0.194764	2.62737	0.732398	0.907692	5.57	6.38	2.85	5.12	1.58	4.85	10.16	6.14	2.49	7.67	12.53
mml-miR-409-5p	0.170678	3.66232	0.734745	0.907692	13.08	11.6	21.97	8.4	11.27	6.14	8.49	18.79	17.98	9.82	8.95
mml-miR-6529-5p	-0.135654	8.12866	0.742391	0.907692	267.9	294.32	213.35	169.65	172.27	299.41	303.58	384.36	302.6	360.93	310.62
mml-miR-7205-3p	-0.171555	5.48587	0.743513	0.907692	42.2	47.57	46.05	28.61	22.02	64.79	68.39	54.12	26.43	11.04	79.82
mml-miR-1255a-3p	0.163361	3.06771	0.745739	0.907692	8.54	7.64	6.83	4.98	4.43	7.27	9.21	7.77	10.83	7.26	14.68
mml-miR-342-3p	0.150351	10.3043	0.770271	0.908096	1322.34	1191.49	1115.16	819.24	1174.84	1747.34	531.12	1037.07	2724.51	1372.36	856.06
mml-miR-138-5p	0.159814	3.16771	0.770878	0.908096	9.19	8.21	8.07	13.95	17.17	6.3	13.27	5.26	4.66	5.21	4.92
mml-miR-151-5p	-0.111742	6.50527	0.771033	0.908096	87.47	94.54	87.38	84.12	69.75	114.4	105.22	93.21	94.98	71.16	95.31
mml-miR-3122	0.125687	3.80373	0.771447	0.908096	14.27	13.07	11.91	17.22	14.54	13.9	12.55	16.54	12.24	13.91	10.83
mml-miR-378a	0.150709	7.21625	0.771863	0.908096	155.31	139.89	88.86	139.2	324.32	93.07	237.34	122.77	82.42	140.28	107.84
mml-miR-140-3p	-0.11678	13.2637	0.772581	0.908096	9479.33	10278.5	10413	6666.89	5394.89	9588.39	9645.73	12808.8	12039.1	11467.1	10487
mml-miR-451	-0.119206	15.4269	0.774812	0.908096	42426.9	46081.4	41174	24638.8	55367.8	31589.9	38603.8	51982.9	40032.4	72957.8	40112.5
mml-miR-210-3p	0.1449	9.25702	0.779384	0.908096	638.76	577.71	599.47	1245.93	846.73	651.5	726.25	365.82	439.93	333.63	295.41
mml-miR-22	0.129588	10.5702	0.779983	0.908096	1580.48	1444.68	1543.22	1244.37	2567.05	958.66	1687.21	2090.68	1042.86	1589.64	957.45
mml-miR-1304	0.148759	5.80929	0.794486	0.920535	58.4	52.68	55.85	110.02	85.66	66.73	57.15	15.91	24.91	30.98	55.48
mml-miR-500a-3p	-0.0972568	4.77971	0.805115	0.92445	26.42	28.26	24.95	23.77	28.66	28.6	33.12	25.06	35.63	26.38	18.97
mml-miR-125a-5p	-0.106036	8.72767	0.805538	0.92445	409.79	441.07	451.52	374.18	211.26	516.58	442.52	251.06	741.13	353.67	471.34
mml-miR-494-3p	-0.106433	5.55993	0.816785	0.932916	45.39	48.87	104.75	36.29	36.98	26.01	33	48.86	62.06	31.7	42.78
mml-miR-181b-5p	-0.112211	5.78693	0.822727	0.933124	53.08	57.36	27.68	71.88	103.47	47.83	89.91	35.2	37.15	64.01	17.72
mml-miR-196a-5p	0.156869	7.7889	0.827855	0.933124	231.54	207.7	296.63	404.21	435.17	328.66	176.36	39.84	144.15	29.14	134.32
mml-miR-185-3p	-0.094085	4.01233	0.828583	0.933124	15.44	16.51	7.32	14.66	20.97	27.31	14.23	16.16	13.43	17.18	11.99
mml-miR-30d-5p	-0.0728905	13.0878	0.852272	0.943952	8509.55	8950.54	8800.61	5152.67	5922.04	9605.36	8136.19	11104	10589.3	9260.01	9779.8
mml-miR-223	0.0781795	15.1102	0.852748	0.943952	36219	34308.6	37815.6	40275.7	25589.7	38693.2	28449	33004	45411.1	32276.4	36814.6
mml-miR-10a-5p	-0.0755369	5.98779	0.85535	0.943952	61.73	65.08	82.29	29.46	59.01	73.68	39.34	69.15	63.25	65.03	87.79
mml-miR-20a-3p	-0.0989826	2.66922	0.857262	0.943952	5.93	6.35	3.97	5.27	12.22	3.55	12.55	5.01	1.62	5.32	5.55
mml-miR-340-5p	0.0842102	7.36868	0.857782	0.943952	169.3	159.71	115.92	194.56	209.47	200.36	157.23	91.83	245.96	165.33	104.7
mml-miR-431	0.0799451	4.40145	0.876335	0.956229	21.42	20.25	35.12	21.35	33.3	13.41	17.34	23.18	19.71	15.13	9.58
mml-miR-187-3p	0.072965	9.64259	0.876874	0.956229	816.98	776.68	1158.22	1141.46	444.96	707.08	556.47	608.86	970.19	684.95	919.42
mml-miR-29c-5p	-0.0579233	6.11914	0.887737	0.959718	68.03	70.82	55.11	36.29	46.89	74	73.41	118.26	63.47	80.78	75.26
mml-miR-23a-3p	0.0615826	11.3969	0.888038	0.959718	2747.26	2632.47	3186.23	1927.68	2392.36	2669.81	1859.27	3550.69	2882.52	2814.56	2983.05
mml-miR-30e-3p	0.0596897	8.43484	0.894234	0.9621	352.15	337.89	338.95	279.67	225.49	350.31	356.19	341.76	362.28	306.13	551.53
mml-miR-654-3p	-0.0596841	7.99055	0.901405	0.965505	249.4	259.95	595.74	102.19	166.48	161.74	153.88	368.07	311.92	128.42	298.36
mml-miR-582-3p	-0.0737501	2.88788	0.917426	0.969571	6.98	7.36	13.28	1.57	2.84	7.76	0.24	8.27	1.62	8.18	20.58
mml-miR-30c-5p	-0.0383074	13.4868	0.91842	0.969571	11343.7	11649	13209	8269.35	6741.58	11757.3	9193.41	13704.9	13209.9	12436.1	14792.8
mml-miR-26a-2-3p	-0.040515	3.6173	0.920899	0.969571	11.87	12.26	13.16	8.97	6.85	17.94	10.88	9.77	11.37	7.06	22.37
mml-miR-151-3p	-0.0371597	10.3718	0.925554	0.969571	1309.61	1343.83	1333.35	779.1	777.5	2054.99	1169.73	1717.72	1388.46	817.26	1885.28
mml-miR-365-3p	-0.0425376	3.64064	0.926657	0.969571	12.08	12.41	11.17	9.25	9.27	8.4	5.74	14.41	19.06	24.33	8.41
mml-miR-532-5p	0.0419709	7.24406	0.929339	0.969571	153.33	148.91	118.65	202.67	119.8	140.58	213.43	138.94	196.14	123	109.09
mml-miR-128a-3p	-0.0268091	11.9509	0.941334	0.97374	3925.87	3999.52	4440.02	2741.08	1999.86	4095.6	3591.68	5247.99	5032.69	3870.77	4607.74
mml-miR-4766-3p	0.0433214	4.70923	0.941416	0.97374	26.26	25.48	22.46	10.11	14.33	18.91	24.75	45.6	22.96	35.79	38.3
mml-miR-409-3p	0.0294384	9.70867	0.958907	0.984402	844.1	827.06	1525.47	712.49	509.13	683.65	629.28	799.16	1273.66	469.83	926.04
mml-miR-222-3p	-0.0184278	8.10728	0.960938	0.984402	273.99	277.47	147.2	468.97	381.95	173.22	460.21	227.38	151.3	329.24	140.32
mml-miR-30b-5p	0.0240539	10.5879	0.964378	0.984402	1550.33	1524.71	1972.16	987.18	972.43	1410.77	1168.29	1830.22	1599.98	1547.61	2361.81
mml-miR-505-3p	-0.0130434	5.99783	0.968063	0.984402	63.43	64	78.32	83.4	49.1	78.69	42.57	61.01	83.18	56.44	40.45
mml-miR-128b-3p	-0.00755928	11.7419	0.977201	0.989519	3416.73	3434.69	3787.56	2370.74	1700.41	3355.56	3176.19	4666.82	4184.24	3419.45	4161.45
mml-miR-323a-3p	-0.00112449	5.11401	0.989908	0.99568	34.38	34.42	62.68	27.47	25.71	34.09	19.97	35.83	44.95	20.96	37.94
mml-miR-186-5p	0.000222393	11.6504	0.991548	0.99568	3214.59	3214.08	3050.2	1867.05	1993.75	2595.48	3258.09	4982.15	3314.01	3952.57	3915.98
mml-miR-99b-5p	0.00353182	5.93944	0.996929	0.996929	61.19	61.04	71.24	48.11	27.08	47.18	61.34	34.45	126.07	64.42	70.25

## Sheet: D. PairedDE_miRNA_Grp3_Grp1
PairedDE_miRNA_Group3_vs_Group1_1
names	logFC	logCPM	PValue	FDR	Group3	Group1	Group3:6	Group3:8	Group3:5	Group3:25	Group1:2	Group1:10	Group1:18	Group1:30
mml-let-7b-5p	-0.513595	11.8625	0.0182268	0.997199	2591.05	3708.45	3001.85	3011.97	1625.23	2725.13	3178.22	4250.27	3314.65	4090.65
mml-miR-30d-3p	-0.593858	3.10106	0.0407001	0.997199	5.8	8.6	9.74	5.21	3.48	4.79	12.05	6.91	7.65	7.79
mml-miR-1262-3p	-0.688354	3.51126	0.0535148	0.997199	6.55	11.48	5.36	3.56	3.18	14.1	7.23	10.52	3.17	25.01
mml-miR-329-3p	0.619347	3.19216	0.0823604	0.997199	8.63	7.08	11.36	11.43	4.81	6.92	17.19	4.31	2.4	4.41
mml-miR-28-5p	-0.730599	1.28105	0.0893029	0.997199	1.45	2.24	2.11	1.52	0.31	1.86	2.1	1.9	2.08	2.87
mml-miR-320a	-0.366461	11.482	0.0893521	0.997199	2091.6	2594.69	1204.31	2106.48	1099.23	3956.4	1489.66	2932.64	1894.52	4061.95
mml-miR-543-3p	0.498375	3.15559	0.0913145	0.997199	8.59	6.51	12.66	9.02	5.84	6.83	11.84	4.51	3.94	5.74
mml-miR-485-5p	-0.688817	1.44336	0.0939212	0.997199	1.6	2.69	3.08	1.4	1.02	0.89	5.14	2.61	0.77	2.25
mml-miR-7	-0.344834	10.2371	0.0996898	0.997199	974.2	1155.3	1878.53	1052.41	412.3	553.57	1868.93	1261.33	662.51	828.44
mml-miR-877-3p	0.474926	3.95926	0.102409	0.997199	14.34	10.66	9.25	12.32	12.91	22.87	5.97	8.52	15.85	12.3
mml-miR-1262-5p	-0.6133	2.24165	0.120351	0.997199	2.99	4.41	4.71	1.02	0.82	5.41	3.25	2.61	1.86	9.94
mml-miR-26a-2-3p	-0.477932	3.86397	0.127519	0.997199	10.07	14.53	15.26	9.9	7.48	7.62	13.21	12.02	23.17	9.74
mml-miR-22	0.331041	10.4765	0.136426	0.997199	1329.7	1128.45	1592.87	1545.86	1054.67	1125.41	1686.05	830.4	1278.35	718.98
mml-miR-496	0.638582	0.552355	0.152307	0.997199	1.37	0.86	3.08	1.14	0.61	0.62	1.89	0.5	0.55	0.51
mml-miR-101-3p	-0.390997	8.68762	0.155863	0.997199	347.8	390.32	671.14	478.72	108.27	133.07	590.77	415.3	393.29	161.94
mml-miR-340-5p	-0.42977	6.81928	0.164221	0.997199	93.67	106.1	151.43	143.61	25.2	54.44	149.87	106.2	89.2	79.12
mml-miR-16-2-3p	0.534318	7.17338	0.164439	0.997199	131.82	114.74	91.87	214.22	116.78	104.44	70.64	41.88	273.05	73.38
mml-miR-375	-0.939798	1.06546	0.16488	0.997199	0.86	2.09	0.16	1.27	0.51	1.51	1.78	5.41	0.66	0.51
mml-miR-23b-3p	0.289239	10.0854	0.167208	0.997199	1011.44	837.48	968.81	1345.48	936.15	795.34	1002.95	784.41	788.66	773.92
mml-miR-30c-5p	0.297766	13.7586	0.167736	0.997199	12654.5	10465.8	12565.6	11768.9	16140.3	10143.2	10327.1	8660.06	11973.2	10902.8
mml-miR-494-3p	0.455706	5.60787	0.16807	0.997199	47.16	38.64	71.58	55.36	41.59	20.13	85.83	22.64	24.16	21.93
mml-miR-26a-1-3p	0.450566	3.04846	0.178892	0.997199	7.92	5.54	8.44	6.6	12.91	3.72	7.02	4.41	5.79	4.92
mml-miR-500b-3p	-0.580711	0.818745	0.185933	0.997199	0.98	1.5	0.65	1.27	1.13	0.89	0.94	1.7	1.42	1.95
mml-miR-664	0.392687	3.55791	0.189042	0.997199	10.73	8.55	6.33	14.48	11.58	10.55	6.81	6.31	14.1	6.97
mml-miR-542-5p	-0.454758	1.86364	0.194786	0.997199	2.31	3.34	1.95	2.79	1.84	2.66	3.88	2.91	1.86	4.71
mml-miR-5697-3p	0.500174	1.51517	0.19502	0.997199	2.62	1.83	3.41	2.16	3.69	1.24	2.31	1.3	2.08	1.64
mml-miR-29c-3p	-0.3337	8.3202	0.19862	0.997199	269.12	296.29	485.94	339.04	92.91	158.61	424.45	252.99	275.67	232.04
mml-miR-206	-0.861734	0.86204	0.202478	0.997199	0.91	1.75	1.95	0.38	0.41	0.89	0.84	2.81	2.73	0.61
mml-miR-337-3p	0.377387	3.15232	0.206991	0.997199	8.67	6.89	18.02	7.62	5.22	3.81	14.88	3.21	5.47	4
mml-miR-323b-3p	0.382399	6.31914	0.210159	0.997199	76.81	63.56	110.69	98.66	64.53	33.33	129.33	50.4	40.99	33.51
mml-miR-409-5p	0.408045	3.54602	0.210259	0.997199	10.99	9.52	18.67	13.08	5.22	7	22.53	4.01	5.68	5.84
mml-miR-29a-3p	-0.283043	7.488	0.219394	0.997199	140.89	168.48	192.82	176.76	58.8	135.2	218.83	165.52	91.16	198.42
mml-miR-335-5p	-0.406422	4.20976	0.221202	0.997199	13.48	16.83	16.88	9.78	4.4	22.87	11	15.53	11.59	29.21
mml-miR-4446-3p	-0.547765	1.14663	0.224511	0.997199	1.25	2	1.14	1.78	1.02	1.06	1.47	3.81	0.77	1.95
mml-miR-493-3p	-0.473902	1.47512	0.235575	0.997199	1.83	2.74	3.9	2.16	0.82	0.44	7.13	1.9	1.2	0.72
mml-miR-1306-3p	0.545172	0.67663	0.247702	0.997199	1.38	0.85	1.3	1.52	0.2	2.48	0.63	1	0.66	1.13
mml-miR-301a-5p	0.49483	0.827652	0.250642	0.997199	1.53	1.09	2.43	1.27	0.92	1.51	1.26	0.6	0.98	1.54
mml-miR-654-3p	0.259481	8.19585	0.252444	0.997199	274.18	253.2	552.65	256.63	159.59	127.84	590.35	114.62	183.2	124.63
mml-miR-372-3p	-0.503735	1.6256	0.253679	0.997199	1.97	3.06	4.54	1.02	0.2	2.13	7.65	0.3	1.31	2.97
mml-miR-21-5p	-0.28616	8.61332	0.255798	0.997199	316.27	365.29	506.23	320.5	125.99	312.34	503.26	265.21	372.41	320.29
mml-miR-15b-3p	0.238567	11.7633	0.259747	0.997199	3131.43	2728.46	3557.27	2908.99	3632.84	2426.63	3118.28	1959.27	3045.86	2790.44
mml-miR-409-3p	0.26506	9.69258	0.271361	0.997199	775.42	676.48	1263.07	806.2	705.36	327.05	1336.54	552.96	424.88	391.52
mml-miR-23a-3p	0.237216	11.6705	0.273458	0.997199	2940.12	2593.43	2969.39	3406.88	2594.97	2789.23	3408.06	2214.26	2057.72	2693.69
mml-miR-487b-3p	0.339413	3.52006	0.27365	0.997199	10.32	9.58	17.53	9.9	7.89	5.94	22.43	5.21	5.14	5.53
mml-miR-32-5p	-0.452016	3.57403	0.274232	0.997199	8.76	11.56	16.07	7.62	2.77	8.6	12.37	6.41	18.15	9.33
mml-let-7i-5p	-0.230157	12.5978	0.280129	0.997199	5003.1	5975.94	6185.65	8862.84	2268.72	2695.17	10552.2	7321.78	2977.98	3051.79
mml-miR-6529-3p	0.301551	5.29389	0.283903	0.997199	35.56	28.86	23.21	39.87	52.04	27.13	22.22	25.55	39.9	27.78
mml-miR-7189-3p	-0.449604	0.939417	0.284111	0.997199	1.22	1.66	2.11	1.27	0.72	0.8	2.62	1.2	0.98	1.84
mml-miR-301a-3p	-0.342165	2.71998	0.295392	0.997199	5.15	6.01	9.09	7.11	1.64	2.75	7.55	8.92	4.81	2.77
mml-miR-1180-3p	-0.23438	8.7243	0.296271	0.997199	322.14	376.71	219.28	359.61	209.48	500.2	242.3	482.03	331.75	450.76
mml-miR-7180-5p	0.260283	7.15081	0.298993	0.997199	125.36	106.46	62.33	118.73	111.24	209.14	64.35	65.93	144.61	150.97
mml-miR-660-5p	-0.318607	5.30567	0.299298	0.997199	31.51	36.88	46.09	41.78	14.24	23.94	43.6	29.36	36.73	37.82
mml-miR-450a-1-3p	-0.449966	1.09857	0.302411	0.997199	1.32	1.9	1.62	1.65	1.02	0.98	2.52	0.9	1.53	2.66
mml-miR-338-3p	-0.289001	4.30583	0.303642	0.997199	15.66	18.21	29.54	13.33	5.33	14.45	24.94	15.13	7.98	24.8
mml-miR-133d-3p	-0.653495	5.12208	0.306156	0.997199	18.1	40.33	33.6	8.76	17.82	12.23	13.94	55.71	84.82	6.87
mml-miR-30b-5p	0.212494	10.7088	0.309544	0.997199	1514.06	1338.13	2072.16	1403.39	1388.81	1191.9	1429.18	973.67	1720.07	1229.59
mml-miR-323a-3p	0.297472	5.24092	0.311129	0.997199	35.63	30.23	60.38	35.3	27.15	19.68	55.96	26.45	17.38	21.11
mml-miR-320b	-0.292395	5.33133	0.314128	0.997199	30.14	35.07	16.56	27.43	15.57	61	18.65	33.26	29.51	58.83
mml-miR-148b-3p	-0.226797	9.16908	0.317236	0.997199	446.96	528.62	610.27	444.43	285.59	447.54	468.57	453.97	454.83	737.12
mml-let-7f-3p	0.298284	5.63616	0.319583	0.997199	46.05	38.38	60.22	48.63	33.7	41.67	35	27.85	50.17	40.48
mml-miR-1235	-0.389086	2.92519	0.324203	0.997199	4.79	6.63	0	2.92	5.43	10.82	0	5.61	4.81	16.09
mml-miR-450b-5p	-0.449792	1.21239	0.324882	0.997199	1.51	1.93	2.11	0.89	0.31	2.75	1.78	0.9	1.97	3.07
mml-miR-6505-3p	-0.336759	2.25546	0.327151	0.997199	3.29	4.25	1.62	4.57	3.69	3.28	3.77	2.91	5.9	4.41
mml-miR-1271-5p	0.22792	7.52996	0.327864	0.997199	161.83	147.72	164.25	129.27	252.3	101.51	170.93	85.26	245.51	89.17
mml-miR-18a-3p	0.220433	9.76697	0.330015	0.997199	763.71	657.83	348.31	714.52	670.84	1321.16	354.13	449.56	992.73	834.9
mml-miR-500a-3p	-0.270503	4.66835	0.338483	0.997199	19.65	23.69	19.8	29.84	14.14	14.81	31.65	22.14	17.82	23.16
mml-miR-31-5p	-0.51665	0.880238	0.338788	0.997199	1.07	1.7	0.81	2.41	0.61	0.44	3.77	1.2	1.53	0.31
mml-miR-222-3p	0.243357	7.83162	0.346743	0.997199	204.73	175.92	118.48	264.88	227.81	207.72	169.26	118.63	244.85	170.96
mml-miR-550-5p	-0.464381	1.03274	0.346946	0.997199	1.2	1.68	0.49	0.89	1.64	1.77	1.47	2.4	1.42	1.43
mml-miR-127-3p	0.34324	1.96357	0.350862	0.997199	3.59	2.95	5.68	5.08	1.64	1.95	6.29	1.8	2.19	1.54
mml-miR-371-5p	0.435142	1.14194	0.352176	0.997199	1.76	1.73	3.57	1.14	0.72	1.6	4.93	0.2	0.66	1.13
mml-miR-93-3p	0.220635	11.1224	0.355616	0.997199	1970.34	1741.99	982.93	2528.43	2362.55	2007.46	1382.97	1212.43	2931.74	1440.83
mml-let-7e-5p	-0.261911	4.34013	0.359864	0.997199	15.27	19.17	21.91	17.65	10.35	11.17	26.41	25.75	10.27	14.25
mml-miR-424-5p	-0.298686	5.59687	0.364221	0.997199	37.98	44.88	61.35	35.05	18.03	37.5	45.59	30.56	51.92	51.45
mml-miR-382-3p	0.346443	1.34557	0.369251	0.997199	2.38	1.74	5.19	2.03	0.72	1.6	3.25	1.4	1.09	1.23
mml-miR-138-5p	0.329543	2.48427	0.36981	0.997199	5.37	4.13	5.36	10.67	2.97	2.48	7.55	2.91	3.94	2.15
mml-miR-432-5p	-0.260705	4.5844	0.373249	0.997199	19.94	22.01	41.06	20.32	8.09	10.28	34.79	25.95	10.27	17.01
mml-miR-758-3p	0.349125	1.46766	0.376373	0.997199	2.49	2.07	4.71	3.05	1.23	0.98	4.61	1.2	1.86	0.61
mml-miR-331-5p	0.247947	5.28397	0.381817	0.997199	34.52	29.87	30.51	34.28	40.05	33.25	27.56	25.85	30.28	35.77
mml-miR-449a-5p	0.42322	0.734833	0.382898	0.997199	1.41	1.03	0.49	3.81	0.82	0.53	1.05	2.4	0.55	0.1
mml-miR-7184-3p	-0.380996	0.881096	0.387266	0.997199	1.13	1.48	0.97	1.14	0.61	1.77	0.73	1.9	1.42	1.84
mml-miR-598-3p	-0.330808	1.52117	0.391099	0.997199	2.07	2.45	4.06	1.14	1.13	1.95	3.04	1.7	2.3	2.77
mml-miR-148a-3p	-0.19139	9.2714	0.393671	0.997199	525.62	557.83	934.07	571.54	211.22	385.66	815.46	421.41	398.97	595.48
mml-miR-299-5p	0.219641	6.69573	0.403645	0.997199	94.39	88.76	162.63	93.84	65.66	55.41	179.11	51.2	78.81	45.92
mml-miR-365-3p	-0.24482	3.64376	0.403752	0.997199	9.4	11.25	7.14	12.32	6.45	11.7	13.73	9.72	8.64	12.91
mml-miR-374b-5p	0.219895	6.77812	0.404191	0.997199	98.19	90.97	129.03	102.85	92.09	68.8	152.07	77.95	82.2	51.66
mml-miR-211	0.26112	2.79049	0.405407	0.997199	5.9	5.31	3.73	8.25	7.38	4.26	3.88	3.01	10.06	4.3
mml-miR-7195-3p	0.367603	0.932266	0.406265	0.997199	1.4	1.28	0.81	0.63	2.66	1.51	0.52	0.5	3.17	0.92
mml-miR-204-5p	0.231142	5.03094	0.411374	0.997199	28.25	27.3	38.63	19.94	40.87	13.56	39.93	9.82	45.91	13.53
mml-miR-29c-5p	0.227296	6.41367	0.413833	0.997199	74.55	66.7	52.59	78.47	83.18	83.96	56.7	44.08	93.35	72.67
mml-miR-194-3p	0.371879	0.925167	0.414453	0.997199	1.49	1.22	1.3	1.27	2.25	1.15	0.42	1.7	1.75	1.02
mml-miR-142-3p	-0.258815	14.0817	0.415831	0.997199	13933.8	15904.9	23479	11450.2	5857.62	14948.4	14347	10968.7	22992.5	15311.3
mml-miR-139-5p	0.326457	1.06794	0.417495	0.997199	1.67	1.38	1.62	1.4	1.64	2.04	1.05	1.2	1.42	1.84
mml-miR-501-5p	0.355958	0.892499	0.417902	0.997199	1.42	1.15	0.81	0.76	1.43	2.66	1.05	0.6	0.98	1.95
mml-miR-299-3p	0.285919	1.91104	0.41953	0.997199	3.36	3.08	7.95	2.67	1.74	1.06	8.49	1.4	1.42	1.02
mml-miR-20b-5p	-0.224294	3.91475	0.421133	0.997199	11.93	14.55	19.48	17.78	5.84	4.61	28.93	16.73	7.43	5.12
mml-miR-181a-5p	-0.211782	6.72504	0.42397	0.997199	84.23	93.29	51.13	126.35	54.39	105.06	81.75	94.98	86.35	110.08
mml-miR-330-5p	0.223288	3.66862	0.432991	0.997199	10.85	9.61	6.65	10.41	15.26	11.08	7.13	6.51	13.01	11.79
mml-miR-3200-5p	0.308556	1.97438	0.433728	0.997199	3.19	2.79	2.6	2.41	3.59	4.17	1.47	3.01	1.86	4.82
mml-let-7b-3p	0.228705	6.29933	0.437656	0.997199	68.53	61.98	71.9	60.06	77.54	64.63	41.29	49.09	80.56	76.97
mml-miR-605	0.274028	1.48274	0.444746	0.997199	2.3	1.96	1.95	2.67	2.36	2.22	1.57	2	2.51	1.74
mml-miR-1260b	0.22078	5.8977	0.449524	0.997199	52.38	45.66	35.38	54.86	47.63	71.63	31.13	46.59	56.95	47.97
mml-let-7a-3p	-0.254819	6.99995	0.449754	0.997199	101.87	117.58	171.07	85.33	48.14	102.93	99.14	81.26	168.88	121.04
mml-miR-15a-5p	-0.157153	10.2783	0.454966	0.997199	1066.82	1141.11	1786.5	1449.86	416.09	614.83	2004.97	1154.92	767.89	636.68
mml-miR-769-5p	0.234777	2.36921	0.460541	0.997199	4.48	3.87	5.36	4.83	2.97	4.79	3.46	3.21	5.03	3.79
mml-miR-143-3p	0.422005	2.2275	0.465635	0.997199	4.26	2.87	3.41	1.9	2.05	9.66	1.36	4.11	4.26	1.74
mml-miR-7204-3p	0.197734	6.42919	0.466474	0.997199	76.36	68.36	63.79	96.89	78.46	66.32	60.58	59.21	90.4	63.24
mml-miR-374a-3p	-0.389482	1.02533	0.466963	0.997199	1.34	1.73	2.11	1.52	0.31	1.42	1.47	2	2.62	0.82
mml-miR-889-3p	-0.316964	1.5493	0.468415	0.997199	2.53	2.51	7.3	2.16	0.2	0.44	6.5	1.6	1.2	0.72
mml-miR-18b	-0.225726	4.05004	0.472697	0.997199	13.74	15.09	19.48	21.71	6.25	7.54	21.59	12.72	16.94	9.12
mml-miR-148a-5p	0.24356	3.4719	0.472928	0.997199	9.85	8.38	8.12	10.67	5.12	15.51	10.06	4.21	9.73	9.53
mml-miR-425	0.155053	14.5561	0.480024	0.997199	20559.7	19549	13318.9	23240.4	20892.1	24787.4	14789.4	12333.6	30214.1	20858.7
mml-miR-93-5p	-0.155441	14.62	0.482513	0.997199	20285.8	24322.6	27742.2	30875.5	10924.5	11600.9	46774.2	25707.9	12264.9	12543.5
mml-miR-4677-5p	-0.292892	1.04954	0.487809	0.997199	1.29	1.72	0.65	1.27	2.25	0.98	1.57	1	3.28	1.02
mml-miR-500b-5p	0.187066	3.79738	0.497666	0.997199	12	10.85	9.09	14.09	12.39	12.41	10.38	8.52	13.66	10.86
mml-miR-27a-3p	-0.202487	6.4958	0.499506	0.997199	77.19	79.84	130.66	82.54	23.15	72.43	108.37	61.62	59.79	89.58
mml-miR-486-3p	0.456827	1.23385	0.503831	0.997199	2.08	1.68	3.9	2.54	0.31	1.6	1.05	1	3.94	0.72
mml-miR-500a-5p	0.198739	4.12102	0.504439	0.997199	15.17	13.67	10.55	19.3	13.62	17.2	13.62	9.32	19.02	12.71
mml-miR-937	0.341085	0.816612	0.50589	0.997199	1.35	1.09	0.81	1.14	1.13	2.31	0.73	1.8	1.09	0.72
mml-miR-29b-2-5p	0.192878	3.81572	0.507117	0.997199	12.41	11.16	11.69	16.89	11.58	9.49	14.88	12.32	8.42	9.02
mml-miR-7180-3p	0.177197	4.46447	0.509372	0.997199	19.25	17.32	15.09	25.4	16.29	20.21	15.2	17.63	14.32	22.14
mml-miR-133c-3p	-0.414272	4.0731	0.514209	0.997199	8.72	19.33	13.96	4.7	9.83	6.38	5.87	20.44	48.75	2.25
mml-miR-1296-5p	-0.167282	7.39203	0.515159	0.997199	131.18	151.68	147.54	147.3	86.97	142.91	138.23	211.81	114.23	142.46
mml-miR-376a-1-5p	-0.300464	0.806119	0.518423	0.997199	1.24	1.42	2.92	0.63	0.51	0.89	2.31	0.8	1.64	0.92
mml-miR-7205-3p	-0.200465	5.32255	0.518937	0.997199	30.64	36.63	39.6	23.75	48.14	11.08	38.67	40.18	56.62	11.07
mml-miR-491-5p	0.154998	7.83264	0.519181	0.997199	199.81	178.52	123.68	228.18	183.97	263.4	157.62	157.6	209.87	188.99
mml-miR-140-5p	-0.213219	6.00992	0.519449	0.997199	53.48	59.46	84.72	68.82	25.81	34.58	81.22	38.47	70.5	47.66
mml-miR-134-5p	0.195745	4.82401	0.521192	0.997199	25.95	23.93	38.95	37.33	15.37	12.15	48.1	20.84	10.38	16.4
mml-miR-543-5p	0.253402	1.14037	0.525113	0.997199	1.87	1.58	3.25	2.03	1.13	1.06	2.93	1.4	0.87	1.13
mml-miR-423-5p	-0.158688	12.0595	0.526252	0.997199	3234.93	3821.32	2681.3	3291.58	2930.55	4036.28	2758.18	5448.28	2865.5	4213.33
mml-miR-369-5p	-0.182409	3.66251	0.531105	0.997199	10.32	12.03	22.24	8.76	3.99	6.29	27.14	5.81	7.87	7.28
mml-miR-19b	0.141718	12.3745	0.531268	0.997199	4726.98	4354.03	6329.45	5129.37	3443.24	4005.87	3975.24	3783.78	5891.03	3766.06
mml-miR-502-5p	0.231596	1.58686	0.532031	0.997199	2.49	2.17	2.6	2.92	1.54	2.93	2.41	1.4	2.62	2.25
mml-miR-10a-5p	0.172126	6.23319	0.537838	0.997199	66.95	61.25	73.2	80.38	58.29	55.94	81.96	52.9	56.73	53.4
mml-miR-940	0.291149	0.769806	0.540621	0.997199	1.36	1.04	0.65	2.16	0.51	2.13	0.94	0.7	1.2	1.33
mml-let-7d	-0.137189	10.9854	0.540841	0.997199	1605.2	1848.81	1683.44	2115.49	1126.68	1495.2	2234.17	2452.32	1087.83	1620.91
mml-miR-16-1-3p	-0.303373	2.15107	0.545048	0.997199	3.61	3.93	5.52	6.48	1.02	1.42	5.97	1.6	5.36	2.77
mml-miR-26a-5p	0.123433	11.756	0.550876	0.997199	3023.59	2857.08	3490.39	3188.22	2808.35	2607.4	3622.69	2552.81	2592.45	2660.38
mml-miR-200c-3p	-0.189489	2.9624	0.551611	0.997199	5.81	7.33	7.95	6.86	5.33	3.1	14.15	7.21	4.48	3.48
mml-miR-503-5p	-0.160461	6.66922	0.558081	0.997199	78.23	91.34	70.6	82.66	77.03	82.63	87.3	83.06	70.18	124.83
mml-miR-1249	0.16099	7.30637	0.558159	0.997199	138.49	118.67	96.57	76.44	138.9	242.03	94.64	86.47	156.75	136.83
mml-miR-382-5p	-0.164089	4.96448	0.566701	0.997199	26.1	29.98	54.37	29.84	11.58	8.6	69.27	25.35	11.37	13.94
mml-miR-361-5p	0.128156	11.6617	0.570433	0.997199	2809.55	2595.96	2095.54	3264.79	3210.3	2667.59	2639.02	2513.43	2421.17	2810.22
mml-miR-493-5p	0.195927	2.2455	0.574599	0.997199	4.15	3.94	8.44	4.57	1.74	1.86	9.01	3.91	0.87	1.95
mml-miR-146a-5p	-0.135313	7.52392	0.575828	0.997199	147.62	166.71	160.52	190.47	125.99	113.48	214.32	190.47	126.03	136.01
mml-miR-6827-3p	0.14624	4.44155	0.577952	0.997199	18.66	17.7	19.8	18.67	21.2	14.98	20.54	13.33	23.5	13.43
mml-miR-1255a-5p	-0.233194	0.971922	0.580899	0.997199	1.24	1.55	0.97	1.27	1.13	1.6	0.73	1.4	1.31	2.77
mml-miR-23b-5p	-0.186292	2.52235	0.582168	0.997199	4.38	4.95	6.82	3.43	3.99	3.28	4.82	6.11	4.15	4.71
mml-miR-151-5p	0.144175	6.65056	0.582382	0.997199	89.53	80.99	94.3	118.85	89.22	55.77	84.68	96.18	79.14	63.95
mml-miR-199a-3p	-0.193251	4.37754	0.58333	0.997199	15.88	19.92	21.59	24.38	7.79	9.75	24.1	31.06	19.89	4.61
mml-miR-185-5p	-0.109834	11.5017	0.583495	0.997199	2335.43	2532.33	1731.97	3333.74	1727.76	2548.26	2014.4	2807.3	2088.65	3218.96
mml-miR-374a-5p	-0.181386	6.0417	0.584007	0.997199	57.48	59.13	121.24	52.44	21.92	34.31	93.48	54.71	58.81	29.52
mml-miR-103-3p	-0.116624	12.1011	0.584372	0.997199	3652.89	4018.27	4278.55	5392.73	2299.45	2640.82	6353.3	3543.11	3306.67	2869.97
mml-miR-191-3p	0.143726	6.61982	0.587192	0.997199	87.91	80.52	101.6	121.01	65.46	63.57	99.04	96.29	55.64	71.13
mml-miR-145-5p	-0.228808	2.33666	0.587731	0.997199	3.32	4.65	1.62	3.68	3.28	4.7	2.83	2.91	10.71	2.15
mml-miR-6529-5p	-0.128958	8.07911	0.588398	0.997199	207.11	234.46	137.47	182.85	223.51	284.59	140.12	245.97	224.19	327.56
mml-miR-376c-5p	-0.229692	1.45962	0.59162	0.997199	2.28	2.27	5.36	2.41	0.31	1.06	4.4	1.7	1.86	1.13
mml-miR-154-5p	0.151467	5.53218	0.5938	0.997199	41.76	39.24	74.99	36.44	28.58	27.04	72.63	21.14	33.99	29.21
mml-miR-24-3p	0.110652	9.77205	0.597334	0.997199	774.59	730.45	845.13	1046.57	550.79	655.88	1013.23	643.34	586.11	679.11
mml-miR-628-5p	-0.183071	1.76286	0.598503	0.997199	2.48	2.86	3.08	3.17	0.92	2.75	3.56	3.11	0.87	3.89
mml-miR-376c-3p	0.171183	2.9306	0.604775	0.997199	7.35	5.9	16.23	5.71	1.43	6.03	11.84	3.11	3.72	4.92
mml-miR-29b-3p	-0.120049	7.91639	0.610005	0.997199	193.35	214.08	263.75	145.65	179.06	184.94	209.81	153.29	238.95	254.28
mml-miR-484	0.121092	14.0189	0.611333	0.997199	14696.2	12956.8	6114.89	21871.3	11401.3	19397.1	7727.47	11767.8	18366.9	13965
mml-miR-485-3p	0.119863	8.46923	0.611746	0.997199	316.16	293.16	490	267.04	345.82	161.8	458.19	292.36	248.78	173.31
mml-miR-15b-5p	-0.116793	13.2479	0.614277	0.997199	7841.22	8852	10396	9696.22	5572.44	5700.19	11156.6	11652.6	4778.17	7820.63
mml-miR-377-3p	0.226383	1.64897	0.614299	0.997199	2.95	2.26	6.33	2.79	0.72	1.95	3.35	1	2.73	1.95
mml-miR-140-3p	0.100382	13.3409	0.621379	0.997199	8991.92	8543.16	9425.61	10091.2	9327.59	7123.22	8794.04	7854.61	9377.95	8146.04
mml-miR-324-5p	0.112881	7.97549	0.621821	0.997199	212.76	201.48	155.49	198.85	296.96	199.74	152.8	158.81	259.39	234.91
mml-miR-627-5p	-0.16989	6.05889	0.625441	0.997199	51.89	60.15	64.6	52.82	54.5	35.64	63.82	74.14	36.84	65.8
mml-miR-130b-3p	-0.148509	4.53552	0.626694	0.997199	18.2	20.82	17.37	25.4	16.39	13.65	26.1	24.45	12.35	20.4
mml-miR-186-3p	-0.206131	0.602738	0.628396	0.997199	1.04	1.17	1.62	1.4	0.61	0.53	1.78	1	1.09	0.82
mml-miR-487b-5p	0.16673	2.00416	0.634608	0.997199	3.59	3.09	7.63	2.54	2.05	2.13	5.66	2.81	1.75	2.15
mml-miR-126	0.0992583	9.22273	0.639573	0.997199	546.74	529.52	979.84	777.88	279.85	149.39	1119.39	587.43	247.8	163.47
mml-miR-99b-5p	0.137302	5.95868	0.64432	0.997199	53.69	50.08	54.53	45.84	65.97	48.41	61.52	40.08	49.52	49.2
mml-miR-296-3p	-0.140008	4.22135	0.646642	0.997199	14.42	16.67	18.34	14.09	9.83	15.43	18.34	22.64	9.29	16.4
mml-miR-1185-3p	0.195329	1.02192	0.650864	0.997199	1.69	1.52	2.92	2.41	0.72	0.71	3.35	1	1.09	0.61
mml-miR-194-5p	0.0988896	8.15765	0.651644	0.997199	248.52	235.64	303.67	250.41	261.11	178.91	255.4	192.47	270.54	224.15
mml-miR-100-5p	0.19847	1.30343	0.659537	0.997199	1.91	1.68	1.14	1.65	1.02	3.81	0.52	1.4	2.62	2.15
mml-miR-151-3p	0.110009	10.691	0.659815	0.997199	1455.17	1297.63	1228.66	1646.17	2162.5	783.37	1209.1	1522.93	1367.99	1090.51
mml-miR-33b-5p	0.236074	0.98472	0.660109	0.997199	1.73	1.28	1.46	3.56	0.31	1.6	1.68	1	1.64	0.82
mml-miR-582-3p	0.144854	3.15798	0.662468	0.997199	8.85	6.81	20.13	8.76	0.31	6.21	12.68	6.41	0.66	7.48
mml-miR-191-5p	0.120131	16.7165	0.663333	0.997199	92696.4	85314.5	80780.9	88697.9	132865	68441.6	78785.5	109184	72208.1	81080.7
mml-miR-3200-3p	-0.10538	7.76491	0.664757	0.997199	168.96	191.45	147.54	170.79	154.06	203.47	151.54	190.17	144.07	280.01
mml-miR-9-5p	0.135444	2.28104	0.665216	0.997199	3.96	3.87	4.87	3.43	3.99	3.55	4.09	2.1	5.9	3.38
mml-miR-138-3p	0.137464	3.05701	0.67096	0.997199	6.98	6.62	6.33	10.03	6.04	5.5	5.76	9.92	3.61	7.17
mml-miR-190b	-0.115943	4.15565	0.679313	0.997199	14.89	15.94	16.72	25.78	9.53	7.54	25.26	17.53	12.24	8.71
mml-miR-30c-1-3p	0.115126	5.01868	0.682053	0.997199	28.07	26.18	25.16	36.19	28.78	22.16	26.72	29.06	24.05	24.91
mml-miR-501-3p	0.205479	0.877567	0.687297	0.997199	1.43	1.27	2.11	1.27	1.43	0.89	0.42	1.8	1.31	1.54
mml-miR-1306-5p	-0.135205	8.03835	0.691475	0.997199	199.43	228.34	163.93	140.57	284.97	208.25	156.15	336.35	182.65	238.19
mml-miR-6505-5p	0.182964	0.772536	0.692822	0.997199	1.27	1.16	1.14	1.52	1.43	0.98	0.84	1.9	0.77	1.13
mml-miR-148b-5p	-0.109335	3.83883	0.694116	0.997199	11.26	12.38	13.31	7.87	9.83	14.01	14.57	9.02	13.01	12.91
mml-miR-337-5p	-0.146864	2.01376	0.697345	0.997199	3.59	3.47	9.74	3.05	0.41	1.15	9.01	1.9	1.2	1.74
mml-miR-532-3p	0.0946193	9.83787	0.698299	0.997199	777.07	733.87	644.52	744.36	1094.92	624.5	602.09	887.61	776.41	669.37
mml-miR-185-3p	-0.112092	4.05786	0.698419	0.997199	12.76	14.35	10.55	13.21	10.35	16.93	10.17	17.03	10.82	19.37
mml-miR-671-5p	0.130855	4.41442	0.698897	0.997199	18.38	17.72	14.61	29.33	12.8	16.76	14.67	11.22	31.15	13.84
mml-miR-188-5p	-0.145346	1.58004	0.700438	0.997199	2.16	2.47	1.62	3.3	1.95	1.77	1.99	1.8	3.94	2.15
mml-miR-130b-5p	0.107152	6.23418	0.700447	0.997199	64.32	60.72	45.93	76.44	52.65	82.27	44.75	53	73.67	71.44
mml-miR-186-5p	0.0767261	11.912	0.705669	0.997199	3236.03	3237.88	3294.65	3172.73	3087.38	3389.35	2990.31	2124.39	3966.12	3870.7
mml-miR-92b-5p	-0.144033	1.29813	0.707225	0.997199	1.71	1.96	1.46	1.9	1.33	2.13	1.26	1.5	2.4	2.66
mml-miR-122a-5p	-0.227416	5.30595	0.708873	0.997199	27.83	38.89	39.77	38.98	7.38	25.18	10.38	81.76	49.3	14.14
mml-miR-376a-3p	-0.121694	4.07735	0.7101	0.997199	15.94	14.09	38.79	12.95	4.4	7.62	25.05	8.72	10.93	11.68
mml-miR-92b-3p	0.0836187	8.08232	0.710202	0.997199	223.68	218.05	167.34	113.65	306.89	306.84	162.23	112.92	355.58	241.47
mml-miR-4446-5p	-0.118465	2.27453	0.711683	0.997199	3.7	4.1	4.87	3.56	2.56	3.81	5.24	4.51	2.95	3.69
mml-miR-210-3p	-0.0758714	8.78067	0.714661	0.997199	376.71	399.97	520.03	573.32	242.67	170.84	676.39	406.08	334.04	183.36
mml-miR-505-5p	-0.117117	2.67749	0.714987	0.997199	4.86	5.31	5.68	2.29	5.02	6.47	5.45	4.01	4.59	7.17
mml-let-7i-3p	0.0970952	4.72971	0.717396	0.997199	22.81	21.78	20.94	29.97	21.2	19.15	21.48	19.44	27.44	18.76
mml-let-7g-3p	-0.131302	1.99964	0.717644	0.997199	3.06	3.45	4.71	3.17	1.95	2.39	3.98	2.2	5.14	2.46
mml-miR-362-5p	-0.100109	4.65999	0.724886	0.997199	19.86	21.95	14.28	21.33	17.21	26.6	20.02	14.63	29.08	24.09
mml-miR-17-3p	-0.141634	2.47385	0.725191	0.997199	4.43	4.54	2.27	8.13	1.84	5.5	3.35	3.11	6.78	4.92
mml-let-7a-5p	-0.0878541	14.2509	0.728985	0.997199	15597.8	17794.6	18140.2	19843.8	13764.1	10643.1	24617.9	24297.5	9848.74	12414.3
mml-miR-370-3p	-0.103848	4.52397	0.730864	0.997199	18.71	21.68	36.19	18.67	10.65	9.31	44.12	23.14	8.2	11.27
mml-miR-411-5p	-0.169308	0.859791	0.734459	0.997199	1.51	1.44	4.54	1.02	0.31	0.18	3.77	0.5	1.09	0.41
mml-miR-339-3p	0.0727661	9.72943	0.735528	0.997199	706.74	721.59	663.99	689.38	653.33	820.25	715.48	407.58	1019.73	743.58
mml-miR-363-3p	-0.0921707	4.23337	0.735787	0.997199	15.92	16.61	26.13	18.67	7.89	10.99	25.15	17.93	13.12	10.25
mml-let-7f-5p	-0.0850003	12.069	0.737668	0.997199	3521.56	3926.16	4886.39	4629.7	2823.51	1746.63	5878.13	5407.2	1924.36	2494.96
mml-miR-340-3p	0.081352	7.15663	0.7421	0.997199	123.54	118.18	152.73	130.79	123.74	86.88	111.19	110.91	145.16	105.46
mml-miR-144	-0.162152	6.43249	0.74321	0.997199	80.51	72.93	172.04	91.55	14.55	43.89	72.21	75.85	106.47	37.2
mml-miR-361-3p	0.0681597	11.9425	0.745014	0.997199	3372.18	3175.09	2173.93	4478.6	4728.28	2107.9	2172.44	3534.8	4331.32	2661.81
mml-miR-550-3p	0.0955779	2.59501	0.746284	0.997199	4.93	4.67	3.41	5.46	4.2	6.65	4.09	4.31	5.25	5.02
mml-miR-296-5p	0.0723351	10.5077	0.747709	0.997199	1228.17	1203.65	998.35	1317.29	1414.11	1182.95	1183.74	1347.69	1383.07	900.08
mml-miR-192-3p	-0.130997	1.75261	0.749361	0.997199	2.39	2.79	1.3	2.79	2.56	2.93	4.3	2.3	2.4	2.15
mml-miR-502-3p	-0.0897451	4.82099	0.752329	0.997199	22.98	24.77	21.1	29.84	15.98	25	29.24	19.94	27.76	22.14
mml-miR-130a-3p	-0.0951486	3.30195	0.753295	0.997199	7.89	8.61	9.41	10.79	6.04	5.32	11.42	10.02	4.81	8.2
mml-miR-342-5p	-0.106203	2.12388	0.754307	0.997199	3.26	3.54	1.95	5.08	1.95	4.08	1.68	5.61	3.06	3.79
mml-miR-106b-5p	-0.0983231	5.63833	0.756971	0.997199	43.09	44.17	61.68	58.92	15.16	36.62	72.1	39.08	36.51	29.01
mml-miR-205	-0.108967	1.39062	0.760798	0.997199	1.92	2.12	2.27	2.16	1.74	1.51	2.41	1.9	2.4	1.74
mml-miR-1226	0.0805274	8.24788	0.761463	0.997199	248.55	247.82	200.94	206.22	328.51	258.52	135.93	296.47	267.91	290.97
mml-miR-34a-5p	-0.0912168	6.16159	0.766515	0.997199	58.64	65.97	63.46	95.36	21.92	53.81	113.08	65.73	21.32	63.75
mml-miR-942-5p	0.0606249	11.5233	0.766872	0.997199	2431.44	2412.05	1595.15	2457.32	3037.08	2636.21	1600.12	1997.14	2988.58	3062.35
mml-miR-92a-3p	0.0622968	17.0477	0.771206	0.997199	112755	110236	84334.6	100511	114740	151436	79153.1	106660	120975	134155
mml-miR-330-3p	-0.100575	1.72683	0.771484	0.997199	2.44	2.64	1.79	3.3	1.74	2.93	1.89	3.61	2.3	2.77
mml-miR-15a-3p	-0.117684	2.03249	0.77265	0.997199	3.12	3.57	5.19	3.05	1.74	2.48	3.46	1.9	6.34	2.56
mml-miR-1284	0.0952758	1.90556	0.775751	0.997199	2.92	2.83	1.95	2.54	3.99	3.19	2.52	2.1	3.61	3.07
mml-miR-27b-3p	-0.0641896	8.14073	0.7779	0.997199	238.19	248.2	349.61	269.07	168.2	165.88	322.89	243.17	175.22	251.51
mml-miR-656-3p	-0.14019	0.600756	0.778342	0.997199	1.2	1.06	3.08	0.63	0.2	0.89	1.36	1.1	0.66	1.13
mml-miR-107-3p	-0.0700802	7.59485	0.779044	0.997199	165.41	171.51	191.2	251.8	98.23	120.4	247.44	142.37	166.26	129.96
mml-miR-28-3p	0.0806646	7.96528	0.782438	0.997199	212.76	200.97	203.05	175.61	301.36	171.02	217.46	192.47	160.46	233.48
mml-miR-3140	-0.110822	1.54892	0.786867	0.997199	2.06	2.41	1.62	2.16	2.15	2.31	2.93	2.5	3.06	1.13
mml-miR-1304	-0.0864798	5.53873	0.787182	0.997199	38.44	40.41	35.71	56	44.87	17.2	51.25	54.61	31.7	24.09
mml-miR-10b-5p	-0.100091	2.70796	0.79114	0.997199	4.79	5.85	4.06	6.35	3.18	5.59	3.88	3.21	11.7	4.61
mml-miR-181b-5p	-0.0818664	5.33519	0.793493	0.997199	33.55	34.08	18.18	51.55	24.38	40.07	30.39	29.66	42.85	33.41
mml-miR-199a-5p	-0.0834015	3.49177	0.795582	0.997199	8.57	10.26	10.06	10.16	7.68	6.38	8.7	8.62	19.02	4.71
mml-miR-223	-0.0570787	15.2977	0.795796	0.997199	33370.3	35792.3	46583.3	37040.8	22798.7	27058.2	46422.8	32401	21200	43145.3
mml-miR-671-3p	-0.0559539	8.09327	0.798706	0.997199	216.85	232.07	157.92	171.3	290.91	247.26	174.6	176.54	330.66	246.49
mml-miR-125a-5p	0.0560993	8.87771	0.798721	0.997199	397.24	385.94	362.43	386.91	535.43	304.18	355.7	396.66	458	333.41
mml-miR-190a-5p	-0.0774135	5.00868	0.805743	0.997199	26.88	30.25	68.01	5.46	17.11	16.93	60.68	3.91	41.86	14.55
mml-miR-128a-3p	0.0553356	12.257	0.806212	0.997199	4145.51	4045.15	4047.75	3984.26	5297.92	3252.11	4382.5	3339.72	4045.92	4412.47
mml-miR-379-5p	0.081348	3.06579	0.806832	0.997199	6.92	8.03	16.72	5.97	2.15	2.84	22.95	5.21	2.51	1.43
mml-miR-128b-3p	0.0550762	12.0364	0.807948	0.997199	3544.62	3468.73	3378.4	3313.68	4616.42	2870	3648.26	2732.15	3583.44	3911.08
mml-miR-196a-5p	-0.0654307	7.85843	0.809515	0.997199	190.9	214	275.6	238.09	202.82	47.08	376.34	281.74	144.72	53.19
mml-miR-106a-5p	0.0669492	5.37121	0.812486	0.997199	37.02	35.46	50.96	56.51	17.11	23.49	57.54	42.48	23.17	18.65
mml-miR-210-5p	0.106157	1.46587	0.815349	0.997199	2.05	2.15	2.6	1.27	2.56	1.77	1.15	2.71	3.83	0.92
mml-miR-6790-3p	-0.0622192	4.40719	0.817903	0.997199	16.78	17.86	10.55	18.16	21.31	17.11	13.52	14.83	22.08	21.01
mml-miR-342-3p	0.0535303	9.99687	0.821146	0.997199	873.15	851.1	669.35	1291.14	869.67	662.44	886.42	1165.54	617.37	735.07
mml-miR-187-3p	-0.0476724	9.30961	0.824798	0.997199	539.54	581.89	832.63	724.42	222.28	378.83	1086.69	509.48	229.98	501.39
mml-miR-4677-3p	-0.0697273	1.90811	0.829167	0.997199	2.85	3.09	3.08	3.3	3.07	1.95	2.83	2.81	4.48	2.25
mml-miR-486-5p	0.0492094	17.5852	0.832164	0.997199	162210	161004	132028	126527	187132	203152	112202	160611	200992	170210
mml-miR-532-5p	0.0539834	7.04328	0.836475	0.997199	114.81	110.66	102.58	166.22	120.77	69.68	146.51	99.99	114.77	81.38
mml-miR-7186-5p	0.0575147	5.56509	0.838377	0.997199	39.96	39.9	44.47	38.86	43.43	33.07	49.99	32.56	45.47	31.57
mml-miR-424-3p	-0.0557932	4.70832	0.839341	0.997199	20.51	22.06	14.93	18.79	18.95	29.35	16.35	19.14	19.13	33.62
mml-miR-503-3p	0.0643064	5.67785	0.84196	0.997199	42.73	40.85	29.54	36.32	60.64	44.42	38.99	34.27	37.27	52.89
mml-miR-197-3p	0.0462597	12.0246	0.842306	0.997199	3429.92	3400.03	2532.79	2760.55	3798.27	4628.06	2226.2	3532.59	4206.16	3635.18
mml-miR-132-3p	0.0573839	2.89821	0.843365	0.997199	6.29	6.02	5.68	9.52	4.81	5.14	6.81	5.91	6.34	5.02
mml-miR-30c-2-3p	-0.0800012	1.3408	0.843637	0.997199	2	2.05	3.57	3.05	0.31	1.06	3.46	3.41	0.33	1.02
mml-miR-636	-0.0541015	4.76679	0.844056	0.997199	21.27	22.57	11.2	18.41	24.89	30.59	12.16	19.74	27.22	31.16
mml-miR-499-5p	0.084767	1.11422	0.846052	0.997199	1.69	1.62	1.79	2.79	0.92	1.24	1.78	1.8	2.3	0.61
mml-miR-98	0.0592507	5.61595	0.847906	0.997199	41.86	42.6	47.39	63.24	32.16	24.65	63.41	58.21	22.74	26.03
mml-miR-335-3p	0.0656431	4.87046	0.847986	0.997199	23.68	23.95	15.74	19.3	11.17	48.5	15.2	7.82	29.73	43.05
mml-miR-7186-3p	0.0520511	6.30056	0.852067	0.997199	66.53	66.56	92.03	45.71	81.23	47.17	72.52	37.97	99.58	56.17
mml-miR-30d-5p	0.0392999	13.3009	0.853213	0.997199	8530.4	8498.49	8777.84	8954.4	9376.35	7013.02	9812.19	7282.91	8348.71	8550.17
mml-miR-21-3p	0.0808001	0.981496	0.854518	0.997199	1.58	1.47	2.6	2.03	0.61	1.06	2.1	1.4	1.75	0.61
mml-miR-491-3p	-0.0548515	3.95411	0.85569	0.997199	12.75	13.49	15.42	17.02	9.53	9.04	12.47	9.72	19.57	12.2
mml-miR-590-3p	-0.0677612	1.50643	0.856625	0.997199	2.15	2.37	3.25	2.54	1.84	0.98	4.09	2.71	1.75	0.92
mml-miR-19a-3p	-0.0578979	6.93662	0.85987	0.997199	106.86	107.37	180	126.98	47.43	73.05	118.22	101.09	150.74	59.45
mml-miR-7172-3p	-0.0918303	0.681474	0.861367	0.997199	1.12	1.14	0.65	1.52	1.84	0.44	1.57	1.1	0.66	1.23
mml-miR-4766-3p	-0.0490027	4.91504	0.861611	0.997199	23.99	26.27	25.64	22.98	18.95	28.37	20.86	16.73	33.99	33.51
mml-miR-135a-5p	-0.0751097	1.49785	0.865055	0.997199	1.94	2.37	2.11	1.78	1.23	2.66	1.89	0.5	3.61	3.48
mml-miR-187-5p	-0.0552614	5.7874	0.865159	0.997199	45.61	50.69	87.97	40.13	17.11	37.24	87.72	51.9	11.91	51.25
mml-miR-152-3p	0.051401	2.69432	0.866698	0.997199	5.45	5.19	7.63	5.33	5.74	3.1	5.45	4.31	5.68	5.33
mml-miR-125b-5p	0.0368318	9.01535	0.867543	0.997199	440.04	417.9	253.52	549.95	638.78	317.92	331.28	392.35	560.64	387.32
mml-miR-155	-0.0463171	7.45558	0.867543	0.997199	142.37	158.64	155.81	194.91	128.04	90.7	228.68	219.42	90.73	95.73
mml-miR-576-5p	-0.0560872	5.94692	0.869306	0.997199	51.13	54.16	47.39	83.43	30.42	43.26	35.63	50.2	86.03	44.79
mml-let-7c-5p	-0.0451463	6.53405	0.871182	0.997199	75.68	81.33	78.07	95.49	59.92	69.24	96.31	104.5	55.42	69.08
mml-miR-3146	0.0652166	1.71998	0.872173	0.997199	2.52	2.49	2.6	1.52	3.48	2.48	2.2	2	1.86	3.89
mml-miR-933	0.0735382	1.44595	0.875163	0.997199	1.93	1.97	0.16	0.63	4.81	2.13	0.94	0.1	4.15	2.66
mml-miR-1240	0.0515506	4.01491	0.876546	0.997199	13.1	12.8	8.93	11.17	21.41	10.9	7.34	17.03	14.21	12.61
mml-miR-30e-5p	0.0341524	10.4672	0.878801	0.997199	1208.6	1227.51	1615.6	1324.66	938.71	955.45	1383.49	785.51	1689.57	1051.46
mml-miR-150-5p	-0.035448	14.6295	0.879536	0.997199	20665.5	21939.1	17453.1	26253.3	21003.7	17951.7	22766.3	29895.1	16804.3	18290.6
mml-miR-16-5p	-0.0349203	16.3079	0.880777	0.997199	68405.9	73768.5	104698	84990.7	49573.5	34361	129075	83443.5	37911.8	44644.1
mml-miR-196b-5p	0.0417356	3.05938	0.885033	0.997199	7.18	7.12	12.17	8.63	4.2	3.72	13	7.31	4.48	3.69
mml-miR-339-5p	-0.0296318	14.5505	0.885834	0.997199	19184.5	21100.3	18223.2	18772	20704.7	19038.1	17587.9	14026.7	32844.4	19942.1
mml-miR-181a-3p	-0.0465883	4.14584	0.887816	0.997199	15.11	14.97	16.88	21.97	6.25	15.34	15.62	10.12	16.83	17.32
mml-miR-584-5p	0.0326162	9.17652	0.888298	0.997199	509.23	478.27	337.27	885.94	425.21	388.49	541.62	553.87	409.36	408.22
mml-miR-7172-5p	-0.0481497	2.26715	0.888778	0.997199	3.68	3.76	2.6	2.79	2.25	7.09	2.72	2.3	4.7	5.33
mml-miR-17-5p	0.0311972	7.80297	0.889487	0.997199	197.52	195.19	271.7	292.94	113.91	111.53	323.31	211.01	137.18	109.26
mml-miR-18a-5p	0.053807	3.39402	0.890352	0.997199	9.35	8.6	11.69	14.22	2.97	8.51	10.27	7.21	11.7	5.23
mml-miR-26b-5p	0.0364688	10.3985	0.892018	0.997199	1140.39	1176.89	1266.31	1641.09	1057.84	596.31	1611.33	1747.66	606.22	742.35
mml-miR-4766-5p	0.0478435	2.12359	0.89381	0.997199	3.54	3.53	3.9	4.95	3.28	2.04	5.55	3.51	2.08	2.97
mml-miR-3122	-0.0390086	3.58877	0.894511	0.997199	10.16	9.92	7.47	17.52	9.63	6.03	9.64	10.32	10.49	9.22
mml-miR-142-5p	-0.0339971	12.7689	0.895821	0.997199	5861.61	6096.83	8208.15	6655.42	3981.22	4601.64	4675.11	5569.41	8965.31	5177.47
mml-miR-183-5p	-0.0421564	2.24636	0.896528	0.997199	3.8	3.92	3.73	6.1	3.18	2.22	5.14	4.91	2.95	2.66
mml-miR-378d	-0.0357697	3.91236	0.897067	0.997199	12.31	12.7	9.58	16.89	10.45	12.32	13.94	11.82	12.13	12.91
mml-miR-146b-5p	-0.0404594	2.45998	0.897471	0.997199	4.38	4.53	4.87	5.33	2.25	5.05	4.4	3.01	4.37	6.35
mml-miR-30e-3p	0.0263627	8.60924	0.899861	0.997199	325.35	328.85	360.48	279.36	376.45	285.12	322.37	247.78	381.7	363.54
mml-miR-20a-3p	-0.042511	2.39968	0.900119	0.997199	4.25	4.61	5.36	6.6	2.56	2.48	8.49	3.31	4.48	2.15
mml-miR-376b-5p	-0.0607231	1.17813	0.900722	0.997199	2.02	1.7	5.52	1.4	0.2	0.98	3.46	0.9	1.64	0.82
mml-miR-628-3p	-0.0367754	3.19043	0.905091	0.997199	7.26	7.77	8.6	6.6	7.27	6.56	10.38	8.32	6.23	6.15
mml-miR-660-3p	0.0361795	2.33078	0.905789	0.997199	3.92	4.04	3.41	3.94	4.71	3.63	2.72	3.41	6.12	3.89
mml-miR-192-5p	-0.0255115	9.15098	0.908099	0.997199	465.19	493.57	543.24	477.45	463.62	376.44	378.86	407.78	679.68	507.95
mml-miR-373	0.0432077	1.67116	0.909988	0.997199	2.33	2.67	3.57	1.52	1.02	3.19	4.93	0.8	0.66	4.3
mml-miR-20a-5p	-0.0384047	6.09497	0.912597	0.997199	59.83	60.96	83.1	90.92	24.17	41.14	98.62	48.99	67.11	29.11
mml-miR-181c-3p	0.0463283	1.88187	0.913244	0.997199	3.09	2.94	5.03	3.56	0.92	2.84	3.98	1.1	3.5	3.18
mml-miR-199a	0.0315933	3.71731	0.919091	0.997199	10.51	11.57	12.17	12.19	9.53	8.16	9.96	7.82	21.75	6.76
mml-miR-942-3p	0.0384053	2.89326	0.919255	0.997199	5.52	5.94	1.79	5.59	7.79	6.92	1.36	9.72	4.26	8.4
mml-miR-331-3p	0.0217877	11.9043	0.921517	0.997199	3152.44	3184.6	2557.3	3007.53	4032.03	3012.91	2396.72	3406.05	3805.11	3130.51
mml-miR-1255b	-0.0313742	2.40362	0.923586	0.997199	4.23	4.34	5.19	4.44	4.61	2.66	5.03	4.21	3.5	4.61
mml-miR-584-3p	0.0301757	5.42697	0.92587	0.997199	34.03	35.6	23.53	29.71	40.67	42.2	17.08	45.29	36.07	43.97
mml-miR-25	0.0214837	15.9644	0.928124	0.997199	53397.5	53532.8	49904.4	54240.5	65155.7	44289.5	57955.2	49912	45945.6	60318.6
mml-miR-451	0.0244002	15.5202	0.932947	0.997199	41756.4	38943.9	59925.4	40119.6	15412.4	51568.1	40849.4	25372.4	47187	42366.8
mml-miR-182	0.0267643	4.96318	0.93736	0.997199	27.15	24.68	24.02	34.67	39.64	10.28	21.38	31.56	24.38	21.42
mml-miR-26b-3p	0.0213848	6.5442	0.93881	0.997199	78.18	78.69	90.89	76.44	78.46	66.94	83.11	82.96	68.75	79.94
mml-miR-221-5p	0.0196994	2.91145	0.945122	0.997199	6.15	6.19	6.49	7.36	5.43	5.32	7.13	6.31	5.47	5.84
mml-miR-221-3p	-0.0179311	11.0055	0.9477	0.997199	1792.93	1760.36	1231.58	3167.65	1217.64	1554.86	2355.32	1418.43	1951.8	1315.89
mml-miR-431	-0.0181267	4.30524	0.953411	0.997199	17.15	17.96	28.4	23.49	4.92	11.79	40.56	10.52	9.29	11.48
mml-miR-30a-3p	-0.0156883	4.56792	0.954468	0.997199	20.06	20.98	31.81	22.48	10.96	14.98	36.05	19.64	10.71	17.53
mml-miR-423-3p	0.0109496	12.9556	0.960106	0.997199	6511.77	6500.51	4487.77	5072.1	6200.88	10286.3	4258.63	5606.88	8118.62	8017.93
mml-miR-7194-3p	0.0157295	2.27688	0.962516	0.997199	3.91	3.91	4.87	4.7	2.97	3.1	2.72	3.51	4.59	4.82
mml-miR-1255a-3p	-0.0125572	3.22507	0.964843	0.997199	7.42	7.99	8.76	6.6	7.68	6.65	8.28	4.51	11.37	7.79
mml-miR-150-3p	0.0128877	1.81261	0.971292	0.997199	2.77	2.72	1.62	4.7	2.36	2.39	2.93	3.51	1.86	2.56
mml-miR-149-5p	0.0142056	1.26955	0.971333	0.997199	1.87	1.8	1.46	3.81	0.72	1.51	1.15	3.61	1.09	1.33
mml-let-7g-5p	-0.00737822	11.4966	0.971787	0.997199	2478.34	2586.34	3541.52	3502.5	1480.28	1389.07	4177.2	3270.19	1435.32	1462.66
mml-miR-30a-5p	0.00806206	6.55128	0.975277	0.997199	84.63	83.16	164.09	104.63	23.87	45.92	166.64	86.67	26.45	52.89
mml-miR-551a	0.0122188	1.10928	0.978144	0.997199	1.68	1.6	0.65	4.06	1.64	0.35	0.94	2.3	2.95	0.2
mml-miR-454-3p	0.00534201	8.18274	0.980847	0.997199	251.58	256.56	309.36	391.61	167.69	137.68	409.99	302.68	166.91	146.67
mml-miR-421	0.00728374	6.38031	0.981076	0.997199	68.72	69.96	73.52	61.71	80.41	59.22	68.33	66.53	60.23	84.76
mml-miR-652	0.00505023	8.07153	0.983032	0.997199	225.09	225.65	165.07	259.04	184.48	291.77	221.76	187.16	270.65	223.02
mml-miR-324-3p	-0.00447671	7.72579	0.984994	0.997199	171.92	177.91	127.9	182.6	195.34	181.84	124.61	204.89	202.77	179.36
mml-miR-7165-3p	-0.00479625	2.52198	0.986808	0.997199	4.62	4.56	3.73	6.1	2.46	6.21	3.88	4.51	3.83	6.05
mml-miR-99a-5p	-0.0030523	4.86872	0.991108	0.997199	23.73	24.14	12.5	29.08	19.56	33.78	15.09	17.73	29.29	34.44
mml-miR-378a	0.00211686	6.49327	0.994303	0.997199	76.26	76.87	60.7	108.7	61.36	74.29	91.28	59.21	85.04	71.95
mml-miR-505-3p	0.00159331	6.36606	0.996391	0.997199	67.51	69.38	88.94	38.86	63.61	78.64	69.59	61.42	43.4	103.11
mml-miR-106b-3p	-0.000888503	11.3686	0.996424	0.997199	2219.85	2226.32	1662.66	2986.83	1887.66	2342.22	1971.12	2195.72	2331.43	2407.02
mml-miR-381-3p	-0.0011067	5.14779	0.997199	0.997199	31.33	32.41	67.52	29.33	14.55	13.92	72.52	12.92	26.78	17.42

## Sheet: E. PairedDE_miRNA_Grp5_Grp1
PairedDE_miRNA_Group5_vs_Group1_1
names	logFC	logCPM	PValue	FDR	Group5	Group1	Group5:3	Group5:11	Group5:15	Group5:26	Group1:2	Group1:10	Group1:18	Group1:30
mml-miR-16-2-3p	1.20839	8.01986	4.46926e-07	0.000154189	326.76	114.74	105.15	59.32	862.7	279.87	70.64	41.88	273.05	73.38
mml-miR-133d-3p	-1.73182	4.85927	5.24725e-06	0.00090515	8.28	40.33	7.3	6.54	13.65	5.61	13.94	55.71	84.82	6.87
mml-miR-1262-5p	-1.3661	1.93183	4.67012e-05	0.00537064	1.55	4.41	1.22	1.35	0.94	2.67	3.25	2.61	1.86	9.94
mml-miR-33b-5p	1.3701	1.68549	0.000733469	0.0632617	3.72	1.28	2.07	1.13	7.45	4.23	1.68	1	1.64	0.82
mml-miR-206	-1.83474	0.652066	0.00112779	0.0778172	0.45	1.75	0	0.56	0.31	0.92	0.84	2.81	2.73	0.61
mml-miR-16-1-3p	0.892893	2.79429	0.00286754	0.142338	7.51	3.93	6.69	3.05	15.54	4.78	5.97	1.6	5.36	2.77
mml-miR-338-3p	-0.728116	4.09191	0.0032663	0.142338	10.22	18.21	12.41	11.05	6.09	11.31	24.94	15.13	7.98	24.8
mml-miR-133c-3p	-1.39494	3.81727	0.00330059	0.142338	4.3	19.33	4.5	3.38	6.09	3.22	5.87	20.44	48.75	2.25
mml-miR-17-3p	0.761223	2.94847	0.0039548	0.147999	8.08	4.54	4.5	3.61	14.17	10.03	3.35	3.11	6.78	4.92
mml-miR-138-5p	0.861911	2.77773	0.00428982	0.147999	7.16	4.13	7.91	4.4	11.65	4.69	7.55	2.91	3.94	2.15
mml-miR-877-3p	0.603575	3.98684	0.00716038	0.224576	15.5	10.66	9.74	13.76	21.21	17.29	5.97	8.52	15.85	12.3
mml-miR-1262-3p	-0.854184	3.36124	0.0112902	0.324593	5.15	11.48	4.87	7.11	2.83	5.79	7.23	10.52	3.17	25.01
mml-miR-378a	0.577787	6.87309	0.0126679	0.32799	121.67	76.87	87.14	64.96	208.4	126.19	91.28	59.21	85.04	71.95
mml-miR-142-3p	-0.537807	13.9167	0.0151761	0.32799	10361.8	15904.9	11170.8	10684.1	8373.3	11218.9	14347	10968.7	22992.5	15311.3
mml-miR-101-1-5p	1.06746	0.841405	0.0162617	0.32799	1.82	0.79	0.85	0.68	4.83	0.92	0.84	0.5	1.53	0.31
mml-miR-1306-3p	1.01194	0.885819	0.0168127	0.32799	1.8	0.85	0.61	1.35	2.94	2.3	0.63	1	0.66	1.13
mml-miR-1249	0.413333	7.35121	0.0171006	0.32799	156.21	118.67	104.18	120	212.39	188.27	94.64	86.47	156.75	136.83
mml-miR-26b-5p	-0.439554	10.2735	0.0171125	0.32799	875.27	1176.89	1092.19	1491.83	505.21	411.86	1611.33	1747.66	606.22	742.35
mml-miR-26a-5p	-0.390442	11.5232	0.0202542	0.367774	2137.05	2857.08	2772.35	2124.63	1752.9	1898.33	3622.69	2552.81	2592.45	2660.38
mml-miR-23b-5p	0.591043	2.92426	0.022575	0.389418	7.33	4.95	6.45	8.23	8.92	5.7	4.82	6.11	4.15	4.71
mml-miR-142-5p	0.390011	13.0277	0.0242661	0.398657	7996.97	6096.83	5723.6	5470.21	12612.2	8181.84	4675.11	5569.41	8965.31	5177.47
mml-miR-4446-5p	0.529389	2.60613	0.0294549	0.422074	5.79	4.1	7.79	5.75	4.2	5.43	5.24	4.51	2.95	3.69
mml-miR-18a-5p	0.588008	3.67991	0.0295806	0.422074	12.72	8.6	9.86	8.01	19.21	13.8	10.27	7.21	11.7	5.23
mml-miR-210-3p	0.436105	9.04498	0.0323688	0.422074	495.09	399.97	587.84	454.72	637.7	300.11	676.39	406.08	334.04	183.36
mml-miR-374b-5p	-0.414517	6.53232	0.0366808	0.422074	67.75	90.97	121.34	60.34	38.74	50.59	152.07	77.95	82.2	51.66
mml-miR-181b-5p	0.461398	5.63583	0.0373509	0.422074	49.26	34.08	27.14	33.38	78.95	57.58	30.39	29.66	42.85	33.41
mml-miR-221-3p	0.525827	11.3612	0.0378151	0.422074	2710.34	1760.36	1890.58	1401.05	5024.78	2524.94	2355.32	1418.43	1951.8	1315.89
mml-miR-450a-1-3p	0.835302	1.81019	0.0380638	0.422074	3.6	1.9	2.19	1.58	7.03	3.59	2.52	0.9	1.53	2.66
mml-miR-30a-5p	-0.391845	6.44632	0.0386349	0.422074	65.67	83.16	129.98	71.73	13.33	47.64	166.64	86.67	26.45	52.89
mml-miR-323b-3p	0.3888	6.37276	0.0413641	0.422074	79.63	63.56	155.66	47.48	66.98	48.38	129.33	50.4	40.99	33.51
mml-miR-148a-3p	0.364995	9.51042	0.0452608	0.422074	685.72	557.83	805.09	478.41	684.53	774.87	815.46	421.41	398.97	595.48
mml-miR-493-5p	-0.678772	1.98371	0.0453294	0.422074	2.45	3.94	5.48	2.93	0.94	0.46	9.01	3.91	0.87	1.95
mml-miR-484	0.332863	14.0884	0.0455912	0.422074	16286.5	12956.8	8696.03	12938.9	21619.2	21891.8	7727.47	11767.8	18366.9	13965
mml-miR-210-5p	0.61854	1.74864	0.047196	0.422074	3.06	2.15	1.58	3.16	4.83	2.67	1.15	2.71	3.83	0.92
mml-miR-26b-3p	-0.378442	6.37927	0.0477291	0.422074	60.69	78.69	74.48	75.11	41.37	51.78	83.11	82.96	68.75	79.94
mml-miR-1235	-0.722542	2.67949	0.0477532	0.422074	3.47	6.63	0	4.96	3.57	5.33	0	5.61	4.81	16.09
mml-miR-374a-5p	-0.417584	5.90809	0.0498755	0.422074	42.52	59.13	60.12	54.25	28.66	27.04	93.48	54.71	58.81	29.52
mml-miR-340-5p	0.423378	7.16615	0.0506937	0.422074	135.08	106.1	113.67	139.85	138.06	148.72	149.87	106.2	89.2	79.12
mml-miR-181a-5p	0.47254	7.11258	0.0510965	0.422074	138.68	93.29	70.83	92.59	212.39	178.89	81.75	94.98	86.35	110.08
mml-miR-1260b	0.361227	5.95416	0.0515129	0.422074	57.81	45.66	40.89	49.17	81.68	59.51	31.13	46.59	56.95	47.97
mml-miR-28-3p	-0.351927	7.72557	0.0539184	0.422074	155.35	200.97	192.05	168.6	109.08	151.66	217.46	192.47	160.46	233.48
mml-miR-4446-3p	0.615488	1.69373	0.0541548	0.422074	2.92	2	1.46	5.08	2.1	3.04	1.47	3.81	0.77	1.95
mml-miR-664	0.456439	3.59059	0.0551342	0.422074	11.51	8.55	9.86	6.09	17.11	12.97	6.81	6.31	14.1	6.97
mml-miR-7204-3p	0.337321	6.49862	0.0581666	0.422074	84.47	68.36	82.64	60.45	100.05	94.73	60.58	59.21	90.4	63.24
mml-miR-144	0.399122	6.59631	0.0581788	0.422074	88.82	72.93	74.48	102.06	98.06	80.66	72.21	75.85	106.47	37.2
mml-miR-363-3p	-0.471978	4.09086	0.0582012	0.422074	11.91	16.61	17.65	13.76	5.46	10.76	25.15	17.93	13.12	10.25
mml-miR-29b-3p	-0.341099	7.79881	0.0584424	0.422074	164.16	214.08	190.59	133.76	142.26	190.02	209.81	153.29	238.95	254.28
mml-miR-1240	0.428193	4.16217	0.0587233	0.422074	16.51	12.8	12.17	18.83	20.68	14.35	7.34	17.03	14.21	12.61
mml-miR-584-5p	0.408077	9.37075	0.061344	0.42484	631.23	478.27	467.35	554.76	883.27	619.53	541.62	553.87	409.36	408.22
mml-miR-671-5p	0.472831	4.70454	0.061571	0.42484	26.15	17.72	12.9	11.5	48.29	31.91	14.67	11.22	31.15	13.84
mml-miR-187-3p	0.380647	9.52649	0.0653961	0.442385	683.51	581.89	1135.76	493.52	488.62	616.13	1086.69	509.48	229.98	501.39
mml-let-7f-5p	-0.400153	11.9921	0.0674619	0.444453	2851.08	3926.16	3132.72	4607.34	2258.53	1405.72	5878.13	5407.2	1924.36	2494.96
mml-miR-154-5p	-0.385543	5.36589	0.0704218	0.444453	32.37	39.24	73.88	17.03	18.27	20.33	72.63	21.14	33.99	29.21
mml-miR-940	0.693052	0.92905	0.0709362	0.444453	1.73	1.04	0.85	1.02	2.83	2.21	0.94	0.7	1.2	1.33
mml-miR-222-3p	0.366052	7.94098	0.0716395	0.444453	241.37	175.92	144.34	120.9	404.1	296.15	169.26	118.63	244.85	170.96
mml-miR-378d	0.493282	4.23646	0.0721431	0.444453	18.81	12.7	15.94	9.81	30.55	18.95	13.94	11.82	12.13	12.91
mml-let-7b-5p	0.477214	12.4595	0.0763197	0.445939	5677.53	3708.45	3354.71	4618.28	10824	3913.18	3178.22	4250.27	3314.65	4090.65
mml-miR-296-5p	0.296485	10.6214	0.076716	0.445939	1438.43	1203.65	1261.24	1398.45	1811.17	1282.84	1183.74	1347.69	1383.07	900.08
mml-miR-138-3p	0.485118	3.24245	0.0786298	0.445939	8.71	6.62	8.15	10.38	9.03	7.27	5.76	9.92	3.61	7.17
mml-miR-29b-2-5p	0.496538	4.00328	0.0794261	0.445939	15.48	11.16	14.12	11.84	22.26	13.7	14.88	12.32	8.42	9.02
mml-miR-96	0.692841	0.683155	0.0796825	0.445939	1.41	0.89	1.34	0.9	2.2	1.2	0.84	1	1.2	0.51
mml-miR-148b-5p	-0.40224	3.69528	0.0801397	0.445939	9.27	12.38	9.49	5.98	9.03	12.6	14.57	9.02	13.01	12.91
mml-miR-598-3p	0.499379	1.89527	0.0828737	0.453406	3.46	2.45	4.14	1.69	3.78	4.23	3.04	1.7	2.3	2.77
mml-miR-197-3p	0.292601	12.1342	0.084205	0.453406	4094.77	3400.03	2774.17	4113.59	5756.55	3734.75	2226.2	3532.59	4206.16	3635.18
mml-miR-652	0.330378	8.26116	0.0854242	0.453406	293.39	225.65	198.5	183.6	431.93	359.52	221.76	187.16	270.65	223.02
mml-miR-937	0.6605	0.906613	0.0879501	0.459739	1.63	1.09	1.22	1.58	1.89	1.84	0.73	1.8	1.09	0.72
mml-miR-122a-5p	-0.567202	5.58305	0.0893537	0.460105	36.21	38.89	5.6	113.68	11.97	13.61	10.38	81.76	49.3	14.14
mml-miR-194-5p	-0.297585	7.96224	0.0910669	0.462031	188.52	235.64	242.44	157.66	157.69	196.27	255.4	192.47	270.54	224.15
mml-miR-32-5p	-0.434395	3.54853	0.0928318	0.464159	7.99	11.56	8.88	7.44	9.76	5.89	12.37	6.41	18.15	9.33
mml-miR-196a-5p	-0.35219	7.85021	0.0966891	0.472206	175.34	214	290.88	229.39	154.86	26.21	376.34	281.74	144.72	53.19
mml-miR-33a	0.801708	1.12814	0.0971786	0.472206	1.99	1.28	0.61	1.8	4.09	1.47	1.05	0.1	3.06	0.92
mml-miR-450b-5p	-0.670614	1.05823	0.100269	0.47825	1.15	1.93	0.61	1.35	1.26	1.38	1.78	0.9	1.97	3.07
mml-miR-342-5p	0.458254	2.38239	0.101195	0.47825	4.7	3.54	3.65	5.98	2.62	6.53	1.68	5.61	3.06	3.79
mml-miR-376c-5p	-0.549283	1.29357	0.113177	0.520485	1.54	2.27	3.29	1.02	0.94	0.92	4.4	1.7	1.86	1.13
mml-miR-26a-2-3p	-0.429995	3.89883	0.114408	0.520485	10.33	14.53	12.9	12.52	9.55	6.35	13.21	12.02	23.17	9.74
mml-miR-324-3p	0.269142	7.88071	0.114856	0.520485	213.21	177.91	125.11	237.17	266.67	223.86	124.61	204.89	202.77	179.36
mml-miR-361-5p	-0.280954	11.4533	0.116166	0.520485	2134.14	2595.96	2511.53	2204.48	1398.45	2422.11	2639.02	2513.43	2421.17	2810.22
mml-miR-590-3p	-0.647086	1.38491	0.119506	0.525213	1.63	2.37	1.58	3.72	0.84	0.37	4.09	2.71	1.75	0.92
mml-miR-532-3p	0.2744	9.92504	0.121148	0.525213	880.95	733.87	719.28	1026.62	1135.46	642.43	602.09	887.61	776.41	669.37
mml-miR-1284	-0.482801	1.61942	0.121788	0.525213	1.96	2.83	2.07	2.03	1.89	1.84	2.52	2.1	3.61	3.07
mml-miR-491-5p	0.260465	7.85992	0.128745	0.54836	212.93	178.52	160.17	166.69	253.65	271.23	157.62	157.6	209.87	188.99
mml-miR-107-3p	0.367998	7.87847	0.132923	0.553426	229.23	171.51	202.52	119.88	390.35	204.18	247.44	142.37	166.26	129.96
mml-miR-98	-0.33	5.5132	0.133143	0.553426	33.07	42.6	38.46	54.25	23.31	16.28	63.41	58.21	22.74	26.03
mml-let-7g-5p	-0.299544	11.4087	0.136441	0.554424	1970.04	2586.34	2380.33	2844.84	1620.4	1034.61	4177.2	3270.19	1435.32	1462.66
mml-miR-382-3p	0.490571	1.40469	0.137599	0.554424	2.38	1.74	4.02	1.35	1.57	2.58	3.25	1.4	1.09	1.23
mml-miR-4677-3p	0.409629	2.13923	0.138243	0.554424	3.93	3.09	3.53	3.83	4.2	4.14	2.83	2.81	4.48	2.25
mml-miR-27b-3p	-0.272474	8.05202	0.139811	0.554424	199.92	248.2	263.01	208.87	171.55	156.26	322.89	243.17	175.22	251.51
mml-miR-135a-5p	-0.51562	1.36141	0.151686	0.59369	1.59	2.37	1.95	0.45	1.57	2.39	1.89	0.5	3.61	3.48
mml-miR-30c-1-3p	0.349401	5.17927	0.15539	0.59369	34.13	26.18	24.46	28.87	53.75	29.43	26.72	29.06	24.05	24.91
mml-miR-1296-5p	-0.254973	7.4103	0.156078	0.59369	128.76	151.68	123.65	206.5	77.38	107.52	138.23	211.81	114.23	142.46
mml-let-7a-5p	-0.291275	14.2027	0.156597	0.59369	13718.4	17794.6	15958.7	18146.5	12580.8	8187.36	24617.9	24297.5	9848.74	12414.3
mml-miR-127-3p	0.400886	2.03034	0.160681	0.602555	3.71	2.95	7.18	2.37	3.36	1.93	6.29	1.8	2.19	1.54
mml-miR-369-5p	-0.33327	3.64241	0.165141	0.612619	9.41	12.03	21.54	5.53	4.41	6.16	27.14	5.81	7.87	7.28
mml-miR-126	-0.257752	9.10679	0.167017	0.61299	407.38	529.52	700.54	553.86	256.28	118.83	1119.39	587.43	247.8	163.47
mml-miR-9-5p	-0.503372	2.01693	0.170787	0.620228	2.64	3.87	4.02	2.93	1.57	2.02	4.09	2.1	5.9	3.38
mml-miR-3140	0.420985	1.79897	0.180728	0.636681	3.06	2.41	2.68	2.59	4.3	2.67	2.93	2.5	3.06	1.13
mml-miR-361-3p	0.219369	11.9888	0.183625	0.636681	3612.16	3175.09	2628.73	3578.91	5259.43	2981.59	2172.44	3534.8	4331.32	2661.81
mml-miR-103-3p	0.324773	12.3632	0.183721	0.636681	4956.51	4018.27	4785.85	3094.87	7712.71	4232.6	6353.3	3543.11	3306.67	2869.97
mml-miR-191-3p	0.260719	6.70394	0.184	0.636681	93.6	80.52	110.75	108.61	88.93	66.13	99.04	96.29	55.64	71.13
mml-miR-1226	0.24629	8.32357	0.185189	0.636681	281.03	247.82	199.6	360.89	316.86	246.76	135.93	296.47	267.91	290.97
mml-miR-30d-3p	-0.337088	3.21094	0.186391	0.636681	6.8	8.6	8.88	4.06	8.92	5.33	12.05	6.91	7.65	7.79
mml-miR-30b-3p	0.575964	0.917175	0.192479	0.647875	1.65	1.11	1.58	1.02	2.73	1.29	1.15	1.7	0.66	0.92
mml-miR-331-5p	0.300716	5.33298	0.193423	0.647875	37.38	29.87	24.95	31.35	57.43	35.78	27.56	25.85	30.28	35.77
mml-let-7e-5p	-0.303072	4.34348	0.200422	0.657569	14.56	19.17	18.99	16.69	12.07	10.48	26.41	25.75	10.27	14.25
mml-miR-7172-5p	-0.374514	2.10299	0.20192	0.657569	3.04	3.76	1.34	1.58	3.25	5.98	2.72	2.3	4.7	5.33
mml-miR-106b-3p	0.242605	11.5105	0.203308	0.657569	2678.74	2226.32	1894.6	2048.62	3924.7	2847.03	1971.12	2195.72	2331.43	2407.02
mml-miR-381-3p	-0.268374	5.08027	0.207131	0.657569	26.78	32.41	63.77	12.52	15.01	15.82	72.52	12.92	26.78	17.42
mml-miR-550-5p	-0.509888	0.96712	0.210505	0.657569	1.16	1.68	0.61	0.79	1.68	1.56	1.47	2.4	1.42	1.43
mml-miR-505-3p	-0.276775	6.20895	0.210518	0.657569	54.97	69.38	76.8	54.92	37.38	50.77	69.59	61.42	43.4	103.11
mml-miR-34a-5p	-0.313122	6.04746	0.21111	0.657569	45.63	65.97	50.14	49.96	30.34	52.06	113.08	65.73	21.32	63.75
mml-miR-628-5p	-0.420654	1.66116	0.211566	0.657569	2.06	2.86	3.04	2.48	1.05	1.66	3.56	3.11	0.87	3.89
mml-miR-329-3p	0.318475	3.14608	0.214292	0.660097	7.93	7.08	16.92	4.51	4.3	5.98	17.19	4.31	2.4	4.41
mml-miR-1185-3p	-0.492417	0.794457	0.217388	0.661254	1.07	1.52	2.56	0.56	0.42	0.74	3.35	1	1.09	0.61
mml-miR-17-5p	0.216898	7.90186	0.225657	0.661254	211.61	195.19	320.7	187.78	188.14	149.82	323.31	211.01	137.18	109.26
mml-miR-19a-3p	0.236007	7.06157	0.226803	0.661254	118.67	107.37	115.13	97.1	150.13	112.3	118.22	101.09	150.74	59.45
mml-miR-339-3p	0.203288	9.83211	0.227213	0.661254	836.47	721.59	675.23	408.93	1191.42	1070.29	715.48	407.58	1019.73	743.58
mml-miR-145-5p	-0.516448	2.17362	0.230601	0.661254	2.7	4.65	4.5	1.8	1.99	2.48	2.83	2.91	10.71	2.15
mml-miR-128a-3p	-0.198543	12.1096	0.231268	0.661254	3462.03	4045.15	4353.92	2858.6	3153.77	3481.83	4382.5	3339.72	4045.92	4412.47
mml-miR-320a	0.22356	11.6952	0.23939	0.661254	2927.96	2594.69	1614.56	2560.75	3112.61	4423.91	1489.66	2932.64	1894.52	4061.95
mml-miR-188-5p	0.356227	1.81901	0.239562	0.661254	3.07	2.47	2.19	2.14	3.88	4.05	1.99	1.8	3.94	2.15
mml-miR-106b-5p	0.231266	5.77104	0.239722	0.661254	48.75	44.17	66.33	37.78	45.36	45.53	72.1	39.08	36.51	29.01
mml-miR-190a-5p	0.292628	5.25061	0.243336	0.661254	36.02	30.25	44.18	4.51	75.8	19.59	60.68	3.91	41.86	14.55
mml-miR-371-5p	0.45484	1.26009	0.249429	0.661254	2.04	1.73	4.62	0.34	1.36	1.84	4.93	0.2	0.66	1.13
mml-miR-1306-5p	0.219542	8.22945	0.249592	0.661254	262.34	228.34	174.04	405.78	270.98	198.57	156.15	336.35	182.65	238.19
mml-miR-942-5p	-0.202359	11.3526	0.250371	0.661254	1989.02	2412.05	1686.48	1831.3	2072.38	2365.92	1600.12	1997.14	2988.58	3062.35
mml-miR-18a-3p	0.186885	9.67164	0.252797	0.661254	718.23	657.83	415.26	514.04	920.33	1023.29	354.13	449.56	992.73	834.9
mml-miR-376a-1-5p	-0.462006	0.730747	0.25346	0.661254	1.02	1.42	1.95	0.68	0.52	0.92	2.31	0.8	1.64	0.92
mml-miR-342-3p	0.213911	10.1188	0.255962	0.661254	1003.49	851.1	1093.53	1219.59	466.36	1234.46	886.42	1165.54	617.37	735.07
mml-miR-532-5p	0.233183	7.14104	0.256486	0.661254	128.13	110.66	116.35	98.12	187.41	110.64	146.51	99.99	114.77	81.38
mml-miR-409-5p	0.275412	3.5467	0.25713	0.661254	10.53	9.52	21.54	4.29	7.45	8.83	22.53	4.01	5.68	5.84
mml-miR-128b-3p	-0.190981	11.889	0.257998	0.661254	2980.24	3468.73	3714.11	2342.07	2788.93	3075.86	3648.26	2732.15	3583.44	3911.08
mml-miR-377-3p	-0.385577	1.35922	0.260459	0.661254	1.72	2.26	2.31	0.45	1.89	2.21	3.35	1	2.73	1.95
mml-miR-423-5p	0.202581	12.2535	0.262674	0.661254	4247.8	3821.32	2675.96	5012.21	4418.99	4884.05	2758.18	5448.28	2865.5	4213.33
mml-miR-204-5p	0.232776	5.0994	0.26356	0.661254	32.24	27.3	59.03	9.36	43.36	17.2	39.93	9.82	45.91	13.53
mml-miR-101-3p	0.224001	8.91337	0.263632	0.661254	421.41	390.32	420.74	465.21	560.75	238.95	590.77	415.3	393.29	161.94
mml-miR-151-3p	-0.203308	10.5024	0.263692	0.661254	1126.01	1297.63	1307.49	1434.32	1027.11	735.14	1209.1	1522.93	1367.99	1090.51
mml-miR-339-5p	0.18597	14.6604	0.26541	0.661254	22825.7	21100.3	20387.3	17310.2	31573.6	22031.8	17587.9	14026.7	32844.4	19942.1
mml-miR-491-3p	0.255018	4.10665	0.266597	0.661254	15.38	13.49	17.77	12.18	15.85	15.73	12.47	9.72	19.57	12.2
mml-miR-192-3p	-0.350281	1.64165	0.270138	0.661254	2.09	2.79	2.31	1.35	2.41	2.3	4.3	2.3	2.4	2.15
mml-miR-486-3p	0.490148	1.42244	0.273014	0.661254	2.42	1.68	0.85	0.56	4.41	3.86	1.05	1	3.94	0.72
mml-miR-320b	0.221996	5.50043	0.276456	0.661254	40.13	35.07	19.72	31.92	45.04	63.83	18.65	33.26	29.51	58.83
mml-miR-92b-5p	0.343405	1.52801	0.276596	0.661254	2.47	1.96	1.58	1.58	3.67	3.04	1.26	1.5	2.4	2.66
mml-miR-6505-5p	0.459357	0.885946	0.276812	0.661254	1.55	1.16	2.19	1.13	1.68	1.2	0.84	1.9	0.77	1.13
mml-miR-143-3p	-0.372654	1.68491	0.277916	0.661254	2.08	2.87	1.34	3.38	1.47	2.12	1.36	4.11	4.26	1.74
mml-miR-29a-3p	-0.186868	7.54489	0.278332	0.661254	147.06	168.48	181.34	140.97	70.87	195.08	218.83	165.52	91.16	198.42
mml-miR-30a-3p	-0.237078	4.50902	0.279835	0.661254	17.43	20.98	29.7	18.27	9.24	12.51	36.05	19.64	10.71	17.53
mml-miR-27a-3p	-0.203557	6.42748	0.282127	0.661775	66.21	79.84	73.39	52.67	65.3	73.49	108.37	61.62	59.79	89.58
mml-miR-628-3p	-0.250208	3.09955	0.287224	0.661775	6.31	7.77	7.55	6.77	4.93	5.98	10.38	8.32	6.23	6.15
mml-miR-22	0.217407	10.4474	0.28765	0.661775	1273.45	1128.45	1513.3	669.11	1481.5	1429.91	1686.05	830.4	1278.35	718.98
mml-miR-29c-3p	0.198531	8.51814	0.289249	0.661775	324.66	296.29	327.75	290.63	390.56	289.72	424.45	252.99	275.67	232.04
mml-miR-1304	0.217894	5.67252	0.290627	0.661775	44.85	40.41	54.77	46.58	50.18	27.87	51.25	54.61	31.7	24.09
mml-miR-21-3p	0.420699	1.1391	0.291565	0.661775	1.84	1.47	1.58	1.58	1.89	2.3	2.1	1.4	1.75	0.61
mml-miR-223	-0.195717	15.2351	0.298829	0.67383	29525.6	35792.3	37082.3	27006.6	24980.4	29033.2	46422.8	32401	21200	43145.3
mml-miR-186-5p	-0.170635	11.7907	0.304748	0.682714	2804.72	3237.88	2991.05	1811.56	2860.85	3555.41	2990.31	2124.39	3966.12	3870.7
mml-miR-187-5p	0.189864	5.98045	0.314861	0.68636	56.6	50.69	107.1	53.34	15.01	50.95	87.72	51.9	11.91	51.25
mml-miR-23a-3p	-0.164174	11.4843	0.315202	0.68636	2288.05	2593.43	3124.44	1863.44	1632.58	2531.74	3408.06	2214.26	2057.72	2693.69
mml-miR-93-3p	0.17536	11.0509	0.317001	0.68636	1867.74	1741.99	1568.67	1220.94	2489.19	2192.18	1382.97	1212.43	2931.74	1440.83
mml-miR-375	0.519591	1.48193	0.317234	0.68636	2.12	2.09	1.95	1.92	1.68	2.94	1.78	5.41	0.66	0.51
mml-miR-340-3p	-0.19992	7.02497	0.31927	0.68636	101.11	118.18	125.24	111.31	81.05	86.82	111.19	110.91	145.16	105.46
mml-miR-4766-3p	-0.207697	4.84603	0.320069	0.68636	22.29	26.27	22.03	13.2	21.73	32.19	20.86	16.73	33.99	33.51
mml-miR-7194-3p	0.287219	2.41481	0.324251	0.68636	4.65	3.91	4.99	4.96	5.35	3.31	2.72	3.51	4.59	4.82
mml-let-7d	-0.177372	10.9875	0.324265	0.68636	1545.58	1848.81	1758.17	1859.27	1263.54	1301.33	2234.17	2452.32	1087.83	1620.91
mml-miR-6529-5p	0.178979	8.18365	0.32428	0.68636	252.36	234.46	209.21	208.98	266.57	324.67	140.12	245.97	224.19	327.56
mml-miR-21-5p	-0.168049	8.63061	0.32694	0.687771	310.2	365.29	347.47	261.87	324.63	306.82	503.26	265.21	372.41	320.29
mml-miR-335-5p	-0.213929	4.26525	0.333229	0.694327	15	16.83	10.1	11.28	8.19	30.44	11	15.53	11.59	29.21
mml-miR-15a-3p	0.289757	2.30596	0.334082	0.694327	4.41	3.57	2.43	1.8	7.87	5.52	3.46	1.9	6.34	2.56
mml-miR-6790-3p	0.204019	4.51172	0.338707	0.699725	20.07	17.86	14.6	18.38	21.52	25.75	13.52	14.83	22.08	21.01
mml-miR-299-3p	0.298672	1.96086	0.341971	0.701623	3.31	3.08	7.79	2.14	1.57	1.75	8.49	1.4	1.42	1.02
mml-miR-494-3p	0.185894	5.57466	0.347942	0.701623	44.59	38.64	102.72	18.16	28.98	28.51	85.83	22.64	24.16	21.93
mml-miR-20a-5p	0.18133	6.18656	0.348733	0.701623	63.3	60.96	84.46	51.09	70.66	47	98.62	48.99	67.11	29.11
mml-miR-3122	0.210455	3.67583	0.34933	0.701623	11.23	9.92	11.68	9.7	11.02	12.51	9.64	10.32	10.49	9.22
mml-miR-330-5p	-0.215924	3.4154	0.349795	0.701623	8.04	9.61	6.57	5.41	9.24	10.94	7.13	6.51	13.01	11.79
mml-miR-7180-5p	0.166093	7.02926	0.354864	0.704494	114.17	106.46	79.11	78.83	120.11	178.61	64.35	65.93	144.61	150.97
mml-miR-376b-5p	-0.401552	1.0222	0.35531	0.704494	1.4	1.7	3.29	0.11	0.73	1.47	3.46	0.9	1.64	0.82
mml-miR-370-3p	0.235766	4.71015	0.35832	0.705164	22.59	21.68	38.95	22.56	17.53	11.31	44.12	23.14	8.2	11.27
mml-miR-191-5p	0.157629	16.691	0.359736	0.705164	91997.8	85314.5	103089	90807.5	81950.2	92144.5	78785.5	109184	72208.1	81080.7
mml-let-7i-3p	0.205762	4.83126	0.365687	0.709549	25.78	21.78	17.28	19.96	43.15	22.72	21.48	19.44	27.44	18.76
mml-miR-16-5p	-0.161007	16.2956	0.36657	0.709549	62549.2	73768.5	100594	73524	41935.5	34143.3	129075	83443.5	37911.8	44644.1
mml-miR-301a-5p	0.375212	0.772106	0.368143	0.709549	1.38	1.09	1.46	1.69	1.36	1.01	1.26	0.6	0.98	1.54
mml-miR-106a-5p	0.191266	5.42148	0.372707	0.714356	36.86	35.46	51.97	34.96	29.5	30.99	57.54	42.48	23.17	18.65
mml-miR-26a-1-3p	-0.228832	2.65203	0.383207	0.730422	4.81	5.54	8.15	3.61	3.15	4.32	7.02	4.41	5.79	4.92
mml-miR-7186-3p	-0.17192	6.17496	0.390608	0.739727	57.47	66.56	86.41	33.38	59.42	50.68	72.52	37.97	99.58	56.17
mml-miR-148a-5p	0.225998	3.45216	0.394067	0.739727	9.93	8.38	11.32	5.53	6.4	16.46	10.06	4.21	9.73	9.53
mml-miR-149-5p	-0.314275	1.12794	0.394521	0.739727	1.42	1.8	1.22	2.82	0.52	1.1	1.15	3.61	1.09	1.33
mml-miR-409-3p	0.144835	9.67357	0.397145	0.740623	737.06	676.48	1495.89	477.17	552.56	422.62	1336.54	552.96	424.88	391.52
mml-let-7a-3p	-0.169803	6.99896	0.400075	0.742074	100.09	117.58	123.78	73.19	96.17	107.24	99.14	81.26	168.88	121.04
mml-miR-1255a-3p	-0.203119	3.13847	0.40237	0.742341	6.6	7.99	6.69	5.08	8.08	6.53	8.28	4.51	11.37	7.79
mml-miR-28-5p	-0.267393	1.43075	0.404654	0.742584	1.88	2.24	1.58	1.13	1.57	3.22	2.1	1.9	2.08	2.87
mml-miR-487b-5p	-0.250526	1.84313	0.416022	0.759406	2.66	3.09	5.36	2.71	1.36	1.2	5.66	2.81	1.75	2.15
mml-miR-486-5p	0.13655	17.6065	0.431165	0.779782	171430	161004	130147	204754	186176	164642	112202	160611	200992	170210
mml-miR-199a-3p	-0.22727	4.54669	0.431705	0.779782	18.07	19.92	17.65	40.94	7.98	5.7	24.1	31.06	19.89	4.61
mml-miR-425	0.134696	14.5288	0.438509	0.782421	20730.8	19549	17651.5	12294.7	24454.2	28523	14789.4	12333.6	30214.1	20858.7
mml-miR-183-5p	-0.221772	2.20241	0.44196	0.782421	3.38	3.92	3.41	5.86	2.52	1.75	5.14	4.91	2.95	2.66
mml-miR-500b-3p	-0.291306	0.918908	0.445234	0.782421	1.23	1.5	0.61	0.79	1.68	1.84	0.94	1.7	1.42	1.95
mml-miR-30e-3p	-0.130664	8.51472	0.447817	0.782421	291.25	328.85	332.38	244.5	312.76	275.37	322.37	247.78	381.7	363.54
mml-miR-502-3p	0.171402	4.96826	0.45044	0.782421	28.06	24.77	23.37	17.48	32.65	38.72	29.24	19.94	27.76	22.14
mml-miR-365-3p	-0.20733	3.73141	0.456265	0.782421	10.94	11.25	10.95	5.86	5.04	21.89	13.73	9.72	8.64	12.91
mml-miR-181a-3p	0.159556	4.22774	0.456681	0.782421	16.51	14.97	17.53	10.49	16.06	21.98	15.62	10.12	16.83	17.32
mml-miR-542-5p	-0.282484	1.94568	0.45686	0.782421	2.68	3.34	1.22	2.82	3.57	3.13	3.88	2.91	1.86	4.71
mml-let-7f-3p	0.149267	5.56121	0.45753	0.782421	41.68	38.38	50.02	27.63	40.53	48.56	35	27.85	50.17	40.48
mml-miR-454-3p	-0.134023	8.14755	0.457998	0.782421	222.27	256.56	318.38	252.51	199.16	119.01	409.99	302.68	166.91	146.67
mml-miR-92b-3p	0.135184	8.00949	0.458113	0.782421	220.52	218.05	206.54	145.48	294.07	236	162.23	112.92	355.58	241.47
mml-miR-23b-3p	0.120752	9.99633	0.461398	0.784149	897.98	837.48	1084.16	690.88	795.71	1021.18	1002.95	784.41	788.66	773.92
mml-miR-6529-3p	0.146634	5.15347	0.467397	0.790451	30.97	28.86	30.55	22.56	37.59	33.2	22.22	25.55	39.9	27.78
mml-miR-337-5p	0.227143	2.08732	0.474853	0.796819	3.52	3.47	7.42	1.8	2.73	2.12	9.01	1.9	1.2	1.74
mml-miR-20a-3p	0.277184	2.63242	0.475782	0.796819	5.55	4.61	3.89	2.48	11.02	4.78	8.49	3.31	4.48	2.15
mml-miR-424-5p	0.145391	5.83289	0.482062	0.803437	51.88	44.88	41.14	23.68	73.18	69.53	45.59	30.56	51.92	51.45
mml-miR-18b	0.171424	4.21241	0.485403	0.805116	16.02	15.09	15.7	12.63	19.95	15.82	21.59	12.72	16.94	9.12
mml-miR-99a-5p	-0.146344	4.75553	0.4927	0.805137	21.05	24.14	16.55	15.68	19.95	32.01	15.09	17.73	29.29	34.44
mml-miR-181c-3p	0.209367	1.94294	0.495281	0.805137	3.19	2.94	3.16	2.37	3.25	3.95	3.98	1.1	3.5	3.18
mml-miR-221-5p	0.17777	3.00116	0.499777	0.805137	6.99	6.19	8.4	4.06	7.98	7.54	7.13	6.31	5.47	5.84
mml-miR-431	0.162417	4.39122	0.499999	0.805137	18.16	17.96	34.44	9.36	15.22	13.61	40.56	10.52	9.29	11.48
mml-miR-150-3p	0.205527	1.88497	0.501999	0.805137	3.04	2.72	2.31	3.83	3.36	2.67	2.93	3.51	1.86	2.56
mml-miR-542-3p	-0.307366	0.740266	0.506155	0.805137	1.05	1.32	0.49	0.68	1.57	1.47	1.78	1.6	0.98	0.92
mml-miR-7205-3p	0.130618	5.51919	0.506715	0.805137	40.09	36.63	45.15	45.22	60.05	9.93	38.67	40.18	56.62	11.07
mml-miR-654-3p	-0.11103	8.11968	0.513052	0.805137	236.93	253.2	584.19	112.89	135.12	115.52	590.35	114.62	183.2	124.63
mml-miR-660-5p	0.13049	5.50458	0.513253	0.805137	39.78	36.88	39.8	28.65	50.5	40.19	43.6	29.36	36.73	37.82
mml-miR-576-5p	0.133914	6.02907	0.513398	0.805137	55.23	54.16	46	55.37	58.27	61.25	35.63	50.2	86.03	44.79
mml-miR-30d-5p	-0.106604	13.2216	0.513938	0.805137	7701.98	8498.49	8629.95	6704.23	7144.19	8329.55	9812.19	7282.91	8348.71	8550.17
mml-miR-432-5p	0.189838	4.79306	0.517531	0.805137	24.42	22.01	36.76	25.6	24.67	10.67	34.79	25.95	10.27	17.01
mml-miR-15b-5p	-0.108798	13.2882	0.517628	0.805137	7919.69	8852	10765	9386.66	4781.83	6745.22	11156.6	11652.6	4778.17	7820.63
mml-miR-200c-3p	-0.160755	3.01722	0.519753	0.805137	6.08	7.33	9.86	6.88	4.09	3.49	14.15	7.21	4.48	3.48
mml-miR-10a-5p	-0.123363	6.1135	0.525176	0.805137	56.29	61.25	80.69	51.43	34.54	58.49	81.96	52.9	56.73	53.4
mml-miR-6827-3p	0.132694	4.43803	0.526883	0.805137	18.89	17.7	24.22	13.53	22.36	15.45	20.54	13.33	23.5	13.43
mml-miR-4766-5p	0.201672	2.20245	0.527207	0.805137	3.85	3.53	4.02	2.71	4.83	3.86	5.55	3.51	2.08	2.97
mml-miR-379-5p	-0.173542	3.04651	0.527423	0.805137	6.07	8.03	15.58	4.29	2.83	1.56	22.95	5.21	2.51	1.43
mml-miR-605	-0.222251	1.25539	0.532621	0.80949	1.65	1.96	1.58	2.37	1.26	1.38	1.57	2	2.51	1.74
mml-miR-7	0.121704	10.4282	0.536633	0.810747	1181.11	1155.3	1718.98	1131.28	1095.98	778.18	1868.93	1261.33	662.51	828.44
mml-miR-1255a-5p	-0.241205	0.954549	0.542653	0.810747	1.27	1.55	1.1	1.69	0.63	1.66	0.73	1.4	1.31	2.77
mml-miR-889-3p	-0.212131	1.51382	0.542666	0.810747	2.06	2.51	5.11	1.58	0.52	1.01	6.5	1.6	1.2	0.72
mml-miR-10b-5p	-0.222991	2.65774	0.543987	0.810747	4.52	5.85	5.11	2.82	3.15	6.99	3.88	3.21	11.7	4.61
mml-miR-374a-3p	0.240542	1.3909	0.545198	0.810747	2.27	1.73	0.97	1.24	5.56	1.29	1.47	2	2.62	0.82
mml-miR-25	-0.104457	15.8838	0.547971	0.811373	48537.6	53532.8	57427.3	46154.8	45865.9	44702.3	57955.2	49912	45945.6	60318.6
mml-miR-134-5p	0.156261	4.86417	0.552586	0.813453	25.89	23.93	51.73	18.16	21.63	12.05	48.1	20.84	10.38	16.4
mml-miR-942-3p	0.158307	2.9425	0.559715	0.813453	6.26	5.94	1.58	7.22	6.3	9.93	1.36	9.72	4.26	8.4
mml-let-7b-3p	0.109944	6.22161	0.560177	0.813453	63.54	61.98	58.91	50.98	74.02	70.27	41.29	49.09	80.56	76.97
mml-miR-185-5p	0.101611	11.5978	0.561001	0.813453	2650.85	2532.33	1978.21	2465.9	2762.37	3396.94	2014.4	2807.3	2088.65	3218.96
mml-miR-671-3p	0.0987827	8.12252	0.561164	0.813453	237.31	232.07	191.08	213.49	296.17	248.51	174.6	176.54	330.66	246.49
mml-miR-503-5p	-0.115182	6.6892	0.564689	0.814999	82.21	91.34	69.01	63.49	93.86	102.46	87.3	83.06	70.18	124.83
mml-miR-20b-5p	-0.133522	3.98096	0.566956	0.814999	11.98	14.55	21.18	13.76	6.82	6.16	28.93	16.73	7.43	5.12
mml-miR-499-5p	0.211434	1.19696	0.572494	0.818572	1.82	1.62	0.97	2.26	2.94	1.1	1.78	1.8	2.3	0.61
mml-miR-424-3p	0.139016	4.81475	0.579151	0.818572	24.83	22.06	14.36	15.56	36.75	32.65	16.35	19.14	19.13	33.62
mml-miR-99b-5p	0.101879	5.92897	0.582224	0.818572	53.65	50.08	69.86	32.93	53.86	57.94	61.52	40.08	49.52	49.2
mml-miR-139-5p	-0.239213	0.822396	0.583197	0.818572	1.21	1.38	1.95	1.35	0.42	1.1	1.05	1.2	1.42	1.84
mml-miR-550-3p	-0.137264	2.46013	0.583533	0.818572	4.17	4.67	3.29	4.17	3.78	5.43	4.09	4.31	5.25	5.02
mml-miR-7180-3p	0.136636	4.46676	0.583677	0.818572	19.22	17.32	10.59	17.59	24.15	24.56	15.2	17.63	14.32	22.14
mml-miR-7195-3p	0.215427	0.908893	0.586954	0.819835	1.48	1.28	0.49	0.45	3.78	1.2	0.52	0.5	3.17	0.92
mml-miR-636	0.109279	4.79017	0.602047	0.837525	23.27	22.57	14.24	22.44	27.61	28.79	12.16	19.74	27.22	31.16
mml-miR-543-3p	-0.123367	2.89461	0.609648	0.842521	5.9	6.51	10.83	3.5	3.57	5.7	11.84	4.51	3.94	5.74
mml-miR-3200-5p	0.208319	1.93343	0.610523	0.842521	3.22	2.79	3.53	0.9	3.67	4.78	1.47	3.01	1.86	4.82
mml-miR-582-3p	-0.134928	3.00178	0.614278	0.84378	6.5	6.81	13.02	5.41	0.21	7.36	12.68	6.41	0.66	7.48
mml-miR-382-5p	0.134787	5.11928	0.618289	0.84378	29.96	29.98	62.56	18.27	26.14	12.88	69.27	25.35	11.37	13.94
mml-miR-146b-5p	-0.154238	2.4623	0.623433	0.84378	4.41	4.53	5.6	2.93	1.36	7.73	4.4	3.01	4.37	6.35
mml-miR-100-5p	-0.280659	1.19525	0.624901	0.84378	1.72	1.68	0.97	0.9	0.21	4.78	0.52	1.4	2.62	2.15
mml-miR-130b-5p	0.0847393	6.19967	0.626568	0.84378	62.78	60.72	51.48	50.75	67.4	81.49	44.75	53	73.67	71.44
mml-miR-7165-3p	0.126144	2.56476	0.629957	0.84378	4.99	4.56	6.09	4.62	2.73	6.53	3.88	4.51	3.83	6.05
mml-miR-196b-5p	-0.123562	3.00385	0.636214	0.84378	6.13	7.12	9.13	6.77	5.67	2.94	13	7.31	4.48	3.69
mml-miR-140-3p	0.0797371	13.3285	0.6372	0.84378	8921.99	8543.16	10211	6692.39	8469.68	10314.9	8794.04	7854.61	9377.95	8146.04
mml-miR-627-5p	-0.0930699	6.09293	0.637999	0.84378	53.98	60.15	66.45	55.37	43.78	50.31	63.82	74.14	36.84	65.8
mml-miR-148b-3p	-0.0750024	9.24428	0.639191	0.84378	496.26	528.62	451.9	370.59	425.84	736.7	468.57	453.97	454.83	737.12
mml-miR-4677-5p	-0.181033	1.05798	0.64094	0.84378	1.44	1.72	2.19	0.68	1.68	1.2	1.57	1	3.28	1.02
mml-miR-376a-3p	-0.101428	3.98709	0.644074	0.84378	12.91	14.09	23.25	7.89	9.45	11.04	25.05	8.72	10.93	11.68
mml-miR-411-5p	-0.188819	0.820484	0.64556	0.84378	1.23	1.44	3.29	0.45	0.73	0.46	3.77	0.5	1.09	0.41
mml-miR-335-3p	-0.117952	4.81304	0.645675	0.84378	23.66	23.95	14.97	8.23	13.96	57.48	15.2	7.82	29.73	43.05
mml-miR-194-3p	0.189517	0.810476	0.649654	0.845776	1.32	1.22	1.46	1.02	1.78	1.01	0.42	1.7	1.75	1.02
mml-miR-6505-3p	-0.118867	2.31358	0.656054	0.850897	3.75	4.25	3.53	3.61	3.99	3.86	3.77	2.91	5.9	4.41
mml-miR-19b	0.0825168	12.3542	0.661005	0.854108	4546.43	4354.03	4349.66	3125.2	4572.48	6138.38	3975.24	3783.78	5891.03	3766.06
mml-miR-505-5p	-0.10985	2.63284	0.664749	0.85574	4.78	5.31	5.72	3.95	4.3	5.15	5.45	4.01	4.59	7.17
mml-miR-3200-3p	-0.0801672	7.76212	0.675512	0.866363	171.27	191.45	149.82	172.21	167.25	195.81	151.54	190.17	144.07	280.01
mml-miR-24-3p	0.0776781	9.76078	0.680704	0.869468	744.01	730.45	765.53	560.85	807.47	842.2	1013.23	643.34	586.11	679.11
mml-miR-543-5p	0.145624	1.10461	0.682973	0.869468	1.68	1.58	2.8	1.47	1.15	1.29	2.93	1.4	0.87	1.13
mml-miR-551a	-0.163471	1.02925	0.687326	0.871304	1.4	1.6	0.24	2.37	2.62	0.37	0.94	2.3	2.95	0.2
mml-miR-874-3p	-0.148646	0.777961	0.692946	0.871304	1.14	1.32	0.97	1.8	1.15	0.64	1.36	2	1.31	0.61
mml-miR-376c-3p	0.114154	2.85856	0.693109	0.871304	6.25	5.9	10.1	1.69	6.4	6.81	11.84	3.11	3.72	4.92
mml-miR-503-3p	-0.0798559	5.54805	0.694517	0.871304	37.62	40.85	32.86	31.8	44.41	41.39	38.99	34.27	37.27	52.89
mml-miR-140-5p	-0.0796126	6.06433	0.699386	0.874233	54.19	59.46	51.6	43.08	78.11	43.96	81.22	38.47	70.5	47.66
mml-miR-933	0.143396	1.40364	0.70503	0.878106	2.07	1.97	0.49	0.56	3.46	3.77	0.94	0.1	4.15	2.66
mml-miR-211	0.100689	2.72923	0.710705	0.878607	5.5	5.31	2.8	3.38	8.92	6.9	3.88	3.01	10.06	4.3
mml-miR-500a-3p	0.0864958	4.83831	0.712215	0.878607	24.31	23.69	24.46	19.96	29.08	23.73	31.65	22.14	17.82	23.16
mml-miR-92a-3p	0.0626074	17.0138	0.713072	0.878607	111005	110236	90485.8	119017	112228	122288	79153.1	106660	120975	134155
mml-miR-205	0.114828	1.49723	0.718877	0.880491	2.23	2.12	1.95	1.92	2.2	2.85	2.41	1.9	2.4	1.74
mml-miR-485-3p	0.0613008	8.47203	0.719706	0.880491	311.53	293.16	540.5	296.16	261.95	147.52	458.19	292.36	248.78	173.31
mml-miR-324-5p	-0.0572963	7.86051	0.732142	0.888259	191.27	201.48	142.88	134.66	241.05	246.49	152.8	158.81	259.39	234.91
mml-miR-372-3p	0.113564	1.91682	0.733644	0.888259	3.1	3.06	6.21	0.45	1.15	4.6	7.65	0.3	1.31	2.97
mml-miR-15b-3p	0.0662134	11.7013	0.736154	0.888259	2939.39	2728.46	2772.22	1745.92	4772.8	2466.63	3118.28	1959.27	3045.86	2790.44
mml-miR-500a-5p	-0.0754391	3.97835	0.746635	0.888259	12.78	13.67	11.68	7.67	14.28	17.47	13.62	9.32	19.02	12.71
mml-miR-29c-5p	-0.0610172	6.23665	0.746964	0.888259	60.7	66.7	54.04	51.65	64.46	72.66	56.7	44.08	93.35	72.67
mml-miR-199a-5p	-0.0885727	3.50189	0.747753	0.888259	8.54	10.26	7.18	7.78	10.81	8.37	8.7	8.62	19.02	4.71
mml-miR-362-5p	-0.0685144	4.66892	0.748446	0.888259	20.84	21.95	15.46	13.2	25.83	28.88	20.02	14.63	29.08	24.09
mml-miR-7186-5p	0.0604619	5.56436	0.750163	0.888259	40.14	39.9	44.06	32.93	45.67	37.89	49.99	32.56	45.47	31.57
mml-miR-1271-5p	0.0553437	7.4206	0.750792	0.888259	147.06	147.72	200.69	79.62	204.73	103.19	170.93	85.26	245.51	89.17
mml-miR-7172-3p	0.120204	0.716609	0.75185	0.888259	1.22	1.14	1.7	0.79	0.84	1.56	1.57	1.1	0.66	1.23
mml-miR-199a	0.0865695	3.74956	0.754683	0.888259	10.84	11.57	10.83	11.39	11.65	9.47	9.96	7.82	21.75	6.76
mml-miR-130a-3p	0.0724067	3.39903	0.75917	0.888259	8.82	8.61	13.02	8.57	5.88	7.82	11.42	10.02	4.81	8.2
mml-miR-1180-3p	0.056915	8.85428	0.759526	0.888259	386.5	376.71	217.37	489.68	458.17	380.77	242.3	482.03	331.75	450.76
mml-miR-185-3p	-0.0722209	4.09886	0.763724	0.888345	13.55	14.35	7.18	19.06	12.49	15.45	10.17	17.03	10.82	19.37
mml-let-7c-5p	0.0683736	6.62459	0.767859	0.888345	82.69	81.33	68.89	97.22	101.73	62.91	96.31	104.5	55.42	69.08
mml-miR-132-3p	-0.0809545	2.84538	0.76927	0.888345	5.71	6.02	5.48	4.74	3.99	8.65	6.81	5.91	6.34	5.02
mml-let-7g-3p	-0.0899234	2.06258	0.77168	0.888345	3.24	3.45	2.43	1.35	4.93	4.23	3.98	2.2	5.14	2.46
mml-miR-373	0.0912396	1.77698	0.772474	0.888345	2.8	2.67	4.87	0.56	1.15	4.6	4.93	0.8	0.66	4.3
mml-miR-5697-3p	-0.0960822	1.20923	0.78558	0.900416	1.7	1.83	2.68	1.58	1.36	1.2	2.31	1.3	2.08	1.64
mml-miR-30e-5p	-0.0442935	10.4371	0.78948	0.901889	1140.76	1227.51	1149.03	787.31	1425.54	1201.17	1383.49	785.51	1689.57	1051.46
mml-miR-93-5p	0.0493655	14.7473	0.798388	0.909055	22563.6	24322.6	36534.5	22726.7	18205.2	12788.1	46774.2	25707.9	12264.9	12543.5
mml-miR-330-3p	-0.0785539	1.73558	0.805661	0.914319	2.51	2.64	2.19	2.14	1.47	4.23	1.89	3.61	2.3	2.77
mml-miR-301a-3p	-0.058956	2.83004	0.812934	0.919548	5.51	6.01	6.69	7.33	5.46	2.58	7.55	8.92	4.81	2.77
mml-miR-331-3p	-0.0381742	11.8585	0.817601	0.921805	3013.19	3184.6	2383.62	3509.67	3073.87	3085.61	2396.72	3406.05	3805.11	3130.51
mml-miR-502-5p	-0.067531	1.44513	0.830068	0.929037	2.02	2.17	2.07	1.47	1.89	2.67	2.41	1.4	2.62	2.25
mml-miR-190b	0.0576122	4.27486	0.830417	0.929037	16.14	15.94	16.19	21.88	19.21	7.27	25.26	17.53	12.24	8.71
mml-miR-337-3p	0.0539715	3.05645	0.832094	0.929037	7.25	6.89	16.92	4.06	4.62	3.4	14.88	3.21	5.47	4
mml-miR-30c-5p	-0.035114	13.5631	0.84747	0.943152	10104.5	10465.8	12952.8	8206.21	8072.51	11186.5	10327.1	8660.06	11973.2	10902.8
mml-miR-421	-0.0321453	6.35143	0.854052	0.947421	67.68	69.96	73.02	54.36	54.59	88.75	68.33	66.53	60.23	84.76
mml-miR-15a-5p	-0.030552	10.3178	0.858552	0.94936	1032.46	1141.11	1551.39	1029.22	869.2	680.05	2004.97	1154.92	767.89	636.68
mml-miR-192-5p	-0.0296295	9.14736	0.866048	0.954589	464.26	493.57	415.51	405.1	452.61	583.85	378.86	407.78	679.68	507.95
mml-miR-151-5p	0.0284892	6.59035	0.874187	0.960492	80.48	80.99	85.68	79.85	92.39	64.01	84.68	96.18	79.14	63.95
mml-miR-493-3p	0.0504858	1.69915	0.877287	0.960838	2.49	2.74	5.48	1.69	1.89	0.92	7.13	1.9	1.2	0.72
mml-let-7i-5p	-0.031192	12.7239	0.884401	0.965565	5430.21	5975.94	7862.1	6749.23	4784.98	2324.53	10552.2	7321.78	2977.98	3051.79
mml-miR-769-5p	0.033575	2.26738	0.896916	0.976139	3.85	3.87	3.77	3.16	3.88	4.6	3.46	3.21	5.03	3.79
mml-miR-500b-5p	-0.0284776	3.68183	0.902675	0.979317	10.56	10.85	11.08	6.54	10.81	13.8	10.38	8.52	13.66	10.86
mml-miR-501-3p	-0.0490498	0.766381	0.908207	0.98223	1.16	1.27	1.1	0.79	1.57	1.2	0.42	1.8	1.31	1.54
mml-miR-152-3p	0.0253449	2.66945	0.917731	0.984107	5.18	5.19	6.09	4.17	5.04	5.43	5.45	4.31	5.68	5.33
mml-miR-150-5p	0.0163261	14.6666	0.920361	0.984107	21454.6	21939.1	24065.6	25901.3	16239	19612.5	22766.3	29895.1	16804.3	18290.6
mml-miR-485-5p	-0.0357999	1.67485	0.922711	0.984107	2.32	2.69	3.16	1.8	2.2	2.12	5.14	2.61	0.77	2.25
mml-miR-451	0.0180325	15.5009	0.923082	0.984107	40487.1	38943.9	40375.6	22048.8	33897.1	65626.8	40849.4	25372.4	47187	42366.8
mml-miR-296-3p	0.0202103	4.32565	0.927792	0.984107	16.27	16.67	16.67	22.56	11.23	14.62	18.34	22.64	9.29	16.4
mml-miR-31-5p	-0.0364879	1.04238	0.929204	0.984107	1.42	1.7	2.31	0.9	1.47	1.01	3.77	1.2	1.53	0.31
mml-miR-660-3p	-0.0241519	2.28697	0.92991	0.984107	3.79	4.04	3.53	3.16	3.78	4.69	2.72	3.41	6.12	3.89
mml-miR-130b-3p	0.0176141	4.62076	0.937077	0.98415	20.35	20.82	28.36	18.27	15.75	19.04	26.1	24.45	12.35	20.4
mml-miR-299-5p	-0.0137735	6.66526	0.93744	0.98415	88.4	88.76	190.11	42.18	69.61	51.69	179.11	51.2	78.81	45.92
mml-miR-155	0.0136468	7.51072	0.942475	0.98415	148.17	158.64	212.62	158.45	116.01	105.59	228.68	219.42	90.73	95.73
mml-miR-487b-3p	-0.0172074	3.45537	0.942921	0.98415	9.2	9.58	21.3	4.85	5.77	4.87	22.43	5.21	5.14	5.53
mml-miR-1255b	0.0179172	2.42533	0.944214	0.98415	4.3	4.34	4.02	3.5	4.09	5.61	5.03	4.21	3.5	4.61
mml-miR-146a-5p	0.0109263	7.61859	0.951603	0.988864	162.9	166.71	173.8	191.05	114.02	172.73	214.32	190.47	126.03	136.01
mml-miR-30b-5p	0.00865397	10.6097	0.965168	0.989007	1334.13	1338.13	1933.91	984.67	1025.85	1392.11	1429.18	973.67	1720.07	1229.59
mml-miR-758-3p	-0.0163787	1.39287	0.965646	0.989007	2.1	2.07	5.23	0.45	1.26	1.47	4.61	1.2	1.86	0.61
mml-miR-501-5p	-0.017154	0.652204	0.966613	0.989007	1.09	1.15	1.34	1.02	0.73	1.29	1.05	0.6	0.98	1.95
mml-miR-7184-3p	-0.0145827	1.0003	0.968454	0.989007	1.44	1.48	0.97	1.13	1.26	2.39	0.73	1.9	1.42	1.84
mml-miR-7189-3p	-0.00960896	1.14783	0.980107	0.989007	1.68	1.66	2.19	2.71	0.63	1.2	2.62	1.2	0.98	1.84
mml-miR-323a-3p	-0.00453204	5.14745	0.981829	0.989007	30.41	30.23	61.46	23.8	17.53	18.85	55.96	26.45	17.38	21.11
mml-miR-182	-0.00448644	4.88174	0.982632	0.989007	24.09	24.68	25.44	29.89	22.99	18.03	21.38	31.56	24.38	21.42
mml-miR-423-3p	-0.00346491	12.8924	0.983831	0.989007	6234.72	6500.51	4344.91	6358.56	6806.44	7428.95	4258.63	5606.88	8118.62	8017.93
mml-miR-125a-5p	0.00322826	8.8234	0.984804	0.989007	377.5	385.94	442.77	360.55	388.56	318.14	355.7	396.66	458	333.41
mml-miR-125b-5p	0.00312778	8.93026	0.985255	0.989007	403.14	417.9	395.91	382.88	474.24	359.52	331.28	392.35	560.64	387.32
mml-miR-30c-2-3p	0.00584533	1.36814	0.985822	0.989007	1.89	2.05	3.04	2.71	0.63	1.2	3.46	3.41	0.33	1.02
mml-miR-584-3p	0.00342464	5.40825	0.986141	0.989007	34.16	35.6	18.86	41.84	38.95	36.97	17.08	45.29	36.07	43.97
mml-miR-3146	0.00189961	1.66651	0.995015	0.995015	2.46	2.49	3.16	1.47	1.99	3.22	2.2	2	1.86	3.89

## Sheet: F. PairedDE_miRNA_Grp4_Grp2
PairedDE_miRNA_Group4_vs_Group2_1
names	logFC	logCPM	PValue	FDR	Group4	Group2	Group4:1	Group4:12	Group4:16	Group4:23	Group4:28	Group2:4	Group2:7	Group2:13	Group2:19	Group2:27
mml-miR-144	-0.746082	6.80629	0.00569312	0.958494	69.41	121.1	86.08	104.79	38.26	66.44	51.49	217.24	115.77	76.77	142.2	53.54
mml-miR-376c-5p	1.01241	1.23483	0.0112852	0.958494	2.52	1.28	1.85	0.76	2.83	3	4.14	0.78	0.67	3.11	1.05	0.81
mml-miR-128a-5p	-0.834786	0.829234	0.027348	0.958494	0.98	1.72	0.33	1.42	1.06	0.66	1.44	1.35	1.84	2.58	1.48	1.35
mml-miR-146b-5p	0.5376	2.6997	0.0401234	0.958494	6.44	4.54	7.19	7.2	5.43	7.98	4.4	2.13	6.6	4.19	6.55	3.24
mml-miR-150-3p	-0.583941	2.02571	0.0417055	0.958494	2.68	4.01	3.16	2.65	2.36	3.19	2.03	2.35	4.68	3.11	5.24	4.68
mml-miR-758-3p	0.660303	1.30891	0.0460614	0.958494	2.52	1.54	2.62	1.14	2.83	4.41	1.61	0.67	1.17	2.25	2.45	1.17
mml-miR-4766-3p	0.44525	4.33477	0.0478835	0.958494	21.25	14.82	15.69	6.44	39.09	20.93	24.09	9.98	6.26	24.7	19.48	13.68
mml-miR-382-3p	0.550161	1.61827	0.0513943	0.958494	3.07	2.04	2.72	1.71	2.72	5.82	2.37	1.79	1.25	2.04	3.58	1.53
mml-miR-204-5p	0.400474	3.42774	0.0556661	0.958494	10.63	7.6	11.55	3.88	10.04	7.79	19.87	9.19	4.26	5.58	6.11	12.87
mml-let-7b-5p	-0.431616	12.8036	0.0591862	0.958494	5406.95	6860.17	4384.44	9463.09	3757.74	5499.55	3929.95	8255.5	7184.97	5717.46	7981	5161.89
mml-miR-379-5p	0.457922	4.08278	0.0607718	0.958494	16.55	12.01	13.18	28.99	10.51	21.21	8.88	13.45	22.47	9.56	8.82	5.76
mml-miR-33b-5p	-0.655835	1.445	0.0669378	0.958494	1.72	2.71	0.98	1.23	2.72	1.88	1.78	4.26	2.09	2.68	2.79	1.71
mml-miR-543-5p	0.628519	1.24482	0.0675771	0.958494	2.37	1.44	1.96	2.27	2.48	3.94	1.18	1.35	1.5	1.5	1.31	1.53
mml-miR-369-5p	0.412279	4.11042	0.0684861	0.958494	17.62	12.5	15.15	16.67	13.94	30.68	11.67	11.99	14.12	11.81	14.67	9.9
mml-miR-7184-3p	-0.824007	0.960568	0.0694843	0.958494	1.14	1.91	0.44	1.89	1.42	1.6	0.34	0.9	1	2.25	3.23	2.16
mml-miR-376a-1-5p	0.672891	0.567111	0.0721478	0.958494	1.38	0.84	0.87	0.85	1.54	1.69	1.94	0.78	0.58	0.97	0.87	0.99
mml-miR-654-3p	0.343055	7.8912	0.0803814	0.958494	238.76	186.62	198.53	149.31	310.7	327.12	208.14	134.74	131.39	256.19	255.48	155.32
mml-miR-365-3p	0.376213	3.56071	0.0840633	0.958494	11.88	8.88	10.24	7.48	21.61	11.26	8.79	6.5	7.43	12.24	12.75	5.49
mml-miR-494-3p	0.397818	5.45109	0.0849449	0.958494	44.08	33.85	39.01	29.75	46.29	68.31	37.03	34.86	27.73	33.28	55.46	17.91
mml-miR-23b-5p	-0.375707	3.04075	0.0850913	0.958494	6.14	7.78	7.3	7.77	5.2	6.19	4.23	7.85	7.68	7.62	9.26	6.48
mml-miR-1255a-5p	0.583533	0.787636	0.0935738	0.958494	1.58	1.06	0.76	2.18	2.48	1.31	1.18	0.22	1.59	1.61	0.87	0.99
mml-miR-877-3p	-0.344827	3.42349	0.0936915	0.958494	8.2	10.38	6.54	4.74	12.4	8.26	9.05	6.95	5.6	13.31	11.01	15.03
mml-miR-127-3p	-0.395605	2.64478	0.110567	0.958494	4.66	5.86	4.03	7.11	2.95	6.66	2.54	4.37	6.93	5.48	8.21	4.32
mml-miR-376a-3p	0.379483	4.36341	0.117957	0.958494	20.15	16.16	16.13	18.1	18.89	29.47	18.18	16.48	11.11	17.07	27.69	8.46
mml-miR-30c-2-3p	-0.448678	2.05108	0.120757	0.958494	2.98	3.87	0.54	3.79	1.06	5.54	3.97	1.46	3.68	2.04	7.95	4.23
mml-miR-16-2-3p	-0.470166	6.81962	0.129266	0.958494	81.13	125.22	66.9	29.28	139.59	96.65	73.21	132.61	43.02	114.03	286.31	50.13
mml-miR-155	0.282286	8.37538	0.135727	0.958494	314.49	257.33	298.34	367.13	217.29	393.46	296.23	275.19	324.83	156.76	255.65	274.2
mml-miR-15a-3p	-0.447294	1.95255	0.136333	0.958494	2.7	3.71	3.38	2.08	3.54	1.69	2.79	5.38	3.34	4.19	3.93	1.71
mml-miR-205	-0.503374	1.51642	0.144731	0.958494	1.81	2.83	0.98	1.52	1.89	2.63	2.03	0.67	1.17	3.01	4.45	4.86
mml-miR-550-5p	-0.581294	0.594455	0.156457	0.958494	0.91	1.33	0.87	1.52	0.83	0.56	0.76	1.01	1.17	1.18	1.83	1.44
mml-miR-1262-5p	0.431721	1.82208	0.157382	0.958494	3.3	2.48	2.72	0.85	2.01	4.22	6.68	3.25	0.25	1.61	2.62	4.68
mml-miR-16-1-3p	-0.423922	2.75971	0.158076	0.958494	4.63	6.73	4.14	5.02	4.84	4.32	4.82	9.42	9.02	6.76	6.46	1.98
mml-miR-376c-3p	0.29402	3.30981	0.16842	0.958494	9.76	7.67	7.52	6.06	8.86	19.24	7.1	7.4	7.1	6.44	13.1	4.32
mml-miR-340-5p	-0.375081	7.64858	0.170939	0.958494	145.41	213.35	113.65	174.71	120.34	224.93	93.42	258.04	131.8	147.63	453.05	76.22
mml-miR-374a-3p	-0.596265	0.918483	0.172989	0.958494	1.08	1.85	0.98	0.95	1.18	0.94	1.35	3.47	1.42	0.64	2.79	0.9
mml-miR-874-3p	-0.463939	0.870741	0.175252	0.958494	1.16	1.62	0.87	1.33	0.71	1.78	1.1	0.67	2.17	1.4	2.62	1.26
mml-miR-493-5p	0.423963	3.2713	0.184055	0.958494	9.58	6.34	8.83	20.75	3.9	11.45	2.96	5.49	11.94	3.22	4.19	6.84
mml-miR-1240	-0.264605	3.77772	0.199703	0.958494	10.91	12.82	8.17	6.82	12.87	9.1	17.58	8.97	7.6	15.78	15.55	16.2
mml-miR-499-5p	-0.363355	1.72754	0.211772	0.958494	2.33	2.99	2.4	2.65	1.18	3.28	2.11	4.04	4.09	1.61	2.71	2.52
mml-miR-335-5p	0.366365	4.2033	0.212845	0.958494	18.01	14.94	10.35	10.9	17.95	26.65	24.18	11.21	8.77	14.6	33.37	6.75
mml-miR-23a-3p	0.214813	11.1283	0.214297	0.958494	2147.73	1828.28	1606.44	1441.04	2761.86	2724.86	2204.48	1214.86	1403.82	1839.47	2341.76	2341.48
mml-miR-576-5p	0.295606	5.70258	0.217419	0.958494	53.16	39	40.21	14.31	66.25	50.67	94.35	31.95	17.29	43.91	51.53	50.31
mml-miR-376b-5p	0.423213	1.20777	0.218988	0.958494	2.2	1.57	2.07	0.66	2.72	3.75	1.78	1.35	1.09	2.79	1.75	0.9
mml-miR-423-5p	-0.237687	11.9543	0.219104	0.958494	3148.89	3754.1	3295.36	3377.2	2925.89	3262.74	2883.25	3329.71	3185.34	2766.61	4930.71	4558.14
mml-miR-148a-5p	0.325767	3.05311	0.221192	0.958494	7.7	6.53	6.54	4.74	7.2	12.01	8.03	3.03	4.51	3.97	8.56	12.6
mml-miR-92b-5p	-0.411791	1.43188	0.225136	0.958494	1.81	2.5	0.87	1.71	1.65	1.88	2.96	1.35	1	3.22	2.71	4.23
mml-miR-154-5p	0.280893	5.459	0.225944	0.958494	42.63	35.38	35.63	28.8	50.19	58.55	39.99	22.64	25.22	55.4	38.61	35.01
mml-miR-141-3p	-0.497427	0.384822	0.226581	0.958494	0.77	1.09	0.33	0.85	0.35	1.41	0.93	0.45	1.25	0.75	2.01	0.99
mml-miR-181a-5p	-0.339833	7.25682	0.230597	0.958494	116.47	149.04	113.54	178.68	81.48	151.17	57.49	109.07	173.15	61.95	237.22	163.78
mml-miR-4446-3p	-0.36504	1.71865	0.241162	0.958494	2.42	2.99	0.87	2.56	1.54	4.5	2.62	2.13	2.51	3.11	5.07	2.16
mml-miR-1226	-0.232434	7.84582	0.243079	0.958494	189.01	218.84	122.26	112.18	250.48	198.47	261.65	146.39	131.05	325.33	238.45	252.96
mml-miR-433-3p	0.4781	0.773934	0.245005	0.958494	1.59	1.06	2.07	0.47	1.77	2.44	1.18	0.56	0.75	0.97	1.31	1.71
mml-miR-299-5p	0.262209	6.51729	0.247769	0.958494	90.21	73.54	83.03	56.28	96.95	142.07	72.7	57.17	50.45	78.06	110.66	71.36
mml-miR-192-5p	0.233608	8.9932	0.252024	0.958494	504.75	406.53	311.96	180.96	753.44	435.22	842.19	322.15	152.94	648.62	515.68	393.26
mml-miR-186-5p	0.19087	11.3839	0.252338	0.958494	2589.28	2150.73	2158	1207.12	3867.8	2411.82	3301.65	1813.66	1352.03	2895.88	2415.22	2276.86
mml-miR-26a-2-3p	0.23952	3.5789	0.253933	0.958494	11.23	9.29	12.97	4.74	12.28	9.57	16.57	13.9	4.34	10.09	8.73	9.36
mml-miR-598-3p	-0.341605	1.67637	0.256239	0.958494	2.34	2.97	1.74	2.56	3.78	2.16	1.44	2.69	1.92	4.62	3.93	1.71
mml-miR-323a-3p	0.270017	5.25	0.257332	0.958494	36.89	30.31	27.35	35.53	35.43	56.49	29.67	27.8	19.38	28.45	45.42	30.51
mml-miR-133c-3p	-0.660702	3.1979	0.264047	0.958494	7.25	8.21	6.1	0.76	1.89	12.11	15.39	6.61	11.69	8.91	3.49	10.35
mml-miR-1306-5p	-0.244587	7.66636	0.26513	0.958494	162.21	190.81	138.71	137.85	196.04	119.83	218.62	175.76	116.6	214.53	192.68	254.49
mml-miR-9-5p	0.259997	2.59784	0.267599	0.958494	5.53	4.72	4.14	5.78	4.02	7.88	5.83	3.03	4.68	3.11	8.56	4.23
mml-miR-337-5p	-0.32011	2.74769	0.270369	0.958494	5.16	6.1	3.81	7.77	2.24	9.1	2.87	5.6	9.77	6.66	5.68	2.79
mml-miR-148b-5p	0.236251	4.04841	0.272083	0.958494	15.27	12.92	13.08	16.3	15.23	15.11	16.65	14.35	15.7	12.45	10.22	11.88
mml-miR-194-3p	-0.357971	1.14374	0.274038	0.958494	1.51	1.97	1.31	1.99	1.42	1.5	1.35	1.46	1.75	3.01	2.01	1.62
mml-let-7i-3p	-0.243802	4.57559	0.274761	0.958494	18.76	22.21	21.36	17.05	23.62	16.05	15.72	31.83	16.54	23.51	19.83	19.35
mml-miR-496	0.422277	0.486641	0.277717	0.958494	1.19	0.87	0.54	1.23	1.42	1.31	1.44	0.56	1	0.86	1.22	0.72
mml-miR-331-5p	-0.254518	5.53891	0.280917	0.958494	36.59	42.46	40.86	50.02	36.49	30.31	25.28	51	46.94	37.47	34.06	42.84
mml-miR-374a-5p	0.253817	6.69052	0.28102	0.958494	96.36	79.06	114.08	135.96	59.52	105.29	66.96	106.38	104.66	53.69	64.98	65.6
mml-miR-7	0.263763	11.3313	0.281679	0.958494	2456.88	2032.67	1589	2852.89	1459.76	3845	2537.74	2588.66	2758.02	1470.01	2369.54	977.12
mml-miR-98	0.277172	6.67166	0.282617	0.958494	95.99	78.02	87.39	138.99	59.16	125.09	69.32	82.28	129.8	64.42	55.29	58.31
mml-miR-33a	-0.5717	0.776693	0.28322	0.958494	0.95	1.68	0.65	1.33	0.47	1.13	1.18	3.03	0.42	1.29	3.06	0.63
mml-miR-190b	0.298886	5.18393	0.285338	0.958494	32.4	29.61	46.42	24.35	26.69	36.32	28.24	65.8	23.8	27.49	17.38	13.59
mml-miR-148a-3p	-0.250331	9.71353	0.285523	0.958494	678.37	807.4	376.25	725.16	460.57	944.38	885.48	831.17	672.38	557.68	1456.89	518.89
mml-miR-409-5p	0.207575	3.73349	0.290716	0.958494	12.81	10.73	8.83	10.23	13.46	23.74	7.78	9.19	8.69	9.99	18.69	7.11
mml-miR-370-3p	-0.2898	5.25793	0.290989	0.958494	31.89	32.91	28.98	68.88	12.4	35.75	13.44	38.9	41.76	23.62	39.92	20.34
mml-miR-454-3p	0.236997	9.12114	0.292145	0.958494	501.03	451.9	512.89	550.93	375.3	603	463.03	571.56	764.43	377.62	300.29	245.59
mml-miR-30b-5p	0.213921	10.3622	0.294478	0.958494	1286.03	1042.54	957.56	598.68	1618.83	1211.73	2043.34	993.92	689.76	1592.3	1082.36	854.38
mml-miR-584-5p	-0.174579	9.36655	0.294853	0.958494	544.91	595.65	365.24	929.24	460.21	695.53	274.33	392.88	1033.3	470.71	690.36	391.01
mml-miR-197-3p	-0.200551	11.5548	0.296042	0.958494	2425.91	2851.15	2292.25	1587.7	3119.92	2583.07	2546.61	1828.79	1964.27	3064.67	2813.16	4584.86
mml-miR-424-3p	-0.269982	5.10992	0.301396	0.958494	28.75	30.8	29.53	45.76	30.94	31.25	6.26	31.61	39.84	29.53	38.08	14.94
mml-miR-152-3p	0.226106	3.30468	0.304023	0.958494	8.87	7.85	11.55	9.38	3.42	11.35	8.62	13.23	5.93	2.79	11.09	6.21
mml-miR-133d-3p	-0.642184	4.23457	0.310126	0.958494	15.64	16.46	10.79	1.8	3.66	24.4	37.54	14.35	25.81	16.96	6.64	18.54
mml-miR-542-5p	-0.292148	2.08513	0.310561	0.958494	3.21	3.82	1.85	5.02	4.49	3.1	1.61	4.15	4.84	4.4	4.11	1.62
mml-miR-206	-0.34965	1.64589	0.311211	0.958494	2.26	2.72	2.62	1.71	0.59	3.19	3.21	2.24	3.42	2.04	2.01	3.87
mml-miR-933	0.351522	1.01235	0.312486	0.958494	1.77	1.35	0.33	1.52	3.31	0.66	3.04	0.34	1.25	2.04	0.44	2.7
mml-miR-149-5p	-0.359809	2.43246	0.31251	0.958494	2.99	5.65	3.49	1.23	1.42	1.13	7.69	3.36	0.5	1.5	1.75	21.15
mml-miR-337-3p	0.233445	3.02681	0.315382	0.958494	7.87	6.34	5.34	3.69	9.33	12.76	8.2	5.49	4.59	9.13	7.16	5.31
mml-miR-323b-3p	0.229237	6.33238	0.318182	0.958494	76.79	66.28	66.69	52.2	73.45	110.26	81.33	72.3	38.34	61.42	104.55	54.8
mml-miR-192-3p	0.305084	1.66779	0.318917	0.958494	2.93	2.33	1.53	1.71	4.96	2.25	4.23	1.91	0.84	3.87	2.53	2.52
mml-miR-196a-5p	0.222103	7.8048	0.319827	0.958494	211.42	173.73	157.45	320.42	106.05	333.5	139.66	157.94	313.22	113.28	171.72	112.49
mml-miR-29c-5p	0.229769	5.8967	0.329006	0.958494	57.8	47.99	47.4	25.86	89.04	56.77	69.92	26.9	32.66	74.09	52.23	54.08
mml-miR-409-3p	0.181106	9.79873	0.330719	0.958494	832.77	740.56	631.11	850.22	793.83	1108.79	779.89	784.54	567.47	792.39	1064.98	493.42
mml-miR-96	-0.360846	1.0269	0.33081	0.958494	1.37	1.77	0.98	1.71	1.42	2.06	0.68	0.67	2.92	1.07	2.18	1.98
mml-miR-450a-1-3p	-0.266843	2.20578	0.332999	0.958494	3.49	4.2	3.27	4.26	4.49	4.22	1.18	4.71	6.35	3.11	5.42	1.44
mml-miR-135a-5p	0.321808	1.34293	0.333771	0.958494	2.31	1.75	5.01	1.04	2.24	1.5	1.78	3.25	1.5	1.61	0.7	1.71
mml-miR-200a-3p	-0.401829	0.463441	0.334854	0.958494	0.84	1.12	0.76	1.61	0.59	0.56	0.68	0.34	2.17	0.97	0.96	1.17
mml-miR-374b-5p	0.242025	6.95878	0.335198	0.958494	113.78	99.14	145.68	104.88	101.8	129.97	86.57	112.88	163.29	69.25	68.39	81.89
mml-miR-628-3p	0.18745	3.47062	0.336444	0.958494	10.02	8.79	7.3	13.07	6.85	13.14	9.72	6.84	12.53	5.05	11.18	8.37
mml-miR-199a	0.234314	3.98401	0.338277	0.958494	15.7	11.91	7.85	3.69	12.52	17.17	37.28	5.83	4.01	17.82	13.36	18.54
mml-miR-101-1-5p	-0.327021	1.32109	0.339611	0.958494	1.71	2.26	2.29	1.61	1.3	2.16	1.18	3.47	3.26	1.93	1.92	0.72
mml-miR-937	-0.406677	0.807088	0.347059	0.958494	1.1	1.58	0.98	0.95	1.77	0.94	0.85	0.22	1.09	2.15	1.48	2.97
mml-let-7f-5p	0.235094	13.2675	0.347396	0.958494	8950.2	7682.92	7712.92	15236.8	4893.8	9301.48	7606.03	9660.92	13379.4	6121.82	4547.45	4705
mml-miR-1249	-0.257643	6.50371	0.349147	0.958494	76.59	90.6	56.22	20.65	194.97	82.01	29.08	32.62	26.31	229.02	106.56	58.49
mml-miR-7180-3p	-0.210001	4.42509	0.351589	0.958494	17.53	20.03	10.68	18.47	22.67	21.77	14.03	11.21	18.04	23.08	25.07	22.77
mml-miR-431	0.227832	4.7868	0.351959	0.958494	27.07	21.45	21.9	30.98	25.86	45.7	10.91	16.48	24.89	18.68	30.74	16.47
mml-miR-942-3p	0.236831	2.73775	0.352057	0.958494	6.22	5.04	5.12	7.01	9.8	2.91	6.26	5.6	4.26	7.09	4.19	4.05
mml-miR-138-3p	-0.204704	3.11644	0.354108	0.958494	6.93	8.06	5.12	6.16	6.97	10.04	6.34	8.74	5.6	6.98	12.84	6.12
mml-miR-143-3p	-0.40289	2.45129	0.356131	0.958494	3.92	5.36	6.21	4.26	3.78	3.57	1.78	1.12	4.59	7.52	9	4.59
mml-let-7a-3p	0.263171	6.52616	0.356921	0.958494	93.98	71.46	57.1	23.31	138.17	85.86	165.45	60.19	24.31	115.53	102.02	55.25
mml-miR-329-3p	0.200966	2.96054	0.357958	0.958494	7.57	6.19	7.08	2.37	10.39	13.61	4.4	6.73	2.26	7.84	9.43	4.68
mml-miR-375	-0.42215	1.38163	0.366972	0.958494	1.77	2.33	3.38	1.42	0.94	2.53	0.59	0.9	4.76	0.97	3.23	1.8
mml-miR-362-5p	-0.198297	4.54041	0.367114	0.958494	19.39	21.83	14.71	14.59	25.74	28.06	13.86	13.45	18.96	25.23	32.06	19.44
mml-miR-532-3p	-0.145622	9.46195	0.369554	0.958494	586.92	648.89	585.13	433.16	716.83	530.18	669.31	600.59	429.74	890.31	658.57	665.21
mml-miR-30c-5p	0.200282	13.3079	0.371212	0.958494	9823.1	8094.81	7687.42	4919.89	12065.4	9421.12	15021.7	7679.01	5319.5	11161.8	8886.23	7427.5
mml-miR-7186-3p	0.239833	6.01157	0.37208	0.958494	61.76	53.33	56.01	30.79	104.28	60.43	57.32	56.72	34.33	85.9	68.04	21.69
mml-miR-29c-3p	-0.191022	9.48408	0.372165	0.958494	560.63	652.92	499.16	923.08	379.08	519.77	482.05	850.89	986.69	645.94	459.16	321.9
mml-miR-26b-5p	0.187383	11.2844	0.372914	0.958494	2254.26	1959.57	1682.6	4255.08	1368.47	2403.28	1561.89	2173.59	3615.91	1616.46	1278.36	1113.55
mml-miR-543-3p	0.231889	3.17981	0.372936	0.958494	8.86	7.02	7.08	7.77	8.27	17.74	3.47	4.71	5.18	6.33	12.05	6.84
mml-miR-1185-3p	0.309929	1.00327	0.373216	0.958494	1.69	1.4	1.42	2.65	1.77	1.69	0.93	1.91	2.42	1.18	0.79	0.72
mml-miR-656-3p	0.386789	0.264821	0.373373	0.958494	1.02	0.72	0.87	0.28	1.06	1.97	0.93	0.78	0.42	0.64	0.96	0.81
mml-miR-3146	0.31965	1.42992	0.377374	0.958494	2.47	2	1.09	1.61	4.13	3.85	1.69	2.02	0.84	1.72	4.28	1.17
mml-miR-485-5p	0.282846	1.82898	0.378225	0.958494	3.2	2.7	2.29	3.88	2.72	5.07	2.03	2.35	1.5	1.61	5.42	2.61
mml-miR-190a-5p	0.244463	6.58323	0.37988	0.958494	104.2	76.36	77.25	13.36	7.44	360.99	61.97	114.89	11.61	7.95	215.74	31.59
mml-let-7g-5p	0.20629	12.6681	0.3801	0.958494	5783.06	5191.21	6371.59	8974.21	3433.81	5984.22	4151.45	7330.52	8598.56	4289.44	2766.95	2970.61
mml-miR-99a-5p	0.223483	4.82777	0.382635	0.958494	27.05	24.39	26.04	11.65	19.96	57.8	19.78	18.61	14.45	8.7	59.57	20.61
mml-miR-26a-5p	0.169519	12.0456	0.384102	0.958494	3820.49	3396.29	4813.53	4712.69	2972.18	4031.08	2572.99	3774.16	4850.84	1991.5	2998.94	3366.03
mml-miR-1180-3p	-0.228908	8.79863	0.391837	0.958494	356.62	421.35	382.89	354.91	389.24	461.12	194.95	263.87	415.29	319.53	493.05	615
mml-miR-3200-3p	-0.187196	7.45365	0.391989	0.958494	143.98	163.78	82.92	146.28	197.81	127.53	165.36	95.95	120.61	236.21	167.18	198.97
mml-miR-139-5p	0.339211	0.820491	0.392998	0.958494	1.5	1.19	0.98	1.61	0.47	2.91	1.52	0.34	0.67	1.07	2.27	1.62
mml-miR-377-3p	0.257209	1.85894	0.39708	0.958494	3.5	2.62	2.94	2.08	2.72	8.07	1.69	2.58	1.67	2.47	3.93	2.43
mml-miR-378a	-0.187961	7.17557	0.399285	0.958494	114.6	133.53	103.19	166.94	90.46	127.43	84.96	107.16	211.99	70.54	158.62	119.33
mml-miR-18a-5p	-0.172478	3.84085	0.399788	0.958494	11.53	13.08	13.4	9.28	13.46	11.35	10.14	16.93	13.61	13.96	13.36	7.56
mml-miR-17-3p	-0.203132	2.70617	0.406798	0.958494	5.27	5.81	6.76	4.26	5.31	7.23	2.79	6.17	5.93	4.29	7.51	5.13
mml-miR-335-3p	0.204413	4.13964	0.407435	0.958494	17.42	13.66	18.52	4.26	24.09	21.02	19.19	11.88	7.77	14.71	17.73	16.2
mml-miR-4677-5p	0.349746	0.402956	0.407861	0.958494	1.11	0.85	1.09	0.47	1.42	1.13	1.44	0.9	0.75	1.18	0.96	0.45
mml-miR-378d	-0.200764	4.49005	0.410691	0.958494	17.69	20.53	17.54	25.86	15.35	18.96	10.74	23.32	28.9	9.66	24.37	16.38
mml-miR-1235	-0.244935	2.2911	0.413603	0.958494	3.95	4.6	2.4	0.66	6.73	7.32	2.62	1.79	0.67	7.62	6.99	5.94
mml-miR-100-5p	0.429095	0.702196	0.414115	0.958494	1.4	1.07	1.53	1.71	2.13	1.13	0.51	0.11	1.42	0.64	1.92	1.26
mml-miR-30c-1-3p	-0.176956	5.05424	0.414629	0.958494	27.19	30.58	23.75	27.95	28.34	30.12	25.78	27.13	29.74	36.08	34.76	25.2
mml-miR-1304	0.188763	5.64543	0.415843	0.958494	44.22	39.76	42.28	64.99	24.92	38.85	50.05	52.24	63.48	19.97	28.04	35.1
mml-miR-1271-5p	0.196426	6.94904	0.418132	0.958494	120.8	95.76	102.42	117.01	265.12	68.13	51.32	65.46	131.14	155.04	71.27	55.88
mml-miR-6505-3p	0.250262	1.76004	0.421396	0.958494	3.19	2.4	2.4	0.85	4.49	2.72	5.5	2.13	1.59	2.79	2.79	2.7
mml-miR-107-3p	-0.148681	8.28056	0.425259	0.958494	253.97	281.94	267.18	362.3	195.56	295.03	149.81	252.32	440.18	190.37	346.84	179.98
mml-miR-942-5p	0.143962	10.9847	0.42668	0.958494	1884.48	1662.69	1984.97	1190.16	2878.77	1615.04	1753.46	1432.32	1211.87	2026.83	1405.09	2237.36
mml-miR-150-5p	-0.182874	14.36	0.426852	0.958494	17297.8	19536.5	15407.6	17629.9	17567	20220.8	15663.4	14887.9	18889.2	19491.1	23956.9	20457.6
mml-miR-222-3p	-0.175397	7.93319	0.429382	0.958494	198.99	219.11	300.52	186.07	189.66	189.83	128.84	249.85	294.18	162.99	183.07	205.45
mml-miR-320a	-0.166109	11.5073	0.437296	0.958494	2379.37	2685.87	2941.34	2396.33	2245.91	2669.31	1643.98	2213.49	2713.58	1694.19	3581.43	3226.63
mml-miR-31-5p	0.272763	1.07481	0.437467	0.958494	1.86	1.47	1.31	1.71	1.3	4.5	0.51	0.9	2.34	0.86	2.71	0.54
mml-miR-182	0.181763	5.11569	0.437626	0.958494	31.6	27.83	19.29	48.79	24.45	27.96	37.54	14.46	39.17	21.69	37.56	26.28
mml-miR-142-5p	-0.186766	12.7859	0.442005	0.958494	5724.55	6798.59	5237.18	3331.25	5618.54	6693.07	7742.73	8914.05	3338.19	5991.04	11207.2	4542.48
mml-let-7g-3p	-0.222307	1.73533	0.443703	0.958494	2.53	2.94	2.72	2.08	3.42	1.78	2.62	3.7	2.67	3.65	2.97	1.71
mml-miR-93-3p	0.180353	10.5379	0.445695	0.958494	1497.92	1158.53	1526.78	415.26	2714.38	1353.23	1479.97	814.69	836.51	1482.03	1415.4	1244.04
mml-miR-221-3p	-0.150889	11.9107	0.447646	0.958494	3167.09	3473.09	3670.4	3925.19	2659.94	4059.98	1519.95	3248.89	5663.96	2175.32	3778.56	2498.69
mml-miR-10a-5p	0.163263	5.73104	0.449485	0.958494	49.87	44.14	39.66	31.36	61.76	58.65	57.91	31.61	29.9	49.71	60.35	49.14
mml-miR-30e-5p	-0.137744	10.3689	0.450538	0.958494	1099.21	1205.28	1106.19	875.71	1323.48	953.02	1237.67	1522.89	1009.41	1283.4	1351.81	858.87
mml-miR-24-3p	0.120003	9.7512	0.450646	0.958494	786.12	719.38	602.89	853.06	908.85	919.33	646.48	505.31	954.28	765.44	734.56	637.32
mml-miR-4766-5p	0.197231	2.36398	0.452936	0.958494	4.61	4.05	3.49	4.45	5.31	6.01	3.8	4.82	4.76	4.08	4.54	2.07
mml-miR-361-5p	0.134704	11.3283	0.453704	0.958494	2405.13	2157.39	1846.37	1834.6	3327.17	2853.42	2164.07	1397.68	2072.52	2206.78	2874.21	2235.74
mml-miR-582-3p	0.217315	2.2696	0.461042	0.958494	4.49	3.4	0.98	1.04	5.31	1.31	13.78	1.57	0.84	4.19	1.14	9.27
mml-miR-28-5p	0.245532	1.47667	0.46151	0.958494	2.49	2.05	2.29	2.37	2.6	3.94	1.27	1.23	1.5	2.04	3.14	2.34
mml-miR-196b-5p	0.182593	4.24778	0.467936	0.958494	16.81	14.92	15.15	29.65	8.27	19.99	10.99	14.24	31.07	9.66	8.91	10.71
mml-miR-296-5p	-0.116752	10.0222	0.469051	0.958494	882.62	939.98	957.02	679.87	1040.52	939.13	796.54	846.63	915.36	950.44	1120.97	866.52
mml-miR-187-5p	-0.169623	5.33912	0.469168	0.958494	33.36	39.8	33.34	10.61	50.43	50.77	21.64	50.33	8.77	52.29	66.82	20.79
mml-miR-15b-5p	-0.171748	13.6533	0.47494	0.958494	10842.2	10966.1	9738.53	21828.4	6334.54	10846.6	5463.09	12079.5	16040.3	8625.48	9791.37	8293.94
mml-miR-449a-5p	0.239252	1.63858	0.477005	0.958494	2.4	2.4	1.09	6.16	1.54	1.6	1.61	0.9	7.68	1.72	0.61	1.08
mml-miR-194-5p	0.133711	8.31794	0.478953	0.958494	296.08	261.63	213.35	229.66	358.53	281.61	397.26	221.49	243.81	327.16	236.35	279.33
mml-miR-151-3p	0.116672	10.0308	0.480101	0.958494	977.12	867.74	595.81	683.47	1380.28	806.16	1419.86	602.27	612.16	1244.96	907.32	971.99
mml-miR-142-3p	0.146394	13.4571	0.483052	0.958494	10643.1	9272.48	10101.9	5651.3	15268.6	10404.1	11789.8	8118.19	6378.69	12118.5	10727.7	9019.26
mml-miR-181a-3p	0.143772	3.92411	0.484797	0.958494	14.32	12.68	9.15	7.96	18.54	23.18	12.77	8.41	9.02	11.06	23.15	11.79
mml-miR-652	-0.171908	8.12803	0.486297	0.958494	232.15	253.54	297.9	214.69	243.04	273.82	131.29	212.53	290	197.02	271.81	296.34
mml-miR-381-3p	0.154997	4.98983	0.488095	0.958494	29.41	26.45	28	25.3	30.94	39.04	23.76	18.94	25.56	34.57	33.02	20.16
mml-miR-29b-3p	0.156921	8.10075	0.489476	0.958494	248.9	221.88	221.74	256.66	226.15	202.88	337.06	310.61	227.36	217.21	183.86	170.35
mml-miR-296-3p	-0.148859	3.99666	0.49451	0.958494	13.14	14.73	6.21	13.45	16.77	15.48	13.78	6.17	11.69	17.18	20.26	18.36
mml-miR-503-3p	-0.148131	5.74256	0.498151	0.958494	44.87	48.01	41.95	59.88	55.39	50.67	16.49	50.44	63.23	54.76	50.75	20.88
mml-miR-130b-3p	0.156682	5.17291	0.500795	0.958494	31.33	29.47	34.87	43.2	25.86	26.27	26.46	43.27	44.77	22.23	20.18	16.92
mml-miR-210-3p	-0.125632	9.27845	0.502894	0.958494	503	563.1	462	735.77	431.63	534.59	351.01	630.97	820.14	628.97	477.33	258.09
mml-miR-101-3p	-0.146909	10.0019	0.505189	0.958494	807.84	918.82	722.2	1534.55	465.88	768.06	548.5	1343.32	1490.52	739.24	681.1	339.9
mml-miR-3140	0.180479	2.13882	0.505405	0.958494	4	3.39	2.51	2.84	4.96	5.91	3.8	2.58	3.76	3.54	3.93	3.15
mml-miR-185-3p	-0.180307	4.1979	0.510748	0.958494	14.23	16.92	12.97	18.85	15	12.39	11.92	9.19	18.46	12.35	15.63	28.98
mml-let-7d	0.123975	11.8481	0.512284	0.958494	3328.31	3000.48	3113.28	4455.37	2395.41	4036.43	2641.05	2662.42	4133.27	2319.84	2552.17	3334.71
mml-miR-200c-3p	-0.147335	3.65773	0.515512	0.958494	10	11	8.17	16.3	4.13	12.29	9.13	9.19	21.3	6.76	7.95	9.81
mml-miR-26b-3p	0.147326	5.81818	0.515585	0.958494	51.04	47.67	39.99	37.8	66.84	46.83	63.74	32.06	27.23	71.29	40.27	67.49
mml-miR-324-3p	-0.139397	7.36726	0.516118	0.958494	137.89	152.78	119.42	102.99	173.48	136.72	156.82	98.53	113.93	185.21	181.85	184.39
mml-miR-106b-3p	-0.145409	11.5035	0.51647	0.958494	2425.25	2621.21	2840.22	2476.95	2675.29	2736.78	1397.03	2040.42	2822.67	2247.69	2781.8	3213.49
mml-miR-195-5p	0.209939	1.10206	0.516595	0.958494	1.79	1.59	2.51	1.8	1.42	1.97	1.27	2.8	1.59	1.5	1.05	0.99
mml-miR-889-3p	0.209867	1.51185	0.516821	0.958494	2.46	2.15	2.4	3.22	2.24	3.1	1.35	3.7	1.84	1.61	2.27	1.35
mml-miR-183-5p	-0.147374	3.24288	0.517762	0.958494	7.42	8.21	4.69	16.58	4.02	6.76	5.07	3.03	17.12	4.51	9.08	7.29
mml-miR-627-5p	0.172686	6.37502	0.51913	0.958494	75.71	68.2	59.28	83.28	75.46	77.42	83.1	92.03	62.14	69.9	75.9	41.04
mml-miR-1306-3p	-0.245944	0.716309	0.520534	0.958494	1.13	1.35	0.98	1.23	1.3	1.31	0.85	1.12	0.92	1.07	1.48	2.16
mml-miR-451	0.168965	15.3666	0.523287	0.958494	39692.6	34543.4	48304.1	21606.9	44577.2	44292.3	39682.6	33808	23301.3	29121	42741.8	43745.3
mml-miR-363-3p	0.161386	4.79839	0.52928	0.958494	26.57	22.52	30.84	11.65	39.56	31.53	19.28	20.4	12.61	22.12	28.21	29.25
mml-miR-19a-3p	-0.17012	7.40295	0.532414	0.958494	135.45	159.7	118.77	126.01	119.39	163.93	149.13	221.38	161.87	139.9	205.78	69.56
mml-miR-30d-3p	0.132125	3.39829	0.533581	0.958494	9.31	8.59	8.39	10.42	9.33	10.79	7.61	10.76	11.36	7.73	7.51	5.58
mml-miR-491-3p	0.164949	3.62678	0.534772	0.958494	11.54	10.05	9.81	4.36	14.53	10.42	18.6	10.2	4.59	16.64	12.32	6.48
mml-miR-550-3p	0.164228	2.33733	0.538818	0.958494	4.52	4.05	4.47	3.41	5.9	5.16	3.64	3.59	2	4.29	5.33	5.04
mml-miR-184	-0.287338	0.750752	0.541792	0.958494	1.1	1.48	0.65	1.14	1.06	1.88	0.76	0.56	0.67	2.68	0.96	2.52
mml-miR-628-5p	0.169725	2.13991	0.543898	0.958494	3.9	3.35	2.29	4.74	2.36	6.38	3.72	2.35	4.93	2.36	3.41	3.69
mml-miR-7204-3p	0.139465	5.9329	0.54679	0.958494	57.96	50.18	46.64	29.75	88.45	55.36	69.58	40.02	33.66	58.41	64.55	54.26
mml-miR-145-5p	0.188669	1.81358	0.547191	0.958494	3.09	2.76	2.4	2.08	4.96	2.53	3.47	2.24	3.01	4.83	2.53	1.17
mml-miR-382-5p	0.147506	6.25762	0.5495	0.958494	71.73	58.8	56.22	139.37	31.41	94.03	37.62	64.57	88.62	40.59	69.09	31.14
mml-miR-425	0.156817	14.1757	0.551757	0.958494	17734.4	14983.3	20653.4	7691.68	25797.1	18139.9	16390.1	12433.1	10736.4	13852.8	18555.7	19338.6
mml-miR-486-3p	-0.237407	1.28697	0.554994	0.958494	1.93	2.05	3.16	1.04	1.89	3.28	0.25	1.57	1.34	1.29	4.54	1.53
mml-miR-320b	-0.158382	5.44863	0.557338	0.958494	35.69	40.21	40.53	35.62	34.72	44.01	23.59	29.82	39.09	26.41	53.72	52.01
mml-miR-199a-5p	0.143239	3.85819	0.557868	0.958494	14.24	11.02	6.76	3.41	11.34	16.8	32.89	7.51	4.09	14.82	12.4	16.29
mml-miR-92a-3p	-0.1945	16.7235	0.559599	0.958494	87557.5	100123	117803	79155.4	91776.7	87314.2	61738.1	84759.9	79854.4	82015.3	108830	145157
mml-miR-503-5p	-0.129265	7.30158	0.561056	0.958494	130.46	138.28	107.55	257.51	135.22	119.83	32.21	151.55	233.45	164.6	107.69	34.11
mml-miR-187-3p	-0.106249	9.80467	0.565427	0.958494	765.64	817.89	672.95	716.54	680.57	1153.74	604.38	837.22	529.14	988.99	1072.23	661.88
mml-miR-421	0.139615	6.42843	0.566954	0.958494	79.32	71.15	58.62	72.86	82.67	89.05	93.42	76.78	70.25	66.68	88.13	53.9
mml-miR-99b-5p	0.130156	5.90564	0.56892	0.958494	55.44	51.29	44.46	41.12	35.78	92.62	63.24	46.97	30.32	35.11	96.34	47.7
mml-miR-299-3p	0.174	2.24363	0.571996	0.958494	4.14	3.59	2.72	8.53	2.6	4.5	2.37	4.26	5.68	3.97	2.71	1.35
mml-miR-500b-5p	0.137077	3.34534	0.57566	0.958494	9.43	8.28	10.68	5.78	13.11	11.73	5.83	5.6	8.52	7.62	12.93	6.75
mml-miR-30a-5p	-0.128446	6.76772	0.580316	0.958494	93.3	96.9	35.3	82.24	51.13	105.57	192.25	42.6	81.52	55.4	142.63	162.34
mml-miR-27a-5p	-0.219352	0.769636	0.580505	0.958494	1.25	1.33	0.54	2.27	1.42	1.69	0.34	1.12	2	1.4	1.05	1.08
mml-miR-29a-3p	-0.120622	7.77299	0.582507	0.958494	186.69	189.3	143.5	330.37	139.82	200.53	119.2	159.84	240.22	183.39	209.97	153.07
mml-miR-19b	0.132858	12.1734	0.582601	0.958494	4323.92	3865.98	3353.98	2439.81	5155.5	4754.1	5916.23	4467.22	2859.84	4346.99	5371.53	2284.33
mml-miR-338-3p	0.151436	4.61375	0.58711	0.958494	22.53	18.9	11.33	40.93	16.06	24.4	19.95	14.46	22.3	18.36	13.28	26.1
mml-miR-369-3p	0.225533	1.17884	0.588247	0.958494	2.04	1.45	0.98	5.59	0.59	2.44	0.59	1.91	2.26	1.07	1.57	0.45
mml-miR-330-3p	0.164418	1.58271	0.5909	0.958494	2.56	2.32	2.18	2.18	3.07	2.25	3.13	1.57	1.25	2.58	3.32	2.88
mml-miR-660-3p	0.153068	1.84652	0.591192	0.958494	3.24	2.77	2.83	1.33	5.55	2.53	3.97	1.68	1.92	4.29	3.06	2.88
mml-miR-30e-3p	0.109286	8.20977	0.5917	0.958494	271.61	248.58	228.17	193.84	347.43	278.6	310.01	269.47	207.14	330.38	252.51	183.4
mml-miR-424-5p	-0.135141	6.35331	0.593803	0.958494	64.66	75.21	63.74	106.02	67.31	67.38	18.85	117.36	98.89	78.49	67.17	14.13
mml-miR-23b-3p	0.0887193	9.65256	0.593819	0.958494	743.55	690.97	666.96	457.13	962.82	950.86	679.96	601.26	459.64	653.03	1043.75	697.16
mml-miR-486-5p	-0.163848	17.0776	0.594069	0.958494	115199	127363	138996	61118	143827	104476	127581	101695	75838.7	162096	126357	170829
mml-miR-500b-3p	0.237691	0.620509	0.595424	0.958494	1.29	1.07	1.09	1.14	2.13	1.69	0.42	0.9	0.84	1.93	0.44	1.26
mml-miR-103-3p	-0.102009	12.9413	0.596624	0.958494	6517.96	6962.76	6092.97	10130	4532.32	7401.08	4433.47	5957.49	11653.3	4841	7418.95	4943.03
mml-miR-4677-3p	0.170055	1.74059	0.59718	0.958494	2.96	2.54	2.18	1.33	2.6	3.38	5.33	2.35	1.25	3.97	2.88	2.25
mml-miR-191-3p	-0.117803	6.3611	0.600851	0.958494	69.48	76.12	43.26	65.75	85.38	83.52	69.49	42.48	64.4	103.4	99.31	71
mml-miR-199a-3p	-0.163596	5.38087	0.608089	0.958494	33.44	38.82	42.39	53.25	14.41	32.56	24.6	19.84	39.84	19.43	80.36	34.65
mml-miR-128b-3p	0.0891196	11.5985	0.608977	0.958494	2881.41	2616.91	2087.61	1598.97	4494.88	2529.49	3696.11	2340.83	1496.78	3929.86	2794.99	2522.09
mml-miR-128a-3p	0.0915307	11.8119	0.612814	0.958494	3338.1	3043.36	2322.97	1988.65	5068.46	3089.04	4221.36	2665.78	1801.4	4483.24	3425.52	2840.84
mml-miR-148b-3p	0.100046	9.48983	0.615157	0.958494	664.49	602.21	340.4	855.05	669.95	786.92	670.15	461.82	499.57	634.45	892.82	522.4
mml-miR-32-5p	-0.111812	4.06929	0.621134	0.958494	13.27	15.06	21.68	13.45	10.98	10.6	9.64	29.93	13.45	8.27	14.76	8.91
mml-miR-940	-0.226116	0.501879	0.624934	0.958494	1.04	1.1	0.65	0.66	2.13	1.41	0.34	0.56	0.75	1.18	1.4	1.62
mml-miR-636	-0.116337	4.13884	0.627699	0.958494	14.96	15.64	14.82	7.86	23.15	12.29	16.65	10.87	11.19	16.43	17.03	22.68
mml-miR-340-3p	0.118345	6.61976	0.628531	0.958494	91	82.78	83.03	44.34	108.17	98.72	120.72	94.83	43.02	113.81	96.08	66.14
mml-miR-6505-5p	0.201294	0.443698	0.630415	0.958494	1.09	0.95	0.44	0.85	1.54	1.6	1.01	1.01	0.58	1.5	1.22	0.45
mml-let-7a-5p	0.127558	15.2052	0.632322	0.958494	33727.3	30545.4	32412.2	51201.2	22103.8	37168.4	25751	33958.4	47993	26381.2	21462.4	22932.1
mml-miR-493-3p	0.116546	2.54887	0.634012	0.958494	5.16	4.52	4.03	9.76	2.72	6.66	2.62	3.47	7.43	3.22	5.59	2.88
mml-miR-7172-5p	-0.130197	1.90832	0.63665	0.958494	3	3.23	2.51	1.14	3.66	3.19	4.48	1.57	1.84	4.19	3.49	5.04
mml-miR-134-5p	0.11051	5.2536	0.636854	0.958494	34.88	30.76	27.89	52.2	24.21	47.11	23	33.07	38.76	27.27	33.28	21.42
mml-miR-411-5p	0.167281	1.39053	0.637912	0.958494	2.27	1.86	2.18	4.74	0.94	2.82	0.68	2.58	2.84	1.5	1.57	0.81
mml-miR-7205-3p	-0.111141	5.70234	0.639528	0.958494	42.85	47.71	34.65	19.9	59.05	35.47	65.18	27.69	24.72	47.89	40.35	97.91
mml-miR-432-5p	-0.134027	5.60494	0.639645	0.958494	42.38	41.26	26.59	80.44	20.78	56.87	27.22	46.07	44.85	35.43	53.19	26.73
mml-miR-126	0.0950686	10.3306	0.643305	0.958494	1135.53	1032.66	1400.93	1948.38	373.06	1273.1	682.16	1605.28	1648.46	600.41	870.55	438.62
mml-miR-505-3p	-0.111326	5.99754	0.649978	0.958494	53.98	59.37	33.56	47.56	66.01	74.98	47.77	33.96	35.16	80.1	72.15	75.5
mml-miR-27a-3p	-0.105444	6.23714	0.650588	0.958494	64.11	67.92	42.17	68.59	66.84	70.94	72.03	57.28	58.89	82.57	81.67	59.21
mml-miR-21-5p	0.0727478	9.34093	0.651048	0.958494	576.56	546.01	629.59	714.17	478.04	710.07	350.93	636.46	698.02	383.42	666.69	345.48
mml-miR-342-5p	-0.127915	2.46548	0.653517	0.958494	4.47	4.79	2.18	7.96	2.95	5.54	3.72	2.35	4.43	4.19	8.73	4.23
mml-let-7i-5p	0.10752	13.6549	0.653577	0.958494	11309.8	10632.1	11340.3	15560.5	8042.65	12094.4	9510.98	13112.9	15865.2	9640.99	6587.88	7953.59
mml-miR-324-5p	-0.0959166	7.4922	0.656291	0.958494	154.55	160.73	138.82	104.41	191.67	129.4	208.48	151.55	113.85	199.82	176.17	162.25
mml-miR-21-3p	-0.150235	1.00769	0.657328	0.958494	1.48	1.68	1.09	1.89	1.54	1.69	1.18	1.46	1.42	2.25	2.36	0.9
mml-miR-301a-5p	-0.16578	0.521153	0.665034	0.965883	1.01	1.14	0.54	0.85	1.42	1.22	1.01	0.67	0.58	1.72	1.48	1.26
mml-miR-542-3p	0.136351	1.69086	0.670632	0.967109	2.72	2.55	2.18	4.17	3.19	2.72	1.35	3.81	2.76	2.25	3.23	0.72
mml-miR-487b-5p	0.117703	1.92627	0.671163	0.967109	3.29	3.04	2.83	2.94	3.66	4.32	2.71	2.47	1.75	3.44	3.84	3.69
mml-miR-491-5p	-0.105665	7.36854	0.67824	0.972159	143.48	150.63	148.73	91.62	210.32	170.88	95.87	95.17	126.63	147.1	225.35	158.92
mml-miR-372-3p	0.136593	1.7645	0.67998	0.972159	3.1	2.6	7.52	0.76	0.71	5.82	0.68	6.61	0.42	1.29	3.76	0.9
mml-miR-487b-3p	0.082633	3.68988	0.685118	0.975136	11.6	10.93	9.59	11.56	11.57	18.02	7.27	11.88	8.77	9.45	17.73	6.84
mml-miR-500a-3p	-0.0860675	4.74922	0.689044	0.975136	22.97	23.97	17.33	25.68	23.38	30.97	17.5	18.38	25.89	26.09	30.4	19.08
mml-miR-361-3p	-0.0787688	11.6451	0.691502	0.975136	2746.69	2927.39	2217.06	1904.04	3565.84	2700.56	3345.95	2832.13	1914.33	4301.89	3604.75	1983.85
mml-miR-146a-5p	-0.0748991	8.09226	0.696884	0.975136	230.1	238.63	205.18	375.84	180.8	235.91	152.76	224.97	350.56	193.7	280.55	143.36
mml-miR-7186-5p	-0.098873	5.7883	0.698167	0.975136	47.6	47.26	57.75	68.5	43.81	49.92	18.01	48.31	60.39	37.36	53.8	36.45
mml-miR-6827-3p	0.0849152	4.04142	0.701249	0.975136	15.06	13.77	11.66	9.19	13.23	23.55	17.67	8.97	10.36	16.64	16.42	16.47
mml-miR-590-3p	0.10291	2.58726	0.702629	0.975136	5.02	4.86	5.12	8.72	3.19	5.35	2.71	7.73	7.85	3.87	2.97	1.89
mml-miR-15a-5p	0.0825167	11.4358	0.703377	0.975136	2363.84	2327.88	2609.76	3372.18	1401.77	2740.72	1694.78	2958.91	4169.19	1903.78	1331.46	1276.07
mml-miR-3200-5p	0.0997166	2.00663	0.717403	0.980642	3.4	3.21	3.27	2.94	3.31	3.66	3.8	1.79	3.42	2.15	4.28	4.41
mml-miR-301a-3p	-0.101822	4.02013	0.721138	0.980642	12.88	14.58	9.7	18.57	8.98	14.64	12.51	16.48	24.47	14.17	12.49	5.31
mml-miR-373	0.126913	1.50768	0.728	0.980642	2.24	2.47	4.9	0.47	0.94	4.04	0.85	7.4	0.25	0.86	3.49	0.36
mml-miR-532-5p	-0.0802162	7.09714	0.730595	0.980642	115.96	124.04	90.77	119.19	144.19	125.55	100.1	135.97	125.37	132.92	157.74	68.21
mml-miR-28-3p	0.075425	7.44115	0.735461	0.980642	156.77	148.58	105.58	169.59	158.36	184.77	165.53	106.49	107.33	171.79	186.3	170.98
mml-miR-668	0.134641	0.432012	0.739133	0.980642	1.03	0.93	1.2	1.14	0.59	1.31	0.93	0.56	0.92	0.97	1.31	0.9
mml-miR-502-5p	-0.124983	1.19974	0.740172	0.980642	1.86	1.83	1.53	1.14	3.54	2.25	0.85	1.35	2.09	1.72	1.83	2.16
mml-miR-181d	0.109879	1.07419	0.74057	0.980642	1.7	1.55	1.31	3.03	0.83	2.72	0.59	0.9	2.92	0.75	2.36	0.81
mml-miR-29b-2-5p	-0.0721286	4.54653	0.741162	0.980642	19.42	20.26	15.69	27.85	17.24	20.08	16.23	19.39	30.32	17.82	16.42	17.37
mml-let-7f-3p	0.092353	5.13782	0.741542	0.980642	34.99	28.19	17	5.97	50.54	35.94	65.52	17.49	9.77	48.53	38.69	26.46
mml-miR-4796-3p	0.121433	0.707833	0.741783	0.980642	1.31	1.16	0.87	1.52	2.01	1.13	1.01	0.78	1.59	0.86	1.31	1.26
mml-miR-10b-5p	-0.0971984	2.24911	0.747084	0.980642	3.79	4.18	4.58	3.88	2.72	4.13	3.64	2.24	3.34	4.62	6.99	3.69
mml-miR-7165-3p	0.0907154	2.21983	0.747948	0.980642	4.09	3.8	2.62	1.99	6.97	3.66	5.24	1.23	2.51	5.05	5.07	5.13
mml-miR-130a-3p	0.0703484	3.92926	0.748109	0.980642	12.91	12.65	12.97	19.42	7.2	14.73	10.23	17.26	20.88	7.95	10.31	6.84
mml-miR-223	0.0842051	15.1673	0.751192	0.980642	33964.1	30906.6	21314.9	24134	35160.9	39680	49530.7	30407.1	19563.7	34782.4	36202.8	33577.2
mml-miR-7180-5p	0.091097	6.44618	0.76031	0.980642	81.51	74.44	56.22	28.61	148.21	96.37	78.12	30.6	45.27	74.3	91.71	130.31
mml-miR-27b-3p	0.0606832	8.25496	0.763808	0.980642	271.02	256.63	217.05	363.34	256.5	302.44	215.75	306.12	299.02	242.76	259.06	176.2
mml-miR-18b	-0.0694463	4.81524	0.764396	0.980642	23.13	25.25	23.86	25.49	24.92	25.24	16.15	25.67	38.51	28.78	21.14	12.15
mml-miR-16-5p	0.0991697	17.2734	0.764481	0.980642	136088	130785	132678	223245	79776.6	131174	113569	177001	220349	104843	78221.3	73510
mml-miR-1255b	0.0755558	2.78356	0.765088	0.980642	6.01	5.62	3.49	6.92	5.08	6.94	7.61	4.93	6.35	6.66	6.46	3.69
mml-miR-330-5p	-0.061114	3.00283	0.766874	0.980642	6.79	7.01	5.23	3.98	10.86	6.19	7.69	5.16	4.01	10.84	6.2	8.82
mml-miR-34a-5p	0.0772296	6.91162	0.767333	0.980642	108.37	96.36	53.28	198.2	65.54	139.26	85.56	72.08	168.64	64.74	72.32	104.03
mml-miR-181c-3p	0.0795908	1.88287	0.768973	0.980642	3.18	2.95	1.42	3.6	3.07	5.35	2.45	1.46	3.17	3.76	4.11	2.25
mml-miR-132-3p	-0.069857	3.03546	0.775347	0.981132	7.03	7.12	7.95	4.55	6.14	12.11	4.4	5.27	7.52	4.51	11.44	6.84
mml-miR-339-5p	0.0629877	14.1082	0.782291	0.981132	15861.9	15465.9	18395.1	9676.07	20864.8	16453.5	13920.2	15975.5	8813.55	22551.8	19655.9	10332.4
mml-miR-18a-3p	0.0761492	9.17913	0.783871	0.981132	531.96	498.04	577.5	192.99	860.19	613.32	415.77	255.46	286.16	490.04	556.9	901.62
mml-miR-7189-3p	0.0964457	1.29307	0.785369	0.981132	1.99	1.83	1.09	3.41	1.42	2.25	1.78	1.23	1.75	1.29	1.66	3.24
mml-miR-342-3p	0.0464468	9.872	0.787522	0.981132	837.68	812.9	600.6	1111.81	954.55	981.54	539.88	480.76	942	771.67	1247.61	622.47
mml-miR-20a-5p	0.0658457	7.24326	0.793331	0.981132	127.2	128.08	206.05	138.7	87.27	120.96	83.02	164.66	239.55	92.34	66.91	76.94
mml-miR-671-5p	-0.0598567	4.49054	0.794338	0.981132	19.64	19.97	12.75	16.39	28.58	24.4	16.06	14.46	19.29	18.68	30.22	17.19
mml-miR-501-3p	0.0961388	0.63995	0.795998	0.981132	1.28	1.13	0.44	0.85	2.48	1.6	1.01	0.9	0.67	1.72	1.48	0.9
mml-miR-1262-3p	0.0672213	3.72295	0.797745	0.981132	11.18	11.26	6.65	6.54	4.72	14.73	23.25	9.86	3.01	6.01	10.31	27.09
mml-miR-20a-3p	-0.0681249	2.72842	0.798567	0.981132	5.25	5.88	6.32	4.93	5.31	5.44	4.23	8.86	7.85	3.44	6.81	2.43
mml-miR-1284	0.0930616	1.35232	0.799162	0.981132	2.14	2.01	1.85	1.42	3.78	2.06	1.61	1.35	0.84	1.93	2.88	3.06
mml-miR-140-5p	-0.0623757	6.48448	0.801931	0.981132	73.88	80.34	67.67	84.13	80.3	73.38	63.91	93.93	108	96.74	62.36	40.68
mml-miR-138-5p	-0.0608726	3.29738	0.81274	0.981132	8.52	8.45	6.65	7.77	8.03	16.61	3.55	5.49	13.95	5.8	11.09	5.94
mml-miR-22	0.0475052	10.5595	0.815701	0.981132	1318.77	1301.41	1249.8	1244.82	1593.2	1450.54	1055.49	833.97	1950.41	1115.36	1169	1438.33
mml-miR-6529-5p	-0.0485316	7.97009	0.81662	0.981132	218.3	227.17	143.07	168.07	288.38	252.05	239.93	159.17	142.75	221.08	337.32	275.55
mml-miR-95-3p	-0.110813	1.12007	0.819121	0.981132	1.46	1.76	0.54	4.36	0.12	1.6	0.68	0.78	6.01	1.18	0.44	0.36
mml-miR-505-5p	-0.0523429	2.71254	0.819479	0.981132	5.54	5.65	5.12	5.5	5.2	8.16	3.72	5.49	4.43	5.37	8.21	4.77
mml-miR-30d-5p	-0.0459392	12.9294	0.823765	0.981132	6726.6	6933	6112.58	5837.76	8263.37	5828.64	7590.64	6499.8	4566.85	7959.14	8168.88	7470.34
mml-miR-485-3p	0.0424941	8.54823	0.827291	0.981132	335.87	332.58	291.69	247.56	318.62	499.87	321.59	318.12	184.34	403.28	505.89	251.26
mml-miR-30a-3p	0.049025	4.73041	0.828204	0.981132	24.02	22.03	12.86	22.93	14.41	35.56	34.32	14.68	26.14	14.92	28.56	25.83
mml-miR-188-5p	-0.0655378	1.27484	0.830147	0.981132	1.99	1.98	0.98	0.76	4.02	2.25	1.94	1.12	1.17	3.54	2.45	1.62
mml-miR-450a-2-3p	-0.0886577	0.54092	0.831439	0.981132	1.04	1.14	0.44	1.42	1.54	1.22	0.59	1.12	1.59	1.93	0.61	0.45
mml-miR-191-5p	0.0662586	16.4667	0.833764	0.981132	81849.1	75673.3	60085.7	72128	84412.6	66880.1	125739	88080.2	58985.8	66859.3	92406.5	72034.5
mml-miR-224-5p	0.276662	1.13559	0.842185	0.981132	1.5	1.95	4.14	2.94	0.24	0.19	0	0	0.92	0	7.77	1.08
mml-miR-17-5p	0.0426467	8.62014	0.843931	0.981132	334.03	338.37	321.98	443.68	258.86	376.2	269.43	380.22	556.62	347.02	223.86	184.12
mml-let-7c-5p	-0.0431704	7.42421	0.845387	0.981132	149.72	145.99	124.33	227.48	89.28	200.34	107.2	133.95	204.05	120.25	153.72	117.98
mml-miR-1260b	-0.047589	5.30047	0.850202	0.981132	33.62	35	37.7	25.77	39.21	36.5	28.91	24.77	28.06	32.1	39.65	50.39
mml-let-7b-3p	0.0450333	5.49707	0.851819	0.981132	40.56	41.41	22.88	11.56	70.62	46.17	51.57	23.65	8.02	70.97	64.55	39.87
mml-miR-92b-3p	-0.0500564	7.37591	0.852155	0.981132	133.57	157.2	88.59	53.06	212.33	121.71	192.16	55.37	67.91	144.95	123.07	394.7
mml-miR-215-5p	0.0763389	0.497302	0.859765	0.981132	1.05	1.04	1.09	0.95	1.18	0.84	1.18	0.22	0.84	1.29	1.66	1.17
mml-miR-450b-5p	0.0633457	0.948273	0.860386	0.981132	1.61	1.45	1.2	1.33	3.07	1.69	0.76	1.35	1.59	1.4	2.1	0.81
mml-miR-362-3p	0.0728817	0.264382	0.862395	0.981132	0.92	0.85	1.2	0.47	1.18	1.22	0.51	0.9	0.33	1.07	1.22	0.72
mml-miR-7194-3p	0.0512936	2.20876	0.863801	0.981132	4.14	3.72	1.63	1.71	4.61	6.47	6.26	1.79	3.01	5.48	5.15	3.15
mml-miR-210-5p	-0.0513366	1.32018	0.871178	0.981132	2.03	2.01	2.29	1.52	3.31	1.78	1.27	1.46	2	2.25	2.71	1.62
mml-miR-6827-5p	-0.0645759	0.575242	0.871507	0.981132	1.08	1.1	0.44	1.23	0.59	2.06	1.1	0.67	1.84	0.86	1.22	0.9
mml-miR-6529-3p	0.0361686	4.72013	0.872891	0.981132	24.16	22.41	16.78	9.76	38.38	22.9	32.97	15.92	13.03	37.69	21.92	23.49
mml-miR-7194-5p	0.0694292	0.606432	0.874141	0.981132	1.17	1.1	0.22	1.42	1.3	1.31	1.61	0.9	0.67	0.86	2.1	0.99
mml-miR-605	-0.070657	0.675984	0.875877	0.981132	1.19	1.25	1.31	0.57	0.94	2.44	0.68	0.22	0.67	1.29	2.27	1.8
mml-miR-106a-5p	0.0409441	6.28924	0.880109	0.981132	65.42	67.77	64.51	86.78	48.65	75.26	51.91	75.66	118.36	71.08	40.27	33.48
mml-miR-1255a-3p	0.036724	3.19573	0.880744	0.981132	8.25	7.44	6.54	3.51	9.92	7.32	13.95	8.97	5.1	8.7	7.25	7.2
mml-miR-1-3p	-0.0694792	1.15122	0.883924	0.981132	1.58	1.8	1.42	0.85	0.59	2.25	2.79	0.9	4.43	0.75	1.66	1.26
mml-miR-423-3p	-0.038417	12.4436	0.886351	0.981132	4799.57	5023.38	5332.08	3207.89	6850.02	5168.68	3439.19	2773.06	3669.04	4708.4	6039.1	7927.31
mml-miR-140-3p	0.0302927	13.0695	0.888122	0.981132	7677.29	7403.84	6695.31	5699.62	9815	6385.1	9791.4	7762.86	4920.84	8998.27	8643.5	6693.72
mml-miR-125a-5p	0.0255684	8.67302	0.890257	0.981132	363.83	362.2	352.71	245.67	235.12	550.26	435.38	365.65	204.47	265.96	648.7	326.22
mml-miR-502-3p	-0.0314513	4.6649	0.892567	0.981132	22.55	22.39	19.94	15.73	30.94	31.25	14.88	14.91	20.05	24.16	32.93	19.89
mml-miR-93-5p	0.0379971	15.6338	0.895638	0.981132	43066.5	43394	38459	63824.2	31616	43639.7	37793.4	49775.4	72264	41911.1	28332.5	24687.1
mml-miR-211	-0.0369191	2.74242	0.895846	0.981132	6.16	5.19	5.23	0.57	7.56	3.66	13.78	4.26	2	7.84	4.19	7.65
mml-miR-221-5p	-0.027592	3.21184	0.89803	0.981132	7.76	7.97	7.08	8.24	6.5	10.89	6.09	6.84	11.78	4.62	9.87	6.75
mml-miR-25	-0.0335757	16.0554	0.902535	0.982746	58498.5	59421.8	50729.1	64413.5	65320.7	55895.1	56134.1	62291.2	63792.9	69975.2	50913.8	50136.1
mml-miR-30b-3p	-0.0421753	0.70428	0.91531	0.982746	1.22	1.26	0.76	1.8	1.54	1.22	0.76	0.56	0.92	1.4	2.27	1.17
mml-miR-339-3p	-0.017945	9.32735	0.916406	0.982746	571.98	562.33	822.67	326.96	712.81	610.7	386.77	652.49	384.13	595.05	798.06	381.92
mml-miR-1296-5p	0.0265046	7.01951	0.916593	0.982746	111.12	119	63.09	92.56	162.61	125.46	111.85	33.4	86.78	153.54	138.96	182.32
mml-miR-4446-5p	-0.0294721	2.01052	0.918622	0.982746	3.38	3.36	2.4	3.41	2.72	6.19	2.2	1.91	2.42	3.54	5.07	3.87
mml-miR-125b-5p	-0.0198695	9.01867	0.921938	0.982746	461.39	470.99	393.68	262.25	280.47	830.09	540.47	493.99	335.02	283.89	953.53	288.51
mml-miR-551a	0.0330199	1.18784	0.92453	0.982746	1.81	1.78	0.11	1.52	0.71	3.94	2.79	0.34	1.09	0.75	4.45	2.25
mml-miR-484	-0.0282901	13.4626	0.925061	0.982746	10154.1	9937.13	12110.3	4060.1	15818.1	11244.9	7537.04	5482.45	6613.65	9451.8	13285.7	14852
mml-miR-3122	-0.0176023	3.96498	0.931149	0.982746	13.37	13.49	11.55	12.89	16.3	15.48	10.65	11.43	18.96	14.07	12.75	10.26
mml-miR-5697-3p	-0.0270448	1.68029	0.934361	0.982746	2.71	2.58	2.29	1.14	5.08	2.35	2.71	3.59	2.51	3.01	1.75	2.07
mml-miR-26a-1-3p	-0.0201823	2.27448	0.936759	0.982746	4.06	4	5.34	2.18	4.49	2.72	5.58	4.82	2.84	5.48	2.71	4.14
mml-miR-181b-5p	-0.0219447	5.85061	0.938536	0.982746	49.75	49.92	52.85	64.43	42.04	67.47	21.98	35.42	75.92	27.16	61.49	49.59
mml-miR-660-5p	-0.0176793	5.69055	0.938897	0.982746	44.7	45.55	38.25	42.73	50.66	52.55	39.31	51.34	45.35	48.21	55.2	27.63
mml-miR-106b-5p	-0.0196946	6.62373	0.942382	0.982746	80.66	86.53	102.21	100.52	63.18	81.36	56.05	92.14	152.6	91.69	41.84	54.35
mml-miR-371-5p	-0.0279075	0.768594	0.942736	0.982746	1.33	1.33	3.27	0.47	0.59	1.88	0.42	2.58	0.58	0.21	2.71	0.54
mml-miR-7172-3p	0.0251484	0.751356	0.943084	0.982746	1.3	1.25	1.09	0.76	1.42	1.22	2.03	0.9	0.84	1.07	1.83	1.62
mml-miR-6790-3p	-0.0146729	4.13935	0.945965	0.982746	15.89	15.19	8.72	9.28	27.4	15.95	18.09	10.54	11.03	22.44	17.99	13.95
mml-miR-671-3p	0.0146791	7.6554	0.94784	0.982746	177.54	177.47	174.56	119.66	234.42	173.22	185.82	108.06	127.46	204.97	208.49	238.39
mml-miR-500a-5p	0.0150212	3.60847	0.953043	0.985349	10.98	10.2	12.42	5.87	15.35	13.79	7.44	7.62	10.94	10.52	10.92	10.98
mml-miR-664	-0.01169	3.10015	0.956552	0.986191	7.52	7.32	7.08	2.84	9.45	9.76	8.45	7.4	3.59	6.55	9.7	9.36
mml-miR-130b-5p	0.0102466	5.74856	0.966273	0.993416	48.14	46.22	57.31	26.81	68.14	51.24	37.2	40.58	29.65	55.3	46.55	59.03
mml-miR-769-5p	0.00838826	2.00982	0.974166	0.996093	3.45	3.45	1.53	1.42	6.73	4.04	3.55	1.46	1.34	7.19	4.11	3.15
mml-miR-331-3p	0.00409672	11.3851	0.979985	0.996093	2350.5	2337.16	2019.29	1447.48	3064.06	1811.63	3410.03	1820.16	1332.82	3542.57	2005.06	2985.18
mml-miR-374b-3p	0.00851001	0.303038	0.98581	0.996093	0.9	0.88	0.54	1.71	0.71	0.84	0.68	1.35	0.67	0.97	0.87	0.54
mml-miR-185-5p	-0.00293061	11.8076	0.986071	0.996093	3149.63	3109.83	2280.48	3105.76	3375.47	3421.98	3564.48	2389.48	3549.18	3059.19	3429.98	3121.34
mml-let-7e-5p	0.00369784	5.22041	0.987051	0.996093	32.33	30.97	27.24	52.01	20.08	35.28	27.05	30.49	44.19	24.8	27.95	27.45
mml-miR-15b-3p	0.0028954	11.1448	0.988236	0.996093	2086.6	1937.45	1700.03	797.45	3239.78	1817.54	2878.18	1948.39	1039.64	2720.76	2294.42	1684
mml-miR-584-3p	-0.00265445	4.14981	0.99126	0.996093	15.16	15.64	11.99	16.39	15.82	17.55	14.03	7.85	12.61	18.25	19.13	20.34
mml-miR-151-5p	-0.002363	6.3059	0.991621	0.996093	70.39	68.41	43.26	61.87	83.61	74.98	88.26	53.13	62.98	79.78	79.83	66.32
mml-miR-122a-5p	-0.00546196	6.49632	0.993372	0.996093	96.71	57.12	336.59	72	32.71	30.68	11.58	13.9	75.92	20.83	142.81	32.13
mml-miR-20b-5p	5.81919e-05	4.89782	0.999621	0.999621	25.62	25.97	22.56	23.02	26.45	33.5	22.57	28.36	35.5	28.35	22.45	15.21

## Sheet: G. PairedDE_miRNA_Grp6_Grp2
PairedDE_miRNA_Group6_vs_Group2_1
names	logFC	logCPM	PValue	FDR	Group6	Group2	Group6:5	Group6:9	Group6:17	Group6:21	Group6:29	Group2:4	Group2:7	Group2:13	Group2:19	Group2:27
mml-miR-146b-5p	1.139	3.04066	4.17747e-05	0.0153731	9.7	4.54	4.97	11.66	7.52	14.6	9.76	2.13	6.6	4.19	6.55	3.24
mml-miR-33b-5p	-1.03684	1.32117	0.00282845	0.347812	1.3	2.71	1.95	1.35	0.66	1.84	0.69	4.26	2.09	2.68	2.79	1.71
mml-miR-100-5p	1.16576	1.1295	0.00283542	0.347812	2.38	1.07	0.49	4.65	2.43	2.27	2.07	0.11	1.42	0.64	1.92	1.26
mml-miR-9-3p	1.32572	0.493303	0.00634074	0.524957	1.64	0.54	0.39	0.34	0.55	5.3	1.64	0.22	0.25	0.64	1.22	0.36
mml-let-7b-5p	-1.02418	12.6254	0.00713257	0.524957	3967.25	6860.17	6813.76	6362.84	1326.32	3522.79	1810.54	8255.5	7184.97	5717.46	7981	5161.89
mml-miR-9-5p	0.815245	3.03104	0.00894099	0.540997	9.62	4.72	3.12	6.42	3.87	22.06	12.61	3.03	4.68	3.11	8.56	4.23
mml-miR-184	-1.26677	0.446203	0.0102907	0.540997	0.53	1.48	0.39	0.68	0.22	0.65	0.69	0.56	0.67	2.68	0.96	2.52
mml-miR-342-3p	0.420938	10.1193	0.0169597	0.780144	1192.92	812.9	561.06	941.92	915.47	2719.97	826.16	480.76	942	771.67	1247.61	622.47
mml-miR-23a-3p	0.411137	11.2314	0.0218022	0.829827	2425.85	1828.28	1320.19	1918.06	3134.38	2877.72	2878.87	1214.86	1403.82	1839.47	2341.76	2341.48
mml-miR-151-3p	0.355048	10.1709	0.0251114	0.829827	1175.77	867.74	533.58	623.36	1516.32	1386.15	1819.44	602.27	612.16	1244.96	907.32	971.99
mml-miR-582-3p	0.734095	2.55795	0.0262414	0.829827	6.43	3.4	1.07	2.28	7.3	1.62	19.86	1.57	0.84	4.19	1.14	9.27
mml-miR-4766-3p	0.584857	4.44026	0.0285949	0.829827	23.71	14.82	6.92	11.49	40.26	22.92	36.96	9.98	6.26	24.7	19.48	13.68
mml-miR-496	0.798171	0.658077	0.0293145	0.829827	1.54	0.87	0.58	1.44	2.21	1.84	1.64	0.56	1	0.86	1.22	0.72
mml-miR-197-3p	-0.459165	11.4543	0.0378019	0.836109	2065.61	2851.15	1066.27	1622.81	3356.22	1977.27	2305.5	1828.79	1964.27	3064.67	2813.16	4584.86
mml-miR-432-5p	-0.529855	5.35218	0.0400074	0.836109	29.26	41.26	39.77	38.52	13.71	32.98	21.33	46.07	44.85	35.43	53.19	26.73
mml-miR-142-5p	-0.718849	12.5922	0.0449042	0.836109	4194.83	6798.59	2418.34	2082.87	3083.73	6659.8	6729.43	8914.05	3338.19	5991.04	11207.2	4542.48
mml-miR-194-5p	0.533022	8.52071	0.0449857	0.836109	380.33	261.63	266.69	293.73	409.63	394.87	536.76	221.49	243.81	327.16	236.35	279.33
mml-miR-128a-5p	-0.813347	0.804892	0.0458426	0.836109	0.96	1.72	1.36	1.1	0.44	1.3	0.6	1.35	1.84	2.58	1.48	1.35
mml-miR-3146	0.64464	1.60916	0.046814	0.836109	3.11	2	2.34	0.84	3.65	6.38	2.33	2.02	0.84	1.72	4.28	1.17
mml-miR-501-5p	0.94739	0.24336	0.0469028	0.836109	1.18	0.58	0.29	0.42	2.65	1.41	1.12	0.45	0.25	0.54	1.31	0.36
mml-miR-31-5p	0.673819	1.23506	0.0514152	0.836109	2.34	1.47	1.36	2.96	1.22	5.19	0.95	0.9	2.34	0.86	2.71	0.54
mml-miR-26a-5p	0.544866	12.2256	0.0547419	0.836109	4822.53	3396.29	5011.94	6968.88	4277.67	3296.38	4557.8	3774.16	4850.84	1991.5	2998.94	3366.03
mml-miR-16-1-3p	-0.67669	2.69136	0.0571863	0.836109	4.04	6.73	7.12	4.56	1.55	3.78	3.2	9.42	9.02	6.76	6.46	1.98
mml-miR-10b-5p	0.570213	2.58155	0.0608457	0.836109	6.09	4.18	2.63	8.7	7.3	6.05	5.79	2.24	3.34	4.62	6.99	3.69
mml-miR-139-5p	0.70942	0.988607	0.0626774	0.836109	1.91	1.19	0.49	2.53	1	2.7	2.85	0.34	0.67	1.07	2.27	1.62
mml-miR-500b-5p	0.574313	3.61832	0.0651645	0.836109	13.12	8.28	7.41	14.7	26.1	8.33	9.07	5.6	8.52	7.62	12.93	6.75
mml-miR-92b-5p	-0.720449	1.35378	0.0676979	0.836109	1.65	2.5	0.19	0.84	1.44	3.35	2.42	1.35	1	3.22	2.71	4.23
mml-miR-361-5p	0.37296	11.4648	0.0687018	0.836109	2877.93	2157.39	1303.43	2244.56	3852.67	3572.75	3416.23	1397.68	2072.52	2206.78	2874.21	2235.74
mml-miR-769-5p	0.554157	2.29855	0.0721339	0.836109	5.06	3.45	1.07	2.87	9.95	6.49	4.92	1.46	1.34	7.19	4.11	3.15
mml-miR-624	0.726071	0.335253	0.0736303	0.836109	1.13	0.71	0.78	1.1	0.88	1.41	1.47	0.34	0.5	0.75	1.22	0.72
mml-miR-584-5p	-0.390603	9.25432	0.0749759	0.836109	473.6	595.65	487.66	961.18	276.48	409.57	233.1	392.88	1033.3	470.71	690.36	391.01
mml-let-7b-3p	-0.66227	5.40187	0.0756028	0.836109	35.59	41.41	3.22	5.66	51.98	85.31	31.78	23.65	8.02	70.97	64.55	39.87
mml-miR-148b-5p	0.387642	4.12742	0.0772176	0.836109	16.75	12.92	18.23	19.77	17.25	11.14	17.36	14.35	15.7	12.45	10.22	11.88
mml-miR-16-2-3p	-0.829507	6.68099	0.079439	0.836109	62.27	125.22	23.98	32.1	97.21	79.04	79.02	132.61	43.02	114.03	286.31	50.13
mml-miR-30b-5p	0.346078	10.4239	0.0795213	0.836109	1389.6	1042.54	676.08	779.64	1615.63	1597.32	2279.33	993.92	689.76	1592.3	1082.36	854.38
mml-miR-192-3p	0.532692	1.73949	0.0841645	0.856194	3.22	2.33	1.95	1.86	4.31	4	3.97	1.91	0.84	3.87	2.53	2.52
mml-miR-296-5p	-0.270656	9.93994	0.0880587	0.856194	792.27	939.98	506.96	583.57	1012.24	1004.26	854.32	846.63	915.36	950.44	1120.97	866.52
mml-miR-338-3p	0.486327	4.71729	0.08842	0.856194	25.82	18.9	29.63	34.38	18.91	25.63	20.55	14.46	22.3	18.36	13.28	26.1
mml-miR-532-3p	-0.314447	9.38856	0.0911526	0.856194	525.96	648.89	405.4	297.19	632.91	739.14	555.15	600.59	429.74	890.31	658.57	665.21
mml-miR-206	-0.711116	1.55004	0.0930646	0.856194	1.87	2.72	3.9	2.7	0.88	0.76	1.12	2.24	3.42	2.04	2.01	3.87
mml-miR-30c-2-3p	-0.565675	2.0018	0.09571	0.859055	2.9	3.87	1.07	1.52	0.77	6.7	4.4	1.46	3.68	2.04	7.95	4.23
mml-miR-24-3p	0.276851	9.81028	0.0990239	0.863373	843.92	719.38	831.65	921.48	915.7	866.61	684.18	505.31	954.28	765.44	734.56	637.32
mml-miR-501-3p	0.578286	0.82949	0.107422	0.863373	1.65	1.13	0.68	1.69	1.77	2.38	1.73	0.9	0.67	1.72	1.48	0.9
mml-miR-628-3p	0.402281	3.5563	0.108378	0.863373	11.21	8.79	12.57	13.6	6.86	11.89	11.14	6.84	12.53	5.05	11.18	8.37
mml-miR-221-3p	-0.484597	11.8589	0.110714	0.863373	2870.57	3473.09	4685.99	5521.1	1532.46	1523.9	1089.4	3248.89	5663.96	2175.32	3778.56	2498.69
mml-miR-877-3p	-0.496989	3.45929	0.11176	0.863373	8.76	10.38	2.14	4.05	20.9	7.57	9.15	6.95	5.6	13.31	11.01	15.03
mml-miR-144	-0.650306	6.80402	0.112744	0.863373	71.56	121.1	74.67	112.69	39.92	61.96	68.57	217.24	115.77	76.77	142.2	53.54
mml-miR-99a-5p	0.446508	4.89784	0.114727	0.863373	29.32	24.39	13.35	24.5	25.77	54.82	28.15	18.61	14.45	8.7	59.57	20.61
mml-miR-194-3p	-0.596262	1.05677	0.11496	0.863373	1.36	1.97	0.68	1.01	1.44	2.81	0.86	1.46	1.75	3.01	2.01	1.62
mml-miR-186-5p	0.33153	11.4683	0.121371	0.893287	2872.57	2150.73	1278.67	1598.48	4397.99	3308.49	3779.22	1813.66	1352.03	2895.88	2415.22	2276.86
mml-miR-450a-1-3p	-0.557173	2.18595	0.124587	0.898978	3.24	4.2	6.53	5.24	1.77	2.16	0.52	4.71	6.35	3.11	5.42	1.44
mml-miR-23b-5p	-0.43487	3.01283	0.13035	0.917878	5.82	7.78	8.58	6.08	3.32	5.84	5.27	7.85	7.68	7.62	9.26	6.48
mml-miR-23b-3p	0.248722	9.73879	0.132194	0.917878	826.41	690.97	468.85	562.53	1127.48	1090.22	882.99	601.26	459.64	653.03	1043.75	697.16
mml-miR-7184-3p	-0.68547	0.983706	0.144432	0.928566	1.23	1.91	1.36	0.68	2.1	1.84	0.17	0.9	1	2.25	3.23	2.16
mml-miR-376c-5p	0.627038	0.961626	0.144926	0.928566	1.82	1.28	0.97	0.93	1.66	3.14	2.42	0.78	0.67	3.11	1.05	0.81
mml-miR-1240	-0.372501	3.74811	0.14607	0.928566	10.48	12.82	6.82	4.56	7.74	13.95	19.35	8.97	7.6	15.78	15.55	16.2
mml-miR-18a-5p	-0.371924	3.75981	0.146659	0.928566	9.97	13.08	12.18	13.43	8.07	5.95	10.19	16.93	13.61	13.96	13.36	7.56
mml-miR-628-5p	0.487904	2.36091	0.152449	0.928566	5.05	3.35	6.53	9.29	2.21	2.7	4.49	2.35	4.93	2.36	3.41	3.69
mml-miR-130b-5p	-0.369068	5.55076	0.153167	0.928566	35.24	46.22	26.22	27.71	51.09	32.76	38.43	40.58	29.65	55.3	46.55	59.03
mml-miR-940	-0.836372	0.388444	0.159739	0.928566	0.84	1.1	0	1.27	2.21	0.54	0.17	0.56	0.75	1.18	1.4	1.62
mml-miR-381-3p	0.367942	5.14803	0.160336	0.928566	36.43	26.45	14.33	24.75	60.16	36.01	46.9	18.94	25.56	34.57	33.02	20.16
mml-miR-7205-3p	-0.364925	5.62661	0.1631	0.928566	37.69	47.71	19.59	17.66	47.78	26.38	77.04	27.69	24.72	47.89	40.35	97.91
mml-miR-337-5p	-0.440706	2.63369	0.165707	0.928566	4.31	6.1	5.56	5.66	2.43	4.97	2.94	5.6	9.77	6.66	5.68	2.79
mml-miR-6827-3p	-0.315737	3.8366	0.166224	0.928566	11.1	13.77	6.63	7.27	12.61	14.49	14.51	8.97	10.36	16.64	16.42	16.47
mml-miR-143-3p	-0.649106	2.41811	0.170964	0.928566	3.75	5.36	1.66	10.56	2.43	1.84	2.25	1.12	4.59	7.52	9	4.59
mml-miR-19b	0.462901	12.3603	0.171019	0.928566	5497.05	3865.98	2670.41	3215.72	5962.31	7971.88	7664.93	4467.22	2859.84	4346.99	5371.53	2284.33
mml-miR-296-3p	-0.355711	3.93438	0.17163	0.928566	12.34	14.73	3.22	11.74	10.62	24.22	11.92	6.17	11.69	17.18	20.26	18.36
mml-miR-29b-3p	0.436435	8.23843	0.175637	0.928566	299.55	221.88	264.16	263.99	208.69	304.37	456.52	310.61	227.36	217.21	183.86	170.35
mml-miR-4446-3p	-0.450382	1.6612	0.175817	0.928566	2.26	2.99	1.36	2.28	1	4.76	1.9	2.13	2.51	3.11	5.07	2.16
mml-miR-183-5p	-0.464803	3.14465	0.176629	0.928566	6.79	8.21	4.68	19.68	2.32	3.14	4.15	3.03	17.12	4.51	9.08	7.29
mml-miR-362-5p	0.332349	4.83594	0.182102	0.936479	28.96	21.83	10.04	28.89	49.77	28.54	27.55	13.45	18.96	25.23	32.06	19.44
mml-miR-192-5p	0.340267	9.08205	0.183567	0.936479	565.57	406.53	159.37	215.42	781.33	782.6	889.12	322.15	152.94	648.62	515.68	393.26
mml-miR-195-5p	0.512408	1.32692	0.186785	0.936479	2.35	1.59	3.22	4.31	0.55	1.84	1.81	2.8	1.59	1.5	1.05	0.99
mml-miR-4677-5p	0.529925	0.476258	0.189754	0.936479	1.24	0.85	0.58	1.1	1.99	0.86	1.64	0.9	0.75	1.18	0.96	0.45
mml-miR-152-3p	0.352496	3.44962	0.190859	0.936479	10.33	7.85	18.62	11.49	2.1	12.11	7.34	13.23	5.93	2.79	11.09	6.21
mml-miR-1185-3p	0.4898	1.04636	0.201498	0.937178	1.82	1.4	1.85	1.77	1.66	2.27	1.55	1.91	2.42	1.18	0.79	0.72
mml-miR-187-3p	-0.228238	9.76938	0.201652	0.937178	706.37	817.89	781.75	356.75	537.47	968.58	887.31	837.22	529.14	988.99	1072.23	661.88
mml-miR-127-3p	-0.365775	2.59745	0.204043	0.937178	4.42	5.86	4.19	3.89	3.54	6.05	4.4	4.37	6.93	5.48	8.21	4.32
mml-miR-30e-5p	0.258506	10.5685	0.206909	0.937178	1464.39	1205.28	835.84	1077.26	1867	1464.97	2076.89	1522.89	1009.41	1283.4	1351.81	858.87
mml-miR-106b-3p	-0.285694	11.4202	0.208254	0.937178	2175.47	2621.21	1458.71	3142.9	2730.5	1918.66	1626.59	2040.42	2822.67	2247.69	2781.8	3213.49
mml-miR-200a-3p	-0.547575	0.447158	0.210164	0.937178	0.83	1.12	0.39	2.2	0.11	0.76	0.69	0.34	2.17	0.97	0.96	1.17
mml-miR-1260b	-0.332707	5.18419	0.217221	0.937178	28.61	35	12.96	29.31	45.9	24.22	30.66	24.77	28.06	32.1	39.65	50.39
mml-miR-550-3p	-0.477622	2.06485	0.220996	0.937178	2.99	4.05	1.27	3.72	4.87	3.35	1.73	3.59	2	4.29	5.33	5.04
mml-miR-101-3p	-0.309606	10.0293	0.22433	0.937178	841.51	918.82	1455	1621.21	192.1	417.68	521.56	1343.32	1490.52	739.24	681.1	339.9
mml-miR-27b-3p	0.338144	8.3737	0.232112	0.937178	315.67	256.63	346.62	322.79	242.64	325.67	340.62	306.12	299.02	242.76	259.06	176.2
mml-miR-485-3p	-0.337287	8.39856	0.235268	0.937178	267.37	332.58	201.19	123.84	247.61	464.93	299.25	318.12	184.34	403.28	505.89	251.26
mml-miR-28-5p	0.436985	1.56632	0.236664	0.937178	2.78	2.05	1.75	4.39	3.43	2.7	1.64	1.23	1.5	2.04	3.14	2.34
mml-let-7e-5p	-0.353827	5.09934	0.237081	0.937178	27.13	30.97	41.72	44.18	8.29	22.71	18.74	30.49	44.19	24.8	27.95	27.45
mml-miR-421	0.434936	6.58433	0.244201	0.937178	95.95	71.15	91.33	81.18	66.35	130.94	109.94	76.78	70.25	66.68	88.13	53.9
mml-miR-199a	0.30357	3.9977	0.245207	0.937178	16.19	11.91	4.87	4.14	16.04	25.52	30.4	5.83	4.01	17.82	13.36	18.54
mml-miR-335-5p	0.330928	4.20783	0.248922	0.937178	18.45	14.94	6.04	15.04	13.49	38.49	19.17	11.21	8.77	14.6	33.37	6.75
mml-miR-33a	-0.468392	0.793945	0.249478	0.937178	1.04	1.68	0.88	0.42	0.88	1.73	1.3	3.03	0.42	1.29	3.06	0.63
mml-miR-146a-5p	0.343672	8.31607	0.251895	0.937178	310.36	238.63	410.46	469.53	162.46	328.16	181.19	224.97	350.56	193.7	280.55	143.36
mml-miR-133c-3p	-0.414663	3.15632	0.258329	0.937178	6.87	8.21	4.58	3.29	16.26	3.03	7.17	6.61	11.69	8.91	3.49	10.35
mml-miR-874-3p	-0.454052	0.903946	0.258527	0.937178	1.32	1.62	0.58	1.1	0.66	3.57	0.69	0.67	2.17	1.4	2.62	1.26
mml-miR-376a-1-5p	0.440456	0.432731	0.258755	0.937178	1.17	0.84	0.49	0.76	1.66	1.3	1.64	0.78	0.58	0.97	0.87	0.99
mml-miR-21-5p	0.232926	9.45475	0.259761	0.937178	671.71	546.01	643.23	1342.43	445.13	378.76	549.02	636.46	698.02	383.42	666.69	345.48
mml-miR-181a-5p	-0.530469	7.17111	0.260854	0.937178	102.99	149.04	116.38	187.88	71.55	101.74	37.4	109.07	173.15	61.95	237.22	163.78
mml-miR-494-3p	0.292829	5.38167	0.262605	0.937178	40.18	33.85	24.86	29.65	43.13	61.96	41.28	34.86	27.73	33.28	55.46	17.91
mml-miR-101-1-5p	-0.365977	1.32187	0.269377	0.937178	1.69	2.26	2.44	2.87	1.11	1.08	0.95	3.47	3.26	1.93	1.92	0.72
mml-miR-1226	-0.379737	7.78936	0.270864	0.937178	172.27	218.84	96.6	82.53	210.57	216.68	254.95	146.39	131.05	325.33	238.45	252.96
mml-miR-376a-3p	0.299529	4.34189	0.27168	0.937178	20	16.16	8.29	15.12	23.67	36.01	16.93	16.48	11.11	17.07	27.69	8.46
mml-miR-29c-3p	-0.24269	9.45551	0.27344	0.937178	548.58	652.92	698.01	907.37	240.87	452.39	444.26	850.89	986.69	645.94	459.16	321.9
mml-miR-4446-5p	-0.326912	1.84743	0.276826	0.937178	2.64	3.36	1.46	2.11	2.65	4.22	2.76	1.91	2.42	3.54	5.07	3.87
mml-miR-493-5p	0.362356	3.29707	0.289828	0.937178	9.95	6.34	12.67	25.6	2.99	4.43	4.06	5.49	11.94	3.22	4.19	6.84
mml-miR-365-3p	0.262474	3.48063	0.290519	0.937178	10.73	8.88	6.34	7.43	12.72	19.03	8.12	6.5	7.43	12.24	12.75	5.49
mml-miR-320b	-0.329562	5.364	0.292935	0.937178	31.62	40.21	23.88	47.48	38.71	27.9	20.12	29.82	39.09	26.41	53.72	52.01
mml-miR-374a-5p	0.426103	6.88855	0.294765	0.937178	122.78	79.06	136.46	258.5	42.69	56.87	119.36	106.38	104.66	53.69	64.98	65.6
mml-miR-433-3p	-0.426518	0.377439	0.295738	0.937178	0.82	1.06	0.19	0.84	0.55	0.76	1.73	0.56	0.75	0.97	1.31	1.71
mml-miR-942-3p	0.299752	2.71346	0.30049	0.937178	6.08	5.04	4.78	4.39	7.19	6.81	7.25	5.6	4.26	7.09	4.19	4.05
mml-miR-664	-0.292255	2.94542	0.300495	0.937178	5.86	7.32	3.61	3.8	7.63	6.49	7.77	7.4	3.59	6.55	9.7	9.36
mml-miR-500a-5p	0.312187	3.81977	0.301659	0.937178	14.37	10.2	6.73	16.73	29.97	10.49	7.95	7.62	10.94	10.52	10.92	10.98
mml-miR-7186-3p	0.363339	6.07421	0.30251	0.937178	66.49	53.33	35.87	36.24	100.86	92.99	66.5	56.72	34.33	85.9	68.04	21.69
mml-miR-374b-5p	0.390463	7.07211	0.302581	0.937178	131.12	99.14	132.37	214.07	82.5	68.98	157.7	112.88	163.29	69.25	68.39	81.89
mml-miR-1-3p	-0.6085	1.23061	0.303836	0.937178	1.75	1.8	3.8	3.89	0.11	0.11	0.86	0.9	4.43	0.75	1.66	1.26
mml-miR-30c-1-3p	-0.260379	5.02134	0.303891	0.937178	25.98	30.58	26.12	19.43	24.33	41.52	18.48	27.13	29.74	36.08	34.76	25.2
mml-miR-493-3p	-0.37345	2.33344	0.305143	0.937178	3.75	4.52	6.53	6	1.22	2.59	2.42	3.47	7.43	3.22	5.59	2.88
mml-miR-142-3p	0.492889	13.7023	0.306884	0.937178	14490.3	9272.48	4511.12	9036.12	19603.1	16009.1	23292	8118.19	6378.69	12118.5	10727.7	9019.26
mml-let-7i-5p	-0.535327	13.5648	0.310651	0.937178	9460.5	10632.1	21077.5	14184.5	1738.72	4783.63	5518.17	13112.9	15865.2	9640.99	6587.88	7953.59
mml-miR-431	-0.25311	4.49986	0.314966	0.937178	18.14	21.45	14.62	26.69	20.46	19.68	9.24	16.48	24.89	18.68	30.74	16.47
mml-miR-320a	-0.25404	11.4475	0.318226	0.937178	2211.11	2685.87	1685.92	2987.8	2733.15	2108.1	1540.57	2213.49	2713.58	1694.19	3581.43	3226.63
mml-miR-1180-3p	-0.299454	8.74941	0.319094	0.937178	328.66	421.35	283.85	448.91	394.48	285.45	230.59	263.87	415.29	319.53	493.05	615
mml-miR-28-3p	0.365576	7.62723	0.32237	0.937178	201.78	148.58	120.38	113.54	170.64	358.22	246.14	106.49	107.33	171.79	186.3	170.98
mml-miR-29c-5p	0.283417	5.93616	0.32281	0.937178	60.57	47.99	24.86	37.59	104.4	63.36	72.63	26.9	32.66	74.09	52.23	54.08
mml-miR-182	0.218013	5.08843	0.328704	0.937178	32.31	27.83	14.91	47.73	23.22	37.41	38.26	14.46	39.17	21.69	37.56	26.28
mml-miR-7180-3p	-0.225755	4.39626	0.330414	0.937178	16.96	20.03	9.16	15.97	20.79	22.38	16.5	11.21	18.04	23.08	25.07	22.77
mml-miR-1306-5p	-0.358549	7.62856	0.330904	0.937178	154.98	190.81	103.62	69.19	180.26	216.36	205.46	175.76	116.6	214.53	192.68	254.49
mml-miR-132-3p	0.311294	3.20043	0.33289	0.937178	8.75	7.12	5.65	11.4	12.61	8.11	5.96	5.27	7.52	4.51	11.44	6.84
mml-miR-340-5p	-0.366927	7.64683	0.333185	0.937178	145.77	213.35	133.25	167.94	81.06	245.55	101.05	258.04	131.8	147.63	453.05	76.22
mml-miR-361-3p	-0.233596	11.5852	0.333678	0.937178	2532.98	2927.39	1547.6	1341.25	2670.56	4033.57	3071.9	2832.13	1914.33	4301.89	3604.75	1983.85
mml-miR-30d-3p	0.244647	3.46446	0.344597	0.937178	9.95	8.59	13.65	9.88	7.3	7.78	11.14	10.76	11.36	7.73	7.51	5.58
mml-miR-627-5p	0.354229	6.4977	0.351406	0.937178	86.64	68.2	116.77	77.8	47.55	110.94	80.15	92.03	62.14	69.9	75.9	41.04
mml-miR-423-5p	-0.251172	11.9427	0.353807	0.937178	3194.7	3754.1	1801.62	2453.31	3925.33	4555.59	3237.63	3329.71	3185.34	2766.61	4930.71	4558.14
mml-miR-424-3p	-0.260041	5.09317	0.357774	0.937178	28.48	30.8	31.78	44.86	25.44	34.71	5.61	31.61	39.84	29.53	38.08	14.94
mml-miR-889-3p	0.336485	1.55609	0.35954	0.937178	2.65	2.15	1.66	3.04	1.55	4.22	2.76	3.7	1.84	1.61	2.27	1.35
mml-let-7f-3p	-0.319951	5.0231	0.361275	0.937178	30.29	28.19	3.8	5.32	47.66	42.49	52.16	17.49	9.77	48.53	38.69	26.46
mml-miR-7165-3p	-0.279867	2.05737	0.363	0.937178	3.23	3.8	0.68	2.37	5.75	3.14	4.23	1.23	2.51	5.05	5.07	5.13
mml-miR-337-3p	-0.288533	2.77876	0.364802	0.937178	5.48	6.34	2.14	3.38	5.86	7.03	8.98	5.49	4.59	9.13	7.16	5.31
mml-miR-10a-5p	0.26232	5.80643	0.368738	0.937178	55.28	44.14	20.18	47.31	61.05	63.14	84.72	31.61	29.9	49.71	60.35	49.14
mml-miR-584-3p	0.214183	4.26284	0.370802	0.937178	18.14	15.64	7.31	18.16	21.01	24.76	19.43	7.85	12.61	18.25	19.13	20.34
mml-miR-485-5p	-0.327336	1.50889	0.375712	0.937178	1.93	2.7	1.85	2.45	1.88	1.84	1.64	2.35	1.5	1.61	5.42	2.61
mml-miR-3140	0.261632	2.15937	0.381822	0.937178	4	3.39	4.29	4.05	3.32	3.68	4.66	2.58	3.76	3.54	3.93	3.15
mml-miR-150-3p	-0.317451	2.14403	0.382879	0.937178	3.42	4.01	2.44	2.53	2.88	7.35	1.9	2.35	4.68	3.11	5.24	4.68
mml-miR-4796-3p	-0.343179	0.522703	0.387542	0.937178	0.93	1.16	1.27	1.52	0.33	0.76	0.78	0.78	1.59	0.86	1.31	1.26
mml-miR-185-3p	-0.243021	4.13637	0.391244	0.937178	13.22	16.92	10.04	16.81	14.27	13.41	11.57	9.19	18.46	12.35	15.63	28.98
mml-miR-324-3p	-0.32905	7.3015	0.392298	0.937178	127.15	152.78	58.29	81.35	188.01	181.32	126.78	98.53	113.93	185.21	181.85	184.39
mml-miR-363-3p	0.203892	4.78283	0.39358	0.937178	25.42	22.52	16.86	19.51	35.61	24.87	30.23	20.4	12.61	22.12	28.21	29.25
mml-miR-6790-3p	-0.202482	4.04694	0.400562	0.937178	13.92	15.19	5.95	7.27	21.34	18.27	16.75	10.54	11.03	22.44	17.99	13.95
mml-let-7i-3p	-0.201715	4.58075	0.406628	0.937178	18.85	22.21	18.62	14.28	21.34	24.11	15.89	31.83	16.54	23.51	19.83	19.35
mml-miR-1249	-0.348104	6.79557	0.410644	0.937178	110.64	90.6	17.25	24.92	418.7	60.44	31.87	32.62	26.31	229.02	106.56	58.49
mml-miR-148b-3p	0.141569	9.49259	0.414428	0.937178	679.7	602.21	470.31	537.28	554.95	1250.56	585.38	461.82	499.57	634.45	892.82	522.4
mml-miR-1255b	0.271448	2.87924	0.414479	0.937178	6.81	5.62	8.29	5.83	3.32	8.65	7.95	4.93	6.35	6.66	6.46	3.69
mml-miR-106b-5p	-0.360388	6.66895	0.414877	0.937178	84.2	86.53	145.72	182.47	27.54	26.81	38.43	92.14	152.6	91.69	41.84	54.35
mml-miR-1255a-5p	0.364073	0.652672	0.417365	0.937178	1.29	1.06	1.56	1.69	0.66	1.41	1.12	0.22	1.59	1.61	0.87	0.99
mml-miR-18b	-0.219132	4.80746	0.419151	0.937178	22.54	25.25	29.73	41.9	13.6	10.7	16.75	25.67	38.51	28.78	21.14	12.15
mml-miR-211	-0.248236	2.59594	0.419448	0.937178	4.95	5.19	3.51	1.27	5.42	2.49	12.09	4.26	2	7.84	4.19	7.65
mml-miR-30e-3p	0.264558	8.32061	0.423445	0.937178	313.59	248.58	191.54	180.78	301.69	361.68	532.26	269.47	207.14	330.38	252.51	183.4
mml-miR-1306-3p	-0.360259	0.690023	0.424456	0.937178	1.06	1.35	1.46	1.77	0.77	0.76	0.52	1.12	0.92	1.07	1.48	2.16
mml-miR-3200-5p	0.261242	2.07016	0.427197	0.937178	3.77	3.21	2.14	4.14	5.09	3.24	4.23	1.79	3.42	2.15	4.28	4.41
mml-miR-450b-5p	0.299559	1.08044	0.429938	0.937178	1.91	1.45	0.68	3.72	2.43	1.95	0.78	1.35	1.59	1.4	2.1	0.81
mml-miR-542-5p	-0.233051	2.07319	0.430828	0.937178	3.15	3.82	4	3.97	3.1	3.14	1.55	4.15	4.84	4.4	4.11	1.62
mml-miR-330-3p	0.251227	1.62617	0.432161	0.937178	2.8	2.32	1.07	1.94	3.21	4.87	2.94	1.57	1.25	2.58	3.32	2.88
mml-miR-937	-0.301526	0.85887	0.432877	0.937178	1.21	1.58	0.39	1.35	1.77	0.97	1.55	0.22	1.09	2.15	1.48	2.97
mml-miR-758-3p	0.280211	1.10701	0.433925	0.937178	1.93	1.54	0.78	0.93	3.87	1.84	2.25	0.67	1.17	2.25	2.45	1.17
mml-miR-145-5p	0.256005	1.80221	0.434258	0.937178	3.03	2.76	2.73	2.62	3.54	3.57	2.68	2.24	3.01	4.83	2.53	1.17
mml-miR-135a-5p	0.30523	1.29662	0.436926	0.937178	2.15	1.75	2.34	2.62	3.65	1.3	0.86	3.25	1.5	1.61	0.7	1.71
mml-miR-6529-3p	-0.188316	4.57431	0.438005	0.937178	19.32	22.41	11.79	10.98	22.34	24.87	26.6	15.92	13.03	37.69	21.92	23.49
mml-miR-543-5p	0.290339	1.04681	0.438079	0.937178	1.85	1.44	0.88	1.69	2.54	2.92	1.21	1.35	1.5	1.5	1.31	1.53
mml-miR-17-5p	-0.248411	8.6226	0.440459	0.937178	323.9	338.37	607.75	551.22	111.7	172.46	176.36	380.22	556.62	347.02	223.86	184.12
mml-miR-382-5p	-0.25808	6.0353	0.441925	0.937178	53	58.8	89.19	79.66	18.58	48.66	28.93	64.57	88.62	40.59	69.09	31.14
mml-miR-942-5p	0.122265	10.9525	0.443889	0.937178	1782.22	1662.69	1299.53	1481.48	2428.69	1522.6	2178.8	1432.32	1211.87	2026.83	1405.09	2237.36
mml-miR-449a-5p	-0.349	1.54896	0.444029	0.937178	2.16	2.4	1.95	6.93	0.44	0	1.47	0.9	7.68	1.72	0.61	1.08
mml-miR-369-3p	-0.302336	0.83799	0.444699	0.937178	1.25	1.45	1.36	3.21	0.33	0.76	0.6	1.91	2.26	1.07	1.57	0.45
mml-miR-15a-5p	-0.21144	11.4903	0.445381	0.937178	2486.18	2327.88	4456.04	5162.58	653.48	909.11	1249.69	2958.91	4169.19	1903.78	1331.46	1276.07
mml-miR-200c-3p	-0.194834	3.64292	0.447947	0.937178	10.14	11	9.16	21.71	3.21	7.57	9.07	9.19	21.3	6.76	7.95	9.81
mml-miR-141-3p	-0.362701	0.522869	0.449674	0.937178	1	1.09	0.49	3.04	0.22	0.76	0.52	0.45	1.25	0.75	2.01	0.99
mml-miR-30a-3p	0.188585	4.81734	0.454052	0.937178	27.45	22.03	13.74	20.95	12.94	37.63	51.99	14.68	26.14	14.92	28.56	25.83
mml-miR-1284	0.270594	1.47964	0.454172	0.937178	2.57	2.01	0.68	1.27	4.76	2.59	3.54	1.35	0.84	1.93	2.88	3.06
mml-miR-370-3p	-0.18904	5.19035	0.459417	0.937178	29.66	32.91	43.96	27.03	14.49	43.14	19.69	38.9	41.76	23.62	39.92	20.34
mml-miR-20a-5p	-0.312095	7.28583	0.460282	0.937178	133.75	128.08	211.13	313.5	39.92	28.98	75.22	164.66	239.55	92.34	66.91	76.94
mml-miR-7204-3p	0.215473	5.94681	0.463471	0.937178	56.97	50.18	57.9	38.52	73.1	51.58	63.74	40.02	33.66	58.41	64.55	54.26
mml-miR-26b-5p	0.21774	11.4538	0.463495	0.937178	2699.04	1959.57	5414.8	4403.47	680.69	1156.6	1839.65	2173.59	3615.91	1616.46	1278.36	1113.55
mml-miR-30b-3p	-0.27806	0.578789	0.466262	0.937619	0.99	1.26	0.88	1.01	0.66	1.62	0.78	0.56	0.92	1.4	2.27	1.17
mml-miR-487b-5p	-0.213013	1.76593	0.470202	0.940404	2.57	3.04	1.85	1.77	2.54	3.14	3.54	2.47	1.75	3.44	3.84	3.69
mml-miR-181b-5p	-0.25226	5.75514	0.473726	0.941096	43.49	49.92	49.22	82.96	31.08	37.09	17.1	35.42	75.92	27.16	61.49	49.59
mml-miR-499-5p	-0.231105	1.81549	0.477992	0.941096	2.66	2.99	4.29	3.63	0.66	2.92	1.81	4.04	4.09	1.61	2.71	2.52
mml-miR-190b	-0.22391	5.24057	0.47822	0.941096	30.98	29.61	92.5	24.67	8.29	11.46	17.96	65.8	23.8	27.49	17.38	13.59
mml-miR-484	-0.319074	13.3621	0.482792	0.94504	8758.05	9937.13	2998.22	6834.39	18487.4	6001.65	9468.57	5482.45	6613.65	9451.8	13285.7	14852
mml-miR-224-5p	0.977713	1.35152	0.48589	0.946072	2.17	1.95	0.29	8.28	1.99	0.22	0.09	0	0.92	0	7.77	1.08
mml-miR-93-3p	-0.121907	10.3681	0.491358	0.947656	1187.81	1158.53	501.9	693.9	2432.56	922.41	1388.31	814.69	836.51	1482.03	1415.4	1244.04
mml-miR-106a-5p	-0.27264	6.30666	0.501331	0.947656	64.57	67.77	127.5	110.83	19.8	28.87	35.84	75.66	118.36	71.08	40.27	33.48
mml-let-7c-5p	-0.287906	7.35	0.501524	0.947656	133.4	145.99	199.34	203.84	38.82	129.32	95.69	133.95	204.05	120.25	153.72	117.98
mml-miR-301a-5p	0.23605	0.688351	0.506732	0.947656	1.35	1.14	0.68	0.84	2.43	1.3	1.47	0.67	0.58	1.72	1.48	1.26
mml-miR-29b-2-5p	-0.16801	4.50595	0.506855	0.947656	18.21	20.26	25.93	24.08	10.4	14.6	16.06	19.39	30.32	17.82	16.42	17.37
mml-miR-128b-3p	0.155316	11.6472	0.506864	0.947656	3059.99	2616.91	1623.63	1363.3	4119.63	4177.27	4016.12	2340.83	1496.78	3929.86	2794.99	2522.09
mml-miR-29a-3p	0.236607	7.92037	0.507141	0.947656	238.02	189.3	173.11	248.53	145.43	452.28	170.74	159.84	240.22	183.39	209.97	153.07
mml-miR-652	-0.234925	8.10235	0.510442	0.947656	221.34	253.54	235.01	352.86	238.43	153.54	126.87	212.53	290	197.02	271.81	296.34
mml-miR-671-3p	-0.239833	7.53997	0.511764	0.947656	151.39	177.47	76.42	107.54	222.84	174.4	175.75	108.06	127.46	204.97	208.49	238.39
mml-miR-342-5p	0.1836	2.5797	0.515278	0.947656	5.56	4.79	2.14	5.66	3.87	11.14	5.01	2.35	4.43	4.19	8.73	4.23
mml-miR-6505-3p	0.194049	1.65279	0.516321	0.947656	2.76	2.4	1.66	1.94	3.32	2.81	4.06	2.13	1.59	2.79	2.79	2.7
mml-miR-30c-5p	0.26664	13.3319	0.519212	0.947656	10126.1	8094.81	5663.36	5405.03	12098	13187.9	14276.1	7679.01	5319.5	11161.8	8886.23	7427.5
mml-miR-382-3p	0.203533	1.40258	0.521625	0.947656	2.3	2.04	1.27	1.61	2.21	3.89	2.5	1.79	1.25	2.04	3.58	1.53
mml-miR-138-5p	-0.198323	3.23431	0.523242	0.947656	7.47	8.45	9.55	13.77	4.64	4.65	4.75	5.49	13.95	5.8	11.09	5.94
mml-miR-301a-3p	-0.211515	4.04728	0.5275	0.947656	13.24	14.58	21.74	22.47	3.98	7.14	10.88	16.48	24.47	14.17	12.49	5.31
mml-miR-636	-0.160513	4.12181	0.528635	0.947656	14.55	15.64	8.38	9.29	26.65	12	16.41	10.87	11.19	16.43	17.03	22.68
mml-miR-20a-3p	-0.251841	2.68898	0.530481	0.947656	4.96	5.88	3.61	9.8	4.42	1.62	5.35	8.86	7.85	3.44	6.81	2.43
mml-miR-210-5p	-0.213924	1.24075	0.535412	0.948477	1.8	2.01	0.97	1.35	3.54	1.51	1.64	1.46	2	2.25	2.71	1.62
mml-miR-543-3p	0.180279	3.09248	0.536096	0.948477	7.8	7.02	4.58	8.36	10.51	10.27	5.27	4.71	5.18	6.33	12.05	6.84
mml-miR-155	0.177529	8.36746	0.541599	0.953629	307.41	257.33	375.76	409.63	108.71	255.17	387.78	275.19	324.83	156.76	255.65	274.2
mml-miR-26a-1-3p	0.205364	2.39686	0.547246	0.956373	4.87	4	2.44	2.37	5.97	4.87	8.72	4.82	2.84	5.48	2.71	4.14
mml-miR-210-3p	-0.129494	9.30732	0.548355	0.956373	515.87	563.1	853.29	678.86	322.93	439.2	285.09	630.97	820.14	628.97	477.33	258.09
mml-miR-491-3p	-0.186022	3.43049	0.553108	0.958022	8.81	10.05	4.29	4.31	9.07	12.76	13.65	10.2	4.59	16.64	12.32	6.48
mml-miR-154-5p	0.150771	5.43833	0.557047	0.958022	41.6	35.38	15.99	23.23	64.7	53.31	50.78	22.64	25.22	55.4	38.61	35.01
mml-miR-450a-2-3p	-0.241852	0.458827	0.557111	0.958022	0.91	1.14	1.07	0.84	1.22	1.08	0.35	1.12	1.59	1.93	0.61	0.45
mml-miR-502-3p	0.135283	4.7387	0.570202	0.96517	24.81	22.39	13.84	25.85	37.05	29.95	17.36	14.91	20.05	24.16	32.93	19.89
mml-miR-93-5p	-0.406784	15.5359	0.576875	0.96517	36342.6	43394	71921.3	51355.7	10808.4	21651.6	25975.8	49775.4	72264	41911.1	28332.5	24687.1
mml-miR-423-3p	-0.189982	12.4052	0.577308	0.96517	4557.12	5023.38	2010.02	3832.23	8936.55	4128.5	3878.28	2773.06	3669.04	4708.4	6039.1	7927.31
mml-miR-149-5p	-0.248538	2.45851	0.581681	0.96517	3.02	5.65	5.36	1.18	0.88	1.3	6.39	3.36	0.5	1.5	1.75	21.15
mml-miR-30a-5p	0.225185	7.0788	0.583094	0.96517	145.56	96.9	24.08	73.75	64.03	230.85	335.09	42.6	81.52	55.4	142.63	162.34
mml-miR-181d	-0.221679	0.967365	0.583347	0.96517	1.43	1.55	1.27	3.97	0.55	0.76	0.6	0.9	2.92	0.75	2.36	0.81
mml-miR-128a-3p	0.138427	11.8534	0.584034	0.96517	3516.89	3043.36	1877.26	1603.38	4632.67	5024.31	4446.82	2665.78	1801.4	4483.24	3425.52	2840.84
mml-miR-133d-3p	-0.205434	4.24594	0.593848	0.96517	16.1	16.46	9.65	6.76	41.36	9.51	13.21	14.35	25.81	16.96	6.64	18.54
mml-miR-15a-3p	-0.208106	2.04898	0.59456	0.96517	3.26	3.71	1.27	2.53	5.97	2.81	3.71	5.38	3.34	4.19	3.93	1.71
mml-miR-21-3p	-0.185772	0.974116	0.595842	0.96517	1.41	1.68	1.36	1.61	1.99	0.97	1.12	1.46	1.42	2.25	2.36	0.9
mml-miR-221-5p	0.143135	3.28272	0.598555	0.96517	8.68	7.97	5.75	14.11	8.4	6.49	8.64	6.84	11.78	4.62	9.87	6.75
mml-miR-32-5p	-0.158713	4.07785	0.599268	0.96517	13.37	15.06	16.08	21.88	6.64	5.84	16.41	29.93	13.45	8.27	14.76	8.91
mml-miR-6505-5p	0.20028	0.415187	0.608524	0.96517	1.05	0.95	0.78	0.59	1.66	1.19	1.04	1.01	0.58	1.5	1.22	0.45
mml-miR-1304	0.145282	5.70216	0.6088	0.96517	47.3	39.76	75.35	68.68	14.05	24.87	53.55	52.24	63.48	19.97	28.04	35.1
mml-miR-377-3p	0.188278	1.77334	0.608915	0.96517	3.09	2.62	0.88	3.63	4.64	3.35	2.94	2.58	1.67	2.47	3.93	2.43
mml-miR-138-3p	-0.138855	3.165	0.611894	0.96517	7.5	8.06	5.95	3.8	6.64	14.27	6.82	8.74	5.6	6.98	12.84	6.12
mml-miR-26b-3p	0.145746	5.80557	0.616962	0.96517	49.7	47.67	36.65	33.79	59.06	59.25	59.76	32.06	27.23	71.29	40.27	67.49
mml-miR-188-5p	0.160195	1.34815	0.617397	0.96517	2.2	1.98	0.78	1.61	4.09	2.38	2.16	1.12	1.17	3.54	2.45	1.62
mml-miR-185-5p	0.114349	11.84	0.623077	0.96517	3290.45	3109.83	2950.94	3550.42	3003.99	3442.56	3504.32	2389.48	3549.18	3059.19	3429.98	3121.34
mml-let-7d	-0.140893	11.7926	0.626678	0.96517	3027.65	3000.48	4492.11	5272.23	1197.59	2111.66	2064.63	2662.42	4133.27	2319.84	2552.17	3334.71
mml-miR-151-5p	0.16681	6.36812	0.627521	0.96517	76.52	68.41	57.61	55.92	82.28	94.82	91.98	53.13	62.98	79.78	79.83	66.32
mml-miR-660-3p	0.144709	1.82444	0.629353	0.96517	3.15	2.77	1.36	2.28	5.86	2.59	3.63	1.68	1.92	4.29	3.06	2.88
mml-miR-130b-3p	0.128193	5.22554	0.630132	0.96517	32.72	29.47	63.26	35.31	14.6	24.76	25.65	43.27	44.77	22.23	20.18	16.92
mml-miR-204-5p	0.119217	3.24572	0.63518	0.96517	8.29	7.6	7.51	5.24	6.08	6.05	16.58	9.19	4.26	5.58	6.11	12.87
mml-miR-15b-3p	-0.116638	11.1259	0.637533	0.96517	2042.69	1937.45	704.16	723.13	3158.26	2607.85	3020.08	1948.39	1039.64	2720.76	2294.42	1684
mml-miR-20b-5p	-0.135352	4.89917	0.642071	0.96517	24.46	25.97	40.74	30.5	11.06	16.87	23.15	28.36	35.5	28.35	22.45	15.21
mml-miR-191-3p	-0.156172	6.33479	0.643118	0.96517	67.38	76.12	40.26	46.29	81.73	94.72	73.93	42.48	64.4	103.4	99.31	71
mml-miR-7194-3p	-0.15417	2.09835	0.644193	0.96517	3.59	3.72	1.17	1.61	3.87	6.92	4.4	1.79	3.01	5.48	5.15	3.15
mml-miR-26a-2-3p	0.140178	3.53857	0.644738	0.96517	10.64	9.29	6.14	5.49	8.63	11.35	21.59	13.9	4.34	10.09	8.73	9.36
mml-miR-196b-5p	-0.138427	4.16045	0.647694	0.96517	15.12	14.92	20.18	31.09	2.76	8.11	13.47	14.24	31.07	9.66	8.91	10.71
mml-miR-335-3p	-0.127922	3.93161	0.649054	0.96517	13	13.66	4.48	12.84	16.81	11.35	19.52	11.88	7.77	14.71	17.73	16.2
mml-miR-103-3p	-0.163429	12.9183	0.653787	0.96517	6400.21	6962.76	8159.88	11105.5	3102.97	5153.41	4479.29	5957.49	11653.3	4841	7418.95	4943.03
mml-miR-7194-5p	0.170959	0.622692	0.655808	0.96517	1.27	1.1	0.29	0.76	1.44	2.49	1.38	0.9	0.67	0.86	2.1	0.99
mml-miR-3122	-0.106482	3.89953	0.657971	0.96517	12.14	13.49	11.79	11.66	14.6	12.22	10.45	11.43	18.96	14.07	12.75	10.26
mml-miR-1262-3p	0.177141	3.90494	0.658013	0.96517	13.16	11.26	29.44	5.91	2.21	13.41	14.85	9.86	3.01	6.01	10.31	27.09
mml-miR-205	-0.208117	1.65549	0.658764	0.96517	2.39	2.83	0.68	3.21	1.66	5.19	1.21	0.67	1.17	3.01	4.45	4.86
mml-miR-376c-3p	0.138164	3.22887	0.667834	0.96517	8.79	7.67	3.12	9.71	13.82	12.11	5.18	7.4	7.1	6.44	13.1	4.32
mml-miR-122a-5p	0.394967	7.11434	0.670936	0.96517	160.33	57.12	576.66	140.49	52.97	21.52	10.02	13.9	75.92	20.83	142.81	32.13
mml-miR-148a-5p	0.153476	3.00751	0.671118	0.96517	7.24	6.53	2.14	7.6	11.83	5.19	9.41	3.03	4.51	3.97	8.56	12.6
mml-let-7g-3p	-0.138331	1.7541	0.677032	0.96517	2.67	2.94	1.46	1.86	4.09	3.35	2.59	3.7	2.67	3.65	2.97	1.71
mml-miR-362-3p	0.171186	0.275806	0.677665	0.96517	0.94	0.85	0.49	0.59	1.55	1.3	0.78	0.9	0.33	1.07	1.22	0.72
mml-miR-375	0.154848	1.59649	0.679264	0.96517	2.52	2.33	2.14	5.49	1.66	2.38	0.95	0.9	4.76	0.97	3.23	1.8
mml-miR-654-3p	0.149166	7.84237	0.680179	0.96517	225.54	186.62	69.99	133.47	324.92	311.4	287.94	134.74	131.39	256.19	255.48	155.32
mml-miR-4766-5p	0.133817	2.363	0.680212	0.96517	4.43	4.05	7.41	4.05	2.54	3.89	4.23	4.82	4.76	4.08	4.54	2.07
mml-miR-181a-3p	-0.0962392	3.79804	0.680635	0.96517	11.96	12.68	5.46	8.36	13.16	21.52	11.31	8.41	9.02	11.06	23.15	11.79
mml-miR-329-3p	0.124745	2.84963	0.684776	0.96517	6.29	6.19	3.8	5.24	8.52	8.43	5.44	6.73	2.26	7.84	9.43	4.68
mml-miR-27a-3p	0.140292	6.35072	0.685293	0.96517	76.66	67.92	41.13	66.82	81.95	117.31	76.09	57.28	58.89	82.57	81.67	59.21
mml-miR-1235	0.155138	2.47986	0.689042	0.96517	5.09	4.6	2.92	1.1	6.3	12.54	2.59	1.79	0.67	7.62	6.99	5.94
mml-miR-323b-3p	-0.127962	6.16923	0.691497	0.96517	60.94	66.28	41.91	30.33	63.37	90.5	78.59	72.3	38.34	61.42	104.55	54.8
mml-miR-409-5p	0.0998779	3.66095	0.695059	0.96517	11.59	10.73	5.75	9.04	16.59	17.95	8.64	9.19	8.69	9.99	18.69	7.11
mml-miR-4677-3p	0.132529	1.72296	0.698112	0.96517	2.97	2.54	1.56	0.76	3.65	4.54	4.32	2.35	1.25	3.97	2.88	2.25
mml-miR-27a-5p	-0.15511	0.82072	0.700636	0.96517	1.34	1.33	1.46	3.13	1	0.86	0.26	1.12	2	1.4	1.05	1.08
mml-miR-339-3p	-0.0804625	9.30414	0.700828	0.96517	556.35	562.33	374.69	333.6	939.58	792.12	341.74	652.49	384.13	595.05	798.06	381.92
mml-miR-502-5p	0.140971	1.33282	0.702895	0.96517	2.23	1.83	0.78	2.37	4.53	1.41	2.07	1.35	2.09	1.72	1.83	2.16
mml-miR-187-5p	-0.0923157	5.45213	0.708707	0.965959	37.36	39.8	39.28	7.52	44.9	73.52	21.59	50.33	8.77	52.29	66.82	20.79
mml-miR-125b-5p	0.0852963	9.10557	0.710676	0.965959	515	470.99	388.05	244.39	258.89	1074.65	609.04	493.99	335.02	283.89	953.53	288.51
mml-miR-339-5p	-0.176888	13.9968	0.716646	0.965959	13460.2	15465.9	10058.7	7608.79	18095.8	19873	11664.7	15975.5	8813.55	22551.8	19655.9	10332.4
mml-miR-107-3p	-0.104344	8.28209	0.718858	0.965959	259.3	281.94	297.78	414.62	159.58	257.66	166.86	252.32	440.18	190.37	346.84	179.98
mml-miR-95-3p	-0.175099	1.12819	0.721264	0.965959	1.56	1.76	1.95	4.65	0.33	0.86	0	0.78	6.01	1.18	0.44	0.36
mml-miR-605	-0.164015	0.576799	0.722923	0.965959	0.97	1.25	0.97	1.18	1	0.76	0.95	0.22	0.67	1.29	2.27	1.8
mml-miR-6827-5p	-0.143051	0.518467	0.731013	0.965959	1.01	1.1	1.46	1.18	0.55	1.41	0.43	0.67	1.84	0.86	1.22	0.9
mml-miR-18a-3p	-0.0971363	9.13286	0.732088	0.965959	490.4	498.04	186.47	401.01	1071.41	315.61	477.51	255.46	286.16	490.04	556.9	901.62
mml-miR-671-5p	0.0939067	4.58604	0.733258	0.965959	22.58	19.97	7.99	21.37	37.49	20.76	25.3	14.46	19.29	18.68	30.22	17.19
mml-miR-486-5p	-0.290043	17.0234	0.73457	0.965959	106090	127363	63454.7	65112.6	178226	98783.9	124872	101695	75838.7	162096	126357	170829
mml-miR-668	-0.137789	0.297643	0.73554	0.965959	0.86	0.93	0.29	1.1	1.22	1.08	0.6	0.56	0.92	0.97	1.31	0.9
mml-miR-454-3p	-0.101586	9.12308	0.736264	0.965959	483.38	451.9	852.8	783.53	114.68	208.68	457.21	571.56	764.43	377.62	300.29	245.59
mml-miR-92b-3p	-0.129767	7.40999	0.737593	0.965959	139.16	157.2	32.65	94.78	183.25	93.96	291.13	55.37	67.91	144.95	123.07	394.7
mml-miR-369-5p	0.0744146	3.8984	0.755967	0.980628	13.26	12.5	10.82	16.73	7.74	17.3	13.73	11.99	14.12	11.81	14.67	9.9
mml-miR-532-5p	0.118677	7.19416	0.757649	0.980628	131.72	124.04	138.8	96.05	122.65	195.81	105.28	135.97	125.37	132.92	157.74	68.21
mml-miR-500b-3p	0.147835	0.593239	0.758187	0.980628	1.25	1.07	0.49	0.84	1.66	2.49	0.78	0.9	0.84	1.93	0.44	1.26
mml-miR-140-3p	0.116255	13.1317	0.768071	0.980628	8467.59	7403.84	4565.9	4325.33	11307	12019.1	10120.7	7762.86	4920.84	8998.27	8643.5	6693.72
mml-miR-372-3p	0.109389	1.76496	0.778914	0.980628	2.85	2.6	8.38	1.35	1.22	3.03	0.26	6.61	0.42	1.29	3.76	0.9
mml-miR-340-3p	0.108883	6.59891	0.780861	0.980628	87.21	82.78	67.16	56.77	70.89	127.05	114.17	94.83	43.02	113.81	96.08	66.14
mml-miR-1255a-3p	-0.09193	3.14307	0.785461	0.980628	7.76	7.44	3.41	3.55	6.86	10.81	14.16	8.97	5.1	8.7	7.25	7.2
mml-miR-196a-5p	-0.111518	7.72224	0.789608	0.980628	186.89	173.73	276.83	348.89	35.17	143.91	129.63	157.94	313.22	113.28	171.72	112.49
mml-let-7a-5p	-0.179022	15.1511	0.791278	0.980628	30631.6	30545.4	54903.8	46165.4	8112.31	20676.2	23300	33958.4	47993	26381.2	21462.4	22932.1
mml-miR-96	-0.100715	1.19618	0.791487	0.980628	1.84	1.77	0.39	4.56	1.44	1.84	0.95	0.67	2.92	1.07	2.18	1.98
mml-miR-134-5p	-0.0635003	5.1323	0.792884	0.980628	29.33	30.76	40.26	29.57	20.68	34.71	21.42	33.07	38.76	27.27	33.28	21.42
mml-miR-7	-0.0756424	11.2498	0.794005	0.980628	2128.39	2032.67	3286.25	3101.42	410.07	1973.05	1871.17	2588.66	2758.02	1470.01	2369.54	977.12
mml-miR-500a-3p	-0.0580992	4.74203	0.798385	0.980628	23.05	23.97	16.28	22.98	22.12	35.57	18.31	18.38	25.89	26.09	30.4	19.08
mml-miR-486-3p	0.113532	1.37738	0.806412	0.980628	2.19	2.05	1.36	2.37	4.64	1.19	1.38	1.57	1.34	1.29	4.54	1.53
mml-miR-424-5p	-0.0869546	6.42291	0.810513	0.980628	71.45	75.21	100.69	122.24	50.43	70.61	13.3	117.36	98.89	78.49	67.17	14.13
mml-miR-376b-5p	0.0844752	1.0091	0.812871	0.980628	1.65	1.57	0.88	0.76	2.54	2.27	1.81	1.35	1.09	2.79	1.75	0.9
mml-miR-551a	0.0854092	1.21439	0.815793	0.980628	2.01	1.78	0.29	0.93	0.77	5.73	2.33	0.34	1.09	0.75	4.45	2.25
mml-miR-186-3p	0.125502	0.374878	0.819752	0.980628	0.97	0.93	0.68	0.59	1.33	0.54	1.73	1.23	0.92	0.86	1.57	0.09
mml-miR-7172-3p	0.0860802	0.803559	0.825276	0.980628	1.47	1.25	0.58	0.34	1.44	3.03	1.99	0.9	0.84	1.07	1.83	1.62
mml-miR-1262-5p	0.0768967	1.62055	0.82674	0.980628	2.45	2.48	2.34	1.1	1	2.38	5.44	3.25	0.25	1.61	2.62	4.68
mml-miR-15b-5p	0.105085	13.817	0.835239	0.980628	13319.8	10966.1	24278.5	18175.1	5014.65	12666.1	6464.81	12079.5	16040.3	8625.48	9791.37	8293.94
mml-miR-331-3p	-0.0410212	11.3586	0.836022	0.980628	2265.59	2337.16	1423.03	1188.68	2869.51	2713.27	3133.48	1820.16	1332.82	3542.57	2005.06	2985.18
mml-miR-125a-5p	-0.0511539	8.67953	0.839181	0.980628	368.41	362.2	256.26	169.38	221.62	739.89	454.88	365.65	204.47	265.96	648.7	326.22
mml-miR-199a-5p	0.055121	3.78852	0.84265	0.980628	13.14	11.02	3.9	3.89	11.72	18.92	27.29	7.51	4.09	14.82	12.4	16.29
mml-miR-491-5p	-0.0778854	7.42603	0.847281	0.980628	156.49	150.63	61.9	117.34	318.06	158.19	126.96	95.17	126.63	147.1	225.35	158.92
mml-miR-25	0.137749	16.1305	0.854454	0.980628	64286.9	59421.8	71835.7	48305.2	66328.2	67786.6	67178.7	62291.2	63792.9	69975.2	50913.8	50136.1
mml-miR-98	0.0808263	6.73177	0.855958	0.980628	101.38	78.02	150.01	208.49	23.89	40.11	84.38	82.28	129.8	64.42	55.29	58.31
mml-miR-22	0.0322149	10.561	0.863645	0.980628	1344.21	1301.41	852.22	2058.12	1845.55	1041.13	924.01	833.97	1950.41	1115.36	1169	1438.33
mml-let-7a-3p	-0.0738919	6.41276	0.864279	0.980628	81.92	71.46	19.4	18.92	97.43	124.45	149.41	60.19	24.31	115.53	102.02	55.25
mml-miR-30d-5p	0.0641551	13.0038	0.864594	0.980628	7617.75	6933	3528.87	4747.97	9802.03	10571.6	9438.25	6499.8	4566.85	7959.14	8168.88	7470.34
mml-miR-425	0.0907512	14.1462	0.864773	0.980628	16974.9	14983.3	8262.03	13550.1	30847.4	12801.7	19413.3	12433.1	10736.4	13852.8	18555.7	19338.6
mml-miR-598-3p	-0.0585641	1.77456	0.868153	0.980628	2.67	2.97	3.31	2.2	1.66	3.24	2.94	2.69	1.92	4.62	3.93	1.71
mml-miR-148a-3p	0.0317041	9.82659	0.871356	0.980628	808.6	807.4	568.47	630.79	513.92	1071.83	1257.98	831.17	672.38	557.68	1456.89	518.89
mml-miR-140-5p	-0.0605578	6.47111	0.873064	0.980628	72.75	80.34	75.84	96.64	55.85	61.31	74.1	93.93	108	96.74	62.36	40.68
mml-miR-505-3p	-0.0553276	6.02707	0.877723	0.980628	54.48	59.37	57.12	39.37	53.86	83.04	39.04	33.96	35.16	80.1	72.15	75.5
mml-miR-191-5p	0.117503	16.4709	0.882196	0.980628	83484.1	75673.3	62841.4	50827.3	82197.9	122060	99493.9	88080.2	58985.8	66859.3	92406.5	72034.5
mml-miR-19a-3p	0.0609069	7.51765	0.883033	0.980628	159.09	159.7	156.54	171.15	100.97	145.1	221.7	221.38	161.87	139.9	205.78	69.56
mml-miR-411-5p	0.0486078	1.25455	0.883274	0.980628	1.88	1.86	2.34	3.29	1	1.3	1.47	2.58	2.84	1.5	1.57	0.81
mml-miR-487b-3p	0.0359152	3.63034	0.883416	0.980628	10.65	10.93	7.6	10.48	10.4	14.16	10.62	11.88	8.77	9.45	17.73	6.84
mml-miR-590-3p	0.0612987	2.74783	0.884279	0.980628	6.04	4.86	11.5	11.07	0.77	1.95	4.92	7.73	7.85	3.87	2.97	1.89
mml-miR-503-3p	-0.0391633	5.7603	0.886243	0.980628	45.94	48.01	53.32	52.04	52.64	52.33	19.35	50.44	63.23	54.76	50.75	20.88
mml-miR-378a	-0.0551319	7.23564	0.889751	0.980628	130.02	133.53	95.33	260.02	108.38	82.28	104.07	107.16	211.99	70.54	158.62	119.33
mml-miR-542-3p	0.049326	1.71055	0.890046	0.980628	2.73	2.55	4.19	5.15	1	2.38	0.95	3.81	2.76	2.25	3.23	0.72
mml-miR-130a-3p	0.0348339	3.99117	0.891638	0.980628	13.66	12.65	27.49	18.33	5.64	8.11	8.72	17.26	20.88	7.95	10.31	6.84
mml-miR-126	-0.0372552	10.479	0.891873	0.980628	1315.61	1032.66	3002.7	2149.95	193.87	510.56	720.97	1605.28	1648.46	600.41	870.55	438.62
mml-miR-330-5p	-0.0357144	3.02023	0.89549	0.980628	6.94	7.01	3.22	3.97	9.84	7.46	10.19	5.16	4.01	10.84	6.2	8.82
mml-miR-451	0.0877016	15.3109	0.896726	0.980628	37166.1	34543.4	16874.2	44390.8	45887.9	39965.7	38711.6	33808	23301.3	29121	42741.8	43745.3
mml-miR-660-5p	0.035044	5.69798	0.896815	0.980628	45.02	45.55	39.87	50.86	37.71	51.68	45	51.34	45.35	48.21	55.2	27.63
mml-miR-7186-5p	0.0387378	5.82798	0.897272	0.980628	50.75	47.26	57.41	83.72	38.82	50.39	23.4	48.31	60.39	37.36	53.8	36.45
mml-miR-6529-5p	0.0390059	8.03416	0.903549	0.980628	239.09	227.17	116.19	138.12	339.29	302.1	299.77	159.17	142.75	221.08	337.32	275.55
mml-miR-7180-5p	-0.0503654	6.46571	0.904245	0.980628	82.2	74.44	19.79	54.4	192.32	53.2	91.29	30.6	45.27	74.3	91.71	130.31
mml-miR-7172-5p	-0.0377359	1.96787	0.904724	0.980628	3.32	3.23	1.17	1.69	6.52	2.81	4.4	1.57	1.84	4.19	3.49	5.04
mml-miR-181c-3p	-0.0375702	1.82805	0.904859	0.980628	3.02	2.95	0.58	3.97	3.65	4.54	2.33	1.46	3.17	3.76	4.11	2.25
mml-miR-215-5p	0.0457093	0.494573	0.906438	0.980628	1.06	1.04	0.1	1.35	1.11	1.3	1.47	0.22	0.84	1.29	1.66	1.17
mml-miR-3200-3p	-0.0420135	7.50854	0.908539	0.980628	157.59	163.78	90.55	103.48	213.11	195.81	184.99	95.95	120.61	236.21	167.18	198.97
mml-miR-99b-5p	-0.0342816	5.90369	0.909049	0.980628	55.74	51.29	32.95	21.71	30.41	125.86	67.8	46.97	30.32	35.11	96.34	47.7
mml-miR-92a-3p	-0.0890355	16.7522	0.915001	0.980628	92287.9	100123	64742.9	91127.4	127071	82192.4	96306.1	84759.9	79854.4	82015.3	108830	145157
mml-miR-199a-3p	0.048555	5.57126	0.916975	0.980628	43.79	38.82	58.78	100.78	16.92	16.76	25.74	19.84	39.84	19.43	80.36	34.65
mml-miR-409-3p	-0.0195438	9.71596	0.918428	0.980628	753.37	740.56	487.96	408.19	705.46	1271.54	893.7	784.54	567.47	792.39	1064.98	493.42
mml-miR-1271-5p	0.0395149	6.85888	0.918677	0.980628	109.5	95.76	45.23	131.02	247.61	60.66	62.96	65.46	131.14	155.04	71.27	55.88
mml-let-7f-5p	0.048827	13.3447	0.921995	0.980628	9666.12	7682.92	17644.9	16456	1536.11	4106.55	8586.96	9660.92	13379.4	6121.82	4547.45	4705
mml-miR-378d	0.0265587	4.59062	0.922873	0.980628	20.71	20.53	22.32	35.9	18.36	12.11	14.85	23.32	28.9	9.66	24.37	16.38
mml-miR-550-5p	-0.0333306	0.765296	0.92397	0.980628	1.27	1.33	1.17	1.52	1.11	1.51	1.04	1.01	1.17	1.18	1.83	1.44
mml-miR-7189-3p	0.0373171	1.26102	0.924442	0.980628	1.92	1.83	2.24	1.94	0.44	2.7	2.25	1.23	1.75	1.29	1.66	3.24
mml-miR-34a-5p	-0.0472633	7.06943	0.925716	0.980628	124.87	96.36	286.18	197.25	34.5	57.95	48.45	72.08	168.64	64.74	72.32	104.03
mml-miR-1296-5p	-0.0369891	7.02427	0.926303	0.980628	113	119	36.07	84.31	198.07	140.24	106.31	33.4	86.78	153.54	138.96	182.32
mml-miR-503-5p	-0.0357518	7.29792	0.927333	0.980628	132.64	138.28	176.43	209.25	102.85	142.62	32.04	151.55	233.45	164.6	107.69	34.11
mml-miR-324-5p	0.031151	7.57403	0.934265	0.985127	174.81	160.73	103.32	80.68	207.8	231.71	250.54	151.55	113.85	199.82	176.17	162.25
mml-miR-371-5p	0.0289673	0.708032	0.938229	0.986481	1.19	1.33	1.85	0.51	0.55	2.27	0.78	2.58	0.58	0.21	2.71	0.54
mml-miR-373	0.0285235	1.69886	0.943065	0.98874	2.68	2.47	9.36	0.42	0.33	2.92	0.35	7.4	0.25	0.86	3.49	0.36
mml-miR-223	0.0395714	15.1264	0.949214	0.991313	31619.7	30906.6	27583.3	20516.4	29134.3	45335.5	35528.9	30407.1	19563.7	34782.4	36202.8	33577.2
mml-miR-505-5p	-0.0168668	2.72648	0.952302	0.991313	5.7	5.65	4.48	4.39	4.98	10.49	4.15	5.49	4.43	5.37	8.21	4.77
mml-miR-576-5p	-0.0164379	5.52514	0.955447	0.991313	42.47	39	13.16	23.15	44.79	43.79	87.49	31.95	17.29	43.91	51.53	50.31
mml-miR-17-3p	-0.0172535	2.7867	0.956898	0.991313	5.87	5.81	5.26	8.62	7.74	4.54	3.2	6.17	5.93	4.29	7.51	5.13
mml-miR-323a-3p	0.0117853	5.10846	0.958988	0.991313	30.51	30.31	18.81	20.61	31.63	44.87	36.62	27.8	19.38	28.45	45.42	30.51
mml-miR-331-5p	-0.0123492	5.63024	0.963152	0.992829	41.81	42.46	51.47	49.33	44.24	30.92	33.08	51	46.94	37.47	34.06	42.84
mml-miR-16-5p	-0.0373653	17.3077	0.967827	0.99303	140626	130785	252347	224927	35897.5	76831.2	113126	177001	220349	104843	78221.3	73510
mml-miR-150-5p	-0.0216705	14.4569	0.968957	0.99303	20210.1	19536.5	14488.3	14933.4	15804.4	37934.3	17890.1	14887.9	18889.2	19491.1	23956.9	20457.6
mml-miR-374a-3p	-0.0153953	1.20963	0.971954	0.99303	1.82	1.85	1.56	0.84	0.77	1.95	3.97	3.47	1.42	0.64	2.79	0.9
mml-miR-379-5p	0.00930928	3.88789	0.974141	0.99303	12.75	12.01	20.27	23.15	4.31	7.03	8.98	13.45	22.47	9.56	8.82	5.76
mml-miR-933	-0.00953662	0.875967	0.9795	0.995735	1.45	1.35	0.1	1.69	2.1	0.32	3.02	0.34	1.25	2.04	0.44	2.7
mml-miR-190a-5p	0.00693375	6.37128	0.986788	0.996599	68.38	76.36	129.06	20.53	3.32	138.4	50.61	114.89	11.61	7.95	215.74	31.59
mml-miR-5697-3p	-0.00472476	1.66901	0.98815	0.996599	2.58	2.58	2.34	1.86	3.1	1.62	3.97	3.59	2.51	3.01	1.75	2.07
mml-miR-222-3p	-0.00481377	8.02522	0.988474	0.996599	222.92	219.11	321.18	306.23	200.72	151.05	135.42	249.85	294.18	162.99	183.07	205.45
mml-let-7g-5p	0.00238747	12.7972	0.995566	0.998723	6499.34	5191.21	14569.6	10276.5	1283.3	2661.91	3705.38	7330.52	8598.56	4289.44	2766.95	2970.61
mml-miR-299-5p	0.00173904	6.38703	0.996118	0.998723	75.85	73.54	33.53	55.84	92.79	116.77	80.32	57.17	50.45	78.06	110.66	71.36
mml-miR-299-3p	-0.000694036	2.09366	0.998723	0.998723	3.4	3.59	4.87	4.48	1.77	3.57	2.33	4.26	5.68	3.97	2.71	1.35

## Sheet: H. DE_smallRNA_Grp2_Grp1
DE_smallRNA_Group2_vs_Group1_1
names	logFC	logCPM	PValue	FDR	Group2	Group1	Group1:2	Group2:4	Group2:7	Group1:10	Group2:13	Group1:18	Group2:19	Group2:27	Group1:30
ENSMMUG00000036436	0.660607	14.1639	0.0136203	1	21872	13841.3	14943.7	28529.2	26698.5	10855.9	20832.4	17622.7	19974.7	13325.3	11942.9
ENSMMUG00000026536	-0.698475	9.70693	0.0173222	1	600.41	975.03	788.11	715.79	701.91	1187.36	373.68	878.82	461.7	748.96	1045.85
ENSMMUG00000026130	0.832791	9.92602	0.0175577	1	1103.03	622.09	727.48	664.66	1351.82	593.68	747.35	323.78	1409.4	1341.89	843.43
ENSMMUG00000026512	-2.581	6.58612	0.040685	1	4.86	66.2	30.31	0	0	28.27	0	138.76	24.3	0	67.47
ENSMMUG00000028097	-1.90483	6.64018	0.0415621	1	10.06	67.57	30.31	0	26	0	0	138.76	24.3	0	101.21
ENSMMUG00000027821	-0.802553	8.87753	0.049838	1	311.04	540.26	606.24	357.89	285.96	452.33	373.68	832.57	194.4	343.27	269.9
ENSMMUG00000034195	-1.89866	6.85208	0.0553075	1	24.43	94.18	60.62	51.13	0	84.81	46.71	231.27	24.3	0	0
ENSMMUG00000025577	-0.777711	8.48922	0.0591813	1	218.6	380.24	454.68	255.64	181.98	282.7	93.42	277.52	218.7	343.27	506.06
ENSMMUG00000024424	0.540719	10.8405	0.063148	1	2036.12	1406.23	1273.09	1584.95	2599.66	1554.88	1915.09	1110.09	2770.21	1310.69	1686.86
ENSMMUG00000026293	-1.61876	6.7437	0.0631953	1	16.3	76.91	60.62	0	26	28.27	0	185.01	24.3	31.21	33.74
ENSMMUG00000037345	0.529794	10.317	0.0671612	1	1386.02	964.82	1121.54	1073.68	2157.72	1074.28	1214.45	786.31	1360.8	1123.44	877.17
ENSMMUG00000024902	0.419584	11.4831	0.0765889	1	3154.24	2348.62	3334.29	3374.42	3691.51	1865.85	3129.53	2035.16	3110.41	2465.34	2159.18
ENSMMUG00000027657	-1.73654	6.78231	0.0793729	1	17.68	73.23	60.62	0	26	84.81	0	46.25	0	62.41	101.21
ENSMMUG00000036757	0.84218	8.91194	0.0805095	1	552.76	292.3	394.05	1124.81	207.97	282.7	653.93	323.78	340.2	436.9	168.69
ENSMMUG00000025282	-3.22155	6.35005	0.0856452	1	0	43.12	0	0	0	0	0	138.76	0	0	33.74
ENSMMUG00000025523	0.560742	12.6241	0.0909502	1	7322.45	4957.59	3546.48	10378.9	3353.56	4777.71	8454.41	6614.28	6779.72	7645.67	4891.88
ENSMMUG00000024990	2.16945	6.62562	0.0950668	1	50.45	8.43	0	51.13	26	0	46.71	0	97.2	31.21	33.74
ENSMMUG00000027952	1.75824	7.04036	0.095708	1	111.03	31.56	0	153.38	26	0	233.55	92.51	48.6	93.62	33.74
ENSMMUG00000035403	-0.299641	12.9011	0.0960721	1	6883.86	8472.14	8305.42	7669.14	8084.93	8170.17	6866.29	9990.81	5370.32	6428.6	7422.17
ENSMMUG00000024536	-0.809455	8.1187	0.104513	1	148.53	275.23	333.43	51.13	285.96	367.52	186.84	231.27	218.7	0	168.69
ENSMMUG00000024450	0.630147	9.20064	0.106895	1	622.05	407.5	515.3	409.02	701.91	310.98	934.19	601.3	534.6	530.52	202.42
ENSMMUG00000025719	0.675159	9.86097	0.108053	1	1023.09	646.65	363.74	613.53	597.92	621.95	1027.61	555.04	1628.1	1248.27	1045.85
ENSMMUG00000024262	-1.13992	7.40277	0.111525	1	67.59	146.61	212.18	102.26	77.99	113.08	46.71	92.51	48.6	62.41	168.69
ENSMMUG00000035653	1.62345	6.75515	0.111569	1	69.3	20	0	102.26	26	0	93.42	46.25	0	124.83	33.74
ENSMMUG00000023833	0.463151	10.2557	0.112967	1	1307.74	944.12	939.66	1175.93	1767.77	1046.01	1027.61	508.79	1287.9	1279.48	1282.01
ENSMMUG00000036811	3.16939	6.40471	0.113755	1	36.21	0	0	51.13	51.99	0	46.71	0	0	31.21	0
ENSMMUG00000034909	-1.27082	7.05745	0.126246	1	39.51	104.79	60.62	0	26	84.81	46.71	138.76	0	124.83	134.95
ENSMMUG00000025271	-1.4438	6.69799	0.139411	1	19.06	69.84	60.62	0	0	0	46.71	185.01	48.6	0	33.74
ENSMMUG00000033587	0.579568	9.86057	0.146369	1	1011.04	676.18	879.04	869.17	519.93	537.14	1261.16	647.55	1749.61	655.34	641.01
ENSMMUG00000028010	2.00815	6.57633	0.152197	1	45.59	7.58	30.31	51.13	51.99	0	0	0	0	124.83	0
ENSMMUG00000025750	-0.602628	9.98508	0.154313	1	764.52	1156.83	697.17	664.66	623.92	1498.34	653.93	508.79	631.8	1248.27	1923.02
ENSMMUG00000024646	-1.11539	7.31579	0.158248	1	63.39	137.02	272.81	0	26	56.54	186.84	185.01	72.9	31.21	33.74
ENSMMUG00000028536	-0.454654	11.2776	0.164251	1	2072.02	2860.9	3879.91	1891.72	1923.75	1300.44	2055.22	4070.33	2211.31	2278.1	2192.91
ENSMMUG00000024056	0.548298	12.2411	0.166376	1	5531.23	3781.79	5304.56	5163.89	9774.71	4127.49	3036.11	2220.18	6342.32	3339.13	3474.92
ENSMMUG00000027480	-0.46564	12.0092	0.167034	1	3483.47	4818.37	5031.75	4345.84	3327.56	2968.4	3783.47	8371.93	2964.61	2995.85	2901.39
ENSMMUG00000033596	-0.666694	8.20944	0.173305	1	188	296.8	303.12	153.38	103.99	197.89	280.26	416.28	121.5	280.86	269.9
ENSMMUG00000033223	0.558885	8.52515	0.174598	1	355.71	231.01	363.74	511.28	285.96	197.89	186.84	92.51	388.8	405.69	269.9
ENSMMUG00000025228	0.411395	11.3331	0.176282	1	2801.83	2109.42	2667.44	1993.98	3275.57	2374.72	1915.09	1202.6	3547.81	3276.71	2192.91
ENSMMUG00000024826	-0.530919	8.97522	0.181858	1	369.6	536.06	484.99	357.89	415.95	480.6	560.51	740.06	388.8	124.83	438.58
ENSMMUG00000026241	-2.82963	6.27382	0.181957	1	0	27.58	30.31	0	0	0	0	46.25	0	0	33.74
ENSMMUG00000025824	-2.82404	6.27152	0.181976	1	0	26.21	30.31	0	0	28.27	0	46.25	0	0	0
ENSMMUG00000027575	-2.82404	6.27152	0.181976	1	0	26.21	30.31	0	0	28.27	0	46.25	0	0	0
ENSMMUG00000035191	-2.81324	6.26711	0.182336	1	0	22.57	0	0	0	56.54	0	0	0	0	33.74
ENSMMUG00000027352	-2.80979	6.26575	0.182342	1	0	21.71	30.31	0	0	56.54	0	0	0	0	0
ENSMMUG00000036603	-2.82666	6.27246	0.182411	1	0	26.72	60.62	0	0	0	0	46.25	0	0	0
ENSMMUG00000028035	-1.67395	6.57681	0.183823	1	10.06	52.93	90.94	0	26	28.27	0	92.51	24.3	0	0
ENSMMUG00000034941	-0.509062	9.01058	0.184273	1	374.72	558.6	303.12	306.77	311.96	508.87	373.68	1017.58	413.1	468.1	404.85
ENSMMUG00000024168	-1.68496	6.58061	0.185008	1	10.06	56.4	30.31	0	26	56.54	0	138.76	24.3	0	0
ENSMMUG00000024923	0.439774	9.95177	0.185176	1	1024.51	770.84	848.73	460.15	1403.81	819.84	934.19	740.06	1044.9	1279.48	674.74
ENSMMUG00000032720	0.610739	8.0839	0.185401	1	245.04	153.68	212.18	204.51	233.97	141.35	280.26	92.51	194.4	312.07	168.69
ENSMMUG00000033863	0.341084	10.138	0.189164	1	1169.2	916.55	1121.54	1227.06	1455.81	961.2	1074.32	740.06	1215	873.79	843.43
ENSMMUG00000034426	-0.560367	9.31802	0.194268	1	484.52	719.31	575.92	715.79	571.92	508.87	513.8	1387.61	340.2	280.86	404.85
ENSMMUG00000027918	2.86847	6.33093	0.199528	1	24.26	0	0	0	26	0	46.71	0	48.6	0	0
ENSMMUG00000026432	1.16027	7.1185	0.199997	1	97.21	39.09	60.62	51.13	103.99	28.27	140.13	0	97.2	93.62	67.47
ENSMMUG00000033304	0.447519	10.2161	0.201389	1	1254.74	928.66	818.42	562.4	1273.83	932.93	1307.86	647.55	1725.31	1404.31	1315.75
ENSMMUG00000032848	0.282109	12.2425	0.203605	1	5196.94	4283.7	3819.28	6390.95	5641.26	3590.35	5184.75	5642.96	4835.71	3932.06	4082.19
ENSMMUG00000024671	0.4215	10.1122	0.204291	1	1157.09	876.29	1273.09	818.04	1611.79	678.49	1121.03	878.82	1360.8	873.79	674.74
ENSMMUG00000026455	0.394567	11.2603	0.206035	1	2643.24	2023.45	2394.63	1584.95	3639.52	2148.56	1774.96	1526.37	2721.61	3495.16	2024.23
ENSMMUG00000024462	-0.444037	9.8565	0.208462	1	753.73	1008.3	788.11	818.04	831.89	848.11	1074.32	878.82	607.5	436.9	1518.17
ENSMMUG00000037181	0.846684	7.64318	0.208589	1	161.2	91.51	121.25	102.26	181.98	84.81	140.13	92.51	194.4	187.24	67.47
ENSMMUG00000023961	0.890852	7.4895	0.210751	1	140.38	77.72	60.62	102.26	207.97	56.54	93.42	92.51	48.6	249.65	101.21
ENSMMUG00000027733	-1.4197	6.69509	0.214566	1	20.28	65.86	90.94	51.13	26	0	0	138.76	24.3	0	33.74
ENSMMUG00000036683	-0.54179	9.02853	0.215307	1	376.39	565.77	666.86	562.4	363.95	367.52	140.13	925.07	534.6	280.86	303.63
ENSMMUG00000025560	0.394095	10.2332	0.217277	1	1250.34	975.73	939.66	613.53	1559.79	819.84	1167.74	1063.84	1287.9	1622.75	1079.59
ENSMMUG00000026185	-1.00865	7.26878	0.218462	1	62.39	117.28	181.87	102.26	51.99	84.81	46.71	0	48.6	62.41	202.42
ENSMMUG00000033750	0.86425	7.6883	0.222534	1	186.31	104.49	90.94	357.89	155.98	28.27	140.13	231.27	121.5	156.03	67.47
ENSMMUG00000027752	-0.357205	11.9642	0.226465	1	3503.16	4496.31	5062.06	3834.57	3353.56	3024.94	4017.01	7030.57	2940.31	3370.33	2867.66
ENSMMUG00000024283	-0.254778	11.8383	0.230572	1	3291.93	3964.22	2970.55	2658.63	3041.6	3957.87	2942.7	4070.33	4009.51	3807.23	4858.15
ENSMMUG00000028206	1.27903	6.829	0.230984	1	69.65	21.2	0	102.26	103.99	84.81	93.42	0	48.6	0	0
ENSMMUG00000024400	1.23405	6.82561	0.23195	1	63.27	27.07	0	51.13	26	28.27	93.42	46.25	145.8	0	33.74
ENSMMUG00000036226	1.79721	6.51941	0.231981	1	38.13	8.43	0	0	26	0	46.71	0	24.3	93.62	33.74
ENSMMUG00000033837	-0.168576	13.9763	0.234091	1	15235.4	17071.4	18672	16923.2	15364	18262.7	14386.5	14246.1	13899.6	15603.4	17104.7
ENSMMUG00000035551	0.380555	9.36935	0.234568	1	661.11	500.48	636.55	715.79	649.91	480.6	513.8	277.52	801.9	624.14	607.27
ENSMMUG00000023939	1.5783	6.73263	0.235461	1	54.77	20	0	0	77.99	0	46.71	46.25	24.3	124.83	33.74
ENSMMUG00000024487	-0.303893	10.0594	0.235701	1	892.69	1121.05	1303.41	715.79	831.89	961.2	840.77	971.33	1263.6	811.38	1248.27
ENSMMUG00000035738	-0.607265	7.82088	0.240196	1	122.53	196.76	242.49	51.13	207.97	169.62	93.42	138.76	72.9	187.24	236.16
ENSMMUG00000026204	0.345648	10.703	0.242512	1	1753.34	1381.12	1394.34	1431.57	2599.66	1809.31	1307.86	971.33	1555.2	1872.41	1349.48
ENSMMUG00000027495	-0.413835	12.032	0.248448	1	3612.46	4816.48	4304.27	4754.86	3691.51	2968.4	4203.85	8788.21	2478.61	2933.44	3205.03
ENSMMUG00000032814	0.497258	10.9881	0.248487	1	2249.56	1593.15	2637.12	2147.36	3769.5	1356.98	2148.64	1433.87	2308.51	873.79	944.64
ENSMMUG00000032960	0.599751	8.0876	0.249647	1	246.06	159.03	181.87	204.51	259.97	113.08	373.68	138.76	267.3	124.83	202.42
ENSMMUG00000032946	-0.517808	8.8916	0.251076	1	341.55	476.7	363.74	255.64	389.95	763.3	420.39	138.76	267.3	374.48	641.01
ENSMMUG00000035865	-0.986199	6.9515	0.256748	1	37.08	73.57	90.94	0	51.99	169.62	46.71	0	24.3	62.41	33.74
ENSMMUG00000024276	-1.81373	6.40211	0.262939	1	6.24	33.79	60.62	0	0	28.27	0	46.25	0	31.21	0
ENSMMUG00000025452	-1.80106	6.40655	0.263035	1	10.23	33.28	30.31	51.13	0	56.54	0	46.25	0	0	0
ENSMMUG00000026582	-1.82876	6.40781	0.264301	1	6.24	38.28	60.62	0	0	0	0	92.51	0	31.21	0
ENSMMUG00000027479	0.220971	12.3535	0.265536	1	5503.05	4730.14	4364.89	4294.72	5251.31	5314.85	5651.84	3977.82	6949.82	5367.57	5262.99
ENSMMUG00000024995	-1.85921	6.41053	0.266382	1	4.86	43.12	0	0	0	0	0	138.76	24.3	0	33.74
tRNA-Arg-TCG-2-1	-1.85921	6.41053	0.266382	1	4.86	43.12	0	0	0	0	0	138.76	24.3	0	33.74
ENSMMUG00000026110	-0.335722	10.0904	0.267315	1	931	1165.93	788.11	1227.06	623.92	1046.01	934.19	1480.12	777.6	1092.24	1349.48
ENSMMUG00000035645	0.336558	9.80816	0.26809	1	908.26	712.85	1091.22	818.04	987.87	791.57	747.35	462.54	1020.6	967.41	506.06
ENSMMUG00000037192	0.328717	12.2596	0.268612	1	5294.14	4227.91	5728.92	3578.93	8136.93	3816.52	4390.69	3284.02	6026.42	4337.75	4082.19
ENSMMUG00000034870	0.689912	7.971	0.26982	1	232.35	143.76	0	255.64	207.97	141.35	326.97	231.27	121.5	249.65	202.42
ENSMMUG00000035750	0.529671	8.78846	0.27006	1	441.08	301.56	60.62	460.15	233.97	395.79	560.51	277.52	607.5	343.27	472.32
ENSMMUG00000026409	-0.58553	8.83355	0.272725	1	341.33	495.53	424.36	613.53	181.98	197.89	467.09	786.31	194.4	249.65	573.53
ENSMMUG00000024688	-0.703004	8.00185	0.273319	1	153.12	243.38	181.87	102.26	207.97	113.08	326.97	138.76	97.2	31.21	539.79
ENSMMUG00000024665	0.542703	7.92883	0.276691	1	213.87	136.3	181.87	306.77	181.98	169.62	140.13	92.51	97.2	343.27	101.21
ENSMMUG00000028390	-0.478873	9.06036	0.281698	1	418.96	569.03	454.68	715.79	389.95	424.06	513.8	925.07	194.4	280.86	472.32
ENSMMUG00000026039	-0.301796	9.98368	0.285654	1	842.23	1058.08	1394.34	562.4	805.89	989.47	840.77	971.33	1190.7	811.38	877.17
ENSMMUG00000037409	-0.787353	7.29071	0.285791	1	75.72	122.56	90.94	153.38	51.99	113.08	93.42	185.01	48.6	31.21	101.21
ENSMMUG00000026410	0.557402	8.07687	0.290348	1	241.77	164.95	242.49	255.64	155.98	84.81	280.26	231.27	267.3	249.65	101.21
ENSMMUG00000032750	-0.324756	9.802	0.291929	1	729.21	927.29	818.42	460.15	675.91	961.2	747.35	647.55	1044.9	717.76	1282.01
ENSMMUG00000026614	0.478419	9.09843	0.294916	1	528.76	389.14	363.74	204.51	571.92	565.41	326.97	323.78	729	811.38	303.63
ENSMMUG00000026648	-0.483664	8.05807	0.29915	1	166.2	248.88	242.49	153.38	259.97	113.08	140.13	370.03	121.5	156.03	269.9
ENSMMUG00000035047	-0.627039	7.79623	0.300007	1	114.27	186.75	181.87	51.13	103.99	282.7	93.42	46.25	291.6	31.21	236.16
ENSMMUG00000034936	-0.549141	7.95164	0.300748	1	147.14	230.48	151.56	153.38	233.97	197.89	140.13	370.03	145.8	62.41	202.42
ENSMMUG00000024365	0.499209	8.83341	0.30133	1	424.41	314.43	333.43	204.51	597.92	254.43	233.55	231.27	680.4	405.69	438.58
ENSMMUG00000024083	-1.42332	6.52888	0.307057	1	14.2	46.21	30.31	0	0	28.27	46.71	92.51	24.3	0	33.74
ENSMMUG00000025903	-0.961971	6.56832	0.307389	1	14.92	40.85	60.62	0	26	56.54	0	46.25	48.6	0	0
ENSMMUG00000037416	-1.44677	6.52331	0.308717	1	9.72	47.57	30.31	0	0	0	0	92.51	48.6	0	67.47
ENSMMUG00000024169	-0.681984	7.51033	0.309513	1	92.17	158.62	90.94	0	26	84.81	233.55	323.78	170.1	31.21	134.95
ENSMMUG00000027969	-1.428	6.51691	0.311684	1	10.06	41.88	121.25	0	26	0	0	46.25	24.3	0	0
ENSMMUG00000027767	1.10348	6.79592	0.312411	1	62.73	31.56	0	102.26	77.99	0	46.71	92.51	24.3	62.41	33.74
ENSMMUG00000027468	1.24976	6.83152	0.314345	1	65.49	26.72	60.62	0	51.99	0	140.13	46.25	72.9	62.41	0
ENSMMUG00000028170	-0.325077	11.9156	0.316612	1	3432.2	4302.63	3910.22	4601.48	3535.53	2968.4	3736.76	7261.84	2478.61	2808.61	3070.08
ENSMMUG00000036516	0.413925	9.34421	0.320661	1	656.21	505.86	303.12	460.15	779.9	339.25	934.19	740.06	607.5	499.31	641.01
ENSMMUG00000023839	-0.456322	8.96294	0.32175	1	386.95	529.43	272.81	562.4	207.97	367.52	467.09	971.33	291.6	405.69	506.06
ENSMMUG00000034706	-0.417306	8.70151	0.326519	1	314.89	421.12	303.12	460.15	207.97	282.7	326.97	693.81	267.3	312.07	404.85
ENSMMUG00000023953	-0.785924	7.56553	0.328981	1	92.22	151.25	181.87	102.26	51.99	254.43	46.71	0	72.9	187.24	168.69
ENSMMUG00000036232	0.383027	9.72483	0.337613	1	853.18	673.1	606.24	357.89	1247.84	735.03	980.9	878.82	899.1	780.17	472.32
ENSMMUG00000025257	-0.406942	8.94187	0.337843	1	372.95	507.39	394.05	306.77	259.97	254.43	420.39	740.06	315.9	561.72	641.01
ENSMMUG00000025382	1.41999	6.6758	0.340667	1	48.52	16.87	0	0	51.99	0	93.42	0	97.2	0	67.47
ENSMMUG00000027383	-0.303161	11.892	0.3413	1	3398.28	4193.3	5062.06	3834.57	3197.58	2629.16	4390.69	6383.02	2916.01	2652.58	2698.97
ENSMMUG00000025348	-0.49279	8.57905	0.341318	1	279.1	379.43	303.12	255.64	207.97	537.14	467.09	508.79	121.5	343.27	168.69
ENSMMUG00000037326	1.26406	6.62806	0.34195	1	45.56	15.5	0	51.13	129.98	28.27	46.71	0	0	0	33.74
ENSMMUG00000026768	-0.484372	8.83964	0.34398	1	346.53	491.22	394.05	409.02	285.96	169.62	513.8	1063.84	243	280.86	337.37
ENSMMUG00000025102	0.261653	16.8247	0.346798	1	125243	104466	101726	96171	172773	127246	106124	60962.4	115304	135843	127931
ENSMMUG00000025136	-0.784085	6.78173	0.350598	1	27.74	61.71	30.31	0	51.99	56.54	0	92.51	24.3	62.41	67.47
ENSMMUG00000028377	2.51527	6.2628	0.350926	1	16.3	0	0	0	26	0	0	0	24.3	31.21	0
ENSMMUG00000034851	2.53901	6.27526	0.351046	1	24.43	0	0	51.13	0	0	46.71	0	24.3	0	0
ENSMMUG00000027817	2.51267	6.26181	0.351325	1	15.96	0	0	0	0	0	0	0	48.6	31.21	0
ENSMMUG00000028451	-0.791196	6.78032	0.351368	1	26.7	62.22	60.62	0	77.99	28.27	0	92.51	24.3	31.21	67.47
ENSMMUG00000024746	2.52153	6.26636	0.351395	1	19.06	0	0	0	0	0	46.71	0	48.6	0	0
ENSMMUG00000026541	2.52153	6.26636	0.351395	1	19.06	0	0	0	0	0	46.71	0	48.6	0	0
ENSMMUG00000035944	2.52153	6.26636	0.351395	1	19.06	0	0	0	0	0	46.71	0	48.6	0	0
ENSMMUG00000028119	2.52312	6.26722	0.351424	1	19.95	0	0	51.13	0	0	0	0	48.6	0	0
ENSMMUG00000026811	-0.936063	6.82245	0.353244	1	30.5	61.15	30.31	0	26	113.08	46.71	0	48.6	31.21	101.21
ENSMMUG00000025419	1.56722	6.46127	0.355298	1	34.49	7.58	30.31	51.13	26	0	46.71	0	48.6	0	0
ENSMMUG00000024353	0.298927	9.21315	0.360691	1	584.3	463.32	575.92	869.17	467.94	367.52	467.09	370.03	680.4	436.9	539.79
ENSMMUG00000032751	0.35527	10.7557	0.362704	1	1810.28	1430.92	1758.08	818.04	3275.57	1413.52	1401.28	1202.6	2089.81	1466.72	1349.48
ENSMMUG00000033987	0.335577	9.62788	0.363547	1	782.66	632.96	515.3	460.15	597.92	706.76	794.06	601.3	1312.2	748.96	708.48
ENSMMUG00000028083	-0.857356	6.91002	0.365331	1	36.4	67.87	90.94	0	0	113.08	46.71	0	72.9	62.41	67.47
ENSMMUG00000025711	-0.881758	6.69972	0.365751	1	26.87	61.41	60.62	51.13	51.99	0	0	185.01	0	31.21	0
ENSMMUG00000035915	0.415942	8.6389	0.365891	1	364.14	273.74	454.68	255.64	623.92	197.89	326.97	138.76	364.5	249.65	303.63
ENSMMUG00000028134	-0.281619	11.7748	0.36721	1	3142.17	3842.47	3425.23	2965.4	3301.56	2572.62	3549.92	6706.79	2430.01	3463.95	2665.23
ENSMMUG00000032774	-0.197438	11.7922	0.369879	1	3243.06	3747.98	3698.04	2096.23	4107.46	4268.84	2895.99	3145.25	3402.01	3713.61	3879.77
ENSMMUG00000025148	-0.499327	8.0492	0.371349	1	174.13	243.01	242.49	255.64	285.96	169.62	186.84	323.78	48.6	93.62	236.16
ENSMMUG00000027698	-0.842907	6.92809	0.37312	1	45.75	72.02	151.56	102.26	0	56.54	46.71	46.25	48.6	31.21	33.74
ENSMMUG00000033056	0.497174	8.25775	0.375028	1	277.83	196.36	151.56	255.64	129.98	56.54	326.97	138.76	364.5	312.07	438.58
ENSMMUG00000025046	-0.528534	7.53056	0.37503	1	98.98	148.88	151.56	153.38	103.99	56.54	46.71	185.01	97.2	93.62	202.42
ENSMMUG00000026454	0.456658	7.94848	0.381255	1	201.09	148.21	121.25	204.51	181.98	197.89	140.13	138.76	291.6	187.24	134.95
ENSMMUG00000024346	-0.580112	7.73283	0.381993	1	125.83	171.25	181.87	204.51	51.99	254.43	140.13	46.25	170.1	62.41	202.42
ENSMMUG00000027930	-0.274306	12.052	0.386657	1	3841.37	4646.89	5153	4499.23	3613.52	3166.3	4811.07	7400.6	3037.51	3245.51	2867.66
ENSMMUG00000024743	0.320759	11.629	0.388316	1	3378.95	2707.65	3879.91	2300.74	5797.24	3392.46	2569.02	1803.9	3231.91	2995.85	1754.33
ENSMMUG00000034071	-0.463742	7.35459	0.392379	1	74.91	115.1	181.87	0	26	84.81	46.71	92.51	145.8	156.03	101.21
ENSMMUG00000033155	-0.278604	10.9942	0.394583	1	1796.24	2183.65	1758.08	971.42	1533.8	2516.07	2101.93	1896.4	1409.4	2964.65	2564.02
ENSMMUG00000026177	-0.373514	12.6797	0.396842	1	5761.18	7477.22	3637.41	5317.27	3145.59	4721.17	7660.35	15680	5005.81	7676.87	5870.26
ENSMMUG00000026727	0.805759	6.84692	0.396917	1	73.28	30.66	60.62	153.38	0	28.27	140.13	0	72.9	0	33.74
ENSMMUG00000027471	-0.287595	12.1767	0.399446	1	4176.7	5098.27	5456.12	5010.5	3951.48	3166.3	5558.43	8464.43	3304.81	3058.27	3306.24
ENSMMUG00000024248	-2.3316	6.19815	0.400005	1	0	15.5	0	0	0	28.27	0	0	0	0	33.74
ENSMMUG00000028237	-2.3316	6.19815	0.400005	1	0	15.5	0	0	0	28.27	0	0	0	0	33.74
ENSMMUG00000035843	-2.33404	6.19909	0.400006	1	0	16.01	30.31	0	0	0	0	0	0	0	33.74
ENSMMUG00000036399	-2.33404	6.19909	0.400006	1	0	16.01	30.31	0	0	0	0	0	0	0	33.74
ENSMMUG00000037362	-2.34259	6.2026	0.400046	1	0	19.14	30.31	0	0	0	0	46.25	0	0	0
ENSMMUG00000026703	-2.34012	6.20165	0.400047	1	0	18.63	0	0	0	28.27	0	46.25	0	0	0
ENSMMUG00000026787	-2.34012	6.20165	0.400047	1	0	18.63	0	0	0	28.27	0	46.25	0	0	0
ENSMMUG00000027370	-2.34012	6.20165	0.400047	1	0	18.63	0	0	0	28.27	0	46.25	0	0	0
ENSMMUG00000024539	-2.34611	6.20397	0.400047	1	0	20	0	0	0	0	0	46.25	0	0	33.74
ENSMMUG00000036269	-2.34611	6.20397	0.400047	1	0	20	0	0	0	0	0	46.25	0	0	33.74
ENSMMUG00000027600	-0.243895	11.9032	0.40745	1	3491.3	4144.09	4061.78	3834.57	3275.57	2940.13	4343.98	6706.79	3256.21	2746.2	2867.66
ENSMMUG00000025160	0.244998	13.0947	0.407958	1	9307.54	7859.15	8275.11	8129.28	12478.4	9470.62	6445.91	5087.91	12587.4	6896.7	8602.97
ENSMMUG00000025802	0.249965	10.2484	0.419241	1	1226.53	1026.3	1060.91	766.91	1559.79	1498.34	1307.86	601.3	1312.2	1185.86	944.64
ENSMMUG00000025111	0.327151	9.89843	0.421602	1	965.31	758.9	757.79	766.91	961.87	1215.63	887.48	185.01	1336.5	873.79	877.17
ENSMMUG00000026180	0.22299	11.1979	0.422273	1	2423.94	2080.45	2212.76	2198.49	3717.51	2600.89	1915.09	1618.88	2478.61	1809.99	1889.28
ENSMMUG00000027320	-0.314931	9.01416	0.422565	1	413.91	517.65	303.12	613.53	259.97	508.87	373.68	786.31	510.3	312.07	472.32
ENSMMUG00000036607	-0.408977	7.95587	0.422785	1	159.47	216.8	212.18	204.51	103.99	141.35	93.42	277.52	145.8	249.65	236.16
ENSMMUG00000025749	-0.42617	9.01829	0.426195	1	413.02	548.73	394.05	869.17	155.98	310.98	280.26	1017.58	291.6	468.1	472.32
ENSMMUG00000033542	0.97228	6.73298	0.429087	1	54.43	21.71	30.31	102.26	51.99	56.54	0	0	24.3	93.62	0
ENSMMUG00000027856	-0.259219	11.9662	0.431188	1	3634.75	4354.98	4516.45	4448.1	3613.52	3166.3	4203.85	7308.09	2818.81	3089.47	2429.07
ENSMMUG00000033248	-0.347177	8.6219	0.433404	1	277.57	378.74	333.43	255.64	493.93	424.06	93.42	555.04	388.8	156.03	202.42
ENSMMUG00000024976	-0.367077	7.86999	0.435869	1	141.46	194.7	272.81	102.26	129.98	84.81	93.42	185.01	194.4	187.24	236.16
ENSMMUG00000024869	-0.260571	13.7848	0.438732	1	12889.3	15446	12367.2	8078.16	16013.9	25669.6	11163.6	8464.43	13899.6	15291.3	15282.9
ENSMMUG00000028178	-0.415362	7.94243	0.443102	1	154.56	210.55	212.18	102.26	259.97	141.35	233.55	185.01	145.8	31.21	303.63
ENSMMUG00000026792	-0.213962	10.7286	0.449916	1	1497.02	1760.94	1849.02	818.04	1559.79	2120.29	1121.03	1387.61	1895.41	2090.86	1686.86
ENSMMUG00000024102	-0.48521	7.7006	0.452367	1	125.08	171.96	181.87	102.26	129.98	84.81	233.55	185.01	97.2	62.41	236.16
ENSMMUG00000026405	0.27311	11.7014	0.452941	1	3522.7	2932.36	3788.97	2760.89	5563.27	2233.37	3549.92	3885.31	3742.21	1997.24	1821.8
ENSMMUG00000033176	0.387198	9.13882	0.45367	1	548.06	427.09	60.62	306.77	441.94	565.41	607.22	508.79	729	655.34	573.53
ENSMMUG00000033069	0.285924	9.5278	0.456134	1	714.58	585.97	757.79	511.28	649.91	735.03	420.39	277.52	899.1	1092.24	573.53
ENSMMUG00000032815	0.203871	10.6817	0.464798	1	1672.32	1436.62	1818.71	1687.21	2209.71	1724.5	1494.7	786.31	1628.1	1341.89	1416.96
ENSMMUG00000027547	-0.240317	12.0644	0.464949	1	3922.55	4633.03	5092.38	4192.46	3249.57	2855.32	5651.84	7446.85	3086.11	3432.75	3137.55
ENSMMUG00000025832	-0.233798	11.8007	0.469323	1	3234.73	3803.27	2849.31	1891.72	3665.52	5965.07	3549.92	2451.45	2916.01	4150.5	3947.24
ENSMMUG00000034773	0.232287	12.3197	0.469664	1	5382.48	4585.18	4637.7	3936.82	8708.85	5230.04	4437.4	2636.46	5273.12	4556.19	5836.52
ENSMMUG00000036270	-0.307853	8.67731	0.475965	1	313.83	383.09	333.43	357.89	415.95	424.06	326.97	370.03	218.7	249.65	404.85
ENSMMUG00000034673	-1.44991	6.33257	0.476521	1	5.2	23.08	30.31	0	26	28.27	0	0	0	0	33.74
ENSMMUG00000035295	-1.44738	6.34439	0.476668	1	9.34	27.07	0	0	0	28.27	46.71	46.25	0	0	33.74
ENSMMUG00000035932	-1.45049	6.33757	0.477102	1	6.24	25.7	0	0	0	56.54	0	46.25	0	31.21	0
ENSMMUG00000028137	-1.43263	6.33864	0.477156	1	9.34	22.57	0	0	0	56.54	46.71	0	0	0	33.74
ENSMMUG00000036398	-1.45803	6.33387	0.477158	1	4.86	24.45	30.31	0	0	0	0	0	24.3	0	67.47
ENSMMUG00000027435	-1.42914	6.33729	0.477164	1	9.34	21.71	30.31	0	0	56.54	46.71	0	0	0	0
ENSMMUG00000025963	-1.45332	6.33392	0.477178	1	5.2	23.94	0	0	26	28.27	0	0	0	0	67.47
ENSMMUG00000024139	-1.47384	6.33987	0.477576	1	4.86	30.19	0	0	0	28.27	0	92.51	24.3	0	0
ENSMMUG00000025233	-1.44292	6.32841	0.478334	1	4.86	21.2	0	0	0	84.81	0	0	24.3	0	0
ENSMMUG00000033230	0.257302	11.5353	0.478544	1	3108.12	2598.27	2515.88	1789.47	3041.6	3562.08	2709.15	1110.09	3912.31	4088.09	3205.03
ENSMMUG00000028350	1.07843	6.58621	0.482421	1	44.37	16.87	0	102.26	26	0	0	0	0	93.62	67.47
ENSMMUG00000034680	-0.319903	8.60047	0.485661	1	300.46	381.68	212.18	409.02	337.96	169.62	373.68	740.06	194.4	187.24	404.85
ENSMMUG00000036337	-0.243572	10.404	0.488934	1	1190.83	1430.56	727.48	1431.57	1065.86	1243.9	747.35	2266.43	1117.8	1591.55	1484.43
ENSMMUG00000025533	-0.317011	8.74865	0.489466	1	326.28	417.46	606.24	153.38	337.96	226.16	467.09	601.3	267.3	405.69	236.16
ENSMMUG00000032760	-0.191256	15.1994	0.490949	1	35350.2	40365.2	31463.6	32414.9	36057.2	26630.8	48531.1	53469.3	24640.3	35107.7	49897.2
ENSMMUG00000032834	0.447573	7.82338	0.491182	1	181.11	131.18	30.31	153.38	207.97	254.43	186.84	138.76	170.1	187.24	101.21
ENSMMUG00000034628	-0.240004	13.5441	0.491344	1	11012	13012.6	13882.8	14827	11438.5	8481.15	11210.3	22433.1	9938.73	7645.67	7253.48
ENSMMUG00000037064	-0.463909	7.22493	0.491791	1	66.2	98.58	121.25	0	77.99	113.08	93.42	92.51	97.2	62.41	67.47
ENSMMUG00000037212	-0.22984	14.0239	0.492492	1	15379.8	18053.6	15944	9305.22	21473.2	24086.5	12191.2	10592.1	21602.8	12326.7	21591.8
ENSMMUG00000028064	0.233748	9.29838	0.499883	1	594.16	512.14	666.86	511.28	753.9	480.6	467.09	462.54	583.2	655.34	438.58
ENSMMUG00000025722	-0.386945	8.82282	0.502478	1	355.62	443.66	515.3	255.64	129.98	395.79	747.35	323.78	145.8	499.31	539.79
ENSMMUG00000026160	0.180529	13.062	0.503023	1	8929.41	7889.03	8699.48	6595.46	10944.6	9018.29	7006.42	5134.16	11955.6	8144.97	8704.18
ENSMMUG00000035242	-0.483066	7.08413	0.50366	1	56.69	84.28	30.31	51.13	26	113.08	46.71	92.51	97.2	62.41	101.21
ENSMMUG00000028518	-1.13515	6.47326	0.504663	1	15.42	39.14	30.31	51.13	26	0	0	92.51	0	0	33.74
ENSMMUG00000037073	-0.550273	8.04221	0.5067	1	152.08	232	121.25	51.13	77.99	254.43	0	46.25	194.4	436.9	506.06
ENSMMUG00000028067	0.34168	8.95791	0.508584	1	491.78	390.46	242.49	613.53	285.96	254.43	560.51	693.81	218.7	780.17	371.11
ENSMMUG00000032811	-0.24889	8.64612	0.50994	1	307.99	378.21	454.68	357.89	311.96	254.43	280.26	601.3	340.2	249.65	202.42
ENSMMUG00000024986	-0.359809	7.03228	0.512939	1	48.56	74.59	60.62	0	51.99	56.54	0	46.25	97.2	93.62	134.95
ENSMMUG00000037310	-0.208263	10.1299	0.512961	1	1001.23	1133.43	1000.29	1022.55	753.9	1554.88	1401.28	1202.6	923.4	905	775.95
ENSMMUG00000034854	0.534222	7.43452	0.513117	1	125.5	89.28	60.62	204.51	103.99	56.54	93.42	138.76	194.4	31.21	101.21
ENSMMUG00000027412	-0.752782	6.78978	0.515017	1	36.21	57.72	60.62	51.13	51.99	56.54	46.71	46.25	0	31.21	67.47
ENSMMUG00000023878	-0.932305	6.57037	0.517234	1	19.95	36.36	60.62	51.13	0	84.81	0	0	48.6	0	0
ENSMMUG00000025057	-0.390233	7.03811	0.517507	1	47.52	81.87	121.25	0	77.99	0	0	138.76	97.2	62.41	67.47
ENSMMUG00000036583	-0.751467	6.78473	0.517905	1	33.81	56.36	60.62	51.13	0	84.81	0	46.25	24.3	93.62	33.74
ENSMMUG00000024633	-0.660881	6.95197	0.52229	1	42.15	69.64	90.94	51.13	0	141.35	0	46.25	97.2	62.41	0
ENSMMUG00000036278	-0.615947	6.65248	0.525595	1	31.55	51.56	0	102.26	0	0	0	138.76	24.3	31.21	67.47
ENSMMUG00000028099	-0.843432	6.71091	0.528441	1	34.99	59.99	0	102.26	26	0	46.71	138.76	0	0	101.21
ENSMMUG00000033033	-0.255123	9.49586	0.529951	1	589.52	711.69	515.3	357.89	675.91	848.11	373.68	370.03	510.3	1029.82	1113.32
ENSMMUG00000036119	1.27974	6.40021	0.540202	1	26.53	8.43	0	51.13	26	0	0	0	24.3	31.21	33.74
ENSMMUG00000037053	1.30042	6.41057	0.540802	1	32.05	8.43	0	51.13	0	0	46.71	0	0	62.41	33.74
ENSMMUG00000032928	1.28139	6.40902	0.541788	1	30.51	11.56	0	102.26	26	0	0	46.25	24.3	0	0
ENSMMUG00000027929	1.27206	6.39367	0.541869	1	23.92	7.58	30.31	0	0	0	46.71	0	72.9	0	0
ENSMMUG00000035863	0.350277	8.3459	0.542853	1	290.59	236.5	242.49	255.64	285.96	84.81	373.68	416.28	194.4	343.27	202.42
ENSMMUG00000025173	0.234151	9.46424	0.545149	1	692.81	600.25	515.3	715.79	649.91	395.79	794.06	1017.58	461.7	842.58	472.32
ENSMMUG00000027769	-0.182333	12.1159	0.546012	1	4142.31	4704.48	4455.83	5215.01	4367.42	3449	4811.07	7539.36	3353.41	2964.65	3373.71
ENSMMUG00000025361	0.212461	12.4891	0.547684	1	6017.7	5207.24	4546.76	3681.19	7720.98	7208.98	4157.14	3607.79	9598.53	4930.67	5465.41
ENSMMUG00000035737	-0.306204	7.79274	0.547828	1	130.53	174.37	90.94	51.13	207.97	197.89	46.71	138.76	97.2	249.65	269.9
ENSMMUG00000024003	-0.197321	12.7246	0.555619	1	6279.14	7197.89	9942.26	3067.65	7617	7406.87	8034.03	3885.31	6123.62	6553.43	7557.11
ENSMMUG00000025132	-0.215463	11.1738	0.558338	1	2079.44	2415.59	2455.25	1584.95	2261.7	2600.89	1447.99	1063.84	1701.01	3401.54	3542.4
ENSMMUG00000034384	-0.230542	9.87464	0.559566	1	823.46	969.82	636.55	1278.19	545.93	480.6	700.64	1480.12	874.8	717.76	1282.01
ENSMMUG00000033035	0.215993	10.7486	0.563896	1	1739.47	1503.8	1788.39	971.42	2131.72	2007.21	1167.74	971.33	1773.91	2652.58	1248.27
ENSMMUG00000025344	-0.539454	7.18021	0.571917	1	66.24	106.09	0	102.26	0	113.08	0	277.52	72.9	156.03	33.74
ENSMMUG00000026102	-0.405075	7.50357	0.573857	1	106.77	132.71	121.25	204.51	77.99	169.62	46.71	138.76	48.6	156.03	101.21
ENSMMUG00000025475	0.920692	6.73058	0.577366	1	47.35	30.19	0	51.13	26	28.27	0	92.51	97.2	62.41	0
ENSMMUG00000035976	0.340242	7.79802	0.582072	1	177.22	140.85	151.56	153.38	285.96	113.08	280.26	231.27	72.9	93.62	67.47
ENSMMUG00000027324	0.108161	12.5085	0.583684	1	5941.5	5515.93	5637.99	5061.63	5823.23	6106.43	5838.68	4347.85	7678.82	5305.16	5971.47
ENSMMUG00000036590	0.1914	9.61474	0.584054	1	746.35	655.05	515.3	511.28	961.87	1102.55	607.22	462.54	777.6	873.79	539.79
ENSMMUG00000024693	0.292858	8.01504	0.584105	1	230.37	178.06	90.94	306.77	155.98	141.35	467.09	277.52	97.2	124.83	202.42
ENSMMUG00000025472	-0.382051	7.5239	0.586521	1	98.61	143.23	212.18	51.13	181.98	28.27	93.42	231.27	72.9	93.62	101.21
ENSMMUG00000024764	-0.274829	9.53606	0.588209	1	637.9	745.02	1394.34	920.3	623.92	537.14	934.19	508.79	243	468.1	539.79
ENSMMUG00000026474	-0.142304	16.4214	0.5902	1	83833.7	92530.2	117761	59410.2	113137	110255	85338.2	65217.8	95280.6	66002.4	76886.9
ENSMMUG00000026127	-0.130273	12.6104	0.592698	1	5930.55	6491.4	5395.49	3834.57	5953.22	7802.66	7053.13	5041.66	5759.12	7052.74	7725.8
ENSMMUG00000025611	0.283383	10.4653	0.592988	1	1439.41	1189.52	606.24	818.04	935.88	1243.9	887.48	647.55	2527.21	2028.44	2260.39
ENSMMUG00000035606	-0.344292	7.40388	0.59548	1	90.29	119.78	30.31	51.13	77.99	141.35	93.42	138.76	72.9	156.03	168.69
ENSMMUG00000024706	0.318846	8.41632	0.597703	1	312.58	253.65	212.18	409.02	389.95	226.16	420.39	508.79	218.7	124.83	67.47
ENSMMUG00000027861	-0.162677	12.0098	0.598657	1	3868.12	4338.64	4183.02	4601.48	4185.45	2742.24	4530.82	7123.08	2964.61	3058.27	3306.24
ENSMMUG00000032962	0.232119	9.64256	0.605601	1	778.77	664.03	636.55	664.66	753.9	367.52	840.77	370.03	1166.4	468.1	1282.01
ENSMMUG00000033610	-0.117951	15.5875	0.607532	1	47368.7	51412.5	47195.4	31699.1	54566.8	66322.6	47970.6	37511.8	49960.9	52645.9	54620.4
ENSMMUG00000027377	-0.162132	11.8993	0.61054	1	3580.65	4005.58	5183.31	4345.84	3769.5	2459.53	4157.14	5781.72	2697.31	2933.44	2597.76
ENSMMUG00000026634	-0.267254	8.65336	0.614097	1	319.34	360.77	333.43	357.89	311.96	452.33	420.39	185.01	194.4	312.07	472.32
ENSMMUG00000033050	-0.123951	16.088	0.614116	1	66899.6	72943.6	77810.3	45452.4	89766.2	69121.4	45308.2	66235.4	75111.5	78859.6	78607.5
ENSMMUG00000036730	-0.247778	8.34463	0.616911	1	244.57	295.15	90.94	357.89	103.99	310.98	233.55	508.79	340.2	187.24	269.9
ENSMMUG00000025393	2.04934	6.19246	0.622221	1	10.06	0	0	0	26	0	0	0	24.3	0	0
ENSMMUG00000036462	2.04934	6.19246	0.622221	1	10.06	0	0	0	26	0	0	0	24.3	0	0
ENSMMUG00000023981	2.05451	6.19497	0.622229	1	11.1	0	0	0	0	0	0	0	24.3	31.21	0
ENSMMUG00000025467	2.05451	6.19497	0.622229	1	11.1	0	0	0	0	0	0	0	24.3	31.21	0
ENSMMUG00000032797	2.05451	6.19497	0.622229	1	11.1	0	0	0	0	0	0	0	24.3	31.21	0
ENSMMUG00000025030	2.05666	6.19597	0.622229	1	11.44	0	0	0	26	0	0	0	0	31.21	0
ENSMMUG00000025558	2.05666	6.19597	0.622229	1	11.44	0	0	0	26	0	0	0	0	31.21	0
ENSMMUG00000028453	2.05666	6.19597	0.622229	1	11.44	0	0	0	26	0	0	0	0	31.21	0
ENSMMUG00000036596	2.06558	6.20056	0.62228	1	14.54	0	0	0	26	0	46.71	0	0	0	0
ENSMMUG00000036066	2.07088	6.20308	0.622282	1	15.58	0	0	0	0	0	46.71	0	0	31.21	0
ENSMMUG00000035152	2.07252	6.20394	0.622299	1	16.47	0	0	51.13	0	0	0	0	0	31.21	0
ENSMMUG00000026025	-0.19168	9.36311	0.629895	1	551.32	631.63	1060.91	357.89	441.94	395.79	607.22	462.54	631.8	717.76	607.27
ENSMMUG00000034390	-0.289649	7.84437	0.635461	1	157.13	193.72	90.94	153.38	129.98	56.54	280.26	323.78	97.2	124.83	303.63
ENSMMUG00000033896	-0.347266	7.98072	0.635958	1	167.3	204.29	303.12	255.64	51.99	197.89	46.71	46.25	170.1	312.07	269.9
ENSMMUG00000024323	-0.131313	12.6483	0.639437	1	6096.76	6679.49	10093.8	6288.69	7123.06	5230.04	6305.78	7446.85	5929.22	4837.05	3947.24
ENSMMUG00000024837	-0.298442	7.78232	0.640364	1	142.24	181.3	121.25	51.13	77.99	56.54	280.26	277.52	145.8	156.03	269.9
ENSMMUG00000026121	-0.376711	7.59047	0.647835	1	99.7	136.14	181.87	51.13	181.98	282.7	46.71	46.25	218.7	0	33.74
ENSMMUG00000035659	-0.155141	9.72702	0.653718	1	753.44	842.26	545.61	818.04	701.91	819.84	887.48	1295.1	486	873.79	708.48
ENSMMUG00000036830	-0.213831	9.34924	0.656902	1	538.7	616.27	515.3	511.28	727.9	1102.55	420.39	138.76	534.6	499.31	708.48
ENSMMUG00000034149	0.240204	7.95009	0.664053	1	195.35	158.36	151.56	255.64	155.98	254.43	186.84	92.51	315.9	62.41	134.95
ENSMMUG00000027425	0.42294	6.98067	0.665774	1	77.94	49.45	151.56	102.26	51.99	0	186.84	46.25	48.6	0	0
ENSMMUG00000027715	0.804438	6.52923	0.669559	1	33.94	23.13	0	0	51.99	0	93.42	92.51	24.3	0	0
ENSMMUG00000033673	-0.279222	8.836	0.670811	1	358.99	426.09	272.81	204.51	285.96	706.76	513.8	185.01	72.9	717.76	539.79
ENSMMUG00000026639	-0.446917	7.28742	0.67202	1	72.65	101.48	303.12	51.13	26	56.54	46.71	46.25	145.8	93.62	0
ENSMMUG00000036639	0.836152	6.52608	0.673603	1	34.31	16.87	0	0	0	0	46.71	0	0	124.83	67.47
ENSMMUG00000035888	1.02146	6.55904	0.674294	1	30.54	15.16	60.62	0	0	0	0	0	121.5	31.21	0
ENSMMUG00000026037	0.116175	10.473	0.674626	1	1408.67	1280.33	1060.91	1687.21	1143.85	1865.85	1121.03	878.82	1530.9	1560.34	1315.75
ENSMMUG00000024242	0.340935	7.95233	0.68136	1	180.19	150.9	151.56	51.13	233.97	169.62	46.71	46.25	413.1	156.03	236.16
ENSMMUG00000035513	-0.498598	6.93422	0.682786	1	50.28	70.14	30.31	102.26	0	56.54	0	92.51	24.3	124.83	101.21
ENSMMUG00000024851	0.142709	10.516	0.685497	1	1452.88	1304.08	1091.22	1431.57	1507.8	1950.66	1261.16	555.04	1846.81	1217.07	1619.38
ENSMMUG00000024647	0.236701	10.0859	0.688458	1	1085.07	927.08	1636.84	920.3	1351.82	113.08	794.06	878.82	1142.1	1217.07	1079.59
ENSMMUG00000027366	0.322724	7.91168	0.689172	1	182.02	142.65	90.94	102.26	233.97	310.98	46.71	0	121.5	405.69	168.69
ENSMMUG00000033085	-0.334424	6.87208	0.702057	1	42.83	56.82	30.31	51.13	51.99	28.27	0	0	48.6	62.41	168.69
ENSMMUG00000026686	-0.156605	9.38284	0.705233	1	578.42	649.93	818.42	869.17	441.94	282.7	373.68	925.07	583.2	624.14	573.53
ENSMMUG00000034323	0.129805	12.3833	0.706977	1	5461.45	5017.9	2940.24	2914.27	5641.26	5710.64	5278.17	5550.45	8262.02	5211.54	5870.26
ENSMMUG00000026044	0.390715	7.35945	0.709315	1	106.93	82.57	90.94	51.13	103.99	113.08	140.13	92.51	145.8	93.62	33.74
ENSMMUG00000024709	-0.0895163	14.0075	0.71086	1	15932.1	16982.1	17702.1	12321.8	16091.9	14813.7	12191.2	18409	13996.8	25059.1	17003.5
ENSMMUG00000025425	-0.569637	6.74081	0.716963	1	31.88	54.64	30.31	0	26	28.27	46.71	92.51	24.3	62.41	67.47
ENSMMUG00000027976	-0.202985	8.11489	0.71752	1	197.16	232.7	212.18	102.26	311.96	226.16	280.26	323.78	72.9	218.45	168.69
ENSMMUG00000023907	0.168571	9.46697	0.719289	1	653.36	595.93	515.3	357.89	779.9	819.84	560.51	508.79	1069.2	499.31	539.79
ENSMMUG00000024421	-0.231127	7.81407	0.721017	1	139.17	171.97	272.81	51.13	233.97	141.35	140.13	138.76	145.8	124.83	134.95
ENSMMUG00000023942	0.111518	13.9939	0.729103	1	16800.3	15551.8	10275.7	11196.9	16325.9	21344.2	17983.1	14292.4	12125.7	26369.8	16295
ENSMMUG00000033530	0.384713	7.42838	0.73238	1	107.14	85.48	30.31	0	129.98	197.89	93.42	46.25	218.7	93.62	67.47
ENSMMUG00000036758	0.209282	8.72676	0.736825	1	374.26	321.98	151.56	460.15	519.93	424.06	93.42	138.76	267.3	530.52	573.53
ENSMMUG00000027728	-0.618479	6.63571	0.740547	1	24.6	46.72	60.62	0	51.99	0	46.71	92.51	24.3	0	33.74
ENSMMUG00000028261	0.17716	7.91348	0.7485	1	197.16	170.13	121.25	306.77	233.97	113.08	233.55	277.52	24.3	187.24	168.69
ENSMMUG00000025398	0.225129	8.01146	0.758374	1	201.79	172.44	0	204.51	103.99	226.16	186.84	92.51	388.8	124.83	371.11
ENSMMUG00000028374	-0.157228	7.28646	0.758405	1	85.43	107.96	30.31	51.13	51.99	56.54	140.13	277.52	121.5	62.41	67.47
ENSMMUG00000027331	0.577523	6.63363	0.759727	1	41.07	24.45	30.31	51.13	51.99	0	46.71	0	24.3	31.21	67.47
ENSMMUG00000034836	0.56419	6.63193	0.759914	1	39.35	27.07	0	51.13	26	28.27	46.71	46.25	72.9	0	33.74
ENSMMUG00000026229	-0.0921645	14.4143	0.760139	1	21120.9	22531.8	21066.7	13395.4	30961.9	28496.7	16908.8	14754.9	27361.9	16976.5	25808.9
ENSMMUG00000024846	0.0873003	15.2865	0.763236	1	40954.8	38564.1	41951.5	34408.9	69072.9	42688.4	32930.2	33348.9	40775.5	27586.8	36267.4
ENSMMUG00000033208	0.0716296	12.5394	0.765885	1	6002.4	5721.47	4910.51	4857.12	5381.29	6247.78	5651.84	4440.36	8067.62	6054.12	7287.22
ENSMMUG00000027385	-0.330926	6.56944	0.76651	1	20.46	34.64	30.31	0	77.99	28.27	0	46.25	24.3	0	33.74
ENSMMUG00000033244	-0.654298	6.51967	0.766602	1	19.74	31.51	30.31	0	51.99	28.27	46.71	0	0	0	67.47
ENSMMUG00000028123	-0.67941	6.52766	0.766801	1	19.95	39.14	30.31	51.13	0	0	0	92.51	48.6	0	33.74
ENSMMUG00000032912	0.0822522	11.7397	0.767012	1	3414.72	3246.72	3546.48	2403	4679.38	3759.98	2615.73	2913.99	3256.21	4119.3	2766.44
ENSMMUG00000024466	-0.645078	6.53624	0.767047	1	26.69	36.01	30.31	102.26	0	0	0	46.25	0	31.21	67.47
ENSMMUG00000026681	-0.647682	6.51227	0.767441	1	17.34	28.78	30.31	0	0	84.81	0	0	24.3	62.41	0
ENSMMUG00000026641	-0.126325	7.65425	0.771374	1	125.11	144.27	121.25	0	129.98	169.62	186.84	185.01	121.5	187.24	101.21
ENSMMUG00000025857	0.114781	8.64969	0.77906	1	341.45	315.17	363.74	306.77	467.94	395.79	280.26	231.27	340.2	312.07	269.9
ENSMMUG00000036503	-0.0933536	16.1952	0.781342	1	72818.6	77702.4	41345.2	66414.7	44246.2	61799.3	86786.2	128585	73118.9	93526.8	79079.8
ENSMMUG00000032878	-0.0971833	8.8369	0.782997	1	371.56	404.23	515.3	204.51	467.94	339.25	467.09	323.78	437.4	280.86	438.58
ENSMMUG00000032852	0.482862	7.0036	0.783051	1	70.35	50.66	60.62	0	51.99	28.27	140.13	46.25	97.2	62.41	67.47
ENSMMUG00000023916	0.380071	6.98147	0.785128	1	74.7	53.27	30.31	153.38	0	56.54	46.71	92.51	48.6	124.83	33.74
ENSMMUG00000028449	0.0666009	11.4303	0.785899	1	2740.67	2614	3516.16	2709.76	2651.65	2770.51	2242.05	1942.66	3572.11	2527.75	2226.65
ENSMMUG00000024011	-0.766144	6.39321	0.797103	1	10.06	23.08	30.31	0	26	28.27	0	0	24.3	0	33.74
ENSMMUG00000028397	-0.766144	6.39321	0.797103	1	10.06	23.08	30.31	0	26	28.27	0	0	24.3	0	33.74
ENSMMUG00000033277	-0.759222	6.3966	0.797108	1	11.44	23.08	30.31	0	26	28.27	0	0	0	31.21	33.74
ENSMMUG00000027431	-0.774625	6.40133	0.797117	1	11.1	27.58	30.31	0	0	0	0	46.25	24.3	31.21	33.74
ENSMMUG00000034355	-0.777275	6.39797	0.797117	1	10.06	27.07	0	0	26	28.27	0	46.25	24.3	0	33.74
ENSMMUG00000036772	-0.760768	6.40358	0.797162	1	14.2	26.21	30.31	0	0	28.27	46.71	46.25	24.3	0	0
ENSMMUG00000036079	-0.746152	6.40103	0.797376	1	15.42	22.57	0	51.13	26	56.54	0	0	0	0	33.74
ENSMMUG00000033201	-0.794009	6.40367	0.797538	1	10.06	31.56	0	0	26	0	0	92.51	24.3	0	33.74
ENSMMUG00000035313	-0.76296	6.39001	0.797541	1	9.72	21.71	30.31	0	0	56.54	0	0	48.6	0	0
ENSMMUG00000028489	-0.775862	6.40929	0.797602	1	14.2	30.7	30.31	0	0	0	46.71	92.51	24.3	0	0
ENSMMUG00000034369	-0.77785	6.41148	0.797608	1	15.09	31.56	0	51.13	0	0	0	92.51	24.3	0	33.74
ENSMMUG00000025613	-0.741825	6.39697	0.797942	1	14.2	21.2	0	0	0	84.81	46.71	0	24.3	0	0
ENSMMUG00000036136	-0.755248	6.39101	0.798243	1	10.4	21.2	0	0	51.99	84.81	0	0	0	0	0
ENSMMUG00000033798	-0.161172	8.2247	0.802013	1	228.88	263.22	212.18	153.38	103.99	28.27	373.68	508.79	170.1	343.27	303.63
ENSMMUG00000026295	-0.127778	8.34226	0.804577	1	237.31	279.24	424.36	153.38	311.96	141.35	186.84	416.28	315.9	218.45	134.95
ENSMMUG00000028030	0.918007	6.3388	0.805527	1	19.4	11.56	0	0	26	0	46.71	46.25	24.3	0	0
ENSMMUG00000036216	0.940521	6.35013	0.805539	1	25.81	11.56	0	51.13	0	0	46.71	46.25	0	31.21	0
ENSMMUG00000036554	0.490584	6.27743	0.805691	1	19.57	7.07	0	51.13	0	28.27	46.71	0	0	0	0
ENSMMUG00000027721	0.91528	6.33782	0.805797	1	19.06	11.56	0	0	0	0	46.71	46.25	48.6	0	0
ENSMMUG00000026611	-0.0932256	11.7242	0.810184	1	3196.12	3418.92	2394.63	1687.21	2833.63	4551.55	2242.05	1803.9	4131.01	5086.71	4925.62
ENSMMUG00000025554	0.0655818	12.6111	0.818059	1	6298	6032.21	7487.01	5879.67	9072.8	5456.21	4951.2	5180.42	7435.82	4150.5	6005.21
ENSMMUG00000032884	-0.205824	8.04545	0.820719	1	190.77	206.79	242.49	153.38	129.98	310.98	326.97	138.76	218.7	124.83	134.95
ENSMMUG00000024314	0.164351	8.32216	0.820766	1	265.34	231.42	121.25	153.38	129.98	395.79	373.68	138.76	388.8	280.86	269.9
ENSMMUG00000026062	-0.0623512	10.3988	0.823581	1	1242.35	1311.28	1364.03	1175.93	1715.77	1611.42	887.48	1156.34	1652.4	780.17	1113.32
ENSMMUG00000026788	0.0464559	13.3865	0.824081	1	10785.5	10458	12003.5	8436.05	11932.4	9329.26	12611.5	10175.8	12490.2	8457.04	10323.6
ENSMMUG00000037184	0.419936	6.7397	0.833962	1	49.37	34.13	0	51.13	77.99	56.54	93.42	46.25	24.3	0	33.74
ENSMMUG00000027812	-0.96225	6.26458	0.835633	1	5.2	14.65	30.31	0	26	28.27	0	0	0	0	0
ENSMMUG00000027932	-0.970288	6.26588	0.835634	1	4.86	16.01	30.31	0	0	0	0	0	24.3	0	33.74
ENSMMUG00000032839	-0.956943	6.26706	0.835638	1	6.24	14.65	30.31	0	0	28.27	0	0	0	31.21	0
ENSMMUG00000034977	-0.978828	6.26936	0.835646	1	4.86	19.14	30.31	0	0	0	0	46.25	24.3	0	0
ENSMMUG00000025468	-0.98232	6.27072	0.835647	1	4.86	20	0	0	0	0	0	46.25	24.3	0	33.74
ENSMMUG00000036041	-0.976634	6.27035	0.835648	1	5.2	19.14	30.31	0	26	0	0	46.25	0	0	0
ENSMMUG00000027410	-0.974826	6.2742	0.835653	1	6.24	20	0	0	0	0	0	46.25	0	31.21	33.74
ENSMMUG00000027580	-0.974826	6.2742	0.835653	1	6.24	20	0	0	0	0	0	46.25	0	31.21	33.74
ENSMMUG00000027638	-0.974826	6.2742	0.835653	1	6.24	20	0	0	0	0	0	46.25	0	31.21	33.74
ENSMMUG00000024994	-0.947792	6.27162	0.835657	1	9.34	14.65	30.31	0	0	28.27	46.71	0	0	0	0
ENSMMUG00000026254	-0.947792	6.27162	0.835657	1	9.34	14.65	30.31	0	0	28.27	46.71	0	0	0	0
ENSMMUG00000023875	-0.949603	6.27384	0.835664	1	10.23	15.5	0	51.13	0	28.27	0	0	0	0	33.74
ENSMMUG00000026577	-0.96225	6.27741	0.835672	1	9.34	19.14	30.31	0	0	0	46.71	46.25	0	0	0
ENSMMUG00000036495	-0.965792	6.27878	0.835672	1	9.34	20	0	0	0	0	46.71	46.25	0	0	33.74
ENSMMUG00000027891	-0.958121	6.27733	0.835678	1	10.23	18.63	0	51.13	0	28.27	0	46.25	0	0	0
ENSMMUG00000025207	-0.964172	6.27964	0.835678	1	10.23	20	0	51.13	0	0	0	46.25	0	0	33.74
ENSMMUG00000025627	-0.953856	6.26613	0.835749	1	6.24	14.14	0	0	0	56.54	0	0	0	31.21	0
ENSMMUG00000027653	-0.967014	6.26452	0.835754	1	4.86	15.16	60.62	0	0	0	0	0	24.3	0	0
ENSMMUG00000025597	-0.942209	6.27154	0.835779	1	10.23	14.14	0	51.13	0	56.54	0	0	0	0	0
ENSMMUG00000025698	-0.966395	6.27071	0.835783	1	6.24	16.87	0	0	0	0	0	0	0	31.21	67.47
ENSMMUG00000025184	-0.994309	6.27421	0.835863	1	4.86	23.13	0	0	0	0	0	92.51	24.3	0	0
ENSMMUG00000024747	0.10466	10.7241	0.836815	1	1658.67	1545.54	757.79	1124.81	1325.83	2120.29	1214.45	740.06	2381.41	2246.89	2564.02
ENSMMUG00000036707	-0.0625479	11.4884	0.840386	1	2744.73	2859.38	3425.23	1738.34	3093.59	3420.73	3036.11	1757.64	2235.61	3619.99	2833.92
ENSMMUG00000026673	0.0677323	9.95118	0.847067	1	932.59	887.03	879.04	562.4	1091.86	1215.63	1027.61	508.79	1044.9	936.2	944.64
ENSMMUG00000025943	-0.193862	7.00738	0.84777	1	54.97	72.42	60.62	51.13	26	56.54	0	138.76	72.9	124.83	33.74
ENSMMUG00000027793	-0.46821	6.99725	0.849171	1	49.91	67.87	90.94	0	77.99	113.08	46.71	0	0	124.83	67.47
ENSMMUG00000027726	-0.194004	6.94278	0.852941	1	56.15	72.97	60.62	102.26	51.99	0	46.71	231.27	48.6	31.21	0
ENSMMUG00000024320	-0.0970723	7.75167	0.853031	1	145.9	165.06	30.31	102.26	155.98	226.16	186.84	370.03	97.2	187.24	33.74
ENSMMUG00000026265	0.0401038	13.2148	0.86666	1	9534.18	9293.85	10215.1	7515.75	12062.4	9357.53	7660.35	7076.82	11007.9	9424.45	10526
ENSMMUG00000028439	0.190145	7.37399	0.869768	1	110.59	92.02	151.56	204.51	77.99	56.54	93.42	92.51	145.8	31.21	67.47
ENSMMUG00000024535	0.100426	8.54319	0.877187	1	317.36	290.28	121.25	357.89	259.97	593.68	233.55	277.52	267.3	468.1	168.69
ENSMMUG00000032915	-0.314752	6.87814	0.880563	1	47.85	55.96	60.62	102.26	26	28.27	0	0	48.6	62.41	134.95
ENSMMUG00000033222	0.118142	8.55673	0.88117	1	316.27	302.5	303.12	255.64	493.93	254.43	373.68	416.28	364.5	93.62	236.16
ENSMMUG00000032901	0.124726	9.23646	0.881295	1	531.67	495.88	697.17	255.64	1117.85	650.22	233.55	231.27	583.2	468.1	404.85
ENSMMUG00000033865	-0.0491526	9.20156	0.88313	1	508.68	539.81	636.55	460.15	675.91	424.06	373.68	693.81	315.9	717.76	404.85
ENSMMUG00000032883	0.0841708	8.29364	0.892809	1	253.66	229.27	212.18	102.26	233.97	367.52	373.68	0	121.5	436.9	337.37
ENSMMUG00000025201	0.216745	7.87378	0.894664	1	164.91	158.92	60.62	51.13	103.99	141.35	93.42	231.27	388.8	187.24	202.42
ENSMMUG00000036882	0.438302	6.87535	0.89832	1	57.53	44.84	30.31	0	26	56.54	140.13	92.51	121.5	0	0
ENSMMUG00000026596	0.0388795	12.6439	0.8999	1	6411.61	6242.09	4001.15	5266.14	5355.29	7406.87	6913	6475.52	4787.11	9736.52	7084.8
ENSMMUG00000024318	-0.0841172	7.59728	0.900582	1	138.46	145.68	0	357.89	129.98	56.54	93.42	323.78	48.6	62.41	202.42
ENSMMUG00000033622	0.110453	7.48231	0.903085	1	112.68	105.25	121.25	102.26	129.98	84.81	46.71	46.25	97.2	187.24	168.69
ENSMMUG00000024366	-0.120368	7.89698	0.903182	1	169.7	174.84	151.56	357.89	259.97	197.89	46.71	46.25	121.5	62.41	303.63
ENSMMUG00000034442	-0.0456267	10.7845	0.904276	1	1696.66	1736.15	1576.21	2556.38	1195.84	1470.07	1681.54	2312.69	1458	1591.55	1585.64
ENSMMUG00000037214	0.0696659	9.3357	0.904852	1	580.89	556.68	606.24	460.15	545.93	621.95	420.39	323.78	729	748.96	674.74
ENSMMUG00000025862	0.0380042	11.1149	0.9056	1	2172.42	2127.44	1667.15	1891.72	2209.71	2544.34	2101.93	2543.96	1725.31	2933.44	1754.33
ENSMMUG00000034621	-0.119171	7.25628	0.908378	1	79.75	88.89	151.56	102.26	103.99	56.54	46.71	46.25	145.8	0	101.21
ENSMMUG00000033012	-0.235334	7.24452	0.908599	1	80.6	99.99	90.94	153.38	129.98	56.54	46.71	185.01	72.9	0	67.47
ENSMMUG00000027317	0.555414	6.46801	0.909611	1	30.67	16.01	30.31	51.13	0	0	46.71	0	24.3	31.21	33.74
ENSMMUG00000033170	0.537978	6.45871	0.909816	1	25.48	16.01	30.31	51.13	51.99	0	0	0	24.3	0	33.74
ENSMMUG00000034409	0.533209	6.46682	0.909821	1	26.87	20	0	51.13	51.99	0	0	46.25	0	31.21	33.74
ENSMMUG00000024807	0.79564	6.51046	0.909978	1	26.02	18.63	0	0	26	28.27	0	46.25	72.9	31.21	0
ENSMMUG00000033003	0.538045	6.47717	0.910077	1	31.01	23.13	0	51.13	26	0	46.71	92.51	0	31.21	0
ENSMMUG00000035353	0.55837	6.46326	0.910346	1	30.17	14.65	30.31	102.26	0	28.27	0	0	48.6	0	0
ENSMMUG00000027498	0.565277	6.46402	0.910347	1	29.79	14.14	0	0	0	56.54	93.42	0	24.3	31.21	0
ENSMMUG00000025985	-0.139995	7.81817	0.910486	1	155.79	169.92	60.62	153.38	129.98	197.89	186.84	185.01	121.5	187.24	236.16
ENSMMUG00000027705	0.776032	6.50935	0.910774	1	24.64	20	0	0	26	0	0	46.25	97.2	0	33.74
ENSMMUG00000033108	0.0249977	14.2792	0.911741	1	19943.8	19638.4	20945.4	14264.6	22331.1	16707.9	17889.7	17992.7	22015.9	23217.9	22907.5
ENSMMUG00000026085	0.0705509	9.5207	0.912107	1	671.68	638.21	333.43	357.89	415.95	819.84	700.64	185.01	947.7	936.2	1214.54
ENSMMUG00000028360	-0.135361	6.81947	0.917361	1	38.5	49.29	60.62	0	26	56.54	0	46.25	72.9	93.62	33.74
ENSMMUG00000034081	-0.0782082	8.40133	0.917533	1	261.54	274.43	333.43	153.38	181.98	254.43	326.97	138.76	364.5	280.86	371.11
ENSMMUG00000023917	-0.333599	6.78833	0.917934	1	38.13	52.88	30.31	0	26	0	46.71	46.25	24.3	93.62	134.95
ENSMMUG00000035867	-0.326266	6.86426	0.918963	1	39.88	53.57	0	0	26	113.08	0	0	48.6	124.83	101.21
ENSMMUG00000033806	-0.240826	7.54831	0.922484	1	112.3	129.24	181.87	102.26	129.98	141.35	93.42	92.51	48.6	187.24	101.21
ENSMMUG00000027434	0.176714	7.21568	0.923064	1	93.54	80.85	60.62	102.26	129.98	56.54	186.84	138.76	48.6	0	67.47
ENSMMUG00000025353	0.0440482	9.53561	0.926211	1	685.26	655.81	969.98	511.28	441.94	452.33	794.06	323.78	680.4	998.62	877.17
ENSMMUG00000025983	-0.113286	8.01985	0.927047	1	191.43	204.94	333.43	153.38	285.96	141.35	326.97	277.52	97.2	93.62	67.47
ENSMMUG00000024729	0.227268	7.54374	0.93502	1	122.74	116	121.25	102.26	129.98	56.54	93.42	185.01	194.4	93.62	101.21
ENSMMUG00000027955	-0.132651	7.1972	0.938605	1	70.91	93.27	30.31	51.13	103.99	56.54	46.71	185.01	121.5	31.21	101.21
ENSMMUG00000024847	0.0803474	8.60573	0.940683	1	347.94	326.94	151.56	511.28	207.97	141.35	420.39	508.79	194.4	405.69	506.06
ENSMMUG00000023932	-0.0267953	9.36446	0.943728	1	577.31	587.24	484.99	357.89	779.9	932.93	513.8	323.78	486	748.96	607.27
ENSMMUG00000025809	0.216766	7.54288	0.944231	1	121.7	113.62	60.62	102.26	207.97	141.35	0	185.01	48.6	249.65	67.47
ENSMMUG00000028512	0.214354	6.92408	0.945633	1	59.59	52.42	60.62	0	77.99	56.54	140.13	92.51	48.6	31.21	0
ENSMMUG00000023922	0.0299875	10.8587	0.945821	1	1795.91	1762.62	2273.38	1993.98	2781.63	1837.58	1074.32	1387.61	1725.31	1404.31	1551.91
ENSMMUG00000026493	-0.0144949	10.5667	0.949762	1	1421.63	1464.6	939.66	971.42	1611.79	1667.96	840.77	1665.13	1530.9	2153.27	1585.64
ENSMMUG00000026059	0.0393664	9.71106	0.950039	1	767.16	754.85	757.79	511.28	883.88	1074.28	653.93	647.55	850.5	936.2	539.79
ENSMMUG00000027786	0.0425014	9.75304	0.951689	1	788.53	778.06	484.99	613.53	571.92	1102.55	467.09	647.55	1385.1	905	877.17
ENSMMUG00000025096	0.0176267	13.2348	0.95322	1	9601.55	9526.06	9275.4	6748.84	12426.4	9583.7	9061.64	10777.1	8723.73	11047.2	8468.02
ENSMMUG00000024438	-0.0363777	6.65398	0.962216	1	38.29	43.12	0	51.13	0	0	46.71	138.76	0	93.62	33.74
ENSMMUG00000024942	-0.133409	6.73573	0.962222	1	34.86	50.19	0	51.13	26	28.27	0	138.76	97.2	0	33.74
ENSMMUG00000025279	-0.34004	6.68652	0.962245	1	30.68	46.72	60.62	51.13	77.99	0	0	92.51	24.3	0	33.74
ENSMMUG00000033134	-0.312697	6.77601	0.962253	1	37.08	45.3	90.94	0	51.99	56.54	46.71	0	24.3	62.41	33.74
ENSMMUG00000026456	-0.0099223	13.2867	0.971289	1	9859.86	9947.21	15065	4294.72	9878.7	9357.53	6025.52	7539.36	16524	12576.3	7827.01
ENSMMUG00000024178	-0.0484814	7.06846	0.972517	1	70.02	78.62	0	102.26	51.99	28.27	46.71	185.01	24.3	124.83	101.21
ENSMMUG00000035975	-0.314946	7.07424	0.972574	1	71.02	82.22	60.62	102.26	26	28.27	140.13	138.76	24.3	62.41	101.21
ENSMMUG00000036597	0.000302637	11.7414	0.98296	1	3329.51	3357.93	2970.55	2249.61	3223.57	3844.79	2569.02	3006.49	5297.42	3307.92	3609.87
ENSMMUG00000035506	0.37466	6.58889	0.983095	1	41.78	23.59	60.62	153.38	0	0	0	0	24.3	31.21	33.74
ENSMMUG00000033822	0.519557	6.61558	0.983711	1	29.84	25.3	0	0	51.99	0	0	0	97.2	0	101.21
ENSMMUG00000035756	0.549758	6.61272	0.983722	1	30.86	21.71	30.31	0	129.98	56.54	0	0	24.3	0	0
ENSMMUG00000024815	0.256589	7.0352	0.989099	1	65	59.09	60.62	51.13	129.98	28.27	46.71	46.25	97.2	0	101.21
ENSMMUG00000028527	0.121303	7.34938	0.991883	1	108.1	90.65	151.56	102.26	77.99	84.81	186.84	92.51	48.6	124.83	33.74
ENSMMUG00000024552	0.114218	7.86654	0.995852	1	165.25	163.02	151.56	153.38	77.99	113.08	46.71	185.01	267.3	280.86	202.42
ENSMMUG00000028145	-0.025629	7.58452	0.995963	1	139.46	131.39	90.94	255.64	129.98	169.62	186.84	231.27	0	124.83	33.74
ENSMMUG00000024125	0.063233	8.06093	0.996941	1	207.17	203.06	212.18	357.89	155.98	141.35	46.71	323.78	194.4	280.86	134.95
ENSMMUG00000037231	0.915974	6.32702	1	1	15.26	7.58	30.31	0	51.99	0	0	0	24.3	0	0
ENSMMUG00000028034	0.489218	6.28059	1	1	20.45	8.43	0	102.26	0	0	0	0	0	0	33.74
ENSMMUG00000036297	0.489218	6.28059	1	1	20.45	8.43	0	102.26	0	0	0	0	0	0	33.74
ENSMMUG00000034447	0.477192	6.27294	1	1	15.58	7.58	30.31	0	0	0	46.71	0	0	31.21	0
ENSMMUG00000024064	0.476041	6.27037	1	1	15.42	7.07	0	51.13	26	28.27	0	0	0	0	0
ENSMMUG00000027582	0.474416	6.26951	1	1	14.54	7.07	0	0	26	28.27	46.71	0	0	0	0
ENSMMUG00000027794	0.473865	6.26938	1	1	15.09	7.07	0	51.13	0	28.27	0	0	24.3	0	0
ENSMMUG00000027809	0.471909	6.27044	1	1	14.54	7.58	30.31	0	26	0	46.71	0	0	0	0
ENSMMUG00000027619	0.466543	6.27865	1	1	16.47	11.56	0	51.13	0	0	0	46.25	0	31.21	0
ENSMMUG00000025345	0.465488	6.26495	1	1	11.44	7.07	0	0	26	28.27	0	0	0	31.21	0
ENSMMUG00000034792	0.460855	6.2649	1	1	11.1	7.58	30.31	0	0	0	0	0	24.3	31.21	0
ENSMMUG00000028316	0.460068	6.26247	1	1	10.4	7.07	0	0	51.99	28.27	0	0	0	0	0
ENSMMUG00000035086	0.457384	6.27431	1	1	14.2	11.56	0	0	0	0	46.71	46.25	24.3	0	0
ENSMMUG00000034238	0.457305	6.26626	1	1	11.1	8.43	0	0	0	0	0	0	24.3	31.21	33.74
ENSMMUG00000028150	0.448527	6.26974	1	1	11.1	11.56	0	0	0	0	0	46.25	24.3	31.21	0
ENSMMUG00000025303	0.443326	6.26725	1	1	10.06	11.56	0	0	26	0	0	46.25	24.3	0	0
ENSMMUG00000028503	-0.338655	6.58755	1	1	25.64	42.27	30.31	0	26	0	46.71	138.76	24.3	31.21	0
ENSMMUG00000036486	-0.32738	6.57758	1	1	22.88	37.26	0	0	51.99	56.54	0	92.51	0	62.41	0
ENSMMUG00000035614	-0.304356	6.45308	1	1	15.6	23.08	30.31	0	77.99	28.27	0	0	0	0	33.74
ENSMMUG00000027364	-0.303288	6.46374	1	1	19.4	27.07	0	0	26	28.27	46.71	46.25	24.3	0	33.74
ENSMMUG00000035907	-0.302818	6.58849	1	1	30.12	36.01	30.31	0	26	0	93.42	46.25	0	31.21	67.47
ENSMMUG00000033778	-0.300437	6.34215	1	1	11.44	23.13	0	0	26	0	0	92.51	0	31.21	0
ENSMMUG00000036855	-0.298933	6.58388	1	1	29.97	34.13	0	51.13	51.99	56.54	46.71	46.25	0	0	33.74
ENSMMUG00000028173	-0.29654	6.58579	1	1	30.67	34.3	90.94	51.13	0	0	46.71	46.25	24.3	31.21	0
ENSMMUG00000025183	-0.293671	6.45789	1	1	17.68	23.08	30.31	0	26	28.27	0	0	0	62.41	33.74
ENSMMUG00000034405	-0.290487	6.33297	1	1	10.06	18.63	0	0	26	28.27	0	46.25	24.3	0	0
ENSMMUG00000036043	-0.287502	6.33276	1	1	10.4	16.87	0	0	51.99	0	0	0	0	0	67.47
ENSMMUG00000026047	-0.287364	6.45904	1	1	19.74	22.57	0	0	51.99	56.54	46.71	0	0	0	33.74
ENSMMUG00000025942	-0.281204	6.33522	1	1	11.44	16.87	0	0	26	0	0	0	0	31.21	67.47
ENSMMUG00000026211	-0.281124	6.3272	1	1	9.72	14.65	30.31	0	0	28.27	0	0	48.6	0	0
ENSMMUG00000027617	-0.281124	6.3272	1	1	9.72	14.65	30.31	0	0	28.27	0	0	48.6	0	0
ENSMMUG00000024873	0.280692	6.82221	1	1	46.46	42.57	0	0	26	56.54	46.71	46.25	97.2	62.41	67.47
ENSMMUG00000028484	-0.277035	6.33197	1	1	11.1	15.5	0	0	0	28.27	0	0	24.3	31.21	33.74
ENSMMUG00000036957	-0.276991	6.34187	1	1	14.54	19.14	30.31	0	26	0	46.71	46.25	0	0	0
ENSMMUG00000025959	-0.276751	6.32915	1	1	10.4	14.65	30.31	0	51.99	28.27	0	0	0	0	0
ENSMMUG00000026693	-0.275247	6.34569	1	1	15.58	20	0	0	0	0	46.71	46.25	0	31.21	33.74
ENSMMUG00000028533	-0.274937	6.33295	1	1	11.44	15.5	0	0	26	28.27	0	0	0	31.21	33.74
ENSMMUG00000026269	-0.270192	6.3452	1	1	16.47	19.14	30.31	51.13	0	0	0	46.25	0	31.21	0
ENSMMUG00000026726	-0.266197	6.33748	1	1	14.54	15.5	0	0	26	28.27	46.71	0	0	0	33.74
ENSMMUG00000025477	-0.264923	6.33515	1	1	14.2	14.65	30.31	0	0	28.27	46.71	0	24.3	0	0
ENSMMUG00000037359	-0.257624	6.33859	1	1	15.58	14.65	30.31	0	0	28.27	46.71	0	0	31.21	0
ENSMMUG00000027853	-0.257212	6.34037	1	1	16.47	15.16	60.62	51.13	0	0	0	0	0	31.21	0
ENSMMUG00000025084	-0.242578	6.19946	1	1	4.86	11.56	0	0	0	0	0	46.25	24.3	0	0
ENSMMUG00000027444	-0.242578	6.19946	1	1	4.86	11.56	0	0	0	0	0	46.25	24.3	0	0
ENSMMUG00000037436	-0.242578	6.19946	1	1	4.86	11.56	0	0	0	0	0	46.25	24.3	0	0
ENSMMUG00000037430	-0.240332	6.20046	1	1	5.2	11.56	0	0	26	0	0	46.25	0	0	0
ENSMMUG00000027541	-0.233632	6.19596	1	1	4.86	8.43	0	0	0	0	0	0	24.3	0	33.74
ENSMMUG00000035850	-0.233632	6.19596	1	1	4.86	8.43	0	0	0	0	0	0	24.3	0	33.74
ENSMMUG00000035858	-0.2314	6.19696	1	1	5.2	8.43	0	0	26	0	0	0	0	0	33.74
ENSMMUG00000037043	-0.2314	6.19696	1	1	5.2	8.43	0	0	26	0	0	0	0	0	33.74
ENSMMUG00000025502	-0.230018	6.19459	1	1	4.86	7.58	30.31	0	0	0	0	0	24.3	0	0
ENSMMUG00000028175	-0.230018	6.19459	1	1	4.86	7.58	30.31	0	0	0	0	0	24.3	0	0
ENSMMUG00000033267	-0.230018	6.19459	1	1	4.86	7.58	30.31	0	0	0	0	0	24.3	0	0
ENSMMUG00000035786	-0.230018	6.19459	1	1	4.86	7.58	30.31	0	0	0	0	0	24.3	0	0
ENSMMUG00000025366	-0.227788	6.19559	1	1	5.2	7.58	30.31	0	26	0	0	0	0	0	0
ENSMMUG00000033322	-0.227788	6.19559	1	1	5.2	7.58	30.31	0	26	0	0	0	0	0	0
ENSMMUG00000027759	-0.227479	6.19365	1	1	4.86	7.07	0	0	0	28.27	0	0	24.3	0	0
ENSMMUG00000028111	-0.227479	6.19365	1	1	4.86	7.07	0	0	0	28.27	0	0	24.3	0	0
ENSMMUG00000033307	-0.225987	6.19947	1	1	6.24	8.43	0	0	0	0	0	0	0	31.21	33.74
ENSMMUG00000026223	-0.225614	6.20759	1	1	9.34	11.56	0	0	0	0	46.71	46.25	0	0	0
ENSMMUG00000034089	-0.225614	6.20759	1	1	9.34	11.56	0	0	0	0	46.71	46.25	0	0	0
ENSMMUG00000024768	-0.225249	6.19465	1	1	5.2	7.07	0	0	26	28.27	0	0	0	0	0
ENSMMUG00000028028	-0.225249	6.19465	1	1	5.2	7.07	0	0	26	28.27	0	0	0	0	0
ENSMMUG00000028483	-0.225249	6.19465	1	1	5.2	7.07	0	0	26	28.27	0	0	0	0	0
ENSMMUG00000027556	-0.223947	6.20845	1	1	10.23	11.56	0	51.13	0	0	0	46.25	0	0	0
ENSMMUG00000037280	-0.223947	6.20845	1	1	10.23	11.56	0	51.13	0	0	0	46.25	0	0	0
ENSMMUG00000027387	-0.222375	6.1981	1	1	6.24	7.58	30.31	0	0	0	0	0	0	31.21	0
ENSMMUG00000027826	-0.219836	6.19716	1	1	6.24	7.07	0	0	0	28.27	0	0	0	31.21	0
ENSMMUG00000028479	-0.219836	6.19716	1	1	6.24	7.07	0	0	0	28.27	0	0	0	31.21	0
ENSMMUG00000033195	-0.219836	6.19716	1	1	6.24	7.07	0	0	0	28.27	0	0	0	31.21	0
ENSMMUG00000028485	-0.216694	6.20407	1	1	9.34	8.43	0	0	0	0	46.71	0	0	0	33.74
ENSMMUG00000036994	-0.216694	6.20407	1	1	9.34	8.43	0	0	0	0	46.71	0	0	0	33.74
ENSMMUG00000026093	0.215654	6.90997	1	1	54.27	46.16	60.62	51.13	77.99	56.54	0	0	48.6	93.62	67.47
ENSMMUG00000027993	-0.213061	6.2027	1	1	9.34	7.58	30.31	0	0	0	46.71	0	0	0	0
ENSMMUG00000035208	-0.213061	6.2027	1	1	9.34	7.58	30.31	0	0	0	46.71	0	0	0	0
ENSMMUG00000024938	-0.21137	6.20356	1	1	10.23	7.58	30.31	51.13	0	0	0	0	0	0	0
ENSMMUG00000027530	-0.21137	6.20356	1	1	10.23	7.58	30.31	51.13	0	0	0	0	0	0	0
ENSMMUG00000037221	-0.21137	6.20356	1	1	10.23	7.58	30.31	51.13	0	0	0	0	0	0	0
ENSMMUG00000025278	0.211321	6.40641	1	1	24.77	15.16	60.62	51.13	26	0	46.71	0	0	0	0
ENSMMUG00000025751	-0.210503	6.20175	1	1	9.34	7.07	0	0	0	28.27	46.71	0	0	0	0
ENSMMUG00000036951	-0.210503	6.20175	1	1	9.34	7.07	0	0	0	28.27	46.71	0	0	0	0
ENSMMUG00000027822	-0.208805	6.20261	1	1	10.23	7.07	0	51.13	0	28.27	0	0	0	0	0
ENSMMUG00000025918	0.205397	6.67276	1	1	35	30.15	30.31	0	103.99	56.54	46.71	0	24.3	0	33.74
ENSMMUG00000027935	0.198432	6.40136	1	1	21.33	15.5	0	51.13	0	28.27	0	0	24.3	31.21	33.74
ENSMMUG00000035758	0.196616	7.44833	1	1	108.19	101.66	60.62	102.26	103.99	84.81	46.71	92.51	194.4	93.62	168.69
ENSMMUG00000027519	0.195155	6.40457	1	1	21.67	16.87	0	51.13	26	0	0	0	0	31.21	67.47
ENSMMUG00000035848	0.191783	6.90427	1	1	48.56	49.29	60.62	0	51.99	56.54	0	46.25	97.2	93.62	33.74
ENSMMUG00000034006	0.190826	6.40492	1	1	20.78	18.63	0	0	26	28.27	46.71	46.25	0	31.21	0
ENSMMUG00000024077	0.190365	6.6892	1	1	37.97	39.14	30.31	51.13	51.99	0	0	92.51	24.3	62.41	33.74
ENSMMUG00000035434	0.175455	6.4028	1	1	19.06	20	0	0	0	0	46.71	46.25	48.6	0	33.74
ENSMMUG00000025417	0.172998	6.40966	1	1	20.44	23.13	0	0	0	0	46.71	92.51	24.3	31.21	0
ENSMMUG00000034845	0.158335	6.4027	1	1	16.3	23.13	0	0	26	0	0	92.51	24.3	31.21	0
ENSMMUG00000024186	-0.142892	6.93823	1	1	58.58	64.49	90.94	102.26	26	28.27	46.71	138.76	24.3	93.62	0
ENSMMUG00000035511	0.12115	7.02374	1	1	68.27	70.19	0	102.26	129.98	28.27	46.71	185.01	0	62.41	67.47
ENSMMUG00000024975	-0.114681	7.34925	1	1	83.93	96.93	151.56	0	103.99	0	0	0	97.2	218.45	236.16
ENSMMUG00000035420	0.107127	7.00606	1	1	60.14	66.71	60.62	51.13	129.98	0	46.71	138.76	72.9	0	67.47
ENSMMUG00000027697	0.0797191	6.86992	1	1	52.01	45.47	181.87	102.26	77.99	0	0	0	48.6	31.21	0
ENSMMUG00000028327	0.0722902	6.52176	1	1	29.63	22.22	60.62	51.13	26	28.27	46.71	0	24.3	0	0
ENSMMUG00000024301	0.0618439	6.88585	1	1	57.04	52.37	0	153.38	51.99	28.27	0	46.25	48.6	31.21	134.95
ENSMMUG00000033951	0.0600391	8.33795	1	1	272.89	271.64	212.18	255.64	181.98	113.08	420.39	693.81	194.4	312.07	67.47
ENSMMUG00000032726	0.0592972	8.02973	1	1	189.09	196.23	121.25	51.13	337.96	226.16	233.55	370.03	291.6	31.21	67.47
ENSMMUG00000034414	0.0569837	6.87575	1	1	51.83	50.15	30.31	51.13	26	56.54	46.71	46.25	72.9	62.41	67.47
ENSMMUG00000024896	-0.0503921	6.62198	1	1	26.02	34.64	30.31	0	26	28.27	0	46.25	72.9	31.21	33.74
ENSMMUG00000025250	0.0482181	6.5178	1	1	25.14	25.7	0	51.13	26	56.54	0	46.25	48.6	0	0
ENSMMUG00000027338	-0.0457806	8.0047	1	1	197.02	194.58	242.49	255.64	155.98	169.62	233.55	231.27	121.5	218.45	134.95
ENSMMUG00000027463	-0.0438566	8.20329	1	1	237.53	242.39	90.94	255.64	155.98	226.16	373.68	416.28	121.5	280.86	236.16
ENSMMUG00000033713	0.0397994	7.6709	1	1	143.33	139.08	151.56	153.38	26	84.81	186.84	185.01	194.4	156.03	134.95
ENSMMUG00000024009	-0.0385869	6.74455	1	1	48.31	38.24	90.94	51.13	26	28.27	140.13	0	24.3	0	33.74
ENSMMUG00000028399	-0.0323674	7.45959	1	1	107.63	113.94	242.49	51.13	26	28.27	186.84	185.01	243	31.21	0
ENSMMUG00000025590	-0.0279566	7.04508	1	1	65.33	65.81	121.25	51.13	77.99	28.27	93.42	46.25	72.9	31.21	67.47
ENSMMUG00000032918	0.0273076	7.13384	1	1	63.48	70.49	60.62	0	77.99	141.35	0	46.25	145.8	93.62	33.74
ENSMMUG00000028180	-0.024142	6.63527	1	1	35.37	34.3	90.94	102.26	26	0	0	46.25	48.6	0	0
ENSMMUG00000035871	0.0238773	9.81653	1	1	822.43	823.91	909.35	357.89	987.87	1017.74	840.77	693.81	1020.6	905	674.74
ENSMMUG00000026741	-0.0185732	7.76235	1	1	146.8	158.06	90.94	153.38	233.97	141.35	93.42	231.27	97.2	156.03	168.69
ENSMMUG00000034623	0.0161059	7.222	1	1	79.07	80.8	90.94	102.26	77.99	84.81	0	46.25	121.5	93.62	101.21
ENSMMUG00000025503	0.015954	9.45321	1	1	609.42	619.51	909.35	255.64	883.88	735.03	280.26	462.54	972	655.34	371.11
ENSMMUG00000036785	-0.00920342	8.67892	1	1	332.09	338.93	515.3	306.77	649.91	339.25	186.84	231.27	267.3	249.65	269.9
ENSMMUG00000025672	0.00245785	10.4182	1	1	1297.1	1292.72	1394.34	1482.7	1455.81	1046.01	747.35	740.06	1239.3	1560.34	1990.49
ENSMMUG00000024499	0.00190258	12.7062	1	1	6621.34	6618.58	7396.07	6799.97	6993.08	4608.09	7193.26	6845.55	7533.02	4587.4	7624.59

## Sheet: I. DE_smallRNA_Grp4_Grp3
DE_smallRNA_Group4_vs_Group3_1
names	logFC	logCPM	PValue	FDR	Group4	Group3	Group4:1	Group3:6	Group3:8	Group4:12	Group3:5	Group4:16	Group4:23	Group3:25	Group4:28
ENSMMUG00000032962	1.56451	9.63639	0.000151153	0.0809185	999	321.03	640.32	252.66	205.62	1215.65	204.91	904.17	1468.16	620.94	766.73
ENSMMUG00000024424	1.33696	10.9355	0.00031469	0.0809185	2534.65	1012.84	1526.92	1162.23	1285.13	2937.81	450.81	1808.34	3588.83	1153.18	2811.35
ENSMMUG00000036436	1.02011	14.2482	0.000418544	0.0809185	25018.5	12353.2	31474.3	13138.2	17889.1	23249.2	9426.09	23551.4	30233.2	8959.32	16584.1
ENSMMUG00000033304	1.2539	10.1753	0.000729593	0.105791	1422.9	597.45	837.35	757.97	359.84	1950.1	532.78	947.22	1903.17	739.22	1476.67
ENSMMUG00000026180	1.11247	10.9946	0.0014511	0.142745	2545.24	1191.78	1674.69	1364.35	1336.54	4381.39	942.61	1937.5	2773.19	1123.61	1959.42
ENSMMUG00000035750	1.43228	8.65091	0.00147667	0.142745	447.03	164.39	344.79	151.59	205.62	354.56	122.95	473.61	380.63	177.41	681.54
ENSMMUG00000025719	1.04638	9.78151	0.00322098	0.241767	1026.23	485.43	591.07	404.25	411.24	1038.36	327.86	947.22	1305.03	798.36	1249.49
ENSMMUG00000025160	0.811263	12.8972	0.00343005	0.241767	9307.94	5310.07	6846.53	5204.75	5140.54	14081.2	4508.13	6845.84	10956.8	6386.84	7809.3
ENSMMUG00000024056	1.09545	12.1996	0.00375156	0.241767	6018.73	2827.57	3989.7	3183.49	2621.67	11827.2	2991.76	3875.01	6198.89	2513.34	4202.82
ENSMMUG00000036597	0.7967	11.628	0.00445579	0.258436	3787.93	2171.48	3053.85	1718.07	2107.62	4913.23	1844.23	2927.78	4921.05	3016.01	3123.72
ENSMMUG00000033208	0.760156	12.4337	0.00585401	0.297211	6640.2	3928.4	3595.66	4143.59	3444.16	8357.56	3483.55	5984.73	7993.3	4642.29	7269.74
ENSMMUG00000025361	0.837916	12.3387	0.00682194	0.297211	6312.29	3539.74	4383.75	3234.02	3752.59	10510.3	3032.74	4176.39	6470.77	4139.62	6020.26
ENSMMUG00000036232	0.967248	9.81261	0.00723987	0.297211	1033.3	541.07	788.09	505.32	514.05	1544.88	819.66	947.22	1005.96	325.26	880.32
ENSMMUG00000032901	1.00746	9.36499	0.00729983	0.297211	730.83	374.55	394.04	404.25	411.24	1038.36	327.86	688.89	652.51	354.82	880.32
ENSMMUG00000036590	1.14556	9.57025	0.00778614	0.297211	878.89	405.04	591.07	404.25	462.65	1722.16	368.85	602.78	598.14	384.39	880.32
ENSMMUG00000024826	-1.04458	8.82531	0.00866211	0.297211	269.41	557.49	246.28	656.91	719.68	227.93	409.83	430.56	271.88	443.53	170.38
ENSMMUG00000033222	-1.14036	8.44127	0.00871135	0.297211	174.78	410.07	197.02	404.25	359.84	202.61	491.8	0	190.32	384.39	283.97
ENSMMUG00000037192	0.68497	12.1801	0.0142011	0.457591	5462.74	3410.8	4285.24	3385.61	3444.16	9066.69	3442.57	4650.01	5165.74	3370.83	4146.03
ENSMMUG00000026727	2.38055	7.28152	0.0199047	0.607618	120.67	25.7	49.26	0	102.81	202.61	0	129.17	108.75	0	113.59
ENSMMUG00000037345	0.848235	10.2519	0.0226643	0.657264	1402.14	782.06	1280.65	859.04	719.68	2152.71	573.76	645.83	1767.23	975.77	1164.3
ENSMMUG00000024102	-1.45235	7.55117	0.0261661	0.709665	73.7	192.76	147.77	252.66	154.22	50.65	245.9	86.11	27.19	118.27	56.79
ENSMMUG00000026536	-0.652874	10.0753	0.0276806	0.709665	799.6	1272.82	837.35	1111.69	1285.13	1190.32	1393.42	516.67	516.57	1301.02	937.12
ENSMMUG00000025985	-1.31017	7.62757	0.0281419	0.709665	75.38	205.83	49.26	202.13	257.03	75.98	245.9	86.11	108.75	118.27	56.79
ENSMMUG00000026455	0.748593	11.1259	0.0311852	0.753643	2613.91	1576.1	2167.25	1667.54	2416.05	3849.54	860.64	2325	2881.94	1360.16	1845.83
ENSMMUG00000035551	0.906636	9.35832	0.0347121	0.80532	714.19	384.34	443.3	353.72	359.84	1164.99	409.83	559.72	380.63	413.96	1022.31
ENSMMUG00000027728	-3.66108	6.52427	0.0401147	0.86416	0	55.54	0	151.59	0	0	40.98	0	0	29.57	0
ENSMMUG00000036811	-1.94632	6.69827	0.0402281	0.86416	11.12	66.22	0	50.53	102.81	0	81.97	0	27.19	29.57	28.4
ENSMMUG00000024994	3.52555	6.63862	0.0425166	0.880701	55.83	0	197.02	0	0	25.33	0	0	0	0	56.79
ENSMMUG00000027733	-2.03363	6.92194	0.0491783	0.944495	23.53	99.34	49.26	101.06	102.81	25.33	163.93	43.06	0	29.57	0
ENSMMUG00000035932	-1.80873	6.98651	0.0514018	0.944495	22.72	95.57	0	101.06	51.41	0	81.97	0	0	147.84	113.59
ENSMMUG00000025802	0.776269	10.113	0.0530057	0.944495	1237.31	736.24	738.83	808.5	771.08	2254.01	655.73	818.06	1495.35	709.65	880.32
ENSMMUG00000026265	0.417522	13.1968	0.0532723	0.944495	10479.9	7840.05	9063.03	8893.55	6939.73	11903.2	5532.7	10419.5	11500.6	9994.23	9513.14
ENSMMUG00000025228	0.702799	11.4026	0.0537385	0.944495	3143.39	1947.77	2265.76	1970.73	2056.22	5900.94	2049.15	1722.22	3045.07	1714.99	2782.95
ENSMMUG00000026177	-0.739519	12.6116	0.0591315	0.96013	4791.14	7972.64	6304.72	4699.43	6785.51	2329.99	14344	6243.06	4676.35	6061.59	4401.6
ENSMMUG00000023916	-1.32469	7.07468	0.0616303	0.96013	32.98	101.28	0	101.06	51.41	25.33	163.93	0	54.38	88.71	85.19
ENSMMUG00000024647	0.745313	9.86356	0.062833	0.96013	1050.25	603.7	1379.16	555.85	257.03	1468.9	655.73	1076.39	815.64	946.2	511.15
ENSMMUG00000024242	1.05972	8.15162	0.0658814	0.96013	282.28	121.04	197.02	0	154.22	151.96	122.95	559.72	190.32	206.98	312.37
ENSMMUG00000027480	-0.721704	12.3442	0.0661288	0.96013	4000.38	6583.96	4482.26	7731.33	6322.86	1240.97	5983.52	5209.73	2963.5	6298.14	6105.45
ENSMMUG00000027479	0.390872	12.3268	0.0676107	0.96013	5641.4	4316.34	4531.51	3436.15	4523.67	6610.07	4958.94	4779.17	5328.87	4346.6	6957.37
ENSMMUG00000024318	-1.20598	8.15203	0.071421	0.96013	143.01	308.42	295.53	353.72	154.22	50.65	163.93	86.11	27.19	561.81	255.58
ENSMMUG00000035403	-0.781294	13.5174	0.0716205	0.96013	8856.72	15212.5	12609.4	26175.3	9304.38	4001.5	11680.1	8395.84	5220.11	13690.3	14056.7
ENSMMUG00000034621	-0.941913	7.91771	0.0724375	0.96013	122.38	244.4	147.77	101.06	359.84	101.3	368.85	86.11	163.13	147.84	113.59
ENSMMUG00000027383	-0.63929	12.3471	0.0731291	0.96013	4145.51	6431.35	5467.37	7832.39	6014.43	1772.82	5491.72	5425.01	2610.06	6386.84	5452.31
ENSMMUG00000023833	0.65312	10.0381	0.0744635	0.96013	1146.36	741.83	985.11	404.25	976.7	1570.21	1024.57	731.95	1223.46	561.81	1221.09
ENSMMUG00000025560	0.744298	10.2687	0.0755515	0.96013	1395.59	834.92	1231.39	808.5	719.68	2709.88	983.59	1162.5	1277.84	827.92	596.35
ENSMMUG00000026611	0.546557	11.546	0.0807664	0.96013	3367.09	2303.51	1822.46	2476.05	1490.76	4659.97	2172.1	3186.12	3588.83	3075.15	3578.08
ENSMMUG00000032852	1.50312	7.13129	0.0813857	0.96013	89.5	30.27	98.51	50.53	0	126.63	40.98	0	108.75	29.57	113.59
ENSMMUG00000037416	-3.34122	6.44879	0.0840036	0.96013	0	37.66	0	50.53	0	0	40.98	0	0	59.14	0
ENSMMUG00000028518	-3.00037	6.39038	0.0840396	0.96013	0	35.73	0	50.53	51.41	0	40.98	0	0	0	0
ENSMMUG00000024729	-1.25696	7.3676	0.0849752	0.96013	60.44	147.94	98.51	50.53	154.22	50.65	327.86	43.06	81.56	59.14	28.4
ENSMMUG00000025201	0.926558	8.11634	0.0893451	0.96013	255.7	134.12	197.02	101.06	205.62	278.59	81.97	301.39	217.5	147.84	283.97
ENSMMUG00000032720	1.00275	8.08996	0.0901322	0.96013	258.67	127.23	394.04	101.06	102.81	177.28	245.9	172.22	407.82	59.14	141.99
ENSMMUG00000027856	-0.641585	12.3596	0.092788	0.96013	4176.84	6501.16	5270.35	7781.86	6939.73	1443.58	5901.55	5468.06	2909.13	5381.51	5793.08
ENSMMUG00000027471	-0.626039	12.6198	0.0978149	0.96013	5040.96	7754.5	7585.36	9348.34	7196.75	1772.82	6844.16	5726.4	3588.83	7628.73	6531.41
ENSMMUG00000028479	1.9437	6.74771	0.0979083	0.96013	57.79	12.85	49.26	0	51.41	25.33	0	129.17	0	0	85.19
ENSMMUG00000026085	0.787267	9.28345	0.0979806	0.96013	654.75	371.33	197.02	353.72	205.62	810.43	245.9	645.83	598.14	680.08	1022.31
ENSMMUG00000036707	-0.345829	11.4603	0.100256	0.96013	2453.5	3126	2068.74	3890.93	2878.7	2431.29	2540.95	2970.84	2610.06	3193.42	2186.6
ENSMMUG00000025348	-1.31589	8.75981	0.104276	0.96013	221.03	574.41	98.51	353.72	1233.73	126.63	532.78	86.11	27.19	177.41	766.73
ENSMMUG00000027930	-0.602983	12.4335	0.105915	0.96013	4464.13	6759.05	6156.95	7630.26	7402.38	1494.23	5409.75	5511.12	3507.26	6593.83	5651.09
ENSMMUG00000034773	0.645167	12.1367	0.110059	0.96013	5243.09	3366.5	3891.19	3335.08	3906.81	11244.7	3237.66	3272.23	4513.22	2986.44	3294.1
ENSMMUG00000024693	-0.81589	8.0641	0.113024	0.96013	149.97	260.21	147.77	252.66	205.62	151.96	286.88	172.22	135.94	295.69	141.99
ENSMMUG00000032928	3.26701	6.5579	0.114241	0.96013	35.54	0	0	0	0	50.65	0	43.06	27.19	0	56.79
ENSMMUG00000032848	0.328577	12.309	0.115672	0.96013	5501.02	4383.29	6452.48	3840.4	5037.73	5419.75	4958.94	5123.62	6334.83	3696.09	4174.42
ENSMMUG00000026582	3.25348	6.55237	0.116394	0.96013	32.5	0	0	0	0	25.33	0	0	108.75	0	28.4
ENSMMUG00000024743	0.531978	11.5744	0.117175	0.96013	3421.54	2388.6	2906.08	2273.92	2981.51	5748.99	2377.01	1980.56	3887.9	1921.97	2584.17
ENSMMUG00000033134	1.25743	7.21234	0.117386	0.96013	100.54	35.03	49.26	0	51.41	75.98	0	129.17	163.13	88.71	85.19
ENSMMUG00000026110	-0.517758	10.0921	0.119026	0.96013	871.76	1216.17	985.11	808.5	1079.51	911.73	1557.35	1119.45	462.2	1419.3	880.32
ENSMMUG00000026160	0.35498	12.9591	0.119771	0.96013	8721.03	6828.73	7930.15	6114.32	7093.94	12814.9	6803.18	7233.34	8754.57	7303.47	6872.18
ENSMMUG00000035871	0.532628	9.69132	0.12173	0.96013	868.9	599.41	788.09	404.25	873.89	1063.69	409.83	947.22	1005.96	709.65	539.55
ENSMMUG00000024902	0.364591	11.7446	0.12674	0.96013	3707.21	2903.16	2906.08	2678.17	3135.73	3292.37	3196.67	3143.06	5247.3	2602.05	3947.24
ENSMMUG00000025832	-0.350715	11.5694	0.128103	0.96013	2642.88	3369.69	2709.06	2829.77	3187.13	3241.72	3647.49	2152.78	3208.2	3814.37	1902.63
ENSMMUG00000026639	-0.902163	7.59098	0.128609	0.96013	83.18	161.33	0	101.06	102.81	50.65	204.91	86.11	108.75	236.55	170.38
ENSMMUG00000028145	-0.975466	7.5741	0.129417	0.96013	85.7	160.87	49.26	151.59	102.81	25.33	122.95	129.17	54.38	266.12	170.38
ENSMMUG00000024323	-0.489639	12.6937	0.131094	0.96013	5572.15	7823.14	5910.67	4648.9	11052.2	4330.74	10860.5	6888.9	5192.93	4731	5537.5
ENSMMUG00000025398	1.00606	7.78019	0.131933	0.96013	179.57	88.64	147.77	50.53	51.41	329.24	163.93	86.11	135.94	88.71	198.78
ENSMMUG00000024262	-0.890266	7.84075	0.132473	0.96013	115.83	209.18	147.77	50.53	308.43	177.28	122.95	86.11	54.38	354.82	113.59
ENSMMUG00000028451	-1.70637	6.82472	0.134008	0.96013	23.53	84.31	49.26	101.06	154.22	25.33	81.97	43.06	0	0	0
ENSMMUG00000028170	-0.575484	12.3256	0.135271	0.96013	4179.67	6212.58	5418.12	7882.92	5860.21	1367.6	5163.86	5080.56	3153.82	5943.31	5878.27
ENSMMUG00000027331	-1.35482	6.85703	0.135332	0.96013	24.79	76.68	0	0	154.22	25.33	122.95	43.06	27.19	29.57	28.4
ENSMMUG00000034442	-0.525967	11.0617	0.139814	0.96013	1745.14	2506.65	2364.27	3436.15	2364.65	785.1	2008.17	1550	1413.78	2217.65	2612.56
ENSMMUG00000033230	0.390134	11.5416	0.14163	0.96013	3225.5	2473.57	2265.76	2324.45	2313.24	4811.93	2418	2540.28	3045.07	2838.6	3464.49
ENSMMUG00000036486	-2.08074	6.52154	0.142828	0.96013	5.68	45.98	0	50.53	51.41	0	81.97	0	0	0	28.4
ENSMMUG00000026241	-1.691	6.63443	0.143709	0.96013	11.12	50.76	0	50.53	0	0	122.95	0	27.19	29.57	28.4
ENSMMUG00000033750	1.02428	7.42436	0.144013	0.96013	127.07	55.52	147.77	0	51.41	151.96	81.97	86.11	135.94	88.71	113.59
ENSMMUG00000024706	-0.842152	8.63167	0.14423	0.96013	247.09	446.25	147.77	505.32	462.65	50.65	491.8	387.5	81.56	325.26	567.95
ENSMMUG00000024807	-2.34222	6.57215	0.14466	0.96013	5.44	47.88	0	0	102.81	0	0	0	27.19	88.71	0
ENSMMUG00000037231	-2.10239	6.52463	0.144869	0.96013	5.07	50.97	0	101.06	102.81	25.33	0	0	0	0	0
ENSMMUG00000028178	-0.797247	7.94959	0.145675	0.96013	129.33	240.39	98.51	252.66	308.43	101.3	163.93	86.11	190.32	236.55	170.38
ENSMMUG00000027752	-0.579827	12.4256	0.150575	0.963536	4475.25	6673.23	5959.93	8539.83	6220.05	1468.9	5368.77	5338.9	2963.5	6564.26	6645
ENSMMUG00000033987	0.44894	9.9077	0.152147	0.963536	993.64	723.28	689.58	757.97	462.65	1190.32	696.71	904.17	1332.22	975.77	851.92
ENSMMUG00000035420	-1.27462	6.9499	0.155087	0.963536	27.54	88.88	0	151.59	51.41	25.33	122.95	0	27.19	29.57	85.19
ENSMMUG00000025611	0.869769	10.326	0.155557	0.963536	1475.64	795.5	640.32	808.5	205.62	2329.99	245.9	1076.39	1712.85	1921.97	1618.65
ENSMMUG00000035511	-1.37318	7.34629	0.156125	0.963536	53.78	136.1	98.51	50.53	0	0	286.88	0	0	206.98	170.38
ENSMMUG00000034870	-0.949057	7.78171	0.156777	0.963536	114.85	196.14	98.51	151.59	102.81	50.65	204.91	258.33	81.56	325.26	85.19
ENSMMUG00000024869	0.445047	13.4473	0.157916	0.963536	12565.1	9226.82	12560.2	10813.8	6014.43	20564.7	8606.43	8309.73	10684.9	11472.7	10705.8
ENSMMUG00000033951	-0.677968	8.47865	0.160384	0.963536	231.25	359.82	295.53	252.66	205.62	227.93	655.73	215.28	190.32	325.26	227.18
ENSMMUG00000027495	-0.583324	12.4361	0.163691	0.963536	4502.06	6728.18	5664.39	7175.48	7196.75	1215.65	5532.7	6027.79	3099.44	7007.79	6503.01
ENSMMUG00000027377	-0.536381	12.4133	0.163981	0.963536	4512.56	6523.04	6353.97	7276.54	6836.92	1443.58	5532.7	5597.23	3289.76	6445.98	5878.27
ENSMMUG00000028374	-0.91929	7.53126	0.164466	0.963536	79.35	170.74	49.26	101.06	411.24	25.33	81.97	43.06	108.75	88.71	170.38
ENSMMUG00000024986	1.60323	6.9153	0.17102	0.991285	65.31	14.78	49.26	0	0	25.33	0	0	81.56	59.14	170.38
ENSMMUG00000034628	-0.565997	14.0013	0.17262	0.991285	13486.7	19943.4	21081.4	25872.2	17477.8	4178.78	17499.7	16145.9	8591.44	18924	17436
ENSMMUG00000036503	-0.424837	16.1426	0.177473	1	62754	84223.6	74770	48762.9	91758.6	35228.4	123072	68027.9	62478.2	73300.9	73265.4
ENSMMUG00000037181	-0.804415	7.67154	0.180127	1	94.8	171.11	98.51	151.59	102.81	151.96	163.93	0	81.56	266.12	141.99
ENSMMUG00000025445	-2.97039	6.37936	0.182712	1	0	27.64	0	0	51.41	0	0	0	0	59.14	0
ENSMMUG00000025102	0.386507	16.6285	0.198665	1	113043	86486.1	96393.2	72411.7	104456	191464	70080.9	84001.5	111172	98996.1	82182.2
ENSMMUG00000036855	-2.05295	6.72797	0.199656	1	11.36	54.6	0	0	0	0	40.98	0	0	177.41	56.79
ENSMMUG00000025597	2.76363	6.44008	0.199682	1	26.03	0	49.26	0	0	25.33	0	0	27.19	0	28.4
ENSMMUG00000033267	2.76363	6.44008	0.199682	1	26.03	0	49.26	0	0	25.33	0	0	27.19	0	28.4
ENSMMUG00000028237	2.77816	6.44792	0.200074	1	29.82	0	49.26	0	0	0	0	43.06	0	0	56.79
ENSMMUG00000027786	0.389672	9.73068	0.200309	1	863.65	642.22	640.32	505.32	514.05	1038.36	573.76	947.22	897.21	975.77	795.13
ENSMMUG00000027769	-0.52895	12.4245	0.202836	1	4560.61	6560.44	6550.99	7226.01	6734.11	1215.65	5983.52	5726.4	3289.76	6298.14	6020.26
ENSMMUG00000037409	-0.999642	7.28401	0.209375	1	62.61	116.53	49.26	50.53	51.41	50.65	245.9	129.17	27.19	118.27	56.79
ENSMMUG00000026614	0.493054	9.06643	0.209705	1	522.23	371.52	394.04	404.25	205.62	785.1	491.8	516.67	489.39	384.39	425.96
ENSMMUG00000035614	-1.14037	6.80443	0.211611	1	25.04	66	0	101.06	51.41	25.33	81.97	43.06	0	29.57	56.79
ENSMMUG00000032751	0.438393	10.8174	0.212459	1	1935.18	1443.78	1132.88	1162.23	1747.78	2988.46	1475.39	1722.22	2582.87	1389.73	1249.49
ENSMMUG00000026432	-0.841401	7.51398	0.213564	1	81.3	151.54	49.26	151.59	154.22	75.98	122.95	86.11	81.56	177.41	113.59
ENSMMUG00000024011	-1.64165	6.80298	0.214111	1	24.14	65.52	49.26	0	102.81	0	40.98	43.06	0	118.27	28.4
ENSMMUG00000023917	-1.33025	6.83943	0.214181	1	21.86	67.69	0	101.06	51.41	25.33	0	0	27.19	118.27	56.79
ENSMMUG00000025173	-0.694903	9.55287	0.216836	1	552.56	866.32	1329.9	1010.63	411.24	303.91	860.64	258.33	217.5	1182.75	653.14
ENSMMUG00000026059	0.577446	9.73593	0.228718	1	886.54	598.66	344.79	707.44	205.62	1595.53	860.64	688.89	951.58	620.94	851.92
ENSMMUG00000036730	-0.713411	8.40572	0.230614	1	213.95	347.58	197.02	151.59	462.65	25.33	450.81	258.33	163.13	325.26	425.96
ENSMMUG00000034323	0.438449	12.3282	0.231472	1	5723.65	4196.69	4433	2627.64	2981.51	5748.99	2868.81	5597.23	6307.64	8308.81	6531.41
ENSMMUG00000027600	-0.411048	12.137	0.231545	1	3889.92	5157.76	5319.6	5558.47	5500.38	1620.86	5491.72	4262.51	2936.31	4080.48	5310.32
ENSMMUG00000027547	-0.464303	12.4154	0.232482	1	4638.63	6378.89	6058.44	7226.01	5654.59	1595.53	6721.21	6243.06	2963.5	5913.74	6332.63
ENSMMUG00000025111	0.398504	10.2398	0.234172	1	1250.07	956.71	935.86	909.57	873.89	1494.23	860.64	645.83	1413.78	1182.75	1760.64
ENSMMUG00000024365	-0.530335	8.83931	0.23424	1	314.8	459.93	197.02	454.78	411.24	379.89	204.91	215.28	299.07	768.79	482.76
ENSMMUG00000035086	1.36687	6.84193	0.235454	1	65.46	14.78	147.77	0	0	25.33	0	43.06	54.38	59.14	56.79
ENSMMUG00000033170	1.33411	6.83438	0.235738	1	57.96	17.64	0	0	0	50.65	40.98	129.17	81.56	29.57	28.4
ENSMMUG00000034854	-0.883972	8.18442	0.238025	1	163.58	307	246.28	757.97	51.41	50.65	122.95	43.06	108.75	295.69	369.17
ENSMMUG00000028536	-0.505397	11.8009	0.239129	1	2964.65	4202.19	3103.1	3284.55	5654.59	683.8	4262.23	4004.17	3425.7	3607.38	3606.47
ENSMMUG00000026673	0.459558	9.81719	0.241615	1	927.86	672.05	640.32	757.97	462.65	1671.51	491.8	861.11	870.02	975.77	596.35
ENSMMUG00000032815	0.329721	10.4769	0.241769	1	1481.21	1188.78	1182.13	909.57	1644.97	1747.49	1106.54	1808.34	1305.03	1094.04	1363.08
ENSMMUG00000036758	-0.460954	8.92314	0.242546	1	360.8	493.62	541.81	353.72	719.68	379.89	368.85	215.28	326.26	532.24	340.77
ENSMMUG00000024487	-0.353737	10.2823	0.243145	1	1050.83	1352.19	837.35	1869.67	1233.73	734.45	1270.47	1420.84	870.02	1034.91	1391.47
ENSMMUG00000026185	0.953821	7.53996	0.244382	1	135.39	73.17	49.26	151.59	0	278.59	81.97	129.17	163.13	59.14	56.79
ENSMMUG00000024003	-0.386879	12.6607	0.244439	1	5637.03	7391.05	4186.73	9702.06	9304.38	8028.32	3934.37	7276.4	4377.28	6623.39	4316.41
ENSMMUG00000024846	0.322132	15.4069	0.255157	1	47584.5	38099.2	36843.2	39970.5	45185.3	75699.2	39712.5	33497.3	47497.6	27528.5	44385.2
ENSMMUG00000032760	-0.305197	15.253	0.257492	1	35308.9	43593.7	38616.4	31076.9	38811.1	29758	64835.1	48179.2	27106.5	39651.7	32884.2
ENSMMUG00000033176	0.477425	9.07406	0.261716	1	520.81	363.97	246.28	404.25	102.81	633.15	327.86	559.72	625.33	620.94	539.55
ENSMMUG00000024186	-0.976957	7.10095	0.26187	1	50.18	101.95	98.51	101.06	154.22	25.33	122.95	43.06	27.19	29.57	56.79
ENSMMUG00000024283	0.204178	11.8963	0.263134	1	3975.08	3430.79	3546.4	3132.96	3032.92	4077.48	3565.52	4219.45	4567.6	3991.78	3464.49
ENSMMUG00000025590	-1.15345	7.04341	0.263696	1	41.18	91.03	49.26	101.06	51.41	0	122.95	43.06	0	88.71	113.59
ENSMMUG00000034238	-2.04473	6.50822	0.264413	1	5.68	35.28	0	0	0	0	81.97	0	0	59.14	28.4
ENSMMUG00000026037	0.375907	10.6799	0.26486	1	1724.88	1351.78	1526.92	1263.29	1644.97	1975.42	1434.4	904.17	1576.91	1064.47	2640.96
ENSMMUG00000024400	1.60152	6.94847	0.265509	1	76.65	25.27	0	101.06	0	0	0	215.28	54.38	0	113.59
ENSMMUG00000025184	-1.38985	6.57085	0.265789	1	11.12	38.13	0	0	0	0	122.95	0	27.19	29.57	28.4
ENSMMUG00000033822	-1.06575	6.51762	0.268754	1	10.74	38.55	0	0	154.22	25.33	0	0	0	0	28.4
ENSMMUG00000028134	-0.432369	12.267	0.269144	1	4227.76	5689.55	5171.84	5659.53	6425.67	1494.23	5409.75	5726.4	2555.68	5263.23	6190.64
ENSMMUG00000024535	-0.443609	8.53103	0.279397	1	251.74	351.02	197.02	404.25	205.62	253.26	409.83	172.22	380.63	384.39	255.58
ENSMMUG00000026474	-0.192768	16.3742	0.282578	1	79802.9	91247.4	73981.9	82770.7	117770	91249.4	90941.2	86498.7	73706.9	73507.9	73577.8
ENSMMUG00000033896	0.516605	7.87962	0.284128	1	191.99	120.38	147.77	151.59	0	177.28	122.95	301.39	163.13	206.98	170.38
ENSMMUG00000026127	0.226585	12.4042	0.286135	1	5722.91	4861.66	5615.14	4497.31	4163.84	6584.75	4221.25	5597.23	4513.22	6564.26	6304.23
ENSMMUG00000025711	1.04678	7.16492	0.286723	1	95.2	48.8	98.51	0	154.22	0	40.98	129.17	163.13	0	85.19
ENSMMUG00000027324	0.216564	12.5854	0.288264	1	6459.47	5582.35	5171.84	5710.07	5294.76	5622.36	6475.31	6415.29	6824.21	4849.27	8263.66
ENSMMUG00000036683	-0.381647	9.24438	0.289962	1	483.29	615.42	591.07	505.32	668.27	278.59	696.71	516.67	462.2	591.37	567.95
ENSMMUG00000027861	-0.413318	12.4475	0.292696	1	4825.07	6413.32	5812.16	7428.14	6734.11	1646.19	4631.08	5855.56	3371.32	6859.94	7440.13
ENSMMUG00000024125	-0.478926	8.34547	0.297714	1	216.92	303.3	344.79	252.66	359.84	253.26	245.9	43.06	244.69	354.82	198.78
ENSMMUG00000037214	0.412351	9.35696	0.299716	1	638.28	482.5	492.56	303.19	514.05	1063.69	491.8	387.5	679.7	620.94	567.95
ENSMMUG00000028360	0.970468	7.10871	0.307391	1	84.22	40.05	0	101.06	0	25.33	0	172.22	81.56	59.14	141.99
ENSMMUG00000032834	0.972996	8.04262	0.310657	1	221.58	119.09	49.26	101.06	257.03	557.17	0	0	217.5	118.27	283.97
ENSMMUG00000027425	-1.69339	6.63398	0.310864	1	10.88	50.98	0	0	51.41	0	122.95	0	54.38	29.57	0
ENSMMUG00000028180	-1.39728	6.58355	0.311487	1	14.29	43.59	0	0	51.41	0	122.95	43.06	0	0	28.4
ENSMMUG00000033863	0.354699	10.3009	0.320389	1	1292.96	1040.68	1034.37	1162.23	1079.51	1747.49	1270.47	775	1658.47	650.51	1249.49
ENSMMUG00000026741	-0.641433	7.94592	0.324946	1	141.82	233.05	49.26	454.78	154.22	50.65	204.91	215.28	81.56	118.27	312.37
ENSMMUG00000027969	1.18035	6.78798	0.334963	1	53.76	17.64	49.26	0	0	50.65	40.98	86.11	54.38	29.57	28.4
ENSMMUG00000035313	-1.09902	6.78694	0.335878	1	24.79	52.45	0	50.53	0	25.33	40.98	43.06	27.19	118.27	28.4
ENSMMUG00000025419	1.16932	6.78079	0.336847	1	49.34	17.64	0	0	0	50.65	40.98	86.11	81.56	29.57	28.4
ENSMMUG00000027431	1.16562	6.78423	0.337135	1	49.83	20.03	0	50.53	0	50.65	0	86.11	27.19	29.57	85.19
ENSMMUG00000025345	-1.4709	6.75192	0.338898	1	20.73	62.93	49.26	151.59	0	0	40.98	0	54.38	59.14	0
ENSMMUG00000036270	-0.417822	8.85921	0.340668	1	350.53	477.19	295.53	656.91	616.86	227.93	368.85	559.72	271.88	266.12	397.56
ENSMMUG00000027821	-0.54042	9.23705	0.340893	1	463.13	658.89	886.6	1061.16	514.05	126.63	409.83	430.56	190.32	650.51	681.54
ENSMMUG00000035848	1.02005	6.73162	0.341542	1	47.33	14.78	49.26	0	0	101.3	0	86.11	0	59.14	0
ENSMMUG00000025148	0.644115	8.06982	0.344244	1	239.67	152.71	246.28	151.59	154.22	101.3	245.9	344.44	108.75	59.14	397.56
ENSMMUG00000028449	0.26266	11.2964	0.344867	1	2615.37	2213.61	2413.52	2374.98	2364.65	3444.33	2458.98	1679.17	2501.3	1655.85	3038.53
ENSMMUG00000023953	0.539295	7.82623	0.345666	1	190.75	116.06	394.04	101.06	51.41	126.63	163.93	129.17	190.32	147.84	113.59
ENSMMUG00000036297	-0.916564	6.74591	0.351283	1	22.72	55.54	0	151.59	0	0	40.98	0	0	29.57	113.59
ENSMMUG00000026317	2.41716	6.37383	0.351444	1	19.11	0	0	0	0	25.33	0	43.06	27.19	0	0
ENSMMUG00000025206	2.43439	6.38324	0.351462	1	24.14	0	49.26	0	0	0	0	43.06	0	0	28.4
ENSMMUG00000027987	2.43313	6.38258	0.351469	1	23.9	0	49.26	0	0	0	0	43.06	27.19	0	0
ENSMMUG00000028377	2.75988	6.43796	0.351532	1	24.55	0	0	0	0	25.33	0	43.06	54.38	0	0
ENSMMUG00000028030	2.42206	6.37624	0.351936	1	19.97	0	0	0	0	0	0	43.06	0	0	56.79
ENSMMUG00000026347	2.42474	6.37773	0.35197	1	21.21	0	49.26	0	0	0	0	0	0	0	56.79
ENSMMUG00000025312	2.43186	6.38109	0.352354	1	22.66	0	0	0	0	0	0	86.11	27.19	0	0
ENSMMUG00000037056	2.75349	6.43491	0.352677	1	22.48	0	0	0	0	0	0	0	27.19	0	85.19
ENSMMUG00000025382	-1.12269	6.82035	0.353206	1	32.75	68.61	49.26	101.06	102.81	0	40.98	86.11	0	29.57	28.4
ENSMMUG00000033587	0.323502	10.0557	0.354166	1	1078.19	878.94	738.83	1061.16	925.3	709.13	819.66	1162.5	1332.22	709.65	1448.27
ENSMMUG00000028533	1.5531	6.62607	0.355401	1	39.71	10.25	49.26	0	0	50.65	40.98	43.06	27.19	0	28.4
ENSMMUG00000026254	1.32776	6.57287	0.356187	1	35.26	10.25	49.26	0	0	0	40.98	43.06	27.19	0	56.79
ENSMMUG00000026410	-0.621147	7.90283	0.361312	1	142.16	204.46	147.77	151.59	154.22	126.63	245.9	215.28	135.94	266.12	85.19
ENSMMUG00000025344	-0.87377	6.86386	0.365954	1	34.02	71.43	0	50.53	205.62	0	0	86.11	27.19	29.57	56.79
ENSMMUG00000024366	0.528537	7.97429	0.366808	1	207.36	138.91	246.28	101.06	154.22	126.63	122.95	129.17	108.75	177.41	425.96
ENSMMUG00000028123	-1.0597	6.91764	0.37023	1	36.95	79.07	0	50.53	154.22	0	81.97	129.17	27.19	29.57	28.4
ENSMMUG00000033012	-0.648835	7.07537	0.370245	1	46.66	86.03	0	151.59	51.41	50.65	81.97	43.06	54.38	59.14	85.19
ENSMMUG00000024815	-0.845319	7.03988	0.37413	1	41.23	91.7	49.26	101.06	154.22	101.3	81.97	0	27.19	29.57	28.4
ENSMMUG00000026130	0.273449	9.96928	0.376389	1	1008.34	817.87	1083.62	808.5	462.65	1063.69	1024.57	904.17	1223.46	975.77	766.73
ENSMMUG00000032918	0.776507	7.45069	0.377113	1	119.63	70.54	147.77	101.06	51.41	177.28	40.98	0	244.69	88.71	28.4
ENSMMUG00000035047	0.669128	7.52528	0.380138	1	127.71	86.03	49.26	151.59	51.41	126.63	81.97	129.17	163.13	59.14	170.38
ENSMMUG00000036830	-0.352359	9.26976	0.383488	1	496.33	609.55	492.56	505.32	565.46	227.93	450.81	645.83	462.2	916.63	653.14
ENSMMUG00000024851	0.313599	10.4401	0.384884	1	1425.05	1147.91	985.11	1212.76	771.08	2203.36	1188.51	1291.67	1821.6	1419.3	823.53
ENSMMUG00000036337	-0.436147	10.3411	0.384984	1	1074.3	1452.68	1329.9	454.78	2467.46	557.17	2090.13	1162.5	788.45	798.36	1533.46
ENSMMUG00000025809	-0.505742	7.77959	0.38615	1	118.61	176.35	0	202.13	102.81	75.98	163.93	129.17	217.5	236.55	170.38
ENSMMUG00000035976	-0.600965	8.19054	0.387145	1	200.54	291.63	591.07	505.32	308.43	75.98	204.91	86.11	135.94	147.84	113.59
ENSMMUG00000024665	0.466046	8.07069	0.390388	1	221.8	151.56	147.77	50.53	102.81	202.61	245.9	258.33	244.69	206.98	255.58
ENSMMUG00000025983	-0.464829	7.95312	0.393033	1	146.62	221.57	147.77	252.66	205.62	151.96	368.85	43.06	163.13	59.14	227.18
ENSMMUG00000023932	0.342929	9.31642	0.397281	1	620.08	481.78	788.09	353.72	565.46	911.73	327.86	344.44	516.57	680.08	539.55
ENSMMUG00000037310	-0.263548	10.2926	0.399448	1	1097.21	1306.54	1280.65	1667.54	1028.11	734.45	1229.49	1119.45	761.27	1301.02	1590.26
ENSMMUG00000026505	-2.47774	6.30828	0.400287	1	0	17.64	0	0	0	0	40.98	0	0	29.57	0
ENSMMUG00000036495	-2.47774	6.30828	0.400287	1	0	17.64	0	0	0	0	40.98	0	0	29.57	0
ENSMMUG00000024133	-2.49655	6.315	0.40033	1	0	22.88	0	50.53	0	0	40.98	0	0	0	0
ENSMMUG00000035645	0.287699	9.71345	0.410995	1	822.42	689.92	689.58	505.32	925.3	861.08	737.69	731.95	1005.96	591.37	823.53
ENSMMUG00000033865	-0.356663	9.20579	0.413487	1	473.73	584.21	492.56	303.19	668.27	253.26	655.73	645.83	380.63	709.65	596.35
ENSMMUG00000026062	0.228932	10.57	0.41741	1	1548.38	1324.39	1428.41	1010.63	1542.16	1215.65	1680.3	1722.22	1359.4	1064.47	2016.22
ENSMMUG00000024462	-0.357681	10.008	0.418023	1	877.87	1095.03	1379.16	1515.95	668.27	354.56	983.59	1205.56	598.14	1212.32	851.92
ENSMMUG00000026204	0.308802	10.8448	0.426075	1	1906.01	1558.23	1280.65	1515.95	1542.16	3646.94	1844.23	1248.61	1848.79	1330.59	1505.06
ENSMMUG00000034680	-0.427301	9.1783	0.429828	1	452.65	604.41	591.07	505.32	719.68	75.98	778.68	473.61	299.07	413.96	823.53
ENSMMUG00000035738	0.46925	7.99331	0.432236	1	202.47	138.46	147.77	50.53	102.81	329.24	163.93	172.22	135.94	236.55	227.18
ENSMMUG00000025857	-0.352358	8.46582	0.443733	1	252.82	330.42	197.02	252.66	411.24	303.91	450.81	344.44	163.13	206.98	255.58
ENSMMUG00000026025	-0.2923	9.63617	0.452168	1	672.08	813.11	689.58	707.44	1079.51	379.89	696.71	947.22	435.01	768.79	908.72
ENSMMUG00000027434	0.626762	7.28108	0.465057	1	104.93	65.75	197.02	101.06	102.81	75.98	0	86.11	108.75	59.14	56.79
ENSMMUG00000024646	0.717477	7.29626	0.46619	1	102.01	57.91	49.26	50.53	51.41	25.33	40.98	129.17	135.94	88.71	170.38
ENSMMUG00000034384	-0.367109	10.3582	0.474336	1	1124.66	1420.31	2512.04	1364.35	873.89	379.89	1639.32	775	706.89	1803.69	1249.49
ENSMMUG00000028397	-1.68902	6.45617	0.477096	1	8.61	32.88	0	50.53	51.41	0	0	43.06	0	29.57	0
ENSMMUG00000027582	-1.6843	6.44217	0.477491	1	5.07	27.42	0	50.53	0	25.33	0	0	0	59.14	0
ENSMMUG00000034977	-1.66697	6.45085	0.477638	1	9.85	27.42	49.26	50.53	0	0	0	0	0	59.14	0
ENSMMUG00000033244	0.99818	6.73806	0.477941	1	46.38	20.03	49.26	50.53	0	0	0	43.06	54.38	29.57	85.19
ENSMMUG00000033542	0.984357	6.7302	0.478346	1	42.46	20.03	49.26	50.53	0	50.65	0	0	27.19	29.57	85.19
tRNA-Arg-TCG-2-1	0.830077	6.68579	0.479544	1	44.74	14.78	98.51	0	0	25.33	0	43.06	0	59.14	56.79
ENSMMUG00000037073	-0.395241	8.26854	0.483844	1	196.49	266.44	49.26	252.66	205.62	455.87	163.93	172.22	163.13	443.53	141.99
ENSMMUG00000025862	-0.211789	10.9681	0.486031	1	1825.23	2087.15	2758.31	1667.54	2159.03	2051.4	2540.95	1679.17	1359.4	1981.1	1277.88
ENSMMUG00000024421	-0.527745	7.59708	0.492239	1	103.47	143.26	98.51	202.13	0	177.28	163.93	129.17	27.19	206.98	85.19
ENSMMUG00000034623	-0.619819	7.31253	0.497499	1	72.65	108.64	98.51	50.53	154.22	25.33	81.97	43.06	54.38	147.84	141.99
ENSMMUG00000036639	0.483687	6.8882	0.497591	1	57.16	29.57	0	0	0	0	0	172.22	0	118.27	113.59
ENSMMUG00000032726	0.420647	8.18967	0.503475	1	239.41	182.03	147.77	151.59	205.62	101.3	163.93	172.22	435.01	206.98	340.77
ENSMMUG00000024828	-1.03356	6.52147	0.504594	1	14.05	35.73	0	50.53	51.41	0	40.98	43.06	27.19	0	0
ENSMMUG00000033108	-0.115076	14.1673	0.504611	1	17672.9	19147.6	16155.8	15968	20973.4	21780.3	19630.8	17954.2	18161.7	20018	14312.3
ENSMMUG00000028453	-1.04516	6.51586	0.505965	1	11.12	35.51	0	101.06	0	0	40.98	0	27.19	0	28.4
ENSMMUG00000025271	-1.35708	6.57234	0.506088	1	15.53	35.03	49.26	0	51.41	0	0	0	0	88.71	28.4
ENSMMUG00000036957	-1.34585	6.57771	0.506154	1	18.46	35.03	49.26	0	51.41	0	0	43.06	0	88.71	0
ENSMMUG00000025613	-0.919519	6.61469	0.50805	1	15.2	32.42	0	0	0	75.98	40.98	0	0	88.71	0
ENSMMUG00000027338	-0.375255	8.29781	0.5081	1	220.51	274.56	295.53	353.72	102.81	101.3	286.88	172.22	135.94	354.82	397.56
ENSMMUG00000026811	-0.761741	7.1337	0.510536	1	58.4	91.25	49.26	50.53	102.81	0	122.95	129.17	0	88.71	113.59
ENSMMUG00000025046	-0.476636	7.50675	0.511824	1	89.5	136.29	49.26	202.13	154.22	25.33	40.98	43.06	244.69	147.84	85.19
ENSMMUG00000035606	-0.630951	7.07779	0.513921	1	50.72	83.39	49.26	101.06	102.81	25.33	40.98	43.06	135.94	88.71	0
ENSMMUG00000035888	-0.9267	6.64426	0.514536	1	23.9	43.12	49.26	50.53	51.41	0	40.98	43.06	27.19	29.57	0
ENSMMUG00000034081	-0.359747	8.36244	0.514847	1	239.67	290.48	295.53	303.19	205.62	253.26	327.86	344.44	163.13	325.26	141.99
ENSMMUG00000034836	-0.518877	7.30424	0.51511	1	78.89	116.72	98.51	202.13	205.62	0	0	129.17	81.56	59.14	85.19
ENSMMUG00000027767	-0.747238	7.18331	0.515368	1	54.32	90.33	49.26	50.53	51.41	0	81.97	0	108.75	177.41	113.59
ENSMMUG00000024746	-0.861041	6.73779	0.515761	1	25.41	45.06	0	50.53	0	0	40.98	43.06	27.19	88.71	56.79
ENSMMUG00000023942	-0.167657	13.8925	0.51606	1	14358.4	16110.1	18224.6	15866.9	14959	19551.6	12827.7	10850	11636.5	20786.8	11529.4
ENSMMUG00000026541	-0.608208	7.07972	0.517839	1	53.37	80.54	0	101.06	102.81	25.33	0	129.17	27.19	118.27	85.19
ENSMMUG00000027793	-0.478424	7.10722	0.518359	1	52.85	80.54	49.26	101.06	102.81	50.65	0	0	135.94	118.27	28.4
ENSMMUG00000027705	0.616076	6.98897	0.518848	1	67.67	40.74	0	0	51.41	25.33	81.97	172.22	27.19	29.57	113.59
ENSMMUG00000032960	-0.365668	8.36778	0.519068	1	238.7	296.38	246.28	202.13	359.84	101.3	327.86	344.44	217.5	295.69	283.97
ENSMMUG00000027444	-0.897385	6.73993	0.519372	1	22.1	50.98	0	0	51.41	25.33	122.95	0	0	29.57	85.19
ENSMMUG00000028010	-1.16256	6.69045	0.521551	1	25.38	42.42	98.51	0	51.41	0	0	0	0	118.27	28.4
ENSMMUG00000027726	-0.632313	6.91123	0.522967	1	41.69	69.07	98.51	50.53	102.81	0	122.95	0	81.56	0	28.4
ENSMMUG00000024314	0.312582	8.63354	0.523602	1	348.58	271.94	98.51	202.13	102.81	455.87	368.85	516.67	217.5	413.96	454.36
ENSMMUG00000035907	-0.968921	6.90229	0.525839	1	42.36	59.84	98.51	50.53	0	0	40.98	86.11	27.19	147.84	0
ENSMMUG00000028390	-0.361932	9.18109	0.525915	1	464.36	584.59	788.09	859.04	359.84	202.61	409.83	344.44	163.13	709.65	823.53
ENSMMUG00000027721	0.596248	7.13243	0.526588	1	90.55	50.98	147.77	0	51.41	75.98	122.95	172.22	0	29.57	56.79
ENSMMUG00000024671	0.260275	10.1784	0.526799	1	1151.72	994.07	689.58	909.57	1439.35	1139.67	1065.56	904.17	1576.91	561.81	1448.27
ENSMMUG00000023907	0.254281	9.35535	0.528874	1	614.22	512.12	344.79	404.25	308.43	1013.04	655.73	602.78	570.95	680.08	539.55
ENSMMUG00000034706	-0.380311	9.30591	0.529043	1	512.83	657.99	837.35	1212.76	411.24	101.3	327.86	559.72	299.07	680.08	766.73
ENSMMUG00000025257	-0.300112	9.15844	0.530081	1	465.5	557.09	344.79	454.78	462.65	202.61	778.68	861.11	407.82	532.24	511.15
ENSMMUG00000027918	1.0487	6.50142	0.541277	1	25.66	7.39	49.26	0	0	50.65	0	0	0	29.57	28.4
ENSMMUG00000027853	1.0528	6.5145	0.54137	1	29.82	10.25	49.26	0	0	0	40.98	43.06	0	0	56.79
ENSMMUG00000035756	1.29204	6.55899	0.541443	1	26.69	12.63	0	50.53	0	50.65	0	0	54.38	0	28.4
ENSMMUG00000033798	-0.377603	8.36733	0.541574	1	244.29	298.77	295.53	252.66	359.84	50.65	286.88	430.56	217.5	295.69	227.18
ENSMMUG00000027435	1.06021	6.5182	0.54192	1	32.14	10.25	49.26	0	0	25.33	40.98	86.11	0	0	0
ENSMMUG00000035318	1.06819	6.51107	0.542073	1	30.82	7.39	98.51	0	0	0	0	0	27.19	29.57	28.4
ENSMMUG00000027891	1.05129	6.51303	0.542658	1	28.58	10.25	0	0	0	0	40.98	86.11	0	0	56.79
ENSMMUG00000025672	0.189949	10.5957	0.550188	1	1554.3	1348.11	1083.62	1061.16	719.68	1620.86	1926.2	1722.22	1413.78	1685.42	1931.03
ENSMMUG00000025353	-0.269059	9.52656	0.551798	1	624.29	741.64	541.81	505.32	822.49	303.91	1106.54	1076.39	489.39	532.24	709.94
ENSMMUG00000024923	0.184395	9.98633	0.557955	1	1014.29	862.95	1526.92	1010.63	411.24	911.73	1024.57	1076.39	761.27	1005.34	795.13
ENSMMUG00000023839	-0.296475	8.82725	0.559892	1	364.19	423.95	541.81	555.85	257.03	151.96	409.83	430.56	299.07	473.1	397.56
ENSMMUG00000025472	-0.502414	7.69911	0.569816	1	117.7	170.26	197.02	0	462.65	101.3	40.98	43.06	190.32	177.41	56.79
ENSMMUG00000026788	-0.0949182	13.3353	0.573152	1	9962.25	10646.3	9013.77	8792.49	12440.1	9674.51	10737.5	10850	11554.9	10615.2	8718.01
ENSMMUG00000025903	0.513639	6.80545	0.579933	1	52.11	33.09	49.26	0	102.81	25.33	0	129.17	0	29.57	56.79
ENSMMUG00000036516	-0.198696	9.36854	0.583595	1	560.11	635.66	492.56	505.32	719.68	607.82	696.71	818.06	598.14	620.94	283.97
ENSMMUG00000027976	-0.279627	8.12251	0.589206	1	185.42	225.2	98.51	151.59	102.81	278.59	409.83	215.28	135.94	236.55	198.78
ENSMMUG00000025554	0.145833	12.7841	0.590254	1	7270.68	6610.52	6403.23	7226.01	7299.57	9471.9	7008.09	5080.56	9434.27	4908.41	5963.46
ENSMMUG00000033085	0.406034	7.27671	0.591935	1	103.91	62.23	246.28	101.06	0	75.98	0	86.11	54.38	147.84	56.79
ENSMMUG00000032774	-0.103903	11.8182	0.592628	1	3409.64	3700.35	2906.08	3486.68	3906.81	4406.71	4303.21	3143.06	3099.44	3104.72	3492.89
ENSMMUG00000033050	-0.12786	16.1586	0.595482	1	70204.4	76697.3	80779.2	59223	89702.4	80080.6	72498.9	67468.1	80694.3	85364.9	41999.8
ENSMMUG00000034149	0.231609	7.97478	0.603785	1	202.96	158.72	394.04	202.13	102.81	101.3	122.95	129.17	163.13	206.98	227.18
ENSMMUG00000024975	-0.504241	7.49326	0.612142	1	98.38	128.94	147.77	151.59	0	50.65	245.9	129.17	135.94	118.27	28.4
ENSMMUG00000027408	1.95294	6.30026	0.622518	1	10.5	0	0	0	0	25.33	0	0	27.19	0	0
ENSMMUG00000036892	1.95294	6.30026	0.622518	1	10.5	0	0	0	0	25.33	0	0	27.19	0	0
ENSMMUG00000035843	1.95425	6.30093	0.622519	1	10.74	0	0	0	0	25.33	0	0	0	0	28.4
ENSMMUG00000027630	1.9565	6.30205	0.62252	1	11.12	0	0	0	0	0	0	0	27.19	0	28.4
ENSMMUG00000024050	1.96686	6.30759	0.622556	1	14.05	0	0	0	0	0	0	43.06	27.19	0	0
ENSMMUG00000027575	1.96819	6.30826	0.622556	1	14.29	0	0	0	0	0	0	43.06	0	0	28.4
ENSMMUG00000036206	1.96819	6.30826	0.622556	1	14.29	0	0	0	0	0	0	43.06	0	0	28.4
ENSMMUG00000036399	1.96819	6.30826	0.622556	1	14.29	0	0	0	0	0	0	43.06	0	0	28.4
ENSMMUG00000036376	1.96457	6.30647	0.622556	1	13.68	0	0	0	0	25.33	0	43.06	0	0	0
ENSMMUG00000023991	1.97083	6.30975	0.622579	1	15.53	0	49.26	0	0	0	0	0	0	0	28.4
ENSMMUG00000028428	1.97083	6.30975	0.622579	1	15.53	0	49.26	0	0	0	0	0	0	0	28.4
ENSMMUG00000034676	1.97083	6.30975	0.622579	1	15.53	0	49.26	0	0	0	0	0	0	0	28.4
ENSMMUG00000023904	1.96949	6.30909	0.622579	1	15.29	0	49.26	0	0	0	0	0	27.19	0	0
ENSMMUG00000032912	-0.152227	11.6502	0.632933	1	2994.04	3353.35	3201.61	3486.68	5243.35	4102.8	2377.01	2583.34	3208.2	2306.36	1874.23
ENSMMUG00000028439	-0.367551	7.42876	0.636293	1	88.34	127.4	49.26	101.06	308.43	0	40.98	86.11	135.94	59.14	170.38
ENSMMUG00000036785	0.284377	8.96078	0.642958	1	452.03	386.92	394.04	555.85	514.05	683.8	122.95	301.39	625.33	354.82	255.58
ENSMMUG00000034390	-0.366269	8.10772	0.643168	1	184.31	237.13	295.53	404.25	102.81	50.65	204.91	43.06	163.13	236.55	369.17
ENSMMUG00000026596	-0.111717	12.4073	0.648595	1	5182.65	5581.58	6255.46	4699.43	5500.38	6635.4	5532.7	4176.39	3507.26	6593.83	5338.72
ENSMMUG00000024320	0.32092	8.20072	0.649754	1	251.05	190.64	443.3	202.13	205.62	50.65	0	172.22	163.13	354.82	425.96
ENSMMUG00000033069	0.239131	9.61023	0.651289	1	737.24	639.84	443.3	859.04	359.84	1367.6	778.68	301.39	1005.96	561.81	567.95
ENSMMUG00000024747	0.214618	10.5978	0.653164	1	1547.38	1329.26	738.83	1414.88	616.86	2228.68	860.64	1119.45	1576.91	2424.64	2073.01
ENSMMUG00000027463	-0.336432	8.14379	0.65539	1	199.5	229.27	295.53	202.13	102.81	151.96	286.88	215.28	135.94	325.26	198.78
ENSMMUG00000025918	0.518776	6.93184	0.660078	1	63.61	29.57	98.51	0	0	50.65	0	86.11	54.38	118.27	28.4
ENSMMUG00000032811	-0.167399	8.96611	0.661687	1	412.73	463.18	344.79	555.85	514.05	227.93	368.85	602.78	462.2	413.96	425.96
ENSMMUG00000024083	0.922847	6.92752	0.662463	1	57.05	35.73	0	50.53	51.41	50.65	40.98	43.06	163.13	0	28.4
ENSMMUG00000033035	0.107928	10.8449	0.664766	1	1828.8	1688.1	2117.99	2021.26	1130.92	2026.08	1885.22	1550	1604.1	1714.99	1845.83
ENSMMUG00000028083	0.566725	6.63122	0.667112	1	34.89	20.03	49.26	50.53	0	25.33	0	43.06	0	29.57	56.79
ENSMMUG00000024301	0.764412	6.67252	0.668731	1	32.36	20.49	0	0	0	50.65	81.97	0	54.38	0	56.79
ENSMMUG00000035758	0.405555	7.40355	0.671954	1	108.65	80.32	49.26	151.59	51.41	126.63	0	172.22	81.56	118.27	113.59
ENSMMUG00000026792	-0.090349	10.8791	0.680379	1	1751.95	1881.4	1625.43	1920.2	1850.59	2254.01	1803.25	1550	1740.04	1951.54	1590.26
ENSMMUG00000026229	0.146363	14.364	0.691901	1	21941.5	19826	18618.6	17534.5	21179	33227.6	13032.6	17652.8	29417.5	27558	10791
ENSMMUG00000028261	-0.309243	7.98549	0.693071	1	174.95	204.44	295.53	252.66	205.62	126.63	122.95	172.22	81.56	236.55	198.78
ENSMMUG00000032915	-0.614883	6.97923	0.698284	1	42.22	67.69	49.26	101.06	51.41	50.65	0	0	54.38	118.27	56.79
ENSMMUG00000024009	-0.433999	6.93467	0.698392	1	39.75	63.37	0	50.53	102.81	101.3	40.98	43.06	54.38	59.14	0
ENSMMUG00000033223	0.2777	8.41569	0.700981	1	280.84	242.97	49.26	202.13	462.65	455.87	40.98	344.44	299.07	266.12	255.58
ENSMMUG00000025132	-0.101192	10.8558	0.715156	1	1716.9	1849.24	1625.43	1667.54	1902	2329.99	1639.32	1248.61	1250.65	2188.09	2129.81
ENSMMUG00000026768	-0.257867	8.92205	0.718289	1	401.49	454.67	640.32	404.25	308.43	50.65	573.76	645.83	244.69	532.24	425.96
ENSMMUG00000035915	-0.204197	8.45307	0.723474	1	267.56	309.22	246.28	303.19	462.65	303.91	204.91	430.56	271.88	266.12	85.19
ENSMMUG00000027955	0.479772	6.95499	0.727395	1	67.78	43.34	147.77	0	102.81	50.65	40.98	86.11	54.38	29.57	0
ENSMMUG00000024688	0.304861	8.066	0.733258	1	204.23	169.65	49.26	101.06	154.22	227.93	245.9	215.28	244.69	177.41	283.97
ENSMMUG00000025750	0.133485	9.87122	0.733901	1	900.35	801.02	886.6	808.5	514.05	1013.04	491.8	947.22	462.2	1389.73	1192.69
ENSMMUG00000027697	-0.584817	6.69694	0.740492	1	28.34	43.12	0	50.53	51.41	0	40.98	86.11	27.19	29.57	28.4
ENSMMUG00000028206	-0.838514	6.74985	0.741228	1	32.51	45.27	49.26	0	51.41	0	40.98	86.11	27.19	88.71	0
ENSMMUG00000025250	-0.570653	6.77596	0.744439	1	27.91	39.81	0	0	0	0	40.98	0	54.38	118.27	85.19
ENSMMUG00000036607	-0.395638	7.38971	0.754621	1	88.18	111.74	147.77	50.53	102.81	25.33	204.91	43.06	54.38	88.71	170.38
ENSMMUG00000035506	0.494792	6.78985	0.760423	1	44.52	30.27	0	50.53	0	25.33	40.98	86.11	54.38	29.57	56.79
ENSMMUG00000034195	0.323395	6.75525	0.761019	1	48.04	30.27	98.51	50.53	0	0	40.98	86.11	27.19	29.57	28.4
ENSMMUG00000026293	0.49724	6.78063	0.761171	1	41.59	27.42	0	50.53	0	25.33	0	43.06	54.38	59.14	85.19
ENSMMUG00000028350	0.494058	6.78945	0.761341	1	44.39	30.27	0	50.53	0	50.65	40.98	86.11	0	29.57	85.19
ENSMMUG00000034426	-0.179349	9.70963	0.761486	1	741.76	813.6	1231.39	808.5	514.05	177.28	778.68	818.06	516.57	1153.18	965.51
ENSMMUG00000035659	-0.0846559	9.70809	0.761889	1	740.18	793.81	689.58	505.32	976.7	962.39	983.59	688.89	706.89	709.65	653.14
ENSMMUG00000024353	0.127529	9.22884	0.764389	1	539.47	502.22	492.56	303.19	565.46	658.47	696.71	387.5	761.27	443.53	397.56
ENSMMUG00000035865	0.502724	6.79895	0.765868	1	50.19	32.66	147.77	101.06	0	75.98	0	0	27.19	29.57	0
ENSMMUG00000032750	-0.130715	9.91979	0.766485	1	851.42	925.7	837.35	1010.63	359.84	1164.99	942.61	473.61	815.64	1389.73	965.51
ENSMMUG00000024168	-0.577094	6.68507	0.766505	1	25.41	37.66	0	50.53	0	0	40.98	43.06	27.19	59.14	56.79
ENSMMUG00000023878	-0.921903	6.63019	0.766744	1	19.49	37.66	0	50.53	0	0	40.98	43.06	54.38	59.14	0
ENSMMUG00000034409	-0.893016	6.64519	0.767143	1	28.31	37.88	98.51	0	51.41	0	40.98	43.06	0	59.14	0
ENSMMUG00000025577	0.170014	8.59404	0.768187	1	334.46	279.03	541.81	0	308.43	455.87	245.9	258.33	217.5	561.81	198.78
ENSMMUG00000033155	-0.12102	11.0641	0.769314	1	2004.16	2139.96	2216.5	1566.48	1079.51	1316.95	2336.03	2669.45	1631.29	3577.82	2186.6
ENSMMUG00000025096	0.0613277	13.0425	0.770315	1	8508.29	8188.08	8028.66	8489.3	9510	11320.7	7213.01	7965.29	7531.1	7540.02	7695.71
ENSMMUG00000026121	-0.195146	7.73796	0.770607	1	130.41	156.57	98.51	252.66	102.81	177.28	122.95	129.17	190.32	147.84	56.79
ENSMMUG00000025698	-1.01541	6.5151	0.797347	1	14.92	30.27	49.26	50.53	0	25.33	40.98	0	0	29.57	0
ENSMMUG00000027657	-0.573167	6.56789	0.797401	1	16.55	30.49	0	0	51.41	0	40.98	0	54.38	29.57	28.4
ENSMMUG00000027510	-0.536419	6.45493	0.797532	1	14.05	25.48	0	50.53	51.41	0	0	43.06	27.19	0	0
ENSMMUG00000034447	-0.532561	6.45707	0.797549	1	15.53	25.48	49.26	50.53	51.41	0	0	0	0	0	28.4
ENSMMUG00000024990	-1.00606	6.50955	0.797561	1	13.68	27.64	0	0	51.41	25.33	0	43.06	0	59.14	0
ENSMMUG00000027323	-1.03349	6.51195	0.797805	1	11.12	33.09	0	0	102.81	0	0	0	27.19	29.57	28.4
ENSMMUG00000025303	-0.524732	6.46107	0.797999	1	17.22	25.48	0	50.53	51.41	0	0	86.11	0	0	0
ENSMMUG00000036398	-0.557337	6.56478	0.798264	1	17.04	27.42	0	50.53	0	0	0	0	0	59.14	85.19
ENSMMUG00000024463	0.718024	6.44677	0.805765	1	23.53	7.39	49.26	0	0	25.33	0	43.06	0	29.57	0
ENSMMUG00000027840	0.697744	6.4467	0.805792	1	20.97	10.25	49.26	0	0	0	40.98	0	27.19	0	28.4
ENSMMUG00000025555	0.694308	6.44496	0.805801	1	20.35	10.25	49.26	0	0	25.33	40.98	0	27.19	0	0
ENSMMUG00000026269	0.688913	6.44754	0.805812	1	19.73	12.63	0	50.53	0	0	0	43.06	27.19	0	28.4
ENSMMUG00000027580	0.685459	6.4458	0.80582	1	19.11	12.63	0	50.53	0	25.33	0	43.06	27.19	0	0
ENSMMUG00000035353	1.03856	6.49565	0.805822	1	21.86	7.39	0	0	0	25.33	0	0	27.19	29.57	56.79
ENSMMUG00000034941	-0.159363	9.40486	0.805967	1	602.88	658.42	1477.67	1111.69	514.05	278.59	327.86	387.5	217.5	680.08	653.14
ENSMMUG00000023834	0.709726	6.44158	0.806054	1	19.97	7.39	0	0	0	0	0	43.06	0	29.57	56.79
ENSMMUG00000024276	0.712424	6.44306	0.806076	1	21.21	7.39	49.26	0	0	0	0	0	0	29.57	56.79
ENSMMUG00000034229	0.712424	6.44306	0.806076	1	21.21	7.39	49.26	0	0	0	0	0	0	29.57	56.79
ENSMMUG00000026223	1.04071	6.49672	0.806101	1	22.23	7.39	0	0	0	0	0	0	54.38	29.57	56.79
ENSMMUG00000024539	0.684869	6.44636	0.806128	1	19.98	12.85	49.26	0	51.41	50.65	0	0	0	0	0
ENSMMUG00000034845	0.692604	6.44967	0.806168	1	21.21	12.63	49.26	50.53	0	0	0	0	0	0	56.79
ENSMMUG00000027317	1.01798	6.50261	0.806567	1	21.99	12.63	0	50.53	0	0	0	0	81.56	0	28.4
ENSMMUG00000026493	-0.0706258	10.492	0.808251	1	1338.74	1399.36	985.11	1061.16	1336.54	1570.21	1721.29	1722.22	1223.46	1478.44	1192.69
ENSMMUG00000026456	0.0758641	13.1207	0.810129	1	9026.44	8584.84	8866.01	9803.12	8173.46	8788.1	8852.33	5338.9	14926.3	7510.46	7212.95
ENSMMUG00000033713	-0.209932	7.63762	0.810393	1	115.03	130.85	98.51	101.06	51.41	101.3	163.93	43.06	190.32	206.98	141.99
ENSMMUG00000028399	-0.19637	7.96557	0.817514	1	178.69	206.47	147.77	151.59	462.65	50.65	122.95	387.5	108.75	88.71	198.78
ENSMMUG00000035975	0.494346	6.80584	0.835033	1	50.55	35.51	98.51	101.06	0	0	40.98	43.06	54.38	0	56.79
ENSMMUG00000034105	0.171037	6.84127	0.835411	1	49.55	32.42	49.26	0	0	0	40.98	86.11	27.19	88.71	85.19
ENSMMUG00000036882	0.155446	6.85899	0.835573	1	54.72	40.52	147.77	50.53	0	0	81.97	43.06	54.38	29.57	28.4
ENSMMUG00000025136	-1.18966	6.3756	0.835725	1	5.44	17.64	0	0	0	0	40.98	0	27.19	29.57	0
ENSMMUG00000034975	-1.19636	6.37811	0.835738	1	5.44	20.24	0	0	51.41	0	0	0	27.19	29.57	0
ENSMMUG00000032794	-1.18442	6.38428	0.835755	1	8.61	20.24	0	0	51.41	0	0	43.06	0	29.57	0
ENSMMUG00000035981	-1.19702	6.38862	0.835757	1	8.61	23.1	0	0	51.41	0	40.98	43.06	0	0	0
ENSMMUG00000024750	-1.18126	6.38559	0.835762	1	9.85	20.03	49.26	50.53	0	0	0	0	0	29.57	0
ENSMMUG00000027483	-0.512058	6.43435	0.835795	1	10.5	14.78	0	0	0	25.33	0	0	27.19	59.14	0
ENSMMUG00000027370	-1.17493	6.37194	0.835833	1	5.68	14.78	0	0	0	0	0	0	0	59.14	28.4
ENSMMUG00000028450	-1.17493	6.37194	0.835833	1	5.68	14.78	0	0	0	0	0	0	0	59.14	28.4
ENSMMUG00000024138	-1.20122	6.38059	0.835908	1	5.68	20.49	0	0	0	0	81.97	0	0	0	28.4
ENSMMUG00000027465	-1.20122	6.38059	0.835908	1	5.68	20.49	0	0	0	0	81.97	0	0	0	28.4
ENSMMUG00000037428	-1.20397	6.39079	0.836003	1	8.61	25.27	0	101.06	0	0	0	43.06	0	0	0
ENSMMUG00000026656	-1.20098	6.39228	0.836014	1	9.85	25.27	49.26	101.06	0	0	0	0	0	0	0
ENSMMUG00000024552	0.0575967	8.00106	0.842318	1	207.9	176.57	492.56	151.59	154.22	25.33	163.93	215.28	135.94	236.55	170.38
ENSMMUG00000034071	-0.224523	7.58034	0.843733	1	116.63	126.77	98.51	50.53	51.41	50.65	286.88	215.28	190.32	118.27	28.4
ENSMMUG00000024847	-0.170237	8.5273	0.843942	1	297.54	304.78	344.79	202.13	257.03	151.96	286.88	516.67	190.32	473.1	283.97
ENSMMUG00000023922	0.0703604	10.7488	0.844333	1	1682.7	1613.8	1576.18	1414.88	2261.84	1823.47	1270.47	1894.45	2011.92	1508	1107.5
ENSMMUG00000024709	-0.047009	13.8986	0.844518	1	14961.5	15489.7	11772.1	14755.2	15832.9	16791.1	18360.4	10850	13159	13010.2	22235.2
ENSMMUG00000024499	0.0455351	12.7821	0.847533	1	7051.63	6872.17	5319.6	7630.26	6888.32	6331.49	7499.89	7448.62	8292.37	5470.21	7866.09
ENSMMUG00000033248	0.200561	8.26261	0.852834	1	244.28	220.83	197.02	151.59	308.43	253.26	245.9	215.28	271.88	177.41	283.97
ENSMMUG00000024346	-0.199832	7.84112	0.853863	1	151.07	163.72	147.77	151.59	102.81	126.63	163.93	172.22	81.56	236.55	227.18
ENSMMUG00000026102	-0.221006	7.51573	0.854969	1	107.51	118.89	49.26	50.53	154.22	50.65	122.95	215.28	108.75	147.84	113.59
ENSMMUG00000037064	-0.235499	7.47273	0.857948	1	103.56	125.29	147.77	101.06	154.22	101.3	245.9	129.17	54.38	0	85.19
ENSMMUG00000025523	-0.0750047	12.6911	0.861163	1	6395.18	6733.3	6501.74	2981.36	7196.75	3039.11	12172	6458.34	5356.06	4583.15	10620.6
ENSMMUG00000026039	-0.0538325	10.2141	0.862268	1	1091.15	1139.79	935.86	757.97	1336.54	1342.28	1311.46	1033.33	951.58	1153.18	1192.69
ENSMMUG00000026409	0.106089	8.78211	0.864986	1	394.48	357.22	492.56	505.32	154.22	101.3	532.78	602.78	435.01	236.55	340.77
ENSMMUG00000024764	-0.0332647	9.80244	0.872805	1	808.96	846.77	541.81	1061.16	873.89	835.76	860.64	1076.39	625.33	591.37	965.51
ENSMMUG00000028064	0.0888313	9.38688	0.873072	1	622.28	585.56	788.09	555.85	873.89	557.17	409.83	688.89	679.7	502.67	397.56
ENSMMUG00000026686	-0.0888954	9.5358	0.87391	1	660.12	685.57	689.58	555.85	411.24	379.89	1065.56	775	462.2	709.65	993.91
ENSMMUG00000024942	-0.236699	6.99552	0.880197	1	54.13	63.83	49.26	0	102.81	25.33	122.95	86.11	81.56	29.57	28.4
ENSMMUG00000033530	-0.200019	7.403	0.880354	1	94.7	117.19	98.51	151.59	205.62	50.65	81.97	129.17	81.56	29.57	113.59
ENSMMUG00000033837	0.0400908	13.9247	0.880489	1	15658.2	15249.9	15811	15412.1	15061.8	23705.1	17130.9	11452.8	12044.3	13394.6	15277.8
ENSMMUG00000026405	0.0488441	11.6805	0.882912	1	3251.13	3165.1	2364.27	2627.64	4318.05	3925.52	3319.62	4047.23	3561.64	2395.07	2356.99
ENSMMUG00000032814	0.0640041	10.8667	0.886473	1	1819.07	1754.29	1970.22	2476.05	1542.16	2254.01	1106.54	861.11	2419.74	1892.4	1590.26
ENSMMUG00000027366	0.23008	7.7747	0.891972	1	148.7	136.54	49.26	202.13	102.81	227.93	122.95	129.17	81.56	118.27	255.58
ENSMMUG00000027320	-0.0802782	9.58083	0.892496	1	688.78	704.4	1034.37	555.85	514.05	329.24	860.64	516.67	598.14	887.06	965.51
ENSMMUG00000025425	0.174166	6.98128	0.894722	1	57.49	48.13	49.26	0	51.41	0	81.97	43.06	81.56	59.14	113.59
ENSMMUG00000035513	0.456419	6.95207	0.894878	1	62.85	45.98	49.26	50.53	51.41	50.65	81.97	129.17	0	0	85.19
ENSMMUG00000034936	-0.166781	8.24228	0.89497	1	228.33	238.55	246.28	252.66	205.62	50.65	81.97	344.44	244.69	413.96	255.58
ENSMMUG00000028099	0.320086	6.90626	0.895775	1	58.4	43.12	49.26	50.53	51.41	0	40.98	129.17	0	29.57	113.59
ENSMMUG00000025943	0.20704	6.97549	0.897092	1	58.57	42.42	0	0	51.41	25.33	0	129.17	81.56	118.27	56.79
ENSMMUG00000024450	-0.082297	9.06225	0.907709	1	455.5	472.98	541.81	404.25	411.24	582.5	573.76	430.56	353.45	502.67	369.17
ENSMMUG00000026047	0.547422	6.6146	0.910032	1	26.93	17.64	0	0	0	50.65	40.98	0	27.19	29.57	56.79
ENSMMUG00000028503	0.543541	6.62922	0.910044	1	30.85	23.1	0	0	51.41	0	40.98	43.06	54.38	0	56.79
ENSMMUG00000024466	0.304141	6.58193	0.910225	1	32.75	20.24	49.26	0	51.41	0	0	86.11	0	29.57	28.4
ENSMMUG00000024976	-0.146267	7.97977	0.910813	1	173.21	187.26	197.02	50.53	257.03	151.96	204.91	129.17	217.5	236.55	170.38
ENSMMUG00000024896	-0.408406	6.92808	0.917793	1	40.49	55.52	0	0	51.41	50.65	81.97	43.06	108.75	88.71	0
ENSMMUG00000026641	0.213303	7.83865	0.922687	1	155.18	146.76	98.51	151.59	205.62	329.24	81.97	43.06	163.13	147.84	141.99
ENSMMUG00000026454	-0.137839	7.91659	0.934189	1	155.37	173.97	49.26	151.59	102.81	177.28	204.91	129.17	108.75	236.55	312.37
ENSMMUG00000035242	-0.13495	7.31584	0.938267	1	86.47	96.24	147.77	101.06	154.22	75.98	40.98	43.06	108.75	88.71	56.79
ENSMMUG00000032884	-0.130929	8.11359	0.939055	1	206.25	215.16	246.28	202.13	205.62	177.28	245.9	301.39	135.94	206.98	170.38
ENSMMUG00000037212	0.0294668	14.0066	0.942318	1	16527.2	16193.5	14628.9	14047.8	18711.6	22869.3	9631	14854.2	22076.7	22383.5	8206.86
ENSMMUG00000036757	0.0509881	9.24717	0.943279	1	557.25	530.64	591.07	606.38	359.84	303.91	860.64	861.11	462.2	295.69	567.95
ENSMMUG00000033673	0.0951541	8.55641	0.944479	1	312.07	287.63	246.28	303.19	205.62	354.56	286.88	344.44	217.5	354.82	397.56
ENSMMUG00000026512	0.185	6.99722	0.94577	1	64.84	50.98	98.51	0	51.41	0	122.95	86.11	54.38	29.57	85.19
ENSMMUG00000025057	0.191845	7.00031	0.946173	1	67.02	50.98	98.51	0	51.41	50.65	122.95	129.17	0	29.57	56.79
ENSMMUG00000028067	-0.0899202	9.07513	0.959746	1	471.06	476.7	886.6	656.91	205.62	227.93	245.9	430.56	299.07	798.36	511.15
ENSMMUG00000035737	0.156781	7.4717	0.960946	1	99.89	92.72	0	101.06	51.41	177.28	40.98	43.06	108.75	177.41	170.38
ENSMMUG00000027715	-0.106154	6.80625	0.962235	1	39.08	50.97	0	101.06	102.81	25.33	0	86.11	27.19	0	56.79
ENSMMUG00000033778	-0.306501	6.75025	0.962251	1	35.88	43.12	98.51	50.53	51.41	25.33	40.98	0	27.19	29.57	28.4
ENSMMUG00000025533	-0.0644455	8.56506	0.968944	1	300.97	312.89	295.53	404.25	205.62	405.22	286.88	301.39	190.32	354.82	312.37
ENSMMUG00000025475	-0.199019	7.19858	0.972598	1	71.55	83.39	98.51	101.06	102.81	50.65	40.98	43.06	108.75	88.71	56.79
ENSMMUG00000025749	-0.0283117	9.13476	0.976347	1	494.35	497.99	541.81	606.38	514.05	430.54	368.85	602.78	271.88	502.67	624.74
ENSMMUG00000032883	-0.0100575	8.00292	0.982307	1	178.42	192.51	147.77	252.66	205.62	253.26	163.93	129.17	163.13	147.84	198.78
ENSMMUG00000035863	-0.0857747	8.36752	0.984045	1	266.6	269.68	394.04	101.06	308.43	75.98	491.8	387.5	163.13	177.41	312.37
ENSMMUG00000033610	-0.00223209	15.3743	0.987727	1	42381.4	42435.4	46398.8	42901.3	38965.3	51310.4	41392.8	35951.4	38688.7	46482	39557.6
ENSMMUG00000028483	0.688122	6.43094	1	1	15.2	7.39	0	0	0	75.98	0	0	0	29.57	0
ENSMMUG00000036278	0.681944	6.43804	1	1	16.18	10.25	0	0	0	25.33	40.98	0	27.19	0	28.4
ENSMMUG00000027638	0.677573	6.44226	1	1	16.8	12.85	0	0	51.41	0	0	0	27.19	0	56.79
ENSMMUG00000034405	-0.559181	6.69386	1	1	31.06	37.66	98.51	50.53	0	0	40.98	0	0	59.14	56.79
ENSMMUG00000027459	-0.552837	6.57288	1	1	20.97	27.88	49.26	0	0	0	81.97	0	27.19	29.57	28.4
ENSMMUG00000033201	-0.541956	6.44631	1	1	10.88	22.88	0	50.53	0	0	40.98	0	54.38	0	0
ENSMMUG00000035786	-0.541956	6.44631	1	1	10.88	22.88	0	50.53	0	0	40.98	0	54.38	0	0
ENSMMUG00000028316	-0.534072	6.44002	1	1	10.13	20.24	0	0	51.41	50.65	0	0	0	29.57	0
ENSMMUG00000027498	-0.531002	6.56194	1	1	19.36	22.18	0	0	0	25.33	0	43.06	0	88.71	28.4
ENSMMUG00000033277	-0.5279	6.44285	1	1	11.12	20.24	0	0	51.41	0	0	0	27.19	29.57	28.4
ENSMMUG00000025278	-0.521772	6.45075	1	1	14.29	20.49	0	0	0	0	81.97	43.06	0	0	28.4
ENSMMUG00000026787	-0.521309	6.44036	1	1	11.12	17.64	0	0	0	0	40.98	0	27.19	29.57	28.4
ENSMMUG00000028034	-0.520375	6.45158	1	1	15.29	20.49	49.26	0	0	0	81.97	0	27.19	0	0
ENSMMUG00000037221	-0.51728	6.44813	1	1	14.05	20.03	0	50.53	0	0	0	43.06	27.19	29.57	0
ENSMMUG00000027817	-0.516936	6.44852	1	1	14.92	20.03	49.26	50.53	0	25.33	0	0	0	29.57	0
ENSMMUG00000036119	-0.515973	6.44878	1	1	14.29	20.03	0	50.53	0	0	0	43.06	0	29.57	28.4
ENSMMUG00000034673	-0.51514	6.44978	1	1	15.29	20.24	49.26	0	51.41	0	0	0	27.19	29.57	0
ENSMMUG00000025477	-0.513826	6.45043	1	1	15.53	20.24	49.26	0	51.41	0	0	0	0	29.57	28.4
ENSMMUG00000025031	-0.507267	6.44794	1	1	15.53	17.64	49.26	0	0	0	40.98	0	0	29.57	28.4
ENSMMUG00000036079	0.450476	6.78556	1	1	38.42	35.95	0	0	102.81	25.33	40.98	0	81.56	0	85.19
ENSMMUG00000024139	-0.4469	6.30841	1	1	5.07	12.85	0	0	51.41	25.33	0	0	0	0	0
ENSMMUG00000024922	-0.4469	6.30841	1	1	5.07	12.85	0	0	51.41	25.33	0	0	0	0	0
ENSMMUG00000036041	-0.4469	6.30841	1	1	5.07	12.85	0	0	51.41	25.33	0	0	0	0	0
ENSMMUG00000024468	-0.446404	6.30823	1	1	5.07	12.63	0	50.53	0	25.33	0	0	0	0	0
ENSMMUG00000032978	-0.446404	6.30823	1	1	5.07	12.63	0	50.53	0	25.33	0	0	0	0	0
ENSMMUG00000027585	-0.444535	6.30953	1	1	5.44	12.85	0	0	51.41	0	0	0	27.19	0	0
ENSMMUG00000036772	-0.444535	6.30953	1	1	5.44	12.85	0	0	51.41	0	0	0	27.19	0	0
ENSMMUG00000027372	-0.44404	6.30935	1	1	5.44	12.63	0	50.53	0	0	0	0	27.19	0	0
ENSMMUG00000028137	-0.44404	6.30935	1	1	5.44	12.63	0	50.53	0	0	0	0	27.19	0	0
ENSMMUG00000035434	-0.443157	6.3102	1	1	5.68	12.85	0	0	51.41	0	0	0	0	0	28.4
ENSMMUG00000024402	-0.442662	6.31002	1	1	5.68	12.63	0	50.53	0	0	0	0	0	0	28.4
ENSMMUG00000025515	-0.442662	6.31002	1	1	5.68	12.63	0	50.53	0	0	0	0	0	0	28.4
ENSMMUG00000028489	-0.442662	6.31002	1	1	5.68	12.63	0	50.53	0	0	0	0	0	0	28.4
ENSMMUG00000035858	-0.442662	6.31002	1	1	5.68	12.63	0	50.53	0	0	0	0	0	0	28.4
ENSMMUG00000026693	-0.439741	6.30589	1	1	5.07	10.25	0	0	0	25.33	40.98	0	0	0	0
ENSMMUG00000027812	-0.439741	6.30589	1	1	5.07	10.25	0	0	0	25.33	40.98	0	0	0	0
ENSMMUG00000026577	-0.437388	6.30701	1	1	5.44	10.25	0	0	0	0	40.98	0	27.19	0	0
ENSMMUG00000026726	-0.436017	6.30768	1	1	5.68	10.25	0	0	0	0	40.98	0	0	0	28.4
ENSMMUG00000027588	-0.436017	6.30768	1	1	5.68	10.25	0	0	0	0	40.98	0	0	0	28.4
ENSMMUG00000033131	-0.436017	6.30768	1	1	5.68	10.25	0	0	0	0	40.98	0	0	0	28.4
ENSMMUG00000035423	-0.436017	6.30768	1	1	5.68	10.25	0	0	0	0	40.98	0	0	0	28.4
ENSMMUG00000037053	-0.436017	6.30768	1	1	5.68	10.25	0	0	0	0	40.98	0	0	0	28.4
ENSMMUG00000035295	-0.432354	6.31577	1	1	8.61	12.85	0	0	51.41	0	0	43.06	0	0	0
ENSMMUG00000025635	-0.429626	6.31727	1	1	9.85	12.85	49.26	0	51.41	0	0	0	0	0	0
ENSMMUG00000024391	-0.426731	6.30153	1	1	5.07	7.39	0	0	0	25.33	0	0	0	29.57	0
ENSMMUG00000036269	-0.426731	6.30153	1	1	5.07	7.39	0	0	0	25.33	0	0	0	29.57	0
ENSMMUG00000036678	-0.426731	6.30153	1	1	5.07	7.39	0	0	0	25.33	0	0	0	29.57	0
ENSMMUG00000025415	-0.425236	6.31324	1	1	8.61	10.25	0	0	0	0	40.98	43.06	0	0	0
ENSMMUG00000034131	-0.425236	6.31324	1	1	8.61	10.25	0	0	0	0	40.98	43.06	0	0	0
ENSMMUG00000035555	-0.425236	6.31324	1	1	8.61	10.25	0	0	0	0	40.98	43.06	0	0	0
ENSMMUG00000027426	-0.424384	6.30265	1	1	5.44	7.39	0	0	0	0	0	0	27.19	29.57	0
ENSMMUG00000037280	-0.424384	6.30265	1	1	5.44	7.39	0	0	0	0	0	0	27.19	29.57	0
ENSMMUG00000028323	-0.423015	6.30331	1	1	5.68	7.39	0	0	0	0	0	0	0	29.57	28.4
ENSMMUG00000034125	-0.423015	6.30331	1	1	5.68	7.39	0	0	0	0	0	0	0	29.57	28.4
ENSMMUG00000025212	-0.422497	6.31474	1	1	9.85	10.25	49.26	0	0	0	40.98	0	0	0	0
ENSMMUG00000028327	-0.422497	6.31474	1	1	9.85	10.25	49.26	0	0	0	40.98	0	0	0	0
ENSMMUG00000037359	-0.422497	6.31474	1	1	9.85	10.25	49.26	0	0	0	40.98	0	0	0	0
ENSMMUG00000026703	-0.412193	6.30886	1	1	8.61	7.39	0	0	0	0	0	43.06	0	29.57	0
ENSMMUG00000033195	-0.412193	6.30886	1	1	8.61	7.39	0	0	0	0	0	43.06	0	29.57	0
ENSMMUG00000034355	-0.412193	6.30886	1	1	8.61	7.39	0	0	0	0	0	43.06	0	29.57	0
ENSMMUG00000035870	-0.412193	6.30886	1	1	8.61	7.39	0	0	0	0	0	43.06	0	29.57	0
ENSMMUG00000028188	-0.409416	6.31036	1	1	9.85	7.39	49.26	0	0	0	0	0	0	29.57	0
ENSMMUG00000033740	-0.409416	6.31036	1	1	9.85	7.39	49.26	0	0	0	0	0	0	29.57	0
ENSMMUG00000023939	-0.351773	6.99891	1	1	61.69	57.2	197.02	0	51.41	25.33	0	86.11	0	177.41	0
ENSMMUG00000027794	0.269714	6.56891	1	1	25.42	20.49	49.26	0	0	50.65	81.97	0	27.19	0	0
ENSMMUG00000028035	0.269125	6.56294	1	1	22.23	20.03	0	50.53	0	0	0	0	54.38	29.57	56.79
ENSMMUG00000037087	0.268824	6.38384	1	1	18.46	7.39	49.26	0	0	0	0	43.06	0	29.57	0
ENSMMUG00000034526	0.267798	6.5729	1	1	26.03	22.88	49.26	50.53	0	25.33	40.98	0	27.19	0	28.4
ENSMMUG00000034389	0.261407	6.38967	1	1	19.7	10.25	98.51	0	0	0	40.98	0	0	0	0
ENSMMUG00000026681	0.258238	6.37832	1	1	15.53	7.39	49.26	0	0	0	0	0	0	29.57	28.4
ENSMMUG00000028485	0.258238	6.37832	1	1	15.53	7.39	49.26	0	0	0	0	0	0	29.57	28.4
ENSMMUG00000036513	0.254146	6.39202	1	1	19.7	12.63	98.51	50.53	0	0	0	0	0	0	0
ENSMMUG00000025417	0.246174	6.88863	1	1	45.43	48.8	0	0	154.22	101.3	40.98	43.06	54.38	0	28.4
ENSMMUG00000024995	0.245648	6.37135	1	1	11.36	7.39	0	0	0	0	0	0	0	29.57	56.79
ENSMMUG00000027826	0.242303	6.56901	1	1	22.1	25.27	0	101.06	0	25.33	0	0	0	0	85.19
ENSMMUG00000032797	0.241788	6.38089	1	1	14.92	10.25	49.26	0	0	25.33	40.98	0	0	0	0
ENSMMUG00000026211	0.240346	6.36893	1	1	10.5	7.39	0	0	0	25.33	0	0	27.19	29.57	0
ENSMMUG00000035191	0.238921	6.38499	1	1	15.53	12.63	49.26	50.53	0	0	0	0	0	0	28.4
ENSMMUG00000027418	0.238438	6.38517	1	1	15.53	12.85	49.26	0	51.41	0	0	0	0	0	28.4
ENSMMUG00000033717	0.238438	6.38517	1	1	15.53	12.85	49.26	0	51.41	0	0	0	0	0	28.4
ENSMMUG00000035418	0.238438	6.38517	1	1	15.53	12.85	49.26	0	51.41	0	0	0	0	0	28.4
ENSMMUG00000023843	0.23757	6.38433	1	1	15.29	12.63	49.26	50.53	0	0	0	0	27.19	0	0
ENSMMUG00000025959	0.232038	6.37567	1	1	11.36	10.25	0	0	0	0	40.98	0	0	0	56.79
ENSMMUG00000033121	0.225054	6.37799	1	1	11.36	12.63	0	50.53	0	0	0	0	0	0	56.79
ENSMMUG00000036136	0.224582	6.37215	1	1	10.13	10.25	0	0	0	50.65	40.98	0	0	0	0
ENSMMUG00000032860	0.224573	6.37734	1	1	11.12	12.63	0	50.53	0	0	0	0	27.19	0	28.4
ENSMMUG00000028491	0.224533	6.37817	1	1	11.36	12.85	0	0	51.41	0	0	0	0	0	56.79
ENSMMUG00000027935	-0.224397	6.63214	1	1	25.41	30.74	0	0	0	0	122.95	43.06	27.19	0	56.79
ENSMMUG00000034385	0.222304	6.37623	1	1	10.74	12.63	0	50.53	0	25.33	0	0	0	0	28.4
ENSMMUG00000027519	0.221816	6.37641	1	1	10.74	12.85	0	0	51.41	25.33	0	0	0	0	28.4
ENSMMUG00000027836	0.217613	6.37447	1	1	10.13	12.63	0	50.53	0	50.65	0	0	0	0	0
ENSMMUG00000027929	-0.210673	6.97484	1	1	48.13	55.05	0	50.53	51.41	0	0	43.06	27.19	118.27	170.38
ENSMMUG00000028512	-0.208997	6.63615	1	1	29.21	30.49	49.26	0	51.41	25.33	40.98	43.06	0	29.57	28.4
ENSMMUG00000024178	-0.182078	7.45803	1	1	103.17	111.27	49.26	101.06	102.81	25.33	122.95	215.28	27.19	118.27	198.78
ENSMMUG00000034414	0.18188	7.11042	1	1	67.87	63.15	49.26	101.06	51.41	50.65	40.98	43.06	54.38	59.14	141.99
ENSMMUG00000028097	-0.17545	6.62533	1	1	29.21	22.18	49.26	0	0	25.33	0	43.06	0	88.71	28.4
ENSMMUG00000034369	0.173459	6.86387	1	1	56.44	42.9	197.02	101.06	0	0	40.98	0	0	29.57	85.19
ENSMMUG00000023961	-0.164626	7.45707	1	1	107.73	108.17	197.02	101.06	154.22	101.3	0	129.17	54.38	177.41	56.79
ENSMMUG00000024438	-0.160648	6.84122	1	1	46.59	36.96	147.77	0	0	0	0	0	0	147.84	85.19
ENSMMUG00000027698	0.153664	6.98618	1	1	56.25	53.59	0	0	102.81	0	81.97	86.11	81.56	29.57	113.59
ENSMMUG00000024837	-0.146374	7.38005	1	1	94.83	95.79	98.51	50.53	102.81	25.33	81.97	129.17	135.94	147.84	85.19
ENSMMUG00000028527	-0.138472	7.12546	1	1	69.78	73.39	147.77	101.06	51.41	101.3	81.97	43.06	0	59.14	56.79
ENSMMUG00000027412	0.125806	6.83788	1	1	43.2	38.13	49.26	0	0	0	122.95	0	81.56	29.57	85.19
ENSMMUG00000035867	0.124171	6.99494	1	1	57.45	61	0	151.59	51.41	101.3	40.98	129.17	0	0	56.79
ENSMMUG00000037184	0.119329	6.85661	1	1	48.94	46.19	49.26	0	102.81	25.33	81.97	86.11	27.19	0	56.79
ENSMMUG00000027468	0.107944	7.19679	1	1	78.17	71.01	0	50.53	51.41	50.65	122.95	172.22	54.38	59.14	113.59
ENSMMUG00000027364	0.107066	6.83791	1	1	40.73	43.12	0	50.53	51.41	50.65	40.98	43.06	81.56	29.57	28.4
ENSMMUG00000027952	-0.0946421	7.17766	1	1	71.91	64.6	98.51	0	51.41	75.98	0	43.06	0	206.98	141.99
ENSMMUG00000027410	-0.0789469	6.51241	1	1	19.11	22.88	0	50.53	0	25.33	40.98	43.06	27.19	0	0
ENSMMUG00000025279	-0.0739595	6.7746	1	1	32.36	35.03	0	0	51.41	50.65	0	0	54.38	88.71	56.79
ENSMMUG00000025468	-0.0728719	6.52261	1	1	23.53	25.7	49.26	0	102.81	25.33	0	43.06	0	0	0
ENSMMUG00000026044	0.0718938	7.58386	1	1	122.32	125.05	0	101.06	205.62	101.3	163.93	258.33	81.56	29.57	170.38
ENSMMUG00000024169	-0.0703934	7.83003	1	1	150.87	153.72	98.51	151.59	51.41	177.28	204.91	172.22	135.94	206.98	170.38
ENSMMUG00000037326	-0.0654221	6.51994	1	1	23.53	22.88	49.26	50.53	0	25.33	40.98	43.06	0	0	0
ENSMMUG00000026093	0.0652725	7.06813	1	1	62.89	60.51	0	50.53	102.81	101.3	0	129.17	27.19	88.71	56.79
ENSMMUG00000036583	-0.0644711	6.50962	1	1	20.35	20.03	49.26	50.53	0	25.33	0	0	27.19	29.57	0
ENSMMUG00000033096	-0.0640277	6.51004	1	1	19.73	20.24	0	0	51.41	0	0	43.06	27.19	29.57	28.4
ENSMMUG00000032946	0.0568005	8.69392	1	1	337.34	330.56	147.77	454.78	102.81	607.82	409.83	344.44	217.5	354.82	369.17
ENSMMUG00000027385	-0.0547916	6.51935	1	1	24.14	20.49	49.26	0	0	0	81.97	43.06	0	0	28.4
ENSMMUG00000033003	-0.0504563	6.51757	1	1	24.14	20.24	49.26	0	51.41	0	0	43.06	0	29.57	28.4
ENSMMUG00000036216	-0.0441314	6.50371	1	1	20.6	14.78	49.26	0	0	25.33	0	0	0	59.14	28.4
ENSMMUG00000035653	-0.0439362	6.79785	1	1	44.75	37.66	147.77	50.53	0	75.98	40.98	0	0	59.14	0
ENSMMUG00000032878	-0.0401669	9.07636	1	1	467.51	470.1	344.79	353.72	514.05	379.89	450.81	731.95	625.33	561.81	255.58
ENSMMUG00000026634	-0.0379159	8.75407	1	1	366.15	370.47	640.32	353.72	411.24	379.89	450.81	258.33	353.45	266.12	198.78
ENSMMUG00000034121	-0.0337782	6.50911	1	1	23.53	14.78	49.26	0	0	25.33	0	43.06	0	59.14	0
ENSMMUG00000025722	-0.0305665	8.99331	1	1	443.15	441.24	443.3	303.19	462.65	405.22	614.74	645.83	380.63	384.39	340.77
ENSMMUG00000026295	0.0291881	8.93248	1	1	415.66	413.8	147.77	202.13	565.46	506.52	532.78	645.83	380.63	354.82	397.56
ENSMMUG00000033596	-0.0273976	8.22243	1	1	233.47	233.5	197.02	252.66	205.62	202.61	327.86	430.56	81.56	147.84	255.58
ENSMMUG00000033622	0.0222826	7.80224	1	1	159.46	148.22	295.53	202.13	154.22	25.33	0	86.11	163.13	236.55	227.18
ENSMMUG00000034909	0.0219975	7.46509	1	1	112.01	108.87	49.26	151.59	154.22	126.63	40.98	301.39	54.38	88.71	28.4
ENSMMUG00000024077	-0.0217825	6.78308	1	1	40.7	29.57	49.26	0	0	0	0	43.06	54.38	118.27	56.79
ENSMMUG00000024633	0.0189973	6.68025	1	1	26.07	35.73	0	50.53	51.41	75.98	40.98	0	54.38	0	0
ENSMMUG00000024536	0.0155177	8.2808	1	1	235.87	240.64	98.51	252.66	257.03	354.56	245.9	344.44	353.45	206.98	28.4
ENSMMUG00000026648	-0.0114426	8.43146	1	1	282.23	282.76	344.79	202.13	359.84	126.63	450.81	387.5	353.45	118.27	198.78
ENSMMUG00000025503	-0.0099018	9.3978	1	1	617.37	605.9	886.6	606.38	565.46	481.19	778.68	688.89	462.2	473.1	567.95
ENSMMUG00000033056	-0.00654467	8.12643	1	1	212.53	196.14	295.53	151.59	102.81	126.63	204.91	172.22	326.26	325.26	141.99
ENSMMUG00000024873	-0.0051034	6.92921	1	1	46.67	50.51	49.26	50.53	51.41	101.3	40.98	0	54.38	59.14	28.4
ENSMMUG00000033806	0.000933677	7.66514	1	1	139.9	123.67	147.77	50.53	102.81	126.63	163.93	258.33	81.56	177.41	85.19
ENSMMUG00000033033	0.000756584	9.51697	1	1	652.03	641.77	591.07	454.78	462.65	911.73	614.74	430.56	815.64	1034.91	511.15

[truncated: 6 more sheets: J. DE_smallRNA_Grp6_Grp5, K. PairedDE_smallRNA_Grp3_Grp1, L. PairedDE_smallRNA_Grp5_Grp1, M. PairedDE_smallRNA_Grp4_Grp2, N. PairedDE_smallRNA_Grp6_Grp2, Annotation and Software Informa]
