# Supplementary material for: Effects of Cardiac Sympathetic Neurodegeneration and PPARγ Activation on Rhesus Macaque Whole Blood miRNA and mRNA Expression Profiles
Source: Biomed Res Int. 2020 May 2;2020:9426204. doi: 10.1155/2020/9426204 (PMC7212295; doi:10.1155/2020/9426204)
Supplement: Supplementary 14 — Supplementary Table 13: list of uncorrected p values, FDR-corrected p values, and fold change for additional gene qPCR. [file 9426204.f8.xlsx]

## Sheet: Sheet1
Sample	Animal	Timepoint	Raw Reads	UMI-corrected Reads	miRNA	small RNA	pred-putative	pred-mirBase	Genome-mapped	Out- mapped	Un- mapped
1	Pioglitazone 2	1wk	10745134	9498558	8232328	20230	8133	2687	914085	5796	315299
2	Placebo 1	Baseline	11368222	9913743	8505792	32759	8568	5190	989497	4769	367168
3	Placebo 1	12wk	9448087	8525291	7250697	31818	8162	4068	921760	4290	304496
4	Pioglitazone 2	Baseline	10427796	9212268	8128809	16169	6764	2527	766932	6278	284789
5	Pioglitazone 2	12wk	11935134	10553719	9624614	24611	5374	2964	601536	5601	289019
6	Placebo 1	1wk	7598549	6434456	5413060	18397	6191	2766	720780	4356	268906
7	Pioglitazone 5	Baseline	14234389	12359775	11014870	45118	8306	5985	898078	8014	379404
8	Placebo 5	1wk	9438950	8198059	7033223	20857	8680	3378	809099	5108	317714
9	Pioglitazone 5	12wk	14343723	12234762	10869559	43663	7602	4301	912361	8155	389121
10	Placebo 5	Baseline	12471532	10444558	8734194	36698	10669	5129	1194077	7801	455990
11	Placebo 5	12wk	11023036	9289239	7688292	25792	10016	4513	1138328	6112	416186
12	Pioglitazone 5	1wk	13109018	10919553	9673528	45194	7204	5319	823663	8266	356379
13	Pioglitazone 4	Baseline	11290869	9697269	8279652	20386	9645	4087	999800	5627	378072
14	Placebo 2	1wk	11269402	10142354	8383687	24948	13023	3514	1337159	10226	369797
15	Placebo 2	12wk	11213793	9920638	8120660	17052	15175	4979	1366934	11717	384121
16	Pioglitazone 4	1wk	9755592	8804074	7610439	21901	9266	3550	822698	5201	331019
17	Pioglitazone 4	12wk	10620133	9443873	7943838	29561	9914	4631	1054364	8461	393104
18	Placebo 2	Baseline	10600071	9501369	7924708	21280	13243	3222	1186028	8696	344192
19	Pioglitazone 4	Baseline	14082025	11929772	10113781	42559	11894	7165	1273663	10581	470129
20	Placebo 3	Baseline	12003792	10697804	9456369	23900	8550	3363	885903	7583	312136
21	Pioglitazone 4	12wk	11572604	9615353	8184239	60949	8670	5933	988838	9781	356943
22	Placebo 3	1wk	11101344	9920179	8622301	13559	10044	3815	951700	5939	312821
23	Pioglitazone 4	1wk	12632342	11056681	9636262	36080	9418	4974	969959	8541	391447
24	Placebo 3	12wk	12827851	11446305	9989184	25268	10005	3744	1021704	7684	388716
25	Placebo 4	1wk	13647380	11771198	9779901	33853	13212	4536	1447947	8863	482886
26	Placebo 4	12wk	13113348	11298938	9495447	36620	13047	5968	1321658	7391	418807
27	Pioglitazone 1	Baseline	13886479	11556130	9820719	32610	13540	5236	1240109	7842	436074
28	Pioglitazone 1	1wk	14051693	12245110	10623128	32991	12697	3903	1155927	8392	408072
29	Pioglitazone 1	12wk	13387979	11954331	10461894	44256	11888	4110	1056688	8079	367416
30	Placebo 4	Baseline	11808173	10183576	8495261	30312	10763	4469	1216079	7484	419208
Average			1.18336e+07	1.02923e+07	8.83701e+06	30313	9988.77	4334.2	1.03291e+06	7421.13	370314
Percentage of UMI-corrected Reads					85.8605	0.294522	0.0970509	0.0421111	10.0358	0.0721038	3.59798
