# Supplementary material for: Effects of Cardiac Sympathetic Neurodegeneration and PPARγ Activation on Rhesus Macaque Whole Blood miRNA and mRNA Expression Profiles
Source: Biomed Res Int. 2020 May 2;2020:9426204. doi: 10.1155/2020/9426204 (PMC7212295; doi:10.1155/2020/9426204)
Supplement: Supplementary 15 — Supplementary Table 14: predicted mRNA targets of mml-miR-16-2-3p, mml-miR-204-5p, mml-miR-133d-3p, mml-miR-1262-5p, and mml-miR-146b-5p. [file 9426204.f9.xlsx]

## Sheet: Sample and Table Info
RNA Sample	Animal	Timepoint
1	Pioglitazone 2	1wk
2	Placebo 1	Baseline
3	Placebo 1	12wk
4	Pioglitazone 2	Baseline
5	Pioglitazone 2	12wk
6	Placebo 1	1wk
7	Pioglitazone 5	Baseline
8	Placebo 5	1wk
9	Pioglitazone 5	12wk
10	Placebo 5	Baseline
11	Placebo 5	12wk
12	Pioglitazone 5	1wk
13	Pioglitzone 4	Baseline
14	Placebo 2	1wk
15	Placebo 2	12wk
16	Pioglitazone 4	1wk
17	Pioglitazone 4	12wk
18	Placebo 2	Baseline
19	Pioglitazone 4	Baseline
20	Placebo 3	Baseline
21	Pioglitazone 4	12wk
22	Placebo 3	1wk
23	Pioglitazone 4	1wk
24	Placebo 3	12wk
25	Placebo 4	1wk
26	Placebo 4	12wk
27	Pioglitzone 1	Baseline
28	Pioglitazone 1	1wk
29	Pioglitazone 1	12wk
30	Placebo 4	Baseline

## Sheet: A. miRNA TPM
mirna_tpm
Name	Sequence	Name count	Identical miRNAs	1	2	3	4	5	6	7	8	9	10	11	12	13	14	15	16	17	18	19	20	21	22	23	24	25	26	27	28	29	30
mml-let-7a-2-3p	CTGTACAGCCTCCTAGCTTTCC	1	mml-let-7a-2-3p	0	0	0	0	0	0	0	0	0	0	0	0	0	0	0	0	0	0	0	0	0	0	0	0	0	0	0	0	0	0
mml-let-7a-3p	CTATACAATCTACTGTCTTTCC	1	mml-let-7a-3p	57	99	123	60	19	171	24	85	18	81	73	23	115	48	96	138	97	168	102	58	124	47	85	36	102	107	55	165	149	121
mml-let-7a-5p	TGAGGTAGTAGGTTGTATAGTT	3	mml-let-7a-5p	32412	24617	15958	33958	54903	18140	47992	19843	46165	24297	18146	51201	26381	13764	12580	22103	8112	9848	21462	42515	20676	37334	37168	42795	10643	8187	22932	25750	23300	12414
mml-let-7b-3p	CTATACAACCTACTGCCTTCCC	1	mml-let-7b-3p	22	41	58	23	3	71	8	60	5	49	50	11	70	77	74	70	51	80	64	26	85	23	46	19	64	70	39	51	31	76
mml-let-7b-5p	TGAGGTAGTAGGTTGTGTGGTT	1	mml-let-7b-5p	4384	3178	3354	8255	6813	3001	7184	3011	6362	4250	4618	9463	5717	1625	10823	3757	1326	3314	7981	4726	3522	5306	5499	12660	2725	3913	5161	3929	1810	4090
mml-let-7c-3p	CTGTACAACCTTCTAGCTTTCC	1	mml-let-7c-3p	0	0	0	0	0	0	0	0	0	0	0	0	0	0	0	0	0	0	0	0	0	0	0	0	0	0	0	0	0	0
mml-let-7c-5p	TGAGGTAGTAGGTTGTATGGTT	1	mml-let-7c-5p	124	96	68	133	199	78	204	95	203	104	97	227	120	59	101	89	38	55	153	204	129	203	200	260	69	62	117	107	95	69
mml-let-7d	AGAGGTAGTAGGTTGCATAGTT	1	mml-let-7d	3113	2234	1758	2662	4492	1683	4133	2115	5272	2452	1859	4455	2319	1126	1263	2395	1197	1087	2552	3661	2111	2772	4036	5011	1495	1301	3334	2641	2064	1620
mml-let-7e-3p	CTATACGGCCTCCTAGCTTTCC	1	mml-let-7e-3p	0	0	0	0	0	0	0	0	0	0	0	0	0	0	0	0	0	0	0	0	0	0	0	0	0	0	0	0	0	0
mml-let-7e-5p	TGAGGTAGGAGGTTGTATAGTT	1	mml-let-7e-5p	27	26	18	30	41	21	44	17	44	25	16	52	24	10	12	20	8	10	27	40	22	29	35	42	11	10	27	27	18	14
mml-let-7f-3p	CTATACAATCTATTGCCTTCCC	1	mml-let-7f-3p	16	35	50	17	3	60	9	48	5	27	27	5	48	33	40	50	47	50	38	19	42	19	35	11	41	48	26	65	52	40
mml-let-7f-5p	TGAGGTAGTAGATTGTATAGTT	2	mml-let-7f-5p	7712	5878	3132	9660	17644	4886	13379	4629	16456	5407	4607	15236	6121	2823	2258	4893	1536	1924	4547	9219	4106	9931	9301	8835	1746	1405	4705	7606	8586	2494
mml-let-7g-3p	CTGTACAGGCCACTGCCTTGCC	1	mml-let-7g-3p	2	3	2	3	1	4	2	3	1	2	1	2	3	1	4	3	4	5	2	2	3	2	1	2	2	4	1	2	2	2
mml-let-7g-5p	TGAGGTAGTAGTTTGTACAGTT	1	mml-let-7g-5p	6371	4177	2380	7330	14569	3541	8598	3502	10276	3270	2844	8974	4289	1480	1620	3433	1283	1435	2766	6919	2661	7757	5984	6609	1389	1034	2970	4151	3705	1462
mml-let-7i-3p	TGCGCAAGCTACTGCCTTGCT	1	mml-let-7i-3p	21	21	17	31	18	20	16	29	14	19	19	17	23	21	43	23	21	27	19	20	24	27	16	17	19	22	19	15	15	18
mml-let-7i-5p	TGAGGTAGTAGTTTGTGCTGTT	1	mml-let-7i-5p	11340	10552	7862	13112	21077	6185	15865	8862	14184	7321	6749	15560	9640	2268	4784	8042	1738	2977	6587	11705	4783	17948	12094	15803	2695	2324	7953	9510	5518	3051
mml-miR-1-1-5p	ACATACTTCTTTATATGCCCATA	1	mml-miR-1-1-5p	0	0	0	0	0	0	0	0	0	0	0	0	0	0	0	0	0	0	0	0	0	0	0	0	0	0	0	0	0	0
mml-miR-1-2-5p	ACATACTTCTTTATGTACCCATA	1	mml-miR-1-2-5p	0	0	0	0	0	0	0	0	0	0	0	0	0	0	0	0	0	0	0	0	0	0	0	0	0	0	0	0	0	0
mml-miR-1-3p	TGGAATGTAAAGAAGTATGTAT	2	mml-miR-1-3p	1	0	0	0	3	1	4	0	3	0	0	0	0	0	0	0	0	0	1	0	0	1	2	0	0	0	1	2	0	0
mml-miR-7	TGGAAGACTAGTGATTTTGTTGT	3	mml-miR-7	1589	1868	1718	2588	3286	1878	2758	1052	3101	1261	1131	2852	1470	412	1095	1459	410	662	2369	2183	1973	1904	3845	2208	553	778	977	2537	1871	828
mml-miR-9-3-3p	CTCAAGCTAGATAACCGAAAGT	1	mml-miR-9-3-3p	0	0	0	0	0	0	0	0	0	0	0	0	0	0	0	0	0	0	0	0	0	0	0	0	0	0	0	0	0	0
mml-miR-9-3p	ATAAAGCTAGATAACCGAAAGTA	2	mml-miR-9-3p	0	0	0	0	0	1	0	0	0	0	0	0	0	0	0	0	0	0	1	0	5	0	1	0	0	0	0	1	1	0
mml-miR-9-5p	TCTTTGGTTATCTAGCTGTATGA	3	mml-miR-9-5p	4	4	4	3	3	4	4	3	6	2	2	5	3	3	1	4	3	5	8	7	22	5	7	4	3	2	4	5	12	3
mml-miR-10a-3p	AAATTCGTATCTAGGGGAATA	1	mml-miR-10a-3p	0	0	0	0	0	0	0	0	0	0	0	0	0	0	0	0	0	0	0	0	0	0	0	0	0	0	0	0	0	0
mml-miR-10a-5p	TACCCTGTAGATCCGAATTTGTG	1	mml-miR-10a-5p	39	81	80	31	20	73	29	80	47	52	51	31	49	58	34	61	61	56	60	52	63	50	58	40	55	58	49	57	84	53
mml-miR-10b-3p	AGATTCGATTCTAGGGGAATA	1	mml-miR-10b-3p	0	0	0	0	0	0	0	0	0	0	0	0	0	0	0	0	0	0	0	0	0	0	0	0	0	0	0	0	0	0
mml-miR-10b-5p	TACCCTGTAGAACCGAATTTGTG	1	mml-miR-10b-5p	4	3	5	2	2	4	3	6	8	3	2	3	4	3	3	2	7	11	6	2	6	2	4	2	5	6	3	3	5	4
mml-miR-15a-3p	GCAGGCCATATTGTGCTGCCTCA	1	mml-miR-15a-3p	3	3	2	5	1	5	3	3	2	1	1	2	4	1	7	3	5	6	3	3	2	1	1	1	2	5	1	2	3	2
mml-miR-15a-5p	TAGCAGCACATAATGGTTTGTG	1	mml-miR-15a-5p	2609	2004	1551	2958	4456	1786	4169	1449	5162	1154	1029	3372	1903	416	869	1401	653	767	1331	2160	909	2052	2740	2777	614	680	1276	1694	1249	636
mml-miR-15b-3p	CGAATCATTATTTGCTGCTCTA	1	mml-miR-15b-3p	1700	3118	2772	1948	704	3557	1039	2908	723	1959	1745	797	2720	3632	4772	3239	3158	3045	2294	1734	2607	2576	1817	993	2426	2466	1684	2878	3020	2790
mml-miR-15b-5p	TAGCAGCACATCATGGTTTACA	1	mml-miR-15b-5p	9738	11156	10765	12079	24278	10396	16040	9696	18175	11652	9386	21828	8625	5572	4781	6334	5014	4778	9791	9519	12666	8413	10846	9958	5700	6745	8293	5463	6464	7820
mml-miR-16-1-3p	CCAGTATTAACTGTGCTGCTGAA	1	mml-miR-16-1-3p	4	5	6	9	7	5	9	6	4	1	3	5	6	1	15	4	1	5	6	3	3	7	4	4	1	4	1	4	3	2
mml-miR-16-2-3p	CCAATATTACTGTGCTGCTTCA	1	mml-miR-16-2-3p	66	70	105	132	23	91	43	214	32	41	59	29	114	116	862	139	97	273	286	43	79	194	96	69	104	279	50	73	79	73
mml-miR-16-5p	TAGCAGCACGTAAATATTGGCG	2	mml-miR-16-5p	132678	129074	100594	177001	252347	104698	220348	84990	224926	83443	73524	223244	104843	49573	41935	79776	35897	37911	78221	157354	76831	157083	131173	131830	34360	34143	73510	113568	113125	44644
mml-miR-17-3p	ACTGCAGTGAAGGCACTTGT	1	mml-miR-17-3p	6	3	4	6	5	2	5	8	8	3	3	4	4	1	14	5	7	6	7	4	4	7	7	7	5	10	5	2	3	4
mml-miR-17-5p	CAAAGTGCTTACAGTGCAGGTAGT	1	mml-miR-17-5p	321	323	320	380	607	271	556	292	551	211	187	443	347	113	188	258	111	137	223	378	172	453	376	406	111	149	184	269	176	109
mml-miR-18a-3p	ACTGCCCTAAGTGCTCCTTCTGGC	1	mml-miR-18a-3p	577	354	415	255	186	348	286	714	401	449	514	192	490	670	920	860	1071	992	556	288	315	468	613	685	1321	1023	901	415	477	834
mml-miR-18a-5p	TAAGGTGCATCTAGTGCAGATA	1	mml-miR-18a-5p	13	10	9	16	12	11	13	14	13	7	8	9	13	2	19	13	8	11	13	9	5	17	11	10	8	13	7	10	10	5
mml-miR-18b	TAAGGTGCATCTAGTGCAGTTAG	1	mml-miR-18b	23	21	15	25	29	19	38	21	41	12	12	25	28	6	19	24	13	16	21	20	10	28	25	26	7	15	12	16	16	9
mml-miR-19a-3p	TGTGCAAATCTATGCAAAACTGA	1	mml-miR-19a-3p	118	118	115	221	156	179	161	126	171	101	97	126	139	47	150	119	100	150	205	111	145	107	163	129	73	112	69	149	221	59
mml-miR-19a-5p	AGTTTTGCATAGTTGCACTAC	1	mml-miR-19a-5p	0	0	0	0	0	0	0	0	0	0	0	0	0	0	0	0	0	0	0	0	0	0	0	0	0	0	0	0	0	0
mml-miR-19b	TGTGCAAATCCATGCAAAACTGA	1	mml-miR-19b	3353	3975	4349	4467	2670	6329	2859	5129	3215	3783	3125	2439	4346	3443	4572	5155	5962	5891	5371	4648	7971	2600	4754	2446	4005	6138	2284	5916	7664	3766
mml-miR-20a-3p	ACTGCATTATGAGCACTTAAAGT	1	mml-miR-20a-3p	6	8	3	8	3	5	7	6	9	3	2	4	3	2	11	5	4	4	6	3	1	8	5	3	2	4	2	4	5	2
mml-miR-20a-5p	TAAAGTGCTTATAGTGCAGGTA	1	mml-miR-20a-5p	206	98	84	164	211	83	239	90	313	48	51	138	92	24	70	87	39	67	66	112	28	149	120	190	41	46	76	83	75	29
mml-miR-20b-3p	TACTGTAGTGTGGGCACTTCCAG	1	mml-miR-20b-3p	0	0	0	0	0	0	0	0	0	0	0	0	0	0	0	0	0	0	0	0	0	0	0	0	0	0	0	0	0	0
mml-miR-20b-5p	CAAAGTGCTCATAGTGCAGGTAG	1	mml-miR-20b-5p	22	28	21	28	40	19	35	17	30	16	13	23	28	5	6	26	11	7	22	26	16	21	33	23	4	6	15	22	23	5
mml-miR-21-3p	CAACACCAGTCGATGGGCTGTC	1	mml-miR-21-3p	1	2	1	1	1	2	1	2	1	1	1	1	2	0	1	1	1	1	2	1	0	1	1	1	1	2	0	1	1	0
mml-miR-21-5p	TAGCTTATCAGACTGATGTTGA	1	mml-miR-21-5p	629	503	347	636	643	506	698	320	1342	265	261	714	383	125	324	478	445	372	666	373	378	397	710	465	312	306	345	350	549	320
mml-miR-22	AAGCTGCCAGTTGAAGAACTGT	1	mml-miR-22	1249	1686	1513	833	852	1592	1950	1545	2058	830	669	1244	1115	1054	1481	1593	1845	1278	1169	846	1041	1256	1450	1175	1125	1429	1438	1055	924	718
mml-miR-23a-3p	ATCACATTGCCAGGGATTTCC	1	mml-miR-23a-3p	1606	3408	3124	1214	1320	2969	1403	3406	1918	2214	1863	1441	1839	2594	1632	2761	3134	2057	2341	1904	2877	1796	2724	1605	2789	2531	2341	2204	2878	2693
mml-miR-23a-5p	GGTTCCTGGGGATGGGATTT	1	mml-miR-23a-5p	0	0	0	0	0	0	0	0	0	0	0	0	0	0	0	0	0	0	0	0	0	0	0	0	0	0	0	0	0	0
mml-miR-23b-3p	ATCACATTGCCAGGGATTACC	1	mml-miR-23b-3p	666	1002	1084	601	468	968	459	1345	562	784	690	457	653	936	795	962	1127	788	1043	665	1090	721	950	568	795	1021	697	679	882	773
mml-miR-23b-5p	GGGTTCCTGGCATGCTGATTT	1	mml-miR-23b-5p	7	4	6	7	8	6	7	3	6	6	8	7	7	3	8	5	3	4	9	6	5	11	6	6	3	5	6	4	5	4
mml-miR-24-3p	TGGCTCAGTTCAGCAGGAACAG	2	mml-miR-24-3p	602	1013	765	505	831	845	954	1046	921	643	560	853	765	550	807	908	915	586	734	644	866	1065	919	614	655	842	637	646	684	679
mml-miR-24-5p	GTGCCTACTGAGCTGATATCAGT	1	mml-miR-24-5p	0	0	0	0	0	0	0	0	0	0	0	0	0	0	0	0	0	0	0	0	0	0	0	0	0	0	0	0	0	0
mml-miR-25	CATTGCACTTGTCTCGGTCTGA	1	mml-miR-25	50729	57955	57427	62291	71835	49904	63792	54240	48305	49911	46154	64413	69975	65155	45865	65320	66328	45945	50913	64965	67786	63453	55895	56556	44289	44702	50136	56134	67178	60318
mml-miR-26a-1-3p	CCTATTCTTGGTTACTTGCACG	1	mml-miR-26a-1-3p	5	7	8	4	2	8	2	6	2	4	3	2	5	12	3	4	5	5	2	5	4	5	2	2	3	4	4	5	8	4
mml-miR-26a-2-3p	CCTATTCTTGATTACTTGTTTC	1	mml-miR-26a-2-3p	12	13	12	13	6	15	4	9	5	12	12	4	10	7	9	12	8	23	8	11	11	9	9	6	7	6	9	16	21	9
mml-miR-26a-5p	TTCAAGTAATCCAGGATAGGCT	2	mml-miR-26a-5p	4813	3622	2772	3774	5011	3490	4850	3188	6968	2552	2124	4712	1991	2808	1752	2972	4277	2592	2998	3459	3296	3115	4031	3768	2607	1898	3366	2572	4557	2660
mml-miR-26b-3p	CCTGTTCTCCATTACTTGGCT	1	mml-miR-26b-3p	39	83	74	32	36	90	27	76	33	82	75	37	71	78	41	66	59	68	40	52	59	44	46	38	66	51	67	63	59	79
mml-miR-26b-5p	TTCAAGTAATTCAGGATAGGT	1	mml-miR-26b-5p	1682	1611	1092	2173	5414	1266	3615	1641	4403	1747	1491	4255	1616	1057	505	1368	680	606	1278	2049	1156	2793	2403	2307	596	411	1113	1561	1839	742
mml-miR-27a-3p	TTCACAGTGGCTAAGTTCCGCC	1	mml-miR-27a-3p	42	108	73	57	41	130	58	82	66	61	52	68	82	23	65	66	81	59	81	70	117	62	70	42	72	73	59	72	76	89
mml-miR-27a-5p	AGGGCTTAGCTGCTTGTGAGCA	1	mml-miR-27a-5p	0	1	0	1	1	0	2	1	3	0	0	2	1	0	0	1	0	0	1	0	0	0	1	0	0	1	1	0	0	0
mml-miR-27b-3p	TTCACAGTGGCTAAGTTCTGC	1	mml-miR-27b-3p	217	322	263	306	346	349	299	269	322	243	208	363	242	168	171	256	242	175	259	240	325	302	302	168	165	156	176	215	340	251
mml-miR-27b-5p	AGAGCTTAGCTGATTGGTGAACA	1	mml-miR-27b-5p	0	0	0	0	0	0	0	0	0	0	0	0	0	0	0	0	0	0	0	0	0	0	0	0	0	0	0	0	0	0
mml-miR-28-3p	CACTAGATTGTGAGCTCCTGGA	1	mml-miR-28-3p	105	217	192	106	120	203	107	175	113	192	168	169	171	301	109	158	170	160	186	175	358	163	184	111	171	151	170	165	246	233
mml-miR-28-5p	AAGGAGCTCACAGTCTATTGAG	1	mml-miR-28-5p	2	2	1	1	1	2	1	1	4	1	1	2	2	0	1	2	3	2	3	1	2	0	3	3	1	3	2	1	1	2
mml-miR-29a-3p	CTAGCACCATCTGAAATCGGTT	1	mml-miR-29a-3p	143	218	181	159	173	192	240	176	248	165	140	330	183	58	70	139	145	91	209	131	452	54	200	105	135	195	153	119	170	198
mml-miR-29a-5p	CTGATTTCTTTTGGTGTTCAGA	1	mml-miR-29a-5p	0	0	0	0	0	0	0	0	0	0	0	0	0	0	0	0	0	0	0	0	0	0	0	0	0	0	0	0	0	0
mml-miR-29b-1-5p	AGCTGGTTTCATATGGTGGTTTAGA	1	mml-miR-29b-1-5p	0	0	0	0	0	0	0	0	0	0	0	0	0	0	0	0	0	0	0	0	0	0	0	0	0	0	0	0	0	0
mml-miR-29b-2-5p	AGCTGGTTTCACATGGTGGCTTAGA	1	mml-miR-29b-2-5p	15	14	14	19	25	11	30	16	24	12	11	27	17	11	22	17	10	8	16	21	14	36	20	24	9	13	17	16	16	9
mml-miR-29b-3p	TAGCACCATTTGAAATCAGTGTT	2	mml-miR-29b-3p	221	209	190	310	264	263	227	145	263	153	133	256	217	179	142	226	208	238	183	378	304	215	202	220	184	190	170	337	456	254
mml-miR-29c-3p	TAGCACCATTTGAAATCGGTTA	1	mml-miR-29c-3p	499	424	327	850	698	485	986	339	907	252	290	923	645	92	390	379	240	275	459	548	452	420	519	546	158	289	321	482	444	232
mml-miR-29c-5p	CCGATTTCTCCTGGTGTTCAG	1	mml-miR-29c-5p	47	56	54	26	24	52	32	78	37	44	51	25	74	83	64	89	104	93	52	50	63	49	56	40	83	72	54	69	72	72
mml-miR-30a-3p	CTTTCAGTCGGATGTTTGCAGC	1	mml-miR-30a-3p	12	36	29	14	13	31	26	22	20	19	18	22	14	10	9	14	12	10	28	29	37	26	35	17	14	12	25	34	51	17
mml-miR-30a-5p	TGTAAACATCCTCGACTGGAAG	1	mml-miR-30a-5p	35	166	129	42	24	164	81	104	73	86	71	82	55	23	13	51	64	26	142	129	230	90	105	54	45	47	162	192	335	52
mml-miR-30b-3p	CTGGGAGGTGGATGTTTACTTC	1	mml-miR-30b-3p	0	1	1	0	0	1	0	1	1	1	1	1	1	0	2	1	0	0	2	0	1	1	1	1	0	1	1	0	0	0
mml-miR-30b-5p	TGTAAACATCCTACACTCAGC	1	mml-miR-30b-5p	957	1429	1933	993	676	2072	689	1403	779	973	984	598	1592	1388	1025	1618	1615	1720	1082	1531	1597	871	1211	816	1191	1392	854	2043	2279	1229
mml-miR-30c-1-3p	TGGGAGAGGGTTGTTTACTCC	1	mml-miR-30c-1-3p	23	26	24	27	26	25	29	36	19	29	28	27	36	28	53	28	24	24	34	20	41	39	30	21	22	29	25	25	18	24
mml-miR-30c-2-3p	TGGGAGAAGGCTGTTTACTCT	1	mml-miR-30c-2-3p	0	3	3	1	1	3	3	3	1	3	2	3	2	0	0	1	0	0	7	2	6	3	5	2	1	1	4	3	4	1
mml-miR-30c-5p	TGTAAACATCCTACACTCTCAGC	2	mml-miR-30c-5p	7687	10327	12952	7679	5663	12565	5319	11768	5405	8660	8206	4919	11161	16140	8072	12065	12098	11973	8886	11350	13187	6714	9421	6353	10143	11186	7427	15021	14276	10902
mml-miR-30d-3p	TTTCAGTCAGATGTTTGCTGC	1	mml-miR-30d-3p	8	12	8	10	13	9	11	5	9	6	4	10	7	3	8	9	7	7	7	7	7	9	10	7	4	5	5	7	11	7
mml-miR-30d-5p	TGTAAACATCCCCGACTGGAAG	1	mml-miR-30d-5p	6112	9812	8629	6499	3528	8777	4566	8954	4747	7282	6704	5837	7959	9376	7144	8263	9802	8348	8168	7457	10571	6865	5828	4610	7013	8329	7470	7590	9438	8550
mml-miR-30e-3p	TTTCAGTCGGATGTTTACAGC	1	mml-miR-30e-3p	228	322	332	269	191	360	207	279	180	247	244	193	330	376	312	347	301	381	252	280	361	254	278	154	285	275	183	310	532	363
mml-miR-30e-5p	TGTAAACATCCTTGACTGGAAG	1	mml-miR-30e-5p	1106	1383	1149	1522	835	1615	1009	1324	1077	785	787	875	1283	938	1425	1323	1867	1689	1351	1050	1464	1049	953	689	955	1201	858	1237	2076	1051
mml-miR-31-3p	GCTATGCCAACATATTGCCATC	1	mml-miR-31-3p	0	0	0	0	0	0	0	0	0	0	0	0	0	0	0	0	0	0	0	0	0	0	0	0	0	0	0	0	0	0
mml-miR-31-5p	GGCAAGATGCTGGCATAGCTG	1	mml-miR-31-5p	1	3	2	0	1	0	2	2	2	1	0	1	0	0	1	1	1	1	2	1	5	1	4	1	0	1	0	0	0	0
mml-miR-32-3p	AATTTAGTGTGTGTGATATT	1	mml-miR-32-3p	0	0	0	0	1	0	0	0	1	0	0	0	0	0	0	0	0	0	0	0	0	0	0	0	0	0	0	0	0	0
mml-miR-32-5p	TATTGCACATTACTAAGTTGC	1	mml-miR-32-5p	21	12	8	29	16	16	13	7	21	6	7	13	8	2	9	10	6	18	14	12	5	12	10	15	8	5	8	9	16	9
mml-miR-33a	GTGCATTGTAGTTGCATTG	1	mml-miR-33a	0	1	0	3	0	0	0	1	0	0	1	1	1	0	4	0	0	3	3	1	1	1	1	0	0	1	0	1	1	0
mml-miR-33b-3p	GTGCCTCGGCAGTGCAGCCC	1	mml-miR-33b-3p	0	0	0	0	0	0	0	0	0	0	0	0	0	0	0	0	0	0	0	0	0	0	0	0	0	0	0	0	0	0
mml-miR-33b-5p	GTGCATTGCTGTTGCATTGC	1	mml-miR-33b-5p	0	1	2	4	1	1	2	3	1	1	1	1	2	0	7	2	0	1	2	0	1	1	1	1	1	4	1	1	0	0
mml-miR-34a-3p	AATCAGCAAGTATACTGCCCTA	1	mml-miR-34a-3p	0	0	0	0	0	0	0	0	0	0	0	0	0	0	0	0	0	0	0	0	0	0	0	0	0	0	0	0	0	0
mml-miR-34a-5p	TGGCAGTGTCTTAGCTGGTTGT	1	mml-miR-34a-5p	53	113	50	72	286	63	168	95	197	65	49	198	64	21	30	65	34	21	72	68	57	104	139	80	53	52	104	85	48	63
mml-miR-34b	CAATCACTAACTCCACTGCCAT	1	mml-miR-34b	0	0	0	0	0	0	0	0	0	0	0	0	0	0	0	0	0	0	0	0	0	0	0	0	0	0	0	0	0	0
mml-miR-34c-3p	AATCACTAACCACACGGCCAGG	1	mml-miR-34c-3p	0	0	0	0	0	0	0	0	0	0	0	0	0	0	0	0	0	0	0	0	0	0	0	0	0	0	0	0	0	0
mml-miR-34c-5p	AGGCAGTGTAGTTAGCTGATTGC	1	mml-miR-34c-5p	0	0	0	0	0	0	0	0	0	0	0	0	0	0	0	0	0	0	0	0	0	0	0	0	0	0	0	0	0	0
mml-miR-92a-3p	TATTGCACTTGTCCCGGCCTGT	1	mml-miR-92a-3p	117803	79153	90485	84759	64742	84334	79854	100510	91127	106660	119016	79155	82015	114740	112227	91776	127070	120975	108829	77320	82192	89911	87314	119692	151435	122287	145157	61738	96306	134154
mml-miR-92a-5p	GGGTGGGGATTTGTTGCATTACT	1	mml-miR-92a-5p	0	0	0	0	0	0	0	0	0	0	0	0	0	0	0	0	0	0	0	0	0	0	0	0	0	0	0	0	0	0
mml-miR-92b-3p	TATTGCACTCGTCCCGGCCTCC	1	mml-miR-92b-3p	88	162	206	55	32	167	67	113	94	112	145	53	144	306	294	212	183	355	123	117	93	158	121	244	306	236	394	192	291	241
mml-miR-92b-5p	AGGGACGGGACGCGGTGCAGTGTT	1	mml-miR-92b-5p	0	1	1	1	0	1	1	1	0	1	1	1	3	1	3	1	1	2	2	2	3	1	1	3	2	3	4	2	2	2
mml-miR-93-3p	ACTGCTGAGCTAGCACTTCCCG	1	mml-miR-93-3p	1526	1382	1568	814	501	982	836	2528	693	1212	1220	415	1482	2362	2489	2714	2432	2931	1415	940	922	1760	1353	1046	2007	2192	1244	1479	1388	1440
mml-miR-93-5p	AAAGTGCTGTTCGTGCAGGTAG	1	mml-miR-93-5p	38458	46774	36534	49775	71921	27742	72263	30875	51355	25707	22726	63824	41911	10924	18205	31616	10808	12264	28332	54633	21651	57036	43639	50130	11600	12788	24687	37793	25975	12543
mml-miR-95-3p	TTCAACGGGTATTTATTGAGCA	1	mml-miR-95-3p	0	2	0	0	1	0	6	0	4	0	0	4	1	0	0	0	0	0	0	1	0	1	1	1	0	0	0	0	0	0
mml-miR-95-5p	TCAATAAATGTCTGTTGAATT	1	mml-miR-95-5p	0	0	0	0	0	0	0	0	0	0	0	0	0	0	0	0	0	0	0	0	0	0	0	0	0	0	0	0	0	0
mml-miR-96	TTTGGCACTAGCACATTTTTGC	1	mml-miR-96	0	0	1	0	0	0	2	1	4	1	0	1	1	0	2	1	1	1	2	1	1	2	2	1	0	1	1	0	0	0
mml-miR-98	TGAGGTAGTAAGTTGTATTGTT	1	mml-miR-98	87	63	38	82	150	47	129	63	208	58	54	138	64	32	23	59	23	22	55	92	40	120	125	101	24	16	58	69	84	26
mml-miR-99a-3p	AAGCTCGCTTCTATGGGTCTG	1	mml-miR-99a-3p	0	0	0	0	0	0	0	0	0	0	0	0	0	0	0	0	0	0	0	0	0	0	0	0	0	0	0	0	0	0
mml-miR-99a-5p	AACCCGTAGATCCGATCTTGTG	1	mml-miR-99a-5p	26	15	16	18	13	12	14	29	24	17	15	11	8	19	19	19	25	29	59	55	54	49	57	56	33	32	20	19	28	34
mml-miR-99b-3p	AAGCTCGTGTCTGTGGGTCCG	1	mml-miR-99b-3p	0	0	0	0	0	0	0	0	0	0	0	0	0	0	0	0	0	0	0	0	0	0	0	0	0	0	0	0	0	0
mml-miR-99b-5p	CACCCGTAGAACCGACCTTGCG	1	mml-miR-99b-5p	44	61	69	46	32	54	30	45	21	40	32	41	35	65	53	35	30	49	96	54	125	46	92	30	48	57	47	63	67	49
mml-miR-100-3p	AAGCTTGTGTCTATAGGTATG	1	mml-miR-100-3p	0	0	0	0	0	0	0	0	0	0	0	0	0	0	0	0	0	0	0	0	0	0	0	0	0	0	0	0	0	0
mml-miR-100-5p	AACCCGTAGATCCGAACTTGTG	1	mml-miR-100-5p	1	0	0	0	0	1	1	1	4	1	0	1	0	1	0	2	2	2	1	0	2	0	1	0	3	4	1	0	2	2
mml-miR-101-1-5p	TCAGTTATCACAGTGCTGATGCT	1	mml-miR-101-1-5p	2	0	0	3	2	0	3	1	2	0	0	1	1	0	4	1	1	1	1	1	1	0	2	1	0	0	0	1	0	0
mml-miR-101-2-5p	TCGGTTATCATGGTACCGATGCT	1	mml-miR-101-2-5p	0	0	0	0	0	0	0	0	0	0	0	0	0	0	0	0	0	0	0	0	0	0	0	0	0	0	0	0	0	0
mml-miR-101-3p	TACAGTACTGTGATAACTGAAG	2	mml-miR-101-3p	722	590	420	1343	1455	671	1490	478	1621	415	465	1534	739	108	560	465	192	393	681	496	417	555	768	687	133	238	339	548	521	161
mml-miR-103-3p	AGCAGCATTGTACAGGGCTATGA	2	mml-miR-103-3p	6092	6353	4785	5957	8159	4278	11653	5392	11105	3543	3094	10129	4841	2299	7712	4532	3102	3306	7418	5085	5153	8463	7401	5917	2640	4232	4943	4433	4479	2869
mml-miR-103-5p	TCGGCTTCTTTACAGTGCTGCCTTG	1	mml-miR-103-5p	0	0	0	0	0	0	0	0	0	0	0	0	0	0	0	0	0	0	0	0	0	0	0	0	0	0	0	0	0	0
mml-miR-105-3p	ACGGATGTTTGAGCATGTGCTA	2	mml-miR-105-3p	0	0	0	0	0	0	0	0	0	0	0	0	0	0	0	0	0	0	0	0	0	0	0	0	0	0	0	0	0	0
mml-miR-105-5p	TCAAATGCTCAGACTCCTGTGGT	2	mml-miR-105-5p	0	0	0	0	0	0	0	0	0	0	0	0	0	0	0	0	0	0	0	0	0	0	0	0	0	0	0	0	0	0
mml-miR-106a-3p	ACTGCAATGCAAGCACTTCTTAC	1	mml-miR-106a-3p	0	0	0	0	0	0	0	0	0	0	0	0	0	0	0	0	0	0	0	0	0	0	0	0	0	0	0	0	0	0
mml-miR-106a-5p	AAAAGTGCTTACAGTGCAGGTAGC	1	mml-miR-106a-5p	64	57	51	75	127	50	118	56	110	42	34	86	71	17	29	48	19	23	40	77	28	85	75	84	23	30	33	51	35	18
mml-miR-106b-3p	ACCGCACTGTGGGTACTTGCTG	1	mml-miR-106b-3p	2840	1971	1894	2040	1458	1662	2822	2986	3142	2195	2048	2476	2247	1887	3924	2675	2730	2331	2781	1823	1918	3301	2736	3196	2342	2847	3213	1397	1626	2407
mml-miR-106b-5p	TAAAGTGCTGACAGTGCAGAT	1	mml-miR-106b-5p	102	72	66	92	145	61	152	58	182	39	37	100	91	15	45	63	27	36	41	81	26	73	81	121	36	45	54	56	38	29
mml-miR-107-3p	AGCAGCATTGTACAGGGCTATCA	1	mml-miR-107-3p	267	247	202	252	297	191	440	251	414	142	119	362	190	98	390	195	159	166	346	187	257	330	295	207	120	204	179	149	166	129
mml-miR-107-5p	AGCTTCTTTACAGTGTTGCCTTG	1	mml-miR-107-5p	0	0	0	0	0	0	0	0	0	0	0	0	0	0	0	0	0	0	0	0	0	0	0	0	0	0	0	0	0	0
mml-miR-122a-3p	ACGCCATTATCACACTAAATA	1	mml-miR-122a-3p	0	0	0	0	0	0	0	0	0	0	0	0	0	0	0	0	0	0	0	0	0	0	0	0	0	0	0	0	0	0
mml-miR-122a-5p	TGGAGTGTGACAATGGTGTTTG	1	mml-miR-122a-5p	336	10	5	13	576	39	75	38	140	81	113	72	20	7	11	32	52	49	142	57	21	16	30	67	25	13	32	11	10	14
mml-miR-124a-3p	TTAAGGCACGCGGTGAATGCCA	2	mml-miR-124a-3p	0	0	0	0	0	0	0	0	0	0	0	0	0	0	0	0	0	0	0	0	0	0	0	0	0	0	0	0	0	0
mml-miR-124a-5p	GTTCACAGCGGACCTTGAT	2	mml-miR-124a-5p	0	0	0	0	0	0	0	0	0	0	0	0	0	0	0	0	0	0	0	0	0	0	0	0	0	0	0	0	0	0
mml-miR-125a-3p	ACAGGTGAGGTTCTTGGGAGCC	1	mml-miR-125a-3p	0	0	0	0	0	0	0	0	0	0	0	0	0	0	0	0	0	0	0	0	0	0	0	0	0	0	0	0	0	0
mml-miR-125a-5p	TCCCTGAGACCCTTTAACCTGTGA	1	mml-miR-125a-5p	352	355	442	365	256	362	204	386	169	396	360	245	265	535	388	235	221	457	648	336	739	432	550	257	304	318	326	435	454	333
mml-miR-125b-1-3p	ACGGGTTAGGCTCTTGGGAGCT	1	mml-miR-125b-1-3p	0	0	0	0	0	0	0	0	0	0	0	0	0	0	0	0	0	0	0	0	0	0	0	0	0	0	0	0	0	0
mml-miR-125b-2-3p	ACAAGTCAGGCTCTTGGGACCT	1	mml-miR-125b-2-3p	0	0	0	0	0	0	0	0	0	0	0	0	0	0	0	0	0	0	0	0	0	0	0	0	0	0	0	0	0	0
mml-miR-125b-5p	TCCCTGAGACCCTAACTTGTGA	2	mml-miR-125b-5p	393	331	395	493	388	253	335	549	244	392	382	262	283	638	474	280	258	560	953	1276	1074	1951	830	914	317	359	288	540	609	387
mml-miR-126	TCGTACCGTGAGTAATAATGCG	1	mml-miR-126	1400	1119	700	1605	3002	979	1648	777	2149	587	553	1948	600	279	256	373	193	247	870	1213	510	1751	1273	891	149	118	438	682	720	163
mml-miR-127-3p	TCGGATCCGTCTGAGCTTGGCT	1	mml-miR-127-3p	4	6	7	4	4	5	6	5	3	1	2	7	5	1	3	2	3	2	8	3	6	8	6	2	1	1	4	2	4	1
mml-miR-127-5p	TGAAGCTCAGAGGGCTCTGATT	1	mml-miR-127-5p	0	0	0	0	0	0	0	0	0	0	0	0	0	0	0	0	0	0	0	0	0	0	0	0	0	0	0	0	0	0
mml-miR-128a-3p	TCACAGTGAACCGGTCTCTTTT	1	mml-miR-128a-3p	2322	4382	4353	2665	1877	4047	1801	3984	1603	3339	2858	1988	4483	5297	3153	5068	4632	4045	3425	3767	5024	2547	3089	1985	3252	3481	2840	4221	4446	4412
mml-miR-128a-5p	CGGGGCCGTAGCACTGTCTGAGA	1	mml-miR-128a-5p	0	1	0	1	1	1	1	0	1	1	0	1	2	1	0	1	0	0	1	0	1	1	0	1	0	1	1	1	0	1
mml-miR-128b-3p	TCACAGTGAACCGGTCTCTTT	1	mml-miR-128b-3p	2087	3648	3714	2340	1623	3378	1496	3313	1363	2732	2342	1598	3929	4616	2788	4494	4119	3583	2794	3318	4177	2245	2529	1749	2869	3075	2522	3696	4016	3911
mml-miR-128b-5p	GGGGGCCGATACACTGTACGAGA	1	mml-miR-128b-5p	0	0	0	0	0	0	0	0	0	0	0	0	0	0	0	0	0	0	0	0	0	0	0	0	0	0	0	0	0	0
mml-miR-129-1-3p	AAGCCCTTACCCCAAAAAGTAT	1	mml-miR-129-1-3p	0	0	0	0	0	0	0	0	0	0	0	0	0	0	0	0	0	0	0	0	0	0	0	0	0	0	0	0	0	0
mml-miR-129-2-3p	AAGCCCTTACCCCAAAAAGCA	1	mml-miR-129-2-3p	0	0	0	0	0	0	0	0	0	0	0	0	0	0	0	0	0	0	0	0	0	0	0	0	0	0	0	0	0	0
mml-miR-129-5p	CTTTTTGCGGTCTGGGCTTGC	2	mml-miR-129-5p	0	0	0	0	0	0	0	0	0	0	0	0	0	0	0	0	0	0	0	0	0	0	0	0	0	0	0	0	0	0
mml-miR-130a-3p	CAGTGCAATGTTAAAAGGGC	1	mml-miR-130a-3p	12	11	13	17	27	9	20	10	18	10	8	19	7	6	5	7	5	4	10	23	8	15	14	16	5	7	6	10	8	8
mml-miR-130a-5p	GCTCTTTTCACATTGTGCTACT	1	mml-miR-130a-5p	0	0	0	0	0	0	0	0	0	0	0	0	0	0	0	0	0	0	0	0	0	0	0	0	0	0	0	0	0	0
mml-miR-130b-3p	CAGTGCAATGATGAAAGGGCAT	1	mml-miR-130b-3p	34	26	28	43	63	17	44	25	35	24	18	43	22	16	15	25	14	12	20	56	24	41	26	47	13	19	16	26	25	20
mml-miR-130b-5p	ACTCTTTCCCTGTTGCACTACT	1	mml-miR-130b-5p	57	44	51	40	26	45	29	76	27	53	50	26	55	52	67	68	51	73	46	43	32	68	51	71	82	81	59	37	38	71
mml-miR-132-3p	TAACAGTCTACAGCCATGGTCG	1	mml-miR-132-3p	7	6	5	5	5	5	7	9	11	5	4	4	4	4	3	6	12	6	11	4	8	4	12	6	5	8	6	4	5	5
mml-miR-132-5p	ACCGTGGCTTTCGATTGTTACT	1	mml-miR-132-5p	0	0	0	1	0	0	0	0	1	0	0	0	0	0	0	0	0	0	0	0	0	0	1	0	0	1	0	0	0	0
mml-miR-133a	TTGTCCCCTTCAACCAGCTGT	1	mml-miR-133a	0	0	0	0	0	0	0	0	0	0	0	0	0	0	0	0	0	0	0	0	0	0	0	0	0	0	0	0	0	0
mml-miR-133b-3p	TTTGGTCCCCTTCAACCAGCTA	1	mml-miR-133b-3p	0	0	0	0	0	0	0	0	0	1	0	0	0	0	0	0	0	2	0	0	0	1	0	0	0	0	0	0	0	0
mml-miR-133b-5p	TGGTCAAACGGAACCAAGTC	1	mml-miR-133b-5p	0	0	0	0	0	0	0	0	0	0	0	0	0	0	0	0	0	0	0	0	0	0	0	0	0	0	0	0	0	0
mml-miR-133c-3p	TTTGGTCCCCTTCAACCAGCTG	1	mml-miR-133c-3p	6	5	4	6	4	13	11	4	3	20	3	0	8	9	6	1	16	48	3	3	3	15	12	2	6	3	10	15	7	2
mml-miR-133c-5p	AGCTGGTAAAATGGAACCAAAT	1	mml-miR-133c-5p,mml-miR-133d-5p	0	0	0	0	0	0	0	0	0	0	0	0	0	0	0	0	0	0	0	0	0	0	0	0	0	0	0	0	0	0
mml-miR-133d-3p	TTGGTCCCCTTCAACCAGCTGT	1	mml-miR-133d-3p	10	13	7	14	9	33	25	8	6	55	6	1	16	17	13	3	41	84	6	8	9	29	24	3	12	5	18	37	13	6
mml-miR-133d-5p	AGCTGGTAAAATGGAACCAAAT	1	mml-miR-133c-5p,mml-miR-133d-5p	0	0	0	0	0	0	0	0	0	0	0	0	0	0	0	0	0	0	0	0	0	0	0	0	0	0	0	0	0	0
mml-miR-134-3p	CCTGTGGGCCACCTAGTCACCAA	1	mml-miR-134-3p	0	0	0	0	0	0	0	0	0	0	0	0	0	0	0	0	0	0	0	0	0	0	0	0	0	0	0	0	0	0
mml-miR-134-5p	TGTGACTGGTTGACCAGAGGGG	1	mml-miR-134-5p	27	48	51	33	40	38	38	37	29	20	18	52	27	15	21	24	20	10	33	32	34	63	47	33	12	12	21	22	21	16
mml-miR-135a-1-3p	ATATAGGGATTGGAGCCGTGGC	1	mml-miR-135a-1-3p	0	0	0	0	0	0	0	0	0	0	0	0	0	0	0	0	0	0	0	0	0	0	0	0	0	0	0	0	0	0
mml-miR-135a-2-3p	ATGTAGGGATGGAAGCCATGAA	1	mml-miR-135a-2-3p	0	0	0	0	0	0	0	0	0	0	0	0	0	0	0	0	0	0	0	0	0	0	0	0	0	0	0	0	0	0
mml-miR-135a-5p	TATGGCTTTTTATTCCTATGTGA	2	mml-miR-135a-5p	5	1	1	3	2	2	1	1	2	0	0	1	1	1	1	2	3	3	0	1	1	1	1	2	2	2	1	1	0	3
mml-miR-135b-3p	ATGTAGGGCTAAAAGCCATGGG	1	mml-miR-135b-3p	0	0	0	0	0	0	0	0	0	0	0	0	0	0	0	0	0	0	0	0	0	0	0	0	0	0	0	0	0	0
mml-miR-135b-5p	TATGGCTTTTCATTCCTATGTGA	1	mml-miR-135b-5p	0	0	0	0	0	0	0	0	0	0	0	0	0	0	0	0	0	0	0	0	0	0	0	0	0	0	0	0	0	0
mml-miR-136	ACTCCATTTGTTTTGATGATGGA	1	mml-miR-136	0	0	1	0	0	2	0	0	1	0	0	0	0	0	0	1	0	0	1	0	0	0	1	0	0	0	0	0	0	0
mml-miR-137-3p	TTATTGCTTAAGAATACGCGTAG	1	mml-miR-137-3p	0	0	0	0	0	0	0	0	0	0	0	0	0	0	0	0	0	0	0	0	0	0	0	0	0	0	0	0	0	0
mml-miR-137-5p	ACGGGTATTCTTGGGTGGATAATA	1	mml-miR-137-5p	0	0	0	0	0	0	0	0	0	0	0	0	0	0	0	0	0	0	0	0	0	0	0	0	0	0	0	0	0	0
mml-miR-138-3p	TATTTCACGACACCAGGGTT	1	mml-miR-138-3p	5	5	8	8	5	6	5	10	3	9	10	6	6	6	9	6	6	3	12	5	14	5	10	4	5	7	6	6	6	7
mml-miR-138-5p	AGCTGGTGTTGTGAATCAGGCCG	1	mml-miR-138-5p	6	7	7	5	9	5	13	10	13	2	4	7	5	2	11	8	4	3	11	3	4	7	16	7	2	4	5	3	4	2
mml-miR-139-3p	GGAGACGCGGCCCTGTTGGAGT	1	mml-miR-139-3p	0	0	0	0	0	0	0	0	1	0	1	0	0	0	0	0	0	0	1	0	0	0	0	0	0	0	0	0	0	0
mml-miR-139-5p	TCTACAGTGCACGTGTCTCCAG	1	mml-miR-139-5p	0	1	1	0	0	1	0	1	2	1	1	1	1	1	0	0	0	1	2	3	2	2	2	1	2	1	1	1	2	1
mml-miR-140-3p	TACCACAGGGTAGAACCACGG	1	mml-miR-140-3p	6695	8794	10211	7762	4565	9425	4920	10091	4325	7854	6692	5699	8998	9327	8469	9815	11306	9377	8643	8052	12019	5366	6385	4593	7123	10314	6693	9791	10120	8146
mml-miR-140-5p	CAGTGGTTTTACCCTATGGTAG	1	mml-miR-140-5p	67	81	51	93	75	84	107	68	96	38	43	84	96	25	78	80	55	70	62	52	61	89	73	49	34	43	40	63	74	47
mml-miR-141-3p	AACACTGTCTGGTAAAGATGG	1	mml-miR-141-3p	0	0	0	0	0	0	1	0	3	0	0	0	0	0	0	0	0	0	2	0	0	0	1	1	0	0	0	0	0	0
mml-miR-141-5p	TCTTCCAGTACAGTGTTGGA	1	mml-miR-141-5p	0	0	0	0	0	0	0	0	0	0	0	0	0	0	0	0	0	0	0	0	0	0	0	0	0	0	0	0	0	0
mml-miR-142-3p	TGTAGTGTTTCCTACTTTATGGA	1	mml-miR-142-3p	10101	14346	11170	8118	4511	23479	6378	11450	9036	10968	10684	5651	12118	5857	8373	15268	19603	22992	10727	9566	16009	6814	10404	6404	14948	11218	9019	11789	23291	15311
mml-miR-142-5p	CATAAAGTAGAAAGCACTACT	1	mml-miR-142-5p	5237	4675	5723	8914	2418	8208	3338	6655	2082	5569	5470	3331	5991	3981	12612	5618	3083	8965	11207	5689	6659	8346	6693	5431	4601	8181	4542	7742	6729	5177
mml-miR-143-3p	TGAGATGAAGCACTGTAGCTC	1	mml-miR-143-3p	6	1	1	1	1	3	4	1	10	4	3	4	7	2	1	3	2	4	8	2	1	2	3	1	9	2	4	1	2	1
mml-miR-143-5p	GTGCAGTGCTGCATCTCTGG	1	mml-miR-143-5p	0	0	0	0	0	0	0	0	0	0	0	0	0	0	0	0	0	0	0	0	0	0	0	0	0	0	0	0	0	0
mml-miR-144	TACAGTATAGATGATGTACT	1	mml-miR-144	86	72	74	217	74	172	115	91	112	75	102	104	76	14	98	38	39	106	142	50	61	69	66	78	43	80	53	51	68	37
mml-miR-145-3p	GGATTCCTGGAAATACTGTTCTT	1	mml-miR-145-3p	0	0	0	0	0	0	0	0	0	0	0	0	0	0	0	0	0	0	0	0	0	0	0	0	0	0	0	0	0	0
mml-miR-145-5p	GTCCAGTTTTCCCAGGAATCCCTT	1	mml-miR-145-5p	2	2	4	2	2	1	3	3	2	2	1	2	4	3	1	4	3	10	2	3	3	3	2	1	4	2	1	3	2	2
mml-miR-146a-3p	CCTGTGAAATTCAGTTCTTCAG	1	mml-miR-146a-3p	0	0	0	0	0	0	0	0	0	0	0	0	0	0	0	0	0	0	0	0	0	0	0	0	0	0	0	0	0	0
mml-miR-146a-5p	TGAGAACTGAATTCCATGGGTT	1	mml-miR-146a-5p	205	214	173	224	410	160	350	190	469	190	191	375	193	125	114	180	162	126	280	168	328	126	235	145	113	172	143	152	181	136
mml-miR-146b-3p	TGCCCTGTGGACTCAGTTCTGG	1	mml-miR-146b-3p	0	0	0	0	0	0	0	0	0	0	0	0	0	0	0	0	0	0	0	0	0	0	0	0	0	0	0	0	0	0
mml-miR-146b-5p	TGAGAACTGAATTCCATAGGCT	1	mml-miR-146b-5p	7	4	5	2	4	4	6	5	11	3	2	7	4	2	1	5	7	4	6	3	14	3	7	5	5	7	3	4	9	6
mml-miR-147a	GTGTGTGGAAATGCTTCTGCTA	1	mml-miR-147a	0	0	0	0	0	0	0	0	0	0	0	0	0	0	0	0	0	0	0	0	0	0	0	0	0	0	0	0	0	0
mml-miR-147b	GTGTGCGGAAGTGCTTCTGCT	1	mml-miR-147b	0	0	0	0	0	0	0	1	0	0	0	0	0	0	1	0	0	0	0	0	0	1	0	0	0	1	0	0	0	0
mml-miR-148a-3p	TCAGTGCACTACAGAACTTTGT	1	mml-miR-148a-3p	376	815	805	831	568	934	672	571	630	421	478	725	557	211	684	460	513	398	1456	661	1071	833	944	561	385	774	518	885	1257	595
mml-miR-148a-5p	AAAGTTCTGAGACACTCCGACT	1	mml-miR-148a-5p	6	10	11	3	2	8	4	10	7	4	5	4	3	5	6	7	11	9	8	4	5	4	12	8	15	16	12	8	9	9
mml-miR-148b-3p	TCAGTGCATCACAGAACTTTGT	1	mml-miR-148b-3p	340	468	451	461	470	610	499	444	537	453	370	855	634	285	425	669	554	454	892	627	1250	300	786	541	447	736	522	670	585	737
mml-miR-148b-5p	GAAGTTCTGTTATACACTCAGGCT	1	mml-miR-148b-5p	13	14	9	14	18	13	15	7	19	9	5	16	12	9	9	15	17	13	10	19	11	11	15	18	14	12	11	16	17	12
mml-miR-149-3p	GAGGGAGGGACGGGGGCTGTGC	1	mml-miR-149-3p	0	0	0	0	0	0	0	0	0	0	0	0	0	0	0	0	0	0	0	0	0	0	0	0	0	0	0	0	0	0
mml-miR-149-5p	TCTGGCTCCGTGTCTTCACTCCC	1	mml-miR-149-5p	3	1	1	3	5	1	0	3	1	3	2	1	1	0	0	1	0	1	1	1	1	1	1	1	1	1	21	7	6	1
mml-miR-150-3p	CTGGTACAGGCCTGGGGGACA	1	mml-miR-150-3p	3	2	2	2	2	1	4	4	2	3	3	2	3	2	3	2	2	1	5	1	7	3	3	2	2	2	4	2	1	2
mml-miR-150-5p	TCTCCCAACCCTTGTACCAGTG	1	mml-miR-150-5p	15407	22766	24065	14887	14488	17453	18889	26253	14933	29895	25901	17629	19491	21003	16238	17567	15804	16804	23956	14899	37934	13688	20220	13504	17951	19612	20457	15663	17890	18290
mml-miR-151-3p	CTAGACTGAAGCTCCTTGAGG	1	mml-miR-151-3p	595	1209	1307	602	533	1228	612	1646	623	1522	1434	683	1244	2162	1027	1380	1516	1367	907	1266	1386	850	806	653	783	735	971	1419	1819	1090
mml-miR-151-5p	TCGAGGAGCTCACAGTCTAGT	1	mml-miR-151-5p	43	84	85	53	57	94	62	118	55	96	79	61	79	89	92	83	82	79	79	87	94	64	74	56	55	64	66	88	91	63
mml-miR-152-3p	TCAGTGCATGACAGAACTTGG	1	mml-miR-152-3p	11	5	6	13	18	7	5	5	11	4	4	9	2	5	5	3	2	5	11	16	12	12	11	12	3	5	6	8	7	5
mml-miR-152-5p	AGGTTCTGTGATACACTCCGACT	1	mml-miR-152-5p	0	0	0	0	0	0	0	0	0	0	0	0	0	0	0	0	0	0	0	0	0	0	0	0	0	0	0	0	0	0
mml-miR-153-1-5p	TCATTTTTGTGATCTGCAGCT	1	mml-miR-153-1-5p	0	0	0	0	0	0	0	0	0	0	0	0	0	0	0	0	0	0	0	0	0	0	0	0	0	0	0	0	0	0
mml-miR-153-2-5p	TCATTTTTGTGATGTTGCAGCT	1	mml-miR-153-2-5p	0	0	0	0	0	0	0	0	0	0	0	0	0	0	0	0	0	0	0	0	0	0	0	0	0	0	0	0	0	0
mml-miR-153-3p	TTGCATAGTCACAAAAGTGA	2	mml-miR-153-3p	0	0	0	0	0	0	0	0	0	0	0	0	0	0	0	0	0	0	0	0	0	0	0	0	0	0	0	0	0	0
mml-miR-154-3p	AATCATACACGGTTGACCTATT	1	mml-miR-154-3p	0	0	0	0	0	0	0	0	0	0	0	0	0	0	0	0	0	0	0	0	0	0	0	0	0	0	0	0	0	0
mml-miR-154-5p	TAGGTTATCCGTGTTGCCTTCG	1	mml-miR-154-5p	35	72	73	22	15	74	25	36	23	21	17	28	55	28	18	50	64	33	38	42	53	37	58	28	27	20	35	39	50	29
mml-miR-155	TTAATGCTAATCGTGATAGGGGT	1	mml-miR-155	298	228	212	275	375	155	324	194	409	219	158	367	156	128	116	217	108	90	255	229	255	205	393	285	90	105	274	296	387	95
mml-miR-181a-3p	ACCATCGACCGTTGATTGTACC	1	mml-miR-181a-3p	9	15	17	8	5	16	9	21	8	10	10	7	11	6	16	18	13	16	23	8	21	7	23	6	15	21	11	12	11	17
mml-miR-181a-5p	AACATTCAACGCTGTCGGTGAGT	2	mml-miR-181a-5p	113	81	70	109	116	51	173	126	187	94	92	178	61	54	212	81	71	86	237	50	101	82	151	148	105	178	163	57	37	110
mml-miR-181b-1-3p	ACTGAACAATGAATGCAAC	1	mml-miR-181b-1-3p	0	0	0	0	0	0	0	0	0	0	0	0	0	0	0	0	0	0	0	0	0	0	0	0	0	0	0	0	0	0
mml-miR-181b-2-3p	ACTGATCGATGAATGCAAA	1	mml-miR-181b-2-3p	0	0	0	0	0	0	0	0	0	0	0	0	0	0	0	0	0	0	0	0	0	0	0	0	0	0	0	0	0	0
mml-miR-181b-5p	AACATTCATTGCTGTCGGTGGGTT	2	mml-miR-181b-5p	52	30	27	35	49	18	75	51	82	29	33	64	27	24	78	42	31	42	61	34	37	43	67	82	40	57	49	21	17	33
mml-miR-181c-3p	CCATCGACCGTTGAGTGGACC	1	mml-miR-181c-3p	1	3	3	1	0	5	3	3	3	1	2	3	3	0	3	3	3	3	4	2	4	1	5	1	2	3	2	2	2	3
mml-miR-181c-5p	AACATTCAACCTGTCGGTGAGT	1	mml-miR-181c-5p	0	0	0	0	0	0	0	0	0	0	0	0	0	0	0	0	0	0	0	0	0	0	0	0	0	0	0	0	0	0
mml-miR-181d	AACATTCATTGTTGTCGGTGGGT	1	mml-miR-181d	1	1	0	0	1	0	2	1	3	0	1	3	0	0	1	0	0	0	2	0	0	0	2	1	0	0	0	0	0	0
mml-miR-182	TTTGGCAATGGTAGAACTCACA	1	mml-miR-182	19	21	25	14	14	24	39	34	47	31	29	48	21	39	22	24	23	24	37	36	37	34	27	30	10	18	26	37	38	21
mml-miR-183-3p	GTGAATTACCGAAGGGCCATAAA	1	mml-miR-183-3p	0	0	0	0	0	0	0	0	0	0	0	0	0	0	0	0	0	0	0	0	0	0	0	0	0	0	0	0	0	0
mml-miR-183-5p	TATGGCACTGGTAGAATTCACTG	1	mml-miR-183-5p	4	5	3	3	4	3	17	6	19	4	5	16	4	3	2	4	2	2	9	7	3	8	6	6	2	1	7	5	4	2
mml-miR-184	TGGACGGAGAACTGATAAGGGT	1	mml-miR-184	0	0	0	0	0	0	0	1	0	1	1	1	2	0	0	1	0	0	0	0	0	0	1	1	1	0	2	0	0	1
mml-miR-185-3p	AGGGGCTGGCTTTCCTCTGGT	1	mml-miR-185-3p	12	10	7	9	10	10	18	13	16	17	19	18	12	10	12	14	14	10	15	7	13	9	12	12	16	15	28	11	11	19
mml-miR-185-5p	TGGAGAGAAAGGCAGTTCCTGA	1	mml-miR-185-5p	2280	2014	1978	2389	2950	1731	3549	3333	3550	2807	2465	3105	3059	1727	2762	3375	3003	2088	3429	2358	3442	2354	3421	2552	2548	3396	3121	3564	3504	3218
mml-miR-186-3p	CCCAAAGGTGAATTTCTTGGG	1	mml-miR-186-3p	1	1	0	1	0	1	0	1	0	1	0	0	0	0	1	0	1	1	1	0	0	0	0	0	0	0	0	1	1	0
mml-miR-186-5p	CAAAGAATTCTCCTTTTGGGCT	1	mml-miR-186-5p	2158	2990	2991	1813	1278	3294	1352	3172	1598	2124	1811	1207	2895	3087	2860	3867	4397	3966	2415	2718	3308	1900	2411	1722	3389	3555	2276	3301	3779	3870
mml-miR-187-3p	TCGTGTCTTGTGTTGCAGCCGG	1	mml-miR-187-3p	672	1086	1135	837	781	832	529	724	356	509	493	716	988	222	488	680	537	229	1072	763	968	744	1153	824	378	616	661	604	887	501
mml-miR-187-5p	GGCTACAACACAGGACCCGGG	1	mml-miR-187-5p	33	87	107	50	39	87	8	40	7	51	53	10	52	17	15	50	44	11	66	35	73	33	50	31	37	50	20	21	21	51
mml-miR-188-3p	TCCCACATGCAGGGTTTGCA	1	mml-miR-188-3p	0	0	0	0	0	1	0	0	0	0	0	0	1	0	0	0	1	1	0	0	0	0	0	0	0	0	0	0	0	0
mml-miR-188-5p	CATCCCTTGCATGGTGGAGGGT	1	mml-miR-188-5p	0	1	2	1	0	1	1	3	1	1	2	0	3	1	3	4	4	3	2	1	2	1	2	1	1	4	1	1	2	2
mml-miR-190a-3p	CTATATATCAAACATATTCCT	1	mml-miR-190a-3p	0	0	0	0	0	0	0	0	0	0	0	0	0	0	0	0	0	0	0	0	1	0	1	0	0	0	0	0	1	0
mml-miR-190a-5p	TGATATGTTTGATATATTAGGT	1	mml-miR-190a-5p	77	60	44	114	129	68	11	5	20	3	4	13	7	17	75	7	3	41	215	8	138	15	360	11	16	19	31	61	50	14
mml-miR-190b	TGATATGTTTGATATTGGGTT	1	mml-miR-190b	46	25	16	65	92	16	23	25	24	17	21	24	27	9	19	26	8	12	17	32	11	44	36	32	7	7	13	28	17	8
mml-miR-191-3p	GCTGCGCTTGGATTTCGTCCCC	1	mml-miR-191-3p	43	99	110	42	40	101	64	121	46	96	108	65	103	65	88	85	81	55	99	45	94	76	83	37	63	66	71	69	73	71
mml-miR-191-5p	CAACGGAATCCCAAAAGCAGCTG	1	mml-miR-191-5p	60085	78785	103089	88080	62841	80780	58985	88697	50827	109183	90807	72127	66859	132865	81950	84412	82197	72208	92406	93346	122060	57561	66880	55815	68441	92144	72034	125739	99493	81080
mml-miR-192-3p	TGCCAATTCCATAGGTCACAG	1	mml-miR-192-3p	1	4	2	1	1	1	0	2	1	2	1	1	3	2	2	4	4	2	2	2	4	1	2	1	2	2	2	4	3	2
mml-miR-192-5p	CTGACCTATGAATTGACAGCC	1	mml-miR-192-5p	311	378	415	322	159	543	152	477	215	407	405	180	648	463	452	753	781	679	515	405	782	241	435	217	376	583	393	842	889	507
mml-miR-193a-3p	AACTGGCCTACAAAGTCCCAGT	1	mml-miR-193a-3p	0	0	0	0	0	0	0	0	0	0	0	0	0	0	0	0	0	0	0	0	0	0	0	0	0	0	0	0	0	0
mml-miR-193a-5p	TGGGTCTTTGCGGGCGAGATGA	1	mml-miR-193a-5p	0	0	0	0	0	0	0	0	1	0	0	0	0	0	0	0	0	0	1	0	0	1	0	0	0	0	0	0	0	0
mml-miR-193b-3p	AACTGGCCCTCAAAGTCCCGCT	1	mml-miR-193b-3p	0	0	0	0	0	0	0	0	1	0	0	0	0	0	0	1	1	0	0	0	0	0	0	0	1	1	0	0	0	0
mml-miR-193b-5p	CGGGGTTTTGAGGGCGAGATGA	1	mml-miR-193b-5p	0	0	0	0	0	0	0	0	0	0	0	0	0	0	0	0	0	0	0	0	0	0	0	0	0	0	0	0	0	0
mml-miR-194-3p	CAGTGGGGCTGCTGTTATCTG	1	mml-miR-194-3p	1	0	1	1	0	1	1	1	1	1	1	1	3	2	1	1	1	1	2	1	2	1	1	0	1	1	1	1	0	1
mml-miR-194-5p	TGTAACAGCAACTCCATGTGGA	2	mml-miR-194-5p	213	255	242	221	266	303	243	250	293	192	157	229	327	261	157	358	409	270	236	242	394	175	281	166	178	196	279	397	536	224
mml-miR-195-3p	CCAATATTGGCTGTGCTGCTCCA	1	mml-miR-195-3p	0	0	0	0	0	0	0	0	0	0	0	0	0	0	0	0	0	0	0	0	0	0	0	0	0	0	0	0	0	0
mml-miR-195-5p	TAGCAGCACAGAAATATTGGC	1	mml-miR-195-5p	2	1	1	2	3	1	1	1	4	0	0	1	1	0	0	1	0	0	1	1	1	1	1	0	0	0	0	1	1	0
mml-miR-196a-3p	GGCAACAAGAAACTGCCTGAG	1	mml-miR-196a-3p	0	0	0	0	0	0	0	0	0	0	0	0	0	0	0	0	0	0	0	0	0	0	0	0	0	0	0	0	0	0
mml-miR-196a-5p	TAGGTAGTTTCATGTTGTTGG	2	mml-miR-196a-5p	157	376	290	157	276	275	313	238	348	281	229	320	113	202	154	106	35	144	171	278	143	247	333	279	47	26	112	139	129	53
mml-miR-196b-3p	CGACAGCACGACACTGCCTTCA	1	mml-miR-196b-3p	0	0	0	0	0	0	0	0	0	0	0	0	0	0	0	0	0	0	0	0	0	0	0	0	0	0	0	0	0	0
mml-miR-196b-5p	TAGGTAGTTTCCTGTTGTTGGG	1	mml-miR-196b-5p	15	12	9	14	20	12	31	8	31	7	6	29	9	4	5	8	2	4	8	10	8	19	19	13	3	2	10	10	13	3
mml-miR-197-3p	TTCACCACCTTCTCCACCCAGC	1	mml-miR-197-3p	2292	2226	2774	1828	1066	2532	1964	2760	1622	3532	4113	1587	3064	3798	5756	3119	3356	4206	2813	2322	1977	2502	2583	3032	4628	3734	4584	2546	2305	3635
mml-miR-197-5p	CGGGTAGAGAGGGCAGTGGGAG	1	mml-miR-197-5p	0	0	0	0	0	0	0	0	0	0	0	0	0	0	0	0	0	0	0	0	0	0	0	0	0	0	0	0	0	0
mml-miR-198	GGTCCAGAGGGGAAATAGG	1	mml-miR-198	0	0	0	0	0	0	0	0	0	0	0	0	0	0	0	0	0	0	0	0	0	0	0	0	0	0	0	0	0	0
mml-miR-199a	CCCAGTGTTCAGACTACCTGTTC	1	mml-miR-199a,mml-miR-199a-5p	7	9	10	5	4	12	4	12	4	7	11	3	17	9	11	12	16	21	13	17	25	8	17	11	8	9	18	37	30	6
mml-miR-199a-3p	ACAGTAGTCTGCACATTGGTTA	1	mml-miR-199a-3p	42	24	17	19	58	21	39	24	100	31	40	53	19	7	7	14	16	19	80	27	16	38	32	26	9	5	34	24	25	4
mml-miR-199a-5p	CCCAGTGTTCAGACTACCTGTTC	1	mml-miR-199a,mml-miR-199a-5p	6	8	7	7	3	10	4	10	3	8	7	3	14	7	10	11	11	19	12	13	18	8	16	8	6	8	16	32	27	4
mml-miR-200a-3p	TAACACTGTCTGGTAACGATGT	1	mml-miR-200a-3p	0	0	0	0	0	0	2	0	2	0	1	1	0	0	1	0	0	0	0	1	0	2	0	3	1	0	1	0	0	0
mml-miR-200a-5p	CATCTTACCGGACAGTGCTGGA	1	mml-miR-200a-5p	0	0	0	0	0	0	0	0	0	0	0	0	0	0	0	0	0	0	0	0	0	0	0	0	0	0	0	0	0	0
mml-miR-200c-3p	AATACTGCCGGGTAATGATGGA	1	mml-miR-200c-3p	8	14	9	9	9	7	21	6	21	7	6	16	6	5	4	4	3	4	7	33	7	36	12	38	3	3	9	9	9	3
mml-miR-200c-5p	CGTCTTACCCAGCAGTGTTTGG	1	mml-miR-200c-5p	0	0	0	0	0	0	0	0	0	0	0	0	0	0	0	0	0	0	0	0	0	0	0	0	0	0	0	0	0	0
mml-miR-203	GTGAAATGTTTAGGACCACTAG	1	mml-miR-203	0	0	0	0	0	0	0	0	0	0	1	0	0	0	0	0	0	0	0	0	0	0	0	0	0	0	0	0	0	0
mml-miR-204-3p	GGCTGGGAAGGCAAAGGGACGT	1	mml-miR-204-3p	0	0	0	0	0	0	0	0	0	0	0	0	0	0	0	0	0	0	0	0	0	0	0	0	0	0	0	0	0	0
mml-miR-204-5p	TTCCCTTTGTCATCCTATGCCT	1	mml-miR-204-5p	11	39	59	9	7	38	4	19	5	9	9	3	5	40	43	10	6	45	6	6	6	11	7	5	13	17	12	19	16	13
mml-miR-205	TCCTTCATTCCACCGGAGTCTG	1	mml-miR-205	0	2	1	0	0	2	1	2	3	1	1	1	3	1	2	1	1	2	4	1	5	1	2	2	1	2	4	2	1	1
mml-miR-206	TGGAATGTAAGGAAGTGTGTGG	1	mml-miR-206	2	0	0	2	3	1	3	0	2	2	0	1	2	0	0	0	0	2	2	1	0	2	3	0	0	0	3	3	1	0
mml-miR-208a-3p	ATAAGACGAGCAAAAAGCTTGT	1	mml-miR-208a-3p	0	0	0	0	0	0	0	0	0	0	0	0	0	0	0	0	0	0	0	0	0	0	0	0	0	0	0	0	0	0
mml-miR-208a-5p	GAGCTTTTGGCCCGGGTTATAC	1	mml-miR-208a-5p	0	0	0	0	0	0	0	0	0	0	0	0	0	0	0	0	0	0	0	0	0	0	0	0	0	0	0	0	0	0
mml-miR-208b-3p	ATAAGACGAACAAAAGGTTTGT	1	mml-miR-208b-3p	0	0	0	0	0	0	0	0	0	0	0	0	0	0	0	0	0	0	0	0	0	0	0	0	0	0	0	0	0	0
mml-miR-208b-5p	AAGCTTTTTGCTCGAATTATGT	1	mml-miR-208b-5p	0	0	0	0	0	0	0	0	0	0	0	0	0	0	0	0	0	0	0	0	0	0	0	0	0	0	0	0	0	0
mml-miR-210-3p	CTGTGCGTGTGACAGCGGCTGA	1	mml-miR-210-3p	462	676	587	630	853	520	820	573	678	406	454	735	628	242	637	431	322	334	477	975	439	1052	534	978	170	300	258	351	285	183
mml-miR-210-5p	AGCCCCTGCCCACCGCACACTG	1	mml-miR-210-5p	2	1	1	1	0	2	2	1	1	2	3	1	2	2	4	3	3	3	2	1	1	2	1	2	1	2	1	1	1	0
mml-miR-211	TTCCCTTTGTCATCCTTTGCCT	1	mml-miR-211	5	3	2	4	3	3	2	8	1	3	3	0	7	7	8	7	5	10	4	3	2	8	3	2	4	6	7	13	12	4
mml-miR-212-3p	TAACAGTCTCCAGTCAGGGCC	1	mml-miR-212-3p	0	0	0	0	0	0	0	0	0	0	0	0	0	0	0	0	0	0	0	0	0	0	0	0	0	0	0	0	0	0
mml-miR-212-5p	ACCTTGGCTCTAGACTGCTTACT	1	mml-miR-212-5p	0	0	0	0	0	0	0	0	0	0	0	0	0	0	0	0	0	0	0	0	0	0	0	0	0	0	0	0	0	0
mml-miR-214-3p	ACAGCAGGCACAGACAGGCAG	1	mml-miR-214-3p	0	0	0	0	0	0	0	0	0	0	0	0	0	0	0	0	1	0	0	0	0	0	0	0	0	0	0	0	0	0
mml-miR-214-5p	TGCCTGTCTACACTTGCTGTGC	1	mml-miR-214-5p	0	0	0	0	0	0	0	0	0	0	0	0	0	0	0	0	0	0	0	0	0	0	0	0	0	0	0	0	0	0
mml-miR-215-3p	TCTGTCATTTCTTTAGGCCAATA	1	mml-miR-215-3p	0	0	0	0	0	0	0	0	0	0	0	0	0	0	0	0	0	0	0	0	0	0	0	0	0	0	0	0	0	0
mml-miR-215-5p	ATGACCTATGAATTGACAGAC	1	mml-miR-215-5p	1	0	0	0	0	0	0	0	1	0	1	0	1	1	0	1	1	1	1	1	1	0	0	0	0	1	1	1	1	0
mml-miR-216a-3p	ACAGTGGTCTCTGGGATTACG	1	mml-miR-216a-3p	0	0	0	0	0	0	0	0	0	0	0	0	0	0	0	0	0	0	0	0	0	0	0	0	0	0	0	0	0	0
mml-miR-216a-5p	TAATCTCAGCTGGCAACTGTGA	1	mml-miR-216a-5p	0	0	0	0	0	0	0	0	0	0	0	0	0	0	0	0	0	0	0	0	0	0	0	0	0	0	0	0	0	0
mml-miR-216b	AAATCTCTGCAGGCAAATGTGA	1	mml-miR-216b	0	0	0	0	0	0	0	0	0	0	0	0	0	0	0	0	0	0	0	0	0	0	0	0	0	0	0	0	0	0
mml-miR-217a	TTCTGCATCAGGAACTGATTGGA	1	mml-miR-217a	0	0	0	0	0	0	0	0	0	0	0	0	0	0	0	0	0	0	0	0	0	0	0	0	0	0	0	0	0	0
mml-miR-217b	TACTGCATCAGGAACTGATTGGA	1	mml-miR-217b	0	0	0	0	0	0	0	0	0	0	0	0	0	0	0	0	0	0	0	0	0	0	0	0	0	0	0	0	0	0
mml-miR-218-1-3p	ATGGTTCCGTCAAGCACCATG	1	mml-miR-218-1-3p	0	0	0	0	0	0	0	0	0	0	0	0	0	0	0	0	0	0	0	0	0	0	0	0	0	0	0	0	0	0
mml-miR-218-2-3p	ATGGTTCTGTCAAGCACCGCG	1	mml-miR-218-2-3p	0	0	0	0	0	0	0	0	0	0	0	0	0	0	0	0	0	0	0	0	0	0	0	0	0	0	0	0	0	0
mml-miR-218-5p	TTGTGCTTGATCTAACCATGT	2	mml-miR-218-5p	0	0	0	0	0	0	0	0	0	0	0	0	0	0	0	0	0	0	0	0	0	0	0	0	0	0	0	0	0	0
mml-miR-219	TGATTGTCCAAACGCAATTCT	1	mml-miR-219,mml-miR-219-5p	0	0	0	0	0	0	0	0	0	0	0	0	0	0	0	0	0	0	0	0	0	0	0	0	0	0	0	0	0	0
mml-miR-219-3p	AGAATTGTGGCTGGACATCTGT	1	mml-miR-219-3p	0	0	0	0	0	0	0	0	0	0	0	0	0	0	0	0	0	0	0	0	0	0	0	0	0	0	0	0	0	0
mml-miR-219-5p	TGATTGTCCAAACGCAATTCT	1	mml-miR-219,mml-miR-219-5p	0	0	0	0	0	0	0	0	0	0	0	0	0	0	0	0	0	0	0	0	0	0	0	0	0	0	0	0	0	0
mml-miR-221-3p	AGCTACATTGTCTGCTGGGTTTC	1	mml-miR-221-3p	3670	2355	1890	3248	4685	1231	5663	3167	5521	1418	1401	3925	2175	1217	5024	2659	1532	1951	3778	1722	1523	4733	4059	4141	1554	2524	2498	1519	1089	1315
mml-miR-221-5p	ACCTGGCATACAATGTAGATTTCTGT	1	mml-miR-221-5p	7	7	8	6	5	6	11	7	14	6	4	8	4	5	7	6	8	5	9	5	6	6	10	6	5	7	6	6	8	5
mml-miR-222-3p	AGCTACATCTGGCTACTGGGT	1	mml-miR-222-3p	300	169	144	249	321	118	294	264	306	118	120	186	162	227	404	189	200	244	183	188	151	427	189	267	207	296	205	128	135	170
mml-miR-222-5p	CAGTAGCCAGTGTAGATCC	1	mml-miR-222-5p	0	0	0	0	0	0	0	0	0	0	0	0	0	0	0	0	0	0	0	0	0	0	0	0	0	0	0	0	0	0
mml-miR-223	TGTCAGTTTGTCAAATACCCC	1	mml-miR-223	21314	46422	37082	30407	27583	46583	19563	37040	20516	32401	27006	24133	34782	22798	24980	35160	29134	21200	36202	33620	45335	27766	39680	25165	27058	29033	33577	49530	35528	43145
mml-miR-224-3p	ATGGTGCCCTAGTGACTACAA	1	mml-miR-224-3p	0	0	0	0	0	0	0	0	0	0	0	0	0	0	0	0	0	0	0	0	0	0	0	0	0	0	0	0	0	0
mml-miR-224-5p	CAAGTCACTAGTGGTTCCGTTTA	1	mml-miR-224-5p	4	0	0	0	0	0	0	2	8	2	4	2	0	0	0	0	1	1	7	1	0	0	0	0	0	0	1	0	0	0
mml-miR-296-3p	GAGGGTTGGGTGGAGGCTCTCC	1	mml-miR-296-3p	6	18	16	6	3	18	11	14	11	22	22	13	17	9	11	16	10	9	20	8	24	9	15	7	15	14	18	13	11	16
mml-miR-296-5p	AGGGCCCCCCCTCAATCCTGT	1	mml-miR-296-5p	957	1183	1261	846	506	998	915	1317	583	1347	1398	679	950	1414	1811	1040	1012	1383	1120	679	1004	1233	939	683	1182	1282	866	796	854	900
mml-miR-297	ATGTATGTGTGCATGTGCAT	1	mml-miR-297	0	0	0	0	0	0	0	0	0	0	0	0	0	0	0	0	0	0	0	0	0	0	0	0	0	0	0	0	0	0
mml-miR-298	AGCAGAAGCCGGGTGGTTCTCCCA	1	mml-miR-298	0	0	0	0	0	0	0	0	0	0	0	0	0	0	0	0	0	0	0	0	0	0	0	0	0	0	0	0	0	0
mml-miR-299-3p	TATGTGGGACGGTAAACCGCTT	1	mml-miR-299-3p	2	8	7	4	4	7	5	2	4	1	2	8	3	1	1	2	1	1	2	2	3	5	4	1	1	1	1	2	2	1
mml-miR-299-5p	TGGTTTACCGTCCCACATACAT	1	mml-miR-299-5p	83	179	190	57	33	162	50	93	55	51	42	56	78	65	69	96	92	78	110	68	116	88	142	56	55	51	71	72	80	45
mml-miR-301a-3p	CAGTGCAATAGTATTGTCAAAGC	1	mml-miR-301a-3p	9	7	6	16	21	9	24	7	22	8	7	18	14	1	5	8	3	4	12	7	7	11	14	11	2	2	5	12	10	2
mml-miR-301a-5p	TCTGACTTTATTGCACTACT	1	mml-miR-301a-5p	0	1	1	0	0	2	0	1	0	0	1	0	1	0	1	1	2	0	1	0	1	1	1	0	1	1	1	1	1	1
mml-miR-301b	CAGTGCAATGATATTGTCAAAGC	1	mml-miR-301b	0	0	0	0	0	0	0	0	0	0	0	0	0	0	0	0	0	0	0	0	0	0	0	0	0	0	0	0	0	0
mml-miR-302a-3p	TAAGTGCTTCCATGTTTTGGTGA	1	mml-miR-302a-3p	0	0	0	0	0	0	0	0	0	0	0	0	0	0	0	0	0	0	0	0	0	0	0	0	0	0	0	0	0	0
mml-miR-302a-5p	TAAACGTGGATGTACTTGCTTT	1	mml-miR-302a-5p	0	0	0	0	0	0	0	0	0	0	0	0	0	0	0	0	0	0	0	0	0	0	0	0	0	0	0	0	0	0
mml-miR-302b	TAAGTGCTTCCATGTTTTAGTAG	1	mml-miR-302b	0	0	0	0	0	0	0	0	0	0	0	0	0	0	0	0	0	0	0	0	0	0	0	0	0	0	0	0	0	0
mml-miR-302c	TAAGTGCTTCCATGTTTCAGTGG	1	mml-miR-302c	0	0	0	0	0	0	0	0	0	0	0	0	0	0	0	0	0	0	0	0	0	0	0	0	0	0	0	0	0	0
mml-miR-302d	TAAGTGCTTCCATGTTTGAGTGT	1	mml-miR-302d	0	0	0	0	0	0	0	0	0	0	0	0	0	0	0	0	0	0	0	0	0	0	0	0	0	0	0	0	0	0
mml-miR-320a	AAAAGCTGGGTTGAGAGGGCGA	1	mml-miR-320a	2941	1489	1614	2213	1685	1204	2713	2106	2987	2932	2560	2396	1694	1099	3112	2245	2733	1894	3581	1736	2108	1606	2669	4085	3956	4423	3226	1643	1540	4061
mml-miR-320b	AAAAGCTGGGTTGAGAGGGCAA	1	mml-miR-320b	40	18	19	29	23	16	39	27	47	33	31	35	26	15	45	34	38	29	53	22	27	22	44	61	60	63	52	23	20	58
mml-miR-320c	AAAAGCTGGGTTGACAGGGTAA	1	mml-miR-320c	0	0	0	0	0	0	0	0	0	0	0	0	0	0	0	0	0	0	0	0	0	0	0	0	0	0	0	0	0	0
mml-miR-323a-3p	CACATTACACGGTCGACCTCT	1	mml-miR-323a-3p	27	55	61	27	18	60	19	35	20	26	23	35	28	27	17	35	31	17	45	36	44	36	56	30	19	18	30	29	36	21
mml-miR-323a-5p	AGGTGGTCCGTGGCGCGTTCGC	1	mml-miR-323a-5p	0	0	0	0	0	0	0	0	0	0	0	0	0	0	0	0	0	0	0	0	0	0	0	0	0	0	0	0	0	0
mml-miR-323b-3p	CCCAATACACGGTCGACCTCT	1	mml-miR-323b-3p	66	129	155	72	41	110	38	98	30	50	47	52	61	64	66	73	63	40	104	74	90	132	110	59	33	48	54	81	78	33
mml-miR-323b-5p	AGGTTGTCCGTGGTGAGTTCGCA	1	mml-miR-323b-5p,mml-miR-453	0	0	0	0	0	0	0	0	0	0	0	0	0	0	0	0	0	0	0	0	0	0	0	0	0	0	0	0	0	0
mml-miR-324-3p	ACTGCCCCAGGTGCTGCTGG	1	mml-miR-324-3p	119	124	125	98	58	127	113	182	81	204	237	102	185	195	266	173	188	202	181	134	181	190	136	131	181	223	184	156	126	179
mml-miR-324-5p	CGCATCCCCTAGGGCATTGGTGT	1	mml-miR-324-5p	138	152	142	151	103	155	113	198	80	158	134	104	199	296	241	191	207	259	176	232	231	253	129	128	199	246	162	208	250	234
mml-miR-325	CCTAGTAGGTGTCCAGTAAGTGT	1	mml-miR-325	0	0	0	0	0	0	0	0	0	0	0	0	0	0	0	0	0	0	0	0	0	0	0	0	0	0	0	0	0	0
mml-miR-329-1-5p	GAGGTTTTCTGGGTTTCTGTTTC	1	mml-miR-329-1-5p	0	0	0	0	0	0	0	0	0	0	0	0	0	0	0	0	0	0	0	0	0	0	0	0	0	0	0	0	0	0
mml-miR-329-2-5p	GAGGTTTTCTGGGTCTCTGTTT	1	mml-miR-329-2-5p	0	0	0	0	0	0	0	0	0	0	0	0	0	0	0	0	0	0	0	0	0	0	0	0	0	0	0	0	0	0
mml-miR-329-3p	AACACACCTGGTTAACCTCTTT	2	mml-miR-329-3p	7	17	16	6	3	11	2	11	5	4	4	2	7	4	4	10	8	2	9	7	8	9	13	6	6	5	4	4	5	4
mml-miR-330-3p	GCAAAGCACACGGCCTGCAGAGA	1	mml-miR-330-3p	2	1	2	1	1	1	1	3	1	3	2	2	2	1	1	3	3	2	3	2	4	2	2	1	2	4	2	3	2	2
mml-miR-330-5p	TCTCTGGGCCTGTGTCTTAGGC	1	mml-miR-330-5p	5	7	6	5	3	6	4	10	3	6	5	3	10	15	9	10	9	13	6	7	7	12	6	8	11	10	8	7	10	11
mml-miR-331-3p	GCCCCTGGGCCTATCCTAGAA	1	mml-miR-331-3p	2019	2396	2383	1820	1423	2557	1332	3007	1188	3406	3509	1447	3542	4032	3073	3064	2869	3805	2005	1929	2713	1917	1811	1336	3012	3085	2985	3410	3133	3130
mml-miR-331-5p	CTAGGTATGGTCCCAGGGATCC	1	mml-miR-331-5p	40	27	24	51	51	30	46	34	49	25	31	50	37	40	57	36	44	30	34	27	30	53	30	34	33	35	42	25	33	35
mml-miR-335-3p	TTTTTCATTATTGCTCCTGACC	1	mml-miR-335-3p	18	15	14	11	4	15	7	19	12	7	8	4	14	11	13	24	16	29	17	11	11	15	21	12	48	57	16	19	19	43
mml-miR-335-5p	TCAAGAGCAATAACGAAAAATGT	1	mml-miR-335-5p	10	11	10	11	6	16	8	9	15	15	11	10	14	4	8	17	13	11	33	15	38	3	26	7	22	30	6	24	19	29
mml-miR-337-3p	CTCCTATATGATGCCTTTCTTC	1	mml-miR-337-3p	5	14	16	5	2	18	4	7	3	3	4	3	9	5	4	9	5	5	7	7	7	10	12	4	3	3	5	8	8	3
mml-miR-337-5p	GAACGGCTTCATACAGGAGTT	1	mml-miR-337-5p	3	9	7	5	5	9	9	3	5	1	1	7	6	0	2	2	2	1	5	4	4	4	9	4	1	2	2	2	2	1
mml-miR-338-3p	TCCAGCATCAGTGATTTTGTTG	1	mml-miR-338-3p	11	24	12	14	29	29	22	13	34	15	11	40	18	5	6	16	18	7	13	19	25	6	24	14	14	11	26	19	20	24
mml-miR-338-5p	AACAATATCCTGGTGCTGAGTG	1	mml-miR-338-5p	0	0	0	0	0	0	0	0	0	0	0	0	0	0	0	0	0	0	0	0	0	0	0	0	0	0	0	0	0	0
mml-miR-339-3p	TGAGCGCCTCGACGACAGAGCCG	1	mml-miR-339-3p	822	715	675	652	374	663	384	689	333	407	408	326	595	653	1191	712	939	1019	798	606	792	577	610	467	820	1070	381	386	341	743
mml-miR-339-5p	TCCCTGTCCTCCAGGAGCTCACG	1	mml-miR-339-5p	18395	17587	20387	15975	10058	18223	8813	18772	7608	14026	17310	9676	22551	20704	31573	20864	18095	32844	19655	16626	19872	14767	16453	12559	19038	22031	10332	13920	11664	19942
mml-miR-340-3p	TCCGTCTCAGTTACTTTATAGCC	1	mml-miR-340-3p	83	111	125	94	67	152	43	130	56	110	111	44	113	123	81	108	70	145	96	118	127	87	98	63	86	86	66	120	114	105
mml-miR-340-5p	TTATAAAGCAATGAGACTGATT	1	mml-miR-340-5p	113	149	113	258	133	151	131	143	167	106	139	174	147	25	138	120	81	89	453	84	245	91	224	119	54	148	76	93	101	79
mml-miR-342-3p	TCTCACACAGAAATCGCACCCGT	1	mml-miR-342-3p	600	886	1093	480	561	669	942	1291	941	1165	1219	1111	771	869	466	954	915	617	1247	610	2719	388	981	544	662	1234	622	539	826	735
mml-miR-342-5p	AGGGGTGCTATCTGTGATTGA	1	mml-miR-342-5p	2	1	3	2	2	1	4	5	5	5	5	7	4	1	2	2	3	3	8	3	11	1	5	4	4	6	4	3	5	3
mml-miR-345	GCTGACTCCTAGTCAAGGGCTC	1	mml-miR-345	0	0	0	0	0	0	0	0	0	0	0	0	0	0	0	0	0	0	0	0	0	0	0	0	0	0	0	0	0	0
mml-miR-346	TGTCTGCCCGCATGCCTGCCTCT	1	mml-miR-346	0	0	0	0	0	0	0	1	0	0	1	0	0	1	0	0	0	0	0	0	0	0	0	0	0	0	0	0	0	0
mml-miR-361-3p	TCCCCCAGGTGTGATTCTGATTT	1	mml-miR-361-3p	2217	2172	2628	2832	1547	2173	1914	4478	1341	3534	3578	1904	4301	4728	5259	3565	2670	4331	3604	3805	4033	4611	2700	2732	2107	2981	1983	3345	3071	2661
mml-miR-361-5p	TTATCAGAATCTCCAGGGGTAC	1	mml-miR-361-5p	1846	2639	2511	1397	1303	2095	2072	3264	2244	2513	2204	1834	2206	3210	1398	3327	3852	2421	2874	2448	3572	1904	2853	1898	2667	2422	2235	2164	3416	2810
mml-miR-362-3p	AACACACCTATTCAAGGATTCA	1	mml-miR-362-3p	1	1	0	0	0	0	0	0	0	0	0	0	1	0	0	1	1	1	1	0	1	0	1	0	1	1	0	0	0	1
mml-miR-362-5p	AATCCTTGGAACCTAGGTGTGAGT	1	mml-miR-362-5p	14	20	15	13	10	14	18	21	28	14	13	14	25	17	25	25	49	29	32	13	28	12	28	18	26	28	19	13	27	24
mml-miR-363-3p	AATTGCACGGTATCCATCTGTA	1	mml-miR-363-3p	30	25	17	20	16	26	12	18	19	17	13	11	22	7	5	39	35	13	28	13	24	9	31	14	10	10	29	19	30	10
mml-miR-363-5p	CGGGTGGATCACGATGCAATTTT	1	mml-miR-363-5p	0	0	0	0	0	0	0	0	0	0	0	0	0	0	0	0	0	0	0	0	0	0	0	0	0	0	0	0	0	0
mml-miR-365-1-5p	GAGGGACTTTTGGGGGCAGATGT	1	mml-miR-365-1-5p	0	0	0	0	0	0	0	0	0	0	0	0	0	0	0	0	0	0	0	0	0	0	0	0	0	0	0	0	0	0
mml-miR-365-2-5p	GAGGGACTTTCAGGGGCAGCTGT	1	mml-miR-365-2-5p	0	0	0	0	0	0	0	0	0	0	0	0	0	0	0	0	0	0	0	0	0	0	0	0	0	0	0	0	0	0
mml-miR-365-3p	TAATGCCCCTAAAAATCCTTAT	2	mml-miR-365-3p	10	13	10	6	6	7	7	12	7	9	5	7	12	6	5	21	12	8	12	13	19	12	11	10	11	21	5	8	8	12
mml-miR-367	AATTGCACTTTAGCAATGGTGA	1	mml-miR-367	0	0	0	0	0	0	0	0	0	0	0	0	0	0	0	0	0	0	0	0	0	0	0	0	0	0	0	0	0	0
mml-miR-369-3p	AATAATACATGGTTGATCTTT	1	mml-miR-369-3p	0	1	1	1	1	0	2	0	3	0	0	5	1	0	0	0	0	0	1	0	0	2	2	1	0	0	0	0	0	0
mml-miR-369-5p	AGATCGACCGTGTTATATTCGC	1	mml-miR-369-5p	15	27	21	11	10	22	14	8	16	5	5	16	11	3	4	13	7	7	14	14	17	16	30	14	6	6	9	11	13	7
mml-miR-370-3p	GCCTGCTGGGGTGGAACCTGGT	1	mml-miR-370-3p	28	44	38	38	43	36	41	18	27	23	22	68	23	10	17	12	14	8	39	22	43	45	35	27	9	11	20	13	19	11
mml-miR-370-5p	CAGGTCACGTCTCTGCAGTTAC	1	mml-miR-370-5p	0	0	0	0	0	0	0	0	0	0	0	0	0	0	0	0	0	0	0	0	0	0	0	0	0	0	0	0	0	0
mml-miR-371-3p	AAGTGCCGCCATGTTTTGAGTGT	2	mml-miR-371-3p	0	0	0	0	0	0	0	0	0	0	0	0	0	0	0	0	0	0	0	0	0	0	0	0	0	0	0	0	0	0
mml-miR-371-5p	ACTCAAACTGTGGGGGCACT	2	mml-miR-371-5p	3	4	4	2	1	3	0	1	0	0	0	0	0	0	1	0	0	0	2	2	2	3	1	2	1	1	0	0	0	1
mml-miR-372-3p	AAAGTGCTGCGACATTTGAGCGT	1	mml-miR-372-3p	7	7	6	6	8	4	0	1	1	0	0	0	1	0	1	0	1	1	3	4	3	8	5	8	2	4	0	0	0	2
mml-miR-372-5p	CCTCAAATGTGGAGCACTATTCT	1	mml-miR-372-5p	0	0	0	0	0	0	0	0	0	0	0	0	0	0	0	0	0	0	0	0	0	0	0	0	0	0	0	0	0	0
mml-miR-373	GAAGTGCTTCGATTTTGGGGTGT	1	mml-miR-373	4	4	4	7	9	3	0	1	0	0	0	0	0	1	1	0	0	0	3	5	2	7	4	5	3	4	0	0	0	4
mml-miR-374a-3p	CTTATCAGATTGTATTGTAATT	1	mml-miR-374a-3p	0	1	0	3	1	2	1	1	0	2	1	0	0	0	5	1	0	2	2	1	1	2	0	0	1	1	0	1	3	0
mml-miR-374a-5p	TTATAATACAACCTGATAAGTG	1	mml-miR-374a-5p	114	93	60	106	136	121	104	52	258	54	54	135	53	21	28	59	42	58	64	75	56	56	105	89	34	27	65	66	119	29
mml-miR-374b-3p	TTAGCAGGTTGTATTATCATT	1	mml-miR-374b-3p	0	1	0	1	0	0	0	0	0	0	0	1	0	0	0	0	0	0	0	0	0	0	0	0	0	0	0	0	1	0
mml-miR-374b-5p	ATATAATACAACCTGCTAAGTG	1	mml-miR-374b-5p	145	152	121	112	132	129	163	102	214	77	60	104	69	92	38	101	82	82	68	100	68	119	129	90	68	50	81	86	157	51
mml-miR-375	TTTGTTCGTTCGGCTCGCGTGA	1	mml-miR-375	3	1	1	0	2	0	4	1	5	5	1	1	0	0	1	0	1	0	3	0	2	1	2	2	1	2	1	0	0	0
mml-miR-376a-1-5p	GTAGATTCTCCTTCTATGAGTAC	1	mml-miR-376a-1-5p	0	2	1	0	0	2	0	0	0	0	0	0	0	0	0	1	1	1	0	1	1	1	1	0	0	0	0	1	1	0
mml-miR-376a-2-5p	GTAGATTTTCCTTCTATGGTT	1	mml-miR-376a-2-5p	0	1	1	0	0	1	0	0	0	0	0	0	0	0	0	1	1	0	0	0	1	0	0	0	0	0	0	1	1	0
mml-miR-376a-3p	ATCATAGAGGAAAATCCACGT	2	mml-miR-376a-3p	16	25	23	16	8	38	11	12	15	8	7	18	17	4	9	18	23	10	27	19	36	12	29	8	7	11	8	18	16	11
mml-miR-376b-3p	ATCATAGAGGAAAATCCATGTT	1	mml-miR-376b-3p	0	0	0	0	0	1	0	0	0	0	0	0	0	0	0	0	0	0	0	0	0	0	0	0	0	0	0	0	0	0
mml-miR-376b-5p	CGTGGATATTCCTTCTATGTTTA	1	mml-miR-376b-5p	2	3	3	1	0	5	1	1	0	0	0	0	2	0	0	2	2	1	1	1	2	1	3	0	0	1	0	1	1	0
mml-miR-376c-3p	AACATAGAGGAAATTCCACGT	1	mml-miR-376c-3p	7	11	10	7	3	16	7	5	9	3	1	6	6	1	6	8	13	3	13	6	12	5	19	6	6	6	4	7	5	4
mml-miR-376c-5p	GTGGATATTCCTTCTATGTTTA	1	mml-miR-376c-5p	1	4	3	0	0	5	0	2	0	1	1	0	3	0	0	2	1	1	1	3	3	1	3	1	1	0	0	4	2	1
mml-miR-377-3p	ATCACACAAAGGCAACTTTTGT	1	mml-miR-377-3p	2	3	2	2	0	6	1	2	3	1	0	2	2	0	1	2	4	2	3	1	3	1	8	2	1	2	2	1	2	1
mml-miR-377-5p	AGAGGTTGCCCTTGGTGAATTC	1	mml-miR-377-5p	0	0	1	0	0	0	0	0	1	0	0	1	0	0	0	0	0	0	0	0	0	0	1	0	0	0	0	0	0	0
mml-miR-378a	ACTGGACTTGGAGTCAGAAGG	1	mml-miR-378a	103	91	87	107	95	60	211	108	260	59	64	166	70	61	208	90	108	85	158	84	82	168	127	149	74	126	119	84	104	71
mml-miR-378d	ACTGGACTTGGAGTCAGAAGCA	1	mml-miR-378d	17	13	15	23	22	9	28	16	35	11	9	25	9	10	30	15	18	12	24	14	12	24	18	20	12	18	16	10	14	12
mml-miR-378j	ACTGGATTTGGAGCCAGAA	1	mml-miR-378j	0	0	0	0	0	0	0	0	0	0	0	0	0	0	0	0	0	0	0	0	0	0	0	0	0	0	0	0	0	0
mml-miR-379-3p	TATGTAACATGGTCCACTAAC	1	mml-miR-379-3p	0	1	1	0	0	1	0	0	0	0	0	0	0	0	0	0	0	0	0	0	0	0	1	0	0	0	0	0	0	0
mml-miR-379-5p	TGGTAGACTATGGAACGTAGG	1	mml-miR-379-5p	13	22	15	13	20	16	22	5	23	5	4	28	9	2	2	10	4	2	8	11	7	15	21	12	2	1	5	8	8	1
mml-miR-380-3p	TATGTAATATGGTCCACGTCTT	1	mml-miR-380-3p	0	0	0	0	0	0	0	0	0	0	0	0	0	0	0	0	0	0	0	0	0	0	0	0	0	0	0	0	0	0
mml-miR-380-5p	ATGGTTGACCATAGAACATGCG	1	mml-miR-380-5p	0	0	0	0	0	0	0	0	0	0	0	0	0	0	0	0	0	0	0	0	0	0	0	0	0	0	0	0	0	0
mml-miR-381-3p	TATACAAGGGCAAGCTCTCTGT	1	mml-miR-381-3p	28	72	63	18	14	67	25	29	24	12	12	25	34	14	15	30	60	26	33	26	36	29	39	15	13	15	20	23	46	17
mml-miR-381-5p	AGCGAGGTTGCCCTTTGTATATT	1	mml-miR-381-5p	0	0	0	0	0	0	0	0	0	0	0	0	0	0	0	0	0	0	0	0	0	0	0	0	0	0	0	0	0	0
mml-miR-382-3p	AATCATTCACGGACAACACTTTT	1	mml-miR-382-3p	2	3	4	1	1	5	1	2	1	1	1	1	2	0	1	2	2	1	3	1	3	1	5	1	1	2	1	2	2	1
mml-miR-382-5p	GAAGTTGTTCGTGGTGGATTCG	1	mml-miR-382-5p	56	69	62	64	89	54	88	29	79	25	18	139	40	11	26	31	18	11	69	49	48	63	94	63	8	12	31	37	28	13
mml-miR-383	AGATCAGAAGGTGATTGTGGCT	1	mml-miR-383	0	0	0	0	0	0	0	0	0	0	0	0	0	0	0	0	0	0	0	0	0	0	0	0	0	0	0	0	0	0
mml-miR-384	ATTCCTAGAAATTGTTCATA	1	mml-miR-384	0	0	0	0	0	0	0	0	0	0	0	0	0	0	0	0	0	0	0	0	0	0	0	0	0	0	0	0	0	0
mml-miR-409-3p	GAATGTTGCTCGGTGAACCCCT	1	mml-miR-409-3p	631	1336	1495	784	487	1263	567	806	408	552	477	850	792	705	552	793	705	424	1064	790	1271	1102	1108	540	327	422	493	779	893	391
mml-miR-409-5p	AGGTTACCCGAGCAACTTTGCAT	1	mml-miR-409-5p	8	22	21	9	5	18	8	13	9	4	4	10	9	5	7	13	16	5	18	7	17	12	23	7	7	8	7	7	8	5
mml-miR-410-3p	AATATAACACAGATGGCCTGT	1	mml-miR-410-3p	0	0	0	0	0	0	0	0	0	0	0	0	0	0	0	0	0	0	0	0	0	0	0	0	0	0	0	0	0	0
mml-miR-410-5p	AGGTTGTCTGTGATGAGTTCG	1	mml-miR-410-5p	0	0	0	0	0	0	0	0	0	0	0	0	0	0	0	0	0	0	0	0	0	0	0	0	0	0	0	0	0	0
mml-miR-411-3p	TATGTAACACGGTCCACTAAC	1	mml-miR-411-3p	0	1	1	0	0	1	0	0	0	0	0	1	0	0	0	0	0	0	0	0	0	0	1	0	0	0	0	0	0	0
mml-miR-411-5p	TAGTAGACCGTATAGCGTACG	1	mml-miR-411-5p	2	3	3	2	2	4	2	1	3	0	0	4	1	0	0	0	0	1	1	1	1	2	2	0	0	0	0	0	1	0
mml-miR-412-3p	ACTTCACCTGGTCCACTAGCCGT	1	mml-miR-412-3p	0	0	0	0	0	0	0	0	0	0	0	0	0	0	0	0	0	0	0	0	0	0	0	0	0	0	0	0	0	0
mml-miR-412-5p	TGGTCGACCAGTTGGAAAGT	1	mml-miR-412-5p	0	0	0	0	0	0	0	0	0	0	0	0	0	0	0	0	0	0	0	0	0	0	0	0	0	0	0	0	0	0
mml-miR-421	ATCAACAGACATTAATTGGGCGC	1	mml-miR-421	58	68	73	76	91	73	70	61	81	66	54	72	66	80	54	82	66	60	88	89	130	55	89	60	59	88	53	93	109	84
mml-miR-422a	ACTGGACTCAGGGTCAGAAGGC	1	mml-miR-422a	0	0	0	0	0	0	0	0	0	0	0	0	0	0	0	0	0	0	0	0	0	0	0	0	0	0	0	0	0	0
mml-miR-423-3p	AGCTCGGTCTGAGGCCCCTCAGT	1	mml-miR-423-3p	5332	4258	4344	2773	2010	4487	3669	5072	3832	5606	6358	3207	4708	6200	6806	6850	8936	8118	6039	3423	4128	4118	5168	5495	10286	7428	7927	3439	3878	8017
mml-miR-423-5p	TGAGGGGCAGAGAGCGAGACTTT	1	mml-miR-423-5p	3295	2758	2675	3329	1801	2681	3185	3291	2453	5448	5012	3377	2766	2930	4418	2925	3925	2865	4930	3452	4555	2729	3262	3720	4036	4884	4558	2883	3237	4213
mml-miR-424-3p	AAAACGTGAGGCGCTGCTATA	1	mml-miR-424-3p	29	16	14	31	31	14	39	18	44	19	15	45	29	18	36	30	25	19	38	26	34	28	31	37	29	32	14	6	5	33
mml-miR-424-5p	CAGCAGCAATTCATGTTTTGAA	1	mml-miR-424-5p	63	45	41	117	100	61	98	35	122	30	23	106	78	18	73	67	50	51	67	66	70	59	67	56	37	69	14	18	13	51
mml-miR-425	AATGACACGATCACTCCCGTTGA	1	mml-miR-425	20653	14789	17651	12433	8262	13318	10736	23240	13550	12333	12294	7691	13852	20892	24454	25797	30847	30214	18555	14263	12801	11928	18139	16699	24787	28522	19338	16390	19413	20858
mml-miR-429-3p	TAATACTGTCTGGTAAAACCGT	1	mml-miR-429-3p	0	0	0	0	0	0	0	0	1	0	0	1	0	0	0	0	0	0	0	2	0	1	0	0	0	0	0	0	0	0
mml-miR-429-5p	GTCTTACCAGACACGGTTAGA	1	mml-miR-429-5p	0	0	0	0	0	0	0	0	0	0	0	0	0	0	0	0	0	0	0	0	0	0	0	0	0	0	0	0	0	0
mml-miR-431	TGTCTTGCAGGCCGTCATGCA	1	mml-miR-431	21	40	34	16	14	28	24	23	26	10	9	30	18	4	15	25	20	9	30	10	19	27	45	22	11	13	16	10	9	11
mml-miR-432-3p	TGGATGGCTCCTCCATGTCT	1	mml-miR-432-3p	0	0	0	0	0	0	0	0	0	0	0	0	0	0	0	0	1	0	0	0	0	0	0	0	0	0	0	0	0	0
mml-miR-432-5p	TCTTGGAGTAGGTCATTGGGTGG	1	mml-miR-432-5p	26	34	36	46	39	41	44	20	38	25	25	80	35	8	24	20	13	10	53	37	32	43	56	47	10	10	26	27	21	17
mml-miR-433-3p	ATCATGATGGGCTCCTCGGTGT	1	mml-miR-433-3p	2	1	1	0	0	1	0	1	0	0	0	0	0	0	0	1	0	0	1	0	0	0	2	0	1	0	1	1	1	0
mml-miR-433-5p	TACGGTGAGCCTGTCATTATTC	1	mml-miR-433-5p	0	0	0	0	0	0	0	0	0	0	0	0	0	0	0	0	0	0	0	0	0	0	0	0	0	0	0	0	0	0
mml-miR-448	TTGCATATGTAGGATGTCCCAT	1	mml-miR-448	0	0	0	0	0	0	0	0	0	0	0	0	0	0	0	0	0	0	0	0	0	0	0	0	0	0	0	0	0	0
mml-miR-449a-3p	CAGCTAACATGCAACTGCTGTC	1	mml-miR-449a-3p	0	0	0	0	0	0	0	0	0	0	0	0	0	0	0	0	0	0	0	0	0	0	0	0	0	0	0	0	0	0
mml-miR-449a-5p	TGGCAGTGTATTGTTAGCTGGT	1	mml-miR-449a-5p	1	1	0	0	1	0	7	3	6	2	2	6	1	0	0	1	0	0	0	1	0	2	1	1	0	0	1	1	1	0
mml-miR-449b-3p	CAGCCACAACTACCCTGCCACT	1	mml-miR-449b-3p	0	0	0	0	0	0	0	0	0	0	0	0	0	0	0	0	0	0	0	0	0	0	0	0	0	0	0	0	0	0
mml-miR-449b-5p	AGGCAGTGTATTGTTAGCTGGC	1	mml-miR-449b-5p	0	0	0	0	0	0	0	0	0	0	0	0	0	0	0	0	0	0	0	0	0	0	0	0	0	0	0	0	0	0
mml-miR-450a-1-3p	ATTGGGAACATTTTGCATGTGT	1	mml-miR-450a-1-3p	3	2	2	4	6	1	6	1	5	0	1	4	3	1	7	4	1	1	5	3	2	6	4	4	0	3	1	1	0	2
mml-miR-450a-2-3p	ATTGGGGACATTTTGCATTCAT	1	mml-miR-450a-2-3p	0	0	0	1	1	0	1	0	0	0	0	1	1	0	1	1	1	0	0	0	1	1	1	0	1	1	0	0	0	0
mml-miR-450a-5p	TTTTGCGATGTGTTCCTAATAT	2	mml-miR-450a-5p	1	0	0	0	0	0	0	0	1	0	0	0	0	0	0	1	1	0	0	0	0	0	0	0	1	0	0	0	0	1
mml-miR-450b-3p	TTGGGATCATTTTGCATCCATA	1	mml-miR-450b-3p	0	0	0	0	0	0	0	0	0	0	0	0	0	0	0	0	0	0	0	0	0	0	0	0	0	0	0	0	0	0
mml-miR-450b-5p	TTTTGCAATATGTTCCTGAATA	1	mml-miR-450b-5p	1	1	0	1	0	2	1	0	3	0	1	1	1	0	1	3	2	1	2	1	1	1	1	1	2	1	0	0	0	3
mml-miR-451	AAACCGTTACCATTACTGAGTT	1	mml-miR-451	48304	40849	40375	33808	16874	59925	23301	40119	44390	25372	22048	21606	29120	15412	33897	44577	45887	47186	42741	30466	39965	19209	44292	30349	51568	65626	43745	39682	38711	42366
mml-miR-452-3p	AGTCTCATCTGCAAAGAAGTAA	1	mml-miR-452-3p	0	0	0	0	0	0	0	0	0	0	0	0	0	0	0	0	0	0	0	0	0	0	0	0	0	0	0	0	0	0
mml-miR-452-5p	AACTGTTTGCAGAGGAAACTGA	1	mml-miR-452-5p	0	0	0	0	0	0	0	0	0	0	0	0	0	0	0	0	0	0	0	0	0	0	0	0	0	0	0	0	0	0
mml-miR-453	AGGTTGTCCGTGGTGAGTTCGCA	1	mml-miR-323b-5p,mml-miR-453	0	0	0	0	0	0	0	0	0	0	0	0	0	0	0	0	0	0	0	0	0	0	0	0	0	0	0	0	0	0
mml-miR-454-3p	TAGTGCAATATTGCTTATAGGGT	1	mml-miR-454-3p	512	409	318	571	852	309	764	391	783	302	252	550	377	167	199	375	114	166	300	570	208	797	603	520	137	119	245	463	457	146
mml-miR-454-5p	TATCAATATTGTCTCTGC	1	mml-miR-454-5p	0	0	0	0	0	0	0	0	0	0	0	0	0	0	0	0	0	0	0	0	0	0	0	0	0	0	0	0	0	0
mml-miR-455-3p	GCAGTCCATGGGCATATACAC	1	mml-miR-455-3p	0	0	0	0	0	0	0	0	0	0	0	0	0	0	0	0	0	0	0	0	0	0	0	0	0	0	0	0	0	0
mml-miR-455-5p	TATGTGCCTTTGGACTACATCG	1	mml-miR-455-5p	0	0	0	0	0	0	0	0	0	0	0	0	0	0	0	0	0	0	0	0	0	0	0	0	0	0	0	0	0	0
mml-miR-484	TCAGGCTCAGTCCCCTCCCGAT	1	mml-miR-484	12110	7727	8696	5482	2998	6114	6613	21871	6834	11767	12938	4060	9451	11401	21619	15818	18487	18366	13285	5560	6001	11585	11244	11900	19397	21891	14852	7537	9468	13965
mml-miR-485-3p	GTCATACACGGCTCTCCTCTCT	1	mml-miR-485-3p	291	458	540	318	201	490	184	267	123	292	296	247	403	345	261	318	247	248	505	350	464	485	499	308	161	147	251	321	299	173
mml-miR-485-5p	AGAGGCTGGCCGTGATGAATTC	1	mml-miR-485-5p	2	5	3	2	1	3	1	1	2	2	1	3	1	1	2	2	1	0	5	2	1	1	5	4	0	2	2	2	1	2
mml-miR-486-3p	CGGGGCAGCTCAGTACAGGAT	1	mml-miR-486-3p	3	1	0	1	1	3	1	2	2	1	0	1	1	0	4	1	4	3	4	0	1	1	3	4	1	3	1	0	1	0
mml-miR-486-5p	TCCTGTACTGAGCTGCCCCGAG	1	mml-miR-486-5p	138995	112201	130147	101694	63454	132028	75838	126526	65112	160610	204754	61118	162096	187131	186176	143826	178225	200992	126357	105242	98783	132322	104475	139546	203151	164641	170829	127580	124871	170210
mml-miR-487a	AATCATACAGGGACATCCAGTT	1	mml-miR-487a	0	0	0	0	0	0	0	0	0	0	0	0	0	0	0	0	0	0	0	0	0	0	0	0	0	0	0	0	0	0
mml-miR-487b-3p	AATCGTACAGGGTCATCCACTT	1	mml-miR-487b-3p	9	22	21	11	7	17	8	9	10	5	4	11	9	7	5	11	10	5	17	9	14	13	18	6	5	4	6	7	10	5
mml-miR-487b-5p	GTGGTTATCCCTGTCCTGTTCG	1	mml-miR-487b-5p	2	5	5	2	1	7	1	2	1	2	2	2	3	2	1	3	2	1	3	3	3	2	4	2	2	1	3	2	3	2
mml-miR-488-3p	TTGAAAGGCTATTTCTTGGTC	1	mml-miR-488-3p	0	0	0	0	0	0	0	0	0	0	0	0	0	0	0	0	0	0	0	0	0	0	0	0	0	0	0	0	0	0
mml-miR-488-5p	CCCAGATAATGGCACTCTCAAAC	1	mml-miR-488-5p	0	0	0	0	0	0	0	0	0	0	0	0	0	0	0	0	0	0	0	0	0	0	0	0	0	0	0	0	0	0
mml-miR-489-3p	GTGACATCACATATACGGCAGC	1	mml-miR-489-3p	0	0	0	0	0	0	0	0	0	0	0	0	0	0	0	0	0	0	0	0	0	0	0	0	0	0	0	0	0	0
mml-miR-489-5p	GGTCGTATGTGTGGCGCCATTT	1	mml-miR-489-5p	0	0	0	0	0	0	0	0	0	0	0	0	0	0	0	0	0	0	0	0	0	0	0	0	0	0	0	0	0	0
mml-miR-490-3p	CAACCTGGAGGACTCCATGCTG	1	mml-miR-490-3p	0	0	0	0	0	0	0	0	0	0	0	0	0	0	0	0	0	0	0	0	0	0	0	0	0	0	0	0	0	0
mml-miR-490-5p	CCATGGATCTCCAGGTGGGT	1	mml-miR-490-5p	0	0	0	0	0	0	0	0	0	0	0	0	0	0	0	0	0	0	0	0	0	0	0	0	0	0	0	0	0	0
mml-miR-491-3p	CTTATGCAAGATTCCCTTCTAC	1	mml-miR-491-3p	9	12	17	10	4	15	4	17	4	9	12	4	16	9	15	14	9	19	12	13	12	11	10	6	9	15	6	18	13	12
mml-miR-491-5p	AGTGGGGAACCCTTCCATGAGG	1	mml-miR-491-5p	148	157	160	95	61	123	126	228	117	157	166	91	147	183	253	210	318	209	225	113	158	188	170	144	263	271	158	95	126	188
mml-miR-492	AGGACCTGCGGGACAAGATTCTT	1	mml-miR-492	0	0	0	0	0	0	0	0	0	0	0	0	0	0	0	0	0	0	0	0	0	0	0	0	0	0	0	0	0	0
mml-miR-493-3p	TGAAGGTCTACTGTGTGCCAGG	1	mml-miR-493-3p	4	7	5	3	6	3	7	2	5	1	1	9	3	0	1	2	1	1	5	2	2	5	6	4	0	0	2	2	2	0
mml-miR-493-5p	TTGTACATGGTAGGCTTTCATT	1	mml-miR-493-5p	8	9	5	5	12	8	11	4	25	3	2	20	3	1	0	3	2	0	4	4	4	10	11	7	1	0	6	2	4	1
mml-miR-494-3p	TGAAACATACACGGGAAACCTC	1	mml-miR-494-3p	39	85	102	34	24	71	27	55	29	22	18	29	33	41	28	46	43	24	55	48	61	52	68	28	20	28	17	37	41	21
mml-miR-494-5p	AGGTTGTCCGTGTTGTCTTCTCT	1	mml-miR-494-5p	0	0	0	0	0	0	0	0	0	0	0	0	0	0	0	0	0	0	0	0	0	0	0	0	0	0	0	0	0	0
mml-miR-495-3p	AAACAAACATGGTGCACTTCTT	1	mml-miR-495-3p	0	0	1	0	0	2	0	0	1	0	0	0	0	0	0	0	0	0	0	0	2	0	0	0	0	1	0	0	0	0
mml-miR-495-5p	GAAGTTGCCCATGTTATTTTCG	1	mml-miR-495-5p	0	1	1	0	1	0	1	0	1	0	0	0	0	0	0	0	0	0	0	0	1	0	1	0	0	0	0	0	0	0
mml-miR-496	TGAGTATTACATGGCCAATCTC	1	mml-miR-496	0	1	2	0	0	3	1	1	1	0	0	1	0	0	0	1	2	0	1	1	1	1	1	0	0	0	0	1	1	0
mml-miR-497-3p	CAAACCACACTGTGGTGTTAGAGCGAG	1	mml-miR-497-3p	0	0	0	0	0	0	0	0	0	0	0	0	0	0	0	0	0	0	0	0	0	0	0	0	0	0	0	0	0	0
mml-miR-497-5p	CAGCAGCACACTGTGGTTTGT	1	mml-miR-497-5p	0	0	0	0	0	0	0	0	0	0	0	0	0	0	0	0	0	0	0	0	0	0	0	0	0	0	0	0	0	0
mml-miR-498	TTTCAAGCCAGGGGGCGTTTTTC	1	mml-miR-498	0	0	0	0	0	0	0	0	0	0	0	0	0	0	0	0	0	0	0	0	0	0	0	0	0	0	0	0	0	0
mml-miR-499-3p	AACATCACAGCAAGTCTGTGCT	1	mml-miR-499-3p	0	0	0	0	0	0	0	0	0	0	0	0	0	0	0	0	0	0	0	0	0	0	0	0	0	0	0	0	0	0
mml-miR-499-5p	TTAAGACTTGCAGTGATGTTT	1	mml-miR-499-5p	2	1	0	4	4	1	4	2	3	1	2	2	1	0	2	1	0	2	2	1	2	3	3	1	1	1	2	2	1	0
mml-miR-500a-3p	ATGCACCTGGGCAAGGATTCTGA	1	mml-miR-500a-3p	17	31	24	18	16	19	25	29	22	22	19	25	26	14	29	23	22	17	30	18	35	19	30	15	14	23	19	17	18	23
mml-miR-500a-5p	TAATCCTTGCTACCTGGGTGAGA	1	mml-miR-500a-5p,mml-miR-500b-5p	12	13	11	7	6	10	10	19	16	9	7	5	10	13	14	15	29	19	10	7	10	10	13	13	17	17	10	7	7	12
mml-miR-500b-3p	GCACCCAGGCAAGGATTCT	1	mml-miR-500b-3p,mml-miR-501-3p	1	0	0	0	0	0	0	1	0	1	0	1	1	1	1	2	1	1	0	0	2	0	1	0	0	1	1	0	0	1
mml-miR-500b-5p	TAATCCTTGCTACCTGGGTGAGA	1	mml-miR-500a-5p,mml-miR-500b-5p	10	10	11	5	7	9	8	14	14	8	6	5	7	12	10	13	26	13	12	8	8	10	11	9	12	13	6	5	9	10
mml-miR-501-3p	GCACCCAGGCAAGGATTCT	1	mml-miR-500b-3p,mml-miR-501-3p	0	0	1	0	0	2	0	1	1	1	0	0	1	1	1	2	1	1	1	0	2	0	1	0	0	1	0	1	1	1
mml-miR-501-5p	AATCCTTTGTCCCTGGGTGAGA	1	mml-miR-501-5p	0	1	1	0	0	0	0	0	0	0	1	0	0	1	0	1	2	0	1	0	1	1	0	1	2	1	0	0	1	1
mml-miR-502-3p	AATGCACCTGGGCAAGGATTCA	1	mml-miR-502-3p	19	29	23	14	13	21	20	29	25	19	17	15	24	15	32	30	37	27	32	16	29	22	31	20	25	38	19	14	17	22
mml-miR-502-5p	ATCCTTGCTATCTGGGTGCTA	1	mml-miR-502-5p	1	2	2	1	0	2	2	2	2	1	1	1	1	1	1	3	4	2	1	1	1	2	2	1	2	2	2	0	2	2
mml-miR-503-3p	GGAGTATTGTTTCCGCTGCCAGG	1	mml-miR-503-3p	41	38	32	50	53	29	63	36	52	34	31	59	54	60	44	55	52	37	50	68	52	83	50	60	44	41	20	16	19	52
mml-miR-503-5p	TAGCAGCGGGAACAGTTCTGCAG	1	mml-miR-503-5p	107	87	69	151	176	70	233	82	209	83	63	257	164	77	93	135	102	70	107	186	142	180	119	157	82	102	34	32	32	124
mml-miR-504-3p	GGGAGCGCAGGGCAGGGTTTC	1	mml-miR-504-3p	0	0	0	0	0	0	0	0	0	0	0	0	0	0	0	0	0	0	0	0	0	0	0	0	0	0	0	0	0	0
mml-miR-504-5p	AGACCCTGGTCTGCACTCTATC	1	mml-miR-504-5p	0	0	0	0	0	0	0	0	0	0	0	0	0	0	0	0	0	0	0	0	0	0	0	0	0	0	0	0	0	0
mml-miR-505-3p	CGTCAACACTTGCTGGTTTCCT	1	mml-miR-505-3p	33	69	76	33	57	88	35	38	39	61	54	47	80	63	37	66	53	43	72	37	83	23	74	30	78	50	75	47	39	103
mml-miR-505-5p	GGGGAGCCAGGAAGTATTGATGT	1	mml-miR-505-5p	5	5	5	5	4	5	4	2	4	4	3	5	5	5	4	5	4	4	8	3	10	1	8	3	6	5	4	3	4	7
mml-miR-506-3p	TAAGGCACCCTTCTGAGTAGA	1	mml-miR-506-3p	0	0	0	0	0	0	0	0	0	0	0	0	0	0	0	0	0	0	0	0	0	0	0	0	0	0	0	0	0	0
mml-miR-506-5p	TATTCAGGAAGGTGTTACTT	1	mml-miR-506-5p	0	0	0	0	0	0	0	0	0	0	0	0	0	0	0	0	0	0	0	0	0	0	0	0	0	0	0	0	0	0
mml-miR-507	TTTTGCACCTTTTGGAGTGAA	1	mml-miR-507	0	0	0	0	0	0	0	0	0	0	0	0	0	0	0	0	0	0	0	0	0	0	0	0	0	0	0	0	0	0
mml-miR-508-3p	TGATTGTCGCCTTTTTGAGTAGA	1	mml-miR-508-3p	0	0	0	0	0	0	0	0	0	0	0	0	0	0	0	0	0	0	0	0	0	0	0	0	0	0	0	0	0	0
mml-miR-508-5p	TACTCCAGAGGGCGTCACTCA	1	mml-miR-508-5p	0	0	0	0	0	0	0	0	0	0	0	0	0	0	0	0	0	0	0	0	0	0	0	0	0	0	0	0	0	0
mml-miR-509	TGATTGGTATGTCTGTGGGTAGA	2	mml-miR-509	0	0	0	0	0	0	0	0	0	0	0	0	0	0	0	0	0	0	0	0	0	0	0	0	0	0	0	0	0	0
mml-miR-510-3p	TGATTGAAACCTCTAAGAGTGGA	1	mml-miR-510-3p	0	0	0	0	0	0	0	0	0	0	0	0	0	0	0	0	0	0	0	0	0	0	0	0	0	0	0	0	0	0
mml-miR-510-5p	TACTCCGGAGAGTGGCAATCACA	1	mml-miR-510-5p	0	0	0	0	0	0	0	0	0	0	0	0	0	0	0	0	0	0	0	0	0	0	0	0	0	0	0	0	0	0
mml-miR-511-3p	AATGTGTAGCAAAAGACAGAAT	1	mml-miR-511-3p	0	0	0	0	0	0	0	0	0	0	0	0	0	0	0	0	0	0	0	0	0	0	0	0	0	0	0	0	0	0
mml-miR-511-5p	TGTCTTTTGCTCTGCAGTCA	1	mml-miR-511-5p	0	0	0	0	0	0	0	0	0	0	0	0	0	0	0	0	0	0	0	0	0	0	0	0	0	0	0	0	0	0
mml-miR-512-3p	AAGTGCTGTCATTGCTGAGATC	1	mml-miR-512-3p	0	0	0	0	0	0	0	0	0	0	0	0	0	0	0	0	0	0	0	0	0	0	0	0	0	0	0	0	0	0
mml-miR-512-5p	CACTCAGCCTCGGGGGCACTTTC	1	mml-miR-512-5p	0	0	0	0	0	0	0	0	0	0	0	0	0	0	0	0	0	0	0	0	0	0	0	0	0	0	0	0	0	0
mml-miR-513a	TTCACAGGGAGGTGTCATTTAT	3	mml-miR-513a	0	0	0	0	0	0	0	0	0	0	0	0	0	0	0	0	0	0	0	0	0	0	0	0	0	0	0	0	0	0
mml-miR-513b	TTCACAAGGAGGTGTCATTTAT	2	mml-miR-513b	0	0	0	0	0	0	0	0	0	0	0	0	0	0	0	0	0	0	0	0	0	0	0	0	0	0	0	0	0	0
mml-miR-514a-3p	ATTGACACTTCTGTGAGTAGA	1	mml-miR-514a-3p	0	0	0	0	0	0	0	0	0	0	0	0	0	0	0	0	0	0	0	0	0	0	0	0	0	0	0	0	0	0
mml-miR-514a-5p	TACTCTGGAGAGTGACAATCA	1	mml-miR-514a-5p	0	0	0	0	0	0	0	0	0	0	0	0	0	0	0	0	0	0	0	0	0	0	0	0	0	0	0	0	0	0
mml-miR-514b-3p	ATTGACACCTCTGTGAGTAGA	1	mml-miR-514b-3p	0	0	0	0	0	0	0	0	0	0	0	0	0	0	0	0	0	0	0	0	0	0	0	0	0	0	0	0	0	0
mml-miR-514b-5p	TTCTCAAGAGGGAGGCAATCA	1	mml-miR-514b-5p	0	0	0	0	0	0	0	0	0	0	0	0	0	0	0	0	0	0	0	0	0	0	0	0	0	0	0	0	0	0
mml-miR-516a-3p	TGTTTCCTTCCCGAGGGT	2	mml-miR-516a-3p	0	0	0	0	0	0	0	0	0	0	0	0	0	0	0	0	0	0	0	0	0	0	0	0	0	0	0	0	0	0
mml-miR-516a-5p	GTCTCGAGGAAAGAAGCACTTT	2	mml-miR-516a-5p	0	0	0	0	0	0	0	0	0	0	0	0	0	0	0	0	0	0	0	0	0	0	0	0	0	0	0	0	0	0
mml-miR-516b	ATCTGGAGGTAAGAAGCACTTT	1	mml-miR-516b	0	0	0	0	0	0	0	0	0	0	0	0	0	0	0	0	0	0	0	0	0	0	0	0	0	0	0	0	0	0
mml-miR-517a	ATCGTGCATCCTTTTAGAGTGT	1	mml-miR-517a	0	0	0	0	0	0	0	0	0	0	0	0	0	0	0	0	0	0	0	0	0	0	0	0	0	0	0	0	0	0
mml-miR-517c	ATCGTGCAGCCTTTTAGAGTG	1	mml-miR-517c	0	0	0	0	0	0	0	0	0	0	0	0	0	0	0	0	0	0	0	0	0	0	0	0	0	0	0	0	0	0
mml-miR-518a-3p	AAAGTGCTTCTCTTTGCTGGG	2	mml-miR-518a-3p	0	0	0	0	0	0	0	0	0	0	0	0	0	0	0	0	0	0	0	0	0	0	0	0	0	0	0	0	0	0
mml-miR-518a-5p	CTACAAAGGGAAGCCCTTTCT	2	mml-miR-518a-5p	0	0	0	0	0	0	0	0	0	0	0	0	0	0	0	0	0	0	0	0	0	0	0	0	0	0	0	0	0	0
mml-miR-518b	CAAAGCGCTCCCCTTTAGAGG	1	mml-miR-518b	0	0	0	0	0	0	0	0	0	0	0	0	0	0	0	0	0	0	0	0	0	0	0	0	0	0	0	0	0	0
mml-miR-518c-3p	CAAAGCGCTTCTCTTTAGAGAGT	1	mml-miR-518c-3p	0	0	0	0	0	0	0	0	0	0	0	0	0	0	0	0	0	0	0	0	0	0	0	0	0	0	0	0	0	0
mml-miR-518c-5p	TGGAGGGAAGCGCTTTCTGTT	1	mml-miR-518c-5p	0	0	0	0	0	0	0	0	0	0	0	0	0	0	0	0	0	0	0	0	0	0	0	0	0	0	0	0	0	0
mml-miR-518d-3p	GAAGCGCTTCTCTTTAGAGTG	2	mml-miR-518d-3p	0	0	0	0	0	0	0	0	0	0	0	0	0	0	0	0	0	0	0	0	0	0	0	0	0	0	0	0	0	0
mml-miR-518d-5p	CTCTAGAGGAAAGCGCTTACTG	2	mml-miR-518d-5p	0	0	0	0	0	0	0	0	0	0	0	0	0	0	0	0	0	0	0	0	0	0	0	0	0	0	0	0	0	0
mml-miR-518e	AAAATGGTTCCCTTTAGAGTGT	1	mml-miR-518e	0	0	0	0	0	0	0	0	0	0	0	0	0	0	0	0	0	0	0	0	0	0	0	0	0	0	0	0	0	0
mml-miR-518f	AAAGCGCTTCCCTTCAGAGGA	1	mml-miR-518f	0	0	0	0	0	0	0	0	0	0	0	0	0	0	0	0	0	0	0	0	0	0	0	0	0	0	0	0	0	0
mml-miR-518g-3p	AGGAAGCACTTCCCTTTAGAGTG	1	mml-miR-518g-3p	0	0	0	0	0	0	0	0	0	0	0	0	0	0	0	0	0	0	0	0	0	0	0	0	0	0	0	0	0	0
mml-miR-518g-5p	CTCTAGAGGAAAGCGCTTTCTGT	1	mml-miR-518g-5p	0	0	0	0	0	0	0	0	0	0	0	0	0	0	0	0	0	0	0	0	0	0	0	0	0	0	0	0	0	0
mml-miR-519a-3p	AAAGTGCTTCCTTTTAGAGGGTTAC	1	mml-miR-519a-3p	0	0	0	0	0	0	0	0	0	0	0	0	0	0	0	0	0	0	0	0	0	0	0	0	0	0	0	0	0	0
mml-miR-519a-5p	CCTCTAGAGGGAAGCGCTTTCT	1	mml-miR-519a-5p	0	0	0	0	0	0	0	0	0	0	0	0	0	0	0	0	0	0	0	0	0	0	0	0	0	0	0	0	0	0
mml-miR-519b	AACGTGCATCCCTTTAGAGGGTT	1	mml-miR-519b	0	0	0	0	0	0	0	0	0	0	0	0	0	0	0	0	0	0	0	0	0	0	0	0	0	0	0	0	0	0
mml-miR-519c	AAAGTGCATCATTTTAGAGGAT	1	mml-miR-519c	0	0	0	0	0	0	0	0	0	0	0	0	0	0	0	0	0	0	0	0	0	0	0	0	0	0	0	0	0	0
mml-miR-519d	CAAAGTGCTTCCTTTTAGAGTG	1	mml-miR-519d	0	0	0	0	0	0	0	0	0	0	0	0	0	0	0	0	0	0	0	0	0	0	0	0	0	0	0	0	0	0
mml-miR-519e	TTCTCCAATGGGAAGCACCTTC	1	mml-miR-519e	0	0	0	0	0	0	0	0	0	0	0	0	0	0	0	0	0	0	0	0	0	0	0	0	0	0	0	0	0	0
mml-miR-520a-3p	AAAGTGCTTCCCTTTGGACTGT	1	mml-miR-520a-3p	0	0	0	0	0	0	0	0	0	0	0	0	0	0	0	0	0	0	0	0	0	0	0	0	0	0	0	0	0	0
mml-miR-520a-5p	TCCAGAGGGAAGTATTTTCT	1	mml-miR-520a-5p	0	0	0	0	0	0	0	0	0	0	0	0	0	0	0	0	0	0	0	0	0	0	0	0	0	0	0	0	0	0
mml-miR-520g	ACAAAGTGCTTCCCTTCAGAGTGT	1	mml-miR-520g	0	0	0	0	0	0	0	0	0	0	0	0	0	0	0	0	0	0	0	0	0	0	0	0	0	0	0	0	0	0
mml-miR-521	AACGCACTTCCCTTTGGAGTGT	1	mml-miR-521	0	0	0	0	0	0	0	0	0	0	0	0	0	0	0	0	0	0	0	0	0	0	0	0	0	0	0	0	0	0
mml-miR-523a	AATGCGCTTCCCTTTAGAGGG	1	mml-miR-523a	0	0	0	0	0	0	0	0	0	0	0	0	0	0	0	0	0	0	0	0	0	0	0	0	0	0	0	0	0	0
mml-miR-523b	CTCTAGAGCGAAGCGCTTTCTG	1	mml-miR-523b	0	0	0	0	0	0	0	0	0	0	0	0	0	0	0	0	0	0	0	0	0	0	0	0	0	0	0	0	0	0
mml-miR-524-3p	GAAGGTGCTTCCCTTTGCAGTG	1	mml-miR-524-3p	0	0	0	0	0	0	0	0	0	0	0	0	0	0	0	0	0	0	0	0	0	0	0	0	0	0	0	0	0	0
mml-miR-524-5p	CTACAAAGGCAAGCACTTTCTC	1	mml-miR-524-5p	0	0	0	0	0	0	0	0	0	0	0	0	0	0	0	0	0	0	0	0	0	0	0	0	0	0	0	0	0	0
mml-miR-525	CTCCAGAGGGATGCACTTTCT	1	mml-miR-525	0	0	0	0	0	0	0	0	0	0	0	0	0	0	0	0	0	0	0	0	0	0	0	0	0	0	0	0	0	0
mml-miR-526b	CTCTTGAGGGAAGCACTTTCTGT	1	mml-miR-526b	0	0	0	0	0	0	0	0	0	0	0	0	0	0	0	0	0	0	0	0	0	0	0	0	0	0	0	0	0	0
mml-miR-532-3p	CCTCCCACACCCAAGGCTTGCA	1	mml-miR-532-3p	585	602	719	600	405	644	429	744	297	887	1026	433	890	1094	1135	716	632	776	658	610	739	810	530	522	624	642	665	669	555	669
mml-miR-532-5p	CATGCCTTGAGTGTAGGACCGT	1	mml-miR-532-5p	90	146	116	135	138	102	125	166	96	99	98	119	132	120	187	144	122	114	157	91	195	172	125	69	69	110	68	100	105	81
mml-miR-539	GGAGAAATTATCCTTGGTGTGT	1	mml-miR-539	0	0	0	0	0	0	0	0	0	0	0	0	0	0	0	0	0	0	0	0	0	0	0	0	0	0	0	0	0	0
mml-miR-541-3p	TGGTGGGCACAGAATCCGGACT	1	mml-miR-541-3p	0	0	0	0	0	0	0	0	0	0	0	0	0	0	0	0	0	0	0	0	0	0	0	0	0	0	0	0	0	0
mml-miR-541-5p	AAAGGATTCTGCTGTCGGTCCCACT	1	mml-miR-541-5p	0	0	0	0	0	0	0	0	0	0	0	0	0	0	0	0	0	0	0	0	0	0	0	0	0	0	0	0	0	0
mml-miR-542-3p	TGTGACAGATTGATAACTGAAA	1	mml-miR-542-3p	2	1	0	3	4	1	2	0	5	1	0	4	2	0	1	3	0	0	3	2	2	2	2	1	0	1	0	1	0	0
mml-miR-542-5p	TCGGGGATCATCATGTCACGAGA	1	mml-miR-542-5p	1	3	1	4	3	1	4	2	3	2	2	5	4	1	3	4	3	1	4	3	3	4	3	2	2	3	1	1	1	4
mml-miR-543-3p	AAACATTCGCGGTGCACTTCTT	1	mml-miR-543-3p	7	11	10	4	4	12	5	9	8	4	3	7	6	5	3	8	10	3	12	6	10	4	17	9	6	5	6	3	5	5
mml-miR-543-5p	GAAGTTGCCCGTGTCTTTTTCG	1	mml-miR-543-5p	1	2	2	1	0	3	1	2	1	1	1	2	1	1	1	2	2	0	1	1	2	1	3	1	1	1	1	1	1	1
mml-miR-544	ATTCTGCATTTTTAGCAAGTTC	1	mml-miR-544	0	0	0	0	0	0	0	0	0	0	0	0	0	0	0	0	0	0	0	0	0	0	0	0	0	0	0	0	0	0
mml-miR-545	TCAGCAAACATTTATTGTGTGC	1	mml-miR-545	0	0	0	0	0	0	0	0	0	0	0	0	0	0	0	0	0	0	0	0	0	0	0	0	0	0	0	0	0	0
mml-miR-548a	CAATACTGGCAATTACTTTTCC	1	mml-miR-548a	0	0	0	0	0	0	0	0	0	0	0	0	0	0	0	0	0	0	0	0	0	0	0	0	0	0	0	0	0	0
mml-miR-548b	CAAAAACCTCAATTGCTTTTGT	1	mml-miR-548b	0	0	0	0	0	0	0	0	0	0	0	0	0	0	0	0	0	0	0	0	0	0	0	0	0	0	0	0	0	0
mml-miR-548c	CAAAACCGGCAATTACTTCTGC	1	mml-miR-548c	0	0	0	0	0	0	0	0	0	0	0	0	0	0	0	0	0	0	0	0	0	0	0	0	0	0	0	0	0	0
mml-miR-548d-3p	CAAAAACCACAATTTCTTTTGC	1	mml-miR-548d-3p	0	1	0	0	0	1	0	0	0	0	0	0	0	0	0	0	0	0	1	0	1	0	1	0	0	1	0	1	0	0
mml-miR-548d-5p	GGCAAAAACCACAATTTCTTTT	1	mml-miR-548d-5p	0	0	0	0	0	0	0	0	0	0	0	0	0	0	0	0	0	0	0	0	0	0	0	0	0	0	0	0	0	0
mml-miR-548e	CAAAACCGGCAGTTACTTTTGC	1	mml-miR-548e	0	0	0	0	0	0	0	0	0	0	0	0	0	0	0	0	0	0	0	0	0	0	0	0	0	0	0	0	0	0
mml-miR-548f	CAAAACCACAGTTCCTTTTGC	1	mml-miR-548f	0	0	0	0	0	0	0	0	0	0	0	0	0	0	0	0	0	0	0	0	0	0	0	0	0	0	0	0	0	0
mml-miR-548g-3p	GCAAAAACCATAATTACTTTTG	1	mml-miR-548g-3p	0	0	0	0	0	0	0	0	0	0	0	0	0	0	0	0	0	0	0	0	0	0	0	0	0	0	0	0	0	0
mml-miR-548g-5p	AGAGTAATTGTGGTTTCTGTCA	1	mml-miR-548g-5p	0	0	0	0	0	0	0	0	0	0	0	0	0	0	0	0	0	0	0	0	0	0	0	0	0	0	0	0	0	0
mml-miR-548h-3p	CAAAAACTGCAGTGACTTCTGT	1	mml-miR-548h-3p	0	0	0	0	0	0	0	0	0	0	0	0	0	0	0	0	0	0	0	0	0	0	0	0	0	0	0	0	0	0
mml-miR-548h-5p	AGAAGTAATTGCTGTTTTTGCC	1	mml-miR-548h-5p	0	0	0	0	0	0	0	0	0	0	0	0	0	0	0	0	0	0	0	0	0	0	0	0	0	0	0	0	0	0
mml-miR-548i-3p	CAAAATCGTCTATGACTTTTGC	1	mml-miR-548i-3p	0	0	0	0	0	0	0	0	0	0	0	0	0	0	0	0	0	0	0	0	0	0	0	0	0	0	0	0	0	0
mml-miR-548i-5p	AAAGGTCATTGCAGATTTTGCC	1	mml-miR-548i-5p	0	0	0	0	0	0	0	0	0	0	0	0	0	0	0	0	0	0	0	0	0	0	0	0	0	0	0	0	0	0
mml-miR-548j-3p	AAAAACCGCAATTACTTTTGC	1	mml-miR-548j-3p	0	0	0	0	0	0	0	0	0	0	0	0	0	0	0	0	0	0	0	0	0	0	0	0	0	0	0	0	0	0
mml-miR-548j-5p	AAAAGTAATTGTGGGCTTTGC	1	mml-miR-548j-5p	0	0	0	0	0	0	0	0	0	0	0	0	0	0	0	0	0	0	0	0	0	0	0	0	0	0	0	0	0	0
mml-miR-549	AGAGCTCATCCATAGTTGTCA	1	mml-miR-549	0	0	0	0	0	0	0	0	0	0	0	0	0	0	0	0	0	0	0	0	0	0	0	0	0	0	0	0	0	0
mml-miR-549b-3p	GACAACTATGGATGAGCTCTCA	1	mml-miR-549b-3p	0	0	0	0	0	0	0	0	0	0	0	0	0	0	0	0	0	0	0	0	0	0	0	0	0	0	0	0	0	0
mml-miR-549b-5p	AGAGCTCATCCATAATTGTCAT	1	mml-miR-549b-5p	0	0	0	0	0	0	0	0	0	0	0	0	0	0	0	0	0	0	0	0	0	0	0	0	0	0	0	0	0	0
mml-miR-550-3p	CCTACTCCCTCAGGCACATC	1	mml-miR-550-3p	4	4	3	3	1	3	2	5	3	4	4	3	4	4	3	5	4	5	5	3	3	1	5	3	6	5	5	3	1	5
mml-miR-550-5p	AGTGCCTGAGGGAGTAAGAGCCC	1	mml-miR-550-5p	0	1	0	1	1	0	1	0	1	2	0	1	1	1	1	0	1	1	1	1	1	0	0	1	1	1	1	0	1	1
mml-miR-551a	GCGACCCACTCTTGGTTTCCA	1	mml-miR-551a	0	0	0	0	0	0	1	4	0	2	2	1	0	1	2	0	0	2	4	11	5	8	3	7	0	0	2	2	2	0
mml-miR-551b-3p	GCGACCCATACTTGGTTTCAG	1	mml-miR-551b-3p	0	0	0	0	0	0	0	0	0	0	0	0	0	0	0	0	0	0	0	0	0	0	0	0	0	0	0	0	0	0
mml-miR-551b-5p	GAAATCAAGCGTGGGTGAGA	1	mml-miR-551b-5p	0	0	0	0	0	0	0	0	0	0	0	0	0	0	0	0	0	0	0	0	0	0	0	0	0	0	0	0	0	0
mml-miR-552	AACGGGTGACTGGTTAGACAA	1	mml-miR-552	0	0	0	0	0	0	0	0	0	0	0	0	0	0	0	0	0	0	0	0	0	0	0	0	0	0	0	0	0	0
mml-miR-553	AAAAAGGTGAGGTTTTGTTTT	1	mml-miR-553	0	0	0	0	0	0	0	0	0	0	0	0	0	0	0	0	0	0	0	0	0	0	0	0	0	0	0	0	0	0
mml-miR-554	GCTAGTCCTGACTCAGCCAGT	1	mml-miR-554	0	0	0	0	0	0	0	0	0	0	0	0	0	0	0	0	0	0	0	0	0	0	0	0	0	0	0	0	0	0
mml-miR-556-3p	ATATTACAATTAGCTGATCTTT	1	mml-miR-556-3p	0	0	0	0	0	0	0	0	0	0	0	0	0	0	0	0	0	0	0	0	0	0	0	0	0	0	0	0	0	0
mml-miR-556-5p	GATGAACTCATTGTAATATGAG	1	mml-miR-556-5p	0	0	0	0	0	0	0	0	0	0	0	0	0	0	0	0	0	0	0	0	0	0	0	0	0	0	0	0	0	0
mml-miR-557	GTCTGCATGGGTGAGCCTTATCT	1	mml-miR-557	0	0	0	0	0	0	0	0	0	0	0	0	0	0	0	0	0	0	0	0	0	0	0	0	0	0	0	0	0	0
mml-miR-558	TGAGCTGCTGTACCAAAAT	1	mml-miR-558	0	0	0	0	0	0	0	0	0	0	0	0	0	0	0	0	0	0	0	0	0	0	0	0	0	0	0	0	0	0
mml-miR-562	AAAGTAGCTGTACCATTTGC	1	mml-miR-562	0	0	0	0	0	0	0	0	0	0	0	0	0	0	0	0	0	0	0	0	0	0	0	0	0	0	0	0	0	0
mml-miR-563	AGGCTGACATACATTTCCC	1	mml-miR-563	0	0	0	0	0	0	0	0	0	0	0	0	0	0	0	0	0	0	0	0	0	0	0	0	0	0	0	0	0	0
mml-miR-567	ACTATGTTCTTCCAGGACAGAAC	1	mml-miR-567	0	0	0	0	0	0	0	0	0	0	0	0	0	0	0	0	0	0	0	0	0	0	0	0	0	0	0	0	0	0
mml-miR-568	ATGTATAAATGTATACACAC	1	mml-miR-568	0	0	0	0	0	0	0	0	0	0	0	0	0	0	0	0	0	0	0	0	0	0	0	0	0	0	0	0	0	0
mml-miR-569	AGTTAATGAATCCTGGAAAGT	1	mml-miR-569	0	0	0	0	0	0	0	0	0	0	0	0	0	0	0	0	0	0	0	0	0	0	0	0	0	0	0	0	0	0
mml-miR-570	CAAAAGTAGCAATTACCTTTGC	1	mml-miR-570	0	0	0	0	0	0	0	0	0	0	0	0	0	0	0	0	0	0	0	0	0	0	0	0	0	0	0	0	0	0
mml-miR-571	GAGTTGGCCACCTGGGTGAG	1	mml-miR-571	0	0	0	0	0	0	0	0	0	0	0	0	0	0	0	0	0	0	0	0	0	0	0	0	0	0	0	0	0	0
mml-miR-572	GTCCGCTCGGCGGTGGCCCA	1	mml-miR-572	0	0	0	0	0	0	0	0	0	0	0	0	0	0	0	0	0	0	0	0	0	0	0	0	0	0	0	0	0	0
mml-miR-573	CTGAAGTGATGCATAACCGATCAG	1	mml-miR-573	0	0	0	0	0	0	0	0	0	0	0	0	0	0	0	0	0	0	0	0	0	0	0	0	0	0	0	0	0	0
mml-miR-576-3p	AAGATGTGGAAAAATTGGAATC	1	mml-miR-576-3p	0	0	0	0	0	0	0	1	1	0	0	0	1	0	0	0	0	0	1	0	0	0	1	0	0	0	0	1	1	0
mml-miR-576-5p	ATTCTAATTTCTCCACATCTTT	1	mml-miR-576-5p	40	35	46	31	13	47	17	83	23	50	55	14	43	30	58	66	44	86	51	31	43	32	50	28	43	61	50	94	87	44
mml-miR-577-3p	GGTTTCAATACTTTATCTGCTC	1	mml-miR-577-3p	0	0	0	0	0	0	0	0	0	0	0	0	0	0	0	0	0	0	0	0	0	0	0	0	0	0	0	0	0	0
mml-miR-577-5p	TAGATAAAATATTGGTACCTG	1	mml-miR-577-5p	0	0	0	0	0	0	0	0	0	0	0	0	0	0	0	0	0	0	0	0	0	0	0	0	0	0	0	0	0	0
mml-miR-578	CTTCTTGTGCTCTGGGATTGT	1	mml-miR-578	0	0	0	0	0	0	0	0	0	0	0	0	0	0	0	0	0	0	0	0	0	0	0	0	0	0	0	0	0	0
mml-miR-579	TTCATTTGGTACAAACCGCGATT	1	mml-miR-579	0	0	0	0	0	0	0	0	0	0	0	0	0	0	0	0	0	0	0	0	0	0	0	0	0	0	0	0	0	0
mml-miR-580	TTGAGTCTGATGAATCATTAGG	1	mml-miR-580	0	0	0	0	1	0	0	0	0	0	0	0	0	0	1	0	0	0	0	0	0	0	0	0	0	0	0	0	0	0
mml-miR-581	TCTTGTGTTCTGTAGATCAGT	1	mml-miR-581	0	0	0	0	0	0	0	0	0	0	0	0	0	0	0	0	0	0	0	0	0	0	0	0	0	0	0	0	0	0
mml-miR-582-3p	TAACTGGTTGAACAACTGAACC	1	mml-miR-582-3p	0	12	13	1	1	20	0	8	2	6	5	1	4	0	0	5	7	0	1	3	1	3	1	2	6	7	9	13	19	7
mml-miR-582-5p	TTACAGTTGTTCAACCAGTTACT	1	mml-miR-582-5p	0	2	1	0	0	1	0	1	0	0	0	0	1	0	0	0	0	0	0	0	0	0	0	0	0	0	0	2	2	0
mml-miR-583	CAAAGAGGAAGGTCCCAGTAC	1	mml-miR-583	0	0	0	0	0	0	0	0	0	0	0	0	0	0	0	0	0	0	0	0	0	0	0	0	0	0	0	0	0	0
mml-miR-584-3p	AGTTCCAGGCCAACCAGGCTG	1	mml-miR-584-3p	11	17	18	7	7	23	12	29	18	45	41	16	18	40	38	15	21	36	19	19	24	16	17	17	42	36	20	14	19	43
mml-miR-584-5p	TTATGGTTTGCCTGGGACTGAG	1	mml-miR-584-5p	365	541	467	392	487	337	1033	885	961	553	554	929	470	425	883	460	276	409	690	527	409	1215	695	844	388	619	391	274	233	408
mml-miR-586	TATGCATATTGTATTTTTAGGTCC	1	mml-miR-586	0	0	0	0	0	0	0	0	0	0	0	0	0	0	0	0	0	0	0	0	0	0	0	0	0	0	0	0	0	0
mml-miR-587	TTTCCACAGGTGATGAGTTAC	1	mml-miR-587	0	0	0	0	0	0	0	0	0	0	0	0	0	0	0	0	0	0	0	0	0	0	0	0	0	0	0	0	0	0
mml-miR-589	TGAGAACCACGTCTGCTCTGAG	1	mml-miR-589	0	0	0	0	0	0	0	0	0	0	0	0	0	0	0	0	0	0	0	0	0	0	0	0	0	0	0	0	0	0
mml-miR-590-3p	TAATTTTATGTATAAGCTGGT	1	mml-miR-590-3p	5	4	1	7	11	3	7	2	11	2	3	8	3	1	0	3	0	1	2	4	1	6	5	4	0	0	1	2	4	0
mml-miR-590-5p	GAGCTTATTCATAAAAGTGCAG	1	mml-miR-590-5p	0	0	0	0	0	0	0	0	0	0	0	0	0	0	0	0	0	0	0	0	0	0	0	0	0	0	0	0	0	0
mml-miR-592-3p	TCATCACGTGGTGACGCAACA	1	mml-miR-592-3p	0	0	0	0	0	0	0	0	0	0	0	0	0	0	0	0	0	0	0	0	0	0	0	0	0	0	0	0	0	0
mml-miR-592-5p	TTGTGTCAATATGCGATGATGT	1	mml-miR-592-5p	0	0	0	0	0	0	0	0	0	0	0	0	0	0	0	0	0	0	0	0	0	0	0	0	0	0	0	0	0	0
mml-miR-593	TGTCTCTGCTGGGGTTTCT	1	mml-miR-593	0	0	0	0	0	0	0	0	0	0	0	0	0	0	0	0	0	0	0	0	0	0	0	0	0	0	0	0	0	0
mml-miR-595	GAAGTGTGCTGTGGTGTGTCT	1	mml-miR-595	0	0	0	0	0	0	0	0	0	0	0	0	0	0	0	0	0	0	0	0	0	0	0	0	0	0	0	0	0	0
mml-miR-597	TGTGTCACTTGACGACCACTGT	1	mml-miR-597	0	0	0	0	0	0	0	0	0	0	0	0	0	0	0	0	0	0	0	0	0	0	0	0	0	0	0	0	0	0
mml-miR-598-3p	TACGTCATCGTTGTCATCGTCA	1	mml-miR-598-3p	1	3	4	2	3	4	1	1	2	1	1	2	4	1	3	3	1	2	3	2	3	2	2	1	1	4	1	1	2	2
mml-miR-598-5p	GCGGTGATCCCGATGGTGTGAGC	1	mml-miR-598-5p	0	0	0	0	0	0	0	0	0	0	0	0	0	0	0	0	0	0	0	0	0	0	0	0	0	0	0	0	0	0
mml-miR-599-3p	GTTGTGTCAGTTTATCAAAC	1	mml-miR-599-3p	0	0	0	0	0	0	0	0	0	0	0	0	0	0	0	0	0	0	0	0	0	0	0	0	0	0	0	0	0	0
mml-miR-599-5p	TTTGATAAGCTGACATGGGACA	1	mml-miR-599-5p	0	0	0	0	0	0	0	0	0	0	0	0	0	0	0	0	0	0	0	0	0	0	0	0	0	0	0	0	0	0
mml-miR-600	AGTTACAGACAAGAGCCTTGCTC	1	mml-miR-600	0	0	0	0	0	0	0	0	0	0	0	0	0	0	0	0	0	0	0	0	0	0	0	0	0	0	0	0	0	0
mml-miR-601	TGGTCTAGGATTGTTGGAGGAG	1	mml-miR-601	0	0	0	0	0	0	0	0	0	0	0	0	0	0	0	0	0	0	0	0	0	0	0	0	0	0	0	0	0	0
mml-miR-603	CACACACTGCAATTACTTTTTC	1	mml-miR-603	0	0	0	0	0	0	0	0	0	0	0	0	0	0	0	0	0	0	0	0	0	0	0	0	0	0	0	0	0	0
mml-miR-604	GGCTGCGGGATTCAGGAC	1	mml-miR-604	0	0	0	0	0	0	0	0	0	0	0	0	0	0	0	0	0	0	0	0	0	0	0	0	0	0	0	0	0	0
mml-miR-605	TAAATCCCACGGTGCCTTCTCCT	1	mml-miR-605	1	1	1	0	0	1	0	2	1	2	2	0	1	2	1	0	0	2	2	1	0	1	2	1	2	1	1	0	0	1
mml-miR-607	GTTATAGATCTGGATTGGAAC	1	mml-miR-607	0	0	0	0	0	0	0	0	0	0	0	0	0	0	0	0	0	0	0	0	0	0	0	0	0	0	0	0	0	0
mml-miR-609	AGGGTGTTGCTCTCATCTCT	1	mml-miR-609	0	0	0	0	0	0	0	0	0	0	0	0	0	0	0	0	0	0	0	0	0	0	0	0	0	0	0	0	0	0
mml-miR-611	GCGAGGACCCCTCGGGGTCTGAC	1	mml-miR-611	0	0	0	0	0	0	0	0	0	0	0	0	0	0	0	0	0	0	0	0	0	0	0	0	0	0	0	0	0	0
mml-miR-612	CTGGGGAGGGCTTCTGAGCTCCT	1	mml-miR-612	0	0	0	0	0	0	0	0	0	0	0	0	0	0	0	0	0	0	0	0	0	0	0	0	0	0	0	0	0	0
mml-miR-615-3p	TCCGAGCCTGGGTCTCCCTCTT	1	mml-miR-615-3p	0	0	0	0	0	0	0	0	0	0	0	0	0	0	0	0	0	1	0	0	0	0	0	0	0	0	0	0	0	0
mml-miR-615-5p	GGGGGTCCCCGGTGCTCGGATC	1	mml-miR-615-5p	0	0	0	0	0	0	0	0	0	0	0	0	0	0	0	0	0	0	0	0	0	0	0	0	0	0	0	0	0	0
mml-miR-616	AAACCCTCCAATGACT	1	mml-miR-616	0	0	0	0	0	0	0	0	0	0	0	0	0	0	0	0	0	0	0	0	0	0	0	0	0	0	0	0	0	0
mml-miR-618	AAACTCTACTTGTCCTTCTGAGT	1	mml-miR-618	0	0	0	0	0	0	0	0	0	0	0	0	0	0	0	0	0	0	0	0	0	0	0	0	0	0	0	0	0	0
mml-miR-619	GATCTGGACATGTTTGTGCC	1	mml-miR-619	0	0	0	0	0	0	0	0	0	0	0	0	0	0	0	0	0	0	0	0	0	0	0	0	0	0	0	0	0	0
mml-miR-622	ACAGTCTGCTGAGGTTGGAGC	1	mml-miR-622	0	0	0	0	0	0	0	0	0	0	0	0	0	0	0	0	0	0	0	0	0	0	0	0	0	0	0	0	0	0
mml-miR-624	CACAAGATACTGGTATTACCT	1	mml-miR-624	0	1	1	0	0	1	0	1	1	0	0	0	0	0	0	1	0	0	1	0	1	0	1	0	0	0	0	1	1	0
mml-miR-625	GGACTGTAGAACTTTCTCCCT	1	mml-miR-625	0	0	0	0	0	0	0	0	0	0	0	0	0	0	0	0	0	0	0	0	0	0	0	0	0	0	0	0	0	0
mml-miR-626	AGCTGTCCGAAAATGTCTT	1	mml-miR-626	0	0	0	0	0	0	0	0	0	0	0	0	0	0	0	0	0	0	0	0	0	0	0	0	0	0	0	0	0	0
mml-miR-627-3p	TCCTCTTTTCTTAGAGACTCAC	1	mml-miR-627-3p	0	0	0	0	0	0	0	0	0	0	0	0	0	0	0	0	0	0	0	0	0	0	0	0	0	0	0	0	0	0
mml-miR-627-5p	TGAGTCTGTAAGAAAAGAGGAG	1	mml-miR-627-5p	59	63	66	92	116	64	62	52	77	74	55	83	69	54	43	75	47	36	75	90	110	46	77	59	35	50	41	83	80	65
mml-miR-628-3p	TCTAGTAAGAGTGGCAGTCGA	1	mml-miR-628-3p	7	10	7	6	12	8	12	6	13	8	6	13	5	7	4	6	6	6	11	11	11	8	13	8	6	5	8	9	11	6
mml-miR-628-5p	ATGCTGACATATTTACTAGAGG	1	mml-miR-628-5p	2	3	3	2	6	3	4	3	9	3	2	4	2	0	1	2	2	0	3	3	2	2	6	4	2	1	3	3	4	3
mml-miR-631	AGACCTGGCCCAGACCTCAGC	1	mml-miR-631	0	0	0	0	0	0	0	0	0	0	0	0	0	0	0	0	0	0	0	0	0	0	0	0	0	0	0	0	0	0
mml-miR-632	GTGTCTGCTTCCTGTGGGA	1	mml-miR-632	0	0	0	0	0	0	0	0	0	0	0	0	0	0	0	0	0	0	0	0	0	0	0	0	0	0	0	0	0	0
mml-miR-633	CTAATAGTATCTACCACAATAAA	1	mml-miR-633	0	0	0	0	0	0	0	0	0	0	0	0	0	0	0	0	0	0	0	0	0	0	0	0	0	0	0	0	0	0
mml-miR-636	TGTGCTTGCTCGTCCCGCCTGCA	1	mml-miR-636	14	12	14	10	8	11	11	18	9	19	22	7	16	24	27	23	26	27	17	11	12	17	12	18	30	28	22	16	16	31
mml-miR-638	AGGGATCGCGGGCGGGCGGCGGCCT	1	mml-miR-638	0	0	0	0	0	0	0	0	0	0	0	0	0	0	0	0	0	0	0	0	0	0	0	0	0	0	0	0	0	0
mml-miR-639	AGCGCAGCGGTCGCGAGCGCTCT	1	mml-miR-639	0	0	0	0	0	0	0	0	0	0	0	0	0	0	0	0	0	0	0	0	0	0	0	0	0	0	0	0	0	0
mml-miR-640	ATGATCCAGGAACCTGCCTCT	1	mml-miR-640	0	0	0	0	0	0	0	0	0	0	0	0	0	0	0	0	0	0	0	0	0	0	0	0	0	0	0	0	0	0
mml-miR-642	GTCCCTCTCCAAATGTGTCTTG	1	mml-miR-642	0	0	0	0	0	0	1	0	0	0	0	0	0	0	0	0	0	0	1	0	1	0	0	0	0	1	1	1	0	1
mml-miR-643	ACTTGTATTCTAGCTCAGGTAG	1	mml-miR-643	0	0	0	0	0	0	0	0	0	0	0	0	1	0	0	0	0	0	0	0	0	0	0	0	0	0	0	0	0	0
mml-miR-644	AGTGTGGCTTGCTTAGAGC	1	mml-miR-644	0	0	0	0	0	0	0	0	0	0	0	0	0	0	0	0	0	0	0	0	0	0	0	0	0	0	0	0	0	0
mml-miR-648	AAGTGTGCAGGGCACTGAT	1	mml-miR-648	0	0	0	0	0	0	0	0	0	0	0	0	0	0	0	0	0	0	0	0	0	0	0	0	0	0	0	0	0	0
mml-miR-649	AAACCTGTGTTGTTCAAGAGTC	1	mml-miR-649	0	0	0	0	0	0	0	0	0	0	0	0	0	0	0	0	0	0	0	0	0	0	0	0	0	0	0	0	0	0
mml-miR-650a	AGGAGGCAGCGCTCTCAGGAC	2	mml-miR-650a	0	0	0	0	0	0	0	0	0	0	0	0	0	0	0	0	0	0	0	0	0	0	0	0	0	0	0	0	0	0
mml-miR-650b	AGGAGGCAGCGCTCTCGGGAC	1	mml-miR-650b	0	0	0	0	0	0	0	0	0	0	0	0	0	0	0	0	0	0	0	0	0	0	0	0	0	0	0	0	0	0
mml-miR-650c	AGGAGGCAGCGCTCTCAG	1	mml-miR-650c	0	0	0	0	0	0	0	0	0	0	0	0	0	0	0	0	0	0	0	0	0	0	0	0	0	0	0	0	0	0
mml-miR-650d	AGGAGACAGTGCTGTCGGGAC	1	mml-miR-650d	0	0	0	0	0	0	0	0	0	0	0	0	0	0	0	0	0	0	0	0	0	0	0	0	0	0	0	0	0	0
mml-miR-651	TTTAGAATAAGCTTGACTTTTG	1	mml-miR-651	0	0	0	0	0	0	0	0	0	0	0	0	0	0	0	0	0	0	0	0	0	0	0	0	0	0	0	0	0	0
mml-miR-652	AATGGCGCCACTAGGGTTGTG	1	mml-miR-652	297	221	198	212	235	165	290	259	352	187	183	214	197	184	431	243	238	270	271	224	153	355	273	394	291	359	296	131	126	223
mml-miR-653-3p	TTCACTGGAGTTTGTTTCAATA	1	mml-miR-653-3p	0	0	0	0	0	0	0	0	0	0	0	0	0	0	0	0	0	0	0	0	0	0	0	0	0	0	0	0	0	0
mml-miR-653-5p	GTGTTGAAACAATCTCTACTG	1	mml-miR-653-5p	0	0	0	0	0	0	0	0	0	0	0	0	0	0	0	0	0	0	0	0	0	0	0	0	0	0	0	0	0	0
mml-miR-654-3p	TATGTCTGCTGACCATCACCTT	1	mml-miR-654-3p	198	590	584	134	69	552	131	256	133	114	112	149	256	159	135	310	324	183	255	211	311	255	327	127	127	115	155	208	287	124
mml-miR-654-5p	TGGTGGGCCGCAGAACATGTGC	1	mml-miR-654-5p	0	0	0	0	0	0	0	0	0	0	0	0	0	0	0	0	0	0	0	0	0	0	0	0	0	0	0	0	0	0
mml-miR-656-3p	AATATTATACAGTCAACCTCT	1	mml-miR-656-3p	0	1	1	0	0	3	0	0	0	1	0	0	0	0	0	1	0	0	0	0	1	0	1	1	0	0	0	0	1	1
mml-miR-656-5p	AGGTTGTCTGTGAGGTGTTCA	1	mml-miR-656-5p	0	0	0	0	0	0	0	0	0	0	0	0	0	0	0	0	0	0	0	0	0	0	0	0	0	0	0	0	0	0
mml-miR-657	GGCAGGTCCTCACCCTCTCTAGG	1	mml-miR-657	0	0	0	0	0	0	0	0	0	0	0	0	0	0	0	0	0	0	0	0	0	0	0	0	0	0	0	0	0	0
mml-miR-660-3p	ACCTCCTGTGTGCATGGATTAC	1	mml-miR-660-3p	2	2	3	1	1	3	1	3	2	3	3	1	4	4	3	5	5	6	3	2	2	1	2	2	3	4	2	3	3	3
mml-miR-660-5p	TACCCATTGCATATCGGAGTTG	1	mml-miR-660-5p	38	43	39	51	39	46	45	41	50	29	28	42	48	14	50	50	37	36	55	37	51	28	52	30	23	40	27	39	44	37
mml-miR-661	TGCCTGGGTATCTGGCCCGTGCGT	1	mml-miR-661	0	0	0	0	0	0	0	0	0	0	0	0	0	0	0	0	0	0	0	0	0	0	0	0	0	0	0	0	0	0
mml-miR-662	TCCCACGTTGTGGCCCAGCAG	1	mml-miR-662	0	0	0	0	0	0	0	0	0	0	0	0	0	0	0	0	0	0	0	0	0	0	0	0	0	0	0	0	0	0
mml-miR-663	AGGCGGGGCGCTGCGGGACCGC	1	mml-miR-663	0	0	0	0	0	0	0	0	0	0	0	0	0	0	0	0	0	0	0	0	0	0	0	0	0	0	0	0	0	0
mml-miR-664	TATTCATTTATCCCCAGCCTA	1	mml-miR-664	7	6	9	7	3	6	3	14	3	6	6	2	6	11	17	9	7	14	9	7	6	9	9	6	10	12	9	8	7	6
mml-miR-665	ACCAGGAGGCTGAGGCCCCT	1	mml-miR-665	0	0	0	0	0	0	0	0	0	0	0	0	0	0	0	0	0	0	0	0	0	0	0	0	0	0	0	0	0	0
mml-miR-668	TGTCACTCGGCTCGGCCCACTAC	1	mml-miR-668	1	2	1	0	0	1	0	0	1	0	0	1	0	0	0	0	1	0	1	0	1	0	1	0	0	0	0	0	0	0
mml-miR-670-3p	TTTCCTCATATTCATTCAGG	1	mml-miR-670-3p	0	0	0	0	0	0	0	0	0	0	0	0	0	0	0	0	0	0	0	0	0	0	0	0	0	0	0	0	0	0
mml-miR-670-5p	TCCCTGAGTGTATGTGGTGAA	1	mml-miR-670-5p	0	0	0	0	0	0	0	0	0	0	0	0	0	0	0	0	0	0	0	0	0	0	0	0	0	0	0	0	0	0
mml-miR-671-3p	TCCGGTTCTCAGGGCTCCACC	1	mml-miR-671-3p	174	174	191	108	76	157	127	171	107	176	213	119	204	290	296	234	222	330	208	136	174	187	173	160	247	248	238	185	175	246
mml-miR-671-5p	AGGAAGCCCTGGAGGGGCTGGAG	1	mml-miR-671-5p	12	14	12	14	7	14	19	29	21	11	11	16	18	12	48	28	37	31	30	18	20	43	24	23	16	31	17	16	25	13
mml-miR-675-3p	CTGTATGCCCTCACCGCTCAGC	1	mml-miR-675-3p	0	0	0	1	0	0	0	0	0	0	0	0	0	1	0	1	1	0	0	0	1	0	0	0	0	0	0	0	0	0
mml-miR-675-5p	TGGTGCGGAGAGGGCCCACAGTG	1	mml-miR-675-5p	0	0	0	0	0	0	0	0	0	0	0	0	0	0	0	0	0	0	0	0	0	0	0	0	0	0	0	0	0	0
mml-miR-676-3p	CCGTCCTAAGGTTGTTGAGTT	1	mml-miR-676-3p	0	0	0	0	0	0	0	0	0	1	0	0	0	0	0	0	0	0	0	0	0	0	0	0	0	0	0	0	0	0
mml-miR-676-5p	CTCTTCAACCTCAGGACTTGCA	1	mml-miR-676-5p	0	0	0	0	0	0	0	0	0	0	0	0	0	0	0	0	0	0	0	0	0	0	0	0	0	0	0	0	0	0
mml-miR-708-3p	CAACTAGACTGTGAGCTTCTAGA	1	mml-miR-708-3p	0	0	0	0	0	0	0	0	0	0	0	0	0	0	0	0	0	0	0	0	0	0	0	0	0	0	0	0	0	0
mml-miR-708-5p	AAGGAGCTTACAATCTAGCTGGG	1	mml-miR-708-5p	0	0	0	0	0	0	0	0	0	0	0	0	0	0	0	0	0	0	0	0	0	0	0	0	0	0	0	0	0	0
mml-miR-711	GGGACCCAGGGAGAGACGTAAG	1	mml-miR-711	0	0	0	0	0	0	0	0	0	0	0	0	0	0	0	0	0	0	0	0	0	0	0	0	0	0	0	0	0	0
mml-miR-758-3p	TTTGTGACCTGGTCCACTACCC	1	mml-miR-758-3p	2	4	5	0	0	4	1	3	0	1	0	1	2	1	1	2	3	1	2	1	1	2	4	1	0	1	1	1	2	0
mml-miR-758-5p	ATGGTTGACCAGAGAGCACACG	1	mml-miR-758-5p	0	0	0	0	0	0	0	0	0	0	0	0	0	0	0	0	0	0	0	0	0	0	0	0	0	0	0	0	0	0
mml-miR-759	GCAGAGTGCAAACAATTTTGAC	1	mml-miR-759	0	0	0	0	0	0	0	0	0	0	0	0	0	0	0	0	0	0	0	0	0	0	0	0	0	0	0	0	0	0
mml-miR-760	CGGCTCTGGGTCTGTGGGGA	1	mml-miR-760	0	1	0	0	1	0	1	0	0	1	0	0	0	0	0	0	0	0	0	1	0	0	0	0	1	1	0	0	0	1
mml-miR-761	GCAGCAGGGTGAAACTGACACA	1	mml-miR-761	0	0	0	0	0	0	0	0	0	0	0	0	0	0	0	0	0	0	0	0	0	0	0	0	0	0	0	0	0	0
mml-miR-762	GGGGCTGGGGCCGGAGCCGAGC	3	mml-miR-762	0	0	0	0	0	0	0	0	0	0	0	0	0	0	0	0	0	0	0	0	0	0	0	0	0	0	0	0	0	0
mml-miR-764	GGTGCTCACTTGTCCTCCT	1	mml-miR-764	0	0	0	0	0	0	0	0	0	0	0	0	0	0	0	0	0	0	0	0	0	0	0	0	0	0	0	0	0	0
mml-miR-765	TGGAGGAGAGGGAAGGTGCTG	1	mml-miR-765	0	0	0	0	0	0	0	0	0	0	0	0	0	0	0	0	0	0	0	0	0	0	0	0	0	0	0	0	0	0
mml-miR-767-3p	TCTGCTCATACCCCATGGTTTCT	1	mml-miR-767-3p	0	0	0	0	0	0	0	0	0	0	0	0	0	0	0	0	0	0	0	0	0	0	0	0	0	0	0	0	0	0
mml-miR-767-5p	TGCACCATGGTTGTCTGAGCATG	1	mml-miR-767-5p	0	0	0	0	0	0	0	0	0	0	0	0	0	0	0	0	0	0	0	0	0	0	0	0	0	0	0	0	0	0
mml-miR-769-3p	TGGGATCTCCGGGGTCTTGGT	1	mml-miR-769-3p	0	0	0	0	0	0	0	0	0	0	0	0	0	0	0	0	0	0	0	0	0	1	0	0	0	0	0	0	0	0
mml-miR-769-5p	TGAGACCTCTGGGTTCTGAGC	1	mml-miR-769-5p	1	3	3	1	1	5	1	4	2	3	3	1	7	2	3	6	9	5	4	2	6	2	4	2	4	4	3	3	4	3
mml-miR-770-5p	TCCAGTACCACGTGTCAGGGCCA	1	mml-miR-770-5p	0	0	0	0	0	0	0	0	0	0	0	0	0	0	0	0	0	0	0	0	0	0	0	0	0	0	0	0	0	0
mml-miR-802	CAGTAACAAAGATTCATCCTTGT	1	mml-miR-802	0	0	0	0	0	0	0	0	0	0	0	0	0	0	0	0	0	0	0	0	0	0	0	0	0	0	0	0	0	0
mml-miR-873-3p	AGACTGATGAGTTCCCGGGA	1	mml-miR-873-3p	0	0	0	0	0	0	0	0	0	0	0	0	0	0	0	0	0	0	0	0	0	0	0	0	0	0	0	0	0	0
mml-miR-873-5p	GCAGGAACTTGTGAGTCTCC	1	mml-miR-873-5p	0	0	0	1	0	0	0	0	0	0	1	0	0	0	1	1	0	0	0	0	0	0	0	0	0	0	0	0	0	0
mml-miR-874-3p	CTGCCCTGGCCCGAGGGACCGA	1	mml-miR-874-3p	0	1	0	0	0	0	2	0	1	2	1	1	1	0	1	0	0	1	2	1	3	0	1	1	0	0	1	1	0	0
mml-miR-874-5p	CGGCCCCACGCACCAGGGTAAGA	1	mml-miR-874-5p	0	0	0	0	0	0	0	0	0	0	0	0	0	0	0	0	0	0	0	0	1	0	0	0	0	0	0	0	0	0
mml-miR-875-3p	CCTGGAAATACTGAGGTTGTG	1	mml-miR-875-3p	0	0	0	0	0	0	0	0	0	0	0	0	0	0	0	0	0	0	0	0	0	0	0	0	0	0	0	0	0	0
mml-miR-875-5p	TATACCTCAGTTTTATCAGGTG	1	mml-miR-875-5p	0	0	0	0	0	0	0	0	0	0	0	0	0	0	0	0	0	0	0	0	0	0	0	0	0	0	0	0	0	0
mml-miR-876-3p	TGGTGGTTTACAAAGTAATTCA	1	mml-miR-876-3p	0	0	0	0	0	0	0	0	0	0	0	0	0	0	0	0	0	0	0	0	0	0	0	0	0	0	0	0	0	0
mml-miR-876-5p	TGGATTTCTTTGTGAATCACCA	1	mml-miR-876-5p	0	0	0	0	0	0	0	0	0	0	0	0	0	0	0	0	0	0	0	0	0	0	0	0	0	0	0	0	0	0
mml-miR-877-3p	CCTCTTCTCCCTCCTCCCA	1	mml-miR-877-3p	6	5	9	6	2	9	5	12	4	8	13	4	13	12	21	12	20	15	11	8	7	14	8	10	22	17	15	9	9	12
mml-miR-877-5p	GTAGAGGAGATGGCGCAGGG	1	mml-miR-877-5p	0	0	0	0	0	0	0	0	0	0	1	0	0	0	0	0	0	0	0	0	0	0	0	0	0	0	0	0	0	0
mml-miR-885-3p	AGGCAGCGGGGTGTAGTGGATA	1	mml-miR-885-3p	0	0	0	0	0	0	0	0	0	0	0	0	0	0	0	0	0	0	0	0	0	0	0	0	0	0	0	0	0	0
mml-miR-885-5p	TCCATTACACTACCCTGCCTCT	1	mml-miR-885-5p	0	0	0	0	0	0	0	0	0	0	0	0	0	0	0	0	0	0	0	0	0	0	0	0	0	0	0	0	0	0
mml-miR-887	GTGAACGGGCGCCATCCCGAGG	1	mml-miR-887	0	0	0	0	0	0	0	0	0	0	0	0	0	0	0	0	0	0	0	0	0	0	0	0	0	0	0	0	0	0
mml-miR-888	TACTCAAAAAGCTGTCAGTCA	1	mml-miR-888	0	0	0	0	0	0	0	0	0	0	0	0	0	0	0	0	0	0	0	0	0	0	0	0	0	0	0	0	0	0
mml-miR-889-3p	TTAATATCGGACAACCATTGT	1	mml-miR-889-3p	2	6	5	3	1	7	1	2	3	1	1	3	1	0	0	2	1	1	2	1	4	1	3	1	0	1	1	1	2	0
mml-miR-889-5p	AATGGCTGTCCGTAGTATGGTC	1	mml-miR-889-5p	0	0	0	0	0	0	0	0	0	0	0	0	0	0	0	0	0	0	0	0	0	0	0	0	0	0	0	0	0	0
mml-miR-890-3p	AACTGTTCCCTTTCTGAGTAGA	1	mml-miR-890-3p	0	0	0	0	0	0	0	0	0	0	0	0	0	0	0	0	0	0	0	0	0	0	0	0	0	0	0	0	0	0
mml-miR-890-5p	TACTTGGAAAGGCACCAGTT	1	mml-miR-890-5p	0	0	0	0	0	0	0	0	0	0	0	0	0	0	0	0	0	0	0	0	0	0	0	0	0	0	0	0	0	0
mml-miR-891a	TGCAACTTACCTGAGTCATTGA	1	mml-miR-891a	0	0	0	0	0	0	0	0	0	0	0	0	0	0	0	0	0	0	0	0	0	0	0	0	0	0	0	0	0	0
mml-miR-891b-3p	AATGGCACATGCTTGTTGTTAG	1	mml-miR-891b-3p	0	0	0	0	0	0	0	0	0	0	0	0	0	0	0	0	0	0	0	0	0	0	0	0	0	0	0	0	0	0
mml-miR-891b-5p	TGCAACGAACTTGAGCCATTGA	1	mml-miR-891b-5p	0	0	0	0	0	0	0	0	0	0	0	0	0	0	0	0	0	0	0	0	0	0	0	0	0	0	0	0	0	0
mml-miR-892a	CACTGTGTCCTTTCTGCGTAG	1	mml-miR-892a	0	0	0	0	0	0	0	0	0	0	0	0	0	0	0	0	0	0	0	0	0	0	0	0	0	0	0	0	0	0
mml-miR-892b	CACTGGCTCCTTTCTGGGTAGA	1	mml-miR-892b	0	0	0	0	0	0	0	0	0	0	0	0	0	0	0	0	0	0	0	0	0	0	0	0	0	0	0	0	0	0
mml-miR-892c-3p	CACTGTTTCCTTTCTGAGTGGA	1	mml-miR-892c-3p	0	0	0	0	0	0	0	0	0	0	0	0	0	0	0	0	0	0	0	0	0	0	0	0	0	0	0	0	0	0
mml-miR-892c-5p	TATTCAGAAAGGTGCCAGTCAC	1	mml-miR-892c-5p	0	0	0	0	0	0	0	0	0	0	0	0	0	0	0	0	0	0	0	0	0	0	0	0	0	0	0	0	0	0
mml-miR-920	GGGGAGCTGTAGAAGCGGTA	1	mml-miR-920	0	0	0	0	0	0	0	0	0	0	0	0	0	0	0	0	0	0	0	0	0	0	0	0	0	0	0	0	0	0
mml-miR-922	GCAGCAGAGAATGAGACTACGTC	1	mml-miR-922	0	0	0	0	0	0	0	0	0	0	0	0	0	0	0	0	0	0	0	0	0	0	0	0	0	0	0	0	0	0
mml-miR-924	AGAGTCTTGTGTTGTCTTGC	1	mml-miR-924	0	0	0	0	0	0	0	0	0	0	0	0	0	0	0	0	0	0	0	0	0	0	0	0	0	0	0	0	0	0
mml-miR-933	TGTGCGCAGGGAGACCTCTCCC	1	mml-miR-933	0	0	0	0	0	0	1	0	1	0	0	1	2	4	3	3	2	4	0	5	0	6	0	2	2	3	2	3	3	2
mml-miR-934-3p	GAGTCTTCGGTAATGGACGGGA	1	mml-miR-934-3p	0	0	0	0	0	0	0	0	0	0	0	0	0	0	0	0	0	0	0	0	0	0	0	0	0	0	0	0	0	0
mml-miR-934-5p	TGTCTACTACTGGAGACACTG	1	mml-miR-934-5p	0	0	0	0	0	0	0	0	0	0	0	0	0	0	0	0	0	0	0	0	0	0	0	0	0	0	0	0	0	0
mml-miR-936	ACAGGAGAGGGAGGAATCGCAG	1	mml-miR-936	0	0	0	0	0	0	0	0	0	0	0	0	0	0	0	0	0	0	0	0	0	0	0	0	0	0	0	0	0	0
mml-miR-937	ATCCGCACTCTGACTCTCCACC	1	mml-miR-937	0	0	1	0	0	0	1	1	1	1	1	0	2	1	1	1	1	1	1	0	0	0	0	0	2	1	2	0	1	0
mml-miR-938	TGCACTTAAAGATGAAGCCGGT	1	mml-miR-938	0	0	0	0	0	0	0	0	0	0	0	0	0	0	0	0	0	0	0	0	0	0	0	0	0	0	0	0	0	0
mml-miR-939	TGGGGAGCTGAGGCTCTGGGGGTG	1	mml-miR-939	0	0	0	0	0	0	0	0	0	0	0	0	0	0	0	0	1	0	0	0	0	1	0	1	0	0	0	0	0	0
mml-miR-940	AAGGCAGGGCCCCCGCTCCCC	1	mml-miR-940	0	0	0	0	0	0	0	2	1	0	1	0	1	0	2	2	2	1	1	0	0	0	1	0	2	2	1	0	0	1
mml-miR-942-3p	CACGTGGCCGAAACAGAGAAGG	1	mml-miR-942-3p	5	1	1	5	4	1	4	5	4	9	7	7	7	7	6	9	7	4	4	5	6	2	2	3	6	9	4	6	7	8
mml-miR-942-5p	CTTCTCTGTTTTGGCCATGTG	1	mml-miR-942-5p	1984	1600	1686	1432	1299	1595	1211	2457	1481	1997	1831	1190	2026	3037	2072	2878	2428	2988	1405	1802	1522	2226	1615	2079	2636	2365	2237	1753	2178	3062
mml-miR-944	AAATTATTGTATATCAGATGAG	1	mml-miR-944	0	0	0	0	0	0	0	0	0	0	0	0	0	0	0	0	0	0	0	0	0	0	0	0	0	0	0	0	0	0
mml-miR-1179	AAGCATTCTTTCATTGGTTGG	1	mml-miR-1179	0	0	0	0	0	0	0	0	0	0	0	0	0	0	0	0	0	0	0	0	0	0	0	0	0	0	0	0	0	0
mml-miR-1180-3p	TTTCCGGCTCGCGTGGGTGTGT	1	mml-miR-1180-3p	382	242	217	263	283	219	415	359	448	482	489	354	319	209	458	389	394	331	493	238	285	391	461	585	500	380	614	194	230	450
mml-miR-1180-5p	GGACCCACCCGGCCGGGAATA	1	mml-miR-1180-5p	0	0	0	0	0	0	0	0	0	0	0	0	0	0	0	0	0	0	0	0	0	0	0	0	0	0	0	0	0	0
mml-miR-1185-3p	TATACAGGGGGAGACTCTTA	2	mml-miR-1185-3p	1	3	2	1	1	2	2	2	1	1	0	2	1	0	0	1	1	1	0	1	2	1	1	1	0	0	0	0	1	0
mml-miR-1185-5p	AGAGGATACCCTTTGTATGTT	2	mml-miR-1185-5p	0	1	0	0	0	2	0	0	0	0	0	0	1	0	0	0	1	0	0	0	1	0	1	0	0	0	0	1	1	0
mml-miR-1224-3p	CCCCACCTCCTCTCTCCTCAG	1	mml-miR-1224-3p	0	0	0	0	0	0	0	0	0	0	0	0	0	0	0	0	0	0	0	0	0	0	0	0	0	0	0	0	0	0
mml-miR-1224-5p	GTGAGGACTCGGGAGGTGG	1	mml-miR-1224-5p	0	0	0	0	0	0	0	0	0	0	0	0	0	0	0	0	0	0	0	0	0	0	0	0	0	0	0	0	0	0
mml-miR-1225-3p	CTGAGCCCCTGTGCCGCCCCCAG	1	mml-miR-1225-3p	0	0	0	0	0	0	0	0	0	0	0	0	0	0	0	0	0	0	0	0	0	0	0	0	0	0	0	0	0	0
mml-miR-1225-5p	GTGGGTACGGCCCAGTGGGGG	1	mml-miR-1225-5p	0	0	0	0	0	0	0	0	0	0	0	0	0	0	0	0	0	0	0	0	0	0	0	0	0	0	0	0	0	0
mml-miR-1226	TCACCAGCCCTGTGTTCCCTAG	1	mml-miR-1226	122	135	199	146	96	200	131	206	82	296	360	112	325	328	316	250	210	267	238	212	216	249	198	201	258	246	252	261	254	290
mml-miR-1227	GTGGGGCCAGGCGGTGGTGG	1	mml-miR-1227	0	0	0	0	0	0	0	0	0	0	0	0	0	0	0	0	0	0	0	0	0	0	0	0	0	0	0	0	0	0
mml-miR-1230	GTGGGTGGGGGCATCTCGGA	1	mml-miR-1230	0	0	0	0	0	0	0	0	0	0	0	0	0	0	0	0	0	0	0	0	0	0	0	0	0	0	0	0	0	0
mml-miR-1232	CTGACCCCGACCACCCCGCAG	1	mml-miR-1232	0	0	0	0	0	0	0	0	0	0	0	0	0	0	0	0	0	0	0	0	0	0	0	0	0	0	0	0	0	0
mml-miR-1233	TGAGCCCTGTCCTCCCGCAG	1	mml-miR-1233	0	0	0	0	0	0	0	0	0	0	0	0	0	0	0	0	0	0	0	0	0	0	0	0	0	0	0	0	0	0
mml-miR-1234	TCGGCCTGACCACCCACCCCAC	1	mml-miR-1234	0	0	0	0	0	0	0	0	0	0	0	0	0	0	0	0	0	0	0	0	0	0	0	0	0	0	0	0	0	0
mml-miR-1235	TCTAACCGCACCGTCCCCCAG	1	mml-miR-1235	2	0	0	1	2	0	0	2	1	5	4	0	7	5	3	6	6	4	6	2	12	1	7	2	10	5	5	2	2	16
mml-miR-1239	TTCCCCATTCTGCCTGGCCTAG	1	mml-miR-1239	0	0	0	0	0	0	0	0	0	0	0	0	0	0	0	0	0	0	0	0	0	0	0	0	0	0	0	0	0	0
mml-miR-1240	TCACCATGACCCTGATCCCACT	1	mml-miR-1240	8	7	12	8	6	8	7	11	4	17	18	6	15	21	20	12	7	14	15	12	13	16	9	7	10	14	16	17	19	12
mml-miR-1241	CTCACCTCTCTGTGCCTTCCAG	1	mml-miR-1241	0	0	0	0	0	0	0	0	0	0	1	0	0	1	1	0	0	1	0	0	0	1	0	0	1	1	0	1	0	1
mml-miR-1243-3p	AAACTGGATCAATTATAGGAG	1	mml-miR-1243-3p	0	0	0	0	0	0	0	0	0	0	0	0	0	0	0	0	0	0	0	0	0	0	0	0	0	0	0	0	0	0
mml-miR-1243-5p	TCCTGTAACTGGGCCAGTTTC	1	mml-miR-1243-5p	0	0	0	0	0	0	0	0	0	0	0	0	0	0	0	0	0	0	0	0	0	0	0	0	0	0	0	0	0	0
mml-miR-1245-3p	GATGAGCTAAAGGCCTATAC	1	mml-miR-1245-3p	0	0	0	0	0	0	0	0	0	0	0	0	0	0	0	0	0	0	0	0	0	0	0	0	0	0	0	0	0	0
mml-miR-1245-5p	GTAGGCCTTTAGATCATCTA	1	mml-miR-1245-5p	0	0	0	0	0	0	0	0	0	0	0	0	0	0	0	0	0	0	0	0	0	0	0	0	0	0	0	0	0	0
mml-miR-1247-3p	CGGGAACGTCGAGACTGGAGC	1	mml-miR-1247-3p	0	0	0	0	0	0	0	0	0	0	0	0	0	0	0	0	0	0	0	0	0	0	0	0	0	0	0	0	0	0
mml-miR-1247-5p	ACCCGTCCCGTTCGTCCCCGGA	1	mml-miR-1247-5p	0	0	0	0	0	0	0	0	0	0	0	0	0	0	0	0	0	0	0	0	0	0	0	0	0	0	0	0	0	0
mml-miR-1249	ACGCCCTTCCCCCCCTTCTTCA	1	mml-miR-1249	56	94	104	32	17	96	26	76	24	86	119	20	229	138	212	194	418	156	106	68	60	93	82	96	242	188	58	29	31	136
mml-miR-1250	ACGGTGCTGAATGTGGCCTT	1	mml-miR-1250	0	0	0	0	0	0	0	0	0	0	0	0	0	0	0	0	0	0	0	0	0	0	0	0	0	0	0	0	0	0
mml-miR-1251-3p	CGCTTTGCTCAGCCAGTGTAG	1	mml-miR-1251-3p	0	0	0	0	0	0	0	0	0	0	0	0	0	0	0	0	0	0	0	0	0	0	0	0	0	0	0	0	0	0
mml-miR-1251-5p	ACTCTAGCTGCCAAAGGCGCT	1	mml-miR-1251-5p	0	0	0	0	0	0	0	0	0	0	0	0	0	0	0	0	0	0	0	0	0	0	0	0	0	0	0	0	0	0
mml-miR-1255a-3p	CTACCTACTTTGCTCATCTTTG	1	mml-miR-1255a-3p	6	8	6	8	3	8	5	6	3	4	5	3	8	7	8	9	6	11	7	10	10	8	7	7	6	6	7	13	14	7
mml-miR-1255a-5p	AGGATGAGCAAAGGAAGTAGT	1	mml-miR-1255a-5p	0	0	1	0	1	0	1	1	1	1	1	2	1	1	0	2	0	1	0	0	1	1	1	1	1	1	0	1	1	2
mml-miR-1255b	TACGGATAAGCAAAGAAAGTGG	1	mml-miR-1255b	3	5	4	4	8	5	6	4	5	4	3	6	6	4	4	5	3	3	6	7	8	4	6	6	2	5	3	7	7	4
mml-miR-1258	AGTTAGGATTAGGTCGTGGAA	1	mml-miR-1258	0	0	0	0	0	0	0	0	0	0	0	0	0	0	0	0	0	0	0	0	0	0	0	0	0	0	0	0	0	0
mml-miR-1260b	ATCCCACCACTGCCACCA	1	mml-miR-1260b	37	31	40	24	12	35	28	54	29	46	49	25	32	47	81	39	45	56	39	27	24	38	36	41	71	59	50	28	30	47
mml-miR-1262-3p	TGATGGGTGAATTTGTAGAAGG	1	mml-miR-1262-3p	6	7	4	9	29	5	3	3	5	10	7	6	6	3	2	4	2	3	10	13	13	4	14	14	14	5	27	23	14	25
mml-miR-1262-5p	TTCTATAAATTCATCCATCACA	1	mml-miR-1262-5p	2	3	1	3	2	4	0	1	1	2	1	0	1	0	0	2	0	1	2	2	2	0	4	1	5	2	4	6	5	9
mml-miR-1271-3p	GTGCCTGCTATGTGCCGGGCA	1	mml-miR-1271-3p	0	0	0	0	0	0	1	0	1	0	0	0	0	0	0	0	0	0	0	0	0	1	0	0	0	0	0	0	0	0
mml-miR-1271-5p	CTTGGCACCTAGCAAGCACTCA	1	mml-miR-1271-5p	102	170	200	65	45	164	131	129	131	85	79	117	155	252	204	265	247	245	71	94	60	120	68	91	101	103	55	51	62	89
mml-miR-1277	TACGTAGATATATATGTATTT	1	mml-miR-1277	0	0	0	0	0	0	0	0	0	0	0	0	0	0	0	0	0	0	0	0	0	0	0	0	0	0	0	0	0	0
mml-miR-1283	CTACAAAGGAAAGCACTTTC	1	mml-miR-1283	0	0	0	0	0	0	0	0	0	0	0	0	0	0	0	0	0	0	0	0	0	0	0	0	0	0	0	0	0	0
mml-miR-1284	TCTGTACAGACCCTGGCTTT	1	mml-miR-1284	1	2	2	1	0	1	0	2	1	2	2	1	1	3	1	3	4	3	2	2	2	1	2	0	3	1	3	1	3	3
mml-miR-1296-3p	GAGTGGGGCTTCGACCCTAACC	1	mml-miR-1296-3p	0	0	0	0	0	0	0	0	0	0	0	0	0	0	0	0	0	0	0	0	0	0	0	0	0	0	0	0	0	0
mml-miR-1296-5p	TTAGGGCCCTGGCTCCATCTCCT	1	mml-miR-1296-5p	63	138	123	33	36	147	86	147	84	211	206	92	153	86	77	162	198	114	138	57	140	54	125	61	142	107	182	111	106	142
mml-miR-1298-3p	CATCTGGGCAACTGACTGAACT	1	mml-miR-1298-3p	0	0	0	0	0	0	0	0	0	0	0	0	0	0	0	0	0	0	0	0	0	0	0	0	0	0	0	0	0	0
mml-miR-1298-5p	TTCATTCGGCTGTCCAGATGTA	1	mml-miR-1298-5p	0	0	0	0	0	0	0	0	0	0	0	0	0	0	0	0	0	0	0	0	0	0	0	0	0	0	0	0	0	0
mml-miR-1304	TTCGAGGCTACAATGAGATGTG	1	mml-miR-1304	42	51	54	52	75	35	63	55	68	54	46	64	19	44	50	24	14	31	28	36	24	38	38	42	17	27	35	50	53	24
mml-miR-1306-3p	ACGTTGGCTCTGGTGGTG	1	mml-miR-1306-3p	0	0	0	1	1	1	0	1	1	1	1	1	1	0	2	1	0	0	1	1	0	1	1	2	2	2	2	0	0	1
mml-miR-1306-5p	CCACCTCCCCTGCAAACGTCC	1	mml-miR-1306-5p	138	156	174	175	103	163	116	140	69	336	405	137	214	284	270	196	180	182	192	192	216	207	119	158	208	198	254	218	205	238
mml-miR-1323-3p	AAAGTGCACCCAGTTTTGGGG	1	mml-miR-1323-3p	0	0	0	0	0	0	0	0	0	0	0	0	0	0	0	0	0	0	0	0	0	0	0	0	0	0	0	0	0	0
mml-miR-1323-5p	TCAAAACTGAGGGGCATTTTC	1	mml-miR-1323-5p	0	0	0	0	0	0	0	0	0	0	0	0	0	0	0	0	0	0	0	0	0	0	0	0	0	0	0	0	0	0
mml-miR-1911-3p	ACCAGGCATTGTGGTCTCTGC	1	mml-miR-1911-3p	0	0	0	0	0	0	0	0	0	0	0	0	0	0	0	0	0	0	0	0	0	0	0	0	0	0	0	0	0	0
mml-miR-1911-5p	TGAGTACCGCCATGTCTGTTGG	1	mml-miR-1911-5p	0	0	0	0	0	0	0	0	0	0	0	0	0	0	0	0	0	0	0	0	0	0	0	0	0	0	0	0	0	0
mml-miR-2114	CGAGCCTCAAGCAAGGGACTTC	1	mml-miR-2114	0	0	0	0	0	0	0	0	0	0	0	0	0	0	0	0	0	0	0	0	0	0	0	0	0	0	0	0	0	0
mml-miR-3059-3p	TCTAGGGAAGAGAAGGTTGGG	1	mml-miR-3059-3p	0	0	0	0	0	0	0	0	0	0	0	0	0	0	0	0	0	0	0	0	0	0	0	0	0	0	0	0	0	0
mml-miR-3059-5p	TTTCCTCTCTGCCCCATAGGGT	1	mml-miR-3059-5p	0	0	0	0	0	0	0	0	0	0	0	0	0	0	0	0	0	0	0	0	0	0	0	0	0	0	0	0	0	0
mml-miR-3122	GTTGGGACAAGAGAACGGTCT	1	mml-miR-3122	11	9	11	11	11	7	18	17	11	10	9	12	14	9	11	16	14	10	12	11	12	17	15	11	6	12	10	10	10	9
mml-miR-3140	AAGAGCTTTTGGGAATTCAGG	1	mml-miR-3140	2	2	2	2	4	1	3	2	4	2	2	2	3	2	4	4	3	3	3	2	3	4	5	5	2	2	3	3	4	1
mml-miR-3145-3p	TATTTTGAGTGTTTGGAATTGA	1	mml-miR-3145-3p	0	0	0	0	0	0	0	0	0	0	0	0	0	0	0	0	0	0	0	0	0	0	0	0	0	0	0	0	0	0
mml-miR-3145-5p	AACTCCAAACATTCAAAACGCA	1	mml-miR-3145-5p	0	0	0	0	0	0	0	0	0	0	0	0	0	0	0	0	0	0	0	0	0	0	0	0	0	0	0	0	0	0
mml-miR-3146	CATGCTAGAACAGAAAGAATGGG	1	mml-miR-3146	1	2	3	2	2	2	0	1	0	2	1	1	1	3	1	4	3	1	4	3	6	1	3	2	2	3	1	1	2	3
mml-miR-3151	ACGGGTGGCGCAATGGGATCAG	1	mml-miR-3151	0	0	0	0	0	0	0	0	0	0	0	0	0	0	0	0	0	0	0	0	0	0	0	0	0	0	0	0	0	0
mml-miR-3154	CAGAAGGGGAGTTGGGAGC	1	mml-miR-3154	0	0	0	0	0	0	0	0	0	0	0	0	0	0	0	0	0	0	0	0	0	0	0	0	0	0	0	0	0	0
mml-miR-3167-3p	AAGGATTTCAGAAATACTGGT	1	mml-miR-3167-3p	0	0	0	0	0	0	0	0	0	0	0	0	0	0	0	0	0	0	0	0	0	0	0	0	0	0	0	0	0	0
mml-miR-3167-5p	CAGTATTTCTGAAATTCTATTTTC	1	mml-miR-3167-5p	0	0	0	0	0	0	0	0	0	0	0	0	0	0	0	0	0	0	0	0	0	0	0	0	0	0	0	0	0	0
mml-miR-3173	GAAGGAGGAAACAGGCAGGCCAG	1	mml-miR-3173	0	0	0	0	0	0	0	0	0	0	0	0	0	0	0	0	0	0	0	0	0	0	0	0	0	0	0	0	0	1
mml-miR-3200-3p	CACCTTGCGCTACTCAGGTCTG	1	mml-miR-3200-3p	82	151	149	95	90	147	120	170	103	190	172	146	236	154	167	197	213	144	167	116	195	110	127	83	203	195	198	165	184	280
mml-miR-3200-5p	GAATCTGAGAAGGCGCACAAGGTTTGTG	1	mml-miR-3200-5p	3	1	3	1	2	2	3	2	4	3	0	2	2	3	3	3	5	1	4	2	3	1	3	3	4	4	4	3	4	4
mml-miR-3577-3p	TCTGTCCCTCTTGGCTGCCAGC	1	mml-miR-3577-3p	0	0	0	0	0	0	0	0	0	0	0	0	0	0	0	0	0	0	0	0	0	0	0	0	0	0	0	0	0	0
mml-miR-3577-5p	TGTGGCAGCCCTGAGAGCCAGGTG	1	mml-miR-3577-5p	0	0	0	0	0	0	0	0	0	0	0	0	0	0	0	0	0	0	0	0	0	0	0	0	0	0	0	0	0	0
mml-miR-3927	CAGGTAGATATTTGATAGGCA	1	mml-miR-3927	0	0	0	0	0	0	0	0	0	0	0	0	0	0	0	0	0	0	0	0	0	0	0	0	0	0	0	0	0	0
mml-miR-3938-3p	AATTCCCTTATGGATAATCTGG	1	mml-miR-3938-3p	0	0	0	0	0	0	0	0	0	0	0	0	0	0	0	0	0	0	0	0	0	0	0	0	0	0	0	0	0	0
mml-miR-3938-5p	AGATTATCTACAAGGGAATTTT	1	mml-miR-3938-5p	0	0	0	0	0	0	0	0	0	0	0	0	0	0	0	0	0	0	0	0	0	0	0	0	0	0	0	0	0	0
mml-miR-4446-3p	CAGGGCTGGCAGTGAGATGGG	1	mml-miR-4446-3p	0	1	1	2	1	1	2	1	2	3	5	2	3	1	2	1	0	0	5	2	4	1	4	2	1	3	2	2	1	1
mml-miR-4446-5p	CCATTTCCCTGCCATTCCCTTGGC	1	mml-miR-4446-5p	2	5	7	1	1	4	2	3	2	4	5	3	3	2	4	2	2	2	5	4	4	5	6	5	3	5	3	2	2	3
mml-miR-4536	TGTGGTAGATATATGCACGA	1	mml-miR-4536	0	0	0	0	0	0	0	0	0	0	0	0	0	0	0	0	0	0	0	0	0	0	0	0	0	0	0	0	0	0
mml-miR-4650	TGGAAGGTAGAATGAGGCCTGAT	1	mml-miR-4650	0	0	0	0	0	0	0	0	0	0	0	0	0	0	0	0	0	0	0	0	0	0	0	0	0	0	0	0	0	0
mml-miR-4667	ACTGGGGAGCAGAAGGAGAAC	1	mml-miR-4667	0	0	0	0	0	0	0	0	0	0	0	1	0	0	0	0	0	0	0	0	0	0	0	0	0	0	0	0	0	0
mml-miR-4677-3p	TCTGTGAGACCAAAGAACTACT	1	mml-miR-4677-3p	2	2	3	2	1	3	1	3	0	2	3	1	3	3	4	2	3	4	2	3	4	3	3	1	1	4	2	5	4	2
mml-miR-4677-5p	TTGTTCTTTGGTCTTTCAGCCA	1	mml-miR-4677-5p	1	1	2	0	0	0	0	1	1	1	0	0	1	2	1	1	1	3	0	1	0	1	1	0	0	1	0	1	1	1
mml-miR-4703-3p	GTAGTTGTACTGTATTGCCACT	1	mml-miR-4703-3p	0	0	0	0	0	0	0	0	0	0	0	0	0	0	0	0	0	0	0	0	0	0	0	0	0	0	0	0	0	0
mml-miR-4703-5p	TGGCAATACAGTACAAATACAG	1	mml-miR-4703-5p	0	0	0	0	0	0	0	0	0	0	0	0	0	0	0	0	0	0	0	0	0	0	0	0	0	0	0	0	0	0
mml-miR-4716	AAGGGGGAAGGACACATGGAGA	1	mml-miR-4716	0	0	0	0	0	0	0	0	0	0	0	0	0	0	0	0	0	0	0	0	0	0	0	0	0	0	0	0	0	0
mml-miR-4743	TGGCCGGATGGGACAGGAGGCA	1	mml-miR-4743	0	0	0	0	0	0	0	0	0	0	0	0	0	0	0	0	0	0	0	0	0	0	0	0	0	0	0	0	0	0
mml-miR-4766-3p	ACAGCAATCGCTCTTTTGGAAG	1	mml-miR-4766-3p	15	20	22	9	6	25	6	22	11	16	13	6	24	18	21	39	40	33	19	19	22	14	20	14	28	32	13	24	36	33
mml-miR-4766-5p	TCTGAAAGAGCAGTTGGTGTTT	1	mml-miR-4766-5p	3	5	4	4	7	3	4	4	4	3	2	4	4	3	4	5	2	2	4	3	3	4	6	5	2	3	2	3	4	2
mml-miR-4796-3p	AAGTGGCAGAGTGTAGACACAA	1	mml-miR-4796-3p	0	1	0	0	1	0	1	1	1	0	0	1	0	0	0	2	0	0	1	0	0	0	1	1	0	1	1	1	0	0
mml-miR-4796-5p	TATACTCTGCCACTTTACT	1	mml-miR-4796-5p	0	0	0	0	0	0	0	0	0	0	0	0	0	0	0	0	0	0	0	0	0	0	0	0	0	0	0	0	0	0
mml-miR-4803	TAACATAATAGTGTGGACTGA	1	mml-miR-4803	0	0	0	0	0	0	0	0	0	0	0	0	0	0	0	0	0	0	0	0	0	0	0	0	0	0	0	0	0	0
mml-miR-5697-3p	CTTTTATCTGAAACTGCTTGA	1	mml-miR-5697-3p	2	2	2	3	2	3	2	2	1	1	1	1	3	3	1	5	3	2	1	2	1	2	2	2	1	1	2	2	3	1
mml-miR-5697-5p	AAGTAGTTTCATGATAAAGGGT	1	mml-miR-5697-5p	0	0	0	0	0	0	0	0	0	0	0	0	0	0	0	0	0	0	0	0	0	0	0	0	0	0	0	0	0	0
mml-miR-6127	TGAGGGAGTGGGTGGGAGG	1	mml-miR-6127	0	0	0	0	0	0	0	0	0	0	0	0	0	0	0	0	0	0	0	0	0	0	0	0	0	0	0	0	0	0
mml-miR-6128	ACTGGAATTGGAGTCAAAA	1	mml-miR-6128	0	0	0	0	0	0	0	0	0	0	0	0	0	0	0	0	0	0	0	0	0	0	0	0	0	0	0	0	0	0
mml-miR-6129	TGAGGGAGTTGAGTGTATA	1	mml-miR-6129	0	0	0	0	0	0	0	0	0	0	0	0	0	0	0	0	0	0	0	0	0	0	0	0	0	0	0	0	0	0
mml-miR-6130	TGAGGGAGTGGATTGTATG	1	mml-miR-6130	0	0	0	0	0	0	0	0	0	0	0	0	0	0	0	0	0	0	0	0	0	0	0	0	0	0	0	0	0	0
mml-miR-6131	GGCTGGTTAGATGGGAGTG	1	mml-miR-6131	0	0	0	0	0	0	0	0	0	0	0	0	0	0	0	0	0	0	0	0	0	0	0	0	0	0	0	0	0	0
mml-miR-6132	AGCAGGGCTGGGGATTGCA	1	mml-miR-6132	0	0	0	0	0	0	0	0	0	0	0	0	0	0	0	0	0	0	0	0	0	0	0	0	0	0	0	0	0	0
mml-miR-6133	TGAGGGAGGAGGTTGGGTA	1	mml-miR-6133	0	0	0	0	0	0	0	0	0	0	0	0	0	0	0	0	0	0	0	0	0	0	0	0	0	0	0	0	0	0
mml-miR-6134	TGAGGTAGTAGGATGTAGA	1	mml-miR-6134	0	0	0	1	1	0	0	0	1	0	0	1	0	0	0	0	0	0	0	1	0	1	0	1	0	0	0	0	0	0
mml-miR-6505-3p	TGACTTCTACCTGTTCCAAAG	1	mml-miR-6505-3p	2	3	3	2	1	1	1	4	1	2	3	0	2	3	3	4	3	5	2	2	2	3	2	2	3	3	2	5	4	4
mml-miR-6505-5p	TTGGAATAGGGGATATCTCAGC	1	mml-miR-6505-5p	0	0	2	1	0	1	0	1	0	1	1	0	1	1	1	1	1	0	1	1	1	1	1	1	0	1	0	1	1	1
mml-miR-6529-3p	CCTGTGCCTTTTACCTCTTTAA	1	mml-miR-6529-3p	16	22	30	15	11	23	13	39	10	25	22	9	37	52	37	38	22	39	21	23	24	24	22	17	27	33	23	32	26	27
mml-miR-6529-5p	GAGAGATCAGAGGCGCAGAGT	1	mml-miR-6529-5p	143	140	209	159	116	137	142	182	138	245	208	168	221	223	266	288	339	224	337	219	302	115	252	271	284	324	275	239	299	327
mml-miR-6790-3p	TCGGCAACTCCTCACTCACCGT	1	mml-miR-6790-3p	8	13	14	10	5	10	11	18	7	14	18	9	22	21	21	27	21	22	17	18	18	18	15	13	17	25	13	18	16	21
mml-miR-6790-5p	AGTGAGTGTGGATTTGGCGGGG	1	mml-miR-6790-5p	0	0	0	0	0	0	0	0	0	0	0	0	0	0	0	0	0	0	0	0	0	0	0	0	0	0	0	0	0	0
mml-miR-6794-3p	TCACTCTCGGTCCCTCCCTA	1	mml-miR-6794-3p	0	0	0	0	0	0	0	0	0	0	0	0	0	0	0	0	0	0	0	0	0	0	0	0	0	0	0	0	0	0
mml-miR-6794-5p	CAGGGGGACTGGGGGTGAGC	1	mml-miR-6794-5p	0	0	0	0	0	0	0	0	0	0	0	0	0	0	0	0	0	0	0	0	0	0	0	0	0	0	0	0	0	0
mml-miR-6827-3p	ACCGTCTCTTCTGTTTCCCAGGATCC	1	mml-miR-6827-3p	11	20	24	8	6	19	10	18	7	13	13	9	16	21	22	13	12	23	16	12	14	23	23	18	14	15	16	17	14	13
mml-miR-6827-5p	GTGGGAACCATAAGGGTCTGTGC	1	mml-miR-6827-5p	0	1	0	0	1	0	1	1	1	1	1	1	0	0	1	0	0	0	1	1	1	1	2	1	0	0	0	1	0	0
mml-miR-7163-3p	GACAGCCCCAAGTTTGAAACCT	1	mml-miR-7163-3p	0	0	0	0	0	0	0	0	0	0	0	0	0	0	0	0	0	0	0	0	0	0	0	0	0	0	0	0	0	0
mml-miR-7163-5p	GTGACAAGCTTGGGCTCTG	1	mml-miR-7163-5p	0	0	0	0	0	0	0	0	0	0	0	0	0	0	0	0	0	0	0	0	0	0	0	0	0	0	0	0	0	0
mml-miR-7164-3p	CCTGTCGCTTCTTTTTCTTCT	1	mml-miR-7164-3p	0	0	0	0	0	0	0	0	0	0	0	0	0	0	0	0	0	0	0	0	0	0	0	0	0	0	0	0	0	0
mml-miR-7164-5p	TAGGAAAAGGAGTGGACAGAGG	1	mml-miR-7164-5p	0	0	0	0	0	0	0	0	0	0	0	0	0	0	0	0	0	0	0	0	0	0	0	0	0	0	0	0	0	0
mml-miR-7165-3p	ACGGCCTGTTTCTCTCCTAG	1	mml-miR-7165-3p	2	3	6	1	0	3	2	6	2	4	4	1	5	2	2	6	5	3	5	3	3	3	3	1	6	6	5	5	4	6
mml-miR-7165-5p	GGGCGGGAATTCAGAGCCAGTCA	1	mml-miR-7165-5p	0	0	0	0	0	0	0	0	0	0	0	0	0	0	0	0	0	0	0	0	0	0	0	0	0	1	0	0	0	0
mml-miR-7166-3p	GTGGAAGGTCTCACCTGTAAGAG	1	mml-miR-7166-3p	0	0	0	0	0	0	0	0	0	0	0	0	0	0	0	0	0	0	0	0	0	0	0	0	0	0	0	0	0	0
mml-miR-7166-5p	TTCTCAGGTGTGACTCCCAGGT	1	mml-miR-7166-5p	0	0	0	0	0	0	0	0	0	0	0	0	0	0	0	0	0	0	0	0	0	0	0	0	0	0	0	0	0	0
mml-miR-7167-3p	CTCGGGCTTAGGGCCTGC	1	mml-miR-7167-3p	0	0	0	0	0	0	0	0	0	0	0	0	0	0	0	0	0	0	0	0	0	0	0	0	0	0	0	0	0	0
mml-miR-7167-5p	AGGCTCGGAGCTCTAGGC	1	mml-miR-7167-5p	0	0	0	0	0	0	0	0	0	0	0	0	0	0	0	0	0	0	0	0	0	0	0	0	0	0	0	0	0	0
mml-miR-7168-3p	AGTGTTTAATCTGTAAAATGGA	1	mml-miR-7168-3p	0	0	0	0	0	0	0	0	0	0	0	0	0	0	0	0	0	0	0	0	0	0	0	0	0	0	0	0	0	0
mml-miR-7168-5p	CATTTTACAGATTAAATAGTGA	1	mml-miR-7168-5p	0	0	0	0	0	0	0	0	0	0	0	0	0	0	0	0	0	0	0	0	0	0	0	0	0	0	0	0	0	0
mml-miR-7169-3p	ATGAGTCCTAGACTGAAGGGA	1	mml-miR-7169-3p	0	0	0	0	0	0	0	0	0	0	0	0	0	0	0	0	0	0	0	0	0	0	0	0	0	0	0	0	0	0
mml-miR-7169-5p	CCTTCAGTCTAGGACTCATTT	1	mml-miR-7169-5p	0	0	0	0	0	0	0	0	0	0	0	0	0	0	0	0	0	0	0	0	0	0	0	0	0	0	0	0	0	0
mml-miR-7170-3p	TGGGGCCCTGGGCAGACCTCC	1	mml-miR-7170-3p	0	0	0	0	0	0	0	0	0	0	0	0	0	0	0	0	0	0	0	0	0	0	0	0	0	0	0	0	0	0
mml-miR-7170-5p	AGGACTGCTGGAGGACCGCAGA	1	mml-miR-7170-5p	0	0	0	0	0	0	0	0	0	0	0	0	0	0	0	0	0	0	0	0	0	0	0	0	0	0	0	0	0	0
mml-miR-7171-3p	TGGTGGCCCTTAGAATCTCTGC	1	mml-miR-7171-3p	0	0	0	0	0	0	0	0	0	0	0	0	0	0	0	0	0	0	0	0	0	0	0	0	0	0	0	0	0	0
mml-miR-7171-5p	CGAGATTCTAGGGGCTACCACG	1	mml-miR-7171-5p	0	0	0	0	0	0	0	0	0	0	0	0	0	0	0	0	0	0	0	0	0	0	0	0	0	0	0	0	0	0
mml-miR-7172-3p	ATAAACCCTCAGAGAGTCACC	1	mml-miR-7172-3p	1	1	1	0	0	0	0	1	0	1	0	0	1	1	0	1	1	0	1	0	3	0	1	0	0	1	1	2	1	1
mml-miR-7172-5p	AGGCCTCTCAGGGTTTCTGG	1	mml-miR-7172-5p	2	2	1	1	1	2	1	2	1	2	1	1	4	2	3	3	6	4	3	2	2	2	3	3	7	5	5	4	4	5
mml-miR-7173-3p	TGGAGAACACCACGGTTCA	1	mml-miR-7173-3p	0	0	0	0	0	0	0	0	0	0	0	0	0	0	0	0	0	0	0	0	0	0	0	0	0	0	0	0	0	0
mml-miR-7173-5p	ATGCTGTGTGTCCTCAAGC	1	mml-miR-7173-5p	0	0	0	0	0	0	0	0	0	0	0	0	0	0	0	0	0	0	0	0	0	0	0	0	0	0	0	0	0	0
mml-miR-7174-3p	AGTCTCGCTCTGTCAGTCAGGC	1	mml-miR-7174-3p	0	0	0	0	0	0	0	0	0	0	0	0	0	0	0	0	0	0	0	0	0	0	0	0	0	0	0	0	0	0
mml-miR-7174-5p	AGGAGTGACAGAGTTAGACTCT	1	mml-miR-7174-5p	0	0	0	0	0	0	0	0	0	0	0	0	0	0	0	0	0	0	0	0	0	0	0	0	0	0	0	0	0	0
mml-miR-7175-3p	TGCAACTATGACTGAGGGACTGG	1	mml-miR-7175-3p	0	0	0	0	0	0	0	0	0	0	0	0	0	0	0	0	0	0	0	0	0	0	0	0	0	0	0	0	0	0
mml-miR-7175-5p	AGGACATGTGGGTTAGGCAGAAGTAGA	1	mml-miR-7175-5p	0	0	0	0	0	0	0	0	0	0	0	0	0	0	0	0	0	0	0	0	0	0	0	0	0	0	0	0	0	0
mml-miR-7176-3p	CAGTTCCTTCCACTCCTGGCCA	1	mml-miR-7176-3p	0	0	0	0	0	0	0	0	0	0	0	0	0	0	0	0	0	0	0	0	0	0	0	0	0	0	0	0	0	0
mml-miR-7176-5p	ACCCGGAGTGGAGGGGACAGGG	1	mml-miR-7176-5p	0	0	0	0	0	0	0	0	0	0	0	0	0	0	0	0	0	0	0	0	0	0	0	0	0	0	0	0	0	0
mml-miR-7177-3p	ATGATCCCCTGGTGCCCTGGAA	1	mml-miR-7177-3p	0	0	0	0	0	0	0	0	0	0	0	0	0	0	0	0	0	0	0	0	0	0	0	0	0	0	0	0	0	0
mml-miR-7177-5p	TCAGGACACCAGAGAACCATAG	1	mml-miR-7177-5p	0	0	0	0	0	0	0	0	0	0	0	0	0	0	0	0	0	0	0	0	0	0	0	0	0	0	0	0	0	0
mml-miR-7178-3p	CTAATTTCTGATGCTCTTCCC	1	mml-miR-7178-3p	0	0	0	0	0	0	0	0	0	0	0	0	0	0	0	0	0	0	0	0	0	0	0	0	0	0	0	0	0	0
mml-miR-7178-5p	TAGGAGCTATCAGAACTTAGTG	1	mml-miR-7178-5p	0	0	0	0	0	0	0	0	0	0	0	0	0	0	0	0	0	0	0	0	0	0	0	0	0	0	0	0	0	0
mml-miR-7179-3p	TCAGGAACTTTGTCACGTATGA	1	mml-miR-7179-3p	0	0	0	0	0	0	0	0	0	0	0	0	0	0	0	0	0	0	0	0	0	0	0	0	0	0	0	0	0	0
mml-miR-7179-5p	ATACGTGACAAAGCTCCTGAAA	1	mml-miR-7179-5p	0	0	0	0	0	0	0	0	0	0	0	0	0	0	0	0	0	0	0	0	0	0	0	0	0	0	0	0	0	0
mml-miR-7180-3p	TGGCCTCTGGGTGTGTACCCT	1	mml-miR-7180-3p	10	15	10	11	9	15	18	25	15	17	17	18	23	16	24	22	20	14	25	21	22	40	21	22	20	24	22	14	16	22
mml-miR-7180-5p	AGTGTACTTCCTGAGGCCTCT	1	mml-miR-7180-5p	56	64	79	30	19	62	45	118	54	65	78	28	74	111	120	148	192	144	91	57	53	78	96	93	209	178	130	78	91	150
mml-miR-7181-3p	AGGAGCCACTCCAGGACTCAGG	1	mml-miR-7181-3p	0	0	0	0	0	0	0	1	0	0	0	0	0	0	0	0	1	0	0	0	0	0	0	0	0	1	0	0	0	0
mml-miR-7181-5p	TGGGTCCTGGCTGGAGATCTCT	1	mml-miR-7181-5p	0	0	0	0	0	0	0	0	0	0	0	0	0	0	0	0	0	0	0	0	0	0	0	0	0	0	0	0	0	0
mml-miR-7182-3p	ATGGATTTTAAAACTGGGATGC	1	mml-miR-7182-3p	0	0	0	0	0	0	0	0	0	0	0	0	0	0	0	0	0	0	0	0	0	0	0	0	0	0	0	0	0	0
mml-miR-7182-5p	ATCGCAGTTTTAGAATCCATGC	1	mml-miR-7182-5p	0	0	0	0	0	0	0	0	0	0	0	0	0	0	0	0	0	0	0	0	0	0	0	0	0	0	0	0	0	0
mml-miR-7183-3p	GCATTTGCATTACCAATACACA	1	mml-miR-7183-3p	0	0	0	0	0	0	0	0	0	0	0	0	0	0	0	0	0	0	0	0	0	0	0	0	0	0	0	0	0	0
mml-miR-7183-5p	TGAATTGGTATTGCAAATGACA	1	mml-miR-7183-5p	0	0	0	0	0	0	0	0	0	0	0	0	0	0	0	0	0	0	0	0	0	0	0	0	0	0	0	0	0	0
mml-miR-7184-3p	TGAGCCTTCTGCTGGACCCGTGA	1	mml-miR-7184-3p	0	0	0	0	1	0	1	1	0	1	1	1	2	0	1	1	2	1	3	0	1	1	1	0	1	2	2	0	0	1
mml-miR-7184-5p	AGGGGCCAGGCCAAATGCTCAGT	1	mml-miR-7184-5p	0	0	0	0	0	0	0	0	0	0	0	0	0	0	0	0	0	0	0	0	0	0	0	0	0	0	0	0	0	0
mml-miR-7185-3p	TCTGCAGATCCTGGTCCTAATA	1	mml-miR-7185-3p	0	0	0	0	0	0	0	0	0	0	0	0	0	0	0	0	0	0	0	0	0	0	0	0	0	0	0	0	0	0
mml-miR-7185-5p	TCAGGATCAGGATCTGCAGAGC	1	mml-miR-7185-5p	0	0	0	0	0	0	0	0	0	0	0	0	0	0	0	0	0	0	0	0	0	0	0	0	0	0	0	0	0	0
mml-miR-7186-3p	TCTTCATGCAGGAACCACATTT	1	mml-miR-7186-3p	56	72	86	56	35	92	34	45	36	37	33	30	85	81	59	104	100	99	68	81	92	58	60	41	47	50	21	57	66	56
mml-miR-7186-5p	CTGTGGTTCCTGTATGAAGACA	1	mml-miR-7186-5p	57	49	44	48	57	44	60	38	83	32	32	68	37	43	45	43	38	45	53	41	50	53	49	54	33	37	36	18	23	31
mml-miR-7187-3p	TATAGGATTATAACGGAGCTGA	1	mml-miR-7187-3p	0	0	0	0	0	0	0	0	0	0	0	0	0	0	0	0	0	0	0	0	0	0	0	0	0	0	0	0	0	0
mml-miR-7187-5p	AGCTCCGTTATAATCTATAGG	1	mml-miR-7187-5p	0	0	0	0	0	0	0	0	0	0	0	0	0	0	0	0	0	0	0	0	0	0	0	0	0	0	0	0	0	0
mml-miR-7188-3p	CTTGCTCTGCGTGGCATCTGTCA	1	mml-miR-7188-3p	0	0	0	0	0	0	0	0	0	0	0	0	0	0	0	0	0	0	0	0	0	0	0	0	0	0	0	0	0	0
mml-miR-7188-5p	ACTGTGGCACACAGGACACGGA	1	mml-miR-7188-5p	0	0	0	0	0	0	0	0	0	0	0	0	0	0	0	0	0	0	0	0	0	0	0	0	0	0	0	0	0	0
mml-miR-7189-3p	CATGTTCTCTCGCAGCTCTGGA	1	mml-miR-7189-3p	1	2	2	1	2	2	1	1	1	1	2	3	1	0	0	1	0	0	1	0	2	0	2	0	0	1	3	1	2	1
mml-miR-7189-5p	CCGTGCTGCCAGAGCGCATGAC	1	mml-miR-7189-5p	0	0	0	0	0	0	0	0	0	0	0	0	0	0	0	0	0	0	0	0	0	0	0	0	0	0	0	0	0	0
mml-miR-7190-3p	GCGCTCTTCGTCGGCGTG	1	mml-miR-7190-3p	0	0	0	0	0	0	0	0	0	0	0	0	0	0	0	0	0	0	0	0	0	0	0	0	0	0	0	0	0	0
mml-miR-7190-5p	CGCTGGCTGGGAGCGTAG	1	mml-miR-7190-5p	0	0	0	0	0	0	0	0	0	0	0	0	0	0	0	0	0	0	0	0	0	0	0	0	0	0	0	0	0	0
mml-miR-7191-3p	GCTCTCAGCCAGGTCTGAGGT	1	mml-miR-7191-3p	0	0	0	0	0	0	0	0	0	0	0	0	0	0	0	0	0	0	0	0	0	0	0	0	0	0	0	0	0	0
mml-miR-7191-5p	TACAGAACCTCTGAGGCAT	1	mml-miR-7191-5p	0	0	0	0	0	0	0	0	0	0	0	0	0	0	0	0	0	0	0	0	0	0	0	0	0	0	0	0	0	0
mml-miR-7192-3p	TTGTTTTTTATTCTGAGTGACA	1	mml-miR-7192-3p	0	0	0	0	0	0	0	0	0	0	0	0	0	0	0	0	0	0	0	0	0	0	0	0	0	0	0	0	0	0
mml-miR-7192-5p	TCACTCAGAATTAAAAAACAATA	1	mml-miR-7192-5p	0	0	0	0	0	0	0	0	0	0	0	0	0	0	0	0	0	0	0	0	0	0	0	0	0	0	0	0	0	0
mml-miR-7193-3p	GCTTTTAGAGCTCAGCATCTT	1	mml-miR-7193-3p	0	0	0	0	0	0	0	0	0	0	0	0	0	0	0	0	0	0	0	0	0	0	0	0	0	0	0	0	0	0
mml-miR-7193-5p	GAGTGCTGGGTTCTGTAGGCCA	1	mml-miR-7193-5p	0	0	0	0	0	0	0	0	0	0	0	0	0	0	0	0	0	0	0	0	0	0	0	0	0	0	0	0	0	0
mml-miR-7194-3p	CTCAGATTCTGGATTCCTACC	1	mml-miR-7194-3p	1	2	4	1	1	4	3	4	1	3	4	1	5	2	5	4	3	4	5	2	6	2	6	1	3	3	3	6	4	4
mml-miR-7194-5p	TTGAAATGCAGAGTCTGATCC	1	mml-miR-7194-5p	0	0	0	0	0	0	0	1	0	1	0	1	0	0	0	1	1	0	2	0	2	0	1	0	0	2	0	1	1	1
mml-miR-7195-3p	TATCCTCCCCTCTCCCCCTGCAG	1	mml-miR-7195-3p	0	0	0	0	0	0	0	0	0	0	0	0	0	2	3	0	1	3	0	0	0	1	0	0	1	1	1	0	1	0
mml-miR-7195-5p	GCAGGGGGAAGGGGATGCTTGC	1	mml-miR-7195-5p	0	0	0	0	0	0	0	0	0	0	0	0	0	0	0	0	0	0	0	0	0	0	0	0	0	0	0	0	0	0
mml-miR-7196-3p	AGCTCGAGTTCAGGGGCTGCAA	1	mml-miR-7196-3p	0	0	0	0	0	0	0	0	0	0	0	0	0	0	0	0	0	0	0	0	0	0	0	0	0	0	0	0	0	0
mml-miR-7196-5p	TCCATCCCTGAACTCGAGCTGA	1	mml-miR-7196-5p	0	0	0	0	0	0	0	0	0	0	0	0	0	0	0	0	0	0	0	0	0	0	0	0	0	0	0	0	0	0
mml-miR-7197-3p	TGGGAGAGTTGGATTGGAC	1	mml-miR-7197-3p	0	0	0	0	0	0	0	0	0	0	0	0	0	0	0	0	0	0	0	0	0	0	0	0	0	0	0	0	0	0
mml-miR-7197-5p	CCACGGATCTGGCCAGCCACC	1	mml-miR-7197-5p	0	0	0	0	0	0	0	0	0	0	0	0	0	0	0	0	0	0	0	0	0	0	0	0	0	0	0	0	0	0
mml-miR-7198-3p	TCAACAGCTGGGTTCCTGAATG	1	mml-miR-7198-3p	0	0	0	0	0	0	0	0	0	0	0	0	0	0	0	0	0	0	0	0	0	0	0	0	0	0	0	0	0	0
mml-miR-7198-5p	TTCAGGAACCCAGGTGGGTTGGGG	1	mml-miR-7198-5p	0	0	0	0	0	0	0	0	0	0	0	0	0	0	0	0	0	0	0	0	0	0	0	0	0	0	0	0	0	0
mml-miR-7199-3p	TTCAGGTTTTGAACATAGAGGT	1	mml-miR-7199-3p	0	0	0	0	0	0	0	0	0	0	0	0	0	0	0	0	0	0	0	0	0	0	0	0	0	0	0	0	0	0
mml-miR-7199-5p	CAATATGTTCAAAACTGAAAG	1	mml-miR-7199-5p	0	0	0	0	0	0	0	0	0	0	0	0	0	0	0	0	0	0	0	0	0	0	0	0	0	0	0	0	0	0
mml-miR-7200-3p	CCTGCAGCCCTGCCTGGGGTGTG	1	mml-miR-7200-3p	0	0	0	0	0	0	0	0	0	0	0	0	0	0	0	0	0	0	0	0	0	0	0	0	0	0	0	0	0	0
mml-miR-7200-5p	TCCCCCAGTCTGGCCACAGAGC	1	mml-miR-7200-5p	0	0	0	0	0	0	0	0	0	0	0	0	0	0	0	0	0	0	0	0	0	0	0	0	0	0	0	0	0	0
mml-miR-7201-3p	TTTCTACCACAGCTCTTTGCTT	1	mml-miR-7201-3p	0	0	0	0	0	0	0	0	0	0	0	0	0	0	0	0	0	0	0	0	0	0	0	0	0	0	0	0	0	0
mml-miR-7201-5p	ACAAAGAGCTGTGGTAGAAAGT	1	mml-miR-7201-5p	0	0	0	0	0	0	0	0	0	0	0	0	0	0	0	0	0	0	0	0	0	0	0	0	0	0	0	0	0	0
mml-miR-7202-3p	ATTTACACGTGTCGCTCGGGA	1	mml-miR-7202-3p	0	0	0	0	0	0	0	0	0	0	0	0	0	0	0	0	0	0	0	0	0	0	0	0	0	0	0	0	0	0
mml-miR-7202-5p	TTGGGTGACATTTGTAGATGT	1	mml-miR-7202-5p	0	0	0	0	0	0	0	0	0	0	0	0	0	0	0	0	0	0	0	0	0	0	0	0	0	0	0	0	0	0
mml-miR-7203-3p	CCGGGACTAGTCTGCCCAGG	1	mml-miR-7203-3p	0	0	0	0	0	0	0	0	0	0	0	0	0	0	0	0	0	0	0	0	0	0	0	0	0	0	0	0	0	0
mml-miR-7203-5p	AGGGTGGACTGTCTCAGAGTGGT	1	mml-miR-7203-5p	0	0	0	0	0	0	0	0	0	0	0	0	0	0	0	0	0	0	0	0	0	0	0	0	0	0	0	0	0	0
mml-miR-7204-3p	CGATAACACCCAAGTCCGAAT	1	mml-miR-7204-3p	46	60	82	40	57	63	33	96	38	59	60	29	58	78	100	88	73	90	64	44	51	56	55	43	66	94	54	69	63	63
mml-miR-7204-5p	TTGGACTTTGGTGCTACCATA	1	mml-miR-7204-5p	0	0	0	0	0	0	0	0	0	0	0	0	0	0	1	0	0	0	0	0	0	0	0	0	0	0	0	0	0	0
mml-miR-7205-3p	TCTCTGACACACGCCCTCCTGC	1	mml-miR-7205-3p	34	38	45	27	19	39	24	23	17	40	45	19	47	48	60	59	47	56	40	33	26	45	35	52	11	9	97	65	77	11
mml-miR-7205-5p	TCGAGGGGCGTCGGGGCCAGGGAAG	1	mml-miR-7205-5p	0	0	0	0	0	0	0	0	0	0	0	0	0	0	0	0	0	0	0	0	0	0	0	0	0	0	0	0	0	0
mml-miR-7206-3p	TAGGATATTTTCAACTCATGAT	1	mml-miR-7206-3p	0	0	0	0	0	0	0	0	0	0	0	0	0	0	0	0	0	0	0	0	1	0	0	0	0	0	0	0	0	0
mml-miR-7206-5p	CGTGAGTTGAAAATATCCTAAG	1	mml-miR-7206-5p	0	0	0	0	0	0	0	0	0	0	0	0	0	0	0	0	0	0	0	0	0	0	0	0	0	0	0	0	0	0
mml-miR-7207-3p	CTCTGTATTTTAAAGGATGC	1	mml-miR-7207-3p	0	0	0	0	0	0	0	0	0	0	0	0	0	0	0	0	0	0	0	0	0	0	0	0	0	0	0	0	0	0
mml-miR-7207-5p	ATCTTTTAAAATACAGAGGG	1	mml-miR-7207-5p	0	0	0	0	0	0	0	0	0	0	0	0	0	0	0	0	0	0	0	0	0	0	0	0	0	0	0	0	0	0
mml-miR-7208-3p	AGCAAAGCAAAGCTCAGTTGG	1	mml-miR-7208-3p	0	0	0	0	0	0	0	0	0	0	0	0	0	0	0	0	0	0	0	0	0	0	0	0	0	0	0	0	0	0
mml-miR-7208-5p	AACTGAGCCTTGCTTTGCTTT	1	mml-miR-7208-5p	0	0	0	0	0	0	0	0	0	0	0	0	0	0	0	0	0	0	0	0	0	0	0	0	0	0	0	0	0	0
Number of mirna with average tpm >=1 :	325
Number of mirna with average tpm >=10 :	215

## Sheet: B. small RNA TPM
smallrna_tpm
Type	Name	Chr	Start	Stop	Strand	1	2	3	4	5	6	7	8	9	10	11	12	13	14	15	16	17	18	19	20	21	22	23	24	25	26	27	28	29	30
tRNA	chrM.trna1-LeuTAA	M	3181	3259	+	0	0	0	0	0	0	0	0	0	0	0	0	0	0	0	0	0	0	0	0	0	0	0	0	0	0	0	0	0	0
tRNA	chrM.trna4-AsnGTT	M	5606	5679	-	0	0	0	0	0	0	0	0	0	0	0	0	0	0	0	0	0	0	0	0	0	0	0	0	0	0	0	0	0	0
tRNA	chrM.trna3-TyrGTA	M	5779	5845	-	0	0	0	0	0	0	0	0	0	0	0	0	0	0	0	0	0	0	0	0	0	0	0	0	0	0	0	0	0	0
tRNA	chrM.trna2-SerTGA	M	7390	7459	-	0	0	0	0	0	0	0	0	0	0	0	0	0	0	0	0	0	0	0	0	0	0	0	0	0	0	0	0	0	0
snoRNA	ENSMMUG00000033085	X	1175112	1175245	-	0	0	0	0	0	0	0	0	0	0	0	0	0	0	0	0	0	0	0	0	0	0	0	0	0	0	0	0	0	0
snRNA	ENSMMUG00000026513	X	1212087	1212191	+	0	0	0	0	0	0	0	0	0	0	0	0	0	0	0	0	0	0	0	0	0	0	0	0	0	0	0	0	0	0
snRNA	ENSMMUG00000034697	X	1245943	1246050	-	0	0	0	0	0	0	0	0	0	0	0	0	0	0	0	0	0	0	0	0	0	0	0	0	0	0	0	0	0	0
tRNA	tRNA-Ile-GAT-5-1	X	1417331	1417405	-	0	0	0	0	0	0	0	0	0	0	0	0	0	0	0	0	0	0	0	0	0	0	0	0	0	0	0	0	0	0
tRNA	tRNA-Ile-GAT-4-1	X	1417736	1417810	-	0	0	0	0	0	0	0	0	0	0	0	0	0	0	0	0	0	0	0	0	0	0	0	0	0	0	0	0	0	0
tRNA	tRNA-Ile-GAT-6-1	X	1418143	1418217	-	0	0	0	0	0	0	0	0	0	0	0	0	0	0	0	0	0	0	0	0	0	0	0	0	0	0	0	0	0	0
tRNA	tRNA-Ile-GAT-1-1	X	1422591	1422665	-	0	0	0	0	0	0	0	0	0	0	0	0	0	0	0	0	0	0	0	0	0	0	0	0	0	0	0	0	0	0
tRNA	tRNA-Ile-GAT-3-1	X	1422994	1423068	-	0	0	0	0	0	0	0	0	0	0	0	0	0	0	0	0	0	0	0	0	0	0	0	0	0	0	0	0	0	0
tRNA	tRNA-Ile-GAT-2-1	X	1423393	1423467	-	0	0	0	0	0	0	0	0	0	0	0	0	0	0	0	0	0	0	0	0	0	0	0	0	0	0	0	0	0	0
snoRNA	ENSMMUG00000024754	X	3049826	3049956	+	0	0	0	0	0	0	0	0	0	0	0	0	0	0	0	0	0	0	0	0	0	0	0	0	0	0	0	0	0	0
snRNA	ENSMMUG00000026283	X	8226738	8226840	+	0	0	0	0	0	0	0	0	0	0	0	0	0	0	0	0	0	0	0	0	0	0	0	0	0	0	0	0	0	0
snRNA	ENSMMUG00000027728	X	9714166	9714272	-	0	0	0	0	0	0	0	0	0	0	0	0	0	0	0	0	0	0	0	0	0	0	0	0	0	0	0	0	0	0
snoRNA	ENSMMUG00000024400	X	13474883	13475022	+	0	0	0	0	0	0	0	0	0	0	0	0	0	0	0	0	0	0	0	0	0	0	0	0	0	0	0	0	0	0
snoRNA	ENSMMUG00000036587	X	13557092	13557184	-	0	0	0	0	0	0	0	0	0	0	0	0	0	0	0	0	0	0	0	0	0	0	0	0	0	0	0	0	0	0
snRNA	ENSMMUG00000026268	X	13676154	13676268	-	0	0	0	0	0	0	0	0	0	0	0	0	0	0	0	0	0	0	0	0	0	0	0	0	0	0	0	0	0	0
snRNA	ENSMMUG00000034768	X	14551495	14551616	-	0	0	0	0	0	0	0	0	0	0	0	0	0	0	0	0	0	0	0	0	0	0	0	0	0	0	0	0	0	0
snoRNA	ENSMMUG00000024805	X	14722471	14722602	-	0	0	0	0	0	0	0	0	0	0	0	0	0	0	0	0	0	0	0	0	0	0	0	0	0	0	0	0	0	0
snoRNA	ENSMMUG00000035486	X	15074375	15074478	+	0	0	0	0	0	0	0	0	0	0	0	0	0	0	0	0	0	0	0	0	0	0	0	0	0	0	0	0	0	0
snoRNA	ENSMMUG00000028083	X	17884874	17884943	-	0	0	0	0	0	0	0	0	0	0	0	0	0	0	0	0	0	0	0	0	0	0	0	0	0	0	0	0	0	0
snoRNA	ENSMMUG00000028360	X	17885097	17885176	-	0	0	0	0	0	0	0	0	0	0	0	0	0	0	0	0	0	0	0	0	1	0	0	0	0	0	0	0	0	0
tRNA	tRNA-Leu-TAA-14-1	X	18502214	18502286	+	0	0	0	0	0	0	0	0	0	0	0	0	0	0	0	0	0	0	0	0	0	0	0	0	0	0	0	0	0	0
snRNA	ENSMMUG00000027578	X	18957307	18957413	+	0	0	0	0	0	0	0	0	0	0	0	0	0	0	0	0	0	0	0	0	0	0	0	0	0	0	0	0	0	0
snRNA	ENSMMUG00000027401	X	20303610	20303716	+	0	0	0	0	0	0	0	0	0	0	0	0	0	0	0	0	0	0	0	0	0	0	0	0	0	0	0	0	0	0
snoRNA	ENSMMUG00000037165	X	21313755	21313857	-	0	0	0	0	0	0	0	0	0	0	0	0	0	0	0	0	0	0	0	0	0	0	0	0	0	0	0	0	0	0
snRNA	ENSMMUG00000035953	X	21942879	21942989	-	0	0	0	0	0	0	0	0	0	0	0	0	0	0	0	0	0	0	0	0	0	0	0	0	0	0	0	0	0	0
snoRNA	ENSMMUG00000024803	X	21954603	21954735	+	0	0	0	0	0	0	0	0	0	0	0	0	0	0	0	0	0	0	0	0	0	0	0	0	0	0	0	0	0	0
snoRNA	ENSMMUG00000035597	X	22092368	22092472	-	0	0	0	0	0	0	0	0	0	0	0	0	0	0	0	0	0	0	0	0	0	0	0	0	0	0	0	0	0	0
snoRNA	ENSMMUG00000036398	X	22570298	22570427	+	0	0	0	0	0	0	0	0	0	0	0	0	0	0	0	0	0	0	0	0	0	0	0	0	0	0	0	0	0	0
snRNA	ENSMMUG00000035762	X	24645701	24645842	+	0	0	0	0	0	0	0	0	0	0	0	0	0	0	0	0	0	0	0	0	0	0	0	0	0	0	0	0	0	0
snoRNA	ENSMMUG00000026192	X	26786085	26786154	+	0	0	0	0	0	0	0	0	0	0	0	0	0	0	0	0	0	0	0	0	0	0	0	0	0	0	0	0	0	0
snRNA	ENSMMUG00000034238	X	27621930	27622023	+	0	0	0	0	0	0	0	0	0	0	0	0	0	0	0	0	0	0	0	0	0	0	0	0	0	0	0	0	0	0
snRNA	ENSMMUG00000037102	X	29233321	29233426	+	0	0	0	0	0	0	0	0	0	0	0	0	0	0	0	0	0	0	0	0	0	0	0	0	0	0	0	0	0	0
snoRNA	ENSMMUG00000037062	X	30753905	30754003	-	0	0	0	0	0	0	0	0	0	0	0	0	0	0	0	0	0	0	0	0	0	0	0	0	0	0	0	0	0	0
snRNA	ENSMMUG00000036832	X	33618669	33618772	+	0	0	0	0	0	0	0	0	0	0	0	0	0	0	0	0	0	0	0	0	0	0	0	0	0	0	0	0	0	0
snRNA	ENSMMUG00000035513	X	36337716	36337777	+	0	0	0	0	0	0	0	0	0	0	0	0	0	0	0	0	0	0	0	0	0	0	0	0	0	0	0	0	0	0
snRNA	ENSMMUG00000028388	X	36819961	36820067	-	0	0	0	0	0	0	0	0	0	0	0	0	0	0	0	0	0	0	0	0	0	0	0	0	0	0	0	0	0	0
snoRNA	ENSMMUG00000037290	X	38028371	38028474	+	0	0	0	0	0	0	0	0	0	0	0	0	0	0	0	0	0	0	0	0	0	0	0	0	0	0	0	0	0	0
snRNA	ENSMMUG00000037377	X	38280323	38280384	-	0	0	0	0	0	0	0	0	0	0	0	0	0	0	0	0	0	0	0	0	0	0	0	0	0	0	0	0	0	0
snRNA	ENSMMUG00000027331	X	38805222	38805328	-	0	0	0	0	0	0	0	0	0	0	0	0	0	0	0	0	0	0	0	0	0	0	0	0	0	0	0	0	0	0
snRNA	ENSMMUG00000036722	X	39359202	39359308	-	0	0	0	0	0	0	0	0	0	0	0	0	0	0	0	0	0	0	0	0	0	0	0	0	0	0	0	0	0	0
snRNA	ENSMMUG00000036125	X	39391143	39391236	-	0	0	0	0	0	0	0	0	0	0	0	0	0	0	0	0	0	0	0	0	0	0	0	0	0	0	0	0	0	0
snRNA	ENSMMUG00000036424	X	39706514	39706609	-	0	0	0	0	0	0	0	0	0	0	0	0	0	0	0	0	0	0	0	0	0	0	0	0	0	0	0	0	0	0
snRNA	ENSMMUG00000033086	X	39934783	39934889	-	0	0	0	0	0	0	0	0	0	0	0	0	0	0	0	0	0	0	0	0	0	0	0	0	0	0	0	0	0	0
snRNA	ENSMMUG00000028075	X	39962420	39962526	-	0	0	0	0	0	0	0	0	0	0	0	0	0	0	0	0	0	0	0	0	0	0	0	0	0	0	0	0	0	0
snRNA	ENSMMUG00000024948	X	40114823	40114927	+	0	0	0	0	0	0	0	0	0	0	0	0	0	0	0	0	0	0	0	0	0	0	0	0	0	0	0	0	0	0
snRNA	ENSMMUG00000036206	X	42624923	42624983	+	0	0	0	0	0	0	0	0	0	0	0	0	0	0	0	0	0	0	0	0	0	0	0	0	0	0	0	0	0	0
snRNA	ENSMMUG00000026370	X	44353269	44353371	+	0	0	0	0	0	0	0	0	0	0	0	0	0	0	0	0	0	0	0	0	0	0	0	0	0	0	0	0	0	0
snRNA	ENSMMUG00000028063	X	44921147	44921253	+	0	0	0	0	0	0	0	0	0	0	0	0	0	0	0	0	0	0	0	0	0	0	0	0	0	0	0	0	0	0
snRNA	ENSMMUG00000025425	X	44962263	44962411	+	0	0	0	0	0	0	0	0	0	0	0	0	0	0	0	0	0	0	0	0	0	0	0	0	0	0	0	0	0	0
snoRNA	ENSMMUG00000035873	X	45107787	45107890	+	0	0	0	0	0	0	0	0	0	0	0	0	0	0	0	0	0	0	0	0	0	0	0	0	0	0	0	0	0	0
snRNA	ENSMMUG00000035367	X	45169887	45169989	-	0	0	0	0	0	0	0	0	0	0	0	0	0	0	0	0	0	0	0	0	0	0	0	0	0	0	0	0	0	0
snoRNA	ENSMMUG00000034053	X	45207955	45208083	+	0	0	0	0	0	0	0	0	0	0	0	0	0	0	0	0	0	0	0	0	0	0	0	0	0	0	0	0	0	0
snoRNA	ENSMMUG00000035901	X	45898619	45898722	+	0	0	0	0	0	0	0	0	0	0	0	0	0	0	0	0	0	0	0	0	0	0	0	0	0	0	0	0	0	0
snoRNA	ENSMMUG00000035764	X	46412882	46412983	-	0	0	0	0	0	0	0	0	0	0	0	0	0	0	0	0	0	0	0	0	0	0	0	0	0	0	0	0	0	0
snRNA	ENSMMUG00000027735	X	46586958	46587064	-	0	0	0	0	0	0	0	0	0	0	0	0	0	0	0	0	0	0	0	0	0	0	0	0	0	0	0	0	0	0
snRNA	ENSMMUG00000026347	X	46816633	46816739	-	0	0	0	0	0	0	0	0	0	0	0	0	0	0	0	0	0	0	0	0	0	0	0	0	0	0	0	0	0	0
snRNA	ENSMMUG00000025295	X	47580664	47580770	-	0	0	0	0	0	0	0	0	0	0	0	0	0	0	0	0	0	0	0	0	0	0	0	0	0	0	0	0	0	0
snRNA	ENSMMUG00000025261	X	48272063	48272163	+	0	0	0	0	0	0	0	0	0	0	0	0	0	0	0	0	0	0	0	0	0	0	0	0	0	0	0	0	0	0
snoRNA	ENSMMUG00000032852	X	49062859	49062921	+	0	0	0	0	0	0	0	0	0	0	0	0	0	0	0	0	0	0	0	0	0	0	0	0	0	0	0	0	0	0
snRNA	ENSMMUG00000036175	X	49546124	49546229	-	0	0	0	0	0	0	0	0	0	0	0	0	0	0	0	0	0	0	0	0	0	0	0	0	0	0	0	0	0	0
snoRNA	ENSMMUG00000033969	X	49982993	49983120	+	0	0	0	0	0	0	0	0	0	0	0	0	0	0	0	0	0	0	0	0	0	0	0	0	0	0	0	0	0	0
snRNA	ENSMMUG00000037331	X	51452509	51452569	+	0	0	0	0	0	0	0	0	0	0	0	0	0	0	0	0	0	0	0	0	0	0	0	0	0	0	0	0	0	0
snoRNA	ENSMMUG00000036701	X	52377544	52377665	-	0	0	0	0	0	0	0	0	0	0	0	0	0	0	0	0	0	0	0	0	0	0	0	0	0	0	0	0	0	0
snoRNA	ENSMMUG00000033572	X	53137070	53137197	+	0	0	0	0	0	0	0	0	0	0	0	0	0	0	0	0	0	0	0	0	0	0	0	0	0	0	0	0	0	0
snoRNA	ENSMMUG00000033713	X	53254088	53254216	+	0	0	0	0	0	0	0	0	0	0	0	0	0	0	0	0	0	0	0	0	0	0	0	0	0	0	0	0	0	0
tRNA	tRNA-Ser-TGA-7-1	X	62638804	62638873	+	0	0	0	0	0	0	0	0	0	0	0	0	0	0	0	0	0	0	0	0	0	0	0	0	0	0	0	0	0	0
snRNA	ENSMMUG00000036420	X	65561763	65561869	-	0	0	0	0	0	0	0	0	0	0	0	0	0	0	0	0	0	0	0	0	0	0	0	0	0	0	0	0	0	0
snRNA	ENSMMUG00000033037	X	67502022	67502128	-	0	0	0	0	0	0	0	0	0	0	0	0	0	0	0	0	0	0	0	0	0	0	0	0	0	0	0	0	0	0
snoRNA	ENSMMUG00000033096	X	68641905	68642101	+	0	0	0	0	0	0	0	0	0	0	0	0	0	0	0	0	0	0	0	0	0	0	0	0	0	0	0	0	0	0
snRNA	ENSMMUG00000026682	X	69424277	69424438	+	0	0	0	0	0	0	0	0	0	0	0	0	0	0	0	0	0	0	0	0	0	0	0	0	0	0	0	0	0	0
snRNA	ENSMMUG00000033267	X	69927566	69927729	-	0	0	0	0	0	0	0	0	0	0	0	0	0	0	0	0	0	0	0	0	0	0	0	0	0	0	0	0	0	0
snoRNA	ENSMMUG00000037111	X	70341449	70341559	-	0	0	0	0	0	0	0	0	0	0	0	0	0	0	0	0	0	0	0	0	0	0	0	0	0	0	0	0	0	0
snRNA	ENSMMUG00000025804	X	70886128	70886230	-	0	0	0	0	0	0	0	0	0	0	0	0	0	0	0	0	0	0	0	0	0	0	0	0	0	0	0	0	0	0
snRNA	ENSMMUG00000034936	X	71303390	71303580	-	0	0	0	0	0	0	0	0	1	0	0	0	0	0	0	0	0	0	0	0	0	0	0	0	1	0	0	0	2	0
snRNA	ENSMMUG00000028080	X	73780483	73780589	+	0	0	0	0	0	0	0	0	0	0	0	0	0	0	0	0	0	0	0	0	0	0	0	0	0	0	0	0	0	0
snRNA	ENSMMUG00000034717	X	74099592	74099723	-	0	0	0	0	0	0	0	0	0	0	0	0	0	0	0	0	0	0	0	0	0	0	0	0	0	0	0	0	0	0
snRNA	ENSMMUG00000027631	X	75085779	75085885	+	0	0	0	0	0	0	0	0	0	0	0	0	0	0	0	0	0	0	0	0	0	0	0	0	0	0	0	0	0	0
snRNA	ENSMMUG00000027544	X	76517317	76517419	+	0	0	0	0	0	0	0	0	0	0	0	0	0	0	0	0	0	0	0	0	0	0	0	0	0	0	0	0	0	0
snRNA	ENSMMUG00000027787	X	78831539	78831645	-	0	0	0	0	0	0	0	0	0	0	0	0	0	0	0	0	0	0	0	0	0	0	0	0	0	0	0	0	0	0
snoRNA	ENSMMUG00000037445	X	79588382	79588508	-	0	0	0	0	0	0	0	0	0	0	0	0	0	0	0	0	0	0	0	0	0	0	0	0	0	0	0	0	0	0
snRNA	ENSMMUG00000027947	X	79619814	79619920	+	0	0	0	0	0	0	0	0	0	0	0	0	0	0	0	0	0	0	0	0	0	0	0	0	0	0	0	0	0	0
snRNA	ENSMMUG00000036160	X	79671935	79672043	+	0	0	0	0	0	0	0	0	0	0	0	0	0	0	0	0	0	0	0	0	0	0	0	0	0	0	0	0	0	0
snRNA	ENSMMUG00000032779	X	80718265	80718369	-	0	0	0	0	0	0	0	0	0	0	0	0	0	0	0	0	0	0	0	0	0	0	0	0	0	0	0	0	0	0
snoRNA	ENSMMUG00000036929	X	86885256	86885382	+	0	0	0	0	0	0	0	0	0	0	0	0	0	0	0	0	0	0	0	0	0	0	0	0	0	0	0	0	0	0
snRNA	ENSMMUG00000026363	X	89393627	89393732	-	0	0	0	0	0	0	0	0	0	0	0	0	0	0	0	0	0	0	0	0	0	0	0	0	0	0	0	0	0	0
snRNA	ENSMMUG00000034680	X	90553032	90553222	+	1	0	1	0	0	1	1	1	0	0	0	0	0	1	1	1	0	1	0	1	1	1	1	1	1	2	0	2	3	1
tRNA	tRNA-Val-CAC-7-1	X	90583287	90583355	+	0	0	0	0	0	0	0	0	0	0	0	0	0	0	0	0	0	0	0	0	0	0	0	0	0	0	0	0	0	0
snRNA	ENSMMUG00000032968	X	92694243	92694350	-	0	0	0	0	0	0	0	0	0	0	0	0	0	0	0	0	0	0	0	0	0	0	0	0	0	0	0	0	0	0
snRNA	ENSMMUG00000026472	X	93137414	93137518	+	0	0	0	0	0	0	0	0	0	0	0	0	0	0	0	0	0	0	0	0	0	0	0	0	0	0	0	0	0	0
snoRNA	ENSMMUG00000033307	X	98725785	98725912	-	0	0	0	0	0	0	0	0	0	0	0	0	0	0	0	0	0	0	0	0	0	0	0	0	0	0	0	0	0	0
snoRNA	ENSMMUG00000025180	X	99533649	99533781	-	0	0	0	0	0	0	0	0	0	0	0	0	0	0	0	0	0	0	0	0	0	0	0	0	0	0	0	0	0	0
snRNA	ENSMMUG00000028418	X	100041305	100041411	+	0	0	0	0	0	0	0	0	0	0	0	0	0	0	0	0	0	0	0	0	0	0	0	0	0	0	0	0	0	0
snRNA	ENSMMUG00000025347	X	100336603	100336709	-	0	0	0	0	0	0	0	0	0	0	0	0	0	0	0	0	0	0	0	0	0	0	0	0	0	0	0	0	0	0
snRNA	ENSMMUG00000028306	X	100394089	100394195	+	0	0	0	0	0	0	0	0	0	0	0	0	0	0	0	0	0	0	0	0	0	0	0	0	0	0	0	0	0	0
snRNA	ENSMMUG00000027416	X	101294690	101294796	-	0	0	0	0	0	0	0	0	0	0	0	0	0	0	0	0	0	0	0	0	0	0	0	0	0	0	0	0	0	0
snRNA	ENSMMUG00000027389	X	104385458	104385564	-	0	0	0	0	0	0	0	0	0	0	0	0	0	0	0	0	0	0	0	0	0	0	0	0	0	0	0	0	0	0
snRNA	ENSMMUG00000025929	X	107569490	107569594	+	0	0	0	0	0	0	0	0	0	0	0	0	0	0	0	0	0	0	0	0	0	0	0	0	0	0	0	0	0	0
snoRNA	ENSMMUG00000033084	X	108943862	108943937	-	0	0	0	0	0	0	0	0	0	0	0	0	0	0	0	0	0	0	0	0	0	0	0	0	0	0	0	0	0	0
snRNA	ENSMMUG00000037151	X	110105768	110105865	-	0	0	0	0	0	0	0	0	0	0	0	0	0	0	0	0	0	0	0	0	0	0	0	0	0	0	0	0	0	0
snoRNA	ENSMMUG00000037293	X	111675324	111675433	-	0	0	0	0	0	0	0	0	0	0	0	0	0	0	0	0	0	0	0	0	0	0	0	0	0	0	0	0	0	0
snoRNA	ENSMMUG00000024877	X	112561998	112562212	-	0	0	0	0	0	0	0	0	0	0	0	0	0	0	0	0	0	0	0	0	0	0	0	0	0	0	0	0	0	0
snRNA	ENSMMUG00000024879	X	112567838	112568002	+	0	0	0	0	0	0	0	0	0	0	0	0	0	0	0	0	0	0	0	0	0	0	0	0	0	0	0	0	0	0
snoRNA	ENSMMUG00000032743	X	112630389	112630458	+	0	0	0	0	0	0	0	0	0	0	0	0	0	0	0	0	0	0	0	0	0	0	0	0	0	0	0	0	0	0
snoRNA	ENSMMUG00000033074	X	113153573	113153700	+	0	0	0	0	0	0	0	0	0	0	0	0	0	0	0	0	0	0	0	0	0	0	0	0	0	0	0	0	0	0
snRNA	ENSMMUG00000035145	X	113534910	113535018	+	0	0	0	0	0	0	0	0	0	0	0	0	0	0	0	0	0	0	0	0	0	0	0	0	0	0	0	0	0	0
snoRNA	ENSMMUG00000034550	X	113619235	113619363	-	0	0	0	0	0	0	0	0	0	0	0	0	0	0	0	0	0	0	0	0	0	0	0	0	0	0	0	0	0	0
snoRNA	ENSMMUG00000033187	X	114018886	114019016	+	0	0	0	0	0	0	0	0	0	0	0	0	0	0	0	0	0	0	0	0	0	0	0	0	0	0	0	0	0	0
snRNA	ENSMMUG00000035819	X	114174854	114174945	-	0	0	0	0	0	0	0	0	0	0	0	0	0	0	0	0	0	0	0	0	0	0	0	0	0	0	0	0	0	0
snRNA	ENSMMUG00000026243	X	114737258	114737363	-	0	0	0	0	0	0	0	0	0	0	0	0	0	0	0	0	0	0	0	0	0	0	0	0	0	0	0	0	0	0
snoRNA	ENSMMUG00000037338	X	116988202	116988329	+	0	0	0	0	0	0	0	0	0	0	0	0	0	0	0	0	0	0	0	0	0	0	0	0	0	0	0	0	0	0
snRNA	ENSMMUG00000028527	X	117691803	117691966	+	0	0	0	0	0	0	0	0	0	0	0	0	0	0	0	0	0	0	0	0	0	0	0	0	0	0	0	0	0	0
snoRNA	ENSMMUG00000024896	X	118065500	118065631	-	0	0	0	0	0	0	0	0	0	0	0	0	0	0	0	0	0	0	0	0	0	0	0	0	0	0	0	0	0	0
snoRNA	ENSMMUG00000037147	X	118750192	118750295	+	0	0	0	0	0	0	0	0	0	0	0	0	0	0	0	0	0	0	0	0	0	0	0	0	0	0	0	0	0	0
snoRNA	ENSMMUG00000037117	X	118799597	118799698	+	0	0	0	0	0	0	0	0	0	0	0	0	0	0	0	0	0	0	0	0	0	0	0	0	0	0	0	0	0	0
tRNA	tRNA-Pro-GGG-1-1	X	118816830	118816899	+	0	0	0	0	0	0	0	0	0	0	0	0	0	0	0	0	0	0	0	0	0	0	0	0	0	0	0	0	0	0
snRNA	ENSMMUG00000037424	X	119589463	119589524	-	0	0	0	0	0	0	0	0	0	0	0	0	0	0	0	0	0	0	0	0	0	0	0	0	0	0	0	0	0	0
snoRNA	ENSMMUG00000025415	X	121028488	121028704	+	0	0	0	0	0	0	0	0	0	0	0	0	0	0	0	0	0	0	0	0	0	0	0	0	0	0	0	0	0	0
snRNA	ENSMMUG00000037309	X	122114598	122114704	+	0	0	0	0	0	0	0	0	0	0	0	0	0	0	0	0	0	0	0	0	0	0	0	0	0	0	0	0	0	0
snoRNA	ENSMMUG00000036660	X	122374666	122374771	+	0	0	0	0	0	0	0	0	0	0	0	0	0	0	0	0	0	0	0	0	0	0	0	0	0	0	0	0	0	0
snoRNA	ENSMMUG00000035947	X	122437811	122437922	+	0	0	0	0	0	0	0	0	0	0	0	0	0	0	0	0	0	0	0	0	0	0	0	0	0	0	0	0	0	0
snoRNA	ENSMMUG00000035889	X	123191589	123191663	+	0	0	0	0	0	0	0	0	0	0	0	0	0	0	0	0	0	0	0	0	0	0	0	0	0	0	0	0	0	0
snoRNA	ENSMMUG00000036653	X	127754601	127754672	+	0	0	0	0	0	0	0	0	0	0	0	0	0	0	0	0	0	0	0	0	0	0	0	0	0	0	0	0	0	0
snRNA	ENSMMUG00000025578	X	128546008	128546114	-	0	0	0	0	0	0	0	0	0	0	0	0	0	0	0	0	0	0	0	0	0	0	0	0	0	0	0	0	0	0
snoRNA	ENSMMUG00000025616	X	131385865	131386003	+	0	0	0	0	0	0	0	0	0	0	0	0	0	0	0	0	0	0	0	0	0	0	0	0	0	0	0	0	0	0
snRNA	ENSMMUG00000024034	X	131475560	131475720	-	0	0	0	0	0	0	0	0	0	0	0	0	0	0	0	0	0	0	0	0	0	0	0	0	0	0	0	0	0	0
snRNA	ENSMMUG00000027523	X	131768221	131768324	-	0	0	0	0	0	0	0	0	0	0	0	0	0	0	0	0	0	0	0	0	0	0	0	0	0	0	0	0	0	0
snRNA	ENSMMUG00000027617	X	132985300	132985440	-	0	0	0	0	0	0	0	0	0	0	0	0	0	0	0	0	0	0	0	0	0	0	0	0	0	0	0	0	0	0
snRNA	ENSMMUG00000023835	X	133147263	133147371	-	0	0	0	0	0	0	0	0	0	0	0	0	0	0	0	0	0	0	0	0	0	0	0	0	0	0	0	0	0	0
snoRNA	ENSMMUG00000036837	X	134191467	134191570	-	0	0	0	0	0	0	0	0	0	0	0	0	0	0	0	0	0	0	0	0	0	0	0	0	0	0	0	0	0	0
snRNA	ENSMMUG00000036847	X	134640758	134640861	+	0	0	0	0	0	0	0	0	0	0	0	0	0	0	0	0	0	0	0	0	0	0	0	0	0	0	0	0	0	0
snRNA	ENSMMUG00000032857	X	134845878	134845984	+	0	0	0	0	0	0	0	0	0	0	0	0	0	0	0	0	0	0	0	0	0	0	0	0	0	0	0	0	0	0
snRNA	ENSMMUG00000034165	X	135817656	135817759	-	0	0	0	0	0	0	0	0	0	0	0	0	0	0	0	0	0	0	0	0	0	0	0	0	0	0	0	0	0	0
snoRNA	ENSMMUG00000036698	X	137872742	137872845	-	0	0	0	0	0	0	0	0	0	0	0	0	0	0	0	0	0	0	0	0	0	0	0	0	0	0	0	0	0	0
snRNA	ENSMMUG00000037050	X	138063440	138063557	+	0	0	0	0	0	0	0	0	0	0	0	0	0	0	0	0	0	0	0	0	0	0	0	0	0	0	0	0	0	0
snoRNA	ENSMMUG00000037244	X	138085625	138085727	+	0	0	0	0	0	0	0	0	0	0	0	0	0	0	0	0	0	0	0	0	0	0	0	0	0	0	0	0	0	0
snoRNA	ENSMMUG00000032965	X	139077524	139077600	+	0	0	0	0	0	0	0	0	0	0	0	0	0	0	0	0	0	0	0	0	0	0	0	0	0	0	0	0	0	0
snoRNA	ENSMMUG00000035439	X	140986945	140987048	-	0	0	0	0	0	0	0	0	0	0	0	0	0	0	0	0	0	0	0	0	0	0	0	0	0	0	0	0	0	0
snRNA	ENSMMUG00000025027	X	145933791	145933896	+	0	0	0	0	0	0	0	0	0	0	0	0	0	0	0	0	0	0	0	0	0	0	0	0	0	0	0	0	0	0
snRNA	ENSMMUG00000036812	X	147446453	147446513	+	0	0	0	0	0	0	0	0	0	0	0	0	0	0	0	0	0	0	0	0	0	0	0	0	0	0	0	0	0	0
snRNA	ENSMMUG00000036589	X	149039719	149039812	-	0	0	0	0	0	0	0	0	0	0	0	0	0	0	0	0	0	0	0	0	0	0	0	0	0	0	0	0	0	0
snRNA	ENSMMUG00000027891	X	149625636	149625742	+	0	0	0	0	0	0	0	0	0	0	0	0	0	0	0	0	0	0	0	0	0	0	0	0	0	0	0	0	0	0
snRNA	ENSMMUG00000036834	X	150335220	150335324	-	0	0	0	0	0	0	0	0	0	0	0	0	0	0	0	0	0	0	0	0	0	0	0	0	0	0	0	0	0	0
tRNA	tRNA-Leu-CAA-7-1	X	150552564	150552623	-	0	0	0	0	0	0	0	0	0	0	0	0	0	0	0	0	0	0	0	0	0	0	0	0	0	0	0	0	0	0
snoRNA	ENSMMUG00000037019	X	151411844	151411947	+	0	0	0	0	0	0	0	0	0	0	0	0	0	0	0	0	0	0	0	0	0	0	0	0	0	0	0	0	0	0
snoRNA	ENSMMUG00000036800	X	151968750	151968814	+	0	0	0	0	0	0	0	0	0	0	0	0	0	0	0	0	0	0	0	0	0	0	0	0	0	0	0	0	0	0
snoRNA	ENSMMUG00000023953	X	152420120	152420254	+	0	0	0	0	0	0	0	0	0	0	0	0	0	0	0	0	0	0	0	0	0	0	0	0	0	0	0	0	0	0
snoRNA	ENSMMUG00000025417	X	152763450	152763581	+	0	0	0	0	0	0	0	0	0	0	0	0	0	0	0	0	0	0	0	0	0	0	0	0	0	0	0	0	0	0
snoRNA	ENSMMUG00000024169	X	152769326	152769454	+	0	0	0	0	0	0	0	0	0	0	0	0	0	0	0	0	0	0	0	0	0	0	0	0	0	0	0	0	0	0
snRNA	ENSMMUG00000036304	1	860499	860560	+	0	0	0	0	0	0	0	0	0	0	0	0	0	0	0	0	0	0	0	0	0	0	0	0	0	0	0	0	0	0
snRNA	ENSMMUG00000026329	1	897441	897547	-	0	0	0	0	0	0	0	0	0	0	0	0	0	0	0	0	0	0	0	0	0	0	0	0	0	0	0	0	0	0
snoRNA	ENSMMUG00000037416	1	1983681	1983805	-	0	0	0	0	0	0	0	0	0	0	0	0	0	0	0	0	0	0	0	0	0	0	0	0	0	0	0	0	0	0
snoRNA	ENSMMUG00000033169	1	2842118	2842252	-	0	0	0	0	0	0	0	0	0	0	0	0	0	0	0	0	0	0	0	0	0	0	0	0	0	0	0	0	0	0
snRNA	ENSMMUG00000034360	1	9559424	9559533	+	0	0	0	0	0	0	0	0	0	0	0	0	0	0	0	0	0	0	0	0	0	0	0	0	0	0	0	0	0	0
snRNA	ENSMMUG00000024768	1	10252776	10252940	+	0	0	0	0	0	0	0	0	0	0	0	0	0	0	0	0	0	0	0	0	0	0	0	0	0	0	0	0	0	0
tRNA	tRNA-SeC-TCA-2-1	1	11049865	11049935	-	0	0	0	0	0	0	0	0	0	0	0	0	0	0	0	0	0	0	0	0	0	0	0	0	0	0	0	0	0	0
snRNA	ENSMMUG00000025581	1	11236131	11236294	-	0	0	0	0	0	0	0	0	0	0	0	0	0	0	0	0	0	0	0	0	0	0	0	0	0	0	0	0	0	0
snRNA	ENSMMUG00000036290	1	11318543	11318645	-	0	0	0	0	0	0	0	0	0	0	0	0	0	0	0	0	0	0	0	0	0	0	0	0	0	0	0	0	0	0
snoRNA	ENSMMUG00000034048	1	11532488	11532612	-	0	0	0	0	0	0	0	0	0	0	0	0	0	0	0	0	0	0	0	0	0	0	0	0	0	0	0	0	0	0
snoRNA	ENSMMUG00000037423	1	12137256	12137425	+	0	0	0	0	0	0	0	0	0	0	0	0	0	0	0	0	0	0	0	0	0	0	0	0	0	0	0	0	0	0
snRNA	ENSMMUG00000025679	1	13249061	13249163	+	0	0	0	0	0	0	0	0	0	0	0	0	0	0	0	0	0	0	0	0	0	0	0	0	0	0	0	0	0	0
snoRNA	ENSMMUG00000036354	1	14270384	14270490	-	0	0	0	0	0	0	0	0	0	0	0	0	0	0	0	0	0	0	0	0	0	0	0	0	0	0	0	0	0	0
snRNA	ENSMMUG00000024188	1	14328635	14328741	+	0	0	0	0	0	0	0	0	0	0	0	0	0	0	0	0	0	0	0	0	0	0	0	0	0	0	0	0	0	0
snRNA	ENSMMUG00000037413	1	15017396	15017543	-	0	0	0	0	0	0	0	0	0	0	0	0	0	0	0	0	0	0	0	0	0	0	0	0	0	0	0	0	0	0
snRNA	ENSMMUG00000034732	1	15191440	15191543	-	0	0	0	0	0	0	0	0	0	0	0	0	0	0	0	0	0	0	0	0	0	0	0	0	0	0	0	0	0	0
snoRNA	ENSMMUG00000036570	1	15334624	15334749	-	0	0	0	0	0	0	0	0	0	0	0	0	0	0	0	0	0	0	0	0	0	0	0	0	0	0	0	0	0	0
snoRNA	ENSMMUG00000037284	1	15623015	15623180	+	0	0	0	0	0	0	0	0	0	0	0	0	0	0	0	0	0	0	0	0	0	0	0	0	0	0	0	0	0	0
snRNA	ENSMMUG00000034016	1	15689188	15689289	-	0	0	0	0	0	0	0	0	0	0	0	0	0	0	0	0	0	0	0	0	0	0	0	0	0	0	0	0	0	0
snoRNA	ENSMMUG00000037047	1	15864468	15864571	+	0	0	0	0	0	0	0	0	0	0	0	0	0	0	0	0	0	0	0	0	0	0	0	0	0	0	0	0	0	0
snoRNA	ENSMMUG00000036792	1	16334900	16335045	-	0	0	0	0	0	0	0	0	0	0	0	0	0	0	0	0	0	0	0	0	0	0	0	0	0	0	0	0	0	0
snRNA	ENSMMUG00000032868	1	16753521	16753623	-	0	0	0	0	0	0	0	0	0	0	0	0	0	0	0	0	0	0	0	0	0	0	0	0	0	0	0	0	0	0
snoRNA	ENSMMUG00000035614	1	18326538	18326677	+	0	0	0	0	0	0	0	0	0	0	0	0	0	0	0	0	0	0	0	0	0	0	0	0	0	0	0	0	0	0
snoRNA	ENSMMUG00000035761	1	18711966	18712066	+	0	0	0	0	0	0	0	0	0	0	0	0	0	0	0	0	0	0	0	0	0	0	0	0	0	0	0	0	0	0
snRNA	ENSMMUG00000035621	1	19343758	19343881	+	0	0	0	0	0	0	0	0	0	0	0	0	0	0	0	0	0	0	0	0	0	0	0	0	0	0	0	0	0	0
tRNA	tRNA-Gly-CCC-1-1	1	19382262	19382333	-	0	0	0	0	0	0	0	0	0	0	0	0	0	0	0	0	0	0	0	0	0	0	0	0	0	0	0	0	0	0
tRNA	tRNA-Asn-GTT-7-1	1	19398192	19398266	+	0	0	0	0	0	0	0	0	0	0	0	0	0	0	0	0	0	0	0	0	0	0	0	0	0	0	0	0	0	0
snRNA	ENSMMUG00000027377	1	19434620	19434783	-	14	17	18	9	7	23	12	16	8	8	9	5	9	13	8	15	20	13	9	7	11	7	11	5	19	17	8	17	22	7
snRNA	ENSMMUG00000027769	1	19443438	19443601	-	14	15	18	11	7	23	14	16	6	12	11	4	11	14	10	15	21	17	12	5	11	8	11	3	18	18	8	17	24	10
snRNA	ENSMMUG00000036614	1	19466686	19466829	-	0	0	0	0	0	0	0	0	0	0	0	0	0	0	0	0	0	0	0	0	0	0	0	0	0	0	0	0	0	0
tRNA	tRNA-Asn-GTT-3-1	1	19505855	19505929	-	0	0	0	0	0	0	0	0	0	0	0	0	0	0	0	0	0	0	0	0	0	0	0	0	0	0	0	0	0	0
tRNA	tRNA-Asn-GTT-10-1	1	19531967	19532041	-	0	0	0	0	0	0	0	0	0	0	0	0	0	0	0	0	0	0	0	0	0	0	0	0	0	0	0	0	0	0
snRNA	ENSMMUG00000027471	1	19532213	19532376	+	16	18	21	10	8	30	12	17	9	11	11	6	12	17	9	15	21	20	11	7	15	8	12	4	22	19	8	19	25	10
tRNA	tRNA-Glu-TTC-7-1	1	19534696	19534768	-	0	0	0	0	0	0	0	0	0	0	0	0	0	0	0	0	0	0	0	0	0	0	0	0	0	0	0	0	0	0
tRNA	tRNA-Gly-CCC-2-1	1	19539474	19539545	-	0	0	0	0	0	0	0	0	0	0	0	0	0	0	0	0	0	0	0	0	0	0	0	0	0	0	0	0	0	0
tRNA	tRNA-Gly-CCC-2-2	1	19552297	19552368	+	0	0	0	0	0	0	0	0	0	0	0	0	0	0	0	0	0	0	0	0	0	0	0	0	0	0	0	0	0	0
tRNA	tRNA-Asn-GTT-3-2	1	19604140	19604214	+	0	0	0	0	0	0	0	0	0	0	0	0	0	0	0	0	0	0	0	0	0	0	0	0	0	0	0	0	0	0
snRNA	ENSMMUG00000026656	1	21958779	21958885	-	0	0	0	0	0	0	0	0	0	0	0	0	0	0	0	0	0	0	0	0	0	0	0	0	0	0	0	0	0	0
snoRNA	ENSMMUG00000037182	1	22187598	22187702	-	0	0	0	0	0	0	0	0	0	0	0	0	0	0	0	0	0	0	0	0	0	0	0	0	0	0	0	0	0	0
snRNA	ENSMMUG00000036913	1	23504294	23504355	+	0	0	0	0	0	0	0	0	0	0	0	0	0	0	0	0	0	0	0	0	0	0	0	0	0	0	0	0	0	0
snRNA	ENSMMUG00000036376	1	24344465	24344521	+	0	0	0	0	0	0	0	0	0	0	0	0	0	0	0	0	0	0	0	0	0	0	0	0	0	0	0	0	0	0
snRNA	ENSMMUG00000026504	1	24605256	24605359	+	0	0	0	0	0	0	0	0	0	0	0	0	0	0	0	0	0	0	0	0	0	0	0	0	0	0	0	0	0	0
snRNA	ENSMMUG00000036025	1	25753528	25753624	+	0	0	0	0	0	0	0	0	0	0	0	0	0	0	0	0	0	0	0	0	0	0	0	0	0	0	0	0	0	0
snoRNA	ENSMMUG00000035773	1	26503388	26503488	+	0	0	0	0	0	0	0	0	0	0	0	0	0	0	0	0	0	0	0	0	0	0	0	0	0	0	0	0	0	0
snRNA	ENSMMUG00000037332	1	26765458	26765513	-	0	0	0	0	0	0	0	0	0	0	0	0	0	0	0	0	0	0	0	0	0	0	0	0	0	0	0	0	0	0
snoRNA	ENSMMUG00000035924	1	27307072	27307166	-	0	0	0	0	0	0	0	0	0	0	0	0	0	0	0	0	0	0	0	0	0	0	0	0	0	0	0	0	0	0
snRNA	ENSMMUG00000027844	1	27406683	27406785	-	0	0	0	0	0	0	0	0	0	0	0	0	0	0	0	0	0	0	0	0	0	0	0	0	0	0	0	0	0	0
snoRNA	ENSMMUG00000035997	1	27909788	27909891	-	0	0	0	0	0	0	0	0	0	0	0	0	0	0	0	0	0	0	0	0	0	0	0	0	0	0	0	0	0	0
snRNA	ENSMMUG00000026250	1	28572728	28572831	+	0	0	0	0	0	0	0	0	0	0	0	0	0	0	0	0	0	0	0	0	0	0	0	0	0	0	0	0	0	0
snoRNA	ENSMMUG00000036048	1	28619663	28619786	+	0	0	0	0	0	0	0	0	0	0	0	0	0	0	0	0	0	0	0	0	0	0	0	0	0	0	0	0	0	0
snoRNA	ENSMMUG00000035687	1	28619872	28619954	+	0	0	0	0	0	0	0	0	0	0	0	0	0	0	0	0	0	0	0	0	0	0	0	0	0	0	0	0	0	0
snoRNA	ENSMMUG00000037049	1	29290929	29291032	-	0	0	0	0	0	0	0	0	0	0	0	0	0	0	0	0	0	0	0	0	0	0	0	0	0	0	0	0	0	0
snRNA	ENSMMUG00000024844	1	30000293	30000399	+	0	0	0	0	0	0	0	0	0	0	0	0	0	0	0	0	0	0	0	0	0	0	0	0	0	0	0	0	0	0
snRNA	ENSMMUG00000024325	1	30387851	30387955	+	0	0	0	0	0	0	0	0	0	0	0	0	0	0	0	0	0	0	0	0	0	0	0	0	0	0	0	0	0	0
snRNA	ENSMMUG00000035925	1	30518230	30518330	+	0	0	0	0	0	0	0	0	0	0	0	0	0	0	0	0	0	0	0	0	0	0	0	0	0	0	0	0	0	0
snoRNA	ENSMMUG00000036811	1	30527617	30527782	+	0	0	0	0	0	0	0	0	0	0	0	0	0	0	0	0	0	0	0	0	0	0	0	0	0	0	0	0	0	0
snRNA	ENSMMUG00000036573	1	30829757	30829861	-	0	0	0	0	0	0	0	0	0	0	0	0	0	0	0	0	0	0	0	0	0	0	0	0	0	0	0	0	0	0
snRNA	ENSMMUG00000037235	1	30831538	30831599	-	0	0	0	0	0	0	0	0	0	0	0	0	0	0	0	0	0	0	0	0	0	0	0	0	0	0	0	0	0	0
snRNA	ENSMMUG00000036810	1	30845185	30845246	+	0	0	0	0	0	0	0	0	0	0	0	0	0	0	0	0	0	0	0	0	0	0	0	0	0	0	0	0	0	0
snRNA	ENSMMUG00000034050	1	31191656	31191773	+	0	0	0	0	0	0	0	0	0	0	0	0	0	0	0	0	0	0	0	0	0	0	0	0	0	0	0	0	0	0
snoRNA	ENSMMUG00000025750	1	31230549	31230753	+	1	2	2	1	2	2	2	1	2	5	3	3	1	1	0	2	3	1	2	1	4	0	1	1	4	1	3	3	5	5
snoRNA	ENSMMUG00000024314	1	31231443	31231646	+	0	0	0	0	0	0	0	0	0	1	1	1	0	0	0	1	0	0	1	0	1	0	0	0	1	0	0	1	1	0
snoRNA	ENSMMUG00000034081	1	31310136	31310207	-	0	1	0	0	1	0	0	0	1	0	0	0	0	0	0	0	1	0	1	0	2	0	0	0	0	1	0	0	0	1
snoRNA	ENSMMUG00000024421	1	31311078	31311207	-	0	0	2	0	0	0	0	0	0	0	0	0	0	0	0	0	0	0	0	0	0	0	0	0	0	0	0	0	0	0
snoRNA	ENSMMUG00000024665	1	31311695	31311826	-	0	0	0	0	0	0	0	0	0	0	0	0	0	0	0	0	0	0	0	0	0	0	0	0	0	0	0	0	1	0
snoRNA	ENSMMUG00000024102	1	31312225	31312359	-	0	0	0	0	0	0	0	0	0	0	0	0	0	0	0	0	0	0	0	0	0	0	0	0	0	0	0	0	0	0
snRNA	ENSMMUG00000032811	1	31372261	31372394	+	0	1	1	0	1	1	1	1	1	0	1	0	0	0	0	1	2	1	1	0	1	1	1	0	1	1	0	1	3	0
snoRNA	ENSMMUG00000035843	1	31413709	31413838	+	0	0	0	0	0	0	0	0	0	0	0	0	0	0	0	0	0	0	0	0	0	0	0	0	0	0	0	0	0	0
snoRNA	ENSMMUG00000025533	1	33703529	33703614	-	0	2	0	0	0	1	1	0	1	0	1	1	1	0	0	0	2	1	0	0	3	0	0	0	1	1	1	0	1	0
snoRNA	ENSMMUG00000024535	1	33717694	33717778	-	0	0	1	0	0	1	0	0	1	2	1	0	0	1	0	0	1	0	0	0	1	0	1	0	1	1	1	0	1	0
snoRNA	ENSMMUG00000025554	1	33736524	33736596	-	14	25	26	12	21	23	29	18	34	19	14	35	11	17	5	13	19	12	26	20	64	9	32	16	14	18	11	17	34	18
snoRNA	ENSMMUG00000028280	1	38114535	38114684	+	0	0	0	0	0	0	0	0	0	0	0	0	0	0	0	0	0	0	0	0	0	0	0	0	0	0	0	0	0	0
snRNA	ENSMMUG00000035345	1	39268693	39268831	-	0	0	0	0	0	0	0	0	0	0	0	0	0	0	0	0	0	0	0	0	0	0	0	0	0	0	0	0	0	0
snoRNA	ENSMMUG00000024139	1	39283595	39283723	-	0	0	0	0	0	0	0	0	0	0	0	0	0	0	0	0	0	0	0	0	0	0	0	0	0	0	0	0	0	0
snoRNA	ENSMMUG00000036026	1	40757589	40757678	+	0	0	0	0	0	0	0	0	0	0	0	0	0	0	0	0	0	0	0	0	0	0	0	0	0	0	0	0	0	0
snRNA	ENSMMUG00000035358	1	40758370	40758464	+	0	0	0	0	0	0	0	0	0	0	0	0	0	0	0	0	0	0	0	0	0	0	0	0	0	0	0	0	0	0
snRNA	ENSMMUG00000027461	1	41270908	41271014	+	0	0	0	0	0	0	0	0	0	0	0	0	0	0	0	0	0	0	0	0	0	0	0	0	0	0	0	0	0	0
snRNA	ENSMMUG00000035697	1	41789936	41790046	+	0	0	0	0	0	0	0	0	0	0	0	0	0	0	0	0	0	0	0	0	0	0	0	0	0	0	0	0	0	0
snRNA	ENSMMUG00000024498	1	41995819	41995923	-	0	0	0	0	0	0	0	0	0	0	0	0	0	0	0	0	0	0	0	0	0	0	0	0	0	0	0	0	0	0
snoRNA	ENSMMUG00000025148	1	42437886	42438020	-	0	0	1	0	0	0	0	0	0	0	0	0	0	0	0	0	1	0	0	0	1	0	0	0	0	1	0	1	0	0
tRNA	tRNA-Lys-CTT-9-1	1	42589478	42589547	+	0	0	0	0	0	0	0	0	0	0	0	0	0	0	0	0	0	0	0	0	0	0	0	0	0	0	0	0	0	0
snRNA	ENSMMUG00000036124	1	42601811	42601872	-	0	0	0	0	0	0	0	0	0	0	0	0	0	0	0	0	0	0	0	0	0	0	0	0	0	0	0	0	0	0
snRNA	ENSMMUG00000027950	1	43062027	43062133	+	0	0	0	0	0	0	0	0	0	0	0	0	0	0	0	0	0	0	0	0	0	0	0	0	0	0	0	0	0	0
snRNA	ENSMMUG00000027357	1	45462029	45462131	+	0	0	0	0	0	0	0	0	0	0	0	0	0	0	0	0	0	0	0	0	0	0	0	0	0	0	0	0	0	0
snRNA	ENSMMUG00000027894	1	45885888	45885994	+	0	0	0	0	0	0	0	0	0	0	0	0	0	0	0	0	0	0	0	0	0	0	0	0	0	0	0	0	0	0
snRNA	ENSMMUG00000036088	1	45922007	45922095	-	0	0	0	0	0	0	0	0	0	0	0	0	0	0	0	0	0	0	0	0	0	0	0	0	0	0	0	0	0	0
snRNA	ENSMMUG00000027444	1	46114056	46114162	-	0	0	0	0	0	0	0	0	0	0	0	0	0	0	0	0	0	0	0	0	0	0	0	0	0	0	0	0	0	0
snRNA	ENSMMUG00000037367	1	46630443	46630532	+	0	0	0	0	0	0	0	0	0	0	0	0	0	0	0	0	0	0	0	0	0	0	0	0	0	0	0	0	0	0
snRNA	ENSMMUG00000024659	1	47314582	47314682	+	0	0	0	0	0	0	0	0	0	0	0	0	0	0	0	0	0	0	0	0	0	0	0	0	0	0	0	0	0	0
snRNA	ENSMMUG00000027468	1	47652506	47652622	-	0	0	0	0	0	0	0	0	0	0	0	0	0	0	0	0	0	0	0	0	0	0	0	0	0	0	0	0	0	0
snoRNA	ENSMMUG00000026062	1	47707723	47707826	+	3	4	10	2	3	3	5	3	3	5	3	4	2	4	0	4	6	2	5	3	17	0	4	1	3	7	2	6	11	3
snoRNA	ENSMMUG00000026127	1	47709037	47709105	+	12	18	19	8	13	14	19	10	17	27	18	24	16	10	7	15	18	11	20	11	36	5	15	13	19	16	20	18	18	23
snoRNA	ENSMMUG00000025160	1	47709578	47709644	+	15	28	31	17	24	16	40	12	44	33	20	52	14	11	9	18	17	12	45	28	82	7	37	20	19	24	19	23	39	26
snRNA	ENSMMUG00000028099	1	47748410	47748526	-	0	0	0	0	0	0	0	0	0	0	0	0	0	0	0	0	0	0	0	0	0	0	0	0	0	0	0	0	0	0
snoRNA	ENSMMUG00000037354	1	48273704	48273804	-	0	0	0	0	0	0	0	0	0	0	0	0	0	0	0	0	0	0	0	0	0	0	0	0	0	0	0	0	0	0
tRNA	tRNA-Met-CAT-6-1	1	49633370	49633443	+	0	0	0	0	0	0	0	0	0	0	0	0	0	0	0	0	0	0	0	0	0	0	0	0	0	0	0	0	0	0
snRNA	ENSMMUG00000024035	1	51230747	51230853	+	0	0	0	0	0	0	0	0	0	0	0	0	0	0	0	0	0	0	0	0	0	0	0	0	0	0	0	0	0	0
snoRNA	ENSMMUG00000036413	1	52032576	52032673	+	0	0	0	0	0	0	0	0	0	0	0	0	0	0	0	0	0	0	0	0	0	0	0	0	0	0	0	0	0	0
snRNA	ENSMMUG00000023990	1	53407039	53407145	+	0	0	0	0	0	0	0	0	0	0	0	0	0	0	0	0	0	0	0	0	0	0	0	0	0	0	0	0	0	0
snoRNA	ENSMMUG00000035619	1	54056168	54056271	-	0	0	0	0	0	0	0	0	0	0	0	0	0	0	0	0	0	0	0	0	0	0	0	0	0	0	0	0	0	0
snRNA	ENSMMUG00000028029	1	54200635	54200741	+	0	0	0	0	0	0	0	0	0	0	0	0	0	0	0	0	0	0	0	0	0	0	0	0	0	0	0	0	0	0
snRNA	ENSMMUG00000035887	1	54360930	54361030	-	0	0	0	0	0	0	0	0	0	0	0	0	0	0	0	0	0	0	0	0	0	0	0	0	0	0	0	0	0	0
snoRNA	ENSMMUG00000033160	1	54543698	54543819	-	0	0	0	0	0	0	0	0	0	0	0	0	0	0	0	0	0	0	0	0	0	0	0	0	0	0	0	0	0	0
snoRNA	ENSMMUG00000036521	1	55246219	55246299	+	0	0	0	0	0	0	0	0	0	0	0	0	0	0	0	0	0	0	0	0	0	0	0	0	0	0	0	0	0	0
snRNA	ENSMMUG00000034993	1	55651326	55651467	+	0	0	0	0	0	0	0	0	0	0	0	0	0	0	0	0	0	0	0	0	0	0	0	0	0	0	0	0	0	0
snRNA	ENSMMUG00000025663	1	55654031	55654135	-	0	0	0	0	0	0	0	0	0	0	0	0	0	0	0	0	0	0	0	0	0	0	0	0	0	0	0	0	0	0
snRNA	ENSMMUG00000037336	1	56552363	56552426	-	0	0	0	0	0	0	0	0	0	0	0	0	0	0	0	0	0	0	0	0	0	0	0	0	0	0	0	0	0	0
snRNA	ENSMMUG00000037075	1	58266384	58266490	+	0	0	0	0	0	0	0	0	0	0	0	0	0	0	0	0	0	0	0	0	0	0	0	0	0	0	0	0	0	0
tRNA	tRNA-Lys-CTT-3-1	1	58306066	58306142	-	0	0	0	0	0	0	0	0	0	0	0	0	0	0	0	0	0	0	0	0	0	0	0	0	0	0	0	0	0	0
snRNA	ENSMMUG00000024138	1	64625207	64625313	+	0	0	0	0	0	0	0	0	0	0	0	0	0	0	0	0	0	0	0	0	0	0	0	0	0	0	0	0	0	0
snRNA	ENSMMUG00000036666	1	64660055	64660161	+	0	0	0	0	0	0	0	0	0	0	0	0	0	0	0	0	0	0	0	0	0	0	0	0	0	0	0	0	0	0
snRNA	ENSMMUG00000024818	1	65109610	65109717	-	0	0	0	0	0	0	0	0	0	0	0	0	0	0	0	0	0	0	0	0	0	0	0	0	0	0	0	0	0	0
snRNA	ENSMMUG00000035870	1	66084118	66084179	-	0	0	0	0	0	0	0	0	0	0	0	0	0	0	0	0	0	0	0	0	0	0	0	0	0	0	0	0	0	0
snRNA	ENSMMUG00000037003	1	66315149	66315209	-	0	0	0	0	0	0	0	0	0	0	0	0	0	0	0	0	0	0	0	0	0	0	0	0	0	0	0	0	0	0
snRNA	ENSMMUG00000036581	1	67162953	67163014	-	0	0	0	0	0	0	0	0	0	0	0	0	0	0	0	0	0	0	0	0	0	0	0	0	0	0	0	0	0	0
snRNA	ENSMMUG00000035355	1	67798470	67798578	-	0	0	0	0	0	0	0	0	0	0	0	0	0	0	0	0	0	0	0	0	0	0	0	0	0	0	0	0	0	0
snRNA	ENSMMUG00000034409	1	68204881	68205071	+	0	0	0	0	0	0	0	0	0	0	0	0	0	0	0	0	0	0	0	0	0	0	0	0	0	0	0	0	0	0
snoRNA	ENSMMUG00000036975	1	68345013	68345116	+	0	0	0	0	0	0	0	0	0	0	0	0	0	0	0	0	0	0	0	0	0	0	0	0	0	0	0	0	0	0
snRNA	ENSMMUG00000026260	1	68895083	68895167	-	0	0	0	0	0	0	0	0	0	0	0	0	0	0	0	0	0	0	0	0	0	0	0	0	0	0	0	0	0	0
snoRNA	ENSMMUG00000037202	1	69876141	69876275	-	0	0	0	0	0	0	0	0	0	0	0	0	0	0	0	0	0	0	0	0	0	0	0	0	0	0	0	0	0	0
snRNA	ENSMMUG00000037162	1	69980103	69980204	+	0	0	0	0	0	0	0	0	0	0	0	0	0	0	0	0	0	0	0	0	0	0	0	0	0	0	0	0	0	0
snRNA	ENSMMUG00000036006	1	70050869	70050994	-	0	0	0	0	0	0	0	0	0	0	0	0	0	0	0	0	0	0	0	0	0	0	0	0	0	0	0	0	0	0
snRNA	ENSMMUG00000034895	1	70204901	70205005	+	0	0	0	0	0	0	0	0	0	0	0	0	0	0	0	0	0	0	0	0	0	0	0	0	0	0	0	0	0	0
snRNA	ENSMMUG00000027592	1	70329079	70329185	+	0	0	0	0	0	0	0	0	0	0	0	0	0	0	0	0	0	0	0	0	0	0	0	0	0	0	0	0	0	0
snRNA	ENSMMUG00000036335	1	70560725	70560785	-	0	0	0	0	0	0	0	0	0	0	0	0	0	0	0	0	0	0	0	0	0	0	0	0	0	0	0	0	0	0
snoRNA	ENSMMUG00000025722	1	73878960	73879090	-	0	1	0	0	0	0	0	1	1	1	0	1	1	1	0	1	1	0	0	1	1	0	1	0	1	0	1	1	2	1
snRNA	ENSMMUG00000028002	1	75542048	75542154	-	0	0	0	0	0	0	0	0	0	0	0	0	0	0	0	0	0	0	0	0	0	0	0	0	0	0	0	0	0	0
snRNA	ENSMMUG00000035919	1	76689007	76689116	+	0	0	0	0	0	0	0	0	0	0	0	0	0	0	0	0	0	0	0	0	0	0	0	0	0	0	0	0	0	0
snRNA	ENSMMUG00000027524	1	77988077	77988183	+	0	0	0	0	0	0	0	0	0	0	0	0	0	0	0	0	0	0	0	0	0	0	0	0	0	0	0	0	0	0
snRNA	ENSMMUG00000035701	1	78335135	78335238	-	0	0	0	0	0	0	0	0	0	0	0	0	0	0	0	0	0	0	0	0	0	0	0	0	0	0	0	0	0	0
snoRNA	ENSMMUG00000025802	1	78589811	78589889	+	1	3	3	1	4	2	5	1	6	5	2	8	3	1	0	2	1	1	4	3	11	1	5	2	2	1	3	2	4	2
snoRNA	ENSMMUG00000025228	1	78590617	78590700	+	5	9	11	4	9	6	10	5	15	8	4	22	4	5	1	4	7	2	12	11	29	1	10	9	5	5	9	8	10	6
snoRNA	ENSMMUG00000026673	1	78592228	78592300	+	1	3	2	1	2	2	3	1	3	4	3	6	2	1	0	2	2	1	3	2	6	0	3	2	2	2	2	1	3	2
snRNA	ENSMMUG00000025559	1	79583249	79583354	+	0	0	0	0	0	0	0	0	0	0	0	0	0	0	0	0	0	0	0	0	0	0	0	0	0	0	0	0	0	0
snRNA	ENSMMUG00000037431	1	80925875	80925970	-	0	0	0	0	0	0	0	0	0	0	0	0	0	0	0	0	0	0	0	0	0	0	0	0	0	0	0	0	0	0
snoRNA	ENSMMUG00000025711	1	82665833	82665953	-	0	0	0	0	0	0	0	0	0	0	0	0	0	0	0	0	0	0	0	0	0	0	0	0	0	0	0	0	0	0
snoRNA	ENSMMUG00000024022	1	87077099	87077235	+	0	0	0	0	0	0	0	0	0	0	0	0	0	0	0	0	0	0	0	0	0	0	0	0	0	0	0	0	0	0
snRNA	ENSMMUG00000027639	1	91543735	91543841	+	0	0	0	0	0	0	0	0	0	0	0	0	0	0	0	0	0	0	0	0	0	0	0	0	0	0	0	0	0	0
snoRNA	ENSMMUG00000037394	1	92449342	92449446	-	0	0	0	0	0	0	0	0	0	0	0	0	0	0	0	0	0	0	0	0	0	0	0	0	0	0	0	0	0	0
snRNA	ENSMMUG00000025388	1	92930763	92930869	-	0	0	0	0	0	0	0	0	0	0	0	0	0	0	0	0	0	0	0	0	0	0	0	0	0	0	0	0	0	0
snoRNA	ENSMMUG00000024750	1	93367299	93367503	+	0	0	0	0	0	0	0	0	0	0	0	0	0	0	0	0	0	0	0	0	0	0	0	0	0	0	0	0	0	0
snRNA	ENSMMUG00000036474	1	94160530	94160661	-	0	0	0	0	0	0	0	0	0	0	0	0	0	0	0	0	0	0	0	0	0	0	0	0	0	0	0	0	0	0
snRNA	ENSMMUG00000024249	1	95684001	95684120	-	0	0	0	0	0	0	0	0	0	0	0	0	0	0	0	0	0	0	0	0	0	0	0	0	0	0	0	0	0	0
snoRNA	ENSMMUG00000028449	1	95829963	95830057	+	5	12	13	5	6	7	8	5	12	9	10	12	5	6	3	4	6	4	12	4	29	1	8	4	4	9	7	9	13	6
snoRNA	ENSMMUG00000026648	1	95833374	95833504	+	0	0	0	0	0	0	0	0	0	0	0	0	0	1	0	1	0	0	0	0	1	0	1	0	0	1	0	0	1	0
snoRNA	ENSMMUG00000025705	1	95838411	95838533	+	0	0	0	0	0	0	0	0	0	0	0	0	0	0	0	0	0	0	0	0	0	0	0	0	0	0	0	0	0	0
snRNA	ENSMMUG00000037178	1	95964280	95964386	-	0	0	0	0	0	0	0	0	0	0	0	0	0	0	0	0	0	0	0	0	0	0	0	0	0	0	0	0	0	0
snRNA	ENSMMUG00000036946	1	96007967	96008061	+	0	0	0	0	0	0	0	0	0	0	0	0	0	0	0	0	0	0	0	0	0	0	0	0	0	0	0	0	0	0
snoRNA	ENSMMUG00000036132	1	97150080	97150183	+	0	0	0	0	0	0	0	0	0	0	0	0	0	0	0	0	0	0	0	0	0	0	0	0	0	0	0	0	0	0
tRNA	tRNA-Arg-TCT-2-1	1	97608096	97608181	+	0	0	0	0	0	0	0	0	0	0	0	0	0	0	0	0	0	0	0	0	0	0	0	0	0	0	0	0	0	0
snRNA	ENSMMUG00000025751	1	99282288	99282447	+	0	0	0	0	0	0	0	0	0	0	0	0	0	0	0	0	0	0	0	0	0	0	0	0	0	0	0	0	0	0
snRNA	ENSMMUG00000028327	1	102644317	102644423	+	0	0	0	0	0	0	0	0	0	0	0	0	0	0	0	0	0	0	0	0	0	0	0	0	0	0	0	0	0	0
snRNA	ENSMMUG00000026787	1	102849169	102849314	-	0	0	0	0	0	0	0	0	0	0	0	0	0	0	0	0	0	0	0	0	0	0	0	0	0	0	0	0	0	0
snRNA	ENSMMUG00000027859	1	103066139	103066241	-	0	0	0	0	0	0	0	0	0	0	0	0	0	0	0	0	0	0	0	0	0	0	0	0	0	0	0	0	0	0
snoRNA	ENSMMUG00000036728	1	104195012	104195198	+	0	0	0	0	0	0	0	0	0	0	0	0	0	0	0	0	0	0	0	0	0	0	0	0	0	0	0	0	0	0
snoRNA	ENSMMUG00000037389	1	104293658	104293761	-	0	0	0	0	0	0	0	0	0	0	0	0	0	0	0	0	0	0	0	0	0	0	0	0	0	0	0	0	0	0
snRNA	ENSMMUG00000035798	1	104911764	104911870	+	0	0	0	0	0	0	0	0	0	0	0	0	0	0	0	0	0	0	0	0	0	0	0	0	0	0	0	0	0	0
snRNA	ENSMMUG00000036216	1	105166526	105166637	-	0	0	0	0	0	0	0	0	0	0	0	0	0	0	0	0	0	0	0	0	0	0	0	0	0	0	0	0	0	0
snoRNA	ENSMMUG00000035645	1	112155066	112155489	+	1	3	3	1	2	1	3	2	2	2	1	3	1	1	1	2	2	1	3	1	7	0	3	1	1	1	2	2	4	1
snRNA	ENSMMUG00000037250	1	112256995	112257057	-	0	0	0	0	0	0	0	0	0	0	0	0	0	0	0	0	0	0	0	0	0	0	0	0	0	0	0	0	0	0
snRNA	ENSMMUG00000026505	1	112651967	112652076	-	0	0	0	0	0	0	0	0	0	0	0	0	0	0	0	0	0	0	0	0	0	0	0	0	0	0	0	0	0	0
snoRNA	ENSMMUG00000035455	1	113338869	113338992	+	0	0	0	0	0	0	0	0	0	0	0	0	0	0	0	0	0	0	0	0	0	0	0	0	0	0	0	0	0	0
snoRNA	ENSMMUG00000037267	1	113399810	113399880	+	0	0	0	0	0	0	0	0	0	0	0	0	0	0	0	0	0	0	0	0	0	0	0	0	0	0	0	0	0	0
snRNA	ENSMMUG00000025561	1	114490959	114491065	-	0	0	0	0	0	0	0	0	0	0	0	0	0	0	0	0	0	0	0	0	0	0	0	0	0	0	0	0	0	0
snRNA	ENSMMUG00000026576	1	114657558	114657665	-	0	0	0	0	0	0	0	0	0	0	0	0	0	0	0	0	0	0	0	0	0	0	0	0	0	0	0	0	0	0
snoRNA	ENSMMUG00000037036	1	115201634	115201729	+	0	0	0	0	0	0	0	0	0	0	0	0	0	0	0	0	0	0	0	0	0	0	0	0	0	0	0	0	0	0
snoRNA	ENSMMUG00000036704	1	115349585	115349688	+	0	0	0	0	0	0	0	0	0	0	0	0	0	0	0	0	0	0	0	0	0	0	0	0	0	0	0	0	0	0
snRNA	ENSMMUG00000037429	1	115627730	115627790	-	0	0	0	0	0	0	0	0	0	0	0	0	0	0	0	0	0	0	0	0	0	0	0	0	0	0	0	0	0	0
snoRNA	ENSMMUG00000035525	1	115643615	115643713	+	0	0	0	0	0	0	0	0	0	0	0	0	0	0	0	0	0	0	0	0	0	0	0	0	0	0	0	0	0	0
snoRNA	ENSMMUG00000028346	1	118605052	118605185	-	0	0	0	0	0	0	0	0	0	0	0	0	0	0	0	0	0	0	0	0	0	0	0	0	0	0	0	0	0	0
snoRNA	ENSMMUG00000037093	1	118873115	118873188	-	0	0	0	0	0	0	0	0	0	0	0	0	0	0	0	0	0	0	0	0	0	0	0	0	0	0	0	0	0	0
snoRNA	ENSMMUG00000033830	1	119253535	119253749	+	0	0	0	0	0	0	0	0	0	0	0	0	0	0	0	0	0	0	0	0	0	0	0	0	0	0	0	0	0	0
snRNA	ENSMMUG00000027659	1	119386943	119387046	-	0	0	0	0	0	0	0	0	0	0	0	0	0	0	0	0	0	0	0	0	0	0	0	0	0	0	0	0	0	0
snoRNA	ENSMMUG00000035912	1	120665016	120665137	-	0	0	0	0	0	0	0	0	0	0	0	0	0	0	0	0	0	0	0	0	0	0	0	0	0	0	0	0	0	0
snoRNA	ENSMMUG00000036927	1	122157559	122157659	+	0	0	0	0	0	0	0	0	0	0	0	0	0	0	0	0	0	0	0	0	0	0	0	0	0	0	0	0	0	0
snRNA	ENSMMUG00000036119	1	122226254	122226402	-	0	0	0	0	0	0	0	0	0	0	0	0	0	0	0	0	0	0	0	0	0	0	0	0	0	0	0	0	0	0
snRNA	ENSMMUG00000025367	1	123050609	123050709	+	0	0	0	0	0	0	0	0	0	0	0	0	0	0	0	0	0	0	0	0	0	0	0	0	0	0	0	0	0	0
tRNA	tRNA-Gln-CTG-11-1	1	124060019	124060091	+	0	0	0	0	0	0	0	0	0	0	0	0	0	0	0	0	0	0	0	0	0	0	0	0	0	0	0	0	0	0
snRNA	ENSMMUG00000027861	1	124950593	124950756	+	12	14	20	10	6	23	13	16	7	9	11	6	10	11	8	16	19	16	10	6	12	8	11	5	20	18	8	22	21	10
snRNA	ENSMMUG00000027383	1	126272256	126272419	-	12	17	19	8	6	25	10	14	6	9	12	6	10	13	9	14	21	15	10	6	13	7	9	5	19	18	7	16	24	8
snRNA	ENSMMUG00000028390	1	126279847	126280010	+	1	1	1	1	0	2	1	0	1	1	1	0	1	1	0	0	1	2	0	0	1	0	0	0	2	1	0	2	3	1
snRNA	ENSMMUG00000027930	1	126306761	126306924	+	13	17	21	9	8	24	11	18	7	11	9	5	11	13	8	15	21	17	10	5	12	7	12	4	19	17	9	16	22	8
snRNA	ENSMMUG00000027495	1	126322838	126323001	+	12	14	19	10	7	23	11	17	8	10	10	4	9	13	10	16	21	20	8	7	11	8	10	5	21	18	8	19	22	9
snRNA	ENSMMUG00000028051	1	126478629	126478753	+	0	0	0	0	0	0	0	0	0	0	0	0	0	0	0	0	0	0	0	0	0	0	0	0	0	0	0	0	0	0
tRNA	tRNA-Glu-CTC-1-1	1	126944318	126944390	+	0	0	0	0	0	0	0	0	0	0	0	0	0	0	0	0	0	0	0	0	0	0	0	0	0	0	0	0	0	0
tRNA	tRNA-Gly-TCC-1-1	1	126945693	126945765	+	0	0	0	0	0	0	0	0	0	0	0	0	0	0	0	0	0	0	0	0	0	0	0	0	0	0	0	0	0	0
tRNA	tRNA-His-GTG-3-1	1	126946643	126946715	+	0	0	0	0	0	0	0	0	0	0	0	0	0	0	0	0	0	0	0	0	0	0	0	0	0	0	0	0	0	0
tRNA	tRNA-Lys-CTT-1-1	1	126947700	126947773	+	0	0	0	0	0	0	0	0	0	0	0	0	0	0	0	0	0	0	0	0	0	0	0	0	0	0	0	0	0	0
tRNA	tRNA-Asn-GTT-16-1	1	126961331	126961406	-	0	0	0	0	0	0	0	0	0	0	0	0	0	0	0	0	0	0	0	0	0	0	0	0	0	0	0	0	0	0
tRNA	tRNA-Asn-GTT-1-1	1	127001394	127001468	+	0	0	0	0	0	0	0	0	0	0	0	0	0	0	0	0	0	0	0	0	0	0	0	0	0	0	0	0	0	0
tRNA	tRNA-Lys-CTT-6-1	1	127015269	127015343	+	0	0	0	0	0	0	0	0	0	0	0	0	0	0	0	0	0	0	0	0	0	0	0	0	0	0	0	0	0	0
tRNA	tRNA-His-GTG-1-1	1	127175153	127175225	+	0	0	0	0	0	0	0	0	0	0	0	0	0	0	0	0	0	0	0	0	0	0	0	0	0	0	0	0	0	0
snRNA	ENSMMUG00000025558	1	127434896	127435056	-	0	0	0	0	0	0	0	0	0	0	0	0	0	0	0	0	0	0	0	0	0	0	0	0	0	0	0	0	0	0
snRNA	ENSMMUG00000027320	1	127519204	127519367	-	2	1	2	1	0	1	0	1	0	1	2	1	0	2	1	1	1	1	1	1	1	0	2	0	2	1	0	2	5	1
snRNA	ENSMMUG00000035876	1	127654657	127654800	-	0	0	0	0	0	0	0	0	0	0	0	0	0	0	0	0	0	0	0	0	0	0	0	0	0	0	0	0	0	0
snRNA	ENSMMUG00000027856	1	127707760	127707923	-	11	15	20	9	7	24	11	17	8	11	10	5	9	14	8	14	21	17	10	6	10	7	10	5	16	18	8	17	24	7
snRNA	ENSMMUG00000036857	1	127720376	127720530	-	0	0	0	0	0	0	0	0	0	0	0	0	0	0	0	0	0	0	0	0	0	0	0	0	0	0	0	0	0	0
snRNA	ENSMMUG00000024186	1	127728711	127728873	-	0	0	0	0	0	0	0	0	0	0	0	0	0	0	0	0	0	0	0	0	0	0	0	0	0	0	0	0	0	0
snRNA	ENSMMUG00000027600	1	127742624	127742787	+	11	14	15	8	5	17	10	13	6	10	12	6	9	13	7	11	20	15	11	5	10	7	10	3	12	16	7	15	22	8
snRNA	ENSMMUG00000027547	1	127745105	127745268	+	13	17	18	9	6	23	10	13	6	10	10	5	12	16	8	17	21	17	11	6	11	7	10	5	17	21	9	18	25	9
snRNA	ENSMMUG00000028134	1	127868688	127868851	-	11	11	14	6	7	18	10	15	5	9	9	5	8	13	8	15	15	15	8	5	10	5	8	5	15	16	9	18	19	8
snRNA	ENSMMUG00000035444	1	127872828	127872999	-	0	0	0	0	0	0	0	0	0	0	0	0	0	0	0	0	0	0	0	0	0	0	0	0	0	0	0	0	0	0
snRNA	ENSMMUG00000028170	1	127881774	127881937	-	11	13	20	10	6	25	11	14	5	10	9	5	8	12	7	13	17	17	8	5	10	9	10	4	17	16	8	17	20	9
snRNA	ENSMMUG00000023889	1	127948724	127948866	-	0	0	0	0	0	0	0	0	0	0	0	0	0	0	0	0	0	0	0	0	0	0	0	0	0	0	0	0	0	0
snRNA	ENSMMUG00000027480	1	128022918	128023081	-	9	17	18	9	7	24	10	15	7	10	11	4	8	14	7	14	20	19	10	6	11	7	10	6	18	15	8	18	23	8
snRNA	ENSMMUG00000025691	1	128071988	128072131	-	0	0	0	0	0	0	0	0	0	0	0	0	0	0	0	0	0	0	0	0	0	0	0	0	0	0	0	0	0	0
tRNA	tRNA-His-GTG-3-2	1	128086669	128086741	-	0	0	0	0	0	0	0	0	0	0	0	0	0	0	0	0	0	0	0	0	0	0	0	0	0	0	0	0	0	0
tRNA	tRNA-Glu-TTC-8-1	1	128092021	128092092	-	0	0	0	0	0	0	0	0	0	0	0	0	0	0	0	0	0	0	0	0	0	0	0	0	0	0	0	0	0	0
tRNA	tRNA-Gln-CTG-2-1	1	128115154	128115226	+	0	0	0	0	0	0	0	0	0	0	0	0	0	0	0	0	0	0	0	0	0	0	0	0	0	0	0	0	0	0
tRNA	tRNA-Asn-ATT-2-1	1	128139562	128139636	-	0	0	0	0	0	0	0	0	0	0	0	0	0	0	0	0	0	0	0	0	0	0	0	0	0	0	0	0	0	0
tRNA	tRNA-Gln-CTG-10-1	1	128188888	128188961	+	0	0	0	0	0	0	0	0	0	0	0	0	0	0	0	0	0	0	0	0	0	0	0	0	0	0	0	0	0	0
tRNA	tRNA-Asn-GTT-20-1	1	128200969	128201043	-	0	0	0	0	0	0	0	0	0	0	0	0	0	0	0	0	0	0	0	0	0	0	0	0	0	0	0	0	0	0
tRNA	tRNA-Asn-GTT-13-1	1	128234557	128234631	+	0	0	0	0	0	0	0	0	0	0	0	0	0	0	0	0	0	0	0	0	0	0	0	0	0	0	0	0	0	0
tRNA	tRNA-Asn-GTT-4-1	1	128244395	128244469	-	0	0	0	0	0	0	0	0	0	0	0	0	0	0	0	0	0	0	0	0	0	0	0	0	0	0	0	0	0	0
tRNA	tRNA-His-GTG-2-1	1	128316175	128316247	-	0	0	0	0	0	0	0	0	0	0	0	0	0	0	0	0	0	0	0	0	0	0	0	0	0	0	0	0	0	0
tRNA	tRNA-Glu-TTC-4-1	1	128322202	128322274	-	0	0	0	0	0	0	0	0	0	0	0	0	0	0	0	0	0	0	0	0	0	0	0	0	0	0	0	0	0	0
tRNA	tRNA-Gln-CTG-3-1	1	128350657	128350729	+	0	0	0	0	0	0	0	0	0	0	0	0	0	0	0	0	0	0	0	0	0	0	0	0	0	0	0	0	0	0
tRNA	tRNA-Asn-GTT-14-1	1	128435812	128435886	-	0	0	0	0	0	0	0	0	0	0	0	0	0	0	0	0	0	0	0	0	0	0	0	0	0	0	0	0	0	0
tRNA	tRNA-Gly-TCC-2-1	1	128438708	128438780	-	0	0	0	0	0	0	0	0	0	0	0	0	0	0	0	0	0	0	0	0	0	0	0	0	0	0	0	0	0	0
tRNA	tRNA-His-GTG-3-3	1	128449207	128449279	-	0	0	0	0	0	0	0	0	0	0	0	0	0	0	0	0	0	0	0	0	0	0	0	0	0	0	0	0	0	0
tRNA	tRNA-Glu-CTC-3-1	1	128454799	128454871	-	0	0	0	0	0	0	0	0	0	0	0	0	0	0	0	0	0	0	0	0	0	0	0	0	0	0	0	0	0	0
tRNA	tRNA-Gln-CTG-4-1	1	128481461	128481533	+	0	0	0	0	0	0	0	0	0	0	0	0	0	0	0	0	0	0	0	0	0	0	0	0	0	0	0	0	0	0
tRNA	tRNA-Asn-GTT-5-1	1	128514618	128514692	-	0	0	0	0	0	0	0	0	0	0	0	0	0	0	0	0	0	0	0	0	0	0	0	0	0	0	0	0	0	0
tRNA	tRNA-Asn-GTT-9-1	1	128555047	128555121	-	0	0	0	0	0	0	0	0	0	0	0	0	0	0	0	0	0	0	0	0	0	0	0	0	0	0	0	0	0	0
tRNA	tRNA-Glu-TTC-3-1	1	128557872	128557944	-	0	0	0	0	0	0	0	0	0	0	0	0	0	0	0	0	0	0	0	0	0	0	0	0	0	0	0	0	0	0
tRNA	tRNA-Gly-CCC-1-2	1	128566065	128566136	-	0	0	0	0	0	0	0	0	0	0	0	0	0	0	0	0	0	0	0	0	0	0	0	0	0	0	0	0	0	0
tRNA	tRNA-Val-CAC-1-1	1	128569986	128570059	-	0	0	0	0	0	0	0	0	0	0	0	0	0	0	0	0	0	0	0	0	0	0	0	0	0	0	0	0	0	0
tRNA	tRNA-Asn-GTT-8-1	1	128599021	128599095	-	0	0	0	0	0	0	0	0	0	0	0	0	0	0	0	0	0	0	0	0	0	0	0	0	0	0	0	0	0	0
snRNA	ENSMMUG00000034447	1	128607292	128607481	+	0	0	0	0	0	0	0	0	0	0	0	0	0	0	0	0	0	0	0	0	0	0	0	0	0	0	0	0	0	0
snoRNA	ENSMMUG00000036868	1	128635384	128635487	+	0	0	0	0	0	0	0	0	0	0	0	0	0	0	0	0	0	0	0	0	0	0	0	0	0	0	0	0	0	0
tRNA	tRNA-Ala-AGC-9-1	1	128890881	128890953	-	0	0	0	0	0	0	0	0	0	0	0	0	0	0	0	0	0	0	0	0	0	0	0	0	0	0	0	0	0	0
snRNA	ENSMMUG00000037397	1	129001346	129001462	-	0	0	0	0	0	0	0	0	0	0	0	0	0	0	0	0	0	0	0	0	0	0	0	0	0	0	0	0	0	0
snRNA	ENSMMUG00000027801	1	129104403	129104509	+	0	0	0	0	0	0	0	0	0	0	0	0	0	0	0	0	0	0	0	0	0	0	0	0	0	0	0	0	0	0
snRNA	ENSMMUG00000024937	1	129216053	129216160	-	0	0	0	0	0	0	0	0	0	0	0	0	0	0	0	0	0	0	0	0	0	0	0	0	0	0	0	0	0	0
snRNA	ENSMMUG00000024243	1	129433285	129433391	-	0	0	0	0	0	0	0	0	0	0	0	0	0	0	0	0	0	0	0	0	0	0	0	0	0	0	0	0	0	0
snoRNA	ENSMMUG00000035742	1	129965969	129966076	-	0	0	0	0	0	0	0	0	0	0	0	0	0	0	0	0	0	0	0	0	0	0	0	0	0	0	0	0	0	0
snRNA	ENSMMUG00000026313	1	130067336	130067442	+	0	0	0	0	0	0	0	0	0	0	0	0	0	0	0	0	0	0	0	0	0	0	0	0	0	0	0	0	0	0
snRNA	ENSMMUG00000033168	1	130194995	130195098	-	0	0	0	0	0	0	0	0	0	0	0	0	0	0	0	0	0	0	0	0	0	0	0	0	0	0	0	0	0	0
snoRNA	ENSMMUG00000036441	1	131513508	131513641	-	0	0	0	0	0	0	0	0	0	0	0	0	0	0	0	0	0	0	0	0	0	0	0	0	0	0	0	0	0	0
snRNA	ENSMMUG00000024888	1	131859866	131859972	+	0	0	0	0	0	0	0	0	0	0	0	0	0	0	0	0	0	0	0	0	0	0	0	0	0	0	0	0	0	0
snoRNA	ENSMMUG00000036634	1	132266012	132266115	-	0	0	0	0	0	0	0	0	0	0	0	0	0	0	0	0	0	0	0	0	0	0	0	0	0	0	0	0	0	0
snoRNA	ENSMMUG00000036896	1	132515006	132515114	-	0	0	0	0	0	0	0	0	0	0	0	0	0	0	0	0	0	0	0	0	0	0	0	0	0	0	0	0	0	0
snRNA	ENSMMUG00000028290	1	132555325	132555431	-	0	0	0	0	0	0	0	0	0	0	0	0	0	0	0	0	0	0	0	0	0	0	0	0	0	0	0	0	0	0
tRNA	tRNA-iMet-CAT-1-1	1	132668489	132668561	+	0	0	0	0	0	0	0	0	0	0	0	0	0	0	0	0	0	0	0	0	0	0	0	0	0	0	0	0	0	0
snoRNA	ENSMMUG00000025046	1	132788018	132788153	+	0	0	0	0	0	0	0	0	0	0	0	0	0	0	0	0	0	0	0	0	0	0	0	0	0	0	0	0	0	0
snoRNA	ENSMMUG00000026730	1	132816209	132816279	+	0	0	0	0	0	0	0	0	0	0	0	0	0	0	0	0	0	0	0	0	0	0	0	0	0	0	0	0	0	0
snRNA	ENSMMUG00000035851	1	132876048	132876107	+	0	0	0	0	0	0	0	0	0	0	0	0	0	0	0	0	0	0	0	0	0	0	0	0	0	0	0	0	0	0
snoRNA	ENSMMUG00000028380	1	133623033	133623166	-	0	0	0	0	0	0	0	0	0	0	0	0	0	0	0	0	0	0	0	0	0	0	0	0	0	0	0	0	0	0
snRNA	ENSMMUG00000036922	1	133692917	133692978	+	0	0	0	0	0	0	0	0	0	0	0	0	0	0	0	0	0	0	0	0	0	0	0	0	0	0	0	0	0	0
snRNA	ENSMMUG00000025681	1	133924485	133924591	-	0	0	0	0	0	0	0	0	0	0	0	0	0	0	0	0	0	0	0	0	0	0	0	0	0	0	0	0	0	0
snoRNA	ENSMMUG00000037210	1	133975226	133975328	-	0	0	0	0	0	0	0	0	0	0	0	0	0	0	0	0	0	0	0	0	0	0	0	0	0	0	0	0	0	0
snRNA	ENSMMUG00000027626	1	133979014	133979117	+	0	0	0	0	0	0	0	0	0	0	0	0	0	0	0	0	0	0	0	0	0	0	0	0	0	0	0	0	0	0
snRNA	ENSMMUG00000026744	1	134143252	134143355	+	0	0	0	0	0	0	0	0	0	0	0	0	0	0	0	0	0	0	0	0	0	0	0	0	0	0	0	0	0	0
snRNA	ENSMMUG00000036827	1	134466334	134466439	+	0	0	0	0	0	0	0	0	0	0	0	0	0	0	0	0	0	0	0	0	0	0	0	0	0	0	0	0	0	0
snoRNA	ENSMMUG00000027793	1	134493145	134493281	-	0	0	0	0	0	0	0	0	0	0	0	0	0	0	0	0	0	0	0	0	0	0	0	0	0	0	0	0	0	0
snoRNA	ENSMMUG00000035976	1	134500257	134500384	-	1	0	1	0	0	1	0	0	0	0	0	0	0	0	0	0	1	0	0	0	0	0	0	0	0	0	0	0	0	0
snoRNA	ENSMMUG00000036268	1	134791853	134791938	-	0	0	0	0	0	0	0	0	0	0	0	0	0	0	0	0	0	0	0	0	0	0	0	0	0	0	0	0	0	0
snoRNA	ENSMMUG00000035883	1	135138324	135138423	+	0	0	0	0	0	0	0	0	0	0	0	0	0	0	0	0	0	0	0	0	0	0	0	0	0	0	0	0	0	0
tRNA	tRNA-Arg-TCT-3-1	1	138250387	138250461	-	0	0	0	0	0	0	0	0	0	0	0	0	0	0	0	0	0	0	0	0	0	0	0	0	0	0	0	0	0	0
snoRNA	ENSMMUG00000032897	1	138465415	138465481	-	0	0	0	0	0	0	0	0	0	0	0	0	0	0	0	0	0	0	0	0	0	0	0	0	0	0	0	0	0	0
snRNA	ENSMMUG00000027901	1	139010806	139010947	-	0	0	0	0	0	0	0	0	0	0	0	0	0	0	0	0	0	0	0	0	0	0	0	0	0	0	0	0	0	0
snRNA	ENSMMUG00000027636	1	140006744	140006850	+	0	0	0	0	0	0	0	0	0	0	0	0	0	0	0	0	0	0	0	0	0	0	0	0	0	0	0	0	0	0
tRNA	tRNA-Val-CAC-1-2	1	140547240	140547313	-	0	0	0	0	0	0	0	0	0	0	0	0	0	0	0	0	0	0	0	0	0	0	0	0	0	0	0	0	0	0
tRNA	tRNA-Glu-TTC-5-1	1	140569866	140569938	-	0	0	0	0	0	0	0	0	0	0	0	0	0	0	0	0	0	0	0	0	0	0	0	0	0	0	0	0	0	0
tRNA	tRNA-Asn-GTT-6-1	1	140573579	140573653	-	0	0	0	0	0	0	0	0	0	0	0	0	0	0	0	0	0	0	0	0	0	0	0	0	0	0	0	0	0	0
tRNA	tRNA-Gly-TCC-3-1	1	140582728	140582800	+	0	0	0	0	0	0	0	0	0	0	0	0	0	0	0	0	0	0	0	0	0	0	0	0	0	0	0	0	0	0
tRNA	tRNA-Asp-GTC-1-1	1	140585535	140585607	-	0	0	0	0	0	0	0	0	0	0	0	0	0	0	0	0	0	0	0	0	0	0	0	0	0	0	0	0	0	0
tRNA	tRNA-Leu-CAG-1-1	1	140587210	140587293	+	0	0	0	0	0	0	0	0	0	0	0	0	0	0	0	0	0	0	0	0	0	0	0	0	0	0	0	0	0	0
tRNA	tRNA-Gly-GCC-1-1	1	140588964	140589035	+	0	0	0	0	0	0	0	0	0	0	0	0	0	0	0	0	0	0	0	0	0	0	0	0	0	0	0	0	0	0
tRNA	tRNA-Gly-GCC-2-1	1	140634743	140634814	-	0	0	0	0	0	0	0	0	0	0	0	0	0	0	0	0	0	0	0	0	0	0	0	0	0	0	0	0	0	0
tRNA	tRNA-Leu-CAG-3-1	1	140641430	140641513	-	0	0	0	0	0	0	0	0	0	0	0	0	0	0	0	0	0	0	0	0	0	0	0	0	0	0	0	0	0	0
tRNA	tRNA-Gly-TCC-1-2	1	140642210	140642282	+	0	0	0	0	0	0	0	0	0	0	0	0	0	0	0	0	0	0	0	0	0	0	0	0	0	0	0	0	0	0
tRNA	tRNA-Asp-GTC-4-1	1	140643172	140643244	+	0	0	0	0	0	0	0	0	0	0	0	0	0	0	0	0	0	0	0	0	0	0	0	0	0	0	0	0	0	0
tRNA	tRNA-Asn-GTT-2-1	1	140651722	140651796	+	0	0	0	0	0	0	0	0	0	0	0	0	0	0	0	0	0	0	0	0	0	0	0	0	0	0	0	0	0	0
snoRNA	ENSMMUG00000033058	1	142926995	142927124	+	0	0	0	0	0	0	0	0	0	0	0	0	0	0	0	0	0	0	0	0	0	0	0	0	0	0	0	0	0	0
snoRNA	ENSMMUG00000036964	1	144055687	144055790	+	0	0	0	0	0	0	0	0	0	0	0	0	0	0	0	0	0	0	0	0	0	0	0	0	0	0	0	0	0	0
snoRNA	ENSMMUG00000037421	1	144069008	144069107	-	0	0	0	0	0	0	0	0	0	0	0	0	0	0	0	0	0	0	0	0	0	0	0	0	0	0	0	0	0	0
snRNA	ENSMMUG00000034851	1	144653602	144653704	-	0	0	0	0	0	0	0	0	0	0	0	0	0	0	0	0	0	0	0	0	0	0	0	0	0	0	0	0	0	0
snoRNA	ENSMMUG00000035532	1	146155323	146155421	-	0	0	0	0	0	0	0	0	0	0	0	0	0	0	0	0	0	0	0	0	0	0	0	0	0	0	0	0	0	0
snRNA	ENSMMUG00000027811	1	146187388	146187494	-	0	0	0	0	0	0	0	0	0	0	0	0	0	0	0	0	0	0	0	0	0	0	0	0	0	0	0	0	0	0
snRNA	ENSMMUG00000035875	1	146641168	146641231	-	0	0	0	0	0	0	0	0	0	0	0	0	0	0	0	0	0	0	0	0	0	0	0	0	0	0	0	0	0	0
snRNA	ENSMMUG00000036057	1	146881427	146881530	-	0	0	0	0	0	0	0	0	0	0	0	0	0	0	0	0	0	0	0	0	0	0	0	0	0	0	0	0	0	0
snoRNA	ENSMMUG00000037012	1	147353183	147353286	+	0	0	0	0	0	0	0	0	0	0	0	0	0	0	0	0	0	0	0	0	0	0	0	0	0	0	0	0	0	0
tRNA	tRNA-Thr-TGT-1-1	1	148324250	148324323	-	0	0	0	0	0	0	0	0	0	0	0	0	0	0	0	0	0	0	0	0	0	0	0	0	0	0	0	0	0	0
snRNA	ENSMMUG00000025161	1	148424182	148424285	+	0	0	0	0	0	0	0	0	0	0	0	0	0	0	0	0	0	0	0	0	0	0	0	0	0	0	0	0	0	0
snRNA	ENSMMUG00000033899	1	149493789	149493903	-	0	0	0	0	0	0	0	0	0	0	0	0	0	0	0	0	0	0	0	0	0	0	0	0	0	0	0	0	0	0
snoRNA	ENSMMUG00000034621	1	150162057	150162187	+	0	0	0	0	0	0	0	0	0	0	0	0	0	0	0	0	0	0	0	0	0	0	0	0	0	0	0	0	0	0
snoRNA	ENSMMUG00000036480	1	150225223	150225325	-	0	0	0	0	0	0	0	0	0	0	0	0	0	0	0	0	0	0	0	0	0	0	0	0	0	0	0	0	0	0
snoRNA	ENSMMUG00000036657	1	150399627	150399730	+	0	0	0	0	0	0	0	0	0	0	0	0	0	0	0	0	0	0	0	0	0	0	0	0	0	0	0	0	0	0
snoRNA	ENSMMUG00000032746	1	150426467	150426641	-	0	0	0	0	0	0	0	0	0	0	0	0	0	0	0	0	0	0	0	0	0	0	0	0	0	0	0	0	0	0
snoRNA	ENSMMUG00000033539	1	151880167	151880375	+	0	0	0	0	0	0	0	0	0	0	0	0	0	0	0	0	0	0	0	0	0	0	0	0	0	0	0	0	0	0
snRNA	ENSMMUG00000024597	1	152301019	152301179	-	0	0	0	0	0	0	0	0	0	0	0	0	0	0	0	0	0	0	0	0	0	0	0	0	0	0	0	0	0	0
snoRNA	ENSMMUG00000033018	1	154792307	154792391	+	0	0	0	0	0	0	0	0	0	0	0	0	0	0	0	0	0	0	0	0	0	0	0	0	0	0	0	0	0	0
snoRNA	ENSMMUG00000037357	1	157702137	157702208	+	0	0	0	0	0	0	0	0	0	0	0	0	0	0	0	0	0	0	0	0	0	0	0	0	0	0	0	0	0	0
snoRNA	ENSMMUG00000026424	1	158051373	158051507	-	0	0	0	0	0	0	0	0	0	0	0	0	0	0	0	0	0	0	0	0	0	0	0	0	0	0	0	0	0	0
snoRNA	ENSMMUG00000033178	1	158384784	158384903	-	0	0	0	0	0	0	0	0	0	0	0	0	0	0	0	0	0	0	0	0	0	0	0	0	0	0	0	0	0	0
snRNA	ENSMMUG00000027412	1	160029781	160029892	+	0	0	0	0	0	0	0	0	0	0	0	0	0	0	0	0	0	0	0	0	0	0	0	0	0	0	0	0	0	0
snoRNA	ENSMMUG00000036140	1	163319151	163319225	+	0	0	0	0	0	0	0	0	0	0	0	0	0	0	0	0	0	0	0	0	0	0	0	0	0	0	0	0	0	0
snoRNA	ENSMMUG00000037319	1	163681104	163681176	-	0	0	0	0	0	0	0	0	0	0	0	0	0	0	0	0	0	0	0	0	0	0	0	0	0	0	0	0	0	0
tRNA	tRNA-Pro-TGG-7-1	1	163940372	163940451	+	0	0	0	0	0	0	0	0	0	0	0	0	0	0	0	0	0	0	0	0	0	0	0	0	0	0	0	0	0	0
snoRNA	ENSMMUG00000032777	1	164271949	164272034	-	0	0	0	0	0	0	0	0	0	0	0	0	0	0	0	0	0	0	0	0	0	0	0	0	0	0	0	0	0	0
snoRNA	ENSMMUG00000026143	1	164683743	164683871	+	0	0	0	0	0	0	0	0	0	0	0	0	0	0	0	0	0	0	0	0	0	0	0	0	0	0	0	0	0	0
snRNA	ENSMMUG00000026731	1	164819148	164819254	-	0	0	0	0	0	0	0	0	0	0	0	0	0	0	0	0	0	0	0	0	0	0	0	0	0	0	0	0	0	0
tRNA	tRNA-Lys-TTT-10-1	1	165513122	165513193	-	0	0	0	0	0	0	0	0	0	0	0	0	0	0	0	0	0	0	0	0	0	0	0	0	0	0	0	0	0	0
snoRNA	ENSMMUG00000036165	1	165520357	165520428	+	0	0	0	0	0	0	0	0	0	0	0	0	0	0	0	0	0	0	0	0	0	0	0	0	0	0	0	0	0	0
snoRNA	ENSMMUG00000036962	1	165699009	165699146	-	0	0	0	0	0	0	0	0	0	0	0	0	0	0	0	0	0	0	0	0	0	0	0	0	0	0	0	0	0	0
tRNA	tRNA-Lys-TTT-1-1	1	166498719	166498792	+	0	0	0	0	0	0	0	0	0	0	0	0	0	0	0	0	0	0	0	0	0	0	0	0	0	0	0	0	0	0
tRNA	tRNA-Lys-TTT-1-2	1	166499215	166499288	-	0	0	0	0	0	0	0	0	0	0	0	0	0	0	0	0	0	0	0	0	0	0	0	0	0	0	0	0	0	0
snoRNA	ENSMMUG00000033542	1	166696788	166696912	-	0	0	0	0	0	0	0	0	0	0	0	0	0	0	0	0	0	0	0	0	0	0	0	0	0	0	0	0	0	0
snRNA	ENSMMUG00000028337	1	167106726	167106829	+	0	0	0	0	0	0	0	0	0	0	0	0	0	0	0	0	0	0	0	0	0	0	0	0	0	0	0	0	0	0
snoRNA	ENSMMUG00000036194	1	167975981	167976098	+	0	0	0	0	0	0	0	0	0	0	0	0	0	0	0	0	0	0	0	0	0	0	0	0	0	0	0	0	0	0
snRNA	ENSMMUG00000024306	1	168090101	168090204	+	0	0	0	0	0	0	0	0	0	0	0	0	0	0	0	0	0	0	0	0	0	0	0	0	0	0	0	0	0	0
snoRNA	ENSMMUG00000037013	1	168267961	168268061	-	0	0	0	0	0	0	0	0	0	0	0	0	0	0	0	0	0	0	0	0	0	0	0	0	0	0	0	0	0	0
snoRNA	ENSMMUG00000036986	1	168300616	168300719	+	0	0	0	0	0	0	0	0	0	0	0	0	0	0	0	0	0	0	0	0	0	0	0	0	0	0	0	0	0	0
snoRNA	ENSMMUG00000025468	1	168510475	168510608	-	0	0	0	0	0	0	0	0	0	0	0	0	0	0	0	0	0	0	0	0	0	0	0	0	0	0	0	0	0	0
snRNA	ENSMMUG00000025310	1	168761844	168761950	-	0	0	0	0	0	0	0	0	0	0	0	0	0	0	0	0	0	0	0	0	0	0	0	0	0	0	0	0	0	0
snRNA	ENSMMUG00000026793	1	169561378	169561480	+	0	0	0	0	0	0	0	0	0	0	0	0	0	0	0	0	0	0	0	0	0	0	0	0	0	0	0	0	0	0
snRNA	ENSMMUG00000035331	1	170434337	170434441	-	0	0	0	0	0	0	0	0	0	0	0	0	0	0	0	0	0	0	0	0	0	0	0	0	0	0	0	0	0	0
snRNA	ENSMMUG00000028362	1	170473795	170473901	+	0	0	0	0	0	0	0	0	0	0	0	0	0	0	0	0	0	0	0	0	0	0	0	0	0	0	0	0	0	0
snoRNA	ENSMMUG00000036028	1	170593084	170593224	+	0	0	0	0	0	0	0	0	0	0	0	0	0	0	0	0	0	0	0	0	0	0	0	0	0	0	0	0	0	0
snRNA	ENSMMUG00000036108	1	170608766	170608851	-	0	0	0	0	0	0	0	0	0	0	0	0	0	0	0	0	0	0	0	0	0	0	0	0	0	0	0	0	0	0
snRNA	ENSMMUG00000027323	1	173291872	173291978	+	0	0	0	0	0	0	0	0	0	0	0	0	0	0	0	0	0	0	0	0	0	0	0	0	0	0	0	0	0	0
tRNA	tRNA-Lys-TTT-1-3	1	174729404	174729477	-	0	0	0	0	0	0	0	0	0	0	0	0	0	0	0	0	0	0	0	0	0	0	0	0	0	0	0	0	0	0
snRNA	ENSMMUG00000037081	1	176097320	176097419	+	0	0	0	0	0	0	0	0	0	0	0	0	0	0	0	0	0	0	0	0	0	0	0	0	0	0	0	0	0	0
snoRNA	ENSMMUG00000036297	1	176870191	176870304	+	0	0	0	0	0	0	0	0	0	0	0	0	0	0	0	0	0	0	0	0	0	0	0	0	0	0	0	0	0	0
snoRNA	ENSMMUG00000036486	1	177540365	177540499	+	0	0	0	0	0	0	0	0	0	0	0	0	0	0	0	0	0	0	0	0	0	0	0	0	0	0	0	0	0	0
snRNA	ENSMMUG00000027509	1	181619079	181619185	+	0	0	0	0	0	0	0	0	0	0	0	0	0	0	0	0	0	0	0	0	0	0	0	0	0	0	0	0	0	0
snRNA	ENSMMUG00000025232	1	184414910	184415013	+	0	0	0	0	0	0	0	0	0	0	0	0	0	0	0	0	0	0	0	0	0	0	0	0	0	0	0	0	0	0
snoRNA	ENSMMUG00000037434	1	184996985	184997056	-	0	0	0	0	0	0	0	0	0	0	0	0	0	0	0	0	0	0	0	0	0	0	0	0	0	0	0	0	0	0
snRNA	ENSMMUG00000037060	1	185274974	185275035	-	0	0	0	0	0	0	0	0	0	0	0	0	0	0	0	0	0	0	0	0	0	0	0	0	0	0	0	0	0	0
snRNA	ENSMMUG00000025765	1	188343351	188343457	-	0	0	0	0	0	0	0	0	0	0	0	0	0	0	0	0	0	0	0	0	0	0	0	0	0	0	0	0	0	0
snRNA	ENSMMUG00000036230	1	191156594	191156676	-	0	0	0	0	0	0	0	0	0	0	0	0	0	0	0	0	0	0	0	0	0	0	0	0	0	0	0	0	0	0
snoRNA	ENSMMUG00000037240	1	191961058	191961176	+	0	0	0	0	0	0	0	0	0	0	0	0	0	0	0	0	0	0	0	0	0	0	0	0	0	0	0	0	0	0
snoRNA	ENSMMUG00000036625	1	193294528	193294599	+	0	0	0	0	0	0	0	0	0	0	0	0	0	0	0	0	0	0	0	0	0	0	0	0	0	0	0	0	0	0
snRNA	ENSMMUG00000026478	1	194196704	194196821	+	0	0	0	0	0	0	0	0	0	0	0	0	0	0	0	0	0	0	0	0	0	0	0	0	0	0	0	0	0	0
snRNA	ENSMMUG00000033268	1	194493251	194493357	+	0	0	0	0	0	0	0	0	0	0	0	0	0	0	0	0	0	0	0	0	0	0	0	0	0	0	0	0	0	0
snRNA	ENSMMUG00000035555	1	194819952	194820035	-	0	0	0	0	0	0	0	0	0	0	0	0	0	0	0	0	0	0	0	0	0	0	0	0	0	0	0	0	0	0
snoRNA	ENSMMUG00000036767	1	194910660	194910731	-	0	0	0	0	0	0	0	0	0	0	0	0	0	0	0	0	0	0	0	0	0	0	0	0	0	0	0	0	0	0
tRNA	tRNA-Lys-CTT-5-1	1	196092921	196092994	+	0	0	0	0	0	0	0	0	0	0	0	0	0	0	0	0	0	0	0	0	0	0	0	0	0	0	0	0	0	0
snoRNA	ENSMMUG00000036659	1	196759726	196759826	+	0	0	0	0	0	0	0	0	0	0	0	0	0	0	0	0	0	0	0	0	0	0	0	0	0	0	0	0	0	0
snRNA	ENSMMUG00000025878	1	197988805	197988907	-	0	0	0	0	0	0	0	0	0	0	0	0	0	0	0	0	0	0	0	0	0	0	0	0	0	0	0	0	0	0
tRNA	tRNA-Pro-CGG-1-1	1	198129468	198129540	+	0	0	0	0	0	0	0	0	0	0	0	0	0	0	0	0	0	0	0	0	0	0	0	0	0	0	0	0	0	0
tRNA	tRNA-Pro-TGG-2-1	1	198130178	198130250	-	0	0	0	0	0	0	0	0	0	0	0	0	0	0	0	0	0	0	0	0	0	0	0	0	0	0	0	0	0	0
snoRNA	ENSMMUG00000035741	1	201195695	201195797	+	0	0	0	0	0	0	0	0	0	0	0	0	0	0	0	0	0	0	0	0	0	0	0	0	0	0	0	0	0	0
snRNA	ENSMMUG00000035725	1	201231988	201232085	-	0	0	0	0	0	0	0	0	0	0	0	0	0	0	0	0	0	0	0	0	0	0	0	0	0	0	0	0	0	0
snoRNA	ENSMMUG00000035909	1	201457087	201457192	+	0	0	0	0	0	0	0	0	0	0	0	0	0	0	0	0	0	0	0	0	0	0	0	0	0	0	0	0	0	0
snoRNA	ENSMMUG00000036173	1	202038426	202038492	+	0	0	0	0	0	0	0	0	0	0	0	0	0	0	0	0	0	0	0	0	0	0	0	0	0	0	0	0	0	0
snRNA	ENSMMUG00000024062	1	202056960	202057066	+	0	0	0	0	0	0	0	0	0	0	0	0	0	0	0	0	0	0	0	0	0	0	0	0	0	0	0	0	0	0
snRNA	ENSMMUG00000036303	1	202312306	202312410	-	0	0	0	0	0	0	0	0	0	0	0	0	0	0	0	0	0	0	0	0	0	0	0	0	0	0	0	0	0	0
tRNA	tRNA-Glu-TTC-10-1	1	202560763	202560828	-	0	0	0	0	0	0	0	0	0	0	0	0	0	0	0	0	0	0	0	0	0	0	0	0	0	0	0	0	0	0
snoRNA	ENSMMUG00000036014	1	202966308	202966401	+	0	0	0	0	0	0	0	0	0	0	0	0	0	0	0	0	0	0	0	0	0	0	0	0	0	0	0	0	0	0
snoRNA	ENSMMUG00000037401	1	203308906	203309009	-	0	0	0	0	0	0	0	0	0	0	0	0	0	0	0	0	0	0	0	0	0	0	0	0	0	0	0	0	0	0
snoRNA	ENSMMUG00000024846	1	203504567	203504643	-	81	145	166	75	168	128	221	111	276	151	95	283	75	99	39	91	97	78	146	117	384	39	163	87	82	98	79	132	172	110
snoRNA	ENSMMUG00000025611	1	203504791	203504867	-	1	2	2	1	1	2	3	0	5	4	2	8	2	0	0	2	6	1	9	3	17	0	5	6	5	6	5	4	4	6
snoRNA	ENSMMUG00000025832	1	203505247	203505328	-	5	9	11	4	7	9	11	7	15	21	18	12	8	9	4	5	9	5	10	5	22	3	11	6	11	11	11	5	9	11
snoRNA	ENSMMUG00000024242	1	203505778	203505860	-	0	0	0	0	0	0	0	0	0	0	0	0	0	0	0	1	0	0	1	0	2	0	0	0	0	0	0	0	0	0
snoRNA	ENSMMUG00000032901	1	203506279	203506344	-	0	2	1	0	2	1	3	1	3	2	1	3	0	0	0	1	1	0	2	1	4	0	2	1	1	1	1	2	1	1
snoRNA	ENSMMUG00000033304	1	203506599	203506659	-	1	2	2	1	2	2	4	0	6	3	1	7	3	1	0	2	3	1	6	5	15	0	6	3	2	2	4	4	5	3
snoRNA	ENSMMUG00000032962	1	203506937	203507008	-	1	2	1	1	2	0	2	0	4	1	1	4	1	0	0	2	1	0	4	3	6	0	5	1	1	1	1	2	2	3
snoRNA	ENSMMUG00000025361	1	203507268	203507349	-	9	15	21	8	11	10	24	9	33	25	12	39	9	7	5	11	17	8	34	19	76	2	22	12	12	17	14	17	29	16
snoRNA	ENSMMUG00000026229	1	203508561	203508640	-	41	72	90	29	51	56	99	52	127	100	62	124	38	32	20	48	58	34	98	69	184	18	101	75	82	94	48	32	43	78
snRNA	ENSMMUG00000037265	1	203740153	203740214	-	0	0	0	0	0	0	0	0	0	0	0	0	0	0	0	0	0	0	0	0	0	0	0	0	0	0	0	0	0	0
snoRNA	ENSMMUG00000035827	1	203849152	203849253	-	0	0	0	0	0	0	0	0	0	0	0	0	0	0	0	0	0	0	0	0	0	0	0	0	0	0	0	0	0	0
snRNA	ENSMMUG00000035170	1	204606572	204606677	+	0	0	0	0	0	0	0	0	0	0	0	0	0	0	0	0	0	0	0	0	0	0	0	0	0	0	0	0	0	0
snRNA	ENSMMUG00000024417	1	204625131	204625233	+	0	0	0	0	0	0	0	0	0	0	0	0	0	0	0	0	0	0	0	0	0	0	0	0	0	0	0	0	0	0
snoRNA	ENSMMUG00000036503	1	205580545	205580687	-	165	142	196	145	103	156	142	226	122	219	246	131	199	307	415	186	150	303	262	138	171	221	215	183	219	213	269	218	223	240
snRNA	ENSMMUG00000036181	1	207776630	207776732	+	0	0	0	0	0	0	0	0	0	0	0	0	0	0	0	0	0	0	0	0	0	0	0	0	0	0	0	0	0	0
tRNA	tRNA-Glu-CTC-1-2	1	209271843	209271915	-	0	0	0	0	0	0	0	0	0	0	0	0	0	0	0	0	0	0	0	0	0	0	0	0	0	0	0	0	0	0
tRNA	tRNA-Leu-CAA-3-1	1	209272195	209272301	-	0	0	0	0	0	0	0	0	0	0	0	0	0	0	0	0	0	0	0	0	0	0	0	0	0	0	0	0	0	0
snoRNA	ENSMMUG00000035787	1	210160919	210160999	+	0	0	0	0	0	0	0	0	0	0	0	0	0	0	0	0	0	0	0	0	0	0	0	0	0	0	0	0	0	0
snoRNA	ENSMMUG00000035698	1	210184737	210184801	-	0	0	0	0	0	0	0	0	0	0	0	0	0	0	0	0	0	0	0	0	0	0	0	0	0	0	0	0	0	0
snRNA	ENSMMUG00000024556	1	210831253	210831357	+	0	0	0	0	0	0	0	0	0	0	0	0	0	0	0	0	0	0	0	0	0	0	0	0	0	0	0	0	0	0
snRNA	ENSMMUG00000027317	1	211919502	211919665	+	0	0	0	0	0	0	0	0	0	0	0	0	0	0	0	0	0	0	0	0	0	0	0	0	0	0	0	0	0	0
snRNA	ENSMMUG00000036930	1	212006837	212006941	-	0	0	0	0	0	0	0	0	0	0	0	0	0	0	0	0	0	0	0	0	0	0	0	0	0	0	0	0	0	0
snRNA	ENSMMUG00000025799	1	212028860	212028966	-	0	0	0	0	0	0	0	0	0	0	0	0	0	0	0	0	0	0	0	0	0	0	0	0	0	0	0	0	0	0
snRNA	ENSMMUG00000036090	1	212109631	212109730	-	0	0	0	0	0	0	0	0	0	0	0	0	0	0	0	0	0	0	0	0	0	0	0	0	0	0	0	0	0	0
snRNA	ENSMMUG00000035346	1	215017423	215017528	+	0	0	0	0	0	0	0	0	0	0	0	0	0	0	0	0	0	0	0	0	0	0	0	0	0	0	0	0	0	0
snoRNA	ENSMMUG00000036260	1	219493107	219493224	+	0	0	0	0	0	0	0	0	0	0	0	0	0	0	0	0	0	0	0	0	0	0	0	0	0	0	0	0	0	0
tRNA	tRNA-Asn-GTT-21-1	1	220273108	220273181	-	0	0	0	0	0	0	0	0	0	0	0	0	0	0	0	0	0	0	0	0	0	0	0	0	0	0	0	0	0	0
snoRNA	ENSMMUG00000036920	1	220705403	220705474	-	0	0	0	0	0	0	0	0	0	0	0	0	0	0	0	0	0	0	0	0	0	0	0	0	0	0	0	0	0	0
snRNA	ENSMMUG00000034442	1	220743562	220743751	-	5	5	4	5	2	11	3	5	3	5	3	2	3	5	2	4	8	5	5	5	4	5	4	4	6	7	4	7	14	4
snRNA	ENSMMUG00000024770	1	221100633	221100734	-	0	0	0	0	0	0	0	0	0	0	0	0	0	0	0	0	0	0	0	0	0	0	0	0	0	0	0	0	0	0
snRNA	ENSMMUG00000035602	1	221154043	221154092	+	0	0	0	0	0	0	0	0	0	0	0	0	0	0	0	0	0	0	0	0	0	0	0	0	0	0	0	0	0	0
snoRNA	ENSMMUG00000025132	1	221890821	221890955	+	3	8	8	3	8	5	7	4	9	9	8	8	3	4	2	3	5	2	6	4	10	2	4	2	6	6	9	6	7	10
snoRNA	ENSMMUG00000026044	1	222438083	222438211	-	0	0	0	0	0	0	0	0	0	0	0	0	0	0	0	0	0	0	0	0	0	0	0	0	0	0	0	0	0	0
snRNA	ENSMMUG00000035050	1	223548351	223548504	+	0	0	0	0	0	0	0	0	0	0	0	0	0	0	0	0	0	0	0	0	0	0	0	0	0	0	0	0	0	0
snRNA	ENSMMUG00000028489	1	224155614	224155775	+	0	0	0	0	0	0	0	0	0	0	0	0	0	0	0	0	0	0	0	0	0	0	0	0	0	0	0	0	0	0
snRNA	ENSMMUG00000035247	1	224276485	224276589	-	0	0	0	0	0	0	0	0	0	0	0	0	0	0	0	0	0	0	0	0	0	0	0	0	0	0	0	0	0	0
snRNA	ENSMMUG00000035717	1	225271744	225271812	+	0	0	0	0	0	0	0	0	0	0	0	0	0	0	0	0	0	0	0	0	0	0	0	0	0	0	0	0	0	0
snoRNA	ENSMMUG00000035505	1	226064747	226064856	+	0	0	0	0	0	0	0	0	0	0	0	0	0	0	0	0	0	0	0	0	0	0	0	0	0	0	0	0	0	0
snRNA	ENSMMUG00000037337	1	226896606	226896664	+	0	0	0	0	0	0	0	0	0	0	0	0	0	0	0	0	0	0	0	0	0	0	0	0	0	0	0	0	0	0
snRNA	ENSMMUG00000027472	1	227418764	227418915	+	0	0	0	0	0	0	0	0	0	0	0	0	0	0	0	0	0	0	0	0	0	0	0	0	0	0	0	0	0	0
snRNA	ENSMMUG00000034669	2	1566755	1566859	+	0	0	0	0	0	0	0	0	0	0	0	0	0	0	0	0	0	0	0	0	0	0	0	0	0	0	0	0	0	0
snRNA	ENSMMUG00000037276	2	8407668	8407720	-	0	0	0	0	0	0	0	0	0	0	0	0	0	0	0	0	0	0	0	0	0	0	0	0	0	0	0	0	0	0
tRNA	tRNA-Lys-TTT-13-1	2	9329657	9329711	+	0	0	0	0	0	0	0	0	0	0	0	0	0	0	0	0	0	0	0	0	0	0	0	0	0	0	0	0	0	0
snoRNA	ENSMMUG00000026335	2	10393975	10394047	+	0	0	0	0	0	0	0	0	0	0	0	0	0	0	0	0	0	0	0	0	0	0	0	0	0	0	0	0	0	0
snRNA	ENSMMUG00000036386	2	10507873	10507974	+	0	0	0	0	0	0	0	0	0	0	0	0	0	0	0	0	0	0	0	0	0	0	0	0	0	0	0	0	0	0
tRNA	tRNA-Lys-CTT-7-1	2	10613031	10613107	-	0	0	0	0	0	0	0	0	0	0	0	0	0	0	0	0	0	0	0	0	0	0	0	0	0	0	0	0	0	0
snRNA	ENSMMUG00000024639	2	11983870	11983976	-	0	0	0	0	0	0	0	0	0	0	0	0	0	0	0	0	0	0	0	0	0	0	0	0	0	0	0	0	0	0
snRNA	ENSMMUG00000033738	2	12152328	12152453	+	0	0	0	0	0	0	0	0	0	0	0	0	0	0	0	0	0	0	0	0	0	0	0	0	0	0	0	0	0	0
snRNA	ENSMMUG00000035620	2	12740479	12740584	-	0	0	0	0	0	0	0	0	0	0	0	0	0	0	0	0	0	0	0	0	0	0	0	0	0	0	0	0	0	0
tRNA	tRNA-Ser-TGA-10-1	2	13656380	13656449	+	0	0	0	0	0	0	0	0	0	0	0	0	0	0	0	0	0	0	0	0	0	0	0	0	0	0	0	0	0	0
snoRNA	ENSMMUG00000033250	2	14174282	14174493	+	0	0	0	0	0	0	0	0	0	0	0	0	0	0	0	0	0	0	0	0	0	0	0	0	0	0	0	0	0	0
snRNA	ENSMMUG00000034821	2	14310348	14310446	+	0	0	0	0	0	0	0	0	0	0	0	0	0	0	0	0	0	0	0	0	0	0	0	0	0	0	0	0	0	0
snRNA	ENSMMUG00000024927	2	14439245	14439351	+	0	0	0	0	0	0	0	0	0	0	0	0	0	0	0	0	0	0	0	0	0	0	0	0	0	0	0	0	0	0
snRNA	ENSMMUG00000035559	2	14556615	14556674	-	0	0	0	0	0	0	0	0	0	0	0	0	0	0	0	0	0	0	0	0	0	0	0	0	0	0	0	0	0	0
snRNA	ENSMMUG00000027980	2	17010923	17011029	-	0	0	0	0	0	0	0	0	0	0	0	0	0	0	0	0	0	0	0	0	0	0	0	0	0	0	0	0	0	0
snRNA	ENSMMUG00000028046	2	19088440	19088545	+	0	0	0	0	0	0	0	0	0	0	0	0	0	0	0	0	0	0	0	0	0	0	0	0	0	0	0	0	0	0
snRNA	ENSMMUG00000035948	2	19166728	19166789	+	0	0	0	0	0	0	0	0	0	0	0	0	0	0	0	0	0	0	0	0	0	0	0	0	0	0	0	0	0	0
snoRNA	ENSMMUG00000036495	2	20429137	20429208	-	0	0	0	0	0	0	0	0	0	0	0	0	0	0	0	0	0	0	0	0	0	0	0	0	0	0	0	0	0	0
snRNA	ENSMMUG00000024598	2	21133975	21134083	+	0	0	0	0	0	0	0	0	0	0	0	0	0	0	0	0	0	0	0	0	0	0	0	0	0	0	0	0	0	0
snoRNA	ENSMMUG00000036853	2	21385145	21385250	+	0	0	0	0	0	0	0	0	0	0	0	0	0	0	0	0	0	0	0	0	0	0	0	0	0	0	0	0	0	0
snoRNA	ENSMMUG00000037094	2	21701414	21701516	+	0	0	0	0	0	0	0	0	0	0	0	0	0	0	0	0	0	0	0	0	0	0	0	0	0	0	0	0	0	0
snRNA	ENSMMUG00000036345	2	21805379	21805481	+	0	0	0	0	0	0	0	0	0	0	0	0	0	0	0	0	0	0	0	0	0	0	0	0	0	0	0	0	0	0
snRNA	ENSMMUG00000025264	2	22955227	22955332	-	0	0	0	0	0	0	0	0	0	0	0	0	0	0	0	0	0	0	0	0	0	0	0	0	0	0	0	0	0	0
snRNA	ENSMMUG00000026103	2	23347326	23347492	+	0	0	0	0	0	0	0	0	0	0	0	0	0	0	0	0	0	0	0	0	0	0	0	0	0	0	0	0	0	0
snRNA	ENSMMUG00000027556	2	25799739	25799814	-	0	0	0	0	0	0	0	0	0	0	0	0	0	0	0	0	0	0	0	0	0	0	0	0	0	0	0	0	0	0
snRNA	ENSMMUG00000037195	2	27132134	27132236	+	0	0	0	0	0	0	0	0	0	0	0	0	0	0	0	0	0	0	0	0	0	0	0	0	0	0	0	0	0	0
snoRNA	ENSMMUG00000024834	2	28684252	28684386	+	0	0	0	0	0	0	0	0	0	0	0	0	0	0	0	0	0	0	0	0	0	0	0	0	0	0	0	0	0	0
snoRNA	ENSMMUG00000036512	2	29128875	29129067	-	0	0	0	0	0	0	0	0	0	0	0	0	0	0	0	0	0	0	0	0	0	0	0	0	0	0	0	0	0	0
snRNA	ENSMMUG00000036670	2	29339341	29339439	+	0	0	0	0	0	0	0	0	0	0	0	0	0	0	0	0	0	0	0	0	0	0	0	0	0	0	0	0	0	0
snRNA	ENSMMUG00000034009	2	30679840	30679969	-	0	0	0	0	0	0	0	0	0	0	0	0	0	0	0	0	0	0	0	0	0	0	0	0	0	0	0	0	0	0
snRNA	ENSMMUG00000025159	2	36980798	36980913	-	0	0	0	0	0	0	0	0	0	0	0	0	0	0	0	0	0	0	0	0	0	0	0	0	0	0	0	0	0	0
snRNA	ENSMMUG00000028247	2	37565738	37565844	+	0	0	0	0	0	0	0	0	0	0	0	0	0	0	0	0	0	0	0	0	0	0	0	0	0	0	0	0	0	0
snRNA	ENSMMUG00000027612	2	39370850	39370956	-	0	0	0	0	0	0	0	0	0	0	0	0	0	0	0	0	0	0	0	0	0	0	0	0	0	0	0	0	0	0
snoRNA	ENSMMUG00000037286	2	41566795	41566897	+	0	0	0	0	0	0	0	0	0	0	0	0	0	0	0	0	0	0	0	0	0	0	0	0	0	0	0	0	0	0
snRNA	ENSMMUG00000034764	2	41632849	41632968	-	0	0	0	0	0	0	0	0	0	0	0	0	0	0	0	0	0	0	0	0	0	0	0	0	0	0	0	0	0	0
snoRNA	ENSMMUG00000035881	2	42241466	42241537	+	0	0	0	0	0	0	0	0	0	0	0	0	0	0	0	0	0	0	0	0	0	0	0	0	0	0	0	0	0	0
snoRNA	ENSMMUG00000037330	2	42736363	42736466	+	0	0	0	0	0	0	0	0	0	0	0	0	0	0	0	0	0	0	0	0	0	0	0	0	0	0	0	0	0	0
snoRNA	ENSMMUG00000025650	2	43809602	43809732	+	0	0	0	0	0	0	0	0	0	0	0	0	0	0	0	0	0	0	0	0	0	0	0	0	0	0	0	0	0	0
snRNA	ENSMMUG00000036914	2	44408681	44408773	+	0	0	0	0	0	0	0	0	0	0	0	0	0	0	0	0	0	0	0	0	0	0	0	0	0	0	0	0	0	0
snRNA	ENSMMUG00000025009	2	45104516	45104619	-	0	0	0	0	0	0	0	0	0	0	0	0	0	0	0	0	0	0	0	0	0	0	0	0	0	0	0	0	0	0
snRNA	ENSMMUG00000035609	2	45368325	45368384	+	0	0	0	0	0	0	0	0	0	0	0	0	0	0	0	0	0	0	0	0	0	0	0	0	0	0	0	0	0	0
snoRNA	ENSMMUG00000037211	2	45429416	45429517	+	0	0	0	0	0	0	0	0	0	0	0	0	0	0	0	0	0	0	0	0	0	0	0	0	0	0	0	0	0	0
snRNA	ENSMMUG00000026804	2	45940006	45940168	-	0	0	0	0	0	0	0	0	0	0	0	0	0	0	0	0	0	0	0	0	0	0	0	0	0	0	0	0	0	0
snoRNA	ENSMMUG00000036219	2	46462328	46462429	-	0	0	0	0	0	0	0	0	0	0	0	0	0	0	0	0	0	0	0	0	0	0	0	0	0	0	0	0	0	0
snoRNA	ENSMMUG00000024462	2	48205395	48205533	+	3	2	3	1	2	4	2	1	1	3	2	1	2	2	0	3	7	2	2	2	3	0	2	1	3	4	1	2	4	4
snRNA	ENSMMUG00000036825	2	48546428	48546529	-	0	0	0	0	0	0	0	0	0	0	0	0	0	0	0	0	0	0	0	0	0	0	0	0	0	0	0	0	0	0
snRNA	ENSMMUG00000035979	2	48560461	48560542	+	0	0	0	0	0	0	0	0	0	0	0	0	0	0	0	0	0	0	0	0	0	0	0	0	0	0	0	0	0	0
snRNA	ENSMMUG00000034631	2	50819183	50819296	-	0	0	0	0	0	0	0	0	0	0	0	0	0	0	0	0	0	0	0	0	0	0	0	0	0	0	0	0	0	0
snoRNA	ENSMMUG00000035777	2	50898551	50898653	-	0	0	0	0	0	0	0	0	0	0	0	0	0	0	0	0	0	0	0	0	0	0	0	0	0	0	0	0	0	0
snRNA	ENSMMUG00000024425	2	50971566	50971669	-	0	0	0	0	0	0	0	0	0	0	0	0	0	0	0	0	0	0	0	0	0	0	0	0	0	0	0	0	0	0
snRNA	ENSMMUG00000025485	2	51048890	51048996	+	0	0	0	0	0	0	0	0	0	0	0	0	0	0	0	0	0	0	0	0	0	0	0	0	0	0	0	0	0	0
snRNA	ENSMMUG00000034849	2	51111026	51111172	-	0	0	0	0	0	0	0	0	0	0	0	0	0	0	0	0	0	0	0	0	0	0	0	0	0	0	0	0	0	0
snoRNA	ENSMMUG00000025827	2	52067975	52068112	-	0	0	0	0	0	0	0	0	0	0	0	0	0	0	0	0	0	0	0	0	0	0	0	0	0	0	0	0	0	0
snRNA	ENSMMUG00000036638	2	52594162	52594280	+	0	0	0	0	0	0	0	0	0	0	0	0	0	0	0	0	0	0	0	0	0	0	0	0	0	0	0	0	0	0
snoRNA	ENSMMUG00000037221	2	54881687	54881804	+	0	0	0	0	0	0	0	0	0	0	0	0	0	0	0	0	0	0	0	0	0	0	0	0	0	0	0	0	0	0
snoRNA	ENSMMUG00000035640	2	56148876	56148979	+	0	0	0	0	0	0	0	0	0	0	0	0	0	0	0	0	0	0	0	0	0	0	0	0	0	0	0	0	0	0
snoRNA	ENSMMUG00000037119	2	57906349	57906462	-	0	0	0	0	0	0	0	0	0	0	0	0	0	0	0	0	0	0	0	0	0	0	0	0	0	0	0	0	0	0
snRNA	ENSMMUG00000036564	2	60751469	60751573	+	0	0	0	0	0	0	0	0	0	0	0	0	0	0	0	0	0	0	0	0	0	0	0	0	0	0	0	0	0	0
snRNA	ENSMMUG00000024730	2	61525238	61525344	+	0	0	0	0	0	0	0	0	0	0	0	0	0	0	0	0	0	0	0	0	0	0	0	0	0	0	0	0	0	0
snRNA	ENSMMUG00000035657	2	62615264	62615326	+	0	0	0	0	0	0	0	0	0	0	0	0	0	0	0	0	0	0	0	0	0	0	0	0	0	0	0	0	0	0
snRNA	ENSMMUG00000027785	2	62960363	62960470	+	0	0	0	0	0	0	0	0	0	0	0	0	0	0	0	0	0	0	0	0	0	0	0	0	0	0	0	0	0	0
snRNA	ENSMMUG00000035353	2	63110952	63111141	-	0	0	0	0	0	0	0	0	0	0	0	0	0	0	0	0	0	0	0	0	0	0	0	0	0	0	0	0	0	0
snoRNA	ENSMMUG00000035618	2	63137777	63137880	-	0	0	0	0	0	0	0	0	0	0	0	0	0	0	0	0	0	0	0	0	0	0	0	0	0	0	0	0	0	0
snRNA	ENSMMUG00000024216	2	63192254	63192319	-	0	0	0	0	0	0	0	0	0	0	0	0	0	0	0	0	0	0	0	0	0	0	0	0	0	0	0	0	0	0
snRNA	ENSMMUG00000026365	2	63639033	63639196	-	0	0	0	0	0	0	0	0	0	0	0	0	0	0	0	0	0	0	0	0	0	0	0	0	0	0	0	0	0	0
snoRNA	ENSMMUG00000036699	2	63642848	63642950	-	0	0	0	0	0	0	0	0	0	0	0	0	0	0	0	0	0	0	0	0	0	0	0	0	0	0	0	0	0	0
snRNA	ENSMMUG00000027395	2	65405758	65405860	-	0	0	0	0	0	0	0	0	0	0	0	0	0	0	0	0	0	0	0	0	0	0	0	0	0	0	0	0	0	0
snRNA	ENSMMUG00000033044	2	71894232	71894334	-	0	0	0	0	0	0	0	0	0	0	0	0	0	0	0	0	0	0	0	0	0	0	0	0	0	0	0	0	0	0
snoRNA	ENSMMUG00000025017	2	72328594	72328805	+	0	0	0	0	0	0	0	0	0	0	0	0	0	0	0	0	0	0	0	0	0	0	0	0	0	0	0	0	0	0
snRNA	ENSMMUG00000037349	2	73555907	73556014	-	0	0	0	0	0	0	0	0	0	0	0	0	0	0	0	0	0	0	0	0	0	0	0	0	0	0	0	0	0	0
snoRNA	ENSMMUG00000033186	2	75517322	75517536	+	0	0	0	0	0	0	0	0	0	0	0	0	0	0	0	0	0	0	0	0	0	0	0	0	0	0	0	0	0	0
snRNA	ENSMMUG00000033802	2	78777371	78777496	-	0	0	0	0	0	0	0	0	0	0	0	0	0	0	0	0	0	0	0	0	0	0	0	0	0	0	0	0	0	0
snRNA	ENSMMUG00000024983	2	78840203	78840310	-	0	0	0	0	0	0	0	0	0	0	0	0	0	0	0	0	0	0	0	0	0	0	0	0	0	0	0	0	0	0
snRNA	ENSMMUG00000032888	2	78853761	78853867	+	0	0	0	0	0	0	0	0	0	0	0	0	0	0	0	0	0	0	0	0	0	0	0	0	0	0	0	0	0	0
snRNA	ENSMMUG00000024363	2	78876166	78876271	-	0	0	0	0	0	0	0	0	0	0	0	0	0	0	0	0	0	0	0	0	0	0	0	0	0	0	0	0	0	0
snoRNA	ENSMMUG00000037432	2	78910673	78910779	+	0	0	0	0	0	0	0	0	0	0	0	0	0	0	0	0	0	0	0	0	0	0	0	0	0	0	0	0	0	0
snRNA	ENSMMUG00000036754	2	81953183	81953276	-	0	0	0	0	0	0	0	0	0	0	0	0	0	0	0	0	0	0	0	0	0	0	0	0	0	0	0	0	0	0
snoRNA	ENSMMUG00000035801	2	82814492	82814571	+	0	0	0	0	0	0	0	0	0	0	0	0	0	0	0	0	0	0	0	0	0	0	0	0	0	0	0	0	0	0
snoRNA	ENSMMUG00000033282	2	82950874	82950997	+	0	0	0	0	0	0	0	0	0	0	0	0	0	0	0	0	0	0	0	0	0	0	0	0	0	0	0	0	0	0
snoRNA	ENSMMUG00000028285	2	83000291	83000357	+	0	0	0	0	0	0	0	0	0	0	0	0	0	0	0	0	0	0	0	0	0	0	0	0	0	0	0	0	0	0
snoRNA	ENSMMUG00000037038	2	83049659	83049762	+	0	0	0	0	0	0	0	0	0	0	0	0	0	0	0	0	0	0	0	0	0	0	0	0	0	0	0	0	0	0
snoRNA	ENSMMUG00000033050	2	83670807	83670883	-	178	269	307	99	125	190	288	221	327	244	188	299	104	181	93	185	259	156	269	146	450	79	278	189	255	271	227	125	240	238
snoRNA	ENSMMUG00000036458	2	83672147	83672220	-	0	0	0	0	0	0	0	0	0	0	0	0	0	0	0	0	0	0	0	0	0	0	0	0	0	0	0	0	0	0
snoRNA	ENSMMUG00000037073	2	83673077	83673160	-	0	0	0	0	0	0	0	0	1	0	0	1	0	0	0	0	0	0	0	0	2	0	0	0	1	1	1	0	0	1
snoRNA	ENSMMUG00000032872	2	83674602	83674669	-	0	0	0	0	0	0	0	0	0	0	0	0	0	0	0	0	0	0	0	0	0	0	0	0	0	0	0	0	0	0
snoRNA	ENSMMUG00000035848	2	83674927	83675006	-	0	0	0	0	0	0	0	0	0	0	0	0	0	0	0	0	0	0	0	0	0	0	0	0	0	0	0	0	0	0
snRNA	ENSMMUG00000033553	2	83812521	83812659	-	0	0	0	0	0	0	0	0	0	0	0	0	0	0	0	0	0	0	0	0	0	0	0	0	0	0	0	0	0	0
snRNA	ENSMMUG00000035928	2	83821918	83822015	+	0	0	0	0	0	0	0	0	0	0	0	0	0	0	0	0	0	0	0	0	0	0	0	0	0	0	0	0	0	0
snRNA	ENSMMUG00000033582	2	84824295	84824415	+	0	0	0	0	0	0	0	0	0	0	0	0	0	0	0	0	0	0	0	0	0	0	0	0	0	0	0	0	0	0
snRNA	ENSMMUG00000035494	2	88328215	88328276	-	0	0	0	0	0	0	0	0	0	0	0	0	0	0	0	0	0	0	0	0	0	0	0	0	0	0	0	0	0	0
snoRNA	ENSMMUG00000036287	2	89453603	89453680	-	0	0	0	0	0	0	0	0	0	0	0	0	0	0	0	0	0	0	0	0	0	0	0	0	0	0	0	0	0	0
snoRNA	ENSMMUG00000035599	2	89870972	89871012	-	0	0	0	0	0	0	0	0	0	0	0	0	0	0	0	0	0	0	0	0	0	0	0	0	0	0	0	0	0	0
snoRNA	ENSMMUG00000024064	2	91281449	91281655	+	0	0	0	0	0	0	0	0	0	0	0	0	0	0	0	0	0	0	0	0	0	0	0	0	0	0	0	0	0	0
tRNA	tRNA-Arg-ACG-2-1	2	92197097	92197170	+	0	0	0	0	0	0	0	0	0	0	0	0	0	0	0	0	0	0	0	0	0	0	0	0	0	0	0	0	0	0
snRNA	ENSMMUG00000035160	2	94370501	94370624	-	0	0	0	0	0	0	0	0	0	0	0	0	0	0	0	0	0	0	0	0	0	0	0	0	0	0	0	0	0	0
snoRNA	ENSMMUG00000025979	2	94696568	94696700	+	0	0	0	0	0	0	0	0	0	0	0	0	0	0	0	0	0	0	0	0	0	0	0	0	0	0	0	0	0	0
snRNA	ENSMMUG00000024178	2	96035532	96035644	+	0	0	0	0	0	0	0	0	0	0	0	0	0	0	0	0	1	0	0	0	0	0	0	0	0	0	0	0	0	0
snoRNA	ENSMMUG00000032942	2	96292213	96292345	-	0	0	0	0	0	0	0	0	0	0	0	0	0	0	0	0	0	0	0	0	0	0	0	0	0	0	0	0	0	0
snRNA	ENSMMUG00000028312	2	96518864	96519005	-	0	0	0	0	0	0	0	0	0	0	0	0	0	0	0	0	0	0	0	0	0	0	0	0	0	0	0	0	0	0
snoRNA	ENSMMUG00000026185	2	97128870	97129023	-	0	0	0	0	0	0	0	0	0	0	0	1	0	0	0	0	0	0	0	0	0	0	0	0	0	0	0	0	1	0
snoRNA	ENSMMUG00000024706	2	97131685	97131835	-	0	0	1	0	0	1	1	1	0	0	0	0	0	1	0	1	1	1	0	0	0	0	0	0	0	1	0	1	2	0
snRNA	ENSMMUG00000027763	2	97497823	97497929	-	0	0	0	0	0	0	0	0	0	0	0	0	0	0	0	0	0	0	0	0	0	0	0	0	0	0	0	0	0	0
snoRNA	ENSMMUG00000026515	2	98111846	98111924	-	0	0	0	0	0	0	0	0	0	0	0	0	0	0	0	0	0	0	0	0	0	0	0	0	0	0	0	0	0	0
snRNA	ENSMMUG00000025313	2	98249297	98249401	+	0	0	0	0	0	0	0	0	0	0	0	0	0	0	0	0	0	0	0	0	0	0	0	0	0	0	0	0	0	0
snRNA	ENSMMUG00000035668	2	98979808	98979870	+	0	0	0	0	0	0	0	0	0	0	0	0	0	0	0	0	0	0	0	0	0	0	0	0	0	0	0	0	0	0
snoRNA	ENSMMUG00000037131	2	99359745	99359848	-	0	0	0	0	0	0	0	0	0	0	0	0	0	0	0	0	0	0	0	0	0	0	0	0	0	0	0	0	0	0
snRNA	ENSMMUG00000034815	2	99422048	99422151	-	0	0	0	0	0	0	0	0	0	0	0	0	0	0	0	0	0	0	0	0	0	0	0	0	0	0	0	0	0	0
snoRNA	ENSMMUG00000033170	2	101476812	101476874	-	0	0	0	0	0	0	0	0	0	0	0	0	0	0	0	0	0	0	0	0	0	0	0	0	0	0	0	0	0	0
snoRNA	ENSMMUG00000033108	2	102338685	102338760	-	35	72	58	31	34	51	71	51	63	59	47	81	41	49	28	49	68	42	79	42	153	21	62	42	60	69	66	42	62	69
snoRNA	ENSMMUG00000036842	2	103215996	103216184	-	0	0	0	0	0	0	0	0	0	0	0	0	0	0	0	0	0	0	0	0	0	0	0	0	0	0	0	0	0	0
snoRNA	ENSMMUG00000026449	2	103216760	103216891	-	0	0	0	0	0	0	0	0	0	0	0	0	0	0	0	0	0	0	0	0	0	0	0	0	0	0	0	0	0	0
tRNA	tRNA-Asp-GTC-6-1	2	103461486	103461557	+	0	0	0	0	0	0	0	0	0	0	0	0	0	0	0	0	0	0	0	0	0	0	0	0	0	0	0	0	0	0
snRNA	ENSMMUG00000027895	2	106168216	106168322	-	0	0	0	0	0	0	0	0	0	0	0	0	0	0	0	0	0	0	0	0	0	0	0	0	0	0	0	0	0	0
snoRNA	ENSMMUG00000033220	2	106209445	106209579	-	0	0	0	0	0	0	0	0	0	0	0	0	0	0	0	0	0	0	0	0	0	0	0	0	0	0	0	0	0	0
snoRNA	ENSMMUG00000036782	2	107179310	107179413	+	0	0	0	0	0	0	0	0	0	0	0	0	0	0	0	0	0	0	0	0	0	0	0	0	0	0	0	0	0	0
snRNA	ENSMMUG00000036684	2	107627250	107627358	-	0	0	0	0	0	0	0	0	0	0	0	0	0	0	0	0	0	0	0	0	0	0	0	0	0	0	0	0	0	0
snoRNA	ENSMMUG00000026768	2	107642599	107642730	+	1	1	1	0	0	1	0	0	0	0	0	0	1	1	1	1	1	2	0	1	1	0	0	1	1	0	0	1	2	1
snoRNA	ENSMMUG00000028397	2	108289763	108289894	-	0	0	0	0	0	0	0	0	0	0	0	0	0	0	0	0	0	0	0	0	0	0	0	0	0	0	0	0	0	0
snRNA	ENSMMUG00000033099	2	108802656	108802763	+	0	0	0	0	0	0	0	0	0	0	0	0	0	0	0	0	0	0	0	0	0	0	0	0	0	0	0	0	0	0
snoRNA	ENSMMUG00000024701	2	109190205	109190337	+	0	0	0	0	0	0	0	0	0	0	0	0	0	0	0	0	0	0	0	0	0	0	0	0	0	0	0	0	0	0
snRNA	ENSMMUG00000024203	2	109694710	109694813	+	0	0	0	0	0	0	0	0	0	0	0	0	0	0	0	0	0	0	0	0	0	0	0	0	0	0	0	0	0	0
tRNA	tRNA-Leu-CAA-6-1	2	109816239	109816345	-	0	0	0	0	0	0	0	0	0	0	0	0	0	0	0	0	0	0	0	0	0	0	0	0	0	0	0	0	0	0
snRNA	ENSMMUG00000024344	2	111030723	111030826	-	0	0	0	0	0	0	0	0	0	0	0	0	0	0	0	0	0	0	0	0	0	0	0	0	0	0	0	0	0	0
snoRNA	ENSMMUG00000037125	2	111060613	111060718	-	0	0	0	0	0	0	0	0	0	0	0	0	0	0	0	0	0	0	0	0	0	0	0	0	0	0	0	0	0	0
snRNA	ENSMMUG00000027920	2	111425263	111425369	+	0	0	0	0	0	0	0	0	0	0	0	0	0	0	0	0	0	0	0	0	0	0	0	0	0	0	0	0	0	0
tRNA	tRNA-Tyr-GTA-8-1	2	113049320	113049385	+	0	0	0	0	0	0	0	0	0	0	0	0	0	0	0	0	0	0	0	0	0	0	0	0	0	0	0	0	0	0
tRNA	tRNA-Asn-GTT-19-1	2	113049485	113049558	+	0	0	0	0	0	0	0	0	0	0	0	0	0	0	0	0	0	0	0	0	0	0	0	0	0	0	0	0	0	0
tRNA	tRNA-Ser-TGA-9-1	2	113064031	113064100	+	0	0	0	0	0	0	0	0	0	0	0	0	0	0	0	0	0	0	0	0	0	0	0	0	0	0	0	0	0	0
snRNA	ENSMMUG00000028034	2	113459353	113459459	+	0	0	0	0	0	0	0	0	0	0	0	0	0	0	0	0	0	0	0	0	0	0	0	0	0	0	0	0	0	0
snoRNA	ENSMMUG00000035899	2	114013878	114013978	+	0	0	0	0	0	0	0	0	0	0	0	0	0	0	0	0	0	0	0	0	0	0	0	0	0	0	0	0	0	0
snoRNA	ENSMMUG00000024707	2	114223545	114223675	+	0	0	0	0	0	0	0	0	0	0	0	0	0	0	0	0	0	0	0	0	0	0	0	0	0	0	0	0	0	0
snRNA	ENSMMUG00000035726	2	114292265	114292367	-	0	0	0	0	0	0	0	0	0	0	0	0	0	0	0	0	0	0	0	0	0	0	0	0	0	0	0	0	0	0
snoRNA	ENSMMUG00000036456	2	115352237	115352340	-	0	0	0	0	0	0	0	0	0	0	0	0	0	0	0	0	0	0	0	0	0	0	0	0	0	0	0	0	0	0
snRNA	ENSMMUG00000027561	2	115541068	115541174	+	0	0	0	0	0	0	0	0	0	0	0	0	0	0	0	0	0	0	0	0	0	0	0	0	0	0	0	0	0	0
snRNA	ENSMMUG00000025175	2	116057582	116057745	+	0	0	0	0	0	0	0	0	0	0	0	0	0	0	0	0	0	0	0	0	0	0	0	0	0	0	0	0	0	0
snRNA	ENSMMUG00000035795	2	116847539	116847600	-	0	0	0	0	0	0	0	0	0	0	0	0	0	0	0	0	0	0	0	0	0	0	0	0	0	0	0	0	0	0
snRNA	ENSMMUG00000027501	2	116857889	116857995	-	0	0	0	0	0	0	0	0	0	0	0	0	0	0	0	0	0	0	0	0	0	0	0	0	0	0	0	0	0	0
snRNA	ENSMMUG00000034148	2	116951418	116951546	-	0	0	0	0	0	0	0	0	0	0	0	0	0	0	0	0	0	0	0	0	0	0	0	0	0	0	0	0	0	0
snRNA	ENSMMUG00000028069	2	117299308	117299414	+	0	0	0	0	0	0	0	0	0	0	0	0	0	0	0	0	0	0	0	0	0	0	0	0	0	0	0	0	0	0
snRNA	ENSMMUG00000034385	2	118601809	118601999	-	0	0	0	0	0	0	0	0	0	0	0	0	0	0	0	0	0	0	0	0	0	0	0	0	0	0	0	0	0	0
tRNA	tRNA-Gly-GCC-9-1	2	119395745	119395799	-	0	0	0	0	0	0	0	0	0	0	0	0	0	0	0	0	0	0	0	0	0	0	0	0	0	0	0	0	0	0
tRNA	tRNA-Val-AAC-4-1	2	119785021	119785094	-	0	0	0	0	0	0	0	0	0	0	0	0	0	0	0	0	0	0	0	0	0	0	0	0	0	0	0	0	0	0
snRNA	ENSMMUG00000037299	2	124066695	124066748	+	0	0	0	0	0	0	0	0	0	0	0	0	0	0	0	0	0	0	0	0	0	0	0	0	0	0	0	0	0	0
snoRNA	ENSMMUG00000037190	2	124439651	124439747	+	0	0	0	0	0	0	0	0	0	0	0	0	0	0	0	0	0	0	0	0	0	0	0	0	0	0	0	0	0	0
snoRNA	ENSMMUG00000023820	2	126998880	126999011	-	0	0	0	0	0	0	0	0	0	0	0	0	0	0	0	0	0	0	0	0	0	0	0	0	0	0	0	0	0	0
snoRNA	ENSMMUG00000035915	2	127164245	127164577	+	0	1	1	0	1	0	2	1	1	0	1	1	0	0	0	1	0	0	1	0	1	0	0	0	0	0	0	0	1	0
snRNA	ENSMMUG00000027403	2	127206564	127206632	+	0	0	0	0	0	0	0	0	0	0	0	0	0	0	0	0	0	0	0	0	0	0	0	0	0	0	0	0	0	0
snoRNA	ENSMMUG00000036616	2	133323167	133323270	-	0	0	0	0	0	0	0	0	0	0	0	0	0	0	0	0	0	0	0	0	0	0	0	0	0	0	0	0	0	0
snRNA	ENSMMUG00000027372	2	133358947	133359050	-	0	0	0	0	0	0	0	0	0	0	0	0	0	0	0	0	0	0	0	0	0	0	0	0	0	0	0	0	0	0
snRNA	ENSMMUG00000035663	2	133919755	133919857	-	0	0	0	0	0	0	0	0	0	0	0	0	0	0	0	0	0	0	0	0	0	0	0	0	0	0	0	0	0	0
snRNA	ENSMMUG00000036406	2	134179510	134179580	+	0	0	0	0	0	0	0	0	0	0	0	0	0	0	0	0	0	0	0	0	0	0	0	0	0	0	0	0	0	0
snoRNA	ENSMMUG00000035695	2	137701531	137701635	+	0	0	0	0	0	0	0	0	0	0	0	0	0	0	0	0	0	0	0	0	0	0	0	0	0	0	0	0	0	0
snRNA	ENSMMUG00000037365	2	137852566	137852670	+	0	0	0	0	0	0	0	0	0	0	0	0	0	0	0	0	0	0	0	0	0	0	0	0	0	0	0	0	0	0
snRNA	ENSMMUG00000035943	2	138002499	138002597	+	0	0	0	0	0	0	0	0	0	0	0	0	0	0	0	0	0	0	0	0	0	0	0	0	0	0	0	0	0	0
snRNA	ENSMMUG00000036178	2	138269091	138269186	-	0	0	0	0	0	0	0	0	0	0	0	0	0	0	0	0	0	0	0	0	0	0	0	0	0	0	0	0	0	0
snRNA	ENSMMUG00000027887	2	140803638	140803744	+	0	0	0	0	0	0	0	0	0	0	0	0	0	0	0	0	0	0	0	0	0	0	0	0	0	0	0	0	0	0
snRNA	ENSMMUG00000025640	2	141266720	141266821	-	0	0	0	0	0	0	0	0	0	0	0	0	0	0	0	0	0	0	0	0	0	0	0	0	0	0	0	0	0	0
snRNA	ENSMMUG00000037362	2	145081239	145081300	-	0	0	0	0	0	0	0	0	0	0	0	0	0	0	0	0	0	0	0	0	0	0	0	0	0	0	0	0	0	0
snRNA	ENSMMUG00000023981	2	145438834	145438998	+	0	0	0	0	0	0	0	0	0	0	0	0	0	0	0	0	0	0	0	0	0	0	0	0	0	0	0	0	0	0
snRNA	ENSMMUG00000035660	2	145451566	145451663	+	0	0	0	0	0	0	0	0	0	0	0	0	0	0	0	0	0	0	0	0	0	0	0	0	0	0	0	0	0	0
snoRNA	ENSMMUG00000035867	2	145605994	145606055	+	0	0	0	0	0	0	0	0	0	0	0	0	0	0	0	0	0	0	0	0	0	0	0	0	0	0	0	0	0	0
snRNA	ENSMMUG00000033106	2	145709083	145709184	-	0	0	0	0	0	0	0	0	0	0	0	0	0	0	0	0	0	0	0	0	0	0	0	0	0	0	0	0	0	0
snRNA	ENSMMUG00000027831	2	145946922	145947028	+	0	0	0	0	0	0	0	0	0	0	0	0	0	0	0	0	0	0	0	0	0	0	0	0	0	0	0	0	0	0
snRNA	ENSMMUG00000025394	2	148437886	148437994	-	0	0	0	0	0	0	0	0	0	0	0	0	0	0	0	0	0	0	0	0	0	0	0	0	0	0	0	0	0	0
snRNA	ENSMMUG00000028289	2	150931703	150931809	+	0	0	0	0	0	0	0	0	0	0	0	0	0	0	0	0	0	0	0	0	0	0	0	0	0	0	0	0	0	0
snRNA	ENSMMUG00000036197	2	151181293	151181352	-	0	0	0	0	0	0	0	0	0	0	0	0	0	0	0	0	0	0	0	0	0	0	0	0	0	0	0	0	0	0
snRNA	ENSMMUG00000035327	2	152976664	152976765	+	0	0	0	0	0	0	0	0	0	0	0	0	0	0	0	0	0	0	0	0	0	0	0	0	0	0	0	0	0	0
snRNA	ENSMMUG00000035834	2	154067130	154067237	-	0	0	0	0	0	0	0	0	0	0	0	0	0	0	0	0	0	0	0	0	0	0	0	0	0	0	0	0	0	0
snoRNA	ENSMMUG00000027492	2	154179867	154179943	-	0	0	0	0	0	0	0	0	0	0	0	0	0	0	0	0	0	0	0	0	0	0	0	0	0	0	0	0	0	0
snoRNA	ENSMMUG00000024125	2	156221422	156221558	+	0	0	0	0	0	0	0	0	0	0	0	0	0	0	0	0	0	0	0	0	1	0	0	0	1	0	0	0	1	0
snRNA	ENSMMUG00000024727	2	156599066	156599172	+	0	0	0	0	0	0	0	0	0	0	0	0	0	0	0	0	0	0	0	0	0	0	0	0	0	0	0	0	0	0
snRNA	ENSMMUG00000028001	2	157676119	157676225	+	0	0	0	0	0	0	0	0	0	0	0	0	0	0	0	0	0	0	0	0	0	0	0	0	0	0	0	0	0	0
snRNA	ENSMMUG00000027743	2	157763027	157763133	-	0	0	0	0	0	0	0	0	0	0	0	0	0	0	0	0	0	0	0	0	0	0	0	0	0	0	0	0	0	0
tRNA	tRNA-Cys-GCA-6-1	2	158005548	158005620	+	0	0	0	0	0	0	0	0	0	0	0	0	0	0	0	0	0	0	0	0	0	0	0	0	0	0	0	0	0	0
tRNA	tRNA-Cys-GCA-7-1	2	158008245	158008317	+	0	0	0	0	0	0	0	0	0	0	0	0	0	0	0	0	0	0	0	0	0	0	0	0	0	0	0	0	0	0
snRNA	ENSMMUG00000035895	2	159951012	159951074	+	0	0	0	0	0	0	0	0	0	0	0	0	0	0	0	0	0	0	0	0	0	0	0	0	0	0	0	0	0	0
tRNA	tRNA-Lys-TTT-12-1	2	160069893	160069966	+	0	0	0	0	0	0	0	0	0	0	0	0	0	0	0	0	0	0	0	0	0	0	0	0	0	0	0	0	0	0
snRNA	ENSMMUG00000035710	2	161258045	161258151	-	0	0	0	0	0	0	0	0	0	0	0	0	0	0	0	0	0	0	0	0	0	0	0	0	0	0	0	0	0	0
snRNA	ENSMMUG00000024905	2	162245113	162245251	+	0	0	0	0	0	0	0	0	0	0	0	0	0	0	0	0	0	0	0	0	0	0	0	0	0	0	0	0	0	0
snRNA	ENSMMUG00000025453	2	162514426	162514526	-	0	0	0	0	0	0	0	0	0	0	0	0	0	0	0	0	0	0	0	0	0	0	0	0	0	0	0	0	0	0
snRNA	ENSMMUG00000026026	2	162743329	162743441	-	0	0	0	0	0	0	0	0	0	0	0	0	0	0	0	0	0	0	0	0	0	0	0	0	0	0	0	0	0	0
snRNA	ENSMMUG00000037311	2	165909329	165909426	-	0	0	0	0	0	0	0	0	0	0	0	0	0	0	0	0	0	0	0	0	0	0	0	0	0	0	0	0	0	0
snRNA	ENSMMUG00000037122	2	165945402	165945504	-	0	0	0	0	0	0	0	0	0	0	0	0	0	0	0	0	0	0	0	0	0	0	0	0	0	0	0	0	0	0
snoRNA	ENSMMUG00000033806	2	166351349	166351481	+	0	0	0	0	0	0	0	0	0	0	0	0	0	0	0	0	0	0	0	0	0	0	0	0	0	0	0	0	0	0
snRNA	ENSMMUG00000027487	2	166528053	166528159	+	0	0	0	0	0	0	0	0	0	0	0	0	0	0	0	0	0	0	0	0	0	0	0	0	0	0	0	0	0	0
snRNA	ENSMMUG00000036319	2	167809632	167809696	+	0	0	0	0	0	0	0	0	0	0	0	0	0	0	0	0	0	0	0	0	0	0	0	0	0	0	0	0	0	0
snoRNA	ENSMMUG00000035696	2	168037193	168037256	-	0	0	0	0	0	0	0	0	0	0	0	0	0	0	0	0	0	0	0	0	0	0	0	0	0	0	0	0	0	0
snRNA	ENSMMUG00000034975	2	168095834	168095962	+	0	0	0	0	0	0	0	0	0	0	0	0	0	0	0	0	0	0	0	0	0	0	0	0	0	0	0	0	0	0
snRNA	ENSMMUG00000024300	2	169669371	169669474	-	0	0	0	0	0	0	0	0	0	0	0	0	0	0	0	0	0	0	0	0	0	0	0	0	0	0	0	0	0	0
snRNA	ENSMMUG00000028427	2	169919892	169920053	+	0	0	0	0	0	0	0	0	0	0	0	0	0	0	0	0	0	0	0	0	0	0	0	0	0	0	0	0	0	0
snoRNA	ENSMMUG00000023963	2	172757459	172757673	-	0	0	0	0	0	0	0	0	0	0	0	0	0	0	0	0	0	0	0	0	0	0	0	0	0	0	0	0	0	0
snoRNA	ENSMMUG00000023839	2	174515106	174515233	+	1	0	1	1	0	1	0	0	0	1	0	0	1	1	1	1	2	2	1	0	1	0	1	1	1	1	1	1	2	1
snoRNA	ENSMMUG00000036565	2	174645719	174645822	+	0	0	0	0	0	0	0	0	0	0	0	0	0	0	0	0	0	0	0	0	0	0	0	0	0	0	0	0	0	0
snRNA	ENSMMUG00000035470	2	175896288	175896348	+	0	0	0	0	0	0	0	0	0	0	0	0	0	0	0	0	0	0	0	0	0	0	0	0	0	0	0	0	0	0
snRNA	ENSMMUG00000033317	2	177687385	177687491	-	0	0	0	0	0	0	0	0	0	0	0	0	0	0	0	0	0	0	0	0	0	0	0	0	0	0	0	0	0	0
snRNA	ENSMMUG00000036610	2	179127571	179127675	-	0	0	0	0	0	0	0	0	0	0	0	0	0	0	0	0	0	0	0	0	0	0	0	0	0	0	0	0	0	0
snoRNA	ENSMMUG00000037192	2	179142348	179142416	+	9	19	17	7	16	10	26	8	27	13	11	33	10	8	4	12	14	7	21	12	47	4	17	11	10	15	12	12	15	12
snoRNA	ENSMMUG00000024301	2	179143870	179143996	+	0	0	0	0	0	0	0	0	0	0	0	0	0	0	0	0	0	0	0	0	0	0	0	0	0	0	0	0	0	0
snoRNA	ENSMMUG00000036683	2	179144222	179144399	+	1	2	2	1	1	1	1	1	1	1	0	1	0	1	0	1	3	2	1	1	2	0	1	0	1	1	0	1	7	0
snoRNA	ENSMMUG00000026177	2	179144831	179144962	+	13	12	14	11	7	15	10	16	11	16	18	8	17	35	46	17	18	37	17	10	11	16	16	18	18	17	22	13	20	17
snoRNA	ENSMMUG00000026741	2	179145139	179145277	+	0	0	0	0	0	1	0	0	0	0	0	0	0	0	0	0	1	0	0	0	0	0	0	0	0	1	0	0	1	0
snoRNA	ENSMMUG00000035728	2	179749321	179749425	-	0	0	0	0	0	0	0	0	0	0	0	0	0	0	0	0	0	0	0	0	0	0	0	0	0	0	0	0	0	0
snRNA	ENSMMUG00000033259	2	182482149	182482255	-	0	0	0	0	0	0	0	0	0	0	0	0	0	0	0	0	0	0	0	0	0	0	0	0	0	0	0	0	0	0
snoRNA	ENSMMUG00000036664	2	184768070	184768173	-	0	0	0	0	0	0	0	0	0	0	0	0	0	0	0	0	0	0	0	0	0	0	0	0	0	0	0	0	0	0
snRNA	ENSMMUG00000025093	2	184959611	184959772	-	0	0	0	0	0	0	0	0	0	0	0	0	0	0	0	0	0	0	0	0	0	0	0	0	0	0	0	0	0	0
snRNA	ENSMMUG00000035999	2	187715982	187716117	-	0	0	0	0	0	0	0	0	0	0	0	0	0	0	0	0	0	0	0	0	0	0	0	0	0	0	0	0	0	0
snoRNA	ENSMMUG00000036734	2	188060823	188060916	+	0	0	0	0	0	0	0	0	0	0	0	0	0	0	0	0	0	0	0	0	0	0	0	0	0	0	0	0	0	0
snRNA	ENSMMUG00000035191	2	188682952	188683061	+	0	0	0	0	0	0	0	0	0	0	0	0	0	0	0	0	0	0	0	0	0	0	0	0	0	0	0	0	0	0
snRNA	ENSMMUG00000025352	2	188724455	188724560	+	0	0	0	0	0	0	0	0	0	0	0	0	0	0	0	0	0	0	0	0	0	0	0	0	0	0	0	0	0	0
snRNA	ENSMMUG00000035954	2	189046169	189046233	+	0	0	0	0	0	0	0	0	0	0	0	0	0	0	0	0	0	0	0	0	0	0	0	0	0	0	0	0	0	0
snRNA	ENSMMUG00000026022	2	189096942	189097046	+	0	0	0	0	0	0	0	0	0	0	0	0	0	0	0	0	0	0	0	0	0	0	0	0	0	0	0	0	0	0
snRNA	ENSMMUG00000036846	2	189176414	189176543	+	0	0	0	0	0	0	0	0	0	0	0	0	0	0	0	0	0	0	0	0	0	0	0	0	0	0	0	0	0	0
snRNA	ENSMMUG00000035633	2	189383669	189383728	-	0	0	0	0	0	0	0	0	0	0	0	0	0	0	0	0	0	0	0	0	0	0	0	0	0	0	0	0	0	0
snRNA	ENSMMUG00000036074	3	260326	260430	-	0	0	0	0	0	0	0	0	0	0	0	0	0	0	0	0	0	0	0	0	0	0	0	0	0	0	0	0	0	0
snRNA	ENSMMUG00000035226	3	2731999	2732101	+	0	0	0	0	0	0	0	0	0	0	0	0	0	0	0	0	0	0	0	0	0	0	0	0	0	0	0	0	0	0
snRNA	ENSMMUG00000036399	3	2817252	2817354	+	0	0	0	0	0	0	0	0	0	0	0	0	0	0	0	0	0	0	0	0	0	0	0	0	0	0	0	0	0	0
snoRNA	ENSMMUG00000033217	3	4789749	4789870	-	0	0	0	0	0	0	0	0	0	0	0	0	0	0	0	0	0	0	0	0	0	0	0	0	0	0	0	0	0	0
snoRNA	ENSMMUG00000024996	3	5113538	5113658	-	0	0	0	0	0	0	0	0	0	0	0	0	0	0	0	0	0	0	0	0	0	0	0	0	0	0	0	0	0	0
snoRNA	ENSMMUG00000024041	3	6142637	6142771	-	0	0	0	0	0	0	0	0	0	0	0	0	0	0	0	0	0	0	0	0	0	0	0	0	0	0	0	0	0	0
snoRNA	ENSMMUG00000036517	3	7271038	7271121	+	0	0	0	0	0	0	0	0	0	0	0	0	0	0	0	0	0	0	0	0	0	0	0	0	0	0	0	0	0	0
snoRNA	ENSMMUG00000036134	3	7744407	7744489	-	0	0	0	0	0	0	0	0	0	0	0	0	0	0	0	0	0	0	0	0	0	0	0	0	0	0	0	0	0	0
snoRNA	ENSMMUG00000037268	3	8432421	8432523	+	0	0	0	0	0	0	0	0	0	0	0	0	0	0	0	0	0	0	0	0	0	0	0	0	0	0	0	0	0	0
snoRNA	ENSMMUG00000035617	3	10332698	10332802	+	0	0	0	0	0	0	0	0	0	0	0	0	0	0	0	0	0	0	0	0	0	0	0	0	0	0	0	0	0	0
snRNA	ENSMMUG00000034757	3	10506774	10506876	-	0	0	0	0	0	0	0	0	0	0	0	0	0	0	0	0	0	0	0	0	0	0	0	0	0	0	0	0	0	0
snoRNA	ENSMMUG00000034027	3	12108494	12108621	+	0	0	0	0	0	0	0	0	0	0	0	0	0	0	0	0	0	0	0	0	0	0	0	0	0	0	0	0	0	0
snoRNA	ENSMMUG00000027541	3	13697720	13697854	+	0	0	0	0	0	0	0	0	0	0	0	0	0	0	0	0	0	0	0	0	0	0	0	0	0	0	0	0	0	0
snoRNA	ENSMMUG00000024009	3	14132044	14132179	+	0	0	0	0	0	0	0	0	0	0	0	0	0	0	0	0	0	0	0	0	0	0	0	0	0	0	0	0	0	0
snoRNA	ENSMMUG00000037227	3	14844828	14845005	+	0	0	0	0	0	0	0	0	0	0	0	0	0	0	0	0	0	0	0	0	0	0	0	0	0	0	0	0	0	0
snRNA	ENSMMUG00000035114	3	15965545	15965678	-	0	0	0	0	0	0	0	0	0	0	0	0	0	0	0	0	0	0	0	0	0	0	0	0	0	0	0	0	0	0
snoRNA	ENSMMUG00000035656	3	17256018	17256121	+	0	0	0	0	0	0	0	0	0	0	0	0	0	0	0	0	0	0	0	0	0	0	0	0	0	0	0	0	0	0
snoRNA	ENSMMUG00000033200	3	17476622	17476834	+	0	0	0	0	0	0	0	0	0	0	0	0	0	0	0	0	0	0	0	0	0	0	0	0	0	0	0	0	0	0
snRNA	ENSMMUG00000036294	3	17936127	17936210	-	0	0	0	0	0	0	0	0	0	0	0	0	0	0	0	0	0	0	0	0	0	0	0	0	0	0	0	0	0	0
snRNA	ENSMMUG00000024119	3	20721185	20721289	+	0	0	0	0	0	0	0	0	0	0	0	0	0	0	0	0	0	0	0	0	0	0	0	0	0	0	0	0	0	0
snoRNA	ENSMMUG00000036496	3	21201019	21201111	+	0	0	0	0	0	0	0	0	0	0	0	0	0	0	0	0	0	0	0	0	0	0	0	0	0	0	0	0	0	0
snRNA	ENSMMUG00000028023	3	24627517	24627657	-	0	0	0	0	0	0	0	0	0	0	0	0	0	0	0	0	0	0	0	0	0	0	0	0	0	0	0	0	0	0
snRNA	ENSMMUG00000035981	3	26280829	26280996	-	0	0	0	0	0	0	0	0	0	0	0	0	0	0	0	0	0	0	0	0	0	0	0	0	0	0	0	0	0	0
snRNA	ENSMMUG00000036921	3	26561884	26561988	+	0	0	0	0	0	0	0	0	0	0	0	0	0	0	0	0	0	0	0	0	0	0	0	0	0	0	0	0	0	0
snRNA	ENSMMUG00000028120	3	28967781	28967887	-	0	0	0	0	0	0	0	0	0	0	0	0	0	0	0	0	0	0	0	0	0	0	0	0	0	0	0	0	0	0
snRNA	ENSMMUG00000036478	3	29482367	29482433	-	0	0	0	0	0	0	0	0	0	0	0	0	0	0	0	0	0	0	0	0	0	0	0	0	0	0	0	0	0	0
tRNA	tRNA-Gly-GCC-5-1	3	29559600	29559671	-	0	0	0	0	0	0	0	0	0	0	0	0	0	0	0	0	0	0	0	0	0	0	0	0	0	0	0	0	0	0
snRNA	ENSMMUG00000026830	3	30191788	30191947	-	0	0	0	0	0	0	0	0	0	0	0	0	0	0	0	0	0	0	0	0	0	0	0	0	0	0	0	0	0	0
snoRNA	ENSMMUG00000032866	3	30610024	30610095	+	0	0	0	0	0	0	0	0	0	0	0	0	0	0	0	0	0	0	0	0	0	0	0	0	0	0	0	0	0	0
snoRNA	ENSMMUG00000036251	3	31185261	31185364	-	0	0	0	0	0	0	0	0	0	0	0	0	0	0	0	0	0	0	0	0	0	0	0	0	0	0	0	0	0	0
snRNA	ENSMMUG00000034278	3	31282715	31282821	-	0	0	0	0	0	0	0	0	0	0	0	0	0	0	0	0	0	0	0	0	0	0	0	0	0	0	0	0	0	0
snoRNA	ENSMMUG00000036880	3	40664790	40664885	+	0	0	0	0	0	0	0	0	0	0	0	0	0	0	0	0	0	0	0	0	0	0	0	0	0	0	0	0	0	0
snoRNA	ENSMMUG00000035553	3	42686889	42686996	+	0	0	0	0	0	0	0	0	0	0	0	0	0	0	0	0	0	0	0	0	0	0	0	0	0	0	0	0	0	0
snRNA	ENSMMUG00000037024	3	43842811	43842916	-	0	0	0	0	0	0	0	0	0	0	0	0	0	0	0	0	0	0	0	0	0	0	0	0	0	0	0	0	0	0
snoRNA	ENSMMUG00000023964	3	44195680	44195815	+	0	0	0	0	0	0	0	0	0	0	0	0	0	0	0	0	0	0	0	0	0	0	0	0	0	0	0	0	0	0
snoRNA	ENSMMUG00000035474	3	46080899	46081002	-	0	0	0	0	0	0	0	0	0	0	0	0	0	0	0	0	0	0	0	0	0	0	0	0	0	0	0	0	0	0
snoRNA	ENSMMUG00000035756	3	46624758	46624861	-	0	0	0	0	0	0	0	0	0	0	0	0	0	0	0	0	0	0	0	0	0	0	0	0	0	0	0	0	0	0
tRNA	tRNA-Trp-CCA-3-1	3	47099527	47099599	+	0	0	0	0	0	0	0	0	0	0	0	0	0	0	0	0	0	0	0	0	0	0	0	0	0	0	0	0	0	0
tRNA	tRNA-Trp-CCA-5-1	3	47100786	47100858	+	0	0	0	0	0	0	0	0	0	0	0	0	0	0	0	0	0	0	0	0	0	0	0	0	0	0	0	0	0	0
snRNA	ENSMMUG00000023940	3	48562982	48563080	-	0	0	0	0	0	0	0	0	0	0	0	0	0	0	0	0	0	0	0	0	0	0	0	0	0	0	0	0	0	0
snoRNA	ENSMMUG00000036166	3	49503701	49503789	-	0	0	0	0	0	0	0	0	0	0	0	0	0	0	0	0	0	0	0	0	0	0	0	0	0	0	0	0	0	0
snoRNA	ENSMMUG00000025279	3	50332300	50332434	-	0	0	0	0	0	0	0	0	0	0	0	0	0	0	0	0	0	0	0	0	0	0	0	0	0	0	0	0	0	0
snRNA	ENSMMUG00000028148	3	50856159	50856266	-	0	0	0	0	0	0	0	0	0	0	0	0	0	0	0	0	0	0	0	0	0	0	0	0	0	0	0	0	0	0
snRNA	ENSMMUG00000037014	3	51022569	51022675	+	0	0	0	0	0	0	0	0	0	0	0	0	0	0	0	0	0	0	0	0	0	0	0	0	0	0	0	0	0	0
snRNA	ENSMMUG00000036899	3	51704969	51705032	-	0	0	0	0	0	0	0	0	0	0	0	0	0	0	0	0	0	0	0	0	0	0	0	0	0	0	0	0	0	0
tRNA	tRNA-Ser-TGA-12-1	3	53744203	53744272	-	0	0	0	0	0	0	0	0	0	0	0	0	0	0	0	0	0	0	0	0	0	0	0	0	0	0	0	0	0	0
snRNA	ENSMMUG00000028387	3	54296912	54297018	+	0	0	0	0	0	0	0	0	0	0	0	0	0	0	0	0	0	0	0	0	0	0	0	0	0	0	0	0	0	0
snRNA	ENSMMUG00000037443	3	54363454	54363514	+	0	0	0	0	0	0	0	0	0	0	0	0	0	0	0	0	0	0	0	0	0	0	0	0	0	0	0	0	0	0
snRNA	ENSMMUG00000036872	3	54595370	54595469	-	0	0	0	0	0	0	0	0	0	0	0	0	0	0	0	0	0	0	0	0	0	0	0	0	0	0	0	0	0	0
tRNA	tRNA-Ser-TGA-11-1	3	55038401	55038470	+	0	0	0	0	0	0	0	0	0	0	0	0	0	0	0	0	0	0	0	0	0	0	0	0	0	0	0	0	0	0
tRNA	tRNA-Tyr-GTA-23-1	3	55040321	55040388	+	0	0	0	0	0	0	0	0	0	0	0	0	0	0	0	0	0	0	0	0	0	0	0	0	0	0	0	0	0	0
snRNA	ENSMMUG00000028501	3	58156429	58156532	-	0	0	0	0	0	0	0	0	0	0	0	0	0	0	0	0	0	0	0	0	0	0	0	0	0	0	0	0	0	0
snoRNA	ENSMMUG00000036923	3	58238835	58238945	+	0	0	0	0	0	0	0	0	0	0	0	0	0	0	0	0	0	0	0	0	0	0	0	0	0	0	0	0	0	0
snRNA	ENSMMUG00000026540	3	58516380	58516483	-	0	0	0	0	0	0	0	0	0	0	0	0	0	0	0	0	0	0	0	0	0	0	0	0	0	0	0	0	0	0
snRNA	ENSMMUG00000036547	3	58570826	58570938	-	0	0	0	0	0	0	0	0	0	0	0	0	0	0	0	0	0	0	0	0	0	0	0	0	0	0	0	0	0	0
snRNA	ENSMMUG00000027807	3	59167329	59167435	+	0	0	0	0	0	0	0	0	0	0	0	0	0	0	0	0	0	0	0	0	0	0	0	0	0	0	0	0	0	0
snRNA	ENSMMUG00000024477	3	59214129	59214233	-	0	0	0	0	0	0	0	0	0	0	0	0	0	0	0	0	0	0	0	0	0	0	0	0	0	0	0	0	0	0
snoRNA	ENSMMUG00000027587	3	59273154	59273288	-	0	0	0	0	0	0	0	0	0	0	0	0	0	0	0	0	0	0	0	0	0	0	0	0	0	0	0	0	0	0
snRNA	ENSMMUG00000027622	3	59380538	59380644	+	0	0	0	0	0	0	0	0	0	0	0	0	0	0	0	0	0	0	0	0	0	0	0	0	0	0	0	0	0	0
snoRNA	ENSMMUG00000036889	3	60269937	60270010	-	0	0	0	0	0	0	0	0	0	0	0	0	0	0	0	0	0	0	0	0	0	0	0	0	0	0	0	0	0	0
snoRNA	ENSMMUG00000035897	3	60270268	60270363	-	0	0	0	0	0	0	0	0	0	0	0	0	0	0	0	0	0	0	0	0	0	0	0	0	0	0	0	0	0	0
snoRNA	ENSMMUG00000035735	3	60323154	60323223	-	0	0	0	0	0	0	0	0	0	0	0	0	0	0	0	0	0	0	0	0	0	0	0	0	0	0	0	0	0	0
snRNA	ENSMMUG00000024332	3	69392093	69392199	+	0	0	0	0	0	0	0	0	0	0	0	0	0	0	0	0	0	0	0	0	0	0	0	0	0	0	0	0	0	0
snoRNA	ENSMMUG00000037152	3	70026467	70026558	-	0	0	0	0	0	0	0	0	0	0	0	0	0	0	0	0	0	0	0	0	0	0	0	0	0	0	0	0	0	0
snoRNA	ENSMMUG00000025393	3	70066869	70067003	-	0	0	0	0	0	0	0	0	0	0	0	0	0	0	0	0	0	0	0	0	0	0	0	0	0	0	0	0	0	0
snoRNA	ENSMMUG00000025184	3	70071931	70072064	-	0	0	0	0	0	0	0	0	0	0	0	0	0	0	0	0	0	0	0	0	0	0	0	0	0	0	0	0	0	0
snRNA	ENSMMUG00000032976	3	70529106	70529209	+	0	0	0	0	0	0	0	0	0	0	0	0	0	0	0	0	0	0	0	0	0	0	0	0	0	0	0	0	0	0
snoRNA	ENSMMUG00000036536	3	71480704	71480834	-	0	0	0	0	0	0	0	0	0	0	0	0	0	0	0	0	0	0	0	0	0	0	0	0	0	0	0	0	0	0
snRNA	ENSMMUG00000028015	3	71722409	71722515	-	0	0	0	0	0	0	0	0	0	0	0	0	0	0	0	0	0	0	0	0	0	0	0	0	0	0	0	0	0	0
snoRNA	ENSMMUG00000035978	3	71976041	71976144	-	0	0	0	0	0	0	0	0	0	0	0	0	0	0	0	0	0	0	0	0	0	0	0	0	0	0	0	0	0	0
snRNA	ENSMMUG00000036292	3	72339361	72339418	-	0	0	0	0	0	0	0	0	0	0	0	0	0	0	0	0	0	0	0	0	0	0	0	0	0	0	0	0	0	0
snRNA	ENSMMUG00000025475	3	72624179	72624332	+	0	0	0	0	0	0	0	0	0	0	0	0	0	0	0	0	0	0	0	0	0	0	0	0	0	0	0	0	0	0
snRNA	ENSMMUG00000035313	3	73064318	73064475	+	0	0	0	0	0	0	0	0	0	0	0	0	0	0	0	0	0	0	0	0	0	0	0	0	0	0	0	0	0	0
snoRNA	ENSMMUG00000036147	3	74039559	74039650	+	0	0	0	0	0	0	0	0	0	0	0	0	0	0	0	0	0	0	0	0	0	0	0	0	0	0	0	0	0	0
snoRNA	ENSMMUG00000036439	3	74097583	74097715	+	0	0	0	0	0	0	0	0	0	0	0	0	0	0	0	0	0	0	0	0	0	0	0	0	0	0	0	0	0	0
snoRNA	ENSMMUG00000024461	3	75429010	75429153	+	0	0	0	0	0	0	0	0	0	0	0	0	0	0	0	0	0	0	0	0	0	0	0	0	0	0	0	0	0	0
snRNA	ENSMMUG00000025938	3	75915975	75916078	-	0	0	0	0	0	0	0	0	0	0	0	0	0	0	0	0	0	0	0	0	0	0	0	0	0	0	0	0	0	0
snRNA	ENSMMUG00000036663	3	80527070	80527131	+	0	0	0	0	0	0	0	0	0	0	0	0	0	0	0	0	0	0	0	0	0	0	0	0	0	0	0	0	0	0
snoRNA	ENSMMUG00000026577	3	81241455	81241588	+	0	0	0	0	0	0	0	0	0	0	0	0	0	0	0	0	0	0	0	0	0	0	0	0	0	0	0	0	0	0
snoRNA	ENSMMUG00000026102	3	81242514	81242649	+	0	0	0	0	0	0	0	0	0	0	0	0	0	0	0	0	0	0	0	0	0	0	0	0	0	0	0	0	0	0
snoRNA	ENSMMUG00000024815	3	81243067	81243200	+	0	0	0	0	0	0	0	0	0	0	0	0	0	0	0	0	0	0	0	0	0	0	0	0	0	0	0	0	0	0
snoRNA	ENSMMUG00000024346	3	81364133	81364265	+	0	0	1	0	0	0	0	0	0	0	0	0	0	0	0	0	0	0	0	0	0	0	0	0	0	0	0	0	1	0
snRNA	ENSMMUG00000025917	3	81841904	81842010	+	0	0	0	0	0	0	0	0	0	0	0	0	0	0	0	0	0	0	0	0	0	0	0	0	0	0	0	0	0	0
snRNA	ENSMMUG00000035562	3	83063157	83063257	+	0	0	0	0	0	0	0	0	0	0	0	0	0	0	0	0	0	0	0	0	0	0	0	0	0	0	0	0	0	0
snRNA	ENSMMUG00000037237	3	83076044	83076105	-	0	0	0	0	0	0	0	0	0	0	0	0	0	0	0	0	0	0	0	0	0	0	0	0	0	0	0	0	0	0
snoRNA	ENSMMUG00000024995	3	86928804	86928917	+	0	0	0	0	0	0	0	0	0	0	0	0	0	0	0	0	0	0	0	0	0	0	0	0	0	0	0	0	0	0
snoRNA	ENSMMUG00000035942	3	89076921	89077022	+	0	0	0	0	0	0	0	0	0	0	0	0	0	0	0	0	0	0	0	0	0	0	0	0	0	0	0	0	0	0
snoRNA	ENSMMUG00000036627	3	91271364	91271496	-	0	0	0	0	0	0	0	0	0	0	0	0	0	0	0	0	0	0	0	0	0	0	0	0	0	0	0	0	0	0
snRNA	ENSMMUG00000025841	3	91855909	91856011	+	0	0	0	0	0	0	0	0	0	0	0	0	0	0	0	0	0	0	0	0	0	0	0	0	0	0	0	0	0	0
snoRNA	ENSMMUG00000036086	3	93047819	93047891	+	0	0	0	0	0	0	0	0	0	0	0	0	0	0	0	0	0	0	0	0	0	0	0	0	0	0	0	0	0	0
snRNA	ENSMMUG00000037205	3	93162847	93162951	+	0	0	0	0	0	0	0	0	0	0	0	0	0	0	0	0	0	0	0	0	0	0	0	0	0	0	0	0	0	0
snRNA	ENSMMUG00000027431	3	93757126	93757232	-	0	0	0	0	0	0	0	0	0	0	0	0	0	0	0	0	0	0	0	0	0	0	0	0	0	0	0	0	0	0
snRNA	ENSMMUG00000035975	3	95926667	95926804	+	0	0	0	0	0	0	0	0	0	0	0	0	0	0	0	0	0	0	0	0	0	0	0	0	0	0	0	0	0	0
snoRNA	ENSMMUG00000036407	3	96293063	96293166	-	0	0	0	0	0	0	0	0	0	0	0	0	0	0	0	0	0	0	0	0	0	0	0	0	0	0	0	0	0	0
snRNA	ENSMMUG00000028511	3	98102148	98102254	+	0	0	0	0	0	0	0	0	0	0	0	0	0	0	0	0	0	0	0	0	0	0	0	0	0	0	0	0	0	0
snoRNA	ENSMMUG00000033216	3	100985302	100985526	-	0	0	0	0	0	0	0	0	0	0	0	0	0	0	0	0	0	0	0	0	0	0	0	0	0	0	0	0	0	0
snRNA	ENSMMUG00000028419	3	101720908	101721014	-	0	0	0	0	0	0	0	0	0	0	0	0	0	0	0	0	0	0	0	0	0	0	0	0	0	0	0	0	0	0
snoRNA	ENSMMUG00000037018	3	102000528	102000631	+	0	0	0	0	0	0	0	0	0	0	0	0	0	0	0	0	0	0	0	0	0	0	0	0	0	0	0	0	0	0
snoRNA	ENSMMUG00000036639	3	102341217	102341322	+	0	0	0	0	0	0	0	0	0	0	0	0	0	0	0	0	0	0	0	0	0	0	0	0	0	0	0	0	0	0
snRNA	ENSMMUG00000037037	3	102784531	102784595	-	0	0	0	0	0	0	0	0	0	0	0	0	0	0	0	0	0	0	0	0	0	0	0	0	0	0	0	0	0	0
snoRNA	ENSMMUG00000033015	3	102836923	102836993	-	0	0	0	0	0	0	0	0	0	0	0	0	0	0	0	0	0	0	0	0	0	0	0	0	0	0	0	0	0	0
snoRNA	ENSMMUG00000033837	3	103382218	103382291	-	34	64	73	37	50	49	49	37	64	64	49	88	33	42	16	31	40	33	49	46	133	13	41	31	40	53	44	45	71	51
snRNA	ENSMMUG00000025035	3	104813635	104813788	-	0	0	0	0	0	0	0	0	0	0	0	0	0	0	0	0	0	0	0	0	0	0	0	0	0	0	0	0	0	0
snoRNA	ENSMMUG00000026507	3	105788742	105788812	-	0	0	0	0	0	0	0	0	0	0	0	0	0	0	0	0	0	0	0	0	0	0	0	0	0	0	0	0	0	0
snoRNA	ENSMMUG00000026048	3	108749239	108749364	+	0	0	0	0	0	0	0	0	0	0	0	0	0	0	0	0	0	0	0	0	0	0	0	0	0	0	0	0	0	0
snoRNA	ENSMMUG00000032870	3	113474969	113475099	+	0	0	0	0	0	0	0	0	0	0	0	0	0	0	0	0	0	0	0	0	0	0	0	0	0	0	0	0	0	0
snRNA	ENSMMUG00000036998	3	113702064	113702162	+	0	0	0	0	0	0	0	0	0	0	0	0	0	0	0	0	0	0	0	0	0	0	0	0	0	0	0	0	0	0
snoRNA	ENSMMUG00000033249	3	116064624	116064833	-	0	0	0	0	0	0	0	0	0	0	0	0	0	0	0	0	0	0	0	0	0	0	0	0	0	0	0	0	0	0
snRNA	ENSMMUG00000036395	3	117979058	117979208	+	0	0	0	0	0	0	0	0	0	0	0	0	0	0	0	0	0	0	0	0	0	0	0	0	0	0	0	0	0	0
snRNA	ENSMMUG00000036937	3	118475486	118475594	-	0	0	0	0	0	0	0	0	0	0	0	0	0	0	0	0	0	0	0	0	0	0	0	0	0	0	0	0	0	0
snRNA	ENSMMUG00000036209	3	120890406	120890469	-	0	0	0	0	0	0	0	0	0	0	0	0	0	0	0	0	0	0	0	0	0	0	0	0	0	0	0	0	0	0
snRNA	ENSMMUG00000027840	3	120918924	120919030	-	0	0	0	0	0	0	0	0	0	0	0	0	0	0	0	0	0	0	0	0	0	0	0	0	0	0	0	0	0	0
snRNA	ENSMMUG00000028056	3	120929471	120929576	-	0	0	0	0	0	0	0	0	0	0	0	0	0	0	0	0	0	0	0	0	0	0	0	0	0	0	0	0	0	0
snoRNA	ENSMMUG00000035485	3	121988927	121989025	-	0	0	0	0	0	0	0	0	0	0	0	0	0	0	0	0	0	0	0	0	0	0	0	0	0	0	0	0	0	0
snRNA	ENSMMUG00000028126	3	122166417	122166557	-	0	0	0	0	0	0	0	0	0	0	0	0	0	0	0	0	0	0	0	0	0	0	0	0	0	0	0	0	0	0
snRNA	ENSMMUG00000036266	3	122767445	122767550	-	0	0	0	0	0	0	0	0	0	0	0	0	0	0	0	0	0	0	0	0	0	0	0	0	0	0	0	0	0	0
snoRNA	ENSMMUG00000037403	3	126591404	126591508	+	0	0	0	0	0	0	0	0	0	0	0	0	0	0	0	0	0	0	0	0	0	0	0	0	0	0	0	0	0	0
snRNA	ENSMMUG00000028411	3	127492400	127492506	+	0	0	0	0	0	0	0	0	0	0	0	0	0	0	0	0	0	0	0	0	0	0	0	0	0	0	0	0	0	0
snoRNA	ENSMMUG00000035791	3	127601650	127601728	+	0	0	0	0	0	0	0	0	0	0	0	0	0	0	0	0	0	0	0	0	0	0	0	0	0	0	0	0	0	0
snoRNA	ENSMMUG00000025556	3	128821370	128821508	+	0	0	0	0	0	0	0	0	0	0	0	0	0	0	0	0	0	0	0	0	0	0	0	0	0	0	0	0	0	0
snoRNA	ENSMMUG00000036972	3	129611659	129611760	-	0	0	0	0	0	0	0	0	0	0	0	0	0	0	0	0	0	0	0	0	0	0	0	0	0	0	0	0	0	0
snRNA	ENSMMUG00000027996	3	137369841	137369947	+	0	0	0	0	0	0	0	0	0	0	0	0	0	0	0	0	0	0	0	0	0	0	0	0	0	0	0	0	0	0
snRNA	ENSMMUG00000032747	3	137951403	137951509	+	0	0	0	0	0	0	0	0	0	0	0	0	0	0	0	0	0	0	0	0	0	0	0	0	0	0	0	0	0	0
snRNA	ENSMMUG00000032842	3	138271722	138271827	-	0	0	0	0	0	0	0	0	0	0	0	0	0	0	0	0	0	0	0	0	0	0	0	0	0	0	0	0	0	0
snoRNA	ENSMMUG00000035812	3	139925432	139925537	+	0	0	0	0	0	0	0	0	0	0	0	0	0	0	0	0	0	0	0	0	0	0	0	0	0	0	0	0	0	0
snRNA	ENSMMUG00000036741	3	140315405	140315510	+	0	0	0	0	0	0	0	0	0	0	0	0	0	0	0	0	0	0	0	0	0	0	0	0	0	0	0	0	0	0
snoRNA	ENSMMUG00000036162	3	142371092	142371163	+	0	0	0	0	0	0	0	0	0	0	0	0	0	0	0	0	0	0	0	0	0	0	0	0	0	0	0	0	0	0
snRNA	ENSMMUG00000026608	3	142749357	142749460	+	0	0	0	0	0	0	0	0	0	0	0	0	0	0	0	0	0	0	0	0	0	0	0	0	0	0	0	0	0	0
snRNA	ENSMMUG00000035563	3	143630561	143630668	+	0	0	0	0	0	0	0	0	0	0	0	0	0	0	0	0	0	0	0	0	0	0	0	0	0	0	0	0	0	0
snoRNA	ENSMMUG00000036250	3	145027194	145027337	+	0	0	0	0	0	0	0	0	0	0	0	0	0	0	0	0	0	0	0	0	0	0	0	0	0	0	0	0	0	0
snoRNA	ENSMMUG00000033822	3	145418260	145418444	-	0	0	0	0	0	0	0	0	0	0	0	0	0	0	0	0	0	0	0	0	0	0	0	0	0	0	0	0	0	0
snRNA	ENSMMUG00000036692	3	145697203	145697264	+	0	0	0	0	0	0	0	0	0	0	0	0	0	0	0	0	0	0	0	0	0	0	0	0	0	0	0	0	0	0
snRNA	ENSMMUG00000027651	3	146813914	146814020	-	0	0	0	0	0	0	0	0	0	0	0	0	0	0	0	0	0	0	0	0	0	0	0	0	0	0	0	0	0	0
snoRNA	ENSMMUG00000036009	3	148527712	148527796	-	0	0	0	0	0	0	0	0	0	0	0	0	0	0	0	0	0	0	0	0	0	0	0	0	0	0	0	0	0	0
snoRNA	ENSMMUG00000025627	3	152959730	152959857	-	0	0	0	0	0	0	0	0	0	0	0	0	0	0	0	0	0	0	0	0	0	0	0	0	0	0	0	0	0	0
snoRNA	ENSMMUG00000035566	3	153788148	153788236	+	0	0	0	0	0	0	0	0	0	0	0	0	0	0	0	0	0	0	0	0	0	0	0	0	0	0	0	0	0	0
snRNA	ENSMMUG00000036350	3	154073731	154073782	-	0	0	0	0	0	0	0	0	0	0	0	0	0	0	0	0	0	0	0	0	0	0	0	0	0	0	0	0	0	0
snRNA	ENSMMUG00000025345	3	157523499	157523662	-	0	0	0	0	0	0	0	0	0	0	0	0	0	0	0	0	0	0	0	0	0	0	0	0	0	0	0	0	0	0
snRNA	ENSMMUG00000032971	3	158194899	158195005	+	0	0	0	0	0	0	0	0	0	0	0	0	0	0	0	0	0	0	0	0	0	0	0	0	0	0	0	0	0	0
snRNA	ENSMMUG00000025421	3	158721116	158721222	-	0	0	0	0	0	0	0	0	0	0	0	0	0	0	0	0	0	0	0	0	0	0	0	0	0	0	0	0	0	0
snRNA	ENSMMUG00000037080	3	159608410	159608471	+	0	0	0	0	0	0	0	0	0	0	0	0	0	0	0	0	0	0	0	0	0	0	0	0	0	0	0	0	0	0
snRNA	ENSMMUG00000034369	3	164898082	164898252	+	0	0	0	0	0	0	0	0	0	0	0	0	0	0	0	0	0	0	0	0	0	0	0	0	0	0	0	0	0	0
snRNA	ENSMMUG00000037001	3	165878515	165878576	+	0	0	0	0	0	0	0	0	0	0	0	0	0	0	0	0	0	0	0	0	0	0	0	0	0	0	0	0	0	0
snRNA	ENSMMUG00000035723	3	165970825	165970886	-	0	0	0	0	0	0	0	0	0	0	0	0	0	0	0	0	0	0	0	0	0	0	0	0	0	0	0	0	0	0
snRNA	ENSMMUG00000035504	3	166033647	166033714	-	0	0	0	0	0	0	0	0	0	0	0	0	0	0	0	0	0	0	0	0	0	0	0	0	0	0	0	0	0	0
snoRNA	ENSMMUG00000035934	3	166396523	166396626	+	0	0	0	0	0	0	0	0	0	0	0	0	0	0	0	0	0	0	0	0	0	0	0	0	0	0	0	0	0	0
snRNA	ENSMMUG00000025824	3	166829511	166829663	+	0	0	0	0	0	0	0	0	0	0	0	0	0	0	0	0	0	0	0	0	0	0	0	0	0	0	0	0	0	0
tRNA	tRNA-Pro-AGG-1-1	3	167641735	167641807	+	0	0	0	0	0	0	0	0	0	0	0	0	0	0	0	0	0	0	0	0	0	0	0	0	0	0	0	0	0	0
snoRNA	ENSMMUG00000037385	3	167701043	167701146	+	0	0	0	0	0	0	0	0	0	0	0	0	0	0	0	0	0	0	0	0	0	0	0	0	0	0	0	0	0	0
snoRNA	ENSMMUG00000036468	3	167728651	167728754	+	0	0	0	0	0	0	0	0	0	0	0	0	0	0	0	0	0	0	0	0	0	0	0	0	0	0	0	0	0	0
snRNA	ENSMMUG00000035162	3	168438100	168438206	-	0	0	0	0	0	0	0	0	0	0	0	0	0	0	0	0	0	0	0	0	0	0	0	0	0	0	0	0	0	0
snoRNA	ENSMMUG00000035802	3	169303147	169303238	-	0	0	0	0	0	0	0	0	0	0	0	0	0	0	0	0	0	0	0	0	0	0	0	0	0	0	0	0	0	0
snoRNA	ENSMMUG00000025903	3	170180626	170180730	+	0	0	0	0	0	0	0	0	0	0	0	0	0	0	0	0	0	0	0	0	0	0	0	0	0	0	0	0	0	0
snRNA	ENSMMUG00000037352	3	170506492	170506595	+	0	0	0	0	0	0	0	0	0	0	0	0	0	0	0	0	0	0	0	0	0	0	0	0	0	0	0	0	0	0
snRNA	ENSMMUG00000024362	3	173181850	173181953	-	0	0	0	0	0	0	0	0	0	0	0	0	0	0	0	0	0	0	0	0	0	0	0	0	0	0	0	0	0	0
snRNA	ENSMMUG00000024374	3	173472327	173472433	+	0	0	0	0	0	0	0	0	0	0	0	0	0	0	0	0	0	0	0	0	0	0	0	0	0	0	0	0	0	0
snoRNA	ENSMMUG00000037105	3	174343867	174343970	-	0	0	0	0	0	0	0	0	0	0	0	0	0	0	0	0	0	0	0	0	0	0	0	0	0	0	0	0	0	0
snoRNA	ENSMMUG00000033244	3	174786021	174786098	+	0	0	0	0	0	0	0	0	0	0	0	0	0	0	0	0	0	0	0	0	0	0	0	0	0	0	0	0	0	0
snoRNA	ENSMMUG00000036362	3	175630301	175630404	+	0	0	0	0	0	0	0	0	0	0	0	0	0	0	0	0	0	0	0	0	0	0	0	0	0	0	0	0	0	0
snoRNA	ENSMMUG00000026144	3	175689691	175689822	-	0	0	0	0	0	0	0	0	0	0	0	0	0	0	0	0	0	0	0	0	0	0	0	0	0	0	0	0	0	0
snoRNA	ENSMMUG00000035616	3	175976182	175976285	-	0	0	0	0	0	0	0	0	0	0	0	0	0	0	0	0	0	0	0	0	0	0	0	0	0	0	0	0	0	0
snRNA	ENSMMUG00000025871	3	176361096	176361199	-	0	0	0	0	0	0	0	0	0	0	0	0	0	0	0	0	0	0	0	0	0	0	0	0	0	0	0	0	0	0
snRNA	ENSMMUG00000025030	3	177701381	177701489	-	0	0	0	0	0	0	0	0	0	0	0	0	0	0	0	0	0	0	0	0	0	0	0	0	0	0	0	0	0	0
snRNA	ENSMMUG00000024050	3	177735399	177735561	+	0	0	0	0	0	0	0	0	0	0	0	0	0	0	0	0	0	0	0	0	0	0	0	0	0	0	0	0	0	0
snRNA	ENSMMUG00000035157	3	178529669	178529819	+	0	0	0	0	0	0	0	0	0	0	0	0	0	0	0	0	0	0	0	0	0	0	0	0	0	0	0	0	0	0
tRNA	tRNA-Arg-CCT-5-1	3	178660916	178660989	+	0	0	0	0	0	0	0	0	0	0	0	0	0	0	0	0	0	0	0	0	0	0	0	0	0	0	0	0	0	0
snRNA	ENSMMUG00000027463	3	179206679	179206841	+	0	0	0	0	0	0	0	0	0	0	0	0	0	0	0	0	1	0	0	0	0	0	0	0	0	0	0	0	0	0
snRNA	ENSMMUG00000033241	3	181151642	181151740	+	0	0	0	0	0	0	0	0	0	0	0	0	0	0	0	0	0	0	0	0	0	0	0	0	0	0	0	0	0	0
snRNA	ENSMMUG00000036637	3	181173579	181173681	-	0	0	0	0	0	0	0	0	0	0	0	0	0	0	0	0	0	0	0	0	0	0	0	0	0	0	0	0	0	0
snRNA	ENSMMUG00000034319	3	181609479	181609577	+	0	0	0	0	0	0	0	0	0	0	0	0	0	0	0	0	0	0	0	0	0	0	0	0	0	0	0	0	0	0
snRNA	ENSMMUG00000033944	3	181761342	181761440	+	0	0	0	0	0	0	0	0	0	0	0	0	0	0	0	0	0	0	0	0	0	0	0	0	0	0	0	0	0	0
snoRNA	ENSMMUG00000027695	3	185681941	185682150	+	0	0	0	0	0	0	0	0	0	0	0	0	0	0	0	0	0	0	0	0	0	0	0	0	0	0	0	0	0	0
snRNA	ENSMMUG00000034712	3	186352434	186352546	+	0	0	0	0	0	0	0	0	0	0	0	0	0	0	0	0	0	0	0	0	0	0	0	0	0	0	0	0	0	0
snoRNA	ENSMMUG00000035692	3	186608300	186608369	-	0	0	0	0	0	0	0	0	0	0	0	0	0	0	0	0	0	0	0	0	0	0	0	0	0	0	0	0	0	0
snRNA	ENSMMUG00000027697	3	186978997	186979103	-	0	0	0	0	0	0	0	0	0	0	0	0	0	0	0	0	0	0	0	0	0	0	0	0	0	0	0	0	0	0
tRNA	tRNA-Cys-GCA-1-1	3	188658953	188659025	+	0	0	0	0	0	0	0	0	0	0	0	0	0	0	0	0	0	0	0	0	0	0	0	0	0	0	0	0	0	0
tRNA	tRNA-Cys-GCA-6-2	3	188678352	188678424	+	0	0	0	0	0	0	0	0	0	0	0	0	0	0	0	0	0	0	0	0	0	0	0	0	0	0	0	0	0	0
tRNA	tRNA-Cys-GCA-11-1	3	188697245	188697317	-	0	0	0	0	0	0	0	0	0	0	0	0	0	0	0	0	0	0	0	0	0	0	0	0	0	0	0	0	0	0
tRNA	tRNA-Cys-GCA-19-1	3	188699342	188699403	-	0	0	0	0	0	0	0	0	0	0	0	0	0	0	0	0	0	0	0	0	0	0	0	0	0	0	0	0	0	0
tRNA	tRNA-Cys-GCA-6-3	3	188714819	188714891	-	0	0	0	0	0	0	0	0	0	0	0	0	0	0	0	0	0	0	0	0	0	0	0	0	0	0	0	0	0	0
tRNA	tRNA-Cys-GCA-6-4	3	188716552	188716624	-	0	0	0	0	0	0	0	0	0	0	0	0	0	0	0	0	0	0	0	0	0	0	0	0	0	0	0	0	0	0
tRNA	tRNA-Cys-GCA-20-1	3	188746683	188746755	-	0	0	0	0	0	0	0	0	0	0	0	0	0	0	0	0	0	0	0	0	0	0	0	0	0	0	0	0	0	0
tRNA	tRNA-Cys-GCA-5-1	3	188755744	188755816	-	0	0	0	0	0	0	0	0	0	0	0	0	0	0	0	0	0	0	0	0	0	0	0	0	0	0	0	0	0	0
snRNA	ENSMMUG00000033136	3	188864681	188864787	+	0	0	0	0	0	0	0	0	0	0	0	0	0	0	0	0	0	0	0	0	0	0	0	0	0	0	0	0	0	0
tRNA	tRNA-Cys-GCA-16-1	3	188890239	188890311	+	0	0	0	0	0	0	0	0	0	0	0	0	0	0	0	0	0	0	0	0	0	0	0	0	0	0	0	0	0	0
tRNA	tRNA-Cys-GCA-11-2	3	188898516	188898588	+	0	0	0	0	0	0	0	0	0	0	0	0	0	0	0	0	0	0	0	0	0	0	0	0	0	0	0	0	0	0
tRNA	tRNA-Tyr-GTA-10-1	3	188899836	188899909	+	0	0	0	0	0	0	0	0	0	0	0	0	0	0	0	0	0	0	0	0	0	0	0	0	0	0	0	0	0	0
tRNA	tRNA-Cys-GCA-15-1	3	188919581	188919653	+	0	0	0	0	0	0	0	0	0	0	0	0	0	0	0	0	0	0	0	0	0	0	0	0	0	0	0	0	0	0
tRNA	tRNA-Cys-GCA-4-1	3	188923498	188923570	-	0	0	0	0	0	0	0	0	0	0	0	0	0	0	0	0	0	0	0	0	0	0	0	0	0	0	0	0	0	0
tRNA	tRNA-Cys-ACA-1-1	3	188940075	188940145	+	0	0	0	0	0	0	0	0	0	0	0	0	0	0	0	0	0	0	0	0	0	0	0	0	0	0	0	0	0	0
tRNA	tRNA-Cys-GCA-9-1	3	188955214	188955286	+	0	0	0	0	0	0	0	0	0	0	0	0	0	0	0	0	0	0	0	0	0	0	0	0	0	0	0	0	0	0
tRNA	tRNA-Cys-GCA-14-1	3	188967632	188967705	-	0	0	0	0	0	0	0	0	0	0	0	0	0	0	0	0	0	0	0	0	0	0	0	0	0	0	0	0	0	0
tRNA	tRNA-Cys-GCA-8-1	3	188986328	188986400	+	0	0	0	0	0	0	0	0	0	0	0	0	0	0	0	0	0	0	0	0	0	0	0	0	0	0	0	0	0	0
snoRNA	ENSMMUG00000036891	3	189017343	189017448	-	0	0	0	0	0	0	0	0	0	0	0	0	0	0	0	0	0	0	0	0	0	0	0	0	0	0	0	0	0	0
tRNA	tRNA-Cys-GCA-8-2	3	189019926	189019998	-	0	0	0	0	0	0	0	0	0	0	0	0	0	0	0	0	0	0	0	0	0	0	0	0	0	0	0	0	0	0
tRNA	tRNA-Cys-GCA-6-5	3	189036348	189036420	+	0	0	0	0	0	0	0	0	0	0	0	0	0	0	0	0	0	0	0	0	0	0	0	0	0	0	0	0	0	0
snoRNA	ENSMMUG00000036996	3	189530695	189530801	+	0	0	0	0	0	0	0	0	0	0	0	0	0	0	0	0	0	0	0	0	0	0	0	0	0	0	0	0	0	0
snoRNA	ENSMMUG00000033913	3	189544160	189544288	+	0	0	0	0	0	0	0	0	0	0	0	0	0	0	0	0	0	0	0	0	0	0	0	0	0	0	0	0	0	0
snoRNA	ENSMMUG00000035568	4	1066235	1066337	+	0	0	0	0	0	0	0	0	0	0	0	0	0	0	0	0	0	0	0	0	0	0	0	0	0	0	0	0	0	0
snoRNA	ENSMMUG00000037321	4	3940704	3940788	+	0	0	0	0	0	0	0	0	0	0	0	0	0	0	0	0	0	0	0	0	0	0	0	0	0	0	0	0	0	0
snoRNA	ENSMMUG00000037356	4	4515056	4515148	+	0	0	0	0	0	0	0	0	0	0	0	0	0	0	0	0	0	0	0	0	0	0	0	0	0	0	0	0	0	0
snoRNA	ENSMMUG00000036427	4	6951478	6951564	-	0	0	0	0	0	0	0	0	0	0	0	0	0	0	0	0	0	0	0	0	0	0	0	0	0	0	0	0	0	0
snoRNA	ENSMMUG00000035840	4	7437254	7437311	+	0	0	0	0	0	0	0	0	0	0	0	0	0	0	0	0	0	0	0	0	0	0	0	0	0	0	0	0	0	0
snoRNA	ENSMMUG00000036149	4	7526386	7526489	-	0	0	0	0	0	0	0	0	0	0	0	0	0	0	0	0	0	0	0	0	0	0	0	0	0	0	0	0	0	0
snRNA	ENSMMUG00000033717	4	10155394	10155519	+	0	0	0	0	0	0	0	0	0	0	0	0	0	0	0	0	0	0	0	0	0	0	0	0	0	0	0	0	0	0
snoRNA	ENSMMUG00000035437	4	11046688	11046791	+	0	0	0	0	0	0	0	0	0	0	0	0	0	0	0	0	0	0	0	0	0	0	0	0	0	0	0	0	0	0
snRNA	ENSMMUG00000024001	4	11469758	11469921	-	0	0	0	0	0	0	0	0	0	0	0	0	0	0	0	0	0	0	0	0	0	0	0	0	0	0	0	0	0	0
snoRNA	ENSMMUG00000025599	4	11673857	11673998	+	0	0	0	0	0	0	0	0	0	0	0	0	0	0	0	0	0	0	0	0	0	0	0	0	0	0	0	0	0	0
snRNA	ENSMMUG00000026293	4	13182453	13182613	+	0	0	0	0	0	0	0	0	0	0	0	0	0	0	0	0	0	0	0	0	0	0	0	0	0	0	0	0	0	0
snRNA	ENSMMUG00000036550	4	13652303	13652365	+	0	0	0	0	0	0	0	0	0	0	0	0	0	0	0	0	0	0	0	0	0	0	0	0	0	0	0	0	0	0
snRNA	ENSMMUG00000036186	4	14112216	14112277	+	0	0	0	0	0	0	0	0	0	0	0	0	0	0	0	0	0	0	0	0	0	0	0	0	0	0	0	0	0	0
snRNA	ENSMMUG00000027568	4	14592697	14592800	+	0	0	0	0	0	0	0	0	0	0	0	0	0	0	0	0	0	0	0	0	0	0	0	0	0	0	0	0	0	0
snRNA	ENSMMUG00000036934	4	14917668	14917730	-	0	0	0	0	0	0	0	0	0	0	0	0	0	0	0	0	0	0	0	0	0	0	0	0	0	0	0	0	0	0
snRNA	ENSMMUG00000024175	4	15268607	15268713	+	0	0	0	0	0	0	0	0	0	0	0	0	0	0	0	0	0	0	0	0	0	0	0	0	0	0	0	0	0	0
snRNA	ENSMMUG00000024870	4	15278284	15278389	-	0	0	0	0	0	0	0	0	0	0	0	0	0	0	0	0	0	0	0	0	0	0	0	0	0	0	0	0	0	0
snRNA	ENSMMUG00000035378	4	16205257	16205363	+	0	0	0	0	0	0	0	0	0	0	0	0	0	0	0	0	0	0	0	0	0	0	0	0	0	0	0	0	0	0
snRNA	ENSMMUG00000035208	4	16216209	16216315	+	0	0	0	0	0	0	0	0	0	0	0	0	0	0	0	0	0	0	0	0	0	0	0	0	0	0	0	0	0	0
snRNA	ENSMMUG00000026555	4	17681670	17681771	+	0	0	0	0	0	0	0	0	0	0	0	0	0	0	0	0	0	0	0	0	0	0	0	0	0	0	0	0	0	0
snRNA	ENSMMUG00000034685	4	18354911	18355017	-	0	0	0	0	0	0	0	0	0	0	0	0	0	0	0	0	0	0	0	0	0	0	0	0	0	0	0	0	0	0
snoRNA	ENSMMUG00000036330	4	18448693	18448788	-	0	0	0	0	0	0	0	0	0	0	0	0	0	0	0	0	0	0	0	0	0	0	0	0	0	0	0	0	0	0
snRNA	ENSMMUG00000024130	4	19646450	19646552	-	0	0	0	0	0	0	0	0	0	0	0	0	0	0	0	0	0	0	0	0	0	0	0	0	0	0	0	0	0	0
snRNA	ENSMMUG00000027369	4	20433815	20433920	-	0	0	0	0	0	0	0	0	0	0	0	0	0	0	0	0	0	0	0	0	0	0	0	0	0	0	0	0	0	0
snRNA	ENSMMUG00000032944	4	23140565	23140658	-	0	0	0	0	0	0	0	0	0	0	0	0	0	0	0	0	0	0	0	0	0	0	0	0	0	0	0	0	0	0
snoRNA	ENSMMUG00000035752	4	24173237	24173341	+	0	0	0	0	0	0	0	0	0	0	0	0	0	0	0	0	0	0	0	0	0	0	0	0	0	0	0	0	0	0
snRNA	ENSMMUG00000026352	4	24376056	24376159	+	0	0	0	0	0	0	0	0	0	0	0	0	0	0	0	0	0	0	0	0	0	0	0	0	0	0	0	0	0	0
snRNA	ENSMMUG00000027828	4	25379474	25379577	+	0	0	0	0	0	0	0	0	0	0	0	0	0	0	0	0	0	0	0	0	0	0	0	0	0	0	0	0	0	0
snoRNA	ENSMMUG00000036942	4	25431560	25431655	+	0	0	0	0	0	0	0	0	0	0	0	0	0	0	0	0	0	0	0	0	0	0	0	0	0	0	0	0	0	0
snRNA	ENSMMUG00000035650	4	26339619	26339680	-	0	0	0	0	0	0	0	0	0	0	0	0	0	0	0	0	0	0	0	0	0	0	0	0	0	0	0	0	0	0
tRNA	tRNA-iMet-CAT-1-2	4	26428497	26428569	+	0	0	0	0	0	0	0	0	0	0	0	0	0	0	0	0	0	0	0	0	0	0	0	0	0	0	0	0	0	0
tRNA	tRNA-Arg-TCG-3-1	4	26438267	26438340	+	0	0	0	0	0	0	0	0	0	0	0	0	0	0	0	0	0	0	0	0	0	0	0	0	0	0	0	0	0	0
tRNA	tRNA-Ser-GCT-3-1	4	26443896	26443978	-	0	0	0	0	0	0	0	0	0	0	0	0	0	0	0	0	0	0	0	0	0	0	0	0	0	0	0	0	0	0
tRNA	tRNA-Gln-TTG-5-1	4	26449942	26450014	-	0	0	0	0	0	0	0	0	0	0	0	0	0	0	0	0	0	0	0	0	0	0	0	0	0	0	0	0	0	0
tRNA	tRNA-Gln-TTG-3-1	4	26450497	26450569	-	0	0	0	0	0	0	0	0	0	0	0	0	0	0	0	0	0	0	0	0	0	0	0	0	0	0	0	0	0	0
tRNA	tRNA-Ser-TGA-4-1	4	26451345	26451427	-	0	0	0	0	0	0	0	0	0	0	0	0	0	0	0	0	0	0	0	0	0	0	0	0	0	0	0	0	0	0
tRNA	tRNA-iMet-CAT-1-3	4	26451871	26451943	-	0	0	0	0	0	0	0	0	0	0	0	0	0	0	0	0	0	0	0	0	0	0	0	0	0	0	0	0	0	0
tRNA	tRNA-Trp-CCA-3-2	4	26456263	26456335	-	0	0	0	0	0	0	0	0	0	0	0	0	0	0	0	0	0	0	0	0	0	0	0	0	0	0	0	0	0	0
tRNA	tRNA-Arg-TCG-2-1	4	26459727	26459800	+	0	0	0	0	0	0	0	0	0	0	0	0	0	0	0	0	0	0	0	0	0	0	0	0	0	0	0	0	0	0
tRNA	tRNA-Ser-AGA-2-1	4	26464499	26464581	+	0	0	0	0	0	0	0	0	0	0	0	0	0	0	0	0	0	0	0	0	0	0	0	0	0	0	0	0	0	0
tRNA	tRNA-Arg-ACG-1-1	4	26465043	26465116	+	0	0	0	0	0	0	0	0	0	0	0	0	0	0	0	0	0	0	0	0	0	0	0	0	0	0	0	0	0	0
tRNA	tRNA-iMet-CAT-2-1	4	26467201	26467273	-	0	0	0	0	0	0	0	0	0	0	0	0	0	0	0	0	0	0	0	0	0	0	0	0	0	0	0	0	0	0
tRNA	tRNA-Trp-CCA-2-1	4	26468345	26468417	-	0	0	0	0	0	0	0	0	0	0	0	0	0	0	0	0	0	0	0	0	0	0	0	0	0	0	0	0	0	0
snRNA	ENSMMUG00000025790	4	26553000	26553107	-	0	0	0	0	0	0	0	0	0	0	0	0	0	0	0	0	0	0	0	0	0	0	0	0	0	0	0	0	0	0
tRNA	tRNA-Leu-CAG-1-2	4	26709168	26709251	+	0	0	0	0	0	0	0	0	0	0	0	0	0	0	0	0	0	0	0	0	0	0	0	0	0	0	0	0	0	0
tRNA	tRNA-Thr-AGT-3-1	4	26720833	26720907	-	0	0	0	0	0	0	0	0	0	0	0	0	0	0	0	0	0	0	0	0	0	0	0	0	0	0	0	0	0	0
tRNA	tRNA-Arg-ACG-1-2	4	26725411	26725484	+	0	0	0	0	0	0	0	0	0	0	0	0	0	0	0	0	0	0	0	0	0	0	0	0	0	0	0	0	0	0
tRNA	tRNA-Val-CAC-1-3	4	26725974	26726047	+	0	0	0	0	0	0	0	0	0	0	0	0	0	0	0	0	0	0	0	0	0	0	0	0	0	0	0	0	0	0
tRNA	tRNA-Ala-CGC-1-1	4	26741200	26741272	+	0	0	0	0	0	0	0	0	0	0	0	0	0	0	0	0	0	0	0	0	0	0	0	0	0	0	0	0	0	0
tRNA	tRNA-Ile-AAT-1-1	4	26741820	26741894	+	0	0	0	0	0	0	0	0	0	0	0	0	0	0	0	0	0	0	0	0	0	0	0	0	0	0	0	0	0	0
tRNA	tRNA-Pro-AGG-1-2	4	26742947	26743019	+	0	0	0	0	0	0	0	0	0	0	0	0	0	0	0	0	0	0	0	0	0	0	0	0	0	0	0	0	0	0
tRNA	tRNA-Lys-CTT-1-2	4	26744778	26744851	+	0	0	0	0	0	0	0	0	0	0	0	0	0	0	0	0	0	0	0	0	0	0	0	0	0	0	0	0	0	0
tRNA	tRNA-Tyr-GTA-1-1	4	26763440	26763531	+	0	0	0	0	0	0	0	0	0	0	0	0	0	0	0	0	0	0	0	0	0	0	0	0	0	0	0	0	0	0
tRNA	tRNA-Ala-AGC-17-1	4	26766531	26766604	-	0	0	0	0	0	0	0	0	0	0	0	0	0	0	0	0	0	0	0	0	0	0	0	0	0	0	0	0	0	0
tRNA	tRNA-Tyr-GTA-6-1	4	26770435	26770527	+	0	0	0	0	0	0	0	0	0	0	0	0	0	0	0	0	0	0	0	0	0	0	0	0	0	0	0	0	0	0
tRNA	tRNA-Tyr-GTA-4-1	4	26771907	26771997	+	0	0	0	0	0	0	0	0	0	0	0	0	0	0	0	0	0	0	0	0	0	0	0	0	0	0	0	0	0	0
tRNA	tRNA-Tyr-GTA-5-1	4	26782610	26782699	+	0	0	0	0	0	0	0	0	0	0	0	0	0	0	0	0	0	0	0	0	0	0	0	0	0	0	0	0	0	0
tRNA	tRNA-Ala-AGC-13-1	4	26858135	26858208	+	0	0	0	0	0	0	0	0	0	0	0	0	0	0	0	0	0	0	0	0	0	0	0	0	0	0	0	0	0	0
tRNA	tRNA-Ala-AGC-13-2	4	26867393	26867466	+	0	0	0	0	0	0	0	0	0	0	0	0	0	0	0	0	0	0	0	0	0	0	0	0	0	0	0	0	0	0
tRNA	tRNA-Ala-AGC-14-1	4	26875697	26875770	+	0	0	0	0	0	0	0	0	0	0	0	0	0	0	0	0	0	0	0	0	0	0	0	0	0	0	0	0	0	0
tRNA	tRNA-Ala-AGC-18-1	4	26887345	26887418	+	0	0	0	0	0	0	0	0	0	0	0	0	0	0	0	0	0	0	0	0	0	0	0	0	0	0	0	0	0	0
tRNA	tRNA-Ala-AGC-12-1	4	26954426	26954499	-	0	0	0	0	0	0	0	0	0	0	0	0	0	0	0	0	0	0	0	0	0	0	0	0	0	0	0	0	0	0
tRNA	tRNA-Met-CAT-4-1	4	26957830	26957903	-	0	0	0	0	0	0	0	0	0	0	0	0	0	0	0	0	0	0	0	0	0	0	0	0	0	0	0	0	0	0
tRNA	tRNA-Ile-TAT-2-1	4	26986789	26986883	+	0	0	0	0	0	0	0	0	0	0	0	0	0	0	0	0	0	0	0	0	0	0	0	0	0	0	0	0	0	0
tRNA	tRNA-Pro-CGG-1-2	4	27022552	27022624	+	0	0	0	0	0	0	0	0	0	0	0	0	0	0	0	0	0	0	0	0	0	0	0	0	0	0	0	0	0	0
tRNA	tRNA-Ser-GCT-1-1	4	27032078	27032160	+	0	0	0	0	0	0	0	0	0	0	0	0	0	0	0	0	0	0	0	0	0	0	0	0	0	0	0	0	0	0
tRNA	tRNA-Val-CAC-6-1	4	27079294	27079367	+	0	0	0	0	0	0	0	0	0	0	0	0	0	0	0	0	0	0	0	0	0	0	0	0	0	0	0	0	0	0
tRNA	tRNA-His-GTG-3-4	4	27086699	27086771	+	0	0	0	0	0	0	0	0	0	0	0	0	0	0	0	0	0	0	0	0	0	0	0	0	0	0	0	0	0	0
tRNA	tRNA-Thr-AGT-2-1	4	27090878	27090952	+	0	0	0	0	0	0	0	0	0	0	0	0	0	0	0	0	0	0	0	0	0	0	0	0	0	0	0	0	0	0
tRNA	tRNA-Ile-AAT-4-1	4	27101893	27101967	-	0	0	0	0	0	0	0	0	0	0	0	0	0	0	0	0	0	0	0	0	0	0	0	0	0	0	0	0	0	0
tRNA	tRNA-Val-CAC-2-1	4	27126023	27126096	-	0	0	0	0	0	0	0	0	0	0	0	0	0	0	0	0	0	0	0	0	0	0	0	0	0	0	0	0	0	0
tRNA	tRNA-Ser-CGA-4-1	4	27130637	27130719	+	0	0	0	0	0	0	0	0	0	0	0	0	0	0	0	0	0	0	0	0	0	0	0	0	0	0	0	0	0	0
tRNA	tRNA-Arg-ACG-3-1	4	27133912	27133985	-	0	0	0	0	0	0	0	0	0	0	0	0	0	0	0	0	0	0	0	0	0	0	0	0	0	0	0	0	0	0
tRNA	tRNA-Val-AAC-6-1	4	27150667	27150740	-	0	0	0	0	0	0	0	0	0	0	0	0	0	0	0	0	0	0	0	0	0	0	0	0	0	0	0	0	0	0
tRNA	tRNA-Leu-TAA-3-1	4	27155314	27155397	+	0	0	0	0	0	0	0	0	0	0	0	0	0	0	0	0	0	0	0	0	0	0	0	0	0	0	0	0	0	0
tRNA	tRNA-Ile-AAT-7-1	4	27163437	27163512	-	0	0	0	0	0	0	0	0	0	0	0	0	0	0	0	0	0	0	0	0	0	0	0	0	0	0	0	0	0	0
tRNA	tRNA-Ile-AAT-6-1	4	27195384	27195458	+	0	0	0	0	0	0	0	0	0	0	0	0	0	0	0	0	0	0	0	0	0	0	0	0	0	0	0	0	0	0
tRNA	tRNA-Ile-AAT-2-1	4	27196641	27196715	-	0	0	0	0	0	0	0	0	0	0	0	0	0	0	0	0	0	0	0	0	0	0	0	0	0	0	0	0	0	0
tRNA	tRNA-Val-CAC-8-1	4	27203034	27203107	-	0	0	0	0	0	0	0	0	0	0	0	0	0	0	0	0	0	0	0	0	0	0	0	0	0	0	0	0	0	0
tRNA	tRNA-Val-TAC-4-1	4	27213544	27213617	+	0	0	0	0	0	0	0	0	0	0	0	0	0	0	0	0	0	0	0	0	0	0	0	0	0	0	0	0	0	0
tRNA	tRNA-Ile-AAT-3-1	4	27216806	27216880	+	0	0	0	0	0	0	0	0	0	0	0	0	0	0	0	0	0	0	0	0	0	0	0	0	0	0	0	0	0	0
tRNA	tRNA-Gln-CTG-8-1	4	27218341	27218413	+	0	0	0	0	0	0	0	0	0	0	0	0	0	0	0	0	0	0	0	0	0	0	0	0	0	0	0	0	0	0
tRNA	tRNA-Ser-GCT-2-1	4	27220811	27220893	+	0	0	0	0	0	0	0	0	0	0	0	0	0	0	0	0	0	0	0	0	0	0	0	0	0	0	0	0	0	0
tRNA	tRNA-iMet-CAT-7-1	4	27227606	27227679	-	0	0	0	0	0	0	0	0	0	0	0	0	0	0	0	0	0	0	0	0	0	0	0	0	0	0	0	0	0	0
tRNA	tRNA-iMet-CAT-4-1	4	27258560	27258632	-	0	0	0	0	0	0	0	0	0	0	0	0	0	0	0	0	0	0	0	0	0	0	0	0	0	0	0	0	0	0
tRNA	tRNA-Lys-TTT-4-1	4	27260567	27260640	-	0	0	0	0	0	0	0	0	0	0	0	0	0	0	0	0	0	0	0	0	0	0	0	0	0	0	0	0	0	0
snRNA	ENSMMUG00000027759	4	27368991	27369096	+	0	0	0	0	0	0	0	0	0	0	0	0	0	0	0	0	0	0	0	0	0	0	0	0	0	0	0	0	0	0
tRNA	tRNA-Ser-AGA-2-2	4	27405144	27405226	+	0	0	0	0	0	0	0	0	0	0	0	0	0	0	0	0	0	0	0	0	0	0	0	0	0	0	0	0	0	0
tRNA	tRNA-Asp-GTC-1-2	4	27405858	27405930	+	0	0	0	0	0	0	0	0	0	0	0	0	0	0	0	0	0	0	0	0	0	0	0	0	0	0	0	0	0	0
tRNA	tRNA-Ser-AGA-2-3	4	27423956	27424038	+	0	0	0	0	0	0	0	0	0	0	0	0	0	0	0	0	0	0	0	0	0	0	0	0	0	0	0	0	0	0
tRNA	tRNA-Ser-AGA-4-1	4	27431042	27431124	+	0	0	0	0	0	0	0	0	0	0	0	0	0	0	0	0	0	0	0	0	0	0	0	0	0	0	0	0	0	0
tRNA	tRNA-Asp-GTC-1-3	4	27431726	27431798	+	0	0	0	0	0	0	0	0	0	0	0	0	0	0	0	0	0	0	0	0	0	0	0	0	0	0	0	0	0	0
tRNA	tRNA-Ser-TGA-5-1	4	27433878	27433960	-	0	0	0	0	0	0	0	0	0	0	0	0	0	0	0	0	0	0	0	0	0	0	0	0	0	0	0	0	0	0
tRNA	tRNA-Gln-CTG-1-1	4	27447898	27447970	+	0	0	0	0	0	0	0	0	0	0	0	0	0	0	0	0	0	0	0	0	0	0	0	0	0	0	0	0	0	0
tRNA	tRNA-Ser-AGA-3-1	4	27459305	27459387	+	0	0	0	0	0	0	0	0	0	0	0	0	0	0	0	0	0	0	0	0	0	0	0	0	0	0	0	0	0	0
tRNA	tRNA-Ser-AGA-1-1	4	27468718	27468800	-	0	0	0	0	0	0	0	0	0	0	0	0	0	0	0	0	0	0	0	0	0	0	0	0	0	0	0	0	0	0
tRNA	tRNA-Ser-TGA-3-1	4	27472584	27472666	+	0	0	0	0	0	0	0	0	0	0	0	0	0	0	0	0	0	0	0	0	0	0	0	0	0	0	0	0	0	0
tRNA	tRNA-Gln-CTG-9-1	4	27474582	27474654	-	0	0	0	0	0	0	0	0	0	0	0	0	0	0	0	0	0	0	0	0	0	0	0	0	0	0	0	0	0	0
tRNA	tRNA-Ser-AGA-2-4	4	27480084	27480166	-	0	0	0	0	0	0	0	0	0	0	0	0	0	0	0	0	0	0	0	0	0	0	0	0	0	0	0	0	0	0
tRNA	tRNA-Arg-TCT-4-1	4	27490539	27490626	+	0	0	0	0	0	0	0	0	0	0	0	0	0	0	0	0	0	0	0	0	0	0	0	0	0	0	0	0	0	0
tRNA	tRNA-Leu-CAA-5-1	4	27502916	27503022	-	0	0	0	0	0	0	0	0	0	0	0	0	0	0	0	0	0	0	0	0	0	0	0	0	0	0	0	0	0	0
tRNA	tRNA-Lys-TTT-4-2	4	27507716	27507789	+	0	0	0	0	0	0	0	0	0	0	0	0	0	0	0	0	0	0	0	0	0	0	0	0	0	0	0	0	0	0
tRNA	tRNA-Asp-GTC-3-1	4	27514113	27514185	-	0	0	0	0	0	0	0	0	0	0	0	0	0	0	0	0	0	0	0	0	0	0	0	0	0	0	0	0	0	0
tRNA	tRNA-Lys-TTT-5-1	4	27530544	27530617	-	0	0	0	0	0	0	0	0	0	0	0	0	0	0	0	0	0	0	0	0	0	0	0	0	0	0	0	0	0	0
tRNA	tRNA-iMet-CAT-1-4	4	27531565	27531637	-	0	0	0	0	0	0	0	0	0	0	0	0	0	0	0	0	0	0	0	0	0	0	0	0	0	0	0	0	0	0
tRNA	tRNA-Leu-CAA-1-1	4	27541293	27541400	-	0	0	0	0	0	0	0	0	0	0	0	0	0	0	0	0	0	0	0	0	0	0	0	0	0	0	0	0	0	0
tRNA	tRNA-Leu-CAA-1-2	4	27542552	27542659	-	0	0	0	0	0	0	0	0	0	0	0	0	0	0	0	0	0	0	0	0	0	0	0	0	0	0	0	0	0	0
tRNA	tRNA-Leu-CAA-4-1	4	27544610	27544718	-	0	0	0	0	0	0	0	0	0	0	0	0	0	0	0	0	0	0	0	0	0	0	0	0	0	0	0	0	0	0
tRNA	tRNA-Arg-CCT-6-1	4	27552722	27552795	+	0	0	0	0	0	0	0	0	0	0	0	0	0	0	0	0	0	0	0	0	0	0	0	0	0	0	0	0	0	0
tRNA	tRNA-Ile-TAT-2-2	4	27565997	27566091	+	0	0	0	0	0	0	0	0	0	0	0	0	0	0	0	0	0	0	0	0	0	0	0	0	0	0	0	0	0	0
tRNA	tRNA-Val-AAC-1-1	4	27586015	27586088	-	0	0	0	0	0	0	0	0	0	0	0	0	0	0	0	0	0	0	0	0	0	0	0	0	0	0	0	0	0	0
tRNA	tRNA-Ile-AAT-1-2	4	27598096	27598170	+	0	0	0	0	0	0	0	0	0	0	0	0	0	0	0	0	0	0	0	0	0	0	0	0	0	0	0	0	0	0
tRNA	tRNA-Arg-ACG-4-1	4	27600118	27600191	-	0	0	0	0	0	0	0	0	0	0	0	0	0	0	0	0	0	0	0	0	0	0	0	0	0	0	0	0	0	0
tRNA	tRNA-Ser-CGA-2-1	4	27601827	27601909	-	0	0	0	0	0	0	0	0	0	0	0	0	0	0	0	0	0	0	0	0	0	0	0	0	0	0	0	0	0	0
tRNA	tRNA-Val-AAC-3-1	4	27610098	27610171	+	0	0	0	0	0	0	0	0	0	0	0	0	0	0	0	0	0	0	0	0	0	0	0	0	0	0	0	0	0	0
tRNA	tRNA-Thr-AGT-3-2	4	27614175	27614249	-	0	0	0	0	0	0	0	0	0	0	0	0	0	0	0	0	0	0	0	0	0	0	0	0	0	0	0	0	0	0
tRNA	tRNA-Ile-AAT-1-3	4	27617419	27617493	+	0	0	0	0	0	0	0	0	0	0	0	0	0	0	0	0	0	0	0	0	0	0	0	0	0	0	0	0	0	0
tRNA	tRNA-Leu-TAA-4-1	4	27657523	27657606	-	0	0	0	0	0	0	0	0	0	0	0	0	0	0	0	0	0	0	0	0	0	0	0	0	0	0	0	0	0	0
tRNA	tRNA-Thr-AGT-6-1	4	27663397	27663471	+	0	0	0	0	0	0	0	0	0	0	0	0	0	0	0	0	0	0	0	0	0	0	0	0	0	0	0	0	0	0
tRNA	tRNA-Val-CAC-5-1	4	27665224	27665298	-	0	0	0	0	0	0	0	0	0	0	0	0	0	0	0	0	0	0	0	0	0	0	0	0	0	0	0	0	0	0
tRNA	tRNA-Val-AAC-4-2	4	27696222	27696295	-	0	0	0	0	0	0	0	0	0	0	0	0	0	0	0	0	0	0	0	0	0	0	0	0	0	0	0	0	0	0
tRNA	tRNA-iMet-CAT-3-1	4	27728194	27728266	+	0	0	0	0	0	0	0	0	0	0	0	0	0	0	0	0	0	0	0	0	0	0	0	0	0	0	0	0	0	0
tRNA	tRNA-Gln-CTG-6-1	4	27750030	27750102	-	0	0	0	0	0	0	0	0	0	0	0	0	0	0	0	0	0	0	0	0	0	0	0	0	0	0	0	0	0	0
tRNA	tRNA-Gln-TTG-3-2	4	27754550	27754622	-	0	0	0	0	0	0	0	0	0	0	0	0	0	0	0	0	0	0	0	0	0	0	0	0	0	0	0	0	0	0
tRNA	tRNA-iMet-CAT-1-5	4	27860002	27860074	-	0	0	0	0	0	0	0	0	0	0	0	0	0	0	0	0	0	0	0	0	0	0	0	0	0	0	0	0	0	0
tRNA	tRNA-Gly-GCC-2-2	4	27860423	27860494	-	0	0	0	0	0	0	0	0	0	0	0	0	0	0	0	0	0	0	0	0	0	0	0	0	0	0	0	0	0	0
tRNA	tRNA-Ser-GCT-4-1	4	28101199	28101281	+	0	0	0	0	0	0	0	0	0	0	0	0	0	0	0	0	0	0	0	0	0	0	0	0	0	0	0	0	0	0
snRNA	ENSMMUG00000033265	4	28645619	28645721	+	0	0	0	0	0	0	0	0	0	0	0	0	0	0	0	0	0	0	0	0	0	0	0	0	0	0	0	0	0	0
tRNA	tRNA-Thr-TGT-2-1	4	28898037	28898111	-	0	0	0	0	0	0	0	0	0	0	0	0	0	0	0	0	0	0	0	0	0	0	0	0	0	0	0	0	0	0
tRNA	tRNA-Leu-AAG-4-1	4	28902137	28902219	-	0	0	0	0	0	0	0	0	0	0	0	0	0	0	0	0	0	0	0	0	0	0	0	0	0	0	0	0	0	0
tRNA	tRNA-Thr-CGT-4-1	4	28917534	28917608	-	0	0	0	0	0	0	0	0	0	0	0	0	0	0	0	0	0	0	0	0	0	0	0	0	0	0	0	0	0	0
tRNA	tRNA-Ile-TAT-4-1	4	28962679	28962773	+	0	0	0	0	0	0	0	0	0	0	0	0	0	0	0	0	0	0	0	0	0	0	0	0	0	0	0	0	0	0
tRNA	tRNA-Arg-TCG-5-1	4	28968225	28968298	-	0	0	0	0	0	0	0	0	0	0	0	0	0	0	0	0	0	0	0	0	0	0	0	0	0	0	0	0	0	0
tRNA	tRNA-Gln-TTG-2-1	4	29014459	29014531	+	0	0	0	0	0	0	0	0	0	0	0	0	0	0	0	0	0	0	0	0	0	0	0	0	0	0	0	0	0	0
tRNA	tRNA-Ser-GCT-3-2	4	29022266	29022348	-	0	0	0	0	0	0	0	0	0	0	0	0	0	0	0	0	0	0	0	0	0	0	0	0	0	0	0	0	0	0
tRNA	tRNA-Ala-AGC-5-1	4	29031454	29031529	+	0	0	0	0	0	0	0	0	0	0	0	0	0	0	0	0	0	0	0	0	0	0	0	0	0	0	0	0	0	0
tRNA	tRNA-Ala-TGC-9-1	4	29052663	29052735	-	0	0	0	0	0	0	0	0	0	0	0	0	0	0	0	0	0	0	0	0	0	0	0	0	0	0	0	0	0	0
tRNA	tRNA-Ala-TGC-8-1	4	29063551	29063623	+	0	0	0	0	0	0	0	0	0	0	0	0	0	0	0	0	0	0	0	0	0	0	0	0	0	0	0	0	0	0
tRNA	tRNA-Thr-CGT-3-1	4	29072992	29073066	-	0	0	0	0	0	0	0	0	0	0	0	0	0	0	0	0	0	0	0	0	0	0	0	0	0	0	0	0	0	0
tRNA	tRNA-Ala-AGC-8-1	4	29082994	29083066	-	0	0	0	0	0	0	0	0	0	0	0	0	0	0	0	0	0	0	0	0	0	0	0	0	0	0	0	0	0	0
tRNA	tRNA-Ala-CGC-1-2	4	29098082	29098154	-	0	0	0	0	0	0	0	0	0	0	0	0	0	0	0	0	0	0	0	0	0	0	0	0	0	0	0	0	0	0
tRNA	tRNA-Ala-CGC-4-1	4	29110330	29110402	-	0	0	0	0	0	0	0	0	0	0	0	0	0	0	0	0	0	0	0	0	0	0	0	0	0	0	0	0	0	0
tRNA	tRNA-Ala-AGC-4-1	4	29126986	29127058	+	0	0	0	0	0	0	0	0	0	0	0	0	0	0	0	0	0	0	0	0	0	0	0	0	0	0	0	0	0	0
tRNA	tRNA-Ala-AGC-1-1	4	29134563	29134635	+	0	0	0	0	0	0	0	0	0	0	0	0	0	0	0	0	0	0	0	0	0	0	0	0	0	0	0	0	0	0
tRNA	tRNA-Thr-AGT-5-1	4	29141351	29141425	+	0	0	0	0	0	0	0	0	0	0	0	0	0	0	0	0	0	0	0	0	0	0	0	0	0	0	0	0	0	0
tRNA	tRNA-Phe-GAA-5-1	4	29142389	29142462	-	0	0	0	0	0	0	0	0	0	0	0	0	0	0	0	0	0	0	0	0	0	0	0	0	0	0	0	0	0	0
tRNA	tRNA-Ala-TGC-11-1	4	29144757	29144829	+	0	0	0	0	0	0	0	0	0	0	0	0	0	0	0	0	0	0	0	0	0	0	0	0	0	0	0	0	0	0
tRNA	tRNA-Ala-CGC-2-1	4	29146601	29146673	+	0	0	0	0	0	0	0	0	0	0	0	0	0	0	0	0	0	0	0	0	0	0	0	0	0	0	0	0	0	0
tRNA	tRNA-Ala-AGC-2-1	4	29152122	29152194	-	0	0	0	0	0	0	0	0	0	0	0	0	0	0	0	0	0	0	0	0	0	0	0	0	0	0	0	0	0	0
tRNA	tRNA-Arg-CCG-1-1	4	29158845	29158918	-	0	0	0	0	0	0	0	0	0	0	0	0	0	0	0	0	0	0	0	0	0	0	0	0	0	0	0	0	0	0
tRNA	tRNA-Lys-TTT-7-1	4	29163625	29163698	+	0	0	0	0	0	0	0	0	0	0	0	0	0	0	0	0	0	0	0	0	0	0	0	0	0	0	0	0	0	0
tRNA	tRNA-Ala-TGC-2-1	4	29174352	29174424	-	0	0	0	0	0	0	0	0	0	0	0	0	0	0	0	0	0	0	0	0	0	0	0	0	0	0	0	0	0	0
tRNA	tRNA-Val-GAC-2-1	4	29180307	29180383	-	0	0	0	0	0	0	0	0	0	0	0	0	0	0	0	0	0	0	0	0	0	0	0	0	0	0	0	0	0	0
tRNA	tRNA-Phe-GAA-3-1	4	29181407	29181480	+	0	0	0	0	0	0	0	0	0	0	0	0	0	0	0	0	0	0	0	0	0	0	0	0	0	0	0	0	0	0
tRNA	tRNA-Ala-AGC-19-1	4	29185024	29185096	-	0	0	0	0	0	0	0	0	0	0	0	0	0	0	0	0	0	0	0	0	0	0	0	0	0	0	0	0	0	0
tRNA	tRNA-Ala-TGC-5-1	4	29196429	29196501	-	0	0	0	0	0	0	0	0	0	0	0	0	0	0	0	0	0	0	0	0	0	0	0	0	0	0	0	0	0	0
tRNA	tRNA-Phe-GAA-2-1	4	29197371	29197444	-	0	0	0	0	0	0	0	0	0	0	0	0	0	0	0	0	0	0	0	0	0	0	0	0	0	0	0	0	0	0
tRNA	tRNA-Ala-AGC-7-1	4	29210476	29210548	-	0	0	0	0	0	0	0	0	0	0	0	0	0	0	0	0	0	0	0	0	0	0	0	0	0	0	0	0	0	0
tRNA	tRNA-Ala-TGC-10-1	4	29216698	29216770	-	0	0	0	0	0	0	0	0	0	0	0	0	0	0	0	0	0	0	0	0	0	0	0	0	0	0	0	0	0	0
tRNA	tRNA-Val-GAC-1-1	4	29221524	29221597	-	0	0	0	0	0	0	0	0	0	0	0	0	0	0	0	0	0	0	0	0	0	0	0	0	0	0	0	0	0	0
tRNA	tRNA-Ala-AGC-6-1	4	29226020	29226092	-	0	0	0	0	0	0	0	0	0	0	0	0	0	0	0	0	0	0	0	0	0	0	0	0	0	0	0	0	0	0
tRNA	tRNA-Ala-TGC-4-1	4	29231473	29231545	-	0	0	0	0	0	0	0	0	0	0	0	0	0	0	0	0	0	0	0	0	0	0	0	0	0	0	0	0	0	0
tRNA	tRNA-Ser-GGA-1-1	4	29237198	29237271	-	0	0	0	0	0	0	0	0	0	0	0	0	0	0	0	0	0	0	0	0	0	0	0	0	0	0	0	0	0	0
tRNA	tRNA-Asp-ATC-1-1	4	29241213	29241285	-	0	0	0	0	0	0	0	0	0	0	0	0	0	0	0	0	0	0	0	0	0	0	0	0	0	0	0	0	0	0
tRNA	tRNA-Ala-AGC-3-1	4	29252413	29252485	-	0	0	0	0	0	0	0	0	0	0	0	0	0	0	0	0	0	0	0	0	0	0	0	0	0	0	0	0	0	0
tRNA	tRNA-Ala-AGC-3-2	4	29276351	29276423	-	0	0	0	0	0	0	0	0	0	0	0	0	0	0	0	0	0	0	0	0	0	0	0	0	0	0	0	0	0	0
tRNA	tRNA-Arg-CCG-1-2	4	29290433	29290506	+	0	0	0	0	0	0	0	0	0	0	0	0	0	0	0	0	0	0	0	0	0	0	0	0	0	0	0	0	0	0
tRNA	tRNA-Leu-CAA-2-1	4	29310171	29310276	-	0	0	0	0	0	0	0	0	0	0	0	0	0	0	0	0	0	0	0	0	0	0	0	0	0	0	0	0	0	0
snoRNA	ENSMMUG00000033322	4	29316325	29316411	+	0	0	0	0	0	0	0	0	0	0	0	0	0	0	0	0	0	0	0	0	0	0	0	0	0	0	0	0	0	0
tRNA	tRNA-Leu-CAA-2-2	4	29363676	29363781	+	0	0	0	0	0	0	0	0	0	0	0	0	0	0	0	0	0	0	0	0	0	0	0	0	0	0	0	0	0	0
tRNA	tRNA-Gln-CTG-1-2	4	29364218	29364290	-	0	0	0	0	0	0	0	0	0	0	0	0	0	0	0	0	0	0	0	0	0	0	0	0	0	0	0	0	0	0
tRNA	tRNA-Leu-AAG-3-1	4	29366567	29366649	-	0	0	0	0	0	0	0	0	0	0	0	0	0	0	0	0	0	0	0	0	0	0	0	0	0	0	0	0	0	0
tRNA	tRNA-Met-CAT-5-1	4	29367520	29367593	+	0	0	0	0	0	0	0	0	0	0	0	0	0	0	0	0	0	0	0	0	0	0	0	0	0	0	0	0	0	0
tRNA	tRNA-Lys-TTT-1-4	4	29373123	29373196	+	0	0	0	0	0	0	0	0	0	0	0	0	0	0	0	0	0	0	0	0	0	0	0	0	0	0	0	0	0	0
tRNA	tRNA-Met-CAT-2-1	4	29375059	29375132	-	0	0	0	0	0	0	0	0	0	0	0	0	0	0	0	0	0	0	0	0	0	0	0	0	0	0	0	0	0	0
tRNA	tRNA-Phe-GAA-1-1	4	29392131	29392204	-	0	0	0	0	0	0	0	0	0	0	0	0	0	0	0	0	0	0	0	0	0	0	0	0	0	0	0	0	0	0
tRNA	tRNA-Glu-CTC-1-3	4	29392657	29392729	+	0	0	0	0	0	0	0	0	0	0	0	0	0	0	0	0	0	0	0	0	0	0	0	0	0	0	0	0	0	0
tRNA	tRNA-Leu-TAG-2-1	4	29399227	29399309	+	0	0	0	0	0	0	0	0	0	0	0	0	0	0	0	0	0	0	0	0	0	0	0	0	0	0	0	0	0	0
snoRNA	ENSMMUG00000037061	4	29713602	29713761	-	0	0	0	0	0	0	0	0	0	0	0	0	0	0	0	0	0	0	0	0	0	0	0	0	0	0	0	0	0	0
snRNA	ENSMMUG00000036054	4	30652935	30653034	+	0	0	0	0	0	0	0	0	0	0	0	0	0	0	0	0	0	0	0	0	0	0	0	0	0	0	0	0	0	0
snoRNA	ENSMMUG00000024536	4	31170747	31170822	-	0	1	1	0	0	0	0	0	0	1	1	1	0	0	0	0	1	0	0	1	1	0	1	0	0	0	0	0	0	0
snoRNA	ENSMMUG00000026474	4	31175606	31175683	-	163	407	482	130	118	265	363	290	230	390	322	341	196	227	99	237	314	154	342	165	794	91	254	123	220	325	190	219	311	233
snoRNA	ENSMMUG00000025918	4	31264642	31264773	+	0	0	0	0	0	0	0	0	0	0	0	0	0	0	0	0	0	0	0	0	0	0	0	0	0	0	0	0	0	0
snoRNA	ENSMMUG00000024923	4	31484128	31484190	+	3	2	4	1	1	3	4	1	4	2	2	3	2	2	1	2	3	1	3	1	3	0	2	1	3	3	3	2	2	2
snoRNA	ENSMMUG00000024056	4	31485638	31485704	+	8	18	19	11	20	10	31	6	32	14	7	44	6	7	3	10	14	5	22	13	42	3	21	12	7	9	9	12	18	10
snRNA	ENSMMUG00000024287	4	31874309	31874448	+	0	0	0	0	0	0	0	0	0	0	0	0	0	0	0	0	0	0	0	0	0	0	0	0	0	0	0	0	0	0
snRNA	ENSMMUG00000035836	4	31988873	31988972	+	0	0	0	0	0	0	0	0	0	0	0	0	0	0	0	0	0	0	0	0	0	0	0	0	0	0	0	0	0	0
snRNA	ENSMMUG00000036513	4	32173547	32173694	-	0	0	0	0	0	0	0	0	0	0	0	0	0	0	0	0	0	0	0	0	0	0	0	0	0	0	0	0	0	0
snRNA	ENSMMUG00000026693	4	32215976	32216124	-	0	0	0	0	0	0	0	0	0	0	0	0	0	0	0	0	0	0	0	0	0	0	0	0	0	0	0	0	0	0
snRNA	ENSMMUG00000024828	4	32238287	32238434	-	0	0	0	0	0	0	0	0	0	0	0	0	0	0	0	0	0	0	0	0	0	0	0	0	0	0	0	0	0	0
snRNA	ENSMMUG00000037057	4	32273493	32273639	-	0	0	0	0	0	0	0	0	0	0	0	0	0	0	0	0	0	0	0	0	0	0	0	0	0	0	0	0	0	0
snoRNA	ENSMMUG00000037255	4	34417705	34417811	+	0	0	0	0	0	0	0	0	0	0	0	0	0	0	0	0	0	0	0	0	0	0	0	0	0	0	0	0	0	0
snoRNA	ENSMMUG00000025267	4	35072801	35072935	-	0	0	0	0	0	0	0	0	0	0	0	0	0	0	0	0	0	0	0	0	0	0	0	0	0	0	0	0	0	0
snoRNA	ENSMMUG00000033122	4	35383756	35383872	+	0	0	0	0	0	0	0	0	0	0	0	0	0	0	0	0	0	0	0	0	0	0	0	0	0	0	0	0	0	0
snRNA	ENSMMUG00000024986	4	36398020	36398152	-	0	0	0	0	0	0	0	0	0	0	0	0	0	0	0	0	0	0	0	0	0	0	0	0	0	0	0	0	0	0
snoRNA	ENSMMUG00000035502	4	37022931	37023034	-	0	0	0	0	0	0	0	0	0	0	0	0	0	0	0	0	0	0	0	0	0	0	0	0	0	0	0	0	0	0
snRNA	ENSMMUG00000025555	4	37719842	37720009	+	0	0	0	0	0	0	0	0	0	0	0	0	0	0	0	0	0	0	0	0	0	0	0	0	0	0	0	0	0	0
snoRNA	ENSMMUG00000026641	4	38017532	38017603	+	0	0	0	0	0	0	0	0	0	0	0	1	0	0	0	0	0	0	0	0	1	0	0	0	0	0	0	0	0	0
snoRNA	ENSMMUG00000037163	4	38645693	38645789	-	0	0	0	0	0	0	0	0	0	0	0	0	0	0	0	0	0	0	0	0	0	0	0	0	0	0	0	0	0	0
snRNA	ENSMMUG00000036893	4	40232932	40233034	+	0	0	0	0	0	0	0	0	0	0	0	0	0	0	0	0	0	0	0	0	0	0	0	0	0	0	0	0	0	0
snRNA	ENSMMUG00000035066	4	41137117	41137223	-	0	0	0	0	0	0	0	0	0	0	0	0	0	0	0	0	0	0	0	0	0	0	0	0	0	0	0	0	0	0
snRNA	ENSMMUG00000034996	4	41870846	41870949	-	0	0	0	0	0	0	0	0	0	0	0	0	0	0	0	0	0	0	0	0	0	0	0	0	0	0	0	0	0	0
snoRNA	ENSMMUG00000036604	4	42283641	42283791	-	0	0	0	0	0	0	0	0	0	0	0	0	0	0	0	0	0	0	0	0	0	0	0	0	0	0	0	0	0	0
snoRNA	ENSMMUG00000036315	4	42377615	42377725	-	0	0	0	0	0	0	0	0	0	0	0	0	0	0	0	0	0	0	0	0	0	0	0	0	0	0	0	0	0	0
snRNA	ENSMMUG00000026404	4	42540065	42540171	+	0	0	0	0	0	0	0	0	0	0	0	0	0	0	0	0	0	0	0	0	0	0	0	0	0	0	0	0	0	0
snRNA	ENSMMUG00000025011	4	43374178	43374284	+	0	0	0	0	0	0	0	0	0	0	0	0	0	0	0	0	0	0	0	0	0	0	0	0	0	0	0	0	0	0
snRNA	ENSMMUG00000036078	4	43442824	43442885	-	0	0	0	0	0	0	0	0	0	0	0	0	0	0	0	0	0	0	0	0	0	0	0	0	0	0	0	0	0	0
snoRNA	ENSMMUG00000036951	4	43445308	43445434	+	0	0	0	0	0	0	0	0	0	0	0	0	0	0	0	0	0	0	0	0	0	0	0	0	0	0	0	0	0	0
snRNA	ENSMMUG00000027788	4	45533667	45533773	+	0	0	0	0	0	0	0	0	0	0	0	0	0	0	0	0	0	0	0	0	0	0	0	0	0	0	0	0	0	0
snRNA	ENSMMUG00000032707	4	45893482	45893588	+	0	0	0	0	0	0	0	0	0	0	0	0	0	0	0	0	0	0	0	0	0	0	0	0	0	0	0	0	0	0
snRNA	ENSMMUG00000024250	4	47628548	47628711	+	0	0	0	0	0	0	0	0	0	0	0	0	0	0	0	0	0	0	0	0	0	0	0	0	0	0	0	0	0	0
snRNA	ENSMMUG00000035926	4	49098933	49098994	-	0	0	0	0	0	0	0	0	0	0	0	0	0	0	0	0	0	0	0	0	0	0	0	0	0	0	0	0	0	0
snoRNA	ENSMMUG00000032978	4	51142186	51142261	+	0	0	0	0	0	0	0	0	0	0	0	0	0	0	0	0	0	0	0	0	0	0	0	0	0	0	0	0	0	0
snRNA	ENSMMUG00000036716	4	52755646	52755745	-	0	0	0	0	0	0	0	0	0	0	0	0	0	0	0	0	0	0	0	0	0	0	0	0	0	0	0	0	0	0
snRNA	ENSMMUG00000028145	4	52821262	52821425	+	0	0	0	0	0	0	0	0	0	0	0	0	0	0	0	0	0	0	0	0	0	0	0	0	0	0	0	0	1	0
snRNA	ENSMMUG00000026090	4	56573787	56573898	+	0	0	0	0	0	0	0	0	0	0	0	0	0	0	0	0	0	0	0	0	0	0	0	0	0	0	0	0	0	0
snRNA	ENSMMUG00000036228	4	63136964	63137025	-	0	0	0	0	0	0	0	0	0	0	0	0	0	0	0	0	0	0	0	0	0	0	0	0	0	0	0	0	0	0
snoRNA	ENSMMUG00000033145	4	63626788	63626860	-	0	0	0	0	0	0	0	0	0	0	0	0	0	0	0	0	0	0	0	0	0	0	0	0	0	0	0	0	0	0
snRNA	ENSMMUG00000028398	4	63958803	63958906	+	0	0	0	0	0	0	0	0	0	0	0	0	0	0	0	0	0	0	0	0	0	0	0	0	0	0	0	0	0	0
snRNA	ENSMMUG00000037366	4	66856531	66856585	+	0	0	0	0	0	0	0	0	0	0	0	0	0	0	0	0	0	0	0	0	0	0	0	0	0	0	0	0	0	0
snoRNA	ENSMMUG00000033121	4	67439121	67439332	-	0	0	0	0	0	0	0	0	0	0	0	0	0	0	0	0	0	0	0	0	0	0	0	0	0	0	0	0	0	0
snRNA	ENSMMUG00000027754	4	67488535	67488641	+	0	0	0	0	0	0	0	0	0	0	0	0	0	0	0	0	0	0	0	0	0	0	0	0	0	0	0	0	0	0
snRNA	ENSMMUG00000034491	4	67953456	67953593	-	0	0	0	0	0	0	0	0	0	0	0	0	0	0	0	0	0	0	0	0	0	0	0	0	0	0	0	0	0	0
snoRNA	ENSMMUG00000037130	4	69631863	69631963	-	0	0	0	0	0	0	0	0	0	0	0	0	0	0	0	0	0	0	0	0	0	0	0	0	0	0	0	0	0	0
snoRNA	ENSMMUG00000033704	4	71544289	71544496	-	0	0	0	0	0	0	0	0	0	0	0	0	0	0	0	0	0	0	0	0	0	0	0	0	0	0	0	0	0	0
snRNA	ENSMMUG00000026241	4	71616299	71616459	-	0	0	0	0	0	0	0	0	0	0	0	0	0	0	0	0	0	0	0	0	0	0	0	0	0	0	0	0	0	0
snRNA	ENSMMUG00000036622	4	71739657	71739745	+	0	0	0	0	0	0	0	0	0	0	0	0	0	0	0	0	0	0	0	0	0	0	0	0	0	0	0	0	0	0
snRNA	ENSMMUG00000036161	4	71792259	71792352	+	0	0	0	0	0	0	0	0	0	0	0	0	0	0	0	0	0	0	0	0	0	0	0	0	0	0	0	0	0	0
snRNA	ENSMMUG00000035894	4	71906423	71906522	-	0	0	0	0	0	0	0	0	0	0	0	0	0	0	0	0	0	0	0	0	0	0	0	0	0	0	0	0	0	0
snoRNA	ENSMMUG00000035807	4	72006711	72006813	+	0	0	0	0	0	0	0	0	0	0	0	0	0	0	0	0	0	0	0	0	0	0	0	0	0	0	0	0	0	0
snRNA	ENSMMUG00000027988	4	72220354	72220460	+	0	0	0	0	0	0	0	0	0	0	0	0	0	0	0	0	0	0	0	0	0	0	0	0	0	0	0	0	0	0
snRNA	ENSMMUG00000035464	4	72586206	72586307	-	0	0	0	0	0	0	0	0	0	0	0	0	0	0	0	0	0	0	0	0	0	0	0	0	0	0	0	0	0	0
snoRNA	ENSMMUG00000036890	4	74002126	74002196	+	0	0	0	0	0	0	0	0	0	0	0	0	0	0	0	0	0	0	0	0	0	0	0	0	0	0	0	0	0	0
tRNA	tRNA-Phe-GAA-4-1	4	76977453	76977526	-	0	0	0	0	0	0	0	0	0	0	0	0	0	0	0	0	0	0	0	0	0	0	0	0	0	0	0	0	0	0
snoRNA	ENSMMUG00000024570	4	77800416	77800548	+	0	0	0	0	0	0	0	0	0	0	0	0	0	0	0	0	0	0	0	0	0	0	0	0	0	0	0	0	0	0
snRNA	ENSMMUG00000036049	4	78255953	78256055	-	0	0	0	0	0	0	0	0	0	0	0	0	0	0	0	0	0	0	0	0	0	0	0	0	0	0	0	0	0	0
snRNA	ENSMMUG00000027571	4	80760932	80761038	+	0	0	0	0	0	0	0	0	0	0	0	0	0	0	0	0	0	0	0	0	0	0	0	0	0	0	0	0	0	0
snoRNA	ENSMMUG00000024283	4	81723341	81723413	-	7	10	13	5	6	10	9	7	12	14	10	15	6	8	6	11	13	9	14	8	24	2	15	7	11	15	10	10	12	14
snoRNA	ENSMMUG00000027786	4	81723675	81723744	-	1	1	2	1	0	1	1	1	2	3	2	3	1	1	1	2	2	1	4	1	9	0	3	1	2	2	2	2	3	2
snoRNA	ENSMMUG00000036470	4	83638148	83638251	+	0	0	0	0	0	0	0	0	0	0	0	0	0	0	0	0	0	0	0	0	0	0	0	0	0	0	0	0	0	0
tRNA	tRNA-Lys-TTT-6-1	4	84138803	84138876	+	0	0	0	0	0	0	0	0	0	0	0	0	0	0	0	0	0	0	0	0	0	0	0	0	0	0	0	0	0	0
snoRNA	ENSMMUG00000035398	4	84582876	84583061	-	0	0	0	0	0	0	0	0	0	0	0	0	0	0	0	0	0	0	0	0	0	0	0	0	0	0	0	0	0	0
snRNA	ENSMMUG00000034941	4	84914030	84914220	-	3	1	1	0	0	3	1	1	0	1	0	1	0	0	0	1	1	2	1	0	1	0	0	0	2	1	1	1	4	1
snoRNA	ENSMMUG00000035518	4	85703475	85703576	+	0	0	0	0	0	0	0	0	0	0	0	0	0	0	0	0	0	0	0	0	0	0	0	0	0	0	0	0	0	0
snoRNA	ENSMMUG00000033131	4	88013008	88013105	+	0	0	0	0	0	0	0	0	0	0	0	0	0	0	0	0	0	0	0	0	0	0	0	0	0	0	0	0	0	0
snoRNA	ENSMMUG00000033676	4	88712272	88712479	+	0	0	0	0	0	0	0	0	0	0	0	0	0	0	0	0	0	0	0	0	0	0	0	0	0	0	0	0	0	0
snoRNA	ENSMMUG00000037298	4	89789971	89790094	+	0	0	0	0	0	0	0	0	0	0	0	0	0	0	0	0	0	0	0	0	0	0	0	0	0	0	0	0	0	0
snoRNA	ENSMMUG00000036075	4	91082359	91082429	-	0	0	0	0	0	0	0	0	0	0	0	0	0	0	0	0	0	0	0	0	0	0	0	0	0	0	0	0	0	0
snRNA	ENSMMUG00000027945	4	92575816	92575954	-	0	0	0	0	0	0	0	0	0	0	0	0	0	0	0	0	0	0	0	0	0	0	0	0	0	0	0	0	0	0
snoRNA	ENSMMUG00000035841	4	96885501	96885604	+	0	0	0	0	0	0	0	0	0	0	0	0	0	0	0	0	0	0	0	0	0	0	0	0	0	0	0	0	0	0
snoRNA	ENSMMUG00000036567	4	99606597	99606676	-	0	0	0	0	0	0	0	0	0	0	0	0	0	0	0	0	0	0	0	0	0	0	0	0	0	0	0	0	0	0
snoRNA	ENSMMUG00000025116	4	99610160	99610288	+	0	0	0	0	0	0	0	0	0	0	0	0	0	0	0	0	0	0	0	0	0	0	0	0	0	0	0	0	0	0
snRNA	ENSMMUG00000036106	4	100786918	100787023	+	0	0	0	0	0	0	0	0	0	0	0	0	0	0	0	0	0	0	0	0	0	0	0	0	0	0	0	0	0	0
snRNA	ENSMMUG00000032837	4	101064404	101064510	-	0	0	0	0	0	0	0	0	0	0	0	0	0	0	0	0	0	0	0	0	0	0	0	0	0	0	0	0	0	0
snoRNA	ENSMMUG00000036127	4	101908388	101908459	-	0	0	0	0	0	0	0	0	0	0	0	0	0	0	0	0	0	0	0	0	0	0	0	0	0	0	0	0	0	0
snRNA	ENSMMUG00000037150	4	102349183	102349294	+	0	0	0	0	0	0	0	0	0	0	0	0	0	0	0	0	0	0	0	0	0	0	0	0	0	0	0	0	0	0
snRNA	ENSMMUG00000033210	4	102655017	102655120	+	0	0	0	0	0	0	0	0	0	0	0	0	0	0	0	0	0	0	0	0	0	0	0	0	0	0	0	0	0	0
snRNA	ENSMMUG00000028439	4	102762965	102763071	+	0	0	0	0	0	0	0	0	0	0	0	0	0	0	0	0	0	0	0	0	0	0	0	0	0	0	0	0	1	0
snRNA	ENSMMUG00000035611	4	102783119	102783223	-	0	0	0	0	0	0	0	0	0	0	0	0	0	0	0	0	0	0	0	0	0	0	0	0	0	0	0	0	0	0
snoRNA	ENSMMUG00000035961	4	102910740	102910847	-	0	0	0	0	0	0	0	0	0	0	0	0	0	0	0	0	0	0	0	0	0	0	0	0	0	0	0	0	0	0
snRNA	ENSMMUG00000034645	4	103150872	103150976	+	0	0	0	0	0	0	0	0	0	0	0	0	0	0	0	0	0	0	0	0	0	0	0	0	0	0	0	0	0	0
snRNA	ENSMMUG00000034460	4	103998757	103998862	+	0	0	0	0	0	0	0	0	0	0	0	0	0	0	0	0	0	0	0	0	0	0	0	0	0	0	0	0	0	0
snoRNA	ENSMMUG00000036822	4	105639714	105639805	+	0	0	0	0	0	0	0	0	0	0	0	0	0	0	0	0	0	0	0	0	0	0	0	0	0	0	0	0	0	0
snoRNA	ENSMMUG00000032924	4	106599229	106599303	-	0	0	0	0	0	0	0	0	0	0	0	0	0	0	0	0	0	0	0	0	0	0	0	0	0	0	0	0	0	0
snRNA	ENSMMUG00000036700	4	107299569	107299632	+	0	0	0	0	0	0	0	0	0	0	0	0	0	0	0	0	0	0	0	0	0	0	0	0	0	0	0	0	0	0
snRNA	ENSMMUG00000033126	4	108146622	108146721	+	0	0	0	0	0	0	0	0	0	0	0	0	0	0	0	0	0	0	0	0	0	0	0	0	0	0	0	0	0	0
snRNA	ENSMMUG00000036915	4	109310314	109310383	-	0	0	0	0	0	0	0	0	0	0	0	0	0	0	0	0	0	0	0	0	0	0	0	0	0	0	0	0	0	0
snRNA	ENSMMUG00000025949	4	111453409	111453515	+	0	0	0	0	0	0	0	0	0	0	0	0	0	0	0	0	0	0	0	0	0	0	0	0	0	0	0	0	0	0
snoRNA	ENSMMUG00000035856	4	111743618	111743702	+	0	0	0	0	0	0	0	0	0	0	0	0	0	0	0	0	0	0	0	0	0	0	0	0	0	0	0	0	0	0
snRNA	ENSMMUG00000036727	4	111814063	111814166	+	0	0	0	0	0	0	0	0	0	0	0	0	0	0	0	0	0	0	0	0	0	0	0	0	0	0	0	0	0	0
snRNA	ENSMMUG00000032838	4	112170764	112170870	-	0	0	0	0	0	0	0	0	0	0	0	0	0	0	0	0	0	0	0	0	0	0	0	0	0	0	0	0	0	0
snRNA	ENSMMUG00000028498	4	112786854	112786994	+	0	0	0	0	0	0	0	0	0	0	0	0	0	0	0	0	0	0	0	0	0	0	0	0	0	0	0	0	0	0
snoRNA	ENSMMUG00000037412	4	112948839	112948942	-	0	0	0	0	0	0	0	0	0	0	0	0	0	0	0	0	0	0	0	0	0	0	0	0	0	0	0	0	0	0
snoRNA	ENSMMUG00000026139	4	113693670	113693804	-	0	0	0	0	0	0	0	0	0	0	0	0	0	0	0	0	0	0	0	0	0	0	0	0	0	0	0	0	0	0
snRNA	ENSMMUG00000036305	4	113777150	113777211	-	0	0	0	0	0	0	0	0	0	0	0	0	0	0	0	0	0	0	0	0	0	0	0	0	0	0	0	0	0	0
snRNA	ENSMMUG00000036764	4	115039336	115039397	-	0	0	0	0	0	0	0	0	0	0	0	0	0	0	0	0	0	0	0	0	0	0	0	0	0	0	0	0	0	0
snRNA	ENSMMUG00000036676	4	116738915	116738984	-	0	0	0	0	0	0	0	0	0	0	0	0	0	0	0	0	0	0	0	0	0	0	0	0	0	0	0	0	0	0
snRNA	ENSMMUG00000027408	4	118128709	118128872	+	0	0	0	0	0	0	0	0	0	0	0	0	0	0	0	0	0	0	0	0	0	0	0	0	0	0	0	0	0	0
tRNA	tRNA-Gln-TTG-8-1	4	120700995	120701067	-	0	0	0	0	0	0	0	0	0	0	0	0	0	0	0	0	0	0	0	0	0	0	0	0	0	0	0	0	0	0
tRNA	tRNA-Leu-TAA-1-1	4	121683058	121683141	-	0	0	0	0	0	0	0	0	0	0	0	0	0	0	0	0	0	0	0	0	0	0	0	0	0	0	0	0	0	0
snRNA	ENSMMUG00000028114	4	124984612	124984718	+	0	0	0	0	0	0	0	0	0	0	0	0	0	0	0	0	0	0	0	0	0	0	0	0	0	0	0	0	0	0
snRNA	ENSMMUG00000034809	4	125844675	125844792	+	0	0	0	0	0	0	0	0	0	0	0	0	0	0	0	0	0	0	0	0	0	0	0	0	0	0	0	0	0	0
snoRNA	ENSMMUG00000033071	4	126973104	126973237	+	0	0	0	0	0	0	0	0	0	0	0	0	0	0	0	0	0	0	0	0	0	0	0	0	0	0	0	0	0	0
snoRNA	ENSMMUG00000036623	4	129648761	129648864	+	0	0	0	0	0	0	0	0	0	0	0	0	0	0	0	0	0	0	0	0	0	0	0	0	0	0	0	0	0	0
snoRNA	ENSMMUG00000024847	4	131076520	131076649	-	0	0	0	1	0	0	0	0	0	0	0	0	0	0	0	1	0	1	0	1	1	0	0	0	1	1	1	0	1	1
snoRNA	ENSMMUG00000033610	4	131076989	131077064	-	102	163	194	69	78	137	175	96	138	235	178	191	110	103	47	98	145	88	179	109	372	33	133	103	139	155	151	117	152	165
snoRNA	ENSMMUG00000024902	4	131078442	131078514	-	6	11	8	7	9	8	11	7	16	6	5	12	7	7	3	8	8	4	11	10	21	5	18	8	7	8	7	11	12	6
snRNA	ENSMMUG00000034424	4	132226775	132226916	+	0	0	0	0	0	0	0	0	0	0	0	0	0	0	0	0	0	0	0	0	0	0	0	0	0	0	0	0	0	0
snRNA	ENSMMUG00000036405	4	134463449	134463554	+	0	0	0	0	0	0	0	0	0	0	0	0	0	0	0	0	0	0	0	0	0	0	0	0	0	0	0	0	0	0
snoRNA	ENSMMUG00000036403	4	135268536	135268640	-	0	0	0	0	0	0	0	0	0	0	0	0	0	0	0	0	0	0	0	0	0	0	0	0	0	0	0	0	0	0
snRNA	ENSMMUG00000036358	4	137322308	137322411	+	0	0	0	0	0	0	0	0	0	0	0	0	0	0	0	0	0	0	0	0	0	0	0	0	0	0	0	0	0	0
tRNA	tRNA-Glu-CTC-2-1	4	140404573	140404645	+	0	0	0	0	0	0	0	0	0	0	0	0	0	0	0	0	0	0	0	0	0	0	0	0	0	0	0	0	0	0
snRNA	ENSMMUG00000024438	4	141738865	141739029	-	0	0	0	0	0	0	0	0	0	0	0	0	0	0	0	0	0	0	0	0	0	0	0	0	0	0	0	0	0	0
snRNA	ENSMMUG00000034121	4	142409674	142409863	+	0	0	0	0	0	0	0	0	0	0	0	0	0	0	0	0	0	0	0	0	0	0	0	0	0	0	0	0	0	0
snRNA	ENSMMUG00000028252	4	142446357	142446495	+	0	0	0	0	0	0	0	0	0	0	0	0	0	0	0	0	0	0	0	0	0	0	0	0	0	0	0	0	0	0
snRNA	ENSMMUG00000024966	4	142532720	142532860	+	0	0	0	0	0	0	0	0	0	0	0	0	0	0	0	0	0	0	0	0	0	0	0	0	0	0	0	0	0	0
snRNA	ENSMMUG00000027779	4	142640568	142640674	-	0	0	0	0	0	0	0	0	0	0	0	0	0	0	0	0	0	0	0	0	0	0	0	0	0	0	0	0	0	0
snRNA	ENSMMUG00000027553	4	143435158	143435264	+	0	0	0	0	0	0	0	0	0	0	0	0	0	0	0	0	0	0	0	0	0	0	0	0	0	0	0	0	0	0
snRNA	ENSMMUG00000026225	4	144643335	144643439	-	0	0	0	0	0	0	0	0	0	0	0	0	0	0	0	0	0	0	0	0	0	0	0	0	0	0	0	0	0	0
snRNA	ENSMMUG00000028530	4	146530942	146531050	+	0	0	0	0	0	0	0	0	0	0	0	0	0	0	0	0	0	0	0	0	0	0	0	0	0	0	0	0	0	0
snRNA	ENSMMUG00000037161	4	149067726	149067829	+	0	0	0	0	0	0	0	0	0	0	0	0	0	0	0	0	0	0	0	0	0	0	0	0	0	0	0	0	0	0
snoRNA	ENSMMUG00000037364	4	150085590	150085678	-	0	0	0	0	0	0	0	0	0	0	0	0	0	0	0	0	0	0	0	0	0	0	0	0	0	0	0	0	0	0
snoRNA	ENSMMUG00000034919	4	150148579	150148731	+	0	0	0	0	0	0	0	0	0	0	0	0	0	0	0	0	0	0	0	0	0	0	0	0	0	0	0	0	0	0
snRNA	ENSMMUG00000037194	4	150979188	150979291	-	0	0	0	0	0	0	0	0	0	0	0	0	0	0	0	0	0	0	0	0	0	0	0	0	0	0	0	0	0	0
snoRNA	ENSMMUG00000036212	4	151456366	151456467	-	0	0	0	0	0	0	0	0	0	0	0	0	0	0	0	0	0	0	0	0	0	0	0	0	0	0	0	0	0	0
snRNA	ENSMMUG00000027497	4	151744371	151744477	+	0	0	0	0	0	0	0	0	0	0	0	0	0	0	0	0	0	0	0	0	0	0	0	0	0	0	0	0	0	0
snRNA	ENSMMUG00000025303	4	151860688	151860794	-	0	0	0	0	0	0	0	0	0	0	0	0	0	0	0	0	0	0	0	0	0	0	0	0	0	0	0	0	0	0
snoRNA	ENSMMUG00000036605	4	152290695	152290795	+	0	0	0	0	0	0	0	0	0	0	0	0	0	0	0	0	0	0	0	0	0	0	0	0	0	0	0	0	0	0
snRNA	ENSMMUG00000024906	4	152838628	152838734	+	0	0	0	0	0	0	0	0	0	0	0	0	0	0	0	0	0	0	0	0	0	0	0	0	0	0	0	0	0	0
snRNA	ENSMMUG00000032869	4	152917643	152917746	+	0	0	0	0	0	0	0	0	0	0	0	0	0	0	0	0	0	0	0	0	0	0	0	0	0	0	0	0	0	0
snoRNA	ENSMMUG00000036070	4	152963430	152963533	-	0	0	0	0	0	0	0	0	0	0	0	0	0	0	0	0	0	0	0	0	0	0	0	0	0	0	0	0	0	0
snRNA	ENSMMUG00000027682	4	153081662	153081768	-	0	0	0	0	0	0	0	0	0	0	0	0	0	0	0	0	0	0	0	0	0	0	0	0	0	0	0	0	0	0
snoRNA	ENSMMUG00000032995	4	153098162	153098289	-	0	0	0	0	0	0	0	0	0	0	0	0	0	0	0	0	0	0	0	0	0	0	0	0	0	0	0	0	0	0
snRNA	ENSMMUG00000024155	4	153232829	153232926	+	0	0	0	0	0	0	0	0	0	0	0	0	0	0	0	0	0	0	0	0	0	0	0	0	0	0	0	0	0	0
snoRNA	ENSMMUG00000035970	4	154610573	154610676	+	0	0	0	0	0	0	0	0	0	0	0	0	0	0	0	0	0	0	0	0	0	0	0	0	0	0	0	0	0	0
snRNA	ENSMMUG00000024393	4	154829813	154829917	+	0	0	0	0	0	0	0	0	0	0	0	0	0	0	0	0	0	0	0	0	0	0	0	0	0	0	0	0	0	0
snRNA	ENSMMUG00000035786	4	155437699	155437802	-	0	0	0	0	0	0	0	0	0	0	0	0	0	0	0	0	0	0	0	0	0	0	0	0	0	0	0	0	0	0
snRNA	ENSMMUG00000025063	4	155490889	155490993	-	0	0	0	0	0	0	0	0	0	0	0	0	0	0	0	0	0	0	0	0	0	0	0	0	0	0	0	0	0	0
snRNA	ENSMMUG00000026287	4	155590254	155590360	-	0	0	0	0	0	0	0	0	0	0	0	0	0	0	0	0	0	0	0	0	0	0	0	0	0	0	0	0	0	0
snoRNA	ENSMMUG00000035896	4	155635404	155635506	-	0	0	0	0	0	0	0	0	0	0	0	0	0	0	0	0	0	0	0	0	0	0	0	0	0	0	0	0	0	0
snoRNA	ENSMMUG00000036440	4	155907922	155908051	+	0	0	0	0	0	0	0	0	0	0	0	0	0	0	0	0	0	0	0	0	0	0	0	0	0	0	0	0	0	0
snRNA	ENSMMUG00000035732	4	156711748	156711871	-	0	0	0	0	0	0	0	0	0	0	0	0	0	0	0	0	0	0	0	0	0	0	0	0	0	0	0	0	0	0
snoRNA	ENSMMUG00000025943	4	156768957	156769088	-	0	0	0	0	0	0	0	0	0	0	0	0	0	0	0	0	0	0	0	0	0	0	0	0	0	0	0	0	0	0
snoRNA	ENSMMUG00000025344	4	156774340	156774479	-	0	0	0	0	0	0	0	0	0	0	0	0	0	0	0	0	0	0	0	0	0	0	0	0	0	0	0	0	0	0
snRNA	ENSMMUG00000027448	4	162507545	162507648	-	0	0	0	0	0	0	0	0	0	0	0	0	0	0	0	0	0	0	0	0	0	0	0	0	0	0	0	0	0	0
snRNA	ENSMMUG00000027722	4	163125646	163125749	+	0	0	0	0	0	0	0	0	0	0	0	0	0	0	0	0	0	0	0	0	0	0	0	0	0	0	0	0	0	0
snRNA	ENSMMUG00000028200	4	167429979	167430085	-	0	0	0	0	0	0	0	0	0	0	0	0	0	0	0	0	0	0	0	0	0	0	0	0	0	0	0	0	0	0
snRNA	ENSMMUG00000036342	5	7152711	7152813	+	0	0	0	0	0	0	0	0	0	0	0	0	0	0	0	0	0	0	0	0	0	0	0	0	0	0	0	0	0	0
snoRNA	ENSMMUG00000024161	5	9486766	9486888	+	0	0	0	0	0	0	0	0	0	0	0	0	0	0	0	0	0	0	0	0	0	0	0	0	0	0	0	0	0	0
snRNA	ENSMMUG00000036473	5	10823250	10823361	-	0	0	0	0	0	0	0	0	0	0	0	0	0	0	0	0	0	0	0	0	0	0	0	0	0	0	0	0	0	0
snoRNA	ENSMMUG00000028178	5	12130069	12130205	-	0	0	0	0	0	0	0	0	0	0	0	0	0	0	0	0	0	0	0	0	0	0	0	0	0	0	0	0	1	0
snoRNA	ENSMMUG00000036437	5	12361168	12361271	+	0	0	0	0	0	0	0	0	0	0	0	0	0	0	0	0	0	0	0	0	0	0	0	0	0	0	0	0	0	0
snRNA	ENSMMUG00000027733	5	14907011	14907117	+	0	0	0	0	0	0	0	0	0	0	0	0	0	0	0	0	0	0	0	0	0	0	0	0	0	0	0	0	0	0
snRNA	ENSMMUG00000028232	5	16890685	16890791	+	0	0	0	0	0	0	0	0	0	0	0	0	0	0	0	0	0	0	0	0	0	0	0	0	0	0	0	0	0	0
snoRNA	ENSMMUG00000036112	5	17128285	17128389	+	0	0	0	0	0	0	0	0	0	0	0	0	0	0	0	0	0	0	0	0	0	0	0	0	0	0	0	0	0	0
snoRNA	ENSMMUG00000036302	5	18254169	18254280	+	0	0	0	0	0	0	0	0	0	0	0	0	0	0	0	0	0	0	0	0	0	0	0	0	0	0	0	0	0	0
snRNA	ENSMMUG00000036309	5	19931520	19931581	+	0	0	0	0	0	0	0	0	0	0	0	0	0	0	0	0	0	0	0	0	0	0	0	0	0	0	0	0	0	0
snRNA	ENSMMUG00000035116	5	20007038	20007131	+	0	0	0	0	0	0	0	0	0	0	0	0	0	0	0	0	0	0	0	0	0	0	0	0	0	0	0	0	0	0
snoRNA	ENSMMUG00000025407	5	21473180	21473259	+	0	0	0	0	0	0	0	0	0	0	0	0	0	0	0	0	0	0	0	0	0	0	0	0	0	0	0	0	0	0
tRNA	tRNA-Val-TAC-5-1	5	22182809	22182882	-	0	0	0	0	0	0	0	0	0	0	0	0	0	0	0	0	0	0	0	0	0	0	0	0	0	0	0	0	0	0
snRNA	ENSMMUG00000037404	5	24371268	24371360	+	0	0	0	0	0	0	0	0	0	0	0	0	0	0	0	0	0	0	0	0	0	0	0	0	0	0	0	0	0	0
snoRNA	ENSMMUG00000024922	5	26656572	26656660	-	0	0	0	0	0	0	0	0	0	0	0	0	0	0	0	0	0	0	0	0	0	0	0	0	0	0	0	0	0	0
snRNA	ENSMMUG00000035936	5	28748734	28748802	+	0	0	0	0	0	0	0	0	0	0	0	0	0	0	0	0	0	0	0	0	0	0	0	0	0	0	0	0	0	0
snoRNA	ENSMMUG00000035520	5	29948368	29948468	-	0	0	0	0	0	0	0	0	0	0	0	0	0	0	0	0	0	0	0	0	0	0	0	0	0	0	0	0	0	0
snRNA	ENSMMUG00000025894	5	30447572	30447677	+	0	0	0	0	0	0	0	0	0	0	0	0	0	0	0	0	0	0	0	0	0	0	0	0	0	0	0	0	0	0
tRNA	tRNA-His-GTG-3-5	5	31767524	31767596	-	0	0	0	0	0	0	0	0	0	0	0	0	0	0	0	0	0	0	0	0	0	0	0	0	0	0	0	0	0	0
snRNA	ENSMMUG00000036979	5	34606529	34606590	+	0	0	0	0	0	0	0	0	0	0	0	0	0	0	0	0	0	0	0	0	0	0	0	0	0	0	0	0	0	0
snRNA	ENSMMUG00000025882	5	35109933	35110032	+	0	0	0	0	0	0	0	0	0	0	0	0	0	0	0	0	0	0	0	0	0	0	0	0	0	0	0	0	0	0
snoRNA	ENSMMUG00000025863	5	35114836	35114975	+	0	0	0	0	0	0	0	0	0	0	0	0	0	0	0	0	0	0	0	0	0	0	0	0	0	0	0	0	0	0
snRNA	ENSMMUG00000036851	5	35407048	35407109	-	0	0	0	0	0	0	0	0	0	0	0	0	0	0	0	0	0	0	0	0	0	0	0	0	0	0	0	0	0	0
snoRNA	ENSMMUG00000035825	5	35901143	35901234	-	0	0	0	0	0	0	0	0	0	0	0	0	0	0	0	0	0	0	0	0	0	0	0	0	0	0	0	0	0	0
snRNA	ENSMMUG00000027700	5	36116811	36116917	+	0	0	0	0	0	0	0	0	0	0	0	0	0	0	0	0	0	0	0	0	0	0	0	0	0	0	0	0	0	0
snRNA	ENSMMUG00000028079	5	36147493	36147599	+	0	0	0	0	0	0	0	0	0	0	0	0	0	0	0	0	0	0	0	0	0	0	0	0	0	0	0	0	0	0
tRNA	tRNA-Gln-TTG-13-1	5	36282923	36282996	-	0	0	0	0	0	0	0	0	0	0	0	0	0	0	0	0	0	0	0	0	0	0	0	0	0	0	0	0	0	0
snRNA	ENSMMUG00000025764	5	36814594	36814756	-	0	0	0	0	0	0	0	0	0	0	0	0	0	0	0	0	0	0	0	0	0	0	0	0	0	0	0	0	0	0
snRNA	ENSMMUG00000034270	5	40668349	40668455	+	0	0	0	0	0	0	0	0	0	0	0	0	0	0	0	0	0	0	0	0	0	0	0	0	0	0	0	0	0	0
snRNA	ENSMMUG00000025302	5	41733329	41733434	-	0	0	0	0	0	0	0	0	0	0	0	0	0	0	0	0	0	0	0	0	0	0	0	0	0	0	0	0	0	0
snoRNA	ENSMMUG00000036185	5	42522914	42523017	-	0	0	0	0	0	0	0	0	0	0	0	0	0	0	0	0	0	0	0	0	0	0	0	0	0	0	0	0	0	0
snRNA	ENSMMUG00000026622	5	43373233	43373340	-	0	0	0	0	0	0	0	0	0	0	0	0	0	0	0	0	0	0	0	0	0	0	0	0	0	0	0	0	0	0
snRNA	ENSMMUG00000037234	5	43885306	43885375	-	0	0	0	0	0	0	0	0	0	0	0	0	0	0	0	0	0	0	0	0	0	0	0	0	0	0	0	0	0	0
snRNA	ENSMMUG00000036073	5	44233950	44234052	-	0	0	0	0	0	0	0	0	0	0	0	0	0	0	0	0	0	0	0	0	0	0	0	0	0	0	0	0	0	0
snRNA	ENSMMUG00000036467	5	44633325	44633425	+	0	0	0	0	0	0	0	0	0	0	0	0	0	0	0	0	0	0	0	0	0	0	0	0	0	0	0	0	0	0
snRNA	ENSMMUG00000026659	5	45305547	45305653	-	0	0	0	0	0	0	0	0	0	0	0	0	0	0	0	0	0	0	0	0	0	0	0	0	0	0	0	0	0	0
snRNA	ENSMMUG00000036835	5	46562641	46562746	-	0	0	0	0	0	0	0	0	0	0	0	0	0	0	0	0	0	0	0	0	0	0	0	0	0	0	0	0	0	0
snoRNA	ENSMMUG00000024882	5	47200673	47200739	+	0	0	0	0	0	0	0	0	0	0	0	0	0	0	0	0	0	0	0	0	0	0	0	0	0	0	0	0	0	0
snRNA	ENSMMUG00000033227	5	47413792	47413892	-	0	0	0	0	0	0	0	0	0	0	0	0	0	0	0	0	0	0	0	0	0	0	0	0	0	0	0	0	0	0
snoRNA	ENSMMUG00000036524	5	47645234	47645360	-	0	0	0	0	0	0	0	0	0	0	0	0	0	0	0	0	0	0	0	0	0	0	0	0	0	0	0	0	0	0
snRNA	ENSMMUG00000036519	5	48234480	48234595	-	0	0	0	0	0	0	0	0	0	0	0	0	0	0	0	0	0	0	0	0	0	0	0	0	0	0	0	0	0	0
snoRNA	ENSMMUG00000033112	5	49736921	49737055	-	0	0	0	0	0	0	0	0	0	0	0	0	0	0	0	0	0	0	0	0	0	0	0	0	0	0	0	0	0	0
snoRNA	ENSMMUG00000027387	5	50742437	50742568	-	0	0	0	0	0	0	0	0	0	0	0	0	0	0	0	0	0	0	0	0	0	0	0	0	0	0	0	0	0	0
snoRNA	ENSMMUG00000036956	5	50969178	50969280	+	0	0	0	0	0	0	0	0	0	0	0	0	0	0	0	0	0	0	0	0	0	0	0	0	0	0	0	0	0	0
snoRNA	ENSMMUG00000034045	5	51868873	51868931	+	0	0	0	0	0	0	0	0	0	0	0	0	0	0	0	0	0	0	0	0	0	0	0	0	0	0	0	0	0	0
snRNA	ENSMMUG00000034236	5	52431451	52431567	+	0	0	0	0	0	0	0	0	0	0	0	0	0	0	0	0	0	0	0	0	0	0	0	0	0	0	0	0	0	0
snoRNA	ENSMMUG00000026786	5	53185366	53185437	-	0	0	0	0	0	0	0	0	0	0	0	0	0	0	0	0	0	0	0	0	0	0	0	0	0	0	0	0	0	0
snRNA	ENSMMUG00000033232	5	53231956	53232061	+	0	0	0	0	0	0	0	0	0	0	0	0	0	0	0	0	0	0	0	0	0	0	0	0	0	0	0	0	0	0
snRNA	ENSMMUG00000034389	5	53749493	53749634	+	0	0	0	0	0	0	0	0	0	0	0	0	0	0	0	0	0	0	0	0	0	0	0	0	0	0	0	0	0	0
snoRNA	ENSMMUG00000034006	5	56421461	56421589	-	0	0	0	0	0	0	0	0	0	0	0	0	0	0	0	0	0	0	0	0	0	0	0	0	0	0	0	0	0	0
snRNA	ENSMMUG00000026721	5	58782571	58782681	-	0	0	0	0	0	0	0	0	0	0	0	0	0	0	0	0	0	0	0	0	0	0	0	0	0	0	0	0	0	0
snRNA	ENSMMUG00000037419	5	58786910	58786995	+	0	0	0	0	0	0	0	0	0	0	0	0	0	0	0	0	0	0	0	0	0	0	0	0	0	0	0	0	0	0
snRNA	ENSMMUG00000027898	5	58936879	58936984	+	0	0	0	0	0	0	0	0	0	0	0	0	0	0	0	0	0	0	0	0	0	0	0	0	0	0	0	0	0	0
snRNA	ENSMMUG00000034715	5	58938773	58938876	-	0	0	0	0	0	0	0	0	0	0	0	0	0	0	0	0	0	0	0	0	0	0	0	0	0	0	0	0	0	0
snRNA	ENSMMUG00000027776	5	61347495	61347601	-	0	0	0	0	0	0	0	0	0	0	0	0	0	0	0	0	0	0	0	0	0	0	0	0	0	0	0	0	0	0
snoRNA	ENSMMUG00000025423	5	61625596	61625746	-	0	0	0	0	0	0	0	0	0	0	0	0	0	0	0	0	0	0	0	0	0	0	0	0	0	0	0	0	0	0
snRNA	ENSMMUG00000027929	5	61941236	61941399	+	0	0	0	0	0	0	0	0	0	0	0	0	0	0	0	0	0	0	0	0	0	0	0	0	0	0	0	0	0	0
snRNA	ENSMMUG00000036509	5	62448391	62448500	-	0	0	0	0	0	0	0	0	0	0	0	0	0	0	0	0	0	0	0	0	0	0	0	0	0	0	0	0	0	0
tRNA	tRNA-Thr-TGT-6-1	5	62803460	62803532	+	0	0	0	0	0	0	0	0	0	0	0	0	0	0	0	0	0	0	0	0	0	0	0	0	0	0	0	0	0	0
snRNA	ENSMMUG00000034443	5	63585546	63585742	+	0	0	0	0	0	0	0	0	0	0	0	0	0	0	0	0	0	0	0	0	0	0	0	0	0	0	0	0	0	0
snRNA	ENSMMUG00000027821	5	65726170	65726333	-	1	2	1	0	0	3	0	1	0	1	0	0	0	1	0	1	1	1	0	0	0	0	0	0	1	1	0	2	3	0
snRNA	ENSMMUG00000035613	5	69554054	69554158	-	0	0	0	0	0	0	0	0	0	0	0	0	0	0	0	0	0	0	0	0	0	0	0	0	0	0	0	0	0	0
snoRNA	ENSMMUG00000036574	5	71881991	71882095	+	0	0	0	0	0	0	0	0	0	0	0	0	0	0	0	0	0	0	0	0	0	0	0	0	0	0	0	0	0	0
snoRNA	ENSMMUG00000035703	5	72274837	72274939	+	0	0	0	0	0	0	0	0	0	0	0	0	0	0	0	0	0	0	0	0	0	0	0	0	0	0	0	0	0	0
snoRNA	ENSMMUG00000036824	5	72384078	72384171	-	0	0	0	0	0	0	0	0	0	0	0	0	0	0	0	0	0	0	0	0	0	0	0	0	0	0	0	0	0	0
snRNA	ENSMMUG00000036724	5	73086688	73086792	+	0	0	0	0	0	0	0	0	0	0	0	0	0	0	0	0	0	0	0	0	0	0	0	0	0	0	0	0	0	0
snRNA	ENSMMUG00000023914	5	73493108	73493207	-	0	0	0	0	0	0	0	0	0	0	0	0	0	0	0	0	0	0	0	0	0	0	0	0	0	0	0	0	0	0
snRNA	ENSMMUG00000024793	5	73583592	73583688	-	0	0	0	0	0	0	0	0	0	0	0	0	0	0	0	0	0	0	0	0	0	0	0	0	0	0	0	0	0	0
snRNA	ENSMMUG00000025835	5	74106255	74106363	-	0	0	0	0	0	0	0	0	0	0	0	0	0	0	0	0	0	0	0	0	0	0	0	0	0	0	0	0	0	0
snRNA	ENSMMUG00000037325	5	74359345	74359451	+	0	0	0	0	0	0	0	0	0	0	0	0	0	0	0	0	0	0	0	0	0	0	0	0	0	0	0	0	0	0
snoRNA	ENSMMUG00000036906	5	75268668	75268772	+	0	0	0	0	0	0	0	0	0	0	0	0	0	0	0	0	0	0	0	0	0	0	0	0	0	0	0	0	0	0
snRNA	ENSMMUG00000026676	5	76136083	76136189	+	0	0	0	0	0	0	0	0	0	0	0	0	0	0	0	0	0	0	0	0	0	0	0	0	0	0	0	0	0	0
snoRNA	ENSMMUG00000032849	5	76648109	76648232	-	0	0	0	0	0	0	0	0	0	0	0	0	0	0	0	0	0	0	0	0	0	0	0	0	0	0	0	0	0	0
snoRNA	ENSMMUG00000032928	5	76677863	76677984	-	0	0	0	0	0	0	0	0	0	0	0	0	0	0	0	0	0	0	0	0	0	0	0	0	0	0	0	0	0	0
snRNA	ENSMMUG00000034526	5	76888489	76888638	+	0	0	0	0	0	0	0	0	0	0	0	0	0	0	0	0	0	0	0	0	0	0	0	0	0	0	0	0	0	0
snoRNA	ENSMMUG00000037242	5	76896189	76896289	-	0	0	0	0	0	0	0	0	0	0	0	0	0	0	0	0	0	0	0	0	0	0	0	0	0	0	0	0	0	0
snoRNA	ENSMMUG00000036193	5	80731540	80731642	-	0	0	0	0	0	0	0	0	0	0	0	0	0	0	0	0	0	0	0	0	0	0	0	0	0	0	0	0	0	0
snRNA	ENSMMUG00000026128	5	80965824	80965987	+	0	0	0	0	0	0	0	0	0	0	0	0	0	0	0	0	0	0	0	0	0	0	0	0	0	0	0	0	0	0
snRNA	ENSMMUG00000028039	5	81162631	81162738	+	0	0	0	0	0	0	0	0	0	0	0	0	0	0	0	0	0	0	0	0	0	0	0	0	0	0	0	0	0	0
snRNA	ENSMMUG00000034107	5	81167381	81167506	-	0	0	0	0	0	0	0	0	0	0	0	0	0	0	0	0	0	0	0	0	0	0	0	0	0	0	0	0	0	0
snRNA	ENSMMUG00000032865	5	81190300	81190406	+	0	0	0	0	0	0	0	0	0	0	0	0	0	0	0	0	0	0	0	0	0	0	0	0	0	0	0	0	0	0
snRNA	ENSMMUG00000027683	5	81236092	81236195	-	0	0	0	0	0	0	0	0	0	0	0	0	0	0	0	0	0	0	0	0	0	0	0	0	0	0	0	0	0	0
snRNA	ENSMMUG00000032793	5	82077213	82077316	+	0	0	0	0	0	0	0	0	0	0	0	0	0	0	0	0	0	0	0	0	0	0	0	0	0	0	0	0	0	0
tRNA	tRNA-Leu-TAA-11-1	5	86643120	86643195	+	0	0	0	0	0	0	0	0	0	0	0	0	0	0	0	0	0	0	0	0	0	0	0	0	0	0	0	0	0	0
snRNA	ENSMMUG00000035422	5	88825471	88825565	-	0	0	0	0	0	0	0	0	0	0	0	0	0	0	0	0	0	0	0	0	0	0	0	0	0	0	0	0	0	0
snRNA	ENSMMUG00000034347	5	94704229	94704315	+	0	0	0	0	0	0	0	0	0	0	0	0	0	0	0	0	0	0	0	0	0	0	0	0	0	0	0	0	0	0
snoRNA	ENSMMUG00000036053	5	95840230	95840334	-	0	0	0	0	0	0	0	0	0	0	0	0	0	0	0	0	0	0	0	0	0	0	0	0	0	0	0	0	0	0
snoRNA	ENSMMUG00000033194	5	96478984	96479051	+	0	0	0	0	0	0	0	0	0	0	0	0	0	0	0	0	0	0	0	0	0	0	0	0	0	0	0	0	0	0
snRNA	ENSMMUG00000036878	5	96948312	96948418	+	0	0	0	0	0	0	0	0	0	0	0	0	0	0	0	0	0	0	0	0	0	0	0	0	0	0	0	0	0	0
snRNA	ENSMMUG00000036109	5	98030808	98030918	+	0	0	0	0	0	0	0	0	0	0	0	0	0	0	0	0	0	0	0	0	0	0	0	0	0	0	0	0	0	0
snoRNA	ENSMMUG00000037074	5	98174073	98174208	+	0	0	0	0	0	0	0	0	0	0	0	0	0	0	0	0	0	0	0	0	0	0	0	0	0	0	0	0	0	0
snRNA	ENSMMUG00000035565	5	100383942	100384044	+	0	0	0	0	0	0	0	0	0	0	0	0	0	0	0	0	0	0	0	0	0	0	0	0	0	0	0	0	0	0
snRNA	ENSMMUG00000034942	5	100799672	100799776	-	0	0	0	0	0	0	0	0	0	0	0	0	0	0	0	0	0	0	0	0	0	0	0	0	0	0	0	0	0	0
snRNA	ENSMMUG00000032903	5	103182471	103182577	+	0	0	0	0	0	0	0	0	0	0	0	0	0	0	0	0	0	0	0	0	0	0	0	0	0	0	0	0	0	0
snRNA	ENSMMUG00000033008	5	104230291	104230397	+	0	0	0	0	0	0	0	0	0	0	0	0	0	0	0	0	0	0	0	0	0	0	0	0	0	0	0	0	0	0
snRNA	ENSMMUG00000028097	5	106273989	106274152	+	0	0	0	0	0	0	0	0	0	0	0	0	0	0	0	0	0	0	0	0	0	0	0	0	0	0	0	0	0	0
snoRNA	ENSMMUG00000036273	5	108752522	108752623	-	0	0	0	0	0	0	0	0	0	0	0	0	0	0	0	0	0	0	0	0	0	0	0	0	0	0	0	0	0	0
snRNA	ENSMMUG00000028469	5	109703940	109704046	+	0	0	0	0	0	0	0	0	0	0	0	0	0	0	0	0	0	0	0	0	0	0	0	0	0	0	0	0	0	0
snoRNA	ENSMMUG00000025353	5	111124463	111124593	+	1	3	2	1	1	1	1	2	1	1	1	1	1	2	0	2	3	0	2	1	3	1	1	0	1	1	2	2	3	2
snoRNA	ENSMMUG00000033737	5	111995931	111996057	+	0	0	0	0	0	0	0	0	0	0	0	0	0	0	0	0	0	0	0	0	0	0	0	0	0	0	0	0	0	0
snRNA	ENSMMUG00000034765	5	113179459	113179559	+	0	0	0	0	0	0	0	0	0	0	0	0	0	0	0	0	0	0	0	0	0	0	0	0	0	0	0	0	0	0
snRNA	ENSMMUG00000027469	5	113575490	113575596	-	0	0	0	0	0	0	0	0	0	0	0	0	0	0	0	0	0	0	0	0	0	0	0	0	0	0	0	0	0	0
snRNA	ENSMMUG00000028342	5	118409040	118409143	+	0	0	0	0	0	0	0	0	0	0	0	0	0	0	0	0	0	0	0	0	0	0	0	0	0	0	0	0	0	0
snRNA	ENSMMUG00000028399	5	118463328	118463434	+	0	0	0	0	0	0	0	1	0	0	0	0	0	0	0	1	0	0	0	0	0	0	0	0	0	0	0	0	1	0
snRNA	ENSMMUG00000035535	5	120201513	120201604	+	0	0	0	0	0	0	0	0	0	0	0	0	0	0	0	0	0	0	0	0	0	0	0	0	0	0	0	0	0	0
snoRNA	ENSMMUG00000036094	5	121079227	121079330	+	0	0	0	0	0	0	0	0	0	0	0	0	0	0	0	0	0	0	0	0	0	0	0	0	0	0	0	0	0	0
snRNA	ENSMMUG00000027727	5	123607137	123607243	+	0	0	0	0	0	0	0	0	0	0	0	0	0	0	0	0	0	0	0	0	0	0	0	0	0	0	0	0	0	0
snoRNA	ENSMMUG00000036561	5	124063406	124063531	+	0	0	0	0	0	0	0	0	0	0	0	0	0	0	0	0	0	0	0	0	0	0	0	0	0	0	0	0	0	0
snRNA	ENSMMUG00000027698	5	126306141	126306257	-	0	0	0	0	0	0	0	0	0	0	0	0	0	0	0	0	0	0	0	0	0	0	0	0	0	0	0	0	0	0
snRNA	ENSMMUG00000024534	5	127696354	127696458	-	0	0	0	0	0	0	0	0	0	0	0	0	0	0	0	0	0	0	0	0	0	0	0	0	0	0	0	0	0	0
snRNA	ENSMMUG00000037164	5	130799273	130799334	+	0	0	0	0	0	0	0	0	0	0	0	0	0	0	0	0	0	0	0	0	0	0	0	0	0	0	0	0	0	0
snRNA	ENSMMUG00000036099	5	131510465	131510569	+	0	0	0	0	0	0	0	0	0	0	0	0	0	0	0	0	0	0	0	0	0	0	0	0	0	0	0	0	0	0
snRNA	ENSMMUG00000035624	5	131693364	131693457	-	0	0	0	0	0	0	0	0	0	0	0	0	0	0	0	0	0	0	0	0	0	0	0	0	0	0	0	0	0	0
snRNA	ENSMMUG00000024316	5	131721499	131721605	-	0	0	0	0	0	0	0	0	0	0	0	0	0	0	0	0	0	0	0	0	0	0	0	0	0	0	0	0	0	0
snRNA	ENSMMUG00000027981	5	131784477	131784585	+	0	0	0	0	0	0	0	0	0	0	0	0	0	0	0	0	0	0	0	0	0	0	0	0	0	0	0	0	0	0
snoRNA	ENSMMUG00000036113	5	132734789	132734860	-	0	0	0	0	0	0	0	0	0	0	0	0	0	0	0	0	0	0	0	0	0	0	0	0	0	0	0	0	0	0
snoRNA	ENSMMUG00000037253	5	133751461	133751565	-	0	0	0	0	0	0	0	0	0	0	0	0	0	0	0	0	0	0	0	0	0	0	0	0	0	0	0	0	0	0
snRNA	ENSMMUG00000028035	5	135635402	135635508	+	0	0	0	0	0	0	0	0	0	0	0	0	0	0	0	0	0	0	0	0	0	0	0	0	0	0	0	0	0	0
snRNA	ENSMMUG00000024539	5	138715828	138715990	+	0	0	0	0	0	0	0	0	0	0	0	0	0	0	0	0	0	0	0	0	0	0	0	0	0	0	0	0	0	0
snRNA	ENSMMUG00000036184	5	141204848	141204909	-	0	0	0	0	0	0	0	0	0	0	0	0	0	0	0	0	0	0	0	0	0	0	0	0	0	0	0	0	0	0
snRNA	ENSMMUG00000024348	5	142169905	142170012	+	0	0	0	0	0	0	0	0	0	0	0	0	0	0	0	0	0	0	0	0	0	0	0	0	0	0	0	0	0	0
snRNA	ENSMMUG00000037348	5	142441392	142441452	+	0	0	0	0	0	0	0	0	0	0	0	0	0	0	0	0	0	0	0	0	0	0	0	0	0	0	0	0	0	0
snoRNA	ENSMMUG00000032726	5	143348285	143348350	+	0	0	0	0	0	0	1	0	1	0	0	0	0	0	0	0	0	0	1	0	2	0	1	0	0	1	0	1	1	0
snRNA	ENSMMUG00000036373	5	145467910	145468004	-	0	0	0	0	0	0	0	0	0	0	0	0	0	0	0	0	0	0	0	0	0	0	0	0	0	0	0	0	0	0
snRNA	ENSMMUG00000033252	5	146746412	146746516	-	0	0	0	0	0	0	0	0	0	0	0	0	0	0	0	0	0	0	0	0	0	0	0	0	0	0	0	0	0	0
snRNA	ENSMMUG00000034271	5	146994757	146994917	+	0	0	0	0	0	0	0	0	0	0	0	0	0	0	0	0	0	0	0	0	0	0	0	0	0	0	0	0	0	0
snoRNA	ENSMMUG00000028422	5	148377834	148377967	+	0	0	0	0	0	0	0	0	0	0	0	0	0	0	0	0	0	0	0	0	0	0	0	0	0	0	0	0	0	0
snRNA	ENSMMUG00000026084	5	149416629	149416735	-	0	0	0	0	0	0	0	0	0	0	0	0	0	0	0	0	0	0	0	0	0	0	0	0	0	0	0	0	0	0
snRNA	ENSMMUG00000027360	5	150596818	150596958	+	0	0	0	0	0	0	0	0	0	0	0	0	0	0	0	0	0	0	0	0	0	0	0	0	0	0	0	0	0	0
snoRNA	ENSMMUG00000033148	5	150873318	150873529	+	0	0	0	0	0	0	0	0	0	0	0	0	0	0	0	0	0	0	0	0	0	0	0	0	0	0	0	0	0	0
snRNA	ENSMMUG00000027538	5	150964545	150964651	-	0	0	0	0	0	0	0	0	0	0	0	0	0	0	0	0	0	0	0	0	0	0	0	0	0	0	0	0	0	0
snoRNA	ENSMMUG00000036615	5	151680412	151680542	-	0	0	0	0	0	0	0	0	0	0	0	0	0	0	0	0	0	0	0	0	0	0	0	0	0	0	0	0	0	0
snRNA	ENSMMUG00000028494	5	156834933	156835038	+	0	0	0	0	0	0	0	0	0	0	0	0	0	0	0	0	0	0	0	0	0	0	0	0	0	0	0	0	0	0
snRNA	ENSMMUG00000028152	5	156994919	156995025	+	0	0	0	0	0	0	0	0	0	0	0	0	0	0	0	0	0	0	0	0	0	0	0	0	0	0	0	0	0	0
snRNA	ENSMMUG00000035177	5	157431840	157431920	+	0	0	0	0	0	0	0	0	0	0	0	0	0	0	0	0	0	0	0	0	0	0	0	0	0	0	0	0	0	0
snoRNA	ENSMMUG00000037223	5	160452297	160452400	+	0	0	0	0	0	0	0	0	0	0	0	0	0	0	0	0	0	0	0	0	0	0	0	0	0	0	0	0	0	0
snoRNA	ENSMMUG00000026502	5	160600797	160600926	+	0	0	0	0	0	0	0	0	0	0	0	0	0	0	0	0	0	0	0	0	0	0	0	0	0	0	0	0	0	0
snRNA	ENSMMUG00000027918	5	160814420	160814528	-	0	0	0	0	0	0	0	0	0	0	0	0	0	0	0	0	0	0	0	0	0	0	0	0	0	0	0	0	0	0
snRNA	ENSMMUG00000026482	5	161014458	161014560	+	0	0	0	0	0	0	0	0	0	0	0	0	0	0	0	0	0	0	0	0	0	0	0	0	0	0	0	0	0	0
snRNA	ENSMMUG00000032776	5	165502208	165502309	-	0	0	0	0	0	0	0	0	0	0	0	0	0	0	0	0	0	0	0	0	0	0	0	0	0	0	0	0	0	0
snoRNA	ENSMMUG00000025856	5	168175851	168175983	+	0	0	0	0	0	0	0	0	0	0	0	0	0	0	0	0	0	0	0	0	0	0	0	0	0	0	0	0	0	0
snRNA	ENSMMUG00000035715	5	169701653	169701715	+	0	0	0	0	0	0	0	0	0	0	0	0	0	0	0	0	0	0	0	0	0	0	0	0	0	0	0	0	0	0
snRNA	ENSMMUG00000036755	5	170258299	170258411	-	0	0	0	0	0	0	0	0	0	0	0	0	0	0	0	0	0	0	0	0	0	0	0	0	0	0	0	0	0	0
snoRNA	ENSMMUG00000032749	5	170802071	170802141	-	0	0	0	0	0	0	0	0	0	0	0	0	0	0	0	0	0	0	0	0	0	0	0	0	0	0	0	0	0	0
snRNA	ENSMMUG00000035443	5	174662136	174662247	+	0	0	0	0	0	0	0	0	0	0	0	0	0	0	0	0	0	0	0	0	0	0	0	0	0	0	0	0	0	0
snRNA	ENSMMUG00000036601	5	175273052	175273121	-	0	0	0	0	0	0	0	0	0	0	0	0	0	0	0	0	0	0	0	0	0	0	0	0	0	0	0	0	0	0
snoRNA	ENSMMUG00000036789	5	175280757	175280952	-	0	0	0	0	0	0	0	0	0	0	0	0	0	0	0	0	0	0	0	0	0	0	0	0	0	0	0	0	0	0
snoRNA	ENSMMUG00000035689	5	175380687	175380790	-	0	0	0	0	0	0	0	0	0	0	0	0	0	0	0	0	0	0	0	0	0	0	0	0	0	0	0	0	0	0
snoRNA	ENSMMUG00000036253	5	175434581	175434684	+	0	0	0	0	0	0	0	0	0	0	0	0	0	0	0	0	0	0	0	0	0	0	0	0	0	0	0	0	0	0
snoRNA	ENSMMUG00000036500	5	175692408	175692522	-	0	0	0	0	0	0	0	0	0	0	0	0	0	0	0	0	0	0	0	0	0	0	0	0	0	0	0	0	0	0
snRNA	ENSMMUG00000035495	5	175764717	175764821	-	0	0	0	0	0	0	0	0	0	0	0	0	0	0	0	0	0	0	0	0	0	0	0	0	0	0	0	0	0	0
snRNA	ENSMMUG00000024073	5	175786448	175786554	-	0	0	0	0	0	0	0	0	0	0	0	0	0	0	0	0	0	0	0	0	0	0	0	0	0	0	0	0	0	0
snRNA	ENSMMUG00000037411	5	175819484	175819584	+	0	0	0	0	0	0	0	0	0	0	0	0	0	0	0	0	0	0	0	0	0	0	0	0	0	0	0	0	0	0
snoRNA	ENSMMUG00000034790	5	176542692	176542775	+	0	0	0	0	0	0	0	0	0	0	0	0	0	0	0	0	0	0	0	0	0	0	0	0	0	0	0	0	0	0
snRNA	ENSMMUG00000035242	5	177467129	177467316	-	0	0	0	0	0	0	0	0	0	0	0	0	0	0	0	0	0	0	0	0	0	0	0	0	0	0	0	0	0	0
snoRNA	ENSMMUG00000036041	5	178069391	178069494	+	0	0	0	0	0	0	0	0	0	0	0	0	0	0	0	0	0	0	0	0	0	0	0	0	0	0	0	0	0	0
snRNA	ENSMMUG00000034845	5	178153565	178153695	-	0	0	0	0	0	0	0	0	0	0	0	0	0	0	0	0	0	0	0	0	0	0	0	0	0	0	0	0	0	0
snRNA	ENSMMUG00000034684	5	178614943	178615049	+	0	0	0	0	0	0	0	0	0	0	0	0	0	0	0	0	0	0	0	0	0	0	0	0	0	0	0	0	0	0
snRNA	ENSMMUG00000027318	5	180260794	180260897	-	0	0	0	0	0	0	0	0	0	0	0	0	0	0	0	0	0	0	0	0	0	0	0	0	0	0	0	0	0	0
snRNA	ENSMMUG00000036673	5	180821612	180821672	-	0	0	0	0	0	0	0	0	0	0	0	0	0	0	0	0	0	0	0	0	0	0	0	0	0	0	0	0	0	0
snRNA	ENSMMUG00000026747	5	181772691	181772872	-	0	0	0	0	0	0	0	0	0	0	0	0	0	0	0	0	0	0	0	0	0	0	0	0	0	0	0	0	0	0
snRNA	ENSMMUG00000025262	6	7845099	7845259	+	0	0	0	0	0	0	0	0	0	0	0	0	0	0	0	0	0	0	0	0	0	0	0	0	0	0	0	0	0	0
snoRNA	ENSMMUG00000035865	6	9462135	9462204	+	0	0	0	0	0	0	0	0	0	0	0	0	0	0	0	0	0	0	0	0	0	0	0	0	0	0	0	0	0	0
snRNA	ENSMMUG00000023863	6	10963610	10963717	+	0	0	0	0	0	0	0	0	0	0	0	0	0	0	0	0	0	0	0	0	0	0	0	0	0	0	0	0	0	0
snRNA	ENSMMUG00000037395	6	12257465	12257570	-	0	0	0	0	0	0	0	0	0	0	0	0	0	0	0	0	0	0	0	0	0	0	0	0	0	0	0	0	0	0
snoRNA	ENSMMUG00000023988	6	15307640	15307774	-	0	0	0	0	0	0	0	0	0	0	0	0	0	0	0	0	0	0	0	0	0	0	0	0	0	0	0	0	0	0
snRNA	ENSMMUG00000036153	6	17442178	17442282	+	0	0	0	0	0	0	0	0	0	0	0	0	0	0	0	0	0	0	0	0	0	0	0	0	0	0	0	0	0	0
snoRNA	ENSMMUG00000033202	6	18290012	18290088	+	0	0	0	0	0	0	0	0	0	0	0	0	0	0	0	0	0	0	0	0	0	0	0	0	0	0	0	0	0	0
snoRNA	ENSMMUG00000035842	6	18886176	18886271	+	0	0	0	0	0	0	0	0	0	0	0	0	0	0	0	0	0	0	0	0	0	0	0	0	0	0	0	0	0	0
tRNA	tRNA-Leu-TAA-10-1	6	20915482	20915557	-	0	0	0	0	0	0	0	0	0	0	0	0	0	0	0	0	0	0	0	0	0	0	0	0	0	0	0	0	0	0
snRNA	ENSMMUG00000026703	6	21076137	21076241	+	0	0	0	0	0	0	0	0	0	0	0	0	0	0	0	0	0	0	0	0	0	0	0	0	0	0	0	0	0	0
snoRNA	ENSMMUG00000036396	6	24001890	24001996	-	0	0	0	0	0	0	0	0	0	0	0	0	0	0	0	0	0	0	0	0	0	0	0	0	0	0	0	0	0	0
snRNA	ENSMMUG00000036340	6	25729917	25730025	-	0	0	0	0	0	0	0	0	0	0	0	0	0	0	0	0	0	0	0	0	0	0	0	0	0	0	0	0	0	0
snRNA	ENSMMUG00000034609	6	26052476	26052613	+	0	0	0	0	0	0	0	0	0	0	0	0	0	0	0	0	0	0	0	0	0	0	0	0	0	0	0	0	0	0
snRNA	ENSMMUG00000025467	6	27155218	27155323	+	0	0	0	0	0	0	0	0	0	0	0	0	0	0	0	0	0	0	0	0	0	0	0	0	0	0	0	0	0	0
snRNA	ENSMMUG00000036680	6	28639643	28639749	+	0	0	0	0	0	0	0	0	0	0	0	0	0	0	0	0	0	0	0	0	0	0	0	0	0	0	0	0	0	0
snoRNA	ENSMMUG00000036107	6	29125830	29125956	+	0	0	0	0	0	0	0	0	0	0	0	0	0	0	0	0	0	0	0	0	0	0	0	0	0	0	0	0	0	0
snRNA	ENSMMUG00000027624	6	31672296	31672402	-	0	0	0	0	0	0	0	0	0	0	0	0	0	0	0	0	0	0	0	0	0	0	0	0	0	0	0	0	0	0
snRNA	ENSMMUG00000036916	6	31900989	31901073	-	0	0	0	0	0	0	0	0	0	0	0	0	0	0	0	0	0	0	0	0	0	0	0	0	0	0	0	0	0	0
snoRNA	ENSMMUG00000036535	6	31904931	31905034	+	0	0	0	0	0	0	0	0	0	0	0	0	0	0	0	0	0	0	0	0	0	0	0	0	0	0	0	0	0	0
snRNA	ENSMMUG00000025390	6	32331809	32331904	-	0	0	0	0	0	0	0	0	0	0	0	0	0	0	0	0	0	0	0	0	0	0	0	0	0	0	0	0	0	0
snRNA	ENSMMUG00000027921	6	32410058	32410164	+	0	0	0	0	0	0	0	0	0	0	0	0	0	0	0	0	0	0	0	0	0	0	0	0	0	0	0	0	0	0
snRNA	ENSMMUG00000037320	6	33994618	33994721	-	0	0	0	0	0	0	0	0	0	0	0	0	0	0	0	0	0	0	0	0	0	0	0	0	0	0	0	0	0	0
tRNA	tRNA-Ser-TGA-9-2	6	34051207	34051276	-	0	0	0	0	0	0	0	0	0	0	0	0	0	0	0	0	0	0	0	0	0	0	0	0	0	0	0	0	0	0
tRNA	tRNA-Ser-TGA-9-3	6	34052511	34052580	-	0	0	0	0	0	0	0	0	0	0	0	0	0	0	0	0	0	0	0	0	0	0	0	0	0	0	0	0	0	0
snoRNA	ENSMMUG00000025942	6	35198057	35198269	+	0	0	0	0	0	0	0	0	0	0	0	0	0	0	0	0	0	0	0	0	0	0	0	0	0	0	0	0	0	0
snRNA	ENSMMUG00000037249	6	35386706	35386766	-	0	0	0	0	0	0	0	0	0	0	0	0	0	0	0	0	0	0	0	0	0	0	0	0	0	0	0	0	0	0
snRNA	ENSMMUG00000024786	6	35947326	35947428	+	0	0	0	0	0	0	0	0	0	0	0	0	0	0	0	0	0	0	0	0	0	0	0	0	0	0	0	0	0	0
snRNA	ENSMMUG00000037251	6	37168040	37168101	+	0	0	0	0	0	0	0	0	0	0	0	0	0	0	0	0	0	0	0	0	0	0	0	0	0	0	0	0	0	0
snRNA	ENSMMUG00000034969	6	37468259	37468362	-	0	0	0	0	0	0	0	0	0	0	0	0	0	0	0	0	0	0	0	0	0	0	0	0	0	0	0	0	0	0
snRNA	ENSMMUG00000028526	6	37543677	37543783	-	0	0	0	0	0	0	0	0	0	0	0	0	0	0	0	0	0	0	0	0	0	0	0	0	0	0	0	0	0	0
snRNA	ENSMMUG00000024503	6	40087563	40087724	+	0	0	0	0	0	0	0	0	0	0	0	0	0	0	0	0	0	0	0	0	0	0	0	0	0	0	0	0	0	0
snoRNA	ENSMMUG00000025207	6	40490858	40490989	+	0	0	0	0	0	0	0	0	0	0	0	0	0	0	0	0	0	0	0	0	0	0	0	0	0	0	0	0	0	0
snoRNA	ENSMMUG00000033140	6	40629878	40630013	-	0	0	0	0	0	0	0	0	0	0	0	0	0	0	0	0	0	0	0	0	0	0	0	0	0	0	0	0	0	0
snoRNA	ENSMMUG00000032834	6	40672898	40672977	-	0	0	0	0	0	0	0	0	1	0	0	2	0	0	0	0	0	0	0	0	1	0	0	0	0	0	0	0	1	0
snRNA	ENSMMUG00000035796	6	40756734	40756795	-	0	0	0	0	0	0	0	0	0	0	0	0	0	0	0	0	0	0	0	0	0	0	0	0	0	0	0	0	0	0
snRNA	ENSMMUG00000035406	6	44132425	44132532	-	0	0	0	0	0	0	0	0	0	0	0	0	0	0	0	0	0	0	0	0	0	0	0	0	0	0	0	0	0	0
snoRNA	ENSMMUG00000023904	6	47972831	47972958	+	0	0	0	0	0	0	0	0	0	0	0	0	0	0	0	0	0	0	0	0	0	0	0	0	0	0	0	0	0	0
snRNA	ENSMMUG00000028381	6	48601517	48601623	-	0	0	0	0	0	0	0	0	0	0	0	0	0	0	0	0	0	0	0	0	0	0	0	0	0	0	0	0	0	0
snRNA	ENSMMUG00000032982	6	48717370	48717477	-	0	0	0	0	0	0	0	0	0	0	0	0	0	0	0	0	0	0	0	0	0	0	0	0	0	0	0	0	0	0
snoRNA	ENSMMUG00000035984	6	48876751	48876846	+	0	0	0	0	0	0	0	0	0	0	0	0	0	0	0	0	0	0	0	0	0	0	0	0	0	0	0	0	0	0
snRNA	ENSMMUG00000036740	6	51572311	51572414	-	0	0	0	0	0	0	0	0	0	0	0	0	0	0	0	0	0	0	0	0	0	0	0	0	0	0	0	0	0	0
snRNA	ENSMMUG00000034742	6	53772453	53772557	+	0	0	0	0	0	0	0	0	0	0	0	0	0	0	0	0	0	0	0	0	0	0	0	0	0	0	0	0	0	0
snoRNA	ENSMMUG00000037078	6	54520146	54520249	+	0	0	0	0	0	0	0	0	0	0	0	0	0	0	0	0	0	0	0	0	0	0	0	0	0	0	0	0	0	0
snoRNA	ENSMMUG00000036066	6	55740352	55740455	+	0	0	0	0	0	0	0	0	0	0	0	0	0	0	0	0	0	0	0	0	0	0	0	0	0	0	0	0	0	0
tRNA	tRNA-Sup-CTA-1-1	6	57638322	57638405	+	0	0	0	0	0	0	0	0	0	0	0	0	0	0	0	0	0	0	0	0	0	0	0	0	0	0	0	0	0	0
snRNA	ENSMMUG00000028453	6	57979679	57979784	-	0	0	0	0	0	0	0	0	0	0	0	0	0	0	0	0	0	0	0	0	0	0	0	0	0	0	0	0	0	0
snRNA	ENSMMUG00000034266	6	59372699	59372793	-	0	0	0	0	0	0	0	0	0	0	0	0	0	0	0	0	0	0	0	0	0	0	0	0	0	0	0	0	0	0
snRNA	ENSMMUG00000034605	6	59375590	59375684	+	0	0	0	0	0	0	0	0	0	0	0	0	0	0	0	0	0	0	0	0	0	0	0	0	0	0	0	0	0	0
snRNA	ENSMMUG00000036910	6	60176430	60176528	+	0	0	0	0	0	0	0	0	0	0	0	0	0	0	0	0	0	0	0	0	0	0	0	0	0	0	0	0	0	0
snRNA	ENSMMUG00000026158	6	62414099	62414203	+	0	0	0	0	0	0	0	0	0	0	0	0	0	0	0	0	0	0	0	0	0	0	0	0	0	0	0	0	0	0
snRNA	ENSMMUG00000034792	6	62669884	62670022	-	0	0	0	0	0	0	0	0	0	0	0	0	0	0	0	0	0	0	0	0	0	0	0	0	0	0	0	0	0	0
snRNA	ENSMMUG00000026644	6	63480834	63480934	-	0	0	0	0	0	0	0	0	0	0	0	0	0	0	0	0	0	0	0	0	0	0	0	0	0	0	0	0	0	0
snoRNA	ENSMMUG00000036111	6	63858268	63858402	-	0	0	0	0	0	0	0	0	0	0	0	0	0	0	0	0	0	0	0	0	0	0	0	0	0	0	0	0	0	0
snoRNA	ENSMMUG00000035493	6	64145973	64146074	-	0	0	0	0	0	0	0	0	0	0	0	0	0	0	0	0	0	0	0	0	0	0	0	0	0	0	0	0	0	0
snoRNA	ENSMMUG00000036448	6	64266596	64266667	+	0	0	0	0	0	0	0	0	0	0	0	0	0	0	0	0	0	0	0	0	0	0	0	0	0	0	0	0	0	0
snRNA	ENSMMUG00000027903	6	66014829	66014935	-	0	0	0	0	0	0	0	0	0	0	0	0	0	0	0	0	0	0	0	0	0	0	0	0	0	0	0	0	0	0
snoRNA	ENSMMUG00000032958	6	66728347	66728479	+	0	0	0	0	0	0	0	0	0	0	0	0	0	0	0	0	0	0	0	0	0	0	0	0	0	0	0	0	0	0
snoRNA	ENSMMUG00000035580	6	67018356	67018486	+	0	0	0	0	0	0	0	0	0	0	0	0	0	0	0	0	0	0	0	0	0	0	0	0	0	0	0	0	0	0
snoRNA	ENSMMUG00000036551	6	67034378	67034479	-	0	0	0	0	0	0	0	0	0	0	0	0	0	0	0	0	0	0	0	0	0	0	0	0	0	0	0	0	0	0
snRNA	ENSMMUG00000025859	6	67406303	67406405	-	0	0	0	0	0	0	0	0	0	0	0	0	0	0	0	0	0	0	0	0	0	0	0	0	0	0	0	0	0	0
snoRNA	ENSMMUG00000035874	6	67414746	67414849	-	0	0	0	0	0	0	0	0	0	0	0	0	0	0	0	0	0	0	0	0	0	0	0	0	0	0	0	0	0	0
snoRNA	ENSMMUG00000036591	6	67581753	67581835	-	0	0	0	0	0	0	0	0	0	0	0	0	0	0	0	0	0	0	0	0	0	0	0	0	0	0	0	0	0	0
snRNA	ENSMMUG00000036599	6	67630511	67630595	-	0	0	0	0	0	0	0	0	0	0	0	0	0	0	0	0	0	0	0	0	0	0	0	0	0	0	0	0	0	0
snRNA	ENSMMUG00000037201	6	70020726	70020787	-	0	0	0	0	0	0	0	0	0	0	0	0	0	0	0	0	0	0	0	0	0	0	0	0	0	0	0	0	0	0
snRNA	ENSMMUG00000037135	6	70909838	70909940	-	0	0	0	0	0	0	0	0	0	0	0	0	0	0	0	0	0	0	0	0	0	0	0	0	0	0	0	0	0	0
snRNA	ENSMMUG00000026346	6	70966843	70966946	+	0	0	0	0	0	0	0	0	0	0	0	0	0	0	0	0	0	0	0	0	0	0	0	0	0	0	0	0	0	0
snRNA	ENSMMUG00000035540	6	71737938	71737998	-	0	0	0	0	0	0	0	0	0	0	0	0	0	0	0	0	0	0	0	0	0	0	0	0	0	0	0	0	0	0
snRNA	ENSMMUG00000023971	6	71904339	71904442	-	0	0	0	0	0	0	0	0	0	0	0	0	0	0	0	0	0	0	0	0	0	0	0	0	0	0	0	0	0	0
snoRNA	ENSMMUG00000036708	6	72352099	72352165	-	0	0	0	0	0	0	0	0	0	0	0	0	0	0	0	0	0	0	0	0	0	0	0	0	0	0	0	0	0	0
snoRNA	ENSMMUG00000036291	6	72946217	72946320	+	0	0	0	0	0	0	0	0	0	0	0	0	0	0	0	0	0	0	0	0	0	0	0	0	0	0	0	0	0	0
snRNA	ENSMMUG00000037139	6	73095113	73095156	+	0	0	0	0	0	0	0	0	0	0	0	0	0	0	0	0	0	0	0	0	0	0	0	0	0	0	0	0	0	0
snoRNA	ENSMMUG00000036603	6	73218794	73218931	-	0	0	0	0	0	0	0	0	0	0	0	0	0	0	0	0	0	0	0	0	0	0	0	0	0	0	0	0	0	0
snRNA	ENSMMUG00000024624	6	74547600	74547709	-	0	0	0	0	0	0	0	0	0	0	0	0	0	0	0	0	0	0	0	0	0	0	0	0	0	0	0	0	0	0
snoRNA	ENSMMUG00000025788	6	75444251	75444382	+	0	0	0	0	0	0	0	0	0	0	0	0	0	0	0	0	0	0	0	0	0	0	0	0	0	0	0	0	0	0
snRNA	ENSMMUG00000034625	6	75716022	75716123	+	0	0	0	0	0	0	0	0	0	0	0	0	0	0	0	0	0	0	0	0	0	0	0	0	0	0	0	0	0	0
snoRNA	ENSMMUG00000036658	6	76445578	76445681	-	0	0	0	0	0	0	0	0	0	0	0	0	0	0	0	0	0	0	0	0	0	0	0	0	0	0	0	0	0	0
snoRNA	ENSMMUG00000037188	6	76505424	76505541	-	0	0	0	0	0	0	0	0	0	0	0	0	0	0	0	0	0	0	0	0	0	0	0	0	0	0	0	0	0	0
snRNA	ENSMMUG00000028301	6	76573648	76573752	-	0	0	0	0	0	0	0	0	0	0	0	0	0	0	0	0	0	0	0	0	0	0	0	0	0	0	0	0	0	0
snRNA	ENSMMUG00000036820	6	76612257	76612316	-	0	0	0	0	0	0	0	0	0	0	0	0	0	0	0	0	0	0	0	0	0	0	0	0	0	0	0	0	0	0
snoRNA	ENSMMUG00000035653	6	79235227	79235361	-	0	0	0	0	0	0	0	0	0	0	0	0	0	0	0	0	0	0	0	0	0	0	0	0	0	0	0	0	0	0
snRNA	ENSMMUG00000033224	6	79890960	79891055	+	0	0	0	0	0	0	0	0	0	0	0	0	0	0	0	0	0	0	0	0	0	0	0	0	0	0	0	0	0	0
snRNA	ENSMMUG00000025736	6	79991393	79991524	+	0	0	0	0	0	0	0	0	0	0	0	0	0	0	0	0	0	0	0	0	0	0	0	0	0	0	0	0	0	0
snRNA	ENSMMUG00000037398	6	80402009	80402115	+	0	0	0	0	0	0	0	0	0	0	0	0	0	0	0	0	0	0	0	0	0	0	0	0	0	0	0	0	0	0
snoRNA	ENSMMUG00000025419	6	82845974	82846036	+	0	0	0	0	0	0	0	0	0	0	0	0	0	0	0	0	0	0	0	0	0	0	0	0	0	0	0	0	0	0
snRNA	ENSMMUG00000028440	6	82889840	82889945	-	0	0	0	0	0	0	0	0	0	0	0	0	0	0	0	0	0	0	0	0	0	0	0	0	0	0	0	0	0	0
snRNA	ENSMMUG00000025010	6	83548456	83548566	-	0	0	0	0	0	0	0	0	0	0	0	0	0	0	0	0	0	0	0	0	0	0	0	0	0	0	0	0	0	0
snRNA	ENSMMUG00000027436	6	83667596	83667702	-	0	0	0	0	0	0	0	0	0	0	0	0	0	0	0	0	0	0	0	0	0	0	0	0	0	0	0	0	0	0
snoRNA	ENSMMUG00000023909	6	84666474	84666609	+	0	0	0	0	0	0	0	0	0	0	0	0	0	0	0	0	0	0	0	0	0	0	0	0	0	0	0	0	0	0
snRNA	ENSMMUG00000035935	6	85357054	85357151	-	0	0	0	0	0	0	0	0	0	0	0	0	0	0	0	0	0	0	0	0	0	0	0	0	0	0	0	0	0	0
snRNA	ENSMMUG00000025376	6	87508568	87508708	+	0	0	0	0	0	0	0	0	0	0	0	0	0	0	0	0	0	0	0	0	0	0	0	0	0	0	0	0	0	0
snRNA	ENSMMUG00000028030	6	88323901	88324007	-	0	0	0	0	0	0	0	0	0	0	0	0	0	0	0	0	0	0	0	0	0	0	0	0	0	0	0	0	0	0
snRNA	ENSMMUG00000033218	6	91745583	91745689	+	0	0	0	0	0	0	0	0	0	0	0	0	0	0	0	0	0	0	0	0	0	0	0	0	0	0	0	0	0	0
snRNA	ENSMMUG00000028128	6	92411916	92412019	-	0	0	0	0	0	0	0	0	0	0	0	0	0	0	0	0	0	0	0	0	0	0	0	0	0	0	0	0	0	0
snRNA	ENSMMUG00000024885	6	93388348	93388509	-	0	0	0	0	0	0	0	0	0	0	0	0	0	0	0	0	0	0	0	0	0	0	0	0	0	0	0	0	0	0
snRNA	ENSMMUG00000025021	6	95140321	95140423	+	0	0	0	0	0	0	0	0	0	0	0	0	0	0	0	0	0	0	0	0	0	0	0	0	0	0	0	0	0	0
snRNA	ENSMMUG00000026310	6	95908441	95908547	-	0	0	0	0	0	0	0	0	0	0	0	0	0	0	0	0	0	0	0	0	0	0	0	0	0	0	0	0	0	0
snRNA	ENSMMUG00000026694	6	100336356	100336517	+	0	0	0	0	0	0	0	0	0	0	0	0	0	0	0	0	0	0	0	0	0	0	0	0	0	0	0	0	0	0
snRNA	ENSMMUG00000032929	6	101024816	101024917	-	0	0	0	0	0	0	0	0	0	0	0	0	0	0	0	0	0	0	0	0	0	0	0	0	0	0	0	0	0	0
snoRNA	ENSMMUG00000035813	6	102843987	102844122	+	0	0	0	0	0	0	0	0	0	0	0	0	0	0	0	0	0	0	0	0	0	0	0	0	0	0	0	0	0	0
tRNA	tRNA-His-GTG-4-1	6	106923855	106923925	-	0	0	0	0	0	0	0	0	0	0	0	0	0	0	0	0	0	0	0	0	0	0	0	0	0	0	0	0	0	0
snoRNA	ENSMMUG00000026141	6	106993006	106993138	-	0	0	0	0	0	0	0	0	0	0	0	0	0	0	0	0	0	0	0	0	0	0	0	0	0	0	0	0	0	0
snoRNA	ENSMMUG00000025857	6	108432435	108432567	+	0	1	0	0	0	0	1	1	0	1	1	1	0	1	0	0	1	0	1	0	1	0	0	0	0	1	0	0	0	0
snRNA	ENSMMUG00000025931	6	109093909	109094015	+	0	0	0	0	0	0	0	0	0	0	0	0	0	0	0	0	0	0	0	0	0	0	0	0	0	0	0	0	0	0
snRNA	ENSMMUG00000036596	6	109813749	109813873	+	0	0	0	0	0	0	0	0	0	0	0	0	0	0	0	0	0	0	0	0	0	0	0	0	0	0	0	0	0	0
snRNA	ENSMMUG00000034485	6	112180830	112181016	-	0	0	0	0	0	0	0	0	0	0	0	0	0	0	0	0	0	0	0	0	0	0	0	0	0	0	0	0	0	0
snRNA	ENSMMUG00000037127	6	112676576	112676673	-	0	0	0	0	0	0	0	0	0	0	0	0	0	0	0	0	0	0	0	0	0	0	0	0	0	0	0	0	0	0
snRNA	ENSMMUG00000036061	6	115274947	115275010	+	0	0	0	0	0	0	0	0	0	0	0	0	0	0	0	0	0	0	0	0	0	0	0	0	0	0	0	0	0	0
snoRNA	ENSMMUG00000035884	6	115616158	115616256	-	0	0	0	0	0	0	0	0	0	0	0	0	0	0	0	0	0	0	0	0	0	0	0	0	0	0	0	0	0	0
snRNA	ENSMMUG00000024002	6	115682910	115683017	+	0	0	0	0	0	0	0	0	0	0	0	0	0	0	0	0	0	0	0	0	0	0	0	0	0	0	0	0	0	0
snoRNA	ENSMMUG00000035498	6	115997462	115997563	-	0	0	0	0	0	0	0	0	0	0	0	0	0	0	0	0	0	0	0	0	0	0	0	0	0	0	0	0	0	0
snoRNA	ENSMMUG00000035955	6	116126800	116126903	-	0	0	0	0	0	0	0	0	0	0	0	0	0	0	0	0	0	0	0	0	0	0	0	0	0	0	0	0	0	0
snRNA	ENSMMUG00000035731	6	116823744	116823848	-	0	0	0	0	0	0	0	0	0	0	0	0	0	0	0	0	0	0	0	0	0	0	0	0	0	0	0	0	0	0
snRNA	ENSMMUG00000035303	6	117188254	117188397	-	0	0	0	0	0	0	0	0	0	0	0	0	0	0	0	0	0	0	0	0	0	0	0	0	0	0	0	0	0	0
snoRNA	ENSMMUG00000036045	6	119187777	119187869	+	0	0	0	0	0	0	0	0	0	0	0	0	0	0	0	0	0	0	0	0	0	0	0	0	0	0	0	0	0	0
snRNA	ENSMMUG00000026742	6	122946292	122946398	-	0	0	0	0	0	0	0	0	0	0	0	0	0	0	0	0	0	0	0	0	0	0	0	0	0	0	0	0	0	0
snRNA	ENSMMUG00000026368	6	123149038	123149139	-	0	0	0	0	0	0	0	0	0	0	0	0	0	0	0	0	0	0	0	0	0	0	0	0	0	0	0	0	0	0
snRNA	ENSMMUG00000028503	6	123735473	123735579	+	0	0	0	0	0	0	0	0	0	0	0	0	0	0	0	0	0	0	0	0	0	0	0	0	0	0	0	0	0	0
snoRNA	ENSMMUG00000035454	6	123877274	123877377	+	0	0	0	0	0	0	0	0	0	0	0	0	0	0	0	0	0	0	0	0	0	0	0	0	0	0	0	0	0	0
snRNA	ENSMMUG00000035515	6	126825914	126825975	-	0	0	0	0	0	0	0	0	0	0	0	0	0	0	0	0	0	0	0	0	0	0	0	0	0	0	0	0	0	0
snRNA	ENSMMUG00000036709	6	129247696	129247755	-	0	0	0	0	0	0	0	0	0	0	0	0	0	0	0	0	0	0	0	0	0	0	0	0	0	0	0	0	0	0
snoRNA	ENSMMUG00000035569	6	130255682	130255782	-	0	0	0	0	0	0	0	0	0	0	0	0	0	0	0	0	0	0	0	0	0	0	0	0	0	0	0	0	0	0
snoRNA	ENSMMUG00000026756	6	130674374	130674504	+	0	0	0	0	0	0	0	0	0	0	0	0	0	0	0	0	0	0	0	0	0	0	0	0	0	0	0	0	0	0
snRNA	ENSMMUG00000037375	6	131002014	131002074	-	0	0	0	0	0	0	0	0	0	0	0	0	0	0	0	0	0	0	0	0	0	0	0	0	0	0	0	0	0	0
snRNA	ENSMMUG00000028242	6	131064701	131064802	-	0	0	0	0	0	0	0	0	0	0	0	0	0	0	0	0	0	0	0	0	0	0	0	0	0	0	0	0	0	0
snRNA	ENSMMUG00000037217	6	131090894	131090953	-	0	0	0	0	0	0	0	0	0	0	0	0	0	0	0	0	0	0	0	0	0	0	0	0	0	0	0	0	0	0
snRNA	ENSMMUG00000035409	6	131148601	131148700	+	0	0	0	0	0	0	0	0	0	0	0	0	0	0	0	0	0	0	0	0	0	0	0	0	0	0	0	0	0	0
snRNA	ENSMMUG00000035952	6	134470237	134470339	-	0	0	0	0	0	0	0	0	0	0	0	0	0	0	0	0	0	0	0	0	0	0	0	0	0	0	0	0	0	0
snoRNA	ENSMMUG00000036320	6	134517398	134517500	-	0	0	0	0	0	0	0	0	0	0	0	0	0	0	0	0	0	0	0	0	0	0	0	0	0	0	0	0	0	0
snRNA	ENSMMUG00000024115	6	134519784	134519890	+	0	0	0	0	0	0	0	0	0	0	0	0	0	0	0	0	0	0	0	0	0	0	0	0	0	0	0	0	0	0
snoRNA	ENSMMUG00000035047	6	134978091	134978160	-	0	0	0	0	0	0	0	0	1	1	0	0	0	0	0	0	0	0	1	0	1	0	0	0	0	0	0	0	0	0
snoRNA	ENSMMUG00000024424	6	134980173	134980242	-	3	4	6	3	4	3	8	3	7	5	3	10	4	1	2	4	4	2	9	8	29	0	12	5	3	6	3	8	6	5
snoRNA	ENSMMUG00000036705	6	135044261	135044364	+	0	0	0	0	0	0	0	0	0	0	0	0	0	0	0	0	0	0	0	0	0	0	0	0	0	0	0	0	0	0
snRNA	ENSMMUG00000027745	6	135635297	135635393	+	0	0	0	0	0	0	0	0	0	0	0	0	0	0	0	0	0	0	0	0	0	0	0	0	0	0	0	0	0	0
snoRNA	ENSMMUG00000036278	6	135687466	135687670	+	0	0	0	0	0	0	0	0	0	0	0	0	0	0	0	0	0	0	0	0	0	0	0	0	0	0	0	0	0	0
snoRNA	ENSMMUG00000024450	6	135690116	135690316	+	1	1	2	0	0	1	2	1	1	1	1	2	2	1	1	1	1	1	1	1	2	0	1	0	1	2	1	1	2	0
snRNA	ENSMMUG00000028175	6	135873328	135873443	+	0	0	0	0	0	0	0	0	0	0	0	0	0	0	0	0	0	0	0	0	0	0	0	0	0	0	0	0	0	0
snRNA	ENSMMUG00000034154	6	136820748	136820871	-	0	0	0	0	0	0	0	0	0	0	0	0	0	0	0	0	0	0	0	0	0	0	0	0	0	0	0	0	0	0
snoRNA	ENSMMUG00000025635	6	136941659	136941735	-	0	0	0	0	0	0	0	0	0	0	0	0	0	0	0	0	0	0	0	0	0	0	0	0	0	0	0	0	0	0
snoRNA	ENSMMUG00000024537	6	136995477	136995602	+	0	0	0	0	0	0	0	0	0	0	0	0	0	0	0	0	0	0	0	0	0	0	0	0	0	0	0	0	0	0
snoRNA	ENSMMUG00000025308	6	139056757	139056836	-	0	0	0	0	0	0	0	0	0	0	0	0	0	0	0	0	0	0	0	0	0	0	0	0	0	0	0	0	0	0
snRNA	ENSMMUG00000035921	6	139975827	139975896	-	0	0	0	0	0	0	0	0	0	0	0	0	0	0	0	0	0	0	0	0	0	0	0	0	0	0	0	0	0	0
snRNA	ENSMMUG00000024135	6	145577200	145577306	-	0	0	0	0	0	0	0	0	0	0	0	0	0	0	0	0	0	0	0	0	0	0	0	0	0	0	0	0	0	0
snRNA	ENSMMUG00000036593	6	146085804	146085908	-	0	0	0	0	0	0	0	0	0	0	0	0	0	0	0	0	0	0	0	0	0	0	0	0	0	0	0	0	0	0
snoRNA	ENSMMUG00000024350	6	146170905	146171118	-	0	0	0	0	0	0	0	0	0	0	0	0	0	0	0	0	0	0	0	0	0	0	0	0	0	0	0	0	0	0
snoRNA	ENSMMUG00000037407	6	147015577	147015676	-	0	0	0	0	0	0	0	0	0	0	0	0	0	0	0	0	0	0	0	0	0	0	0	0	0	0	0	0	0	0
snoRNA	ENSMMUG00000033632	6	147343921	147344045	+	0	0	0	0	0	0	0	0	0	0	0	0	0	0	0	0	0	0	0	0	0	0	0	0	0	0	0	0	0	0
tRNA	chr6.trna2-Undet???	6	150643874	150644059	+	0	0	0	0	0	0	0	0	0	0	0	0	0	0	0	0	0	0	0	0	0	0	0	0	0	0	0	0	0	0
snRNA	ENSMMUG00000028302	6	153188676	153188780	+	0	0	0	0	0	0	0	0	0	0	0	0	0	0	0	0	0	0	0	0	0	0	0	0	0	0	0	0	0	0
snRNA	ENSMMUG00000036379	6	153951609	153951716	+	0	0	0	0	0	0	0	0	0	0	0	0	0	0	0	0	0	0	0	0	0	0	0	0	0	0	0	0	0	0
snRNA	ENSMMUG00000027336	6	154229956	154230062	+	0	0	0	0	0	0	0	0	0	0	0	0	0	0	0	0	0	0	0	0	0	0	0	0	0	0	0	0	0	0
snRNA	ENSMMUG00000035086	6	154379469	154379658	-	0	0	0	0	0	0	0	0	0	0	0	0	0	0	0	0	0	0	0	0	0	0	0	0	0	0	0	0	0	0
snoRNA	ENSMMUG00000036338	6	155643190	155643316	+	0	0	0	0	0	0	0	0	0	0	0	0	0	0	0	0	0	0	0	0	0	0	0	0	0	0	0	0	0	0
snRNA	ENSMMUG00000036545	6	155732148	155732273	+	0	0	0	0	0	0	0	0	0	0	0	0	0	0	0	0	0	0	0	0	0	0	0	0	0	0	0	0	0	0
snRNA	ENSMMUG00000034341	6	156458231	156458332	+	0	0	0	0	0	0	0	0	0	0	0	0	0	0	0	0	0	0	0	0	0	0	0	0	0	0	0	0	0	0
snRNA	ENSMMUG00000035744	6	160135242	160135342	-	0	0	0	0	0	0	0	0	0	0	0	0	0	0	0	0	0	0	0	0	0	0	0	0	0	0	0	0	0	0
snRNA	ENSMMUG00000027421	6	161288034	161288139	-	0	0	0	0	0	0	0	0	0	0	0	0	0	0	0	0	0	0	0	0	0	0	0	0	0	0	0	0	0	0
snoRNA	ENSMMUG00000037402	6	164390203	164390317	-	0	0	0	0	0	0	0	0	0	0	0	0	0	0	0	0	0	0	0	0	0	0	0	0	0	0	0	0	0	0
snRNA	ENSMMUG00000024171	6	165943936	165944042	+	0	0	0	0	0	0	0	0	0	0	0	0	0	0	0	0	0	0	0	0	0	0	0	0	0	0	0	0	0	0
snoRNA	ENSMMUG00000036606	6	167668505	167668560	+	0	0	0	0	0	0	0	0	0	0	0	0	0	0	0	0	0	0	0	0	0	0	0	0	0	0	0	0	0	0
snoRNA	ENSMMUG00000027925	6	167747179	167747313	+	0	0	0	0	0	0	0	0	0	0	0	0	0	0	0	0	0	0	0	0	0	0	0	0	0	0	0	0	0	0
snoRNA	ENSMMUG00000033319	6	168638246	168638390	-	0	0	0	0	0	0	0	0	0	0	0	0	0	0	0	0	0	0	0	0	0	0	0	0	0	0	0	0	0	0
snoRNA	ENSMMUG00000032878	6	169419785	169419985	+	0	1	0	0	0	1	1	1	1	1	0	1	1	1	1	2	0	0	1	0	2	0	2	0	1	1	0	0	1	1
snRNA	ENSMMUG00000025071	6	169771524	169771630	-	0	0	0	0	0	0	0	0	0	0	0	0	0	0	0	0	0	0	0	0	0	0	0	0	0	0	0	0	0	0
snoRNA	ENSMMUG00000036378	6	171887653	171887755	-	0	0	0	0	0	0	0	0	0	0	0	0	0	0	0	0	0	0	0	0	0	0	0	0	0	0	0	0	0	0
snRNA	ENSMMUG00000035459	6	172143223	172143329	+	0	0	0	0	0	0	0	0	0	0	0	0	0	0	0	0	0	0	0	0	0	0	0	0	0	0	0	0	0	0
snRNA	ENSMMUG00000028010	6	175500005	175500168	+	0	0	0	0	0	0	0	0	0	0	0	0	0	0	0	0	0	0	0	0	0	0	0	0	0	0	0	0	0	0
snRNA	ENSMMUG00000024740	6	177141365	177141468	+	0	0	0	0	0	0	0	0	0	0	0	0	0	0	0	0	0	0	0	0	0	0	0	0	0	0	0	0	0	0
snRNA	ENSMMUG00000028216	6	177675909	177676012	+	0	0	0	0	0	0	0	0	0	0	0	0	0	0	0	0	0	0	0	0	0	0	0	0	0	0	0	0	0	0
snoRNA	ENSMMUG00000032960	6	177926771	177926849	-	0	0	0	0	0	0	0	0	0	0	0	0	0	0	0	0	1	0	0	0	0	0	0	0	0	0	0	0	0	0
snoRNA	ENSMMUG00000026456	6	177928282	177928349	-	19	52	62	9	20	31	31	20	26	33	29	32	13	22	10	14	19	17	59	14	111	10	51	15	22	24	36	21	44	23
snRNA	ENSMMUG00000034468	6	178151707	178151809	-	0	0	0	0	0	0	0	0	0	0	0	0	0	0	0	0	0	0	0	0	0	0	0	0	0	0	0	0	0	0
tRNA	tRNA-Val-CAC-1-4	6	180080555	180080628	+	0	0	0	0	0	0	0	0	0	0	0	0	0	0	0	0	0	0	0	0	0	0	0	0	0	0	0	0	0	0
tRNA	tRNA-Leu-AAG-5-1	6	180080971	180081053	-	0	0	0	0	0	0	0	0	0	0	0	0	0	0	0	0	0	0	0	0	0	0	0	0	0	0	0	0	0	0
tRNA	tRNA-Leu-AAG-6-1	6	180086836	180086918	+	0	0	0	0	0	0	0	0	0	0	0	0	0	0	0	0	0	0	0	0	0	0	0	0	0	0	0	0	0	0
tRNA	tRNA-Val-CAC-1-5	6	180087237	180087310	-	0	0	0	0	0	0	0	0	0	0	0	0	0	0	0	0	0	0	0	0	0	0	0	0	0	0	0	0	0	0
tRNA	tRNA-Val-CAC-3-1	6	180135335	180135408	+	0	0	0	0	0	0	0	0	0	0	0	0	0	0	0	0	0	0	0	0	0	0	0	0	0	0	0	0	0	0
tRNA	tRNA-Leu-AAG-1-1	6	180135748	180135830	-	0	0	0	0	0	0	0	0	0	0	0	0	0	0	0	0	0	0	0	0	0	0	0	0	0	0	0	0	0	0
tRNA	tRNA-Leu-AAG-4-2	6	180154119	180154201	+	0	0	0	0	0	0	0	0	0	0	0	0	0	0	0	0	0	0	0	0	0	0	0	0	0	0	0	0	0	0
tRNA	tRNA-Val-AAC-5-1	6	180154854	180154927	-	0	0	0	0	0	0	0	0	0	0	0	0	0	0	0	0	0	0	0	0	0	0	0	0	0	0	0	0	0	0
tRNA	tRNA-Pro-TGG-3-1	6	180155285	180155357	-	0	0	0	0	0	0	0	0	0	0	0	0	0	0	0	0	0	0	0	0	0	0	0	0	0	0	0	0	0	0
tRNA	tRNA-Ile-TAT-3-1	6	180158029	180158102	-	0	0	0	0	0	0	0	0	0	0	0	0	0	0	0	0	0	0	0	0	0	0	0	0	0	0	0	0	0	0
tRNA	tRNA-Ala-TGC-7-1	6	180172467	180172539	+	0	0	0	0	0	0	0	0	0	0	0	0	0	0	0	0	0	0	0	0	0	0	0	0	0	0	0	0	0	0
tRNA	tRNA-Lys-CTT-1-3	6	180173293	180173366	+	0	0	0	0	0	0	0	0	0	0	0	0	0	0	0	0	0	0	0	0	0	0	0	0	0	0	0	0	0	0
tRNA	tRNA-Lys-CTT-1-4	6	180187481	180187554	-	0	0	0	0	0	0	0	0	0	0	0	0	0	0	0	0	0	0	0	0	0	0	0	0	0	0	0	0	0	0
tRNA	tRNA-Val-AAC-4-3	6	180187903	180187976	-	0	0	0	0	0	0	0	0	0	0	0	0	0	0	0	0	0	0	0	0	0	0	0	0	0	0	0	0	0	0
snRNA	ENSMMUG00000033006	7	3010748	3010854	-	0	0	0	0	0	0	0	0	0	0	0	0	0	0	0	0	0	0	0	0	0	0	0	0	0	0	0	0	0	0
snoRNA	ENSMMUG00000036443	7	3808914	3809015	+	0	0	0	0	0	0	0	0	0	0	0	0	0	0	0	0	0	0	0	0	0	0	0	0	0	0	0	0	0	0
tRNA	tRNA-Glu-TTC-1-1	7	3826542	3826614	-	0	0	0	0	0	0	0	0	0	0	0	0	0	0	0	0	0	0	0	0	0	0	0	0	0	0	0	0	0	0
snoRNA	ENSMMUG00000036590	7	3891667	3891741	+	1	1	2	1	1	1	3	1	3	3	1	6	1	0	1	1	2	1	2	1	10	0	2	1	1	1	2	2	2	1
snoRNA	ENSMMUG00000032720	7	3894765	3894831	+	0	0	0	0	0	0	0	0	1	0	0	0	0	0	0	0	0	0	0	0	2	0	1	0	0	0	0	0	0	0
snoRNA	ENSMMUG00000036546	7	3896593	3896663	+	0	0	0	0	0	0	0	0	0	0	0	0	0	0	0	0	0	0	0	0	0	0	0	0	0	0	0	0	0	0
snoRNA	ENSMMUG00000036892	7	3948962	3949028	+	0	0	0	0	0	0	0	0	0	0	0	0	0	0	0	0	0	0	0	0	0	0	0	0	0	0	0	0	0	0
snoRNA	ENSMMUG00000028377	7	3955359	3955453	+	0	0	0	0	0	0	0	0	0	0	0	0	0	0	0	0	0	0	0	0	0	0	0	0	0	0	0	0	0	0
snoRNA	ENSMMUG00000028533	7	3958043	3958137	+	0	0	0	0	0	0	0	0	0	0	0	0	0	0	0	0	0	0	0	0	0	0	0	0	0	0	0	0	0	0
snoRNA	ENSMMUG00000028316	7	3960705	3960799	+	0	0	0	0	0	0	0	0	0	0	0	0	0	0	0	0	0	0	0	0	0	0	0	0	0	0	0	0	0	0
snoRNA	ENSMMUG00000027498	7	3963280	3963374	+	0	0	0	0	0	0	0	0	0	0	0	0	0	0	0	0	0	0	0	0	0	0	0	0	0	0	0	0	0	0
snoRNA	ENSMMUG00000027638	7	3966042	3966136	+	0	0	0	0	0	0	0	0	0	0	0	0	0	0	0	0	0	0	0	0	0	0	0	0	0	0	0	0	0	0
snoRNA	ENSMMUG00000027364	7	3968748	3968842	+	0	0	0	0	0	0	0	0	0	0	0	0	0	0	0	0	0	0	0	0	0	0	0	0	0	0	0	0	0	0
snoRNA	ENSMMUG00000027580	7	3971466	3971560	+	0	0	0	0	0	0	0	0	0	0	0	0	0	0	0	0	0	0	0	0	0	0	0	0	0	0	0	0	0	0
snoRNA	ENSMMUG00000027519	7	3974079	3974173	+	0	0	0	0	0	0	0	0	0	0	0	0	0	0	0	0	0	0	0	0	0	0	0	0	0	0	0	0	0	0
snoRNA	ENSMMUG00000028484	7	3976769	3976863	+	0	0	0	0	0	0	0	0	0	0	0	0	0	0	0	0	0	0	0	0	0	0	0	0	0	0	0	0	0	0
snoRNA	ENSMMUG00000027616	7	3979387	3979478	+	0	0	0	0	0	0	0	0	0	0	0	0	0	0	0	0	0	0	0	0	0	0	0	0	0	0	0	0	0	0
snoRNA	ENSMMUG00000026582	7	3980496	3980585	+	0	0	0	0	0	0	0	0	0	0	0	0	0	0	0	0	0	0	0	0	0	0	0	0	0	0	0	0	0	0
snoRNA	ENSMMUG00000025340	7	3982491	3982586	+	0	0	0	0	0	0	0	0	0	0	0	0	0	0	0	0	0	0	0	0	0	0	0	0	0	0	0	0	0	0
snoRNA	ENSMMUG00000025597	7	3983601	3983692	+	0	0	0	0	0	0	0	0	0	0	0	0	0	0	0	0	0	0	0	0	0	0	0	0	0	0	0	0	0	0
snoRNA	ENSMMUG00000025183	7	3984749	3984840	+	0	0	0	0	0	0	0	0	0	0	0	0	0	0	0	0	0	0	0	0	0	0	0	0	0	0	0	0	0	0
snoRNA	ENSMMUG00000027483	7	3986947	3987038	+	0	0	0	0	0	0	0	0	0	0	0	0	0	0	0	0	0	0	0	0	0	0	0	0	0	0	0	0	0	0
snoRNA	ENSMMUG00000024463	7	3987767	3987858	+	0	0	0	0	0	0	0	0	0	0	0	0	0	0	0	0	0	0	0	0	0	0	0	0	0	0	0	0	0	0
snoRNA	ENSMMUG00000027817	7	3989548	3989639	+	0	0	0	0	0	0	0	0	0	0	0	0	0	0	0	0	0	0	0	0	0	0	0	0	0	0	0	0	0	0
snoRNA	ENSMMUG00000026223	7	3992638	3992729	+	0	0	0	0	0	0	0	0	0	0	0	0	0	0	0	0	0	0	0	0	0	0	0	0	0	0	0	0	0	0
snoRNA	ENSMMUG00000025613	7	3993749	3993840	+	0	0	0	0	0	0	0	0	0	0	0	0	0	0	0	0	0	0	0	0	0	0	0	0	0	0	0	0	0	0
snoRNA	ENSMMUG00000025959	7	3995263	3995354	+	0	0	0	0	0	0	0	0	0	0	0	0	0	0	0	0	0	0	0	0	0	0	0	0	0	0	0	0	0	0
snoRNA	ENSMMUG00000024990	7	3996393	3996484	+	0	0	0	0	0	0	0	0	0	0	0	0	0	0	0	0	0	0	0	0	0	0	0	0	0	0	0	0	0	0
snoRNA	ENSMMUG00000027546	7	3999058	3999126	+	0	0	0	0	0	0	0	0	0	0	0	0	0	0	0	0	0	0	0	0	0	0	0	0	0	0	0	0	0	0
snoRNA	ENSMMUG00000024746	7	4000182	4000273	+	0	0	0	0	0	0	0	0	0	0	0	0	0	0	0	0	0	0	0	0	0	0	0	0	0	0	0	0	0	0
snoRNA	ENSMMUG00000028119	7	4001311	4001402	+	0	0	0	0	0	0	0	0	0	0	0	0	0	0	0	0	0	0	0	0	0	0	0	0	0	0	0	0	0	0
snoRNA	ENSMMUG00000028483	7	4003171	4003262	+	0	0	0	0	0	0	0	0	0	0	0	0	0	0	0	0	0	0	0	0	0	0	0	0	0	0	0	0	0	0
snoRNA	ENSMMUG00000026017	7	4005416	4005507	+	0	0	0	0	0	0	0	0	0	0	0	0	0	0	0	0	0	0	0	0	0	0	0	0	0	0	0	0	0	0
snoRNA	ENSMMUG00000036079	7	4008922	4009013	+	0	0	0	0	0	0	0	0	0	0	0	0	0	0	0	0	0	0	0	0	0	0	0	0	0	0	0	0	0	0
snoRNA	ENSMMUG00000035508	7	4011031	4011125	+	0	0	0	0	0	0	0	0	0	0	0	0	0	0	0	0	0	0	0	0	0	0	0	0	0	0	0	0	0	0
snoRNA	ENSMMUG00000035630	7	4013081	4013172	+	0	0	0	0	0	0	0	0	0	0	0	0	0	0	0	0	0	0	0	0	0	0	0	0	0	0	0	0	0	0
snoRNA	ENSMMUG00000036802	7	4016104	4016180	+	0	0	0	0	0	0	0	0	0	0	0	0	0	0	0	0	0	0	0	0	0	0	0	0	0	0	0	0	0	0
snoRNA	ENSMMUG00000037143	7	4017993	4018075	+	0	0	0	0	0	0	0	0	0	0	0	0	0	0	0	0	0	0	0	0	0	0	0	0	0	0	0	0	0	0
snoRNA	ENSMMUG00000033293	7	4071014	4071072	+	0	0	0	0	0	0	0	0	0	0	0	0	0	0	0	0	0	0	0	0	0	0	0	0	0	0	0	0	0	0
snoRNA	ENSMMUG00000028028	7	4081145	4081226	+	0	0	0	0	0	0	0	0	0	0	0	0	0	0	0	0	0	0	0	0	0	0	0	0	0	0	0	0	0	0
snoRNA	ENSMMUG00000028081	7	4083031	4083112	+	0	0	0	0	0	0	0	0	0	0	0	0	0	0	0	0	0	0	0	0	0	0	0	0	0	0	0	0	0	0
snoRNA	ENSMMUG00000027764	7	4084343	4084424	+	0	0	0	0	0	0	0	0	0	0	0	0	0	0	0	0	0	0	0	0	0	0	0	0	0	0	0	0	0	0
snoRNA	ENSMMUG00000028141	7	4086259	4086340	+	0	0	0	0	0	0	0	0	0	0	0	0	0	0	0	0	0	0	0	0	0	0	0	0	0	0	0	0	0	0
snoRNA	ENSMMUG00000028062	7	4088153	4088234	+	0	0	0	0	0	0	0	0	0	0	0	0	0	0	0	0	0	0	0	0	0	0	0	0	0	0	0	0	0	0
snoRNA	ENSMMUG00000027704	7	4090020	4090101	+	0	0	0	0	0	0	0	0	0	0	0	0	0	0	0	0	0	0	0	0	0	0	0	0	0	0	0	0	0	0
snoRNA	ENSMMUG00000028215	7	4091925	4092005	+	0	0	0	0	0	0	0	0	0	0	0	0	0	0	0	0	0	0	0	0	0	0	0	0	0	0	0	0	0	0
snoRNA	ENSMMUG00000027326	7	4095417	4095498	+	0	0	0	0	0	0	0	0	0	0	0	0	0	0	0	0	0	0	0	0	0	0	0	0	0	0	0	0	0	0
snoRNA	ENSMMUG00000027836	7	4097331	4097412	+	0	0	0	0	0	0	0	0	0	0	0	0	0	0	0	0	0	0	0	0	0	0	0	0	0	0	0	0	0	0
snoRNA	ENSMMUG00000027630	7	4099258	4099338	+	0	0	0	0	0	0	0	0	0	0	0	0	0	0	0	0	0	0	0	0	0	0	0	0	0	0	0	0	0	0
snoRNA	ENSMMUG00000028191	7	4102906	4102985	+	0	0	0	0	0	0	0	0	0	0	0	0	0	0	0	0	0	0	0	0	0	0	0	0	0	0	0	0	0	0
snoRNA	ENSMMUG00000028318	7	4104710	4104790	+	0	0	0	0	0	0	0	0	0	0	0	0	0	0	0	0	0	0	0	0	0	0	0	0	0	0	0	0	0	0
snoRNA	ENSMMUG00000027932	7	4106600	4106680	+	0	0	0	0	0	0	0	0	0	0	0	0	0	0	0	0	0	0	0	0	0	0	0	0	0	0	0	0	0	0
snoRNA	ENSMMUG00000027646	7	4115091	4115170	+	0	0	0	0	0	0	0	0	0	0	0	0	0	0	0	0	0	0	0	0	0	0	0	0	0	0	0	0	0	0
snoRNA	ENSMMUG00000028454	7	4117068	4117149	+	0	0	0	0	0	0	0	0	0	0	0	0	0	0	0	0	0	0	0	0	0	0	0	0	0	0	0	0	0	0
snoRNA	ENSMMUG00000028166	7	4118965	4119046	+	0	0	0	0	0	0	0	0	0	0	0	0	0	0	0	0	0	0	0	0	0	0	0	0	0	0	0	0	0	0
snoRNA	ENSMMUG00000027795	7	4120865	4120946	+	0	0	0	0	0	0	0	0	0	0	0	0	0	0	0	0	0	0	0	0	0	0	0	0	0	0	0	0	0	0
snoRNA	ENSMMUG00000027783	7	4122759	4122839	+	0	0	0	0	0	0	0	0	0	0	0	0	0	0	0	0	0	0	0	0	0	0	0	0	0	0	0	0	0	0
snoRNA	ENSMMUG00000027458	7	4124647	4124728	+	0	0	0	0	0	0	0	0	0	0	0	0	0	0	0	0	0	0	0	0	0	0	0	0	0	0	0	0	0	0
snoRNA	ENSMMUG00000027718	7	4126546	4126627	+	0	0	0	0	0	0	0	0	0	0	0	0	0	0	0	0	0	0	0	0	0	0	0	0	0	0	0	0	0	0
snoRNA	ENSMMUG00000028463	7	4128140	4128221	+	0	0	0	0	0	0	0	0	0	0	0	0	0	0	0	0	0	0	0	0	0	0	0	0	0	0	0	0	0	0
snoRNA	ENSMMUG00000027710	7	4130061	4130141	+	0	0	0	0	0	0	0	0	0	0	0	0	0	0	0	0	0	0	0	0	0	0	0	0	0	0	0	0	0	0
snoRNA	ENSMMUG00000027865	7	4132726	4132807	+	0	0	0	0	0	0	0	0	0	0	0	0	0	0	0	0	0	0	0	0	0	0	0	0	0	0	0	0	0	0
snoRNA	ENSMMUG00000028300	7	4134312	4134393	+	0	0	0	0	0	0	0	0	0	0	0	0	0	0	0	0	0	0	0	0	0	0	0	0	0	0	0	0	0	0
snoRNA	ENSMMUG00000028243	7	4136216	4136296	+	0	0	0	0	0	0	0	0	0	0	0	0	0	0	0	0	0	0	0	0	0	0	0	0	0	0	0	0	0	0
snoRNA	ENSMMUG00000028430	7	4138875	4138956	+	0	0	0	0	0	0	0	0	0	0	0	0	0	0	0	0	0	0	0	0	0	0	0	0	0	0	0	0	0	0
snoRNA	ENSMMUG00000027820	7	4140458	4140539	+	0	0	0	0	0	0	0	0	0	0	0	0	0	0	0	0	0	0	0	0	0	0	0	0	0	0	0	0	0	0
snoRNA	ENSMMUG00000027812	7	4142382	4142462	+	0	0	0	0	0	0	0	0	0	0	0	0	0	0	0	0	0	0	0	0	0	0	0	0	0	0	0	0	0	0
snoRNA	ENSMMUG00000027756	7	4145041	4145122	+	0	0	0	0	0	0	0	0	0	0	0	0	0	0	0	0	0	0	0	0	0	0	0	0	0	0	0	0	0	0
snoRNA	ENSMMUG00000027761	7	4146907	4146988	+	0	0	0	0	0	0	0	0	0	0	0	0	0	0	0	0	0	0	0	0	0	0	0	0	0	0	0	0	0	0
snoRNA	ENSMMUG00000027740	7	4148797	4148877	+	0	0	0	0	0	0	0	0	0	0	0	0	0	0	0	0	0	0	0	0	0	0	0	0	0	0	0	0	0	0
snoRNA	ENSMMUG00000028396	7	4149946	4150027	+	0	0	0	0	0	0	0	0	0	0	0	0	0	0	0	0	0	0	0	0	0	0	0	0	0	0	0	0	0	0
snoRNA	ENSMMUG00000028379	7	4151846	4151927	+	0	0	0	0	0	0	0	0	0	0	0	0	0	0	0	0	0	0	0	0	0	0	0	0	0	0	0	0	0	0
snoRNA	ENSMMUG00000027768	7	4153764	4153845	+	0	0	0	0	0	0	0	0	0	0	0	0	0	0	0	0	0	0	0	0	0	0	0	0	0	0	0	0	0	0
snoRNA	ENSMMUG00000028127	7	4155585	4155665	+	0	0	0	0	0	0	0	0	0	0	0	0	0	0	0	0	0	0	0	0	0	0	0	0	0	0	0	0	0	0
snoRNA	ENSMMUG00000027940	7	4156232	4156313	+	0	0	0	0	0	0	0	0	0	0	0	0	0	0	0	0	0	0	0	0	0	0	0	0	0	0	0	0	0	0
snoRNA	ENSMMUG00000024201	7	4158099	4158180	+	0	0	0	0	0	0	0	0	0	0	0	0	0	0	0	0	0	0	0	0	0	0	0	0	0	0	0	0	0	0
snoRNA	ENSMMUG00000027951	7	4159977	4160058	+	0	0	0	0	0	0	0	0	0	0	0	0	0	0	0	0	0	0	0	0	0	0	0	0	0	0	0	0	0	0
snoRNA	ENSMMUG00000028027	7	4161881	4161962	+	0	0	0	0	0	0	0	0	0	0	0	0	0	0	0	0	0	0	0	0	0	0	0	0	0	0	0	0	0	0
snoRNA	ENSMMUG00000027351	7	4164788	4164869	+	0	0	0	0	0	0	0	0	0	0	0	0	0	0	0	0	0	0	0	0	0	0	0	0	0	0	0	0	0	0
snoRNA	ENSMMUG00000027476	7	4166667	4166748	+	0	0	0	0	0	0	0	0	0	0	0	0	0	0	0	0	0	0	0	0	0	0	0	0	0	0	0	0	0	0
snoRNA	ENSMMUG00000027620	7	4168527	4168608	+	0	0	0	0	0	0	0	0	0	0	0	0	0	0	0	0	0	0	0	0	0	0	0	0	0	0	0	0	0	0
snoRNA	ENSMMUG00000027508	7	4169428	4169509	+	0	0	0	0	0	0	0	0	0	0	0	0	0	0	0	0	0	0	0	0	0	0	0	0	0	0	0	0	0	0
snoRNA	ENSMMUG00000028109	7	4171203	4171284	+	0	0	0	0	0	0	0	0	0	0	0	0	0	0	0	0	0	0	0	0	0	0	0	0	0	0	0	0	0	0
snoRNA	ENSMMUG00000028163	7	4173091	4173172	+	0	0	0	0	0	0	0	0	0	0	0	0	0	0	0	0	0	0	0	0	0	0	0	0	0	0	0	0	0	0
snoRNA	ENSMMUG00000027679	7	4174973	4175054	+	0	0	0	0	0	0	0	0	0	0	0	0	0	0	0	0	0	0	0	0	0	0	0	0	0	0	0	0	0	0
snoRNA	ENSMMUG00000028013	7	4176854	4176935	+	0	0	0	0	0	0	0	0	0	0	0	0	0	0	0	0	0	0	0	0	0	0	0	0	0	0	0	0	0	0
snoRNA	ENSMMUG00000028096	7	4178722	4178803	+	0	0	0	0	0	0	0	0	0	0	0	0	0	0	0	0	0	0	0	0	0	0	0	0	0	0	0	0	0	0
snoRNA	ENSMMUG00000027874	7	4180573	4180653	+	0	0	0	0	0	0	0	0	0	0	0	0	0	0	0	0	0	0	0	0	0	0	0	0	0	0	0	0	0	0
snoRNA	ENSMMUG00000028150	7	4182477	4182558	+	0	0	0	0	0	0	0	0	0	0	0	0	0	0	0	0	0	0	0	0	0	0	0	0	0	0	0	0	0	0
snoRNA	ENSMMUG00000027365	7	4184340	4184420	+	0	0	0	0	0	0	0	0	0	0	0	0	0	0	0	0	0	0	0	0	0	0	0	0	0	0	0	0	0	0
snoRNA	ENSMMUG00000028365	7	4186034	4186114	+	0	0	0	0	0	0	0	0	0	0	0	0	0	0	0	0	0	0	0	0	0	0	0	0	0	0	0	0	0	0
snoRNA	ENSMMUG00000028161	7	4187907	4187988	+	0	0	0	0	0	0	0	0	0	0	0	0	0	0	0	0	0	0	0	0	0	0	0	0	0	0	0	0	0	0
snoRNA	ENSMMUG00000028218	7	4189769	4189849	+	0	0	0	0	0	0	0	0	0	0	0	0	0	0	0	0	0	0	0	0	0	0	0	0	0	0	0	0	0	0
snoRNA	ENSMMUG00000027724	7	4191630	4191711	+	0	0	0	0	0	0	0	0	0	0	0	0	0	0	0	0	0	0	0	0	0	0	0	0	0	0	0	0	0	0
snoRNA	ENSMMUG00000027606	7	4193492	4193572	+	0	0	0	0	0	0	0	0	0	0	0	0	0	0	0	0	0	0	0	0	0	0	0	0	0	0	0	0	0	0
snoRNA	ENSMMUG00000027822	7	4195046	4195127	+	0	0	0	0	0	0	0	0	0	0	0	0	0	0	0	0	0	0	0	0	0	0	0	0	0	0	0	0	0	0
snoRNA	ENSMMUG00000027917	7	4196727	4196808	+	0	0	0	0	0	0	0	0	0	0	0	0	0	0	0	0	0	0	0	0	0	0	0	0	0	0	0	0	0	0
snoRNA	ENSMMUG00000036584	7	4198243	4198307	+	0	0	0	0	0	0	0	0	0	0	0	0	0	0	0	0	0	0	0	0	0	0	0	0	0	0	0	0	0	0
snoRNA	ENSMMUG00000032805	7	4209173	4209253	+	0	0	0	0	0	0	0	0	0	0	0	0	0	0	0	0	0	0	0	0	0	0	0	0	0	0	0	0	0	0
snoRNA	ENSMMUG00000032788	7	4211251	4211330	+	0	0	0	0	0	0	0	0	0	0	0	0	0	0	0	0	0	0	0	0	0	0	0	0	0	0	0	0	0	0
snoRNA	ENSMMUG00000033113	7	4213207	4213274	+	0	0	0	0	0	0	0	0	0	0	0	0	0	0	0	0	0	0	0	0	0	0	0	0	0	0	0	0	0	0
snoRNA	ENSMMUG00000024733	7	4214498	4214573	+	0	0	0	0	0	0	0	0	0	0	0	0	0	0	0	0	0	0	0	0	0	0	0	0	0	0	0	0	0	0
snoRNA	ENSMMUG00000037359	7	4222782	4222848	+	0	0	0	0	0	0	0	0	0	0	0	0	0	0	0	0	0	0	0	0	0	0	0	0	0	0	0	0	0	0
snoRNA	ENSMMUG00000027767	7	8574103	8574223	+	0	0	0	0	0	0	0	0	0	0	0	0	0	0	0	0	0	0	0	0	0	0	0	0	0	0	0	0	0	0
snRNA	ENSMMUG00000025365	7	9293510	9293611	-	0	0	0	0	0	0	0	0	0	0	0	0	0	0	0	0	0	0	0	0	0	0	0	0	0	0	0	0	0	0
snoRNA	ENSMMUG00000025888	7	10219434	10219566	+	0	0	0	0	0	0	0	0	0	0	0	0	0	0	0	0	0	0	0	0	0	0	0	0	0	0	0	0	0	0
snoRNA	ENSMMUG00000035880	7	11123264	11123368	+	0	0	0	0	0	0	0	0	0	0	0	0	0	0	0	0	0	0	0	0	0	0	0	0	0	0	0	0	0	0
snoRNA	ENSMMUG00000033028	7	11197714	11197783	+	0	0	0	0	0	0	0	0	0	0	0	0	0	0	0	0	0	0	0	0	0	0	0	0	0	0	0	0	0	0
snRNA	ENSMMUG00000025312	7	12264717	12264820	-	0	0	0	0	0	0	0	0	0	0	0	0	0	0	0	0	0	0	0	0	0	0	0	0	0	0	0	0	0	0
snoRNA	ENSMMUG00000036492	7	12922985	12923083	-	0	0	0	0	0	0	0	0	0	0	0	0	0	0	0	0	0	0	0	0	0	0	0	0	0	0	0	0	0	0
tRNA	tRNA-Tyr-GTA-15-1	7	14018644	14018710	+	0	0	0	0	0	0	0	0	0	0	0	0	0	0	0	0	0	0	0	0	0	0	0	0	0	0	0	0	0	0
tRNA	tRNA-Asn-GTT-17-1	7	14018808	14018881	+	0	0	0	0	0	0	0	0	0	0	0	0	0	0	0	0	0	0	0	0	0	0	0	0	0	0	0	0	0	0
snoRNA	ENSMMUG00000033103	7	15180119	15180337	+	0	0	0	0	0	0	0	0	0	0	0	0	0	0	0	0	0	0	0	0	0	0	0	0	0	0	0	0	0	0
tRNA	tRNA-Ser-GCT-3-3	7	17831387	17831469	-	0	0	0	0	0	0	0	0	0	0	0	0	0	0	0	0	0	0	0	0	0	0	0	0	0	0	0	0	0	0
snoRNA	ENSMMUG00000035628	7	18256857	18256958	+	0	0	0	0	0	0	0	0	0	0	0	0	0	0	0	0	0	0	0	0	0	0	0	0	0	0	0	0	0	0
snRNA	ENSMMUG00000036351	7	18884969	18885061	+	0	0	0	0	0	0	0	0	0	0	0	0	0	0	0	0	0	0	0	0	0	0	0	0	0	0	0	0	0	0
snoRNA	ENSMMUG00000035481	7	18973675	18973772	-	0	0	0	0	0	0	0	0	0	0	0	0	0	0	0	0	0	0	0	0	0	0	0	0	0	0	0	0	0	0
snRNA	ENSMMUG00000035061	7	19833239	19833338	-	0	0	0	0	0	0	0	0	0	0	0	0	0	0	0	0	0	0	0	0	0	0	0	0	0	0	0	0	0	0
tRNA	tRNA-Gly-GCC-7-1	7	20040770	20040841	-	0	0	0	0	0	0	0	0	0	0	0	0	0	0	0	0	0	0	0	0	0	0	0	0	0	0	0	0	0	0
snRNA	ENSMMUG00000024133	7	20856643	20856749	-	0	0	0	0	0	0	0	0	0	0	0	0	0	0	0	0	0	0	0	0	0	0	0	0	0	0	0	0	0	0
snoRNA	ENSMMUG00000036195	7	21177452	21177552	-	0	0	0	0	0	0	0	0	0	0	0	0	0	0	0	0	0	0	0	0	0	0	0	0	0	0	0	0	0	0
snRNA	ENSMMUG00000036713	7	22046407	22046514	+	0	0	0	0	0	0	0	0	0	0	0	0	0	0	0	0	0	0	0	0	0	0	0	0	0	0	0	0	0	0
snoRNA	ENSMMUG00000036388	7	22057459	22057562	+	0	0	0	0	0	0	0	0	0	0	0	0	0	0	0	0	0	0	0	0	0	0	0	0	0	0	0	0	0	0
snRNA	ENSMMUG00000027506	7	22080080	22080186	-	0	0	0	0	0	0	0	0	0	0	0	0	0	0	0	0	0	0	0	0	0	0	0	0	0	0	0	0	0	0
snRNA	ENSMMUG00000026212	7	22094185	22094291	+	0	0	0	0	0	0	0	0	0	0	0	0	0	0	0	0	0	0	0	0	0	0	0	0	0	0	0	0	0	0
snoRNA	ENSMMUG00000035558	7	22099407	22099510	+	0	0	0	0	0	0	0	0	0	0	0	0	0	0	0	0	0	0	0	0	0	0	0	0	0	0	0	0	0	0
snRNA	ENSMMUG00000027772	7	22121800	22121906	-	0	0	0	0	0	0	0	0	0	0	0	0	0	0	0	0	0	0	0	0	0	0	0	0	0	0	0	0	0	0
tRNA	tRNA-His-GTG-3-6	7	22386198	22386270	-	0	0	0	0	0	0	0	0	0	0	0	0	0	0	0	0	0	0	0	0	0	0	0	0	0	0	0	0	0	0
tRNA	tRNA-Gln-TTG-4-1	7	22387959	22388031	-	0	0	0	0	0	0	0	0	0	0	0	0	0	0	0	0	0	0	0	0	0	0	0	0	0	0	0	0	0	0
tRNA	tRNA-His-GTG-3-7	7	22388698	22388770	+	0	0	0	0	0	0	0	0	0	0	0	0	0	0	0	0	0	0	0	0	0	0	0	0	0	0	0	0	0	0
snoRNA	ENSMMUG00000036326	7	23243702	23243751	+	0	0	0	0	0	0	0	0	0	0	0	0	0	0	0	0	0	0	0	0	0	0	0	0	0	0	0	0	0	0
snRNA	ENSMMUG00000035805	7	23247100	23247203	-	0	0	0	0	0	0	0	0	0	0	0	0	0	0	0	0	0	0	0	0	0	0	0	0	0	0	0	0	0	0
snRNA	ENSMMUG00000036101	7	23260251	23260354	+	0	0	0	0	0	0	0	0	0	0	0	0	0	0	0	0	0	0	0	0	0	0	0	0	0	0	0	0	0	0
snoRNA	ENSMMUG00000036408	7	23263459	23263508	-	0	0	0	0	0	0	0	0	0	0	0	0	0	0	0	0	0	0	0	0	0	0	0	0	0	0	0	0	0	0
snRNA	ENSMMUG00000037089	7	23270538	23270641	+	0	0	0	0	0	0	0	0	0	0	0	0	0	0	0	0	0	0	0	0	0	0	0	0	0	0	0	0	0	0
snRNA	ENSMMUG00000033003	7	23329099	23329258	-	0	0	0	0	0	0	0	0	0	0	0	0	0	0	0	0	0	0	0	0	0	0	0	0	0	0	0	0	0	0
snRNA	ENSMMUG00000027575	7	23696407	23696513	-	0	0	0	0	0	0	0	0	0	0	0	0	0	0	0	0	0	0	0	0	0	0	0	0	0	0	0	0	0	0
snRNA	ENSMMUG00000036072	7	23789363	23789425	-	0	0	0	0	0	0	0	0	0	0	0	0	0	0	0	0	0	0	0	0	0	0	0	0	0	0	0	0	0	0
snoRNA	ENSMMUG00000036690	7	23835071	23835174	-	0	0	0	0	0	0	0	0	0	0	0	0	0	0	0	0	0	0	0	0	0	0	0	0	0	0	0	0	0	0
snoRNA	ENSMMUG00000024944	7	23884886	23885013	+	0	0	0	0	0	0	0	0	0	0	0	0	0	0	0	0	0	0	0	0	0	0	0	0	0	0	0	0	0	0
snoRNA	ENSMMUG00000035755	7	24694703	24694783	-	0	0	0	0	0	0	0	0	0	0	0	0	0	0	0	0	0	0	0	0	0	0	0	0	0	0	0	0	0	0
snRNA	ENSMMUG00000037329	7	24985979	24986081	+	0	0	0	0	0	0	0	0	0	0	0	0	0	0	0	0	0	0	0	0	0	0	0	0	0	0	0	0	0	0
snRNA	ENSMMUG00000028357	7	28662097	28662203	-	0	0	0	0	0	0	0	0	0	0	0	0	0	0	0	0	0	0	0	0	0	0	0	0	0	0	0	0	0	0
snRNA	ENSMMUG00000025392	7	30200079	30200184	+	0	0	0	0	0	0	0	0	0	0	0	0	0	0	0	0	0	0	0	0	0	0	0	0	0	0	0	0	0	0
snRNA	ENSMMUG00000034568	7	31927132	31927294	+	0	0	0	0	0	0	0	0	0	0	0	0	0	0	0	0	0	0	0	0	0	0	0	0	0	0	0	0	0	0
snRNA	ENSMMUG00000027443	7	32034815	32034921	+	0	0	0	0	0	0	0	0	0	0	0	0	0	0	0	0	0	0	0	0	0	0	0	0	0	0	0	0	0	0
snoRNA	ENSMMUG00000036176	7	34278432	34278536	-	0	0	0	0	0	0	0	0	0	0	0	0	0	0	0	0	0	0	0	0	0	0	0	0	0	0	0	0	0	0
snRNA	ENSMMUG00000024054	7	34594673	34594780	-	0	0	0	0	0	0	0	0	0	0	0	0	0	0	0	0	0	0	0	0	0	0	0	0	0	0	0	0	0	0
snoRNA	ENSMMUG00000037148	7	35604686	35604789	-	0	0	0	0	0	0	0	0	0	0	0	0	0	0	0	0	0	0	0	0	0	0	0	0	0	0	0	0	0	0
snRNA	ENSMMUG00000036401	7	35739473	35739574	-	0	0	0	0	0	0	0	0	0	0	0	0	0	0	0	0	0	0	0	0	0	0	0	0	0	0	0	0	0	0
snRNA	ENSMMUG00000036641	7	36001547	36001603	+	0	0	0	0	0	0	0	0	0	0	0	0	0	0	0	0	0	0	0	0	0	0	0	0	0	0	0	0	0	0
snoRNA	ENSMMUG00000036081	7	36934516	36934619	-	0	0	0	0	0	0	0	0	0	0	0	0	0	0	0	0	0	0	0	0	0	0	0	0	0	0	0	0	0	0
snRNA	ENSMMUG00000028450	7	37584614	37584754	-	0	0	0	0	0	0	0	0	0	0	0	0	0	0	0	0	0	0	0	0	0	0	0	0	0	0	0	0	0	0
snRNA	ENSMMUG00000024956	7	37716174	37716278	-	0	0	0	0	0	0	0	0	0	0	0	0	0	0	0	0	0	0	0	0	0	0	0	0	0	0	0	0	0	0
snoRNA	ENSMMUG00000036428	7	37763920	37764029	+	0	0	0	0	0	0	0	0	0	0	0	0	0	0	0	0	0	0	0	0	0	0	0	0	0	0	0	0	0	0
snoRNA	ENSMMUG00000036366	7	42074869	42074940	-	0	0	0	0	0	0	0	0	0	0	0	0	0	0	0	0	0	0	0	0	0	0	0	0	0	0	0	0	0	0
snRNA	ENSMMUG00000036618	7	42760704	42760802	+	0	0	0	0	0	0	0	0	0	0	0	0	0	0	0	0	0	0	0	0	0	0	0	0	0	0	0	0	0	0
snoRNA	ENSMMUG00000035716	7	42773638	42773770	+	0	0	0	0	0	0	0	0	0	0	0	0	0	0	0	0	0	0	0	0	0	0	0	0	0	0	0	0	0	0
snRNA	ENSMMUG00000027968	7	43130902	43131008	+	0	0	0	0	0	0	0	0	0	0	0	0	0	0	0	0	0	0	0	0	0	0	0	0	0	0	0	0	0	0
snRNA	ENSMMUG00000027699	7	43708439	43708542	+	0	0	0	0	0	0	0	0	0	0	0	0	0	0	0	0	0	0	0	0	0	0	0	0	0	0	0	0	0	0
snoRNA	ENSMMUG00000028237	7	43769006	43769136	-	0	0	0	0	0	0	0	0	0	0	0	0	0	0	0	0	0	0	0	0	0	0	0	0	0	0	0	0	0	0
snRNA	ENSMMUG00000028536	7	43780865	43780981	+	6	13	12	4	5	10	6	13	4	4	3	2	4	10	4	10	24	9	7	3	10	3	11	4	10	18	6	10	13	6
tRNA	tRNA-Gln-CTG-1-3	7	44045924	44045996	-	0	0	0	0	0	0	0	0	0	0	0	0	0	0	0	0	0	0	0	0	0	0	0	0	0	0	0	0	0	0
snoRNA	ENSMMUG00000036799	7	44063531	44063631	-	0	0	0	0	0	0	0	0	0	0	0	0	0	0	0	0	0	0	0	0	0	0	0	0	0	0	0	0	0	0
snoRNA	ENSMMUG00000036863	7	44189819	44189922	-	0	0	0	0	0	0	0	0	0	0	0	0	0	0	0	0	0	0	0	0	0	0	0	0	0	0	0	0	0	0
snRNA	ENSMMUG00000035748	7	44346664	44346767	+	0	0	0	0	0	0	0	0	0	0	0	0	0	0	0	0	0	0	0	0	0	0	0	0	0	0	0	0	0	0
snoRNA	ENSMMUG00000036757	7	44873494	44873628	-	1	1	3	2	0	1	0	0	1	1	0	1	1	2	0	2	2	0	1	1	1	1	1	0	0	0	1	1	1	0
snoRNA	ENSMMUG00000024353	7	45035260	45035329	-	1	1	1	1	1	0	1	1	3	1	1	2	1	1	0	1	1	0	2	1	2	0	2	0	1	0	1	1	2	1
snoRNA	ENSMMUG00000026093	7	45036039	45036110	-	0	0	0	0	0	0	0	0	0	0	0	0	0	0	0	0	0	0	0	0	0	0	0	0	0	0	0	0	0	0
snoRNA	ENSMMUG00000026037	7	45036812	45036910	-	3	3	8	3	3	4	3	4	4	6	3	7	2	3	1	2	7	2	5	3	12	0	5	1	3	5	4	7	9	3
snoRNA	ENSMMUG00000026792	7	45037238	45037309	-	3	6	7	1	4	6	5	4	7	7	6	8	2	4	0	4	6	3	6	3	16	1	6	3	5	6	6	4	7	5
snRNA	ENSMMUG00000024083	7	46423705	46423811	-	0	0	0	0	0	0	0	0	0	0	0	0	0	0	0	0	0	0	0	0	0	0	0	0	0	0	0	0	0	0
snoRNA	ENSMMUG00000033527	7	47981055	47981182	-	0	0	0	0	0	0	0	0	0	0	0	0	0	0	0	0	0	0	0	0	0	0	0	0	0	0	0	0	0	0
snoRNA	ENSMMUG00000026447	7	48106109	48106322	-	0	0	0	0	0	0	0	0	0	0	0	0	0	0	0	0	0	0	0	0	0	0	0	0	0	0	0	0	0	0
snRNA	ENSMMUG00000034159	7	48836784	48836889	+	0	0	0	0	0	0	0	0	0	0	0	0	0	0	0	0	0	0	0	0	0	0	0	0	0	0	0	0	0	0
snoRNA	ENSMMUG00000036897	7	51185235	51185327	-	0	0	0	0	0	0	0	0	0	0	0	0	0	0	0	0	0	0	0	0	0	0	0	0	0	0	0	0	0	0
snoRNA	ENSMMUG00000033166	7	53286497	53286566	-	0	0	0	0	0	0	0	0	0	0	0	0	0	0	0	0	0	0	0	0	0	0	0	0	0	0	0	0	0	0
snoRNA	ENSMMUG00000036459	7	53944647	53944749	-	0	0	0	0	0	0	0	0	0	0	0	0	0	0	0	0	0	0	0	0	0	0	0	0	0	0	0	0	0	0
snoRNA	ENSMMUG00000036725	7	54790911	54790981	-	0	0	0	0	0	0	0	0	0	0	0	0	0	0	0	0	0	0	0	0	0	0	0	0	0	0	0	0	0	0
tRNA	tRNA-Lys-CTT-4-1	7	54810517	54810591	-	0	0	0	0	0	0	0	0	0	0	0	0	0	0	0	0	0	0	0	0	0	0	0	0	0	0	0	0	0	0
snoRNA	ENSMMUG00000026292	7	57126151	57126273	-	0	0	0	0	0	0	0	0	0	0	0	0	0	0	0	0	0	0	0	0	0	0	0	0	0	0	0	0	0	0
tRNA	tRNA-Lys-CTT-1-5	7	57388462	57388535	+	0	0	0	0	0	0	0	0	0	0	0	0	0	0	0	0	0	0	0	0	0	0	0	0	0	0	0	0	0	0
snRNA	ENSMMUG00000036646	7	58022143	58022240	-	0	0	0	0	0	0	0	0	0	0	0	0	0	0	0	0	0	0	0	0	0	0	0	0	0	0	0	0	0	0
tRNA	tRNA-Cys-GCA-10-1	7	58290999	58291071	+	0	0	0	0	0	0	0	0	0	0	0	0	0	0	0	0	0	0	0	0	0	0	0	0	0	0	0	0	0	0
snRNA	ENSMMUG00000034822	7	58936669	58936772	-	0	0	0	0	0	0	0	0	0	0	0	0	0	0	0	0	0	0	0	0	0	0	0	0	0	0	0	0	0	0
snoRNA	ENSMMUG00000037410	7	59260204	59260273	+	0	0	0	0	0	0	0	0	0	0	0	0	0	0	0	0	0	0	0	0	0	0	0	0	0	0	0	0	0	0
snRNA	ENSMMUG00000032822	7	59824764	59824870	+	0	0	0	0	0	0	0	0	0	0	0	0	0	0	0	0	0	0	0	0	0	0	0	0	0	0	0	0	0	0
snRNA	ENSMMUG00000024761	7	62672811	62672917	+	0	0	0	0	0	0	0	0	0	0	0	0	0	0	0	0	0	0	0	0	0	0	0	0	0	0	0	0	0	0
snRNA	ENSMMUG00000036321	7	62798352	62798454	-	0	0	0	0	0	0	0	0	0	0	0	0	0	0	0	0	0	0	0	0	0	0	0	0	0	0	0	0	0	0
snoRNA	ENSMMUG00000036436	7	63785859	63785985	-	69	51	49	62	86	42	85	44	143	38	29	86	47	23	61	64	44	41	71	48	50	41	104	86	26	42	38	49	41	36
snRNA	ENSMMUG00000035476	7	64346803	64346905	+	0	0	0	0	0	0	0	0	0	0	0	0	0	0	0	0	0	0	0	0	0	0	0	0	0	0	0	0	0	0
snRNA	ENSMMUG00000027931	7	64347999	64348105	+	0	0	0	0	0	0	0	0	0	0	0	0	0	0	0	0	0	0	0	0	0	0	0	0	0	0	0	0	0	0
snoRNA	ENSMMUG00000025913	7	64439566	64439683	+	0	0	0	0	0	0	0	0	0	0	0	0	0	0	0	0	0	0	0	0	0	0	0	0	0	0	0	0	0	0
snRNA	ENSMMUG00000037045	7	65010088	65010149	-	0	0	0	0	0	0	0	0	0	0	0	0	0	0	0	0	0	0	0	0	0	0	0	0	0	0	0	0	0	0
snRNA	ENSMMUG00000026267	7	65255510	65255619	-	0	0	0	0	0	0	0	0	0	0	0	0	0	0	0	0	0	0	0	0	0	0	0	0	0	0	0	0	0	0
snoRNA	ENSMMUG00000025585	7	65779621	65779691	-	0	0	0	0	0	0	0	0	0	0	0	0	0	0	0	0	0	0	0	0	0	0	0	0	0	0	0	0	0	0
snRNA	ENSMMUG00000024224	7	67097265	67097364	-	0	0	0	0	0	0	0	0	0	0	0	0	0	0	0	0	0	0	0	0	0	0	0	0	0	0	0	0	0	0
tRNA	tRNA-Arg-TCG-1-1	7	68414507	68414580	+	0	0	0	0	0	0	0	0	0	0	0	0	0	0	0	0	0	0	0	0	0	0	0	0	0	0	0	0	0	0
snRNA	ENSMMUG00000036488	7	68744836	68744896	+	0	0	0	0	0	0	0	0	0	0	0	0	0	0	0	0	0	0	0	0	0	0	0	0	0	0	0	0	0	0
snRNA	ENSMMUG00000028066	7	69340605	69340711	+	0	0	0	0	0	0	0	0	0	0	0	0	0	0	0	0	0	0	0	0	0	0	0	0	0	0	0	0	0	0
snRNA	ENSMMUG00000035649	7	69532679	69532740	+	0	0	0	0	0	0	0	0	0	0	0	0	0	0	0	0	0	0	0	0	0	0	0	0	0	0	0	0	0	0
snoRNA	ENSMMUG00000037017	7	69920689	69920744	-	0	0	0	0	0	0	0	0	0	0	0	0	0	0	0	0	0	0	0	0	0	0	0	0	0	0	0	0	0	0
snoRNA	ENSMMUG00000026331	7	70469529	70469598	-	0	0	0	0	0	0	0	0	0	0	0	0	0	0	0	0	0	0	0	0	0	0	0	0	0	0	0	0	0	0
snoRNA	ENSMMUG00000036286	7	71683926	71684029	+	0	0	0	0	0	0	0	0	0	0	0	0	0	0	0	0	0	0	0	0	0	0	0	0	0	0	0	0	0	0
snoRNA	ENSMMUG00000036502	7	72274362	72274504	+	0	0	0	0	0	0	0	0	0	0	0	0	0	0	0	0	0	0	0	0	0	0	0	0	0	0	0	0	0	0
snRNA	ENSMMUG00000035420	7	75650504	75650693	+	0	0	0	0	0	0	0	0	0	0	0	0	0	0	0	0	0	0	0	0	0	0	0	0	0	0	0	0	0	0
snRNA	ENSMMUG00000025839	7	78029702	78029807	+	0	0	0	0	0	0	0	0	0	0	0	0	0	0	0	0	0	0	0	0	0	0	0	0	0	0	0	0	0	0
snRNA	ENSMMUG00000036494	7	78075759	78075855	-	0	0	0	0	0	0	0	0	0	0	0	0	0	0	0	0	0	0	0	0	0	0	0	0	0	0	0	0	0	0
snRNA	ENSMMUG00000027777	7	80688078	80688184	-	0	0	0	0	0	0	0	0	0	0	0	0	0	0	0	0	0	0	0	0	0	0	0	0	0	0	0	0	0	0
snoRNA	ENSMMUG00000036423	7	81268737	81268854	+	0	0	0	0	0	0	0	0	0	0	0	0	0	0	0	0	0	0	0	0	0	0	0	0	0	0	0	0	0	0
snRNA	ENSMMUG00000036797	7	81767399	81767505	-	0	0	0	0	0	0	0	0	0	0	0	0	0	0	0	0	0	0	0	0	0	0	0	0	0	0	0	0	0	0
snoRNA	ENSMMUG00000036861	7	81812356	81812455	+	0	0	0	0	0	0	0	0	0	0	0	0	0	0	0	0	0	0	0	0	0	0	0	0	0	0	0	0	0	0
tRNA	tRNA-Pro-AGG-1-3	7	82690024	82690096	-	0	0	0	0	0	0	0	0	0	0	0	0	0	0	0	0	0	0	0	0	0	0	0	0	0	0	0	0	0	0
tRNA	tRNA-Leu-AAG-4-3	7	82690792	82690874	+	0	0	0	0	0	0	0	0	0	0	0	0	0	0	0	0	0	0	0	0	0	0	0	0	0	0	0	0	0	0
tRNA	tRNA-Pro-AGG-1-4	7	82694396	82694468	-	0	0	0	0	0	0	0	0	0	0	0	0	0	0	0	0	0	0	0	0	0	0	0	0	0	0	0	0	0	0
tRNA	tRNA-Thr-TGT-4-1	7	82694790	82694863	-	0	0	0	0	0	0	0	0	0	0	0	0	0	0	0	0	0	0	0	0	0	0	0	0	0	0	0	0	0	0
tRNA	tRNA-Leu-TAG-4-1	7	82707720	82707802	+	0	0	0	0	0	0	0	0	0	0	0	0	0	0	0	0	0	0	0	0	0	0	0	0	0	0	0	0	0	0
tRNA	tRNA-Thr-TGT-5-1	7	82713537	82713610	-	0	0	0	0	0	0	0	0	0	0	0	0	0	0	0	0	0	0	0	0	0	0	0	0	0	0	0	0	0	0
tRNA	tRNA-Pro-TGG-1-1	7	82715432	82715504	+	0	0	0	0	0	0	0	0	0	0	0	0	0	0	0	0	0	0	0	0	0	0	0	0	0	0	0	0	0	0
tRNA	tRNA-Tyr-GTA-3-1	7	82747395	82747489	-	0	0	0	0	0	0	0	0	0	0	0	0	0	0	0	0	0	0	0	0	0	0	0	0	0	0	0	0	0	0
tRNA	tRNA-Tyr-GTA-3-2	7	82750904	82750997	-	0	0	0	0	0	0	0	0	0	0	0	0	0	0	0	0	0	0	0	0	0	0	0	0	0	0	0	0	0	0
tRNA	tRNA-Tyr-GTA-3-3	7	82753403	82753497	-	0	0	0	0	0	0	0	0	0	0	0	0	0	0	0	0	0	0	0	0	0	0	0	0	0	0	0	0	0	0
tRNA	tRNA-Tyr-GTA-3-4	7	82756634	82756724	-	0	0	0	0	0	0	0	0	0	0	0	0	0	0	0	0	0	0	0	0	0	0	0	0	0	0	0	0	0	0
tRNA	tRNA-Tyr-ATA-1-1	7	82762630	82762715	-	0	0	0	0	0	0	0	0	0	0	0	0	0	0	0	0	0	0	0	0	0	0	0	0	0	0	0	0	0	0
tRNA	tRNA-Thr-TGT-3-1	7	82774539	82774612	+	0	0	0	0	0	0	0	0	0	0	0	0	0	0	0	0	0	0	0	0	0	0	0	0	0	0	0	0	0	0
snoRNA	ENSMMUG00000036018	7	82774773	82774871	+	0	0	0	0	0	0	0	0	0	0	0	0	0	0	0	0	0	0	0	0	0	0	0	0	0	0	0	0	0	0
tRNA	tRNA-Tyr-GTA-3-5	7	82776128	82776257	+	0	0	0	0	0	0	0	0	0	0	0	0	0	0	0	0	0	0	0	0	0	0	0	0	0	0	0	0	0	0
tRNA	tRNA-Pro-TGG-3-2	7	82776904	82776976	+	0	0	0	0	0	0	0	0	0	0	0	0	0	0	0	0	0	0	0	0	0	0	0	0	0	0	0	0	0	0
snoRNA	ENSMMUG00000033026	7	82819192	82819322	-	0	0	0	0	0	0	0	0	0	0	0	0	0	0	0	0	0	0	0	0	0	0	0	0	0	0	0	0	0	0
snoRNA	ENSMMUG00000034909	7	83029996	83030143	-	0	0	0	0	0	0	0	0	0	0	0	0	0	0	0	0	0	0	0	0	0	0	0	0	0	0	0	0	0	0
snoRNA	ENSMMUG00000037064	7	83032731	83032807	-	0	0	0	0	0	0	0	0	0	0	0	0	0	0	0	0	0	0	0	0	0	0	0	0	0	0	0	0	0	0
snRNA	ENSMMUG00000034992	7	83828536	83828686	-	0	0	0	0	0	0	0	0	0	0	0	0	0	0	0	0	0	0	0	0	0	0	0	0	0	0	0	0	0	0
snRNA	ENSMMUG00000027809	7	83984994	83985134	-	0	0	0	0	0	0	0	0	0	0	0	0	0	0	0	0	0	0	0	0	0	0	0	0	0	0	0	0	0	0
snoRNA	ENSMMUG00000024826	7	84120495	84120598	-	0	1	2	0	0	2	1	1	0	1	1	0	1	1	0	1	1	1	1	1	3	0	0	0	1	1	0	0	0	1
snoRNA	ENSMMUG00000024873	7	84125920	84126029	-	0	0	0	0	0	0	0	0	0	0	0	0	0	0	0	0	0	0	0	0	0	0	0	0	0	0	0	0	0	0
tRNA	tRNA-Arg-ACG-4-2	7	85104781	85104854	+	0	0	0	0	0	0	0	0	0	0	0	0	0	0	0	0	0	0	0	0	0	0	0	0	0	0	0	0	0	0
snoRNA	ENSMMUG00000033134	7	85566132	85566200	-	0	0	0	0	0	0	0	0	0	0	0	0	0	0	0	0	0	0	0	0	0	0	0	0	0	0	0	0	0	0
snoRNA	ENSMMUG00000037116	7	85841720	85841940	+	0	0	0	0	0	0	0	0	0	0	0	0	0	0	0	0	0	0	0	0	0	0	0	0	0	0	0	0	0	0
snRNA	ENSMMUG00000028197	7	85987592	85987697	-	0	0	0	0	0	0	0	0	0	0	0	0	0	0	0	0	0	0	0	0	0	0	0	0	0	0	0	0	0	0
snRNA	ENSMMUG00000034337	7	86097827	86097933	-	0	0	0	0	0	0	0	0	0	0	0	0	0	0	0	0	0	0	0	0	0	0	0	0	0	0	0	0	0	0
snRNA	ENSMMUG00000024319	7	87249960	87250060	-	0	0	0	0	0	0	0	0	0	0	0	0	0	0	0	0	0	0	0	0	0	0	0	0	0	0	0	0	0	0
snRNA	ENSMMUG00000036543	7	87536382	87536475	-	0	0	0	0	0	0	0	0	0	0	0	0	0	0	0	0	0	0	0	0	0	0	0	0	0	0	0	0	0	0
snoRNA	ENSMMUG00000033147	7	88705465	88705530	-	0	0	0	0	0	0	0	0	0	0	0	0	0	0	0	0	0	0	0	0	0	0	0	0	0	0	0	0	0	0
snRNA	ENSMMUG00000036435	7	91882662	91882776	-	0	0	0	0	0	0	0	0	0	0	0	0	0	0	0	0	0	0	0	0	0	0	0	0	0	0	0	0	0	0
snRNA	ENSMMUG00000027435	7	92217952	92218058	-	0	0	0	0	0	0	0	0	0	0	0	0	0	0	0	0	0	0	0	0	0	0	0	0	0	0	0	0	0	0
snRNA	ENSMMUG00000034274	7	92364592	92364725	+	0	0	0	0	0	0	0	0	0	0	0	0	0	0	0	0	0	0	0	0	0	0	0	0	0	0	0	0	0	0
snRNA	ENSMMUG00000037415	7	92752696	92752798	+	0	0	0	0	0	0	0	0	0	0	0	0	0	0	0	0	0	0	0	0	0	0	0	0	0	0	0	0	0	0
snRNA	ENSMMUG00000034752	7	94098830	94098940	+	0	0	0	0	0	0	0	0	0	0	0	0	0	0	0	0	0	0	0	0	0	0	0	0	0	0	0	0	0	0
snRNA	ENSMMUG00000034842	7	94613711	94613816	-	0	0	0	0	0	0	0	0	0	0	0	0	0	0	0	0	0	0	0	0	0	0	0	0	0	0	0	0	0	0
snRNA	ENSMMUG00000027705	7	95136555	95136661	+	0	0	0	0	0	0	0	0	0	0	0	0	0	0	0	0	0	0	0	0	0	0	0	0	0	0	0	0	0	0
snRNA	ENSMMUG00000028180	7	95137679	95137785	-	0	0	0	0	0	0	0	0	0	0	0	0	0	0	0	0	0	0	0	0	0	0	0	0	0	0	0	0	0	0
snRNA	ENSMMUG00000027752	7	97488484	97488647	-	13	17	17	8	7	27	10	15	7	10	12	5	9	13	10	14	22	16	10	5	10	6	10	4	19	17	9	19	22	8
tRNA	tRNA-Asp-GTC-1-4	7	97502537	97502609	+	0	0	0	0	0	0	0	0	0	0	0	0	0	0	0	0	0	0	0	0	0	0	0	0	0	0	0	0	0	0
snRNA	ENSMMUG00000036148	7	97633385	97633488	+	0	0	0	0	0	0	0	0	0	0	0	0	0	0	0	0	0	0	0	0	0	0	0	0	0	0	0	0	0	0
snoRNA	ENSMMUG00000035204	7	98655904	98656111	-	0	0	0	0	0	0	0	0	0	0	0	0	0	0	0	0	0	0	0	0	0	0	0	0	0	0	0	0	0	0
snoRNA	ENSMMUG00000037219	7	98750239	98750342	-	0	0	0	0	0	0	0	0	0	0	0	0	0	0	0	0	0	0	0	0	0	0	0	0	0	0	0	0	0	0
snRNA	ENSMMUG00000036759	7	99371128	99371188	+	0	0	0	0	0	0	0	0	0	0	0	0	0	0	0	0	0	0	0	0	0	0	0	0	0	0	0	0	0	0
snRNA	ENSMMUG00000035178	7	100158825	100158925	+	0	0	0	0	0	0	0	0	0	0	0	0	0	0	0	0	0	0	0	0	0	0	0	0	0	0	0	0	0	0
snRNA	ENSMMUG00000025409	7	100422270	100422374	-	0	0	0	0	0	0	0	0	0	0	0	0	0	0	0	0	0	0	0	0	0	0	0	0	0	0	0	0	0	0
snoRNA	ENSMMUG00000024917	7	100717411	100717546	+	0	0	0	0	0	0	0	0	0	0	0	0	0	0	0	0	0	0	0	0	0	0	0	0	0	0	0	0	0	0
snRNA	ENSMMUG00000025806	7	100801595	100801701	-	0	0	0	0	0	0	0	0	0	0	0	0	0	0	0	0	0	0	0	0	0	0	0	0	0	0	0	0	0	0
snoRNA	ENSMMUG00000036123	7	104625762	104625892	+	0	0	0	0	0	0	0	0	0	0	0	0	0	0	0	0	0	0	0	0	0	0	0	0	0	0	0	0	0	0
snoRNA	ENSMMUG00000037335	7	107729290	107729389	-	0	0	0	0	0	0	0	0	0	0	0	0	0	0	0	0	0	0	0	0	0	0	0	0	0	0	0	0	0	0
snRNA	ENSMMUG00000027370	7	107750131	107750237	+	0	0	0	0	0	0	0	0	0	0	0	0	0	0	0	0	0	0	0	0	0	0	0	0	0	0	0	0	0	0
snoRNA	ENSMMUG00000034569	7	108258527	108258582	+	0	0	0	0	0	0	0	0	0	0	0	0	0	0	0	0	0	0	0	0	0	0	0	0	0	0	0	0	0	0
snoRNA	ENSMMUG00000035750	7	108282258	108282343	+	0	0	0	1	0	0	0	0	1	1	0	1	1	0	0	1	0	0	2	0	4	0	1	0	0	1	0	2	1	1
snRNA	ENSMMUG00000035383	7	108458810	108458916	-	0	0	0	0	0	0	0	0	0	0	0	0	0	0	0	0	0	0	0	0	0	0	0	0	0	0	0	0	0	0
snoRNA	ENSMMUG00000036000	7	110042733	110042857	+	0	0	0	0	0	0	0	0	0	0	0	0	0	0	0	0	0	0	0	0	0	0	0	0	0	0	0	0	0	0
tRNA	tRNA-Asn-GTT-12-1	7	110791133	110791189	-	0	0	0	0	0	0	0	0	0	0	0	0	0	0	0	0	0	0	0	0	0	0	0	0	0	0	0	0	0	0
snRNA	ENSMMUG00000036848	7	111388182	111388284	-	0	0	0	0	0	0	0	0	0	0	0	0	0	0	0	0	0	0	0	0	0	0	0	0	0	0	0	0	0	0
snoRNA	ENSMMUG00000036749	7	111974720	111974783	-	0	0	0	0	0	0	0	0	0	0	0	0	0	0	0	0	0	0	0	0	0	0	0	0	0	0	0	0	0	0
snRNA	ENSMMUG00000035966	7	112897940	112898035	+	0	0	0	0	0	0	0	0	0	0	0	0	0	0	0	0	0	0	0	0	0	0	0	0	0	0	0	0	0	0
snRNA	ENSMMUG00000036164	7	112963418	112963518	-	0	0	0	0	0	0	0	0	0	0	0	0	0	0	0	0	0	0	0	0	0	0	0	0	0	0	0	0	0	0
snoRNA	ENSMMUG00000036105	7	113896915	113896996	+	0	0	0	0	0	0	0	0	0	0	0	0	0	0	0	0	0	0	0	0	0	0	0	0	0	0	0	0	0	0
snoRNA	ENSMMUG00000036585	7	114292351	114292485	+	0	0	0	0	0	0	0	0	0	0	0	0	0	0	0	0	0	0	0	0	0	0	0	0	0	0	0	0	0	0
snRNA	ENSMMUG00000035480	7	114573586	114573691	+	0	0	0	0	0	0	0	0	0	0	0	0	0	0	0	0	0	0	0	0	0	0	0	0	0	0	0	0	0	0
snRNA	ENSMMUG00000037393	7	114657041	114657101	-	0	0	0	0	0	0	0	0	0	0	0	0	0	0	0	0	0	0	0	0	0	0	0	0	0	0	0	0	0	0
snRNA	ENSMMUG00000027893	7	114776250	114776356	+	0	0	0	0	0	0	0	0	0	0	0	0	0	0	0	0	0	0	0	0	0	0	0	0	0	0	0	0	0	0
tRNA	tRNA-Ser-TGA-15-1	7	116191645	116191714	+	0	0	0	0	0	0	0	0	0	0	0	0	0	0	0	0	0	0	0	0	0	0	0	0	0	0	0	0	0	0
snRNA	ENSMMUG00000037172	7	117878049	117878160	+	0	0	0	0	0	0	0	0	0	0	0	0	0	0	0	0	0	0	0	0	0	0	0	0	0	0	0	0	0	0
snRNA	ENSMMUG00000025342	7	119844199	119844305	+	0	0	0	0	0	0	0	0	0	0	0	0	0	0	0	0	0	0	0	0	0	0	0	0	0	0	0	0	0	0
snoRNA	ENSMMUG00000027928	7	120061228	120061354	+	0	0	0	0	0	0	0	0	0	0	0	0	0	0	0	0	0	0	0	0	0	0	0	0	0	0	0	0	0	0
tRNA	tRNA-Arg-CCT-4-1	7	121267332	121267404	-	0	0	0	0	0	0	0	0	0	0	0	0	0	0	0	0	0	0	0	0	0	0	0	0	0	0	0	0	0	0
snRNA	ENSMMUG00000035722	7	121307970	121308065	-	0	0	0	0	0	0	0	0	0	0	0	0	0	0	0	0	0	0	0	0	0	0	0	0	0	0	0	0	0	0
snRNA	ENSMMUG00000034204	7	124002074	124002179	+	0	0	0	0	0	0	0	0	0	0	0	0	0	0	0	0	0	0	0	0	0	0	0	0	0	0	0	0	0	0
snoRNA	ENSMMUG00000036867	7	124258016	124258088	-	0	0	0	0	0	0	0	0	0	0	0	0	0	0	0	0	0	0	0	0	0	0	0	0	0	0	0	0	0	0
snRNA	ENSMMUG00000037380	7	126620080	126620176	+	0	0	0	0	0	0	0	0	0	0	0	0	0	0	0	0	0	0	0	0	0	0	0	0	0	0	0	0	0	0
snRNA	ENSMMUG00000036035	7	126750197	126750258	+	0	0	0	0	0	0	0	0	0	0	0	0	0	0	0	0	0	0	0	0	0	0	0	0	0	0	0	0	0	0
snRNA	ENSMMUG00000027935	7	127221209	127221315	-	0	0	0	0	0	0	0	0	0	0	0	0	0	0	0	0	0	0	0	0	0	0	0	0	0	0	0	0	0	0
snRNA	ENSMMUG00000028351	7	131841417	131841523	-	0	0	0	0	0	0	0	0	0	0	0	0	0	0	0	0	0	0	0	0	0	0	0	0	0	0	0	0	0	0
snRNA	ENSMMUG00000034414	7	133464759	133464954	+	0	0	0	0	0	0	0	0	0	0	0	0	0	0	0	0	0	0	0	0	0	0	0	0	0	0	0	0	0	0
snRNA	ENSMMUG00000036204	7	133604732	133604835	+	0	0	0	0	0	0	0	0	0	0	0	0	0	0	0	0	0	0	0	0	0	0	0	0	0	0	0	0	0	0
snoRNA	ENSMMUG00000027614	7	134496971	134497041	+	0	0	0	0	0	0	0	0	0	0	0	0	0	0	0	0	0	0	0	0	0	0	0	0	0	0	0	0	0	0
snoRNA	ENSMMUG00000037103	7	136001679	136001782	-	0	0	0	0	0	0	0	0	0	0	0	0	0	0	0	0	0	0	0	0	0	0	0	0	0	0	0	0	0	0
snRNA	ENSMMUG00000037015	7	136282079	136282142	-	0	0	0	0	0	0	0	0	0	0	0	0	0	0	0	0	0	0	0	0	0	0	0	0	0	0	0	0	0	0
tRNA	tRNA-Cys-GCA-13-1	7	136333528	136333600	+	0	0	0	0	0	0	0	0	0	0	0	0	0	0	0	0	0	0	0	0	0	0	0	0	0	0	0	0	0	0
snRNA	ENSMMUG00000034824	7	136758012	136758110	-	0	0	0	0	0	0	0	0	0	0	0	0	0	0	0	0	0	0	0	0	0	0	0	0	0	0	0	0	0	0
snoRNA	ENSMMUG00000036310	7	136890849	136890952	+	0	0	0	0	0	0	0	0	0	0	0	0	0	0	0	0	0	0	0	0	0	0	0	0	0	0	0	0	0	0
snoRNA	ENSMMUG00000036963	7	137820179	137820281	+	0	0	0	0	0	0	0	0	0	0	0	0	0	0	0	0	0	0	0	0	0	0	0	0	0	0	0	0	0	0
snRNA	ENSMMUG00000025726	7	138132416	138132518	+	0	0	0	0	0	0	0	0	0	0	0	0	0	0	0	0	0	0	0	0	0	0	0	0	0	0	0	0	0	0
snRNA	ENSMMUG00000036462	7	138313949	138314050	-	0	0	0	0	0	0	0	0	0	0	0	0	0	0	0	0	0	0	0	0	0	0	0	0	0	0	0	0	0	0
snoRNA	ENSMMUG00000037196	7	140345633	140345758	-	0	0	0	0	0	0	0	0	0	0	0	0	0	0	0	0	0	0	0	0	0	0	0	0	0	0	0	0	0	0
snoRNA	ENSMMUG00000032711	7	140618429	140618581	+	0	0	0	0	0	0	0	0	0	0	0	0	0	0	0	0	0	0	0	0	0	0	0	0	0	0	0	0	0	0
tRNA	tRNA-Ser-TGA-14-1	7	141070779	141070852	+	0	0	0	0	0	0	0	0	0	0	0	0	0	0	0	0	0	0	0	0	0	0	0	0	0	0	0	0	0	0
snoRNA	ENSMMUG00000033798	7	144392974	144393117	-	0	0	0	0	0	0	0	0	0	0	0	0	0	0	1	1	0	1	0	0	0	0	0	0	0	0	0	0	0	0
snRNA	ENSMMUG00000035869	7	146241141	146241202	+	0	0	0	0	0	0	0	0	0	0	0	0	0	0	0	0	0	0	0	0	0	0	0	0	0	0	0	0	0	0
snRNA	ENSMMUG00000034089	7	146996200	146996301	+	0	0	0	0	0	0	0	0	0	0	0	0	0	0	0	0	0	0	0	0	0	0	0	0	0	0	0	0	0	0
snoRNA	ENSMMUG00000035907	7	148536339	148536438	+	0	0	0	0	0	0	0	0	0	0	0	0	0	0	0	0	0	0	0	0	0	0	0	0	0	0	0	0	0	0
snRNA	ENSMMUG00000036083	7	151174813	151174915	-	0	0	0	0	0	0	0	0	0	0	0	0	0	0	0	0	0	0	0	0	0	0	0	0	0	0	0	0	0	0
snRNA	ENSMMUG00000024074	7	152023684	152023819	+	0	0	0	0	0	0	0	0	0	0	0	0	0	0	0	0	0	0	0	0	0	0	0	0	0	0	0	0	0	0
tRNA	tRNA-Ala-AGC-10-1	7	152678268	152678341	+	0	0	0	0	0	0	0	0	0	0	0	0	0	0	0	0	0	0	0	0	0	0	0	0	0	0	0	0	0	0
snRNA	ENSMMUG00000037088	7	154309005	154309065	+	0	0	0	0	0	0	0	0	0	0	0	0	0	0	0	0	0	0	0	0	0	0	0	0	0	0	0	0	0	0
snoRNA	ENSMMUG00000033552	7	154345915	154346043	+	0	0	0	0	0	0	0	0	0	0	0	0	0	0	0	0	0	0	0	0	0	0	0	0	0	0	0	0	0	0
snRNA	ENSMMUG00000023846	7	155470285	155470389	+	0	0	0	0	0	0	0	0	0	0	0	0	0	0	0	0	0	0	0	0	0	0	0	0	0	0	0	0	0	0
tRNA	tRNA-Val-AAC-2-1	7	155847141	155847214	+	0	0	0	0	0	0	0	0	0	0	0	0	0	0	0	0	0	0	0	0	0	0	0	0	0	0	0	0	0	0
snoRNA	ENSMMUG00000035506	7	158776987	158777261	-	0	0	0	0	0	0	0	0	0	0	0	0	0	0	0	0	0	0	0	0	0	0	0	0	0	0	0	0	0	0
snoRNA	ENSMMUG00000035800	7	159560801	159560897	-	0	0	0	0	0	0	0	0	0	0	0	0	0	0	0	0	0	0	0	0	0	0	0	0	0	0	0	0	0	0
snRNA	ENSMMUG00000034149	7	159623709	159623899	+	0	0	0	0	0	0	0	0	0	0	0	0	0	0	0	0	0	0	1	0	0	0	0	0	0	0	0	0	2	0
snRNA	ENSMMUG00000024762	7	162707084	162707190	+	0	0	0	0	0	0	0	0	0	0	0	0	0	0	0	0	0	0	0	0	0	0	0	0	0	0	0	0	0	0
snRNA	ENSMMUG00000027426	7	163211925	163212087	+	0	0	0	0	0	0	0	0	0	0	0	0	0	0	0	0	0	0	0	0	0	0	0	0	0	0	0	0	0	0
snoRNA	ENSMMUG00000037107	7	164132224	164132295	+	0	0	0	0	0	0	0	0	0	0	0	0	0	0	0	0	0	0	0	0	0	0	0	0	0	0	0	0	0	0
snoRNA	ENSMMUG00000036267	7	164182234	164182310	+	0	0	0	0	0	0	0	0	0	0	0	0	0	0	0	0	0	0	0	0	0	0	0	0	0	0	0	0	0	0
snoRNA	ENSMMUG00000037307	7	164205097	164205184	+	0	0	0	0	0	0	0	0	0	0	0	0	0	0	0	0	0	0	0	0	0	0	0	0	0	0	0	0	0	0
snoRNA	ENSMMUG00000024004	7	164208331	164208402	+	0	0	0	0	0	0	0	0	0	0	0	0	0	0	0	0	0	0	0	0	0	0	0	0	0	0	0	0	0	0
snoRNA	ENSMMUG00000037444	7	164212970	164213038	+	0	0	0	0	0	0	0	0	0	0	0	0	0	0	0	0	0	0	0	0	0	0	0	0	0	0	0	0	0	0
snoRNA	ENSMMUG00000036770	7	164214115	164214186	+	0	0	0	0	0	0	0	0	0	0	0	0	0	0	0	0	0	0	0	0	0	0	0	0	0	0	0	0	0	0
snoRNA	ENSMMUG00000026753	7	164218045	164218117	+	0	0	0	0	0	0	0	0	0	0	0	0	0	0	0	0	0	0	0	0	0	0	0	0	0	0	0	0	0	0
snoRNA	ENSMMUG00000026439	7	164224627	164224701	+	0	0	0	0	0	0	0	0	0	0	0	0	0	0	0	0	0	0	0	0	0	0	0	0	0	0	0	0	0	0
snoRNA	ENSMMUG00000026414	7	164226331	164226408	+	0	0	0	0	0	0	0	0	0	0	0	0	0	0	0	0	0	0	0	0	0	0	0	0	0	0	0	0	0	0
snoRNA	ENSMMUG00000025563	7	164227690	164227764	+	0	0	0	0	0	0	0	0	0	0	0	0	0	0	0	0	0	0	0	0	0	0	0	0	0	0	0	0	0	0
snoRNA	ENSMMUG00000036293	7	164228698	164228768	+	0	0	0	0	0	0	0	0	0	0	0	0	0	0	0	0	0	0	0	0	0	0	0	0	0	0	0	0	0	0
snoRNA	ENSMMUG00000025998	7	164229258	164229334	+	0	0	0	0	0	0	0	0	0	0	0	0	0	0	0	0	0	0	0	0	0	0	0	0	0	0	0	0	0	0
snoRNA	ENSMMUG00000025693	7	164231586	164231660	+	0	0	0	0	0	0	0	0	0	0	0	0	0	0	0	0	0	0	0	0	0	0	0	0	0	0	0	0	0	0
snoRNA	ENSMMUG00000023912	7	164234111	164234182	+	0	0	0	0	0	0	0	0	0	0	0	0	0	0	0	0	0	0	0	0	0	0	0	0	0	0	0	0	0	0
snoRNA	ENSMMUG00000025008	7	164238456	164238527	+	0	0	0	0	0	0	0	0	0	0	0	0	0	0	0	0	0	0	0	0	0	0	0	0	0	0	0	0	0	0
snoRNA	ENSMMUG00000026296	7	164238854	164238928	+	0	0	0	0	0	0	0	0	0	0	0	0	0	0	0	0	0	0	0	0	0	0	0	0	0	0	0	0	0	0
snoRNA	ENSMMUG00000025714	7	164239789	164239863	+	0	0	0	0	0	0	0	0	0	0	0	0	0	0	0	0	0	0	0	0	0	0	0	0	0	0	0	0	0	0
snoRNA	ENSMMUG00000024991	7	164240720	164240794	+	0	0	0	0	0	0	0	0	0	0	0	0	0	0	0	0	0	0	0	0	0	0	0	0	0	0	0	0	0	0
snoRNA	ENSMMUG00000025793	7	164241715	164241784	+	0	0	0	0	0	0	0	0	0	0	0	0	0	0	0	0	0	0	0	0	0	0	0	0	0	0	0	0	0	0
snoRNA	ENSMMUG00000025481	7	164242590	164242684	+	0	0	0	0	0	0	0	0	0	0	0	0	0	0	0	0	0	0	0	0	0	0	0	0	0	0	0	0	0	0
snoRNA	ENSMMUG00000036017	7	164242821	164242887	-	0	0	0	0	0	0	0	0	0	0	0	0	0	0	0	0	0	0	0	0	0	0	0	0	0	0	0	0	0	0
snoRNA	ENSMMUG00000024280	7	164244194	164244267	+	0	0	0	0	0	0	0	0	0	0	0	0	0	0	0	0	0	0	0	0	0	0	0	0	0	0	0	0	0	0
snoRNA	ENSMMUG00000024302	7	164250261	164250337	+	0	0	0	0	0	0	0	0	0	0	0	0	0	0	0	0	0	0	0	0	0	0	0	0	0	0	0	0	0	0
snoRNA	ENSMMUG00000026594	7	164253257	164253328	+	0	0	0	0	0	0	0	0	0	0	0	0	0	0	0	0	0	0	0	0	0	0	0	0	0	0	0	0	0	0
snoRNA	ENSMMUG00000024547	7	164254288	164254359	+	0	0	0	0	0	0	0	0	0	0	0	0	0	0	0	0	0	0	0	0	0	0	0	0	0	0	0	0	0	0
snoRNA	ENSMMUG00000024918	7	164255341	164255415	+	0	0	0	0	0	0	0	0	0	0	0	0	0	0	0	0	0	0	0	0	0	0	0	0	0	0	0	0	0	0
snoRNA	ENSMMUG00000026441	7	164256174	164256248	+	0	0	0	0	0	0	0	0	0	0	0	0	0	0	0	0	0	0	0	0	0	0	0	0	0	0	0	0	0	0
snoRNA	ENSMMUG00000026549	7	164257090	164257163	+	0	0	0	0	0	0	0	0	0	0	0	0	0	0	0	0	0	0	0	0	0	0	0	0	0	0	0	0	0	0
snoRNA	ENSMMUG00000024532	7	164259341	164259415	+	0	0	0	0	0	0	0	0	0	0	0	0	0	0	0	0	0	0	0	0	0	0	0	0	0	0	0	0	0	0
snoRNA	ENSMMUG00000023926	7	164259909	164259981	+	0	0	0	0	0	0	0	0	0	0	0	0	0	0	0	0	0	0	0	0	0	0	0	0	0	0	0	0	0	0
snoRNA	ENSMMUG00000025608	7	164260830	164260899	+	0	0	0	0	0	0	0	0	0	0	0	0	0	0	0	0	0	0	0	0	0	0	0	0	0	0	0	0	0	0
snoRNA	ENSMMUG00000026705	7	164262037	164262111	+	0	0	0	0	0	0	0	0	0	0	0	0	0	0	0	0	0	0	0	0	0	0	0	0	0	0	0	0	0	0
snoRNA	ENSMMUG00000025665	7	164263068	164263139	+	0	0	0	0	0	0	0	0	0	0	0	0	0	0	0	0	0	0	0	0	0	0	0	0	0	0	0	0	0	0
snoRNA	ENSMMUG00000024252	7	164263700	164263774	+	0	0	0	0	0	0	0	0	0	0	0	0	0	0	0	0	0	0	0	0	0	0	0	0	0	0	0	0	0	0
snoRNA	ENSMMUG00000026065	7	164265983	164266071	+	0	0	0	0	0	0	0	0	0	0	0	0	0	0	0	0	0	0	0	0	0	0	0	0	0	0	0	0	0	0
snoRNA	ENSMMUG00000025424	7	164266963	164267037	+	0	0	0	0	0	0	0	0	0	0	0	0	0	0	0	0	0	0	0	0	0	0	0	0	0	0	0	0	0	0
snoRNA	ENSMMUG00000026556	7	164267974	164268066	+	0	0	0	0	0	0	0	0	0	0	0	0	0	0	0	0	0	0	0	0	0	0	0	0	0	0	0	0	0	0
snoRNA	ENSMMUG00000024558	7	164269273	164269344	+	0	0	0	0	0	0	0	0	0	0	0	0	0	0	0	0	0	0	0	0	0	0	0	0	0	0	0	0	0	0
snoRNA	ENSMMUG00000026211	7	164270225	164270296	+	0	0	0	0	0	0	0	0	0	0	0	0	0	0	0	0	0	0	0	0	0	0	0	0	0	0	0	0	0	0
snoRNA	ENSMMUG00000026081	7	164271813	164271884	+	0	0	0	0	0	0	0	0	0	0	0	0	0	0	0	0	0	0	0	0	0	0	0	0	0	0	0	0	0	0
snoRNA	ENSMMUG00000028125	7	164272805	164272876	+	0	0	0	0	0	0	0	0	0	0	0	0	0	0	0	0	0	0	0	0	0	0	0	0	0	0	0	0	0	0
snoRNA	ENSMMUG00000025526	7	164273948	164274018	+	0	0	0	0	0	0	0	0	0	0	0	0	0	0	0	0	0	0	0	0	0	0	0	0	0	0	0	0	0	0
snoRNA	ENSMMUG00000025795	7	164274919	164274990	+	0	0	0	0	0	0	0	0	0	0	0	0	0	0	0	0	0	0	0	0	0	0	0	0	0	0	0	0	0	0
snoRNA	ENSMMUG00000026308	7	164275880	164275951	+	0	0	0	0	0	0	0	0	0	0	0	0	0	0	0	0	0	0	0	0	0	0	0	0	0	0	0	0	0	0
snoRNA	ENSMMUG00000023952	7	164277499	164277570	+	0	0	0	0	0	0	0	0	0	0	0	0	0	0	0	0	0	0	0	0	0	0	0	0	0	0	0	0	0	0
snoRNA	ENSMMUG00000026359	7	164278800	164278874	+	0	0	0	0	0	0	0	0	0	0	0	0	0	0	0	0	0	0	0	0	0	0	0	0	0	0	0	0	0	0
snoRNA	ENSMMUG00000034542	7	164279816	164279889	+	0	0	0	0	0	0	0	0	0	0	0	0	0	0	0	0	0	0	0	0	0	0	0	0	0	0	0	0	0	0
snoRNA	ENSMMUG00000035223	7	164284031	164284103	+	0	0	0	0	0	0	0	0	0	0	0	0	0	0	0	0	0	0	0	0	0	0	0	0	0	0	0	0	0	0
snoRNA	ENSMMUG00000036232	7	164954481	164954549	+	1	2	2	0	2	1	4	1	5	2	1	5	2	2	0	2	3	2	3	2	9	0	3	1	0	2	2	2	4	1
snRNA	ENSMMUG00000025787	7	165085700	165085800	+	0	0	0	0	0	0	0	0	0	0	0	0	0	0	0	0	0	0	0	0	0	0	0	0	0	0	0	0	0	0
[truncated: 1,600 more rows]

## Sheet:  C. miRNA Raw Count
mirna_rawcounts
Name	Sequence	Name count	Identical miRNAs	1	2	3	4	5	6	7	8	9	10	11	12	13	14	15	16	17	18	19	20	21	22	23	24	25	26	27	28	29	30
mml-let-7a-2-3p	TCCTGTACTGAGCTGCCCCGAG	1	mml-miR-486-5p	1275627	1070606	1069354	907240	650988	813452	907968	996427	770770	1603017	1815542	645095	1509694	1826840	1773293	1217906	1611573	1838773	1446673	1092216	913616	1270479	1113364	1541978	2291442	1790106	1898292	1509105	1445870	1660721		40278027
mml-let-7a-3p	TAGCAGCACGTAAATATTGGCG	2	mml-miR-16-5p	1217649	1231606	826533	1579063	2588857	645066	2638093	669322	2662570	832830	651933	2356327	976466	483953	399427	675537	324596	346835	895560	1633042	710583	1508222	1397879	1456714	387573	371231	816859	1343362	1309867	435587		33373142
mml-let-7a-5p	TATTGCACTTGTCCCGGCCTGT	1	mml-miR-92a-3p	1081134	755264	743477	756160	664204	519602	956046	791546	1078719	1064549	1055316	835478	763855	1120131	1068947	777152	1149011	1106742	1246001	802436	760167	863277	930481	1322593	1708110	1329605	1613017	730278	1115112	1308934		30017344
mml-let-7b-3p	CAACGGAATCCCAAAAGCAGCTG	1	mml-miR-191-5p	551434	751756	847032	785781	644696	497707	706199	698517	601667	1089738	805185	761304	622699	1297074	780559	714794	743259	660594	1057968	968756	1128890	552672	712721	616751	771984	1001863	800463	1487324	1152023	791095		24602505
mml-let-7b-5p	CATTGCACTTGTCTCGGTCTGA	1	mml-miR-25	465564	552997	471852	555712	736970	307471	763751	427157	571812	498160	409252	679879	651719	636071	436864	553126	599760	420332	582915	674219	626933	609242	595657	624947	499561	486037	557123	663990	777851	588522		17025446
mml-let-7c-3p	AAACCGTTACCATTACTGAGTT	1	mml-miR-451	443309	389777	331746	301608	173114	369212	278971	315951	525476	253236	195505	228059	271220	150461	322863	377473	414933	431689	489353	316181	369628	184441	472010	335355	581660	713543	486107	469391	448235	413368		11053875
mml-let-7c-5p	AAAGTGCTGTTCGTGCAGGTAG	1	mml-miR-93-5p	352956	446310	300186	444056	737848	170925	865170	243152	607922	256585	201516	673659	390342	106649	173401	267720	97733	112205	324381	566991	200248	547630	465055	553941	130852	139042	274328	447045	300770	122385		10521003
mml-let-7d	TGTCAGTTTGTCAAATACCCC	1	mml-miR-223	195617	442957	304687	271268	282980	287009	234223	291705	242863	323387	239466	254732	323948	222568	237933	297737	263441	193948	414488	348917	419291	266595	422858	278072	305202	315670	373117	585881	411383	420964		9472907
mml-let-7e-3p	TGAGGTAGTAGGTTGTATAGTT	3	mml-let-7a-5p	297462	234899	131125	302950	563264	111765	574589	156275	546482	242508	160904	540424	245703	134370	119830	187172	73354	90101	245724	441226	191227	358464	396092	472881	120048	89019	254826	304599	269787	121125		7978195
mml-let-7e-5p	TCTCCCAACCCTTGTACCAGTG	1	mml-miR-150-5p	141403	217232	197735	132818	148637	107532	226148	206751	176774	298376	229665	186082	181532	205045	154673	148755	142908	153734	274284	154631	350840	131425	215487	149224	202485	213242	227329	185277	207147	178459		5745630
mml-let-7f-3p	AATGACACGATCACTCCCGTTGA	1	mml-miR-425	189546	141118	145034	110918	84761	82060	128540	183024	160399	123099	109016	81185	129019	203956	232921	218446	278932	276413	212445	148030	118398	114530	193311	184526	279588	310123	214895	193873	224784	203516		5276406
mml-let-7f-5p	TCCCTGTCCTCCAGGAGCTCACG	1	mml-miR-339-5p	168820	167820	167512	142521	103193	112277	105519	147834	90069	139997	153489	102130	210038	202126	300732	176680	163628	300476	225042	172548	183798	141785	175340	138781	214739	239546	114816	164657	135064	194573		5055550
mml-let-7g-3p	TGTAGTGTTTCCTACTTTATGGA	1	mml-miR-142-3p	92710	136896	91785	72424	46280	144659	76368	90173	106965	109476	94735	59649	112867	57184	79754	129292	177257	210346	122822	99281	148062	65427	110873	70769	168610	121980	100224	139457	269694	149391		3455410
mml-let-7g-5p	TCAGGCTCAGTCCCCTCCCGAT	1	mml-miR-484	111142	73734	71451	48910	30759	37675	79181	172242	80902	117452	114728	42854	88030	111303	205919	133945	167169	168029	152109	57710	55507	111238	119833	131495	218789	238024	165039	89153	109635	136255		3440212
mml-let-7i-3p	TAGCAGCACATCATGGTTTACA	1	mml-miR-15b-5p	89375	106454	88451	107764	249076	64052	192040	76360	215147	116302	83231	230397	80334	54400	45546	53640	45344	43713	112102	98795	117144	80777	115589	110045	64295	73339	92164	64621	74855	76305		3021657
mml-let-7i-5p	TGTAAACATCCTACACTCTCAGC	2	mml-miR-30c-5p	70551	98539	106427	68506	58101	77419	63687	92683	63982	86434	72764	51929	103956	157567	76889	102168	109394	109537	101739	117796	121970	64472	100398	70201	114410	121628	82536	177686	165301	106377		2915047
mml-miR-1-1-5p	TGAGGTAGTAGTTTGTGCTGTT	1	mml-let-7i-5p	104075	100687	64599	116983	216236	38111	189944	69797	167909	73077	59845	164240	89792	22148	45576	68104	15722	27244	75425	121479	44242	172328	128886	174627	30400	25274	88382	112502	63894	29776		2701304
mml-miR-1-2-5p	TACCACAGGGTAGAACCACGG	1	mml-miR-140-3p	61446	83911	83899	69254	46842	58073	58914	79471	51201	78395	59341	60159	83806	91059	80672	83112	102241	85794	98960	83567	111160	51522	68044	50760	80346	112151	74382	115819	117186	79480		2360967
mml-miR-1-3p	TGTAAACATCCCCGACTGGAAG	1	mml-miR-30d-5p	56098	93626	70908	57986	36203	54082	54676	70518	56204	72689	59446	61617	74128	91535	68047	69973	88633	76378	93526	77398	97773	65917	62114	50951	79103	90565	83012	89787	109284	83423		2195600
mml-miR-7	TGAGGTAGTAGATTGTATAGTT	2	mml-let-7f-5p	70785	56088	25740	86187	181021	30106	160183	36460	194798	53968	40853	160823	57016	27564	21512	41440	13890	17605	52064	95681	37980	95354	99123	97634	19701	15284	52283	89969	99427	24343		2054882
mml-miR-9-3-3p	CATAAAGTAGAAAGCACTACT	1	mml-miR-142-5p	48064	44609	47028	79524	24810	50572	39966	52413	24656	55587	48504	35161	55798	38866	120129	47577	27884	82019	128312	59050	61594	80140	71326	60021	51904	88959	50477	91586	77919	50516		1794971
mml-miR-9-3p	AGCAGCATTGTACAGGGCTATGA	2	mml-miR-103-3p	55918	60622	39323	53148	83713	26361	139518	42469	131461	35363	27442	106921	45087	22448	73462	38379	28058	30251	84940	52782	47662	81257	78871	65393	29787	46020	54928	52442	51865	28002		1713893
mml-miR-9-5p	AGCTCGGTCTGAGGCCCCTCAGT	1	mml-miR-423-3p	48935	40635	35700	24739	20621	27650	43927	39944	45364	55961	56381	33859	43852	60535	64830	58005	80807	74273	69142	35525	38183	39539	55081	60726	116024	80773	88090	40681	44906	78230		1602918
mml-miR-10a-3p	TGAGGTAGTAGGTTGTGTGGTT	1	mml-let-7b-5p	40238	30326	27564	73649	69903	18495	86021	23720	75320	42421	40950	99882	53250	15866	103096	31820	11993	30324	91375	49049	32581	50947	58607	139894	30738	42547	57360	46486	20964	39912		1535298
mml-miR-10a-5p	TGAGGTAGTAGTTTGTACAGTT	1	mml-let-7g-5p	58475	39858	19558	65397	149471	21820	102945	27583	121648	32639	25225	94722	39950	14451	15434	29077	11604	13131	31679	71808	24619	74486	63772	73035	15668	11249	33010	49106	42904	14271		1388595
mml-miR-10b-3p	TGTGCAAATCCATGCAAAACTGA	1	mml-miR-19b	30781	37931	35739	39853	27396	38997	34239	40395	38066	37765	27711	25752	40486	33614	43552	43656	53913	53894	61499	48242	73729	24970	50663	27035	45184	66741	25384	69981	88751	36745		1302664
mml-miR-10b-5p	TGAGGGGCAGAGAGCGAGACTTT	1	mml-miR-423-5p	30243	26318	21987	29705	18483	16520	38136	25922	29041	54378	44443	35646	25767	28609	42090	24776	35494	26215	56452	35828	42133	26206	34770	41112	45527	53103	50651	34105	37488	41109		1052257
mml-miR-15a-3p	TTCAAGTAATCCAGGATAGGCT	2	mml-miR-26a-5p	44176	34567	22779	33670	51418	21505	58076	25108	82494	25479	18839	49742	18548	27416	16696	25168	38680	23717	34335	35903	30487	29914	42958	41639	29410	20640	37404	30435	52774	25957		1029934
mml-miR-15a-5p	TCACAGTGAACCGGTCTCTTTT	1	mml-miR-128a-3p	21319	41817	35774	23782	19259	24939	21567	31377	18980	33333	25347	20990	41755	51720	30039	42919	41890	37014	39219	39100	46468	24459	32919	21940	36682	37857	31568	49933	51489	43052		1018507
mml-miR-15b-3p	TCCCCCAGGTGTGATTCTGATTT	1	mml-miR-361-3p	20347	20729	21599	25266	15877	13394	22919	35270	15877	35280	31734	20097	40066	46159	50095	30195	24148	39625	41271	39491	37305	44274	28779	30196	23776	32418	22045	39578	35569	25971		909350
mml-miR-15b-5p	TCACAGTGAACCGGTCTCTTT	1	mml-miR-128b-3p	19159	34811	30517	20883	16657	20815	17920	26096	16138	27269	20767	16877	36601	45067	26564	38062	37251	32783	32000	34438	38634	21558	26956	19337	32372	33443	28026	43720	46502	38160		879383
mml-miR-16-1-3p	TTCACCACCTTCTCCACCCAGC	1	mml-miR-197-3p	21037	21242	22794	16315	10939	15605	23517	21740	19210	35258	36475	16758	28543	37080	54830	26419	30348	38480	32208	24099	18287	24024	27527	33513	52202	40607	50948	30123	26695	35468		872291
mml-miR-16-2-3p	TGGAGAGAAAGGCAGTTCCTGA	1	mml-miR-185-5p	20929	19221	16254	21317	30274	10671	42492	26254	42028	28019	21865	32781	28492	16867	26311	28583	27163	19108	39270	24479	31839	22602	36467	28202	28743	36934	34685	42163	40576	31407		855996
mml-miR-16-5p	AGCTACATTGTCTGCTGGGTTTC	1	mml-miR-221-3p	33685	22474	15534	28984	48074	7588	67811	24946	65356	14157	12423	41430	20260	11887	47860	22524	13857	17856	43261	17874	14094	45444	43266	45758	17538	27453	27766	17979	12614	12839		842592
mml-miR-17-3p	CAAAGAATTCTCCTTTTGGGCT	1	mml-miR-186-5p	19805	28533	24576	16180	13118	20299	16187	24986	18922	21203	16063	12741	26971	30140	27249	32752	39768	36284	27652	28218	30599	18249	25702	19028	38230	38657	25301	39054	43759	37766		797992
mml-miR-17-5p	AGAGGTAGTAGGTTGCATAGTT	1	mml-let-7d	28572	21318	14446	23752	46085	10372	49485	16660	62410	24476	16486	47026	21606	10999	12035	20284	10829	9952	29220	37996	19530	26618	43015	55379	16865	14149	37056	31240	23906	15815		797582
mml-miR-18a-3p	GCCCCTGGGCCTATCCTAGAA	1	mml-miR-331-3p	18532	22869	19585	16238	14599	15756	15957	23685	14071	33995	31120	15278	32994	39362	29278	25946	25947	34811	22956	20027	25094	18413	19306	14766	33984	33549	33172	40336	36282	30544		758452
mml-miR-18a-5p	AAAAGCTGGGTTGAGAGGGCGA	1	mml-miR-320a	26994	14214	13266	19747	17296	7420	32488	16589	35368	29270	22706	25293	15779	10731	29647	19018	24714	17332	41004	18018	19497	15421	28446	45139	44626	48100	35855	19446	17838	39632		750894
mml-miR-18b	TTATCAGAATCTCCAGGGGTAC	1	mml-miR-361-5p	16945	25181	20636	12469	13372	12911	24813	25711	26570	25086	19547	19364	20553	31340	13320	28174	34837	22150	32907	25411	33043	18282	30408	20975	30089	26335	24844	25598	39556	27419		727846
mml-miR-19a-3p	ACCGCACTGTGGGTACTTGCTG	1	mml-miR-106b-3p	26066	18808	15567	18203	14965	10244	33794	23522	37204	21915	18165	26144	20934	18428	37382	22654	24690	21329	31849	18920	17745	31700	29165	35317	26419	30955	35709	16525	18834	23485		726637
mml-miR-19a-5p	CGAATCATTATTTGCTGCTCTA	1	mml-miR-15b-3p	15602	29754	22778	17382	7224	21917	12447	22909	8560	19555	15481	8417	25340	35465	45460	27434	28558	27865	26269	18005	24119	24741	19369	10981	27371	26819	18713	34045	34969	27226		684775
mml-miR-19b	ATCACATTGCCAGGGATTTCC	1	mml-miR-23a-3p	14743	32519	25672	10838	13544	18295	16807	26830	22705	22100	16523	15210	17132	25333	15550	23387	28342	18825	26811	19761	26615	17245	29038	17737	31461	27527	26019	26076	33334	26282		672261
mml-miR-20a-3p	CTTCTCTGTTTTGGCCATGTG	1	mml-miR-942-5p	18217	15268	13857	12778	13332	9828	14509	19352	17537	19933	16238	12562	18877	29649	19739	24377	21961	27341	16087	18709	14082	21374	17211	22983	29735	25724	24862	20741	25228	29879		591970
mml-miR-20a-5p	TAGCAGCACATAATGGTTTGTG	1	mml-miR-15a-5p	23951	19131	12747	26397	45715	11007	49915	11418	61112	11527	9126	35593	17731	4062	8279	11870	5909	7025	15244	22417	8408	19704	29207	30690	6935	7394	14180	20047	14470	6212		567423
mml-miR-20b-3p	TTCAAGTAATTCAGGATAGGT	1	mml-miR-26b-5p	15442	15375	8974	19391	55551	7802	43291	12924	52126	17443	13228	44912	15055	10327	4812	11588	6155	5546	14636	21268	10697	26822	25611	25501	6726	4478	12374	18475	21301	7243		555074
mml-miR-20b-5p	TGGAAGACTAGTGATTTTGTTGT	3	mml-miR-7	14583	17833	14124	23094	33714	11574	33020	8288	36713	12589	10031	30112	13691	4025	10439	12361	3708	6061	27129	22663	18248	18290	40975	24399	6244	8461	10858	30018	21666	8083		532994
mml-miR-21-3p	ACTGCTGAGCTAGCACTTCCCG	1	mml-miR-93-3p	14012	13196	12889	7268	5149	6056	10015	19912	8214	12101	10826	4383	13803	23064	23709	22985	21996	26821	16205	9763	8531	16908	14421	11566	22643	23835	13824	17506	16075	14058		441734
mml-miR-21-5p	AAGCTGCCAGTTGAAGAACTGT	1	mml-miR-22	11470	16088	12434	7440	8743	9814	23351	12174	24363	8288	5933	13139	10388	10296	14111	13491	16688	11695	13384	8789	9629	12062	15458	12990	12694	15547	15983	12485	10699	7015		376641
mml-miR-22	TGTAAACATCCTACACTCAGC	1	mml-miR-30b-5p	8788	13637	15890	8867	6936	12767	8258	11052	9229	9718	8731	6319	14830	13558	9771	13708	14609	15736	12392	15896	14773	8371	12913	9026	13444	15136	9494	24170	26392	11997		376408
mml-miR-23a-3p	TGTAAACATCCTTGACTGGAAG	1	mml-miR-30e-5p	10152	13201	9441	13586	8575	9954	12085	10432	12752	7840	6981	9243	11953	9164	13578	11207	16882	15457	15477	10898	13549	10075	10156	7618	10777	13060	9544	14640	24048	10259		352584
mml-miR-23a-5p	CTAGACTGAAGCTCCTTGAGG	1	mml-miR-151-3p	5468	11537	10743	5373	5474	7570	7329	12964	7379	15200	12718	7214	11595	21111	9783	11688	13711	12515	10388	13144	12820	8166	8591	7220	8836	7993	10801	16795	21067	10640		325833
mml-miR-23b-3p	AGGGCCCCCCCTCAATCCTGT	1	mml-miR-296-5p	8783	11295	10363	7553	5201	6151	10959	10374	6908	13451	12400	7176	8852	13805	17251	8811	9153	12653	12834	7056	9288	11839	10008	7553	13343	13948	9629	9422	9892	8782		304733
mml-miR-23b-5p	TCGTACCGTGAGTAATAATGCG	1	mml-miR-126	12857	10681	5756	14321	30805	6037	19736	6126	25450	5863	4911	20565	5592	2732	2441	3159	1753	2267	9967	12593	4722	16818	13567	9848	1685	1292	4874	8069	8348	1595		274430
mml-miR-24-3p	TCTCACACAGAAATCGCACCCGT	1	mml-miR-342-3p	5512	8458	8985	4289	5756	4124	11278	10168	11150	11633	10814	11735	7187	8490	4442	8083	8278	5648	14284	6331	25156	3729	10460	6013	7472	13422	6917	6386	9566	7172		262938
mml-miR-24-5p	ATCACATTGCCAGGGATTACC	1	mml-miR-23b-3p	6121	9570	8908	5364	4810	5969	5503	10596	6659	7829	6126	4825	6082	9139	7579	8153	10195	7215	11950	6906	10083	6924	10133	6284	8971	11103	7747	8043	10224	7551		236562
mml-miR-25	TGGCTCAGTTCAGCAGGAACAG	2	mml-miR-24-3p	5533	9668	6290	4508	8532	5207	11425	8242	10908	6421	4973	9004	7129	5377	7691	7696	8280	5362	8410	6690	8015	10229	9797	6794	7398	9157	7082	7647	7922	6626		228013
mml-miR-26a-1-3p	GAATGTTGCTCGGTGAACCCCT	1	mml-miR-409-3p	5792	12753	12291	6999	5006	7782	6794	6349	4832	5519	4231	8974	7380	6886	5263	6722	6379	3887	12193	8205	11760	10585	11816	5968	3689	4595	5483	9225	10348	3820		221526
mml-miR-26a-2-3p	TCGTGTCTTGTGTTGCAGCCGG	1	mml-miR-187-3p	6176	10369	9332	7469	8020	5130	6335	5705	4223	5085	4376	7563	9211	2170	4654	5763	4860	2104	12276	7923	8958	7148	12295	9107	4273	6699	7355	7149	10274	4892		206894
mml-miR-26a-5p	TCAGTGCACTACAGAACTTTGT	1	mml-miR-148a-3p	3453	7781	6615	7415	5832	5755	8050	4501	7467	4206	4242	7654	5194	2062	6520	3900	4647	3650	16680	6860	9913	8007	10064	6201	4350	8425	5766	10474	14566	5810		206060
mml-miR-26b-3p	CCTCCCACACCCAAGGCTTGCA	1	mml-miR-532-3p	5370	5745	5910	5358	4159	3971	5145	5862	3518	8859	9103	4572	8292	10689	10815	6070	5723	7103	7540	6341	6836	7786	5650	5779	7044	6985	7392	7917	6428	6531		198493
mml-miR-26b-5p	TACAGTACTGTGATAACTGAAG	2	mml-miR-101-3p	6628	5637	3457	11984	14927	4135	17845	3770	19191	4145	4125	16197	6885	1057	5341	3945	1737	3598	7798	5156	3863	5334	8185	7593	1501	2598	3777	6488	6039	1580		194516
mml-miR-27a-3p	TGAGCGCCTCGACGACAGAGCCG	1	mml-miR-339-3p	7550	6827	5548	5821	3844	4091	4599	5429	3949	4068	3626	3451	5542	6378	11348	6036	8496	9329	9137	6293	7326	5545	6508	5163	9252	11637	4244	4575	3957	7255		186824
mml-miR-27a-5p	ACTGCCCTAAGTGCTCCTTCTGGC	1	mml-miR-18a-3p	5300	3379	3412	2279	1913	2146	3426	5627	4747	4487	4558	2037	4564	6549	8766	7284	9688	9082	6376	2999	2919	4495	6536	7575	14902	11126	10019	4918	5529	8146		174784
mml-miR-27b-3p	TTATGGTTTGCCTGGGACTGAG	1	mml-miR-584-5p	3352	5168	3840	3505	5003	2078	12371	6977	11378	5528	4919	9808	4384	4151	8413	3897	2500	3745	7904	5474	3788	11668	7412	9329	4382	6736	4345	3245	2699	3983		171982
mml-miR-27b-5p	TCAGTGCATCACAGAACTTTGT	1	mml-miR-148b-3p	3124	4471	3713	4120	4825	3760	5981	3500	6360	4531	3286	9025	5909	2788	4056	5673	5018	4161	10222	6516	11566	2888	8386	5985	5048	8010	5805	7927	6778	7192		170624
mml-miR-28-3p	TCCCTGAGACCCTAACTTGTGA	2	mml-miR-125b-5p	3613	3161	3253	4407	3981	1562	4011	4331	2893	3916	3395	2768	2644	6236	4517	2375	2341	5129	10917	13252	9939	18734	8846	10110	3586	3909	3206	6393	7052	3779		164256
mml-miR-28-5p	CTGTGCGTGTGACAGCGGCTGA	1	mml-miR-210-3p	4240	6454	4830	5629	8754	3204	9819	4515	8036	4053	4032	7766	5858	2369	6074	3655	2920	3056	5465	10123	4062	10102	5697	10815	1927	3263	2868	4152	3301	1789		158828
mml-miR-29a-3p	TAGCTTATCAGACTGATGTTGA	1	mml-miR-21-5p	5778	4802	2855	5678	6599	3119	8357	2524	15891	2647	2322	7538	3571	1230	3092	4048	4025	3407	7633	3877	3503	3821	7567	5141	3523	3336	3839	4151	6357	3125		143356
mml-miR-29a-5p	TAGCACCATTTGAAATCGGTTA	1	mml-miR-29c-3p	4581	4050	2693	7591	7161	2994	11813	2670	10741	2525	2577	9743	6016	907	3720	3210	2178	2522	5257	5694	4184	4041	5539	6036	1789	3150	3577	5702	5144	2264		140069
mml-miR-29b-1-5p	CTGACCTATGAATTGACAGCC	1	mml-miR-192-5p	2863	3615	3414	2874	1635	3347	1831	3760	2550	4070	3592	1910	6041	4526	4311	6380	7065	6218	5904	4205	7238	2323	4638	2403	4246	6348	4370	9962	10295	4956		136890
mml-miR-29b-2-5p	TAGTGCAATATTGCTTATAGGGT	1	mml-miR-454-3p	4707	3912	2616	5099	8749	1906	9152	3084	9275	3021	2239	5815	3517	1637	1897	3178	1037	1527	3438	5923	1930	7660	6426	5755	1553	1294	2729	5477	5294	1431		121278
mml-miR-29b-3p	TTTCCGGCTCGCGTGGGTGTGT	1	mml-miR-1180-3p	3514	2312	1786	2354	2912	1351	4972	2832	5314	4811	4342	3746	2976	2045	4364	3296	3567	3035	5645	2471	2640	3762	4914	6469	5642	4140	6834	2306	2670	4398		111420
mml-miR-29c-3p	TCCCTGAGACCCTTTAACCTGTGA	1	mml-miR-125a-5p	3237	3394	3638	3262	2629	2233	2448	3047	2005	3959	3197	2593	2477	5227	3701	1991	2004	4190	7427	3494	6843	4157	5864	2844	3431	3459	3625	5150	5267	3253		110046
mml-miR-29c-5p	GTCATACACGGCTCTCCTCTCT	1	mml-miR-485-3p	2677	4372	4441	2838	2064	3019	2207	2103	1466	2918	2626	2613	3756	3376	2495	2698	2239	2276	5792	3640	4300	4666	5327	3414	1825	1604	2792	3804	3465	1691		92504
mml-miR-30a-3p	CAAAGTGCTTACAGTGCAGGTAGT	1	mml-miR-17-5p	2955	3085	2635	3392	6235	1674	6664	2307	6525	2106	1665	4683	3232	1112	1792	2192	1010	1255	2563	3929	1595	4357	4009	4487	1258	1629	2046	3187	2042	1066		86687
mml-miR-30a-5p	TTTCAGTCGGATGTTTACAGC	1	mml-miR-30e-3p	2094	3076	2731	2404	1965	2221	2480	2200	2140	2473	2168	2046	3077	3675	2979	2942	2728	3492	2891	2908	3345	2441	2969	1707	3216	2994	2038	3667	6163	3547		84777
mml-miR-30b-3p	TGTAACAGCAACTCCATGTGGA	2	mml-miR-194-5p	1958	2437	1992	1976	2736	1871	2919	1972	3477	1921	1398	2424	3047	2549	1502	3036	3704	2475	2706	2518	3652	1684	3001	1845	2018	2134	3104	4699	6215	2187		79157
mml-miR-30b-5p	TTCACAGTGGCTAAGTTCTGC	1	mml-miR-27b-3p	1992	3081	2161	2731	3556	2154	3580	2119	3821	2427	1852	3835	2261	1642	1634	2172	2194	1603	2966	2493	3012	2904	3223	1863	1871	1699	1958	2552	3944	2454		75754
mml-miR-30c-1-3p	AATGGCGCCACTAGGGTTGTG	1	mml-miR-652	2734	2116	1631	1896	2411	1017	3472	2040	4177	1868	1628	2266	1835	1801	4114	2058	2156	2476	3112	2335	1420	3411	2918	4356	3291	3909	3293	1553	1469	2176		74939
mml-miR-30c-2-3p	TTAATGCTAATCGTGATAGGGGT	1	mml-miR-155	2738	2182	1747	2455	3855	960	3889	1535	4849	2190	1405	3875	1460	1250	1105	1840	983	830	2927	2378	2360	1971	4193	3150	1023	1148	3047	3504	4490	934		70273
mml-miR-30c-5p	AGCAGCATTGTACAGGGCTATCA	1	mml-miR-107-3p	2452	2361	1664	2251	3055	1178	5270	1983	4908	1421	1063	3824	1773	959	3718	1656	1443	1521	3971	1951	2383	3177	3144	2293	1358	2220	2000	1772	1932	1268		69969
mml-miR-30d-3p	TAGCACCATTTGAAATCAGTGTT	2	mml-miR-29b-3p	2035	2002	1566	2771	2710	1625	2722	1147	3125	1530	1186	2709	2023	1748	1355	1915	1887	2186	2105	3927	2815	2070	2162	2432	2086	2066	1893	3987	5286	2481		69552
mml-miR-30d-5p	GAGAGATCAGAGGCGCAGAGT	1	mml-miR-6529-5p	1313	1337	1719	1420	1192	847	1709	1440	1635	2455	1853	1774	2059	2182	2539	2442	3068	2051	3862	2275	2794	1107	2686	3001	3210	3530	3062	2838	3471	3196		68067
mml-miR-30e-3p	TCACCAGCCCTGTGTTCCCTAG	1	mml-miR-1226	1122	1297	1640	1306	991	1238	1569	1624	977	2959	3200	1184	3030	3207	3018	2121	1904	2451	2730	2204	2004	2397	2115	2224	2916	2683	2811	3095	2952	2839		65808
mml-miR-30e-5p	TATGTCTGCTGACCATCACCTT	1	mml-miR-654-3p	1822	5633	4800	1202	718	3405	1573	2021	1580	1144	1001	1576	2386	1558	1287	2631	2938	1676	2925	2195	2880	2450	3486	1411	1442	1256	1726	2462	3334	1216		65734
mml-miR-31-3p	AGCTACATCTGGCTACTGGGT	1	mml-miR-222-3p	2758	1615	1186	2229	3295	730	3522	2086	3625	1184	1072	1964	1518	2224	3849	1606	1815	2240	2096	1956	1397	4106	2023	2955	2343	3220	2283	1524	1568	1668		65657
mml-miR-31-5p	TGAGAACTGAATTCCATGGGTT	1	mml-miR-146a-5p	1883	2045	1428	2007	4211	989	4197	1500	5558	1901	1694	3967	1804	1230	1086	1531	1469	1153	3212	1751	3035	1215	2514	1612	1280	1878	1593	1807	2098	1327		62975
mml-miR-32-3p	TAGGTAGTTTCATGTTGTTGG	2	mml-miR-196a-5p	1445	3591	2390	1409	2840	1698	3750	1875	4130	2812	2034	3382	1055	1980	1475	898	318	1324	1966	2886	1331	2380	3554	3088	531	285	1250	1652	1501	519		59349
mml-miR-32-5p	CCACCTCCCCTGCAAACGTCC	1	mml-miR-1306-5p	1273	1490	1430	1568	1063	1010	1396	1107	819	3357	3598	1455	1998	2782	2581	1660	1630	1671	2206	2002	2001	1989	1277	1750	2349	2159	2828	2586	2379	2324		57738
mml-miR-33a	TCCGGTTCTCAGGGCTCCACC	1	mml-miR-671-3p	1602	1666	1570	964	784	973	1526	1349	1273	1762	1893	1263	1909	2840	2821	1985	2015	3025	2387	1414	1613	1796	1846	1772	2789	2702	2649	2198	2035	2405		56826
mml-miR-33b-3p	CGCATCCCCTAGGGCATTGGTGT	1	mml-miR-324-5p	1274	1458	1174	1352	1060	958	1363	1566	955	1585	1194	1102	1861	2899	2296	1623	1879	2373	2017	2416	2143	2431	1379	1421	2253	2680	1803	2466	2901	2292		54174
mml-miR-33b-5p	TATTGCACTCGTCCCGGCCTCC	1	mml-miR-92b-3p	813	1548	1697	494	335	1031	813	895	1122	1127	1290	560	1350	2996	2801	1798	1657	3253	1409	1222	869	1524	1297	2704	3461	2566	4386	2273	3371	2356		53018
mml-miR-34a-3p	CACTAGATTGTGAGCTCCTGGA	1	mml-miR-28-3p	969	2075	1578	950	1235	1251	1285	1383	1344	1921	1495	1790	1600	2942	1039	1341	1543	1468	2133	1826	3313	1573	1969	1227	1929	1649	1900	1958	2850	2278		51814
mml-miR-34a-5p	CTAGCACCATCTGAAATCGGTT	1	mml-miR-29a-3p	1317	2088	1490	1426	1776	1188	2876	1392	2942	1652	1250	3487	1708	574	675	1184	1315	834	2404	1363	4183	522	2137	1166	1525	2121	1701	1410	1977	1936		51619
mml-miR-34b	AGTGGGGAACCCTTCCATGAGG	1	mml-miR-491-5p	1365	1504	1316	849	635	762	1516	1797	1389	1573	1478	967	1370	1796	2416	1781	2876	1920	2580	1176	1463	1812	1821	1596	2971	2949	1766	1134	1470	1844		49892
mml-miR-34c-3p	ACTGCCCCAGGTGCTGCTGG	1	mml-miR-324-3p	1096	1189	1028	879	598	788	1364	1438	963	2045	2103	1087	1725	1907	2540	1469	1700	1855	2082	1392	1677	1828	1457	1452	2051	2434	2049	1855	1468	1750		47269
mml-miR-34c-5p	CACCTTGCGCTACTCAGGTCTG	1	mml-miR-3200-3p	761	1446	1231	856	929	909	1444	1345	1225	1898	1527	1544	2200	1504	1593	1675	1927	1318	1914	1214	1811	1058	1359	927	2295	2129	2211	1956	2142	2732		47080
mml-miR-92a-3p	TTATAAAGCAATGAGACTGATT	1	mml-miR-340-5p	1043	1430	934	2302	1367	933	1578	1131	1988	1060	1240	1844	1375	246	1315	1019	733	816	5187	880	2271	877	2397	1320	614	1617	847	1105	1170	772		41411
mml-miR-92a-5p	TGTGCAAATCTATGCAAAACTGA	1	mml-miR-19a-3p	1090	1128	946	1975	1606	1109	1938	1000	2026	1009	861	1330	1303	463	1430	1011	913	1379	2356	1157	1342	1030	1747	1429	824	1221	773	1764	2567	580		39307
mml-miR-92b-3p	TGAGGTAGTAGGTTGTATGGTT	1	mml-let-7c-5p	1141	919	566	1195	2045	481	2443	752	2413	1043	862	2401	1120	585	969	756	351	507	1760	2122	1196	1957	2135	2883	781	684	1311	1268	1108	674		38428
mml-miR-92b-5p	CCAATATTACTGTGCTGCTTCA	1	mml-miR-16-2-3p	614	674	864	1183	246	566	515	1687	380	418	526	309	1062	1140	8217	1182	879	2498	3278	451	731	1866	1030	769	1178	3043	557	866	915	716		38360
mml-miR-93-3p	CTTGGCACCTAGCAAGCACTCA	1	mml-miR-1271-5p	940	1631	1649	584	464	1012	1570	1018	1551	851	706	1235	1444	2463	1950	2245	2239	2246	816	980	561	1160	726	1014	1145	1122	621	607	729	870		36149
mml-miR-93-5p	TAGCAGCGGGAACAGTTCTGCAG	1	mml-miR-503-5p	987	833	567	1352	1810	435	2795	651	2477	829	563	2718	1533	752	894	1145	930	642	1233	1936	1319	1736	1277	1742	932	1114	379	381	371	1218		35551
mml-miR-95-3p	CATGCCTTGAGTGTAGGACCGT	1	mml-miR-532-5p	833	1398	956	1213	1424	632	1501	1309	1137	998	870	1258	1238	1179	1785	1221	1109	1050	1806	950	1811	1659	1338	770	786	1203	758	1184	1219	794		35389
mml-miR-95-5p	TTAGGGCCCTGGCTCCATCTCCT	1	mml-miR-1296-5p	579	1319	1016	298	370	909	1039	1160	998	2114	1831	977	1430	849	737	1377	1791	1045	1591	599	1297	522	1337	679	1612	1169	2026	1323	1231	1390		34615
mml-miR-96	ACTGGACTTGGAGTCAGAAGG	1	mml-miR-378a	947	871	716	956	978	374	2538	856	3078	591	576	1762	657	599	1985	766	980	778	1816	880	761	1620	1358	1654	838	1372	1326	1005	1205	702		34545
mml-miR-98	AACATTCAACGCTGTCGGTGAGT	2	mml-miR-181a-5p	1042	780	582	973	1194	315	2073	995	2224	948	821	1886	577	531	2023	690	647	790	2716	522	941	788	1611	1644	1185	1945	1820	680	433	1074		34450
mml-miR-99a-3p	ACGCCCTTCCCCCCCTTCTTCA	1	mml-miR-1249	516	903	856	291	177	595	315	602	295	863	1064	218	2133	1356	2023	1651	3786	1434	1220	713	559	897	874	1062	2730	2047	650	344	369	1335		31878
mml-miR-99a-5p	TAAAGTGCTTATAGTGCAGGTA	1	mml-miR-20a-5p	1891	941	694	1469	2166	512	2868	716	3711	489	453	1464	860	236	673	739	361	614	766	1166	268	1431	1289	2106	464	511	855	982	871	284		31850
mml-miR-99b-3p	ATATAATACAACCTGCTAAGTG	1	mml-miR-374b-5p	1337	1451	997	1007	1358	795	1955	810	2534	778	535	1107	645	899	369	862	746	752	783	1048	638	1146	1385	995	776	550	910	1024	1826	504		30522
mml-miR-99b-5p	TGTAAACATCCTCGACTGGAAG	1	mml-miR-30a-5p	324	1590	1068	380	247	1011	976	824	873	865	636	868	516	233	127	433	579	242	1633	1346	2135	867	1125	603	518	518	1804	2274	3880	516		29011
mml-miR-100-3p	TCCGTCTCAGTTACTTTATAGCC	1	mml-miR-340-3p	762	1061	1029	846	689	941	515	1030	672	1107	987	468	1060	1208	772	916	641	1328	1100	1226	1175	837	1052	702	980	944	735	1428	1322	1029		28562
mml-miR-100-5p	AGTGTACTTCCTGAGGCCTCT	1	mml-miR-7180-5p	516	614	650	273	203	384	542	935	644	658	699	302	692	1086	1144	1255	1739	1323	1050	594	492	751	1027	1034	2359	1942	1448	924	1057	1473		27810
mml-miR-101-1-5p	TGGCAGTGTCTTAGCTGGTTGT	1	mml-miR-34a-5p	489	1079	412	643	2936	391	2019	751	2335	656	443	2092	603	214	289	555	312	195	828	709	536	1002	1484	890	607	566	1156	1012	561	622		26387
mml-miR-101-2-5p	CTATACAATCTACTGTCTTTCC	1	mml-let-7a-3p	524	946	1017	537	199	1054	291	672	224	811	649	246	1076	470	916	1170	881	1545	1168	610	1151	452	915	402	1161	1166	614	1957	1730	1181		25735
mml-miR-101-3p	TACAGTATAGATGATGTACT	1	mml-miR-144	790	689	612	1938	766	1060	1386	721	1334	757	905	1106	715	142	934	324	361	974	1628	519	573	666	708	864	495	877	595	609	794	363		24205
mml-miR-103-3p	TGGTTTACCGTCCCACATACAT	1	mml-miR-299-5p	762	1709	1562	510	344	1002	604	739	661	511	374	594	727	641	663	821	839	721	1267	706	1080	845	1514	622	625	562	793	860	930	448		24036
mml-miR-103-5p	TTATAATACAACCTGATAAGTG	1	mml-miR-374a-5p	1047	892	494	949	1400	747	1253	413	3060	546	481	1435	500	214	273	504	386	538	744	787	526	542	1122	987	387	294	729	792	1382	288		23712
mml-miR-105-3p	ATCAACAGACATTAATTGGGCGC	1	mml-miR-421	538	652	600	685	937	453	841	486	961	664	482	769	621	785	520	700	600	551	1009	931	1211	532	949	668	668	965	599	1105	1273	827		22582
mml-miR-105-5p	TCGAGGAGCTCACAGTCTAGT	1	mml-miR-151-5p	397	808	704	474	591	581	754	936	662	960	708	653	743	871	880	708	744	724	914	903	877	622	799	623	629	696	737	1044	1065	624		22431
mml-miR-106a-3p	TGAGGTAGTAAGTTGTATTGTT	1	mml-miR-98	802	605	316	734	1539	292	1554	498	2468	581	481	1467	600	314	222	501	216	208	633	965	371	1154	1333	1119	278	177	648	820	977	254		22127
mml-miR-106a-5p	GCTGCGCTTGGATTTCGTCCCC	1	mml-miR-191-3p	397	945	910	379	413	626	771	953	548	961	963	694	963	639	847	723	739	509	1137	469	876	734	890	416	717	719	789	822	856	694		22099
mml-miR-106b-3p	TGGAGTGTGACAATGGTGTTTG	1	mml-miR-122a-5p	3089	99	46	124	5916	245	909	307	1663	816	1008	760	194	72	114	277	479	451	1635	601	199	156	327	744	284	148	357	137	116	138		21411
mml-miR-106b-5p	TAAAGTGCTGACAGTGCAGAT	1	mml-miR-106b-5p	938	688	545	822	1495	380	1827	464	2160	390	335	1061	854	148	432	535	249	334	479	848	248	707	867	1343	413	495	604	663	445	283		21052
mml-miR-107-3p	CCCAATACACGGTCGACCTCT	1	mml-miR-323b-3p	612	1234	1279	645	430	682	459	777	359	503	421	551	572	630	638	622	573	375	1197	778	837	1272	1175	659	376	526	609	962	910	327		20990
mml-miR-107-5p	TTCACAGTGGCTAAGTTCCGCC	1	mml-miR-27a-3p	387	1034	603	511	422	805	705	650	791	615	467	724	769	226	622	566	741	547	935	734	1085	604	756	466	817	799	658	852	881	874		20646
mml-miR-122a-3p	TGAGTCTGTAAGAAAAGAGGAG	1	mml-miR-627-5p	544	609	546	821	1198	398	744	416	921	740	491	879	651	532	417	639	430	337	869	938	1026	445	825	658	402	547	456	983	928	642		20032
mml-miR-122a-5p	CAGTGGTTTTACCCTATGGTAG	1	mml-miR-140-5p	621	775	424	838	778	522	1293	542	1144	384	382	888	901	252	744	680	505	645	714	549	567	856	782	544	390	478	452	756	858	465		19729
mml-miR-124a-3p	CGATAACACCCAAGTCCGAAT	1	mml-miR-7204-3p	428	578	679	357	594	393	403	763	456	591	536	314	544	766	953	749	661	827	739	465	477	541	590	479	748	1030	603	823	738	617		18442
mml-miR-124a-5p	TCTTCATGCAGGAACCACATTT	1	mml-miR-7186-3p	514	692	710	506	368	567	411	360	429	379	296	325	800	793	566	883	912	911	779	849	860	566	644	460	532	551	241	678	770	548		17900
mml-miR-125a-3p	CAGCAGCAATTCATGTTTTGAA	1	mml-miR-424-5p	585	435	338	1047	1033	378	1184	276	1447	305	210	1119	731	176	697	570	456	475	769	685	653	573	718	619	423	756	157	223	154	502		17694
mml-miR-125a-5p	CCGATTTCTCCTGGTGTTCAG	1	mml-miR-29c-5p	435	541	444	240	255	324	391	618	445	440	458	273	690	812	614	754	944	854	598	528	586	480	605	442	947	790	601	827	841	709		17486
mml-miR-125b-1-3p	CCTGTTCTCCATTACTTGGCT	1	mml-miR-26b-3p	367	793	612	286	376	560	326	602	400	828	666	399	664	766	394	566	534	629	461	545	548	424	499	422	755	563	750	754	692	780		16961
mml-miR-125b-2-3p	AAAAGTGCTTACAGTGCAGGTAGC	1	mml-miR-106a-5p	592	549	427	675	1308	314	1417	445	1312	424	310	916	662	167	281	412	179	212	461	804	267	819	802	929	265	337	372	614	415	182		16869
mml-miR-125b-5p	TGATATGTTTGATATATTAGGT	1	mml-miR-190a-5p	709	579	363	1025	1324	419	139	43	243	39	40	141	74	167	722	63	30	383	2470	85	1280	146	3847	128	191	213	351	733	586	142		16675
mml-miR-126	CGTCAACACTTGCTGGTTTCCT	1	mml-miR-505-3p	308	664	631	303	586	548	421	306	466	613	487	502	746	621	356	559	487	397	826	384	768	224	799	342	887	552	839	565	452	1006		16645
mml-miR-127-3p	TACCCTGTAGATCCGAATTTGTG	1	mml-miR-10a-5p	364	782	663	282	207	451	358	633	560	528	456	331	463	569	329	523	552	519	691	544	584	482	625	448	631	636	546	685	981	521		15944
mml-miR-127-5p	CACCCGTAGAACCGACCTTGCG	1	mml-miR-99b-5p	408	587	574	419	338	336	363	361	257	400	292	434	327	644	513	303	275	453	1103	561	1164	443	987	333	546	630	530	748	785	480		15594
mml-miR-128a-3p	ACTCTTTCCCTGTTGCACTACT	1	mml-miR-130b-5p	526	427	423	362	269	283	355	602	328	529	450	283	515	514	642	577	462	674	533	452	303	654	546	793	928	886	656	440	445	697		15554
mml-miR-128a-5p	GAAGTTGTTCGTGGTGGATTCG	1	mml-miR-382-5p	516	661	514	576	915	335	1061	235	943	253	162	1471	378	113	249	266	168	104	791	515	450	605	1002	702	97	140	346	445	335	136		14484
mml-miR-128b-3p	ATTCTAATTTCTCCACATCTTT	1	mml-miR-576-5p	369	340	378	285	135	292	207	657	274	501	491	151	409	297	555	561	405	787	590	330	405	316	540	312	488	666	559	1116	1013	437		13866
mml-miR-128b-5p	GGAGTATTGTTTCCGCTGCCAGG	1	mml-miR-503-3p	385	372	270	450	547	182	757	286	616	342	282	632	510	592	423	469	476	341	581	706	484	802	540	670	501	450	232	195	224	516		13833
mml-miR-129-1-3p	CTATACAACCTACTGCCTTCCC	1	mml-let-7b-3p	210	394	484	211	33	443	96	473	67	490	452	122	661	757	705	598	470	737	739	270	789	225	492	212	729	764	443	610	368	751		13795
mml-miR-129-2-3p	AACATTCATTGCTGTCGGTGGGTT	2	mml-miR-181b-5p	485	290	223	316	505	112	909	406	982	296	296	680	253	238	752	356	281	392	704	363	343	414	719	909	452	626	551	260	198	326		13637
mml-miR-129-5p	CTGTGGTTCCTGTATGAAGACA	1	mml-miR-7186-5p	530	477	362	431	589	274	723	306	991	325	292	723	348	424	435	371	351	416	616	435	466	509	532	606	373	412	405	213	271	308		13514
mml-miR-130a-3p	TTCGAGGCTACAATGAGATGTG	1	mml-miR-1304	388	489	450	466	773	220	760	441	813	545	413	686	186	438	478	211	127	290	321	382	230	366	414	474	194	303	390	592	620	235		12695
mml-miR-130a-5p	ATCCCACCACTGCCACCA	1	mml-miR-1260b	346	297	336	221	133	218	336	432	347	465	436	272	299	465	778	332	415	521	454	287	224	372	389	459	808	647	560	342	355	468		12014
mml-miR-130b-3p	GGCTACAACACAGGACCCGGG	1	mml-miR-187-5p	306	837	880	449	403	542	105	316	89	518	473	112	487	167	143	427	406	109	765	371	680	319	541	351	420	554	231	256	250	500		12007
mml-miR-130b-5p	TGAAACATACACGGGAAACCTC	1	mml-miR-494-3p	358	819	844	311	255	441	332	436	351	226	161	314	310	406	276	392	390	221	635	506	573	507	728	314	227	310	199	438	478	214		11972
mml-miR-132-3p	TACCCATTGCATATCGGAGTTG	1	mml-miR-660-5p	351	416	327	458	409	284	543	329	602	293	254	451	449	139	481	429	341	336	632	389	478	277	560	336	270	437	307	465	521	369		11933
mml-miR-132-5p	TCTCTGACACACGCCCTCCTGC	1	mml-miR-7205-3p	318	369	371	247	201	244	296	187	209	401	401	210	446	470	572	500	432	518	462	348	244	434	378	577	125	108	1088	771	892	108		11927
mml-miR-133a	CTAGGTATGGTCCCAGGGATCC	1	mml-miR-331-5p	375	263	205	455	528	188	562	270	584	258	278	528	349	391	547	309	400	277	390	287	286	510	323	382	375	389	476	299	383	349		11216
mml-miR-133b-3p	TAGGTTATCCGTGTTGCCTTCG	1	mml-miR-154-5p	327	693	607	202	164	462	302	287	275	211	151	304	516	279	174	425	585	311	442	436	493	356	624	310	305	221	389	473	588	285		11197
mml-miR-133b-5p	AAAAGCTGGGTTGAGAGGGCAA	1	mml-miR-320b	372	178	162	266	245	102	468	216	562	332	283	376	246	152	429	294	350	270	615	236	258	219	469	684	688	694	578	279	233	574		10830
mml-miR-133c-3p	CTATACAATCTATTGCCTTCCC	1	mml-let-7f-3p	156	334	411	156	39	371	117	383	63	278	245	63	452	329	386	428	431	459	443	202	393	187	383	128	470	528	294	775	604	395		9903
mml-miR-133c-5p	TCTTGGAGTAGGTCATTGGGTGG	1	mml-miR-432-5p	244	332	302	411	408	253	537	160	456	259	227	849	330	79	235	176	124	94	609	384	305	422	606	530	116	116	297	322	247	166		9596
mml-miR-133d-3p	CACATTACACGGTCGACCTCT	1	mml-miR-323a-3p	251	534	505	248	193	372	232	278	244	264	211	375	265	265	167	300	286	159	520	374	415	355	602	337	222	205	339	351	424	206		9499
mml-miR-133d-5p	ACAGTAGTCTGCACATTGGTTA	1	mml-miR-199a-3p	389	230	145	177	603	133	477	192	1193	310	363	562	181	76	76	122	153	182	920	288	155	373	347	297	110	62	385	291	298	45		9135
mml-miR-134-3p	TGTGACTGGTTGACCAGAGGGG	1	mml-miR-134-5p	256	459	425	295	413	240	464	294	350	208	161	551	254	150	206	205	187	95	381	337	321	612	502	367	137	131	238	272	248	160		8919
mml-miR-134-5p	TTTGGCAATGGTAGAACTCACA	1	mml-miR-182	177	204	209	129	153	148	469	273	565	315	265	515	202	387	219	207	210	223	430	378	346	332	298	340	116	196	292	444	443	209		8694
mml-miR-135a-1-3p	TATACAAGGGCAAGCTCTCTGT	1	mml-miR-381-3p	257	692	524	169	147	416	306	231	293	129	111	267	322	142	143	262	544	245	378	270	333	281	416	169	157	172	224	281	543	170		8594
mml-miR-135a-2-3p	CAGTGCAATGATGAAAGGGCAT	1	mml-miR-130b-3p	320	249	233	386	649	107	536	200	418	244	162	456	207	160	150	219	132	113	231	585	229	397	280	526	154	207	188	313	297	199		8547
mml-miR-135a-5p	AACCCGTAGATCCGATCTTGTG	1	mml-miR-99a-5p	239	144	136	166	137	77	173	229	290	177	139	123	81	191	190	169	233	268	682	577	507	471	616	625	381	348	229	234	326	336		8494
mml-miR-135b-3p	TGGGAGAGGGTTGTTTACTCC	1	mml-miR-30c-1-3p	218	255	201	242	268	155	356	285	230	290	256	295	336	281	512	240	220	220	398	215	384	379	321	242	250	320	280	305	214	243		8411
mml-miR-135b-5p	GCCTGCTGGGGTGGAACCTGGT	1	mml-miR-370-3p	266	421	320	347	451	223	500	147	320	231	200	727	220	104	167	105	131	75	457	231	399	437	381	301	105	123	226	159	228	110		8112
mml-miR-136	AAAACGTGAGGCGCTGCTATA	1	mml-miR-424-3p	271	156	118	282	326	92	477	148	531	191	138	483	275	185	350	262	230	175	436	271	321	274	333	416	331	355	166	74	65	328		8060
mml-miR-137-3p	TGAGGTAGGAGGTTGTATAGTT	1	mml-let-7e-5p	250	252	156	272	428	135	529	139	523	257	148	549	231	101	115	170	75	94	320	423	210	288	376	474	126	114	305	320	217	139		7736
mml-miR-137-5p	CCTGTGCCTTTTACCTCTTTAA	1	mml-miR-6529-3p	154	212	251	142	121	143	156	314	130	255	200	103	351	508	358	325	202	365	251	244	230	231	244	189	306	361	261	390	308	271		7576
mml-miR-138-3p	TGATATGTTTGATATTGGGTT	1	mml-miR-190b	426	241	133	587	949	103	285	203	292	175	194	257	256	93	183	226	75	112	199	338	106	426	387	357	85	79	151	334	208	85		7545
mml-miR-138-5p	AATGCACCTGGGCAAGGATTCA	1	mml-miR-502-3p	183	279	192	133	142	130	240	235	306	199	155	166	225	156	311	262	335	254	377	174	277	216	333	228	282	421	221	176	201	216		7025
mml-miR-139-3p	AGTTCCAGGCCAACCAGGCTG	1	mml-miR-584-3p	110	163	155	70	75	145	151	234	215	452	371	173	170	397	371	134	190	330	219	200	229	154	187	188	476	402	226	166	225	429		7007
mml-miR-139-5p	CTTTCAGTCGGATGTTTGCAGC	1	mml-miR-30a-3p	118	344	244	131	141	196	313	177	248	196	162	242	139	107	88	122	117	98	327	310	348	251	379	196	169	136	287	406	602	171		6765
mml-miR-140-3p	ATGCACCTGGGCAAGGATTCTGA	1	mml-miR-500a-3p	159	302	201	164	167	122	310	235	272	221	177	271	243	138	277	198	200	163	348	188	329	191	330	167	167	258	212	207	212	226		6655
mml-miR-140-5p	AATCCTTGGAACCTAGGTGTGAGT	1	mml-miR-362-5p	135	191	127	120	103	88	227	168	342	146	117	154	235	168	246	218	450	266	367	143	264	116	299	206	300	314	216	164	319	235		6444
mml-miR-141-3p	AGGAAGCCCTGGAGGGGCTGGAG	1	mml-miR-671-5p	117	140	106	129	82	90	231	231	253	112	102	173	174	125	460	242	339	285	346	196	192	419	260	262	189	347	191	190	293	135		6411
mml-miR-141-5p	TGCGCAAGCTACTGCCTTGCT	1	mml-let-7i-3p	196	205	142	284	191	129	198	236	169	194	177	180	219	207	411	200	193	251	227	217	223	263	171	194	216	247	215	186	184	183		6308
mml-miR-142-3p	ACAGCAATCGCTCTTTTGGAAG	1	mml-miR-4766-3p	144	199	181	89	71	158	75	181	136	167	117	68	230	185	207	331	364	311	223	203	212	137	223	162	320	350	152	285	428	327		6236
mml-miR-142-5p	TAAGGTGCATCTAGTGCAGTTAG	1	mml-miR-18b	219	206	129	229	305	120	461	171	496	127	112	269	268	61	190	211	123	155	242	210	99	277	269	289	85	172	135	191	194	89		6104
mml-miR-143-3p	CAAAGTGCTCATAGTGCAGGTAG	1	mml-miR-20b-5p	207	276	174	253	418	120	425	140	361	167	122	243	264	57	65	224	100	68	257	273	156	208	357	256	52	67	169	267	268	50		6064
mml-miR-143-5p	TGTCTTGCAGGCCGTCATGCA	1	mml-miR-431	201	387	283	147	150	175	298	185	316	105	83	327	174	48	145	219	185	85	352	108	182	266	487	247	133	148	183	129	107	112		5967
mml-miR-144	AATTGCACGGTATCCATCTGTA	1	mml-miR-363-3p	283	240	145	182	173	161	151	147	231	179	122	123	206	77	52	335	322	120	323	142	230	92	336	164	124	117	325	228	350	100		5780
mml-miR-145-3p	TGGCCTCTGGGTGTGTACCCT	1	mml-miR-7180-3p	98	145	87	100	94	93	216	200	189	176	156	195	215	159	230	192	188	131	287	224	207	388	232	249	228	267	253	166	191	216		5772
mml-miR-145-5p	TCCAGCATCAGTGATTTTGTTG	1	mml-miR-338-3p	104	238	102	129	304	182	267	105	407	151	98	432	171	52	58	136	171	73	152	206	237	66	260	160	163	123	290	236	238	242		5553
mml-miR-146a-3p	TTTTTCATTATTGCTCCTGACC	1	mml-miR-335-3p	170	145	123	106	46	97	93	152	152	78	73	45	137	109	133	204	152	272	203	116	105	153	224	135	547	625	180	227	226	420		5448
mml-miR-146a-5p	TTGGTCCCCTTCAACCAGCTGT	1	mml-miR-133d-3p	99	133	60	128	99	207	309	69	80	556	58	19	158	174	130	31	374	776	76	86	88	287	260	41	138	61	206	444	153	67		5367
mml-miR-146b-3p	TGTGCTTGCTCGTCCCGCCTGCA	1	mml-miR-636	136	116	117	97	86	69	134	145	110	197	199	83	153	243	263	196	241	249	195	122	111	166	131	199	345	313	252	197	190	304		5359
mml-miR-146b-5p	ACTGGACTTGGAGTCAGAAGCA	1	mml-miR-378d	161	133	131	208	229	59	346	133	425	118	87	273	90	102	291	130	166	111	279	146	112	231	202	229	139	206	182	127	172	126		5344
mml-miR-147a	AGCTGGTTTCACATGGTGGCTTAGA	1	mml-miR-29b-2-5p	144	142	116	173	266	72	363	133	285	123	105	294	166	113	212	146	94	77	188	226	135	350	214	268	107	149	193	192	186	88		5320
mml-miR-147b	TCGGCAACTCCTCACTCACCGT	1	mml-miR-6790-3p	80	129	120	94	61	65	132	143	86	148	163	98	209	208	205	232	193	202	206	192	169	177	170	149	193	280	155	214	194	205		4872
mml-miR-148a-3p	TTCCCTTTGTCATCCTATGCCT	1	mml-miR-204-5p	106	381	485	82	77	238	51	157	62	98	83	41	52	399	413	85	55	420	70	66	56	114	83	61	153	187	143	235	192	132		4777
mml-miR-148a-5p	ATCATAGAGGAAAATCCACGT	2	mml-miR-376a-3p	148	239	191	147	85	239	133	102	179	87	70	191	159	43	90	160	214	100	317	198	333	118	314	94	86	120	94	215	196	114		4776
mml-miR-148b-3p	TCAAGAGCAATAACGAAAAATGT	1	mml-miR-335-5p	95	105	83	100	62	104	105	77	178	155	100	115	136	43	78	152	122	106	382	157	356	35	284	85	258	331	75	286	222	285		4672
mml-miR-148b-5p	ACCGTCTCTTCTGTTTCCCAGGATCC	1	mml-miR-6827-3p	107	196	199	80	68	122	124	147	86	133	120	97	155	207	213	112	114	215	188	131	134	230	251	204	169	168	183	209	168	131		4661
mml-miR-149-3p	AGGGGCTGGCTTTCCTCTGGT	1	mml-miR-185-3p	119	97	59	82	103	65	221	104	199	170	169	199	115	101	119	127	129	99	179	74	124	94	132	142	191	168	322	141	134	189		4167
mml-miR-149-5p	GAGGGTTGGGTGGAGGCTCTCC	1	mml-miR-296-3p	57	175	137	55	33	113	140	111	139	226	200	142	160	96	107	142	96	85	232	91	224	92	165	88	174	159	204	163	138	160		4104
mml-miR-150-3p	GAAGTTCTGTTATACACTCAGGCT	1	mml-miR-148b-5p	120	139	78	128	187	82	188	62	234	90	53	172	116	96	86	129	156	119	117	201	103	115	161	207	158	137	132	197	201	126		4090
mml-miR-150-5p	ACCATCGACCGTTGATTGTACC	1	mml-miR-181a-3p	84	149	144	75	56	104	108	173	99	101	93	84	103	61	153	157	119	154	265	87	199	74	247	77	173	239	131	151	131	169		3960
mml-miR-151-3p	CCCAGTGTTCAGACTACCTGTTC	1	mml-miR-199a,mml-miR-199a-5p	72	95	89	52	50	75	48	96	49	78	101	39	166	93	111	106	145	199	153	179	236	77	183	122	92	103	206	441	352	66		3874
mml-miR-151-5p	AGATCGACCGTGTTATATTCGC	1	mml-miR-369-5p	139	259	177	107	111	137	169	69	198	58	49	176	110	39	42	118	70	72	168	149	160	158	327	158	71	67	110	138	159	71		3836
mml-miR-152-3p	TCACCATGACCCTGATCCCACT	1	mml-miR-1240	75	70	100	80	70	55	91	88	54	170	167	72	147	209	197	109	70	130	178	131	129	163	97	86	123	156	180	208	224	123		3752
mml-miR-152-5p	TAATCCTTGCTACCTGGGTGAGA	1	mml-miR-500a-5p,mml-miR-500b-5p	114	130	96	68	69	65	131	152	198	93	68	62	98	133	136	130	271	174	125	80	97	100	147	149	194	190	122	88	92	124		3696
mml-miR-153-1-5p	TAGGTAGTTTCCTGTTGTTGGG	1	mml-miR-196b-5p	139	124	75	127	207	75	372	68	368	73	60	313	90	41	54	70	25	41	102	111	75	192	213	150	42	32	119	130	156	36		3680
mml-miR-153-2-5p	TATTGCACATTACTAAGTTGC	1	mml-miR-32-5p	199	118	73	267	165	99	161	60	259	64	66	142	77	27	93	93	60	166	169	130	54	120	113	171	97	64	99	114	190	91		3601
mml-miR-153-3p	GTTGGGACAAGAGAACGGTCT	1	mml-miR-3122	106	92	96	102	121	46	227	138	138	103	86	136	131	94	105	138	132	96	146	122	113	170	165	126	68	136	114	126	121	90		3584
mml-miR-154-3p	CAGTGCAATGTTAAAAGGGC	1	mml-miR-130a-3p	119	109	107	154	282	58	250	85	217	100	76	205	74	59	56	61	51	44	118	245	75	153	157	178	60	85	76	121	101	80		3556
mml-miR-154-5p	AATACTGCCGGGTAATGATGGA	1	mml-miR-200c-3p	75	135	81	82	94	49	255	54	257	72	61	172	63	52	39	35	29	41	91	347	70	353	131	420	35	38	109	108	105	34		3487
mml-miR-155	CTTATGCAAGATTCCCTTCTAC	1	mml-miR-491-3p	90	119	146	91	44	95	55	134	51	97	108	46	155	93	151	123	82	179	141	142	118	110	111	67	102	171	72	220	158	119		3390
mml-miR-181a-3p	CCCAGTGTTCAGACTACCTGTTC	1	mml-miR-199a,mml-miR-199a-5p	62	83	59	67	40	62	49	80	46	86	69	36	138	75	103	96	106	174	142	145	175	77	179	99	72	91	181	389	316	46		3343
mml-miR-181a-5p	TGGTAGACTATGGAACGTAGG	1	mml-miR-379-5p	121	219	128	120	208	103	269	47	274	52	38	306	89	21	27	89	39	23	101	123	65	148	226	139	32	17	64	105	104	14		3311
mml-miR-181b-1-3p	TAAGGTGCATCTAGTGCAGATA	1	mml-miR-18a-5p	123	98	81	151	125	72	163	112	159	72	71	98	130	29	183	114	73	107	153	101	55	168	121	111	96	150	84	120	118	51		3289
mml-miR-181b-2-3p	CCTCTTCTCCCTCCTCCCA	1	mml-miR-877-3p	60	57	80	62	22	57	67	97	48	85	122	50	124	126	202	105	189	145	126	92	70	136	88	116	258	188	167	107	106	120		3272
mml-miR-181b-5p	AGGTTACCCGAGCAACTTTGCAT	1	mml-miR-409-5p	81	215	177	82	59	115	104	103	107	40	38	108	93	51	71	114	150	52	214	82	166	119	253	81	79	96	79	92	100	57		3178
mml-miR-181c-3p	TAATGCCCCTAAAAATCCTTAT	2	mml-miR-365-3p	94	131	90	58	65	44	89	97	88	97	52	79	114	63	48	183	115	79	146	135	176	124	120	113	132	238	61	104	94	126		3155
mml-miR-181c-5p	CCTATTCTTGATTACTTGTTTC	1	mml-miR-26a-2-3p	119	126	106	124	63	94	52	78	65	120	111	50	94	73	91	104	78	212	100	122	105	89	102	70	86	69	104	196	250	95		3148
mml-miR-181d	TGATGGGTGAATTTGTAGAAGG	1	mml-miR-1262-3p	61	69	40	88	302	33	36	28	70	105	63	69	56	31	27	40	20	29	118	136	124	40	157	160	159	63	301	275	172	244		3116
mml-miR-182	TAATCCTTGCTACCTGGGTGAGA	1	mml-miR-500a-5p,mml-miR-500b-5p	98	99	91	50	76	56	102	111	174	85	58	61	71	121	103	111	236	125	148	89	77	97	125	106	140	150	75	69	105	106		3115
mml-miR-183-3p	CAGTGCAATAGTATTGTCAAAGC	1	mml-miR-301a-3p	89	72	55	147	223	56	293	56	266	89	65	196	132	16	52	76	36	44	143	83	66	115	156	132	31	28	59	148	126	27		3077
mml-miR-183-5p	AATCGTACAGGGTCATCCACTT	1	mml-miR-487b-3p	88	214	175	106	78	108	105	78	124	52	43	122	88	77	55	98	94	47	203	99	131	128	192	71	67	53	76	86	123	54		3035
mml-miR-184	TCTAGTAAGAGTGGCAGTCGA	1	mml-miR-628-3p	67	99	62	61	129	53	150	52	161	83	60	138	47	71	47	58	62	57	128	117	110	85	140	91	74	65	93	115	129	60		2664
mml-miR-185-3p	TTTGGTCCCCTTCAACCAGCTG	1	mml-miR-133c-3p	56	56	37	59	47	86	140	37	39	204	30	8	83	96	58	16	147	446	40	35	28	153	129	29	72	35	115	182	83	22		2568
mml-miR-185-5p	TTTCAGTCAGATGTTTGCTGC	1	mml-miR-30d-3p	77	115	73	96	140	60	136	41	117	69	36	110	72	34	85	79	66	70	86	80	72	88	115	83	54	58	62	90	129	76		2469
mml-miR-186-3p	TATTCATTTATCCCCAGCCTA	1	mml-miR-664	65	65	81	66	37	39	43	114	45	63	54	30	61	113	163	80	69	129	111	73	60	92	104	77	119	141	104	100	90	68		2456
mml-miR-186-5p	TCTCTGGGCCTGTGTCTTAGGC	1	mml-miR-330-5p	48	68	54	46	33	41	48	82	47	65	48	42	101	149	88	92	89	119	71	78	69	119	66	94	125	119	98	91	118	115		2423
mml-miR-187-3p	TCAGTGCATGACAGAACTTGG	1	mml-miR-152-3p	106	52	50	118	191	47	71	42	136	43	37	99	26	56	48	29	19	52	127	168	112	118	121	137	35	59	69	102	85	52		2407
mml-miR-187-5p	AAAGTTCTGAGACACTCCGACT	1	mml-miR-148a-5p	60	96	93	27	22	50	54	84	90	42	49	50	37	50	61	61	107	89	98	47	48	48	128	92	175	179	140	95	109	93		2374
mml-miR-188-3p	CTACCTACTTTGCTCATCTTTG	1	mml-miR-1255a-3p	60	79	55	80	35	54	61	52	42	45	45	37	81	75	77	84	62	104	83	113	100	86	78	81	75	71	80	165	164	76		2300
mml-miR-188-5p	AACATAGAGGAAATTCCACGT	1	mml-miR-376c-3p	69	113	83	66	32	100	85	45	115	31	15	64	60	14	61	75	125	34	150	66	112	54	205	71	68	74	48	84	60	48		2227
mml-miR-190a-3p	ACCTGGCATACAATGTAGATTTCTGT	1	mml-miR-221-5p	65	68	69	61	59	40	141	58	167	63	36	87	43	53	76	55	76	50	113	58	60	64	116	72	60	82	75	72	100	57		2196
mml-miR-190a-5p	AAACATTCGCGGTGCACTTCTT	1	mml-miR-543-3p	65	113	89	42	47	78	62	71	99	45	31	82	59	57	34	70	95	36	138	70	95	41	189	103	77	62	76	41	61	56		2184
mml-miR-190b	TATTTCACGACACCAGGGTT	1	mml-miR-138-3p	47	55	67	78	61	39	67	79	45	99	92	65	65	59	86	59	60	33	147	57	132	49	107	47	62	79	68	75	79	70		2128
mml-miR-191-3p	AACACACCTGGTTAACCTCTTT	2	mml-miR-329-3p	65	164	139	60	39	70	27	90	62	43	40	25	73	47	41	88	77	22	108	74	78	90	145	69	78	65	52	52	63	43		2089
mml-miR-191-5p	AGCTGGTGTTGTGAATCAGGCCG	1	mml-miR-138-5p	61	72	65	49	98	33	167	84	163	29	39	82	54	29	111	68	42	36	127	39	43	69	177	83	28	51	66	42	55	21		2083
mml-miR-192-3p	CTCCTATATGATGCCTTTCTTC	1	mml-miR-337-3p	49	142	139	49	22	111	55	60	40	32	36	39	85	51	44	79	53	50	82	74	65	103	136	51	43	37	59	97	104	39		2026
mml-miR-192-5p	TAACAGTCTACAGCCATGGTCG	1	mml-miR-132-3p	73	65	45	47	58	35	90	75	135	59	42	48	42	47	38	52	114	58	131	42	75	42	129	68	58	94	76	52	69	49		2008
mml-miR-193a-3p	TTGTACATGGTAGGCTTTCATT	1	mml-miR-493-5p	81	86	45	49	130	52	143	36	303	39	26	219	30	17	9	33	27	8	48	44	41	100	122	85	21	5	76	35	47	19		1976
mml-miR-193a-5p	GGGTTCCTGGCATGCTGATTT	1	mml-miR-23b-5p	67	46	53	70	88	42	92	27	72	61	73	82	71	39	85	44	30	38	106	67	54	110	66	77	37	62	72	50	61	46		1888
mml-miR-193b-3p	TATGGCACTGGTAGAATTCACTG	1	mml-miR-183-5p	43	49	28	27	48	23	205	48	233	49	52	175	42	31	24	34	21	27	104	81	29	86	72	73	25	19	81	60	48	26		1863
mml-miR-193b-5p	ACTGCAGTGAAGGCACTTGT	1	mml-miR-17-3p	62	32	37	55	54	14	71	64	102	31	32	45	40	18	135	45	70	62	86	45	42	68	77	85	62	109	57	33	37	48		1718
mml-miR-194-3p	TGAGAACTGAATTCCATAGGCT	1	mml-miR-146b-5p	66	42	46	19	51	30	79	42	138	30	26	76	39	22	13	46	68	40	75	40	135	34	85	59	57	84	36	52	113	62		1705
mml-miR-194-5p	CACGTGGCCGAAACAGAGAAGG	1	mml-miR-942-3p	47	13	13	50	49	11	51	44	52	97	64	74	66	76	60	83	65	39	48	57	63	24	31	35	78	108	45	74	84	82		1683
mml-miR-195-3p	TAACTGGTTGAACAACTGAACC	1	mml-miR-582-3p	9	121	107	14	11	124	10	69	27	64	48	11	39	3	2	45	66	6	13	36	15	29	14	23	70	80	103	163	230	73		1625
mml-miR-195-5p	TTCCCTTTGTCATCCTTTGCCT	1	mml-miR-211	48	37	23	38	36	23	24	65	15	30	30	6	73	72	85	64	49	92	48	41	23	77	39	31	48	75	85	163	140	42		1622
mml-miR-196a-3p	TACGGATAAGCAAAGAAAGTGG	1	mml-miR-1255b	32	48	33	44	85	32	76	35	69	42	31	73	62	45	39	43	30	32	74	76	80	39	74	67	30	61	41	90	92	45		1620
mml-miR-196a-5p	TCTTTGGTTATCTAGCTGTATGA	3	mml-miR-9-5p	38	39	33	27	32	30	56	27	76	21	26	61	29	39	15	34	35	54	98	76	204	51	84	53	40	22	47	69	146	33		1595
mml-miR-196b-3p	ACTGCATTATGAGCACTTAAAGT	1	mml-miR-20a-3p	58	81	32	79	37	33	94	52	116	33	22	52	32	25	105	45	40	41	78	37	15	77	58	44	28	52	27	50	62	21		1526
mml-miR-196b-5p	GGGGAGCCAGGAAGTATTGATGT	1	mml-miR-505-5p	47	52	47	49	46	35	53	18	52	40	35	58	50	49	41	44	45	42	94	41	97	19	87	34	73	56	53	44	48	70		1519
mml-miR-197-3p	CCAGTATTAACTGTGCTGCTGAA	1	mml-miR-16-1-3p	38	57	55	84	73	34	108	51	54	16	27	53	63	10	148	41	14	49	74	41	35	76	46	53	16	52	22	57	37	27		1511
mml-miR-197-5p	CCTATTCTTGGTTACTTGCACG	1	mml-miR-26a-1-3p	49	67	67	43	25	52	34	52	28	44	32	23	51	126	30	38	54	53	31	52	45	54	29	30	42	47	46	66	101	48		1459
mml-miR-198	TACCCTGTAGAACCGAATTTGTG	1	mml-miR-10b-5p	42	37	42	20	27	25	40	50	103	32	25	41	43	31	30	23	66	107	80	28	56	21	44	26	63	76	41	43	67	45		1374
mml-miR-199a	TCTAACCGCACCGTCCCCCAG	1	mml-miR-1235	22	0	0	16	30	0	8	23	13	56	44	7	71	53	34	57	57	44	80	26	116	19	78	30	122	58	66	31	30	157		1348
mml-miR-199a-3p	GAACGGCTTCATACAGGAGTT	1	mml-miR-337-5p	35	86	61	50	57	60	117	24	67	19	16	82	62	4	26	19	22	11	65	47	46	40	97	49	13	23	31	34	34	17		1314
mml-miR-199a-5p	AGGGGTGCTATCTGTGATTGA	1	mml-miR-342-5p	20	16	30	21	22	12	53	40	67	56	53	84	39	19	25	25	35	28	100	34	103	14	59	54	46	71	47	44	58	37		1312
mml-miR-200a-3p	TCGGATCCGTCTGAGCTTGGCT	1	mml-miR-127-3p	37	60	59	39	43	35	83	40	46	18	21	75	51	16	32	25	32	20	94	34	56	77	71	30	22	21	48	30	51	15		1281
mml-miR-200a-5p	TCTGAAAGAGCAGTTGGTGTTT	1	mml-miR-4766-5p	32	53	33	43	76	24	57	39	48	35	24	47	38	32	46	45	23	19	52	39	36	45	64	58	23	42	23	45	49	29		1219
mml-miR-200c-3p	TAATTTTATGTATAAGCTGGT	1	mml-miR-590-3p	47	39	13	69	118	20	94	20	131	27	33	92	36	18	8	27	7	16	34	46	18	62	57	49	11	4	21	32	57	9		1215
mml-miR-200c-5p	CCTACTCCCTCAGGCACATC	1	mml-miR-550-3p	41	39	27	32	13	21	24	43	44	43	37	36	40	41	36	50	44	48	61	34	31	16	55	35	75	59	56	43	20	49		1193
mml-miR-203	ACGGCCTGTTTCTCTCCTAG	1	mml-miR-7165-3p	24	37	50	11	7	23	30	48	28	45	41	21	47	24	26	59	52	35	58	32	29	32	39	22	70	71	57	62	49	59		1188
mml-miR-204-3p	CCATTTCCCTGCCATTCCCTTGGC	1	mml-miR-4446-5p	22	50	64	17	15	30	29	28	25	45	51	36	33	25	40	23	24	27	58	44	39	49	66	56	43	59	43	26	32	36		1135
mml-miR-204-5p	TGAGACCTCTGGGTTCTGAGC	1	mml-miR-769-5p	14	33	31	13	11	33	16	38	34	32	28	15	67	29	37	57	90	46	47	29	60	24	43	32	54	50	35	42	57	37		1134
mml-miR-205	TGAGATGAAGCACTGTAGCTC	1	mml-miR-143-3p	57	13	11	10	17	21	55	15	125	41	30	45	70	20	14	32	22	39	103	25	17	28	38	20	109	23	51	21	26	17		1115
mml-miR-206	CTCAGATTCTGGATTCCTACC	1	mml-miR-7194-3p	15	26	41	16	12	30	36	37	19	35	44	18	51	29	51	39	35	42	59	27	64	24	69	16	35	36	35	74	51	47		1113
mml-miR-208a-3p	TGAAGGTCTACTGTGTGCCAGG	1	mml-miR-493-3p	37	68	45	31	67	24	89	17	71	19	15	103	30	8	18	23	11	11	64	25	24	54	71	46	5	10	32	31	28	7		1084
mml-miR-208a-5p	ATGCTGACATATTTACTAGAGG	1	mml-miR-628-5p	21	34	25	21	67	19	59	25	110	31	22	50	22	9	10	20	20	8	39	41	25	28	68	53	31	18	41	44	52	38		1051
mml-miR-208b-3p	TATGTGGGACGGTAAACCGCTT	1	mml-miR-299-3p	25	81	64	38	50	49	68	21	53	14	19	90	37	17	15	22	16	13	31	31	33	54	48	18	12	19	15	28	27	10		1018
mml-miR-208b-5p	AAGAGCTTTTGGGAATTCAGG	1	mml-miR-3140	23	28	22	23	44	10	45	17	48	25	23	30	33	21	41	42	30	28	45	28	34	43	63	60	26	29	35	45	54	11		1006
mml-miR-210-3p	AGGCCTCTCAGGGTTTCTGG	1	mml-miR-7172-5p	23	26	11	14	12	16	22	22	20	23	14	12	39	22	31	31	59	43	40	23	26	21	34	37	80	65	56	53	51	52		978
mml-miR-210-5p	ATTGGGAACATTTTGCATGTGT	1	mml-miR-450a-1-3p	30	24	18	42	67	10	76	13	62	9	14	45	29	10	67	38	16	14	62	35	20	67	45	52	11	39	16	14	6	26		977
mml-miR-211	GAATCTGAGAAGGCGCACAAGGTTTGTG	1	mml-miR-3200-5p	30	14	29	16	22	16	41	19	49	30	8	31	20	35	35	28	46	17	49	27	30	11	39	43	47	52	49	45	49	47		974
mml-miR-212-3p	GCAGGCCATATTGTGCTGCCTCA	1	mml-miR-15a-3p	31	33	20	48	13	32	40	24	30	19	16	22	39	17	75	30	54	58	45	34	26	18	18	20	28	60	19	33	43	25		970
mml-miR-212-5p	ACCTCCTGTGTGCATGGATTAC	1	mml-miR-660-3p	26	26	29	15	14	21	23	31	27	34	28	14	40	46	36	47	53	56	35	21	24	14	27	23	41	51	32	47	42	38		961
mml-miR-214-3p	TCGGGGATCATCATGTCACGAGA	1	mml-miR-542-5p	17	37	10	37	41	12	58	22	47	29	25	53	41	18	34	38	28	17	47	40	29	47	33	32	30	34	18	19	18	46		957
mml-miR-214-5p	TGACTTCTACCTGTTCCAAAG	1	mml-miR-6505-3p	22	36	29	19	17	10	19	36	23	29	32	9	26	36	38	38	30	54	32	30	26	29	29	32	37	42	30	65	47	43		945
mml-miR-215-3p	AAAGTGCTGCGACATTTGAGCGT	1	mml-miR-372-3p	69	73	51	59	86	28	5	8	16	3	4	8	12	2	11	6	11	12	43	48	28	78	62	97	24	50	10	8	3	29		944
mml-miR-215-5p	GTCCAGTTTTCCCAGGAATCCCTT	1	mml-miR-145-5p	22	27	37	20	28	10	36	29	31	29	16	22	45	32	19	42	32	98	29	34	33	34	27	18	53	27	13	41	31	21		936
mml-miR-216a-3p	CTGGTACAGGCCTGGGGGACA	1	mml-miR-150-3p	29	28	19	21	25	10	56	37	30	35	34	28	29	23	32	20	26	17	60	16	68	32	34	28	27	29	52	24	22	25		916
mml-miR-216a-5p	TCTGTGAGACCAAAGAACTACT	1	mml-miR-4677-3p	20	27	29	21	16	19	15	26	9	28	34	14	37	30	40	22	33	41	33	33	42	31	36	21	22	45	25	63	50	22		884
mml-miR-216b	GTGGTTATCCCTGTCCTGTTCG	1	mml-miR-487b-5p	26	54	44	22	19	47	21	20	21	28	24	31	32	20	13	31	23	16	44	33	29	26	46	32	24	13	41	32	41	21		874
mml-miR-217a	CCATCGACCGTTGAGTGGACC	1	mml-miR-181c-3p	13	38	26	13	6	31	38	28	47	11	21	38	35	9	31	26	33	32	47	26	42	17	57	20	32	43	25	29	27	31		872
mml-miR-217b	TCTGGCTCCGTGTCTTCACTCCC	1	mml-miR-149-5p	32	11	10	30	55	9	6	30	14	36	25	13	14	7	5	12	8	10	20	14	12	10	12	12	17	12	235	91	74	13		849
mml-miR-218-1-3p	CTGTACAGGCCACTGCCTTGCC	1	mml-let-7g-3p	25	38	20	33	15	29	32	25	22	22	12	22	34	19	47	29	37	47	34	30	31	21	19	24	27	46	19	31	30	24		844
mml-miR-218-2-3p	GAAGTGCTTCGATTTTGGGGTGT	1	mml-miR-373	45	47	40	66	96	22	3	12	5	8	5	5	8	10	11	8	3	6	40	57	27	71	43	60	36	50	4	10	4	42		844
mml-miR-218-5p	TTCTATAAATTCATCCATCACA	1	mml-miR-1262-5p	25	31	10	29	24	29	3	8	13	26	12	9	15	8	9	17	9	17	30	23	22	8	45	21	61	29	52	79	63	97		824
mml-miR-219	TGGGAGAAGGCTGTTTACTCT	1	mml-miR-30c-2-3p	5	33	25	13	11	22	44	24	18	34	24	40	19	3	6	9	7	3	91	27	62	34	59	28	12	13	47	47	51	10		821
mml-miR-219-3p	ATCACACAAAGGCAACTTTTGT	1	mml-miR-377-3p	27	32	19	23	9	39	20	22	43	10	4	22	23	7	18	23	42	25	45	15	31	17	86	33	22	24	27	20	34	19		781
mml-miR-219-5p	TACGTCATCGTTGTCATCGTCA	1	mml-miR-598-3p	16	29	34	24	34	25	23	9	26	17	15	27	43	11	36	32	15	21	45	29	30	24	23	17	22	46	19	17	34	27		770
mml-miR-221-3p	TGCCAATTCCATAGGTCACAG	1	mml-miR-192-3p	14	41	19	17	20	8	10	22	22	23	12	18	36	25	23	42	39	22	29	25	37	14	24	17	33	25	28	50	46	21		762
mml-miR-221-5p	GCAAAGCACACGGCCTGCAGAGA	1	mml-miR-330-3p	20	18	18	14	11	11	15	26	23	36	19	23	24	17	14	26	29	21	38	30	45	24	24	19	33	46	32	37	34	27		754
mml-miR-222-3p	AGAGGCTGGCCGTGATGAATTC	1	mml-miR-485-5p	21	49	26	21	19	19	18	11	29	26	16	41	15	10	21	23	17	7	62	23	17	15	54	55	10	23	29	24	19	22		742
mml-miR-222-5p	GCGACCCACTCTTGGTTTCCA	1	mml-miR-551a	1	9	2	3	3	4	13	32	11	23	21	16	7	16	25	6	7	27	51	117	53	79	42	78	4	4	25	33	27	2		741
mml-miR-223	CATGCTAGAACAGAAAGAATGGG	1	mml-miR-3146	10	21	26	18	24	16	10	12	10	20	13	17	16	34	19	35	33	17	49	36	59	18	41	25	28	35	13	20	27	38		740
mml-miR-224-3p	CAGGGCTGGCAGTGAGATGGG	1	mml-miR-4446-3p	8	14	12	19	14	7	30	14	27	38	45	27	29	10	20	13	9	7	58	22	44	16	48	30	12	33	24	31	22	19		702
mml-miR-224-5p	CTTTTATCTGAAACTGCTTGA	1	mml-miR-5697-3p	21	22	22	32	24	21	30	17	22	13	14	12	28	36	13	43	28	19	20	29	15	23	25	27	14	13	23	32	46	16		700
mml-miR-296-3p	TCTGTACAGACCCTGGCTTT	1	mml-miR-1284	17	24	17	12	7	12	10	20	15	21	18	15	18	39	18	32	43	33	33	24	24	19	22	7	36	20	34	19	41	30		680
mml-miR-296-5p	TTAAGACTTGCAGTGATGTTT	1	mml-miR-499-5p	22	17	8	36	44	11	49	22	43	18	20	28	15	9	28	10	6	21	31	14	27	38	35	17	14	12	28	25	21	6		675
mml-miR-297	AATCATTCACGGACAACACTTTT	1	mml-miR-382-3p	25	31	33	16	13	32	15	16	19	14	12	18	19	7	15	23	20	10	41	18	36	16	62	19	18	28	17	28	29	12		662
mml-miR-298	TTAATATCGGACAACCATTGT	1	mml-miR-889-3p	22	62	42	33	17	45	22	17	36	16	14	34	15	2	5	19	14	11	26	18	39	17	33	13	5	11	15	16	32	7		658
mml-miR-299-3p	TCCTTCATTCCACCGGAGTCTG	1	mml-miR-205	9	23	16	6	7	14	14	17	38	19	17	16	28	17	21	16	15	22	51	17	48	13	28	28	17	31	54	24	14	17		657
mml-miR-299-5p	AAGGAGCTCACAGTCTATTGAG	1	mml-miR-28-5p	21	20	13	11	18	13	18	12	52	19	10	25	19	3	15	22	31	19	36	17	25	8	42	39	21	35	26	15	19	28		652
mml-miR-301a-3p	CATCCCTTGCATGGTGGAGGGT	1	mml-miR-188-5p	9	19	18	10	8	10	14	26	19	18	19	8	33	19	37	34	37	36	28	19	22	18	24	14	20	44	18	23	25	21		650
mml-miR-301a-5p	AGCCCCTGCCCACCGCACACTG	1	mml-miR-210-5p	21	11	13	13	10	16	24	10	16	27	28	16	21	25	46	28	32	35	31	15	14	22	19	28	20	29	18	15	19	9		631
mml-miR-301b	TGTGCGCAGGGAGACCTCTCCC	1	mml-miR-933	3	9	4	3	1	1	15	5	20	1	5	16	19	47	33	28	19	38	5	58	3	62	7	33	24	41	30	36	35	26		627
mml-miR-302a-3p	AGGGACGGGACGCGGTGCAGTGTT	1	mml-miR-92b-5p	8	12	13	12	2	9	12	15	10	15	14	18	30	13	35	14	13	22	31	25	31	19	20	38	24	33	47	35	28	26		624
mml-miR-302a-5p	CGGGGCAGCTCAGTACAGGAT	1	mml-miR-486-3p	29	10	7	14	14	24	16	20	28	10	5	11	12	3	42	16	42	36	52	4	11	11	35	55	18	42	17	3	16	7		610
mml-miR-302b	TATGGCTTTTTATTCCTATGTGA	2	mml-miR-135a-5p	46	18	16	29	24	13	18	14	31	5	4	11	15	12	15	19	33	33	8	20	12	17	16	30	30	26	19	21	10	34		599
mml-miR-302c	ATCCTTGCTATCTGGGTGCTA	1	mml-miR-502-5p	14	23	17	12	8	16	25	23	28	14	13	12	16	15	18	30	41	24	21	11	13	21	24	18	33	29	24	10	24	22		599
mml-miR-302d	TTTGTTCGTTCGGCTCGCGTGA	1	mml-miR-375	31	17	16	8	22	1	57	10	65	54	17	15	9	5	16	8	15	6	37	5	22	11	27	28	17	32	20	7	11	5		594
mml-miR-320a	TTTGTGACCTGGTCCACTACCC	1	mml-miR-758-3p	24	44	43	6	8	29	14	24	11	12	4	12	21	12	12	24	35	17	28	14	17	22	47	19	11	16	13	19	26	6		590
mml-miR-320b	GTGCATTGCTGTTGCATTGC	1	mml-miR-33b-5p	9	16	17	38	20	9	25	28	16	10	10	13	25	3	71	23	6	15	32	10	17	18	20	18	18	46	19	21	8	8		589
mml-miR-320c	TGTGACAGATTGATAACTGAAA	1	mml-miR-542-3p	20	17	4	34	43	7	33	2	61	16	6	44	21	3	15	27	9	9	37	22	22	22	29	18	8	16	8	16	11	9		589
mml-miR-323a-3p	TGGCAGTGTATTGTTAGCTGGT	1	mml-miR-449a-5p	10	10	7	8	20	3	92	30	82	24	18	65	16	8	6	13	4	5	7	16	0	27	17	18	6	1	12	19	17	1		562
mml-miR-323a-5p	GTGGATATTCCTTCTATGTTTA	1	mml-miR-376c-5p	17	42	27	7	10	33	8	19	11	17	9	8	29	3	9	24	15	17	12	35	29	11	32	16	12	10	9	49	28	11		559
mml-miR-323b-3p	TGGAATGTAAGGAAGTGTGTGG	1	mml-miR-206	24	8	0	20	40	12	41	3	32	28	5	18	19	4	3	5	8	25	23	11	7	24	34	11	10	10	43	38	13	6		525
mml-miR-323b-5p	GAAGTTGCCCGTGTCTTTTTCG	1	mml-miR-543-5p	18	28	23	12	9	20	18	16	20	14	13	24	14	11	11	21	23	8	15	19	27	11	42	21	12	14	17	14	14	11		520
mml-miR-324-3p	TAGTAGACCGTATAGCGTACG	1	mml-miR-411-5p	20	36	27	23	24	28	34	8	39	5	4	50	14	3	7	8	9	10	18	16	12	22	30	11	2	5	9	8	17	4		503
mml-miR-324-5p	GGCAAGATGCTGGCATAGCTG	1	mml-miR-31-5p	12	36	19	8	14	5	28	19	35	12	8	18	8	6	14	11	11	14	31	14	48	15	48	19	5	11	6	6	11	3		495
mml-miR-325	CGTGGATATTCCTTCTATGTTTA	1	mml-miR-376b-5p	19	33	27	12	9	34	13	11	9	9	1	7	26	2	7	23	23	15	20	19	21	14	40	11	11	16	10	21	21	8		492
mml-miR-329-1-5p	CTTATCAGATTGTATTGTAATT	1	mml-miR-374a-3p	9	14	8	31	16	13	17	12	10	20	11	10	6	3	53	10	7	24	32	13	18	21	10	9	16	14	10	16	46	8		487
mml-miR-329-2-5p	TCTACAGTGCACGTGTCTCCAG	1	mml-miR-139-5p	9	10	16	3	5	10	8	11	30	12	12	17	10	16	4	4	9	13	26	40	25	23	31	19	23	12	18	18	33	18		485
mml-miR-329-3p	ACTCAAACTGTGGGGGCACT	2	mml-miR-371-5p	30	47	38	23	19	22	7	9	6	2	3	5	2	7	13	5	5	6	31	28	21	34	20	32	18	20	6	5	9	11		484
mml-miR-330-3p	CATGTTCTCTCGCAGCTCTGGA	1	mml-miR-7189-3p	10	25	18	11	23	13	21	10	23	12	24	36	12	7	6	12	4	9	19	7	25	3	24	4	9	13	36	21	26	18		481
mml-miR-330-5p	AACCCGTAGATCCGAACTTGTG	1	mml-miR-100-5p	14	5	8	1	5	7	17	13	55	14	8	18	6	10	2	18	22	24	22	2	21	5	12	5	43	52	14	6	24	21		474
mml-miR-331-3p	TTTTGCAATATGTTCCTGAATA	1	mml-miR-450b-5p	11	17	5	12	7	13	19	7	44	9	12	14	13	3	12	26	22	18	24	16	18	10	18	14	31	15	9	9	9	30		467
mml-miR-331-5p	CAACACCAGTCGATGGGCTGTC	1	mml-miR-21-3p	10	20	13	13	14	16	17	16	19	14	14	20	21	6	18	13	18	16	27	12	9	18	18	15	12	25	10	14	13	6		457
mml-miR-335-3p	TCAGTTATCACAGTGCTGATGCT	1	mml-miR-101-1-5p	21	8	7	31	25	5	39	10	34	5	6	17	18	2	46	11	10	14	22	11	10	8	23	16	5	10	8	14	11	3		450
mml-miR-335-5p	TAGCAGCACAGAAATATTGGC	1	mml-miR-195-5p	23	17	14	25	33	10	19	8	51	8	8	19	14	7	5	12	5	8	12	16	17	19	21	9	6	7	11	15	21	7		447
mml-miR-337-3p	TAAATCCCACGGTGCCTTCTCCT	1	mml-miR-605	12	15	13	2	10	12	8	21	14	20	21	6	12	23	12	8	9	23	26	12	7	17	26	20	25	15	20	8	11	17		445
mml-miR-337-5p	TATACAGGGGGAGACTCTTA	2	mml-miR-1185-3p	13	32	21	17	19	18	29	19	21	10	5	28	11	7	4	15	15	10	9	12	21	16	18	16	8	8	8	11	18	6		445
mml-miR-338-3p	TTTGGCACTAGCACATTTTTGC	1	mml-miR-96	9	8	11	6	4	5	35	15	54	10	8	18	10	4	21	12	13	11	25	14	17	24	22	17	4	13	22	8	11	5		436
mml-miR-338-5p	CAGTGGGGCTGCTGTTATCTG	1	mml-miR-194-3p	12	4	12	13	7	8	21	10	12	17	9	21	28	22	17	12	13	16	23	13	26	10	16	10	13	11	18	16	10	10		430
mml-miR-339-3p	CAAGTCACTAGTGGTTCCGTTTA	1	mml-miR-224-5p	38	1	1	0	3	6	11	19	98	20	36	31	0	0	1	2	18	17	89	13	2	0	2	0	3	1	12	0	1	0		425
mml-miR-339-5p	ACGTTGGCTCTGGTGGTG	1	mml-miR-1306-3p	9	6	5	10	15	8	11	12	21	10	12	13	10	2	28	11	7	6	17	15	7	11	14	32	28	25	24	10	6	11		396
mml-miR-340-3p	TGAGCCTTCTGCTGGACCCGTGA	1	mml-miR-7184-3p	4	7	8	8	14	6	12	9	8	19	10	20	21	6	12	12	19	13	37	6	17	12	17	4	20	26	24	4	2	18		395
mml-miR-340-5p	AGGATGAGCAAAGGAAGTAGT	1	mml-miR-1255a-5p	7	7	9	2	16	6	19	10	20	14	15	23	15	11	6	21	6	12	10	9	13	11	14	13	18	18	11	14	13	27		390
mml-miR-342-3p	ATCCGCACTCTGACTCTCCACC	1	mml-miR-937	9	7	10	2	4	5	13	9	16	18	14	10	20	11	18	15	16	10	17	9	9	9	10	11	26	20	33	10	18	7		386
mml-miR-342-5p	AATAATACATGGTTGATCTTT	1	mml-miR-369-3p	9	19	13	17	14	6	27	3	38	4	7	59	10	3	6	5	3	3	18	9	7	21	26	21	2	5	5	7	7	5		379
mml-miR-345	AGTGCCTGAGGGAGTAAGAGCCC	1	mml-miR-550-5p	8	14	5	9	12	3	14	7	18	24	7	16	11	16	16	7	10	13	21	14	14	8	6	16	20	17	16	9	12	14		377
mml-miR-346	AACATTCATTGTTGTCGGTGGGT	1	mml-miR-181d	12	11	4	8	13	5	35	9	47	4	10	32	7	4	15	7	5	5	27	8	7	9	29	16	9	8	9	7	7	6		375
mml-miR-361-3p	GTGCATTGTAGTTGCATTG	1	mml-miR-33a	6	10	5	27	9	5	5	10	5	1	16	14	12	1	39	4	8	28	35	12	16	11	12	10	7	16	7	14	15	9		369
mml-miR-361-5p	GCACCCAGGCAAGGATTCT	1	mml-miR-500b-3p,mml-miR-501-3p	4	4	9	8	7	13	8	10	20	18	7	9	16	14	15	21	16	12	17	5	22	4	17	11	10	13	10	12	20	15		367
mml-miR-362-3p	TTGTTCTTTGGTCTTTCAGCCA	1	mml-miR-4677-5p	10	15	18	8	6	4	9	10	13	10	6	5	11	22	16	12	18	30	11	13	8	13	12	10	11	13	5	17	19	10		365
mml-miR-362-5p	TTCAACGGGTATTTATTGAGCA	1	mml-miR-95-3p	5	24	8	7	20	5	72	2	55	4	3	46	11	1	3	1	3	5	5	11	8	12	17	14	3	4	4	8	0	2		363
mml-miR-363-3p	CTGCCCTGGCCCGAGGGACCGA	1	mml-miR-874-3p	8	13	8	6	6	4	26	5	13	20	16	14	13	7	11	6	6	12	30	11	33	6	19	14	7	7	14	13	8	6		362
mml-miR-363-5p	TGGAATGTAAAGAAGTATGTAT	2	mml-miR-1-3p	13	4	1	8	39	10	53	0	46	9	7	9	7	2	1	5	1	8	19	4	1	15	24	10	5	2	14	33	10	0		360
mml-miR-365-1-5p	ATAAACCCTCAGAGAGTCACC	1	mml-miR-7172-3p	10	15	14	8	6	4	10	12	4	11	7	8	10	18	8	12	13	6	21	6	28	7	13	4	5	17	18	24	23	12		354
[truncated: 570 more rows]

## Sheet: D. small RNA Raw Count
smallrna_rawcounts
[truncated: 3,599 more rows]
